# Supplementary material for: Identification of host proteins differentially associated with HIV-1 RNA splice variants
Source: eLife. 2021 Feb 25;10:e62470. doi: 10.7554/eLife.62470 (PMC7906601; doi:10.7554/eLife.62470)
Supplement: Figure 2—source data 1. [file elife-62470-fig2-data1.xlsx]

## Sheet: USvsPS_PerseusOutput
Protein IDs	Protein names	Majority protein IDs	Gene names	LFQ intensity US Bio1	LFQ intensity US Bio2	LFQ intensity US Bio3	LFQ intensity PS Bio1	LFQ intensity PS Bio2	LFQ intensity PS Bio3	LFQ intensity CS Bio1	LFQ intensity CS Bio2	LFQ intensity CS Bio3	Significant US vs PS (p-value and 5%FDR)	Student's T-test significant	(-)Log Student's T-test p-value	US vs PS Student's T-test p-value	Student's T-test Difference US vs PS	Fold Difference (US vs PS)
G5EA18;E5RJN7;A0A0A0MTC4;A0A0A0MTD1;F8VPI7;E7EPX0;A0A0A0MTC6;E7EVJ4;E9PH62;A0A0A0MTC5;Q9NUL3;E5RJ67;E7EVI1;H0YBY0	Double-stranded RNA-binding protein Staufen homolog 2	G5EA18;E5RJN7;A0A0A0MTC4;A0A0A0MTD1;F8VPI7;E7EPX0;A0A0A0MTC6;E7EVJ4;E9PH62;A0A0A0MTC5;Q9NUL3;E5RJ67;E7EVI1	STAU2	20.2136	19.4722	18.1538	20.8225	23.2245	22.8822	19.3175	20.2994	19.5968	+	PS	1.46176	0.0345337	-3.02983	0.122442
E7ETU5;F6Y5H0;P29558;E7EPF2;C9J9B2;C9JIJ9;Q6XE24	RNA-binding motif, single-stranded-interacting protein 1;RNA-binding motif, single-stranded-interacting protein 3	E7ETU5;F6Y5H0;P29558;E7EPF2;C9J9B2;C9JIJ9;Q6XE24	RBMS1;RBMS3	19.4545	21.6554	20.8404	22.5325	23.1109	25.2183	20.7712	20.5037	20.8231	+	PS	1.33787	0.045934	-2.97046	0.127586
Q92900	Regulator of nonsense transcripts 1	Q92900	UPF1	25.6545	25.3895	25.2875	27.4248	28.2886	27.9641	24.5079	24.5094	24.7406	+	PS	3.05811	0.000874765	-2.44864	0.183184
O96019;C9JQT2;H7C5S0	Actin-like protein 6A	O96019	ACTL6A	19.8827	20.2433	20.0265	21.7556	22.3336	23.3138	21.7235	21.5269	21.9095	+	PS	2.17967	0.006612	-2.41688	0.18726
Q13595	Transformer-2 protein homolog alpha	Q13595	TRA2A	20.9471	20.3114	22.6287	23.6737	23.6838	23.6538	23.0413	23.0848	23.1604	+	PS	1.57812	0.0264166	-2.3747	0.192817
P40938;A0A087X270	Replication factor C subunit 3	P40938	RFC3	19.2174	19.7232	19.2562	20.5291	21.9996	22.3249	20.7005	20.6868	19.9654	+	PS	1.73874	0.01825	-2.21894	0.214799
C9JF17;P05090;C9JX71;F8WBT9	Apolipoprotein D	C9JF17;P05090;C9JX71	APOD	21.0114	19.6919	19.6842	21.9137	22.0781	23.016	20.1707	25.5386	19.9488	+	PS	1.77343	0.016849	-2.20676	0.216621
Q8N5K1;I3L1N9;D6RCF4	CDGSH iron-sulfur domain-containing protein 2	Q8N5K1;I3L1N9;D6RCF4	CISD2	20.5322	20.6333	20.5708	22.039	22.7009	22.8068	21.0132	20.6777	21.4633	+	PS	2.87859	0.00132253	-1.93678	0.261199
G3XAI9;Q5BKY9;Q8N9E0	Protein FAM133B;Protein FAM133A	G3XAI9;Q5BKY9;Q8N9E0	FAM133B;FAM133A	22.2219	21.6337	21.3995	23.4083	24.1159	23.3938	19.8557	19.6034	20.1361	+	PS	2.28114	0.00523432	-1.88763	0.270251
P11387;Q969P6;E5RIC7;H0YAR3;E5RJ95;E5RFS0	DNA topoisomerase 1	P11387	TOP1	27.0343	26.9326	26.7218	28.5052	29.0256	28.5415	26.2341	26.1765	26.4794	+	PS	3.14264	0.000720051	-1.7945	0.288272
A3KMH1	von Willebrand factor A domain-containing protein 8	A3KMH1	VWA8	23.8844	23.4188	23.2711	21.6736	21.7012	21.7934	20.9855	21.1761	21.3517	+	US	3.17649	0.000666052	1.80205	3.48715
Q13085;Q59FY4;O00763;A0A0C4DGT1;A0A087WVR6;A0A087X2F8;A0A087X0W4;A0A087X126;S4R3S7;F8W8T8;H0YGH5	Acetyl-CoA carboxylase 1;Biotin carboxylase	Q13085;Q59FY4	ACACA	25.1172	24.7048	24.7936	22.8942	22.7354	23.5522	23.1008	22.8615	22.9101	+	US	2.53329	0.00292897	1.81127	3.50951
P12004	Proliferating cell nuclear antigen	P12004	PCNA	26.8539	26.9187	25.7364	24.3501	23.8832	24.1726	24.3514	24.6798	24.4459	+	US	2.36117	0.00435341	2.3677	5.16117
Q04837;A0A0G2JLD8;E7EUY5;C9K0U8	Single-stranded DNA-binding protein, mitochondrial	Q04837;A0A0G2JLD8;E7EUY5	SSBP1	26.6566	26.2916	26.2737	23.8223	23.6127	24.3272	23.8129	24.1746	23.9189	+	US	3.26808	0.000539408	2.48656	5.60441
P13995;B9A062	Bifunctional methylenetetrahydrofolate dehydrogenase/cyclohydrolase, mitochondrial;NAD-dependent methylenetetrahydrofolate dehydrogenase;Methenyltetrahydrofolate cyclohydrolase	P13995;B9A062	MTHFD2	23.1541	23.1734	22.7787	20.0995	21.7499	19.5304	21.8474	21.8142	21.9779	+	US	1.71867	0.0191131	2.57546	5.9606
P62854;Q5JNZ5	40S ribosomal protein S26;Putative 40S ribosomal protein S26-like 1	P62854;Q5JNZ5	RPS26;RPS26P11	23.7988	23.7328	23.9562	20.7049	19.9175	21.7172	24.379	21.2665	23.5231	+	US	2.35918	0.00437337	3.04942	8.27879
P05165;Q5JVH2;H0Y4B9;H0Y5U0	Propionyl-CoA carboxylase alpha chain, mitochondrial	P05165	PCCA	24.1616	24.0117	24.7666	19.6127	22.3641	20.7706	19.8044	20.4035	20.2732	+	US	1.82534	0.0149508	3.39751	10.5379
E9PHF7;Q96RQ3;F5GYT8;E9PG35;G5E9X5	Methylcrotonoyl-CoA carboxylase subunit alpha, mitochondrial	E9PHF7;Q96RQ3;F5GYT8;E9PG35;G5E9X5	MCCC1	24.2971	23.9506	24.0976	21.9603	20.0699	19.9237	20.2747	20.4527	20.0866	+	US	2.19211	0.00642518	3.46384	11.0337
P11498;E9PRE7;E9PS68	Pyruvate carboxylase, mitochondrial	P11498;E9PRE7	PC	27.3313	27.2882	27.1226	19.4653	18.4697	19.5905	20.8329	15.8009	16.7253	+	US	4.62918	2.34864e-05	8.07223	269.143
Q9HCY8	Protein S100-A14	Q9HCY8	S100A14	20.6428	18.7664	21.2404	22.468	24.0944	21.2816	21.4576	20.8008	22.7633			1.01906	0.095707	-2.39809	0.189715
K7EQ55;K7EK33;Q96EP5;K7EQ02	DAZ-associated protein 1	K7EQ55;K7EK33;Q96EP5;K7EQ02	DAZAP1	20.8301	18.8321	20.4856	22.1535	22.2146	22.4804	21.9307	18.8393	20.2901			1.63323	0.0232688	-2.23355	0.212635
A0A075B6L0;A0A075B6K9;P0CG06;P0CG05;P0CF74;A0A075B6L1;A0A075B6K8;A0A0B4J231;A0M8Q6;P0CG04;B9A064	Ig lambda-3 chain C regions;Ig lambda-2 chain C regions;Ig lambda-6 chain C region;Ig lambda-7 chain C region;Ig lambda-1 chain C regions;Immunoglobulin lambda-like polypeptide 5	A0A075B6L0;A0A075B6K9;P0CG06;P0CG05;P0CF74;A0A075B6L1;A0A075B6K8;A0A0B4J231;A0M8Q6;P0CG04;B9A064	IGLC3;IGLC2;IGLC6;IGLC7;IGLC1;IGLL5	20.6638	21.2314	18.394	22.6479	22.1076	21.8772	21.4579	18.335	20.6005			1.10927	0.0777556	-2.11452	0.230923
E9PIN3;Q9UBU9;B4E227;E9PLA7	Nuclear RNA export factor 1	E9PIN3;Q9UBU9;B4E227	NXF1	20.438	20.536	20.6806	21.7114	22.7162	22.6849	19.1124	19.7574	19.7122			2.24308	0.00571373	-1.8193	0.283359
Q96T58	Msx2-interacting protein	Q96T58	SPEN	20.7161	20.3785	20.7086	21.3905	23.1047	22.7527	20.4114	20.3618	20.4552			1.56263	0.0273762	-1.81496	0.284213
Q5JRI1;O75494;Q6IQ42;Q8WXF0	Serine/arginine-rich splicing factor 10;Serine/arginine-rich splicing factor 12	Q5JRI1;O75494;Q6IQ42;Q8WXF0	SRSF10;FUSIP1;SRSF12	21.0293	19.1271	19.4833	20.7807	22.4197	21.8482	21.4833	21.3326	21.3733			1.12155	0.0755876	-1.80297	0.286584
Q8TDX7;F8WAG2	Serine/threonine-protein kinase Nek7	Q8TDX7;F8WAG2	NEK7	20.4747	19.8883	20.3381	21.3666	23.0833	21.549	20.6821	20.0742	19.8588			1.43456	0.0367658	-1.76595	0.294033
Q9NZ08;D6RAL9	Endoplasmic reticulum aminopeptidase 1	Q9NZ08	ERAP1	22.9211	17.9917	22.181	22.9634	22.6648	22.6398	22.8799	22.7445	22.6137			0.488194	0.324942	-1.72474	0.302553
Q9NWH9;H7BXE3;H7C3F4;H0YL55;H0YLW7;H0YMW8;H0YNF3;H0YMR6;H0YLE6;H0YKH2;H0YMM0;H0YKU6	SAFB-like transcription modulator	Q9NWH9;H7BXE3;H7C3F4	SLTM	24.4968	23.9652	24.1725	25.6406	26.2554	25.8794	21.8486	22.1107	22.2296			2.71499	0.00192758	-1.71365	0.304889
E7EPN9;Q9Y520;H7C5N8;A0A0A0MS30	Protein PRRC2C	E7EPN9;Q9Y520	PRRC2C	24.2755	23.175	23.2878	25.1083	25.3746	25.2896	21.3469	21.4767	21.5567			2.02588	0.00942149	-1.67804	0.312507
E7EPA1;O60256;C9JDU5;C9JJS3;C9K0K7;C9JDH0;I3L4G9;E7EW35;I3L0S1	Phosphoribosyl pyrophosphate synthase-associated protein 2	E7EPA1;O60256;C9JDU5;C9JJS3;C9K0K7	PRPSAP2	22.0778	18.7732	18.9521	22.1775	21.3673	21.2718	19.2547	18.8526	19.0506			0.684258	0.206891	-1.67117	0.313999
Q9UKY7;D6RFH2;D6R9V8;H0Y8K3;D6RAV0;D6RDN0	Protein CDV3 homolog	Q9UKY7;D6RFH2;D6R9V8;H0Y8K3	CDV3	19.553	18.8366	19.1897	20.1385	21.2655	20.9091	18.9962	19.1669	19.1482			1.80289	0.0157437	-1.57796	0.334956
Q8TEX9;H0YN14;H0YN07;H0YMR4;H0YK93;H0YLV0;H0YL92;H0YKG5	Importin-4	Q8TEX9;H0YN14	IPO4	20.0742	20.2667	21.0572	22.132	21.7151	22.1191	20.7182	20.418	20.5551			2.00134	0.00996908	-1.52274	0.348025
Q70J99	Protein unc-13 homolog D	Q70J99	UNC13D	21.0318	20.0175	20.0696	20.4402	21.9492	23.2624	19.9393	20.4847	20.2794			0.79336	0.160931	-1.51097	0.350875
Q5QPK2;H0Y368;O60762	Dolichol-phosphate mannosyltransferase subunit 1	Q5QPK2;H0Y368;O60762	DPM1	19.1055	19.2236	20.0356	19.5213	22.6256	20.7436	20.2262	19.9046	19.8101			0.727888	0.187116	-1.50859	0.351454
B7ZL14;H0Y7W6;Q96RU3	Formin-binding protein 1	B7ZL14;H0Y7W6;Q96RU3	FNBP1	20.7194	19.8085	19.3988	22.237	21.4889	20.624	19.9764	20.1499	20.2084			1.14062	0.0723401	-1.47436	0.359893
F8VUA7;F8VQX7;Q9BZF1	Oxysterol-binding protein;Oxysterol-binding protein-related protein 8	F8VUA7;F8VQX7;Q9BZF1	OSBPL8	19.3554	19.4046	19.6711	20.9681	21.5642	20.2941	20.2109	20.2872	20.4941			1.74039	0.0181806	-1.46508	0.362216
Q9BW92;F6S7Q7;U3KQG0	Threonine--tRNA ligase, mitochondrial	Q9BW92;F6S7Q7;U3KQG0	TARS2	20.1415	20.0695	20.8701	20.9243	22.2383	22.2581	19.578	20.0198	19.4861			1.32734	0.0470605	-1.44657	0.366892
H3BR35;P15170;H3BSV8;Q8IYD1	Eukaryotic peptide chain release factor GTP-binding subunit ERF3A	H3BR35;P15170	GSPT1	20.6285	19.79	21.1106	21.1143	23.2674	21.3982	21.0599	20.9454	20.6133			0.845934	0.142583	-1.41696	0.3745
C9JN15;E9PG73;Q13427;C9JT64;C9J679;C9JM79	Peptidyl-prolyl cis-trans isomerase;Peptidyl-prolyl cis-trans isomerase G	C9JN15;E9PG73;Q13427;C9JT64;C9J679;C9JM79	PPIG	19.1696	21.459	20.805	21.3507	22.2693	21.9776	21.0543	20.9329	21.0446			0.882318	0.131124	-1.38802	0.382089
Q3ZCQ8;M0R0C3;M0QXC3;M0R2Z3;M0R303;M0R2D2;M0R2F8;M0R047;M0R1Y4;M0R003	Mitochondrial import inner membrane translocase subunit TIM50	Q3ZCQ8	TIMM50	20.0537	19.7422	20.4671	21.2359	21.8862	21.2516	20.2864	20.036	19.9064			1.98821	0.0102752	-1.37022	0.386831
C9JP00;A0A0A0MQX8;Q9NR56;O95205;H7C4T5;Q5VZF2;C9JCX1;H7C4Y1;Q86VM6	Muscleblind-like protein 1;Muscleblind-like protein 2	C9JP00;A0A0A0MQX8;Q9NR56;O95205;H7C4T5;Q5VZF2	MBNL1;MBLL;MBNL2	23.5664	22.8388	22.8707	24.1084	24.7336	24.4717	22.2076	22.0958	22.0059			1.96771	0.010772	-1.34592	0.393403
Q9UPN7	Serine/threonine-protein phosphatase 6 regulatory subunit 1	Q9UPN7	PPP6R1	19.8734	20.8842	20.4198	23.0956	22.8113	19.2887	20.3497	20.5213	20.5106			0.459346	0.34726	-1.33937	0.395194
P48634	Protein PRRC2A	P48634	PRRC2A	23.7239	23.7182	24.0596	24.5977	25.5981	25.3212	21.3055	21.1942	21.3579			1.86249	0.0137251	-1.33846	0.395442
K7EJL1;Q9BXS5;E7ENJ6;K7EK69;K7ERH5;K7EL08;K7EQX3;Q9Y6Q5	AP-1 complex subunit mu-1	K7EJL1;Q9BXS5;E7ENJ6	AP1M1	19.2564	19.5031	19.4397	20.8388	20.9988	20.3705	20.928	20.0393	20.6425			2.56342	0.00273265	-1.33631	0.396032
A0A087WXZ3;Q9Y5A9;S4R3V3;S4R3J8;Q9BYJ9	YTH domain-containing family protein 2	A0A087WXZ3;Q9Y5A9;S4R3V3	YTHDF2	22.7227	22.331	22.5814	23.497	24.3312	23.7969	21.5392	19.5314	19.5619			2.10543	0.00784463	-1.32999	0.397771
P57088;D6RAA6;H0Y8N0	Transmembrane protein 33	P57088;D6RAA6;H0Y8N0	TMEM33	21.6935	22.044	21.3092	22.7274	23.1101	23.0778	21.676	21.7	21.7665			2.20466	0.00624229	-1.28953	0.409084
A0A0C4DFM1;Q92544;F8WCN2;F2Z2L1	Transmembrane 9 superfamily member 4	A0A0C4DFM1;Q92544	TM9SF4	19.0113	19.9451	20.0618	20.791	21.3191	20.7592	20.3053	20.0713	21.3339			1.55981	0.0275542	-1.28373	0.410733
Q9BQ52;G5E9D5;E7ES68;H7C2I4;V9GZ72	Zinc phosphodiesterase ELAC protein 2	Q9BQ52;G5E9D5;E7ES68	ELAC2	21.8631	20.4831	19.2317	21.9812	22.0253	21.383	19.8172	19.7135	20.0513			0.739861	0.182028	-1.27054	0.414505
E9PQ61;O75152;E9PBY7	Zinc finger CCCH domain-containing protein 11A	E9PQ61;O75152;E9PBY7	ZC3H11A	20.3605	21.0213	18.9039	20.8175	22.0453	21.2303	20.7731	21.3585	20.6308			0.813598	0.153604	-1.2692	0.414889
Q99797	Mitochondrial intermediate peptidase	Q99797	MIPEP	21.0018	18.8951	20.4219	21.6966	21.2831	21.1252	19.6871	20.6836	21.4238			0.904571	0.124575	-1.26202	0.41696
A0A0C4DG98;Q8NI27;H0Y815	THO complex subunit 2	A0A0C4DG98;Q8NI27	THOC2	19.8394	19.2512	19.5783	20.7985	20.9101	20.683	19.9042	19.9884	20.0158			2.6131	0.00243723	-1.24091	0.423107
C9J5N1;Q9BTE6;L7N2F4	Alanyl-tRNA editing protein Aarsd1	C9J5N1;Q9BTE6;L7N2F4	PTGES3L-AARSD1;AARSD1	21.5854	19.0401	20.6711	20.8352	21.8588	22.323	21.0217	20.8835	20.8371			0.648368	0.224715	-1.24018	0.423319
E9PK09;E9PQN2;E9PKI6;E9PK91;Q9NYF8;E9PJA7;H0YF00	Bcl-2-associated transcription factor 1	E9PK09;E9PQN2;E9PKI6;E9PK91;Q9NYF8	BCLAF1	22.7394	22.2887	21.2599	22.9973	23.4928	23.4382	20.4288	20.5602	21.9069			1.22564	0.0594786	-1.2134	0.431251
Q9HCE1;Q5JR04	Putative helicase MOV-10	Q9HCE1;Q5JR04	MOV10	26.66	26.5518	26.3851	27.2776	28.0734	27.871	21.6989	21.6449	21.7519			2.06245	0.00866057	-1.20837	0.432756
F8WDS9;E9PHS0;O43813	LanC-like protein 1	F8WDS9;E9PHS0;O43813	LANCL1	19.3245	19.079	20.3387	20.6416	20.9724	20.7189	18.8548	20.8882	21.1402			1.40088	0.0397305	-1.19694	0.436198
Q53HL2	Borealin	Q53HL2	CDCA8	19.7547	19.5701	21.534	22.142	22.2238	20.0767	21.005	19.3324	19.1954			0.56367	0.273105	-1.1946	0.436909
Q96KA5;G5E9Z2	Cleft lip and palate transmembrane protein 1-like protein	Q96KA5;G5E9Z2	CLPTM1L	20.021	20.0448	20.6215	21.1249	21.3777	21.7273	21.136	21.2977	20.9972			1.96372	0.0108712	-1.18088	0.441081
A5YKK6;H3BMZ2;H3BVC9	CCR4-NOT transcription complex subunit 1	A5YKK6;H3BMZ2	CNOT1	20.2748	19.4245	19.1857	20.2802	21.4622	20.6364	20.3852	20.1267	20.1544			1.13771	0.0728266	-1.16464	0.446077
Q9Y512	Sorting and assembly machinery component 50 homolog	Q9Y512	SAMM50	20.9001	20.3542	20.2837	21.1512	22.6342	21.1152	20.5834	21.4571	20.6821			0.978204	0.105147	-1.12088	0.459814
Q01650	Large neutral amino acids transporter small subunit 1	Q01650	SLC7A5	22.5991	19.5839	22.9408	22.6238	22.9629	22.8997	23.2487	23.3475	22.9253			0.450211	0.354641	-1.12084	0.459827
G5EA06;Q92552;D6RH20;D6RJC7	28S ribosomal protein S27, mitochondrial	G5EA06;Q92552;D6RH20	MRPS27	21.0321	19.7893	20.3216	22.9776	20.4303	21.0436	19.3675	19.8094	20.3924			0.579736	0.263187	-1.10286	0.465592
Q96N66	Lysophospholipid acyltransferase 7	Q96N66	MBOAT7	23.3577	22.821	22.62	23.5262	24.4118	24.1604	21.8605	22.2038	21.9952			1.48416	0.0327972	-1.09989	0.466551
Q14166;V9GY16	Tubulin--tyrosine ligase-like protein 12	Q14166	TTLL12	21.0913	19.4811	21.6032	21.8942	22.2479	21.31	21.6758	21.1109	21.3617			0.718141	0.191364	-1.09218	0.469053
J3QLE5;A8MT02;P63162;P14678;J3KRY3;S4R3P3	Small nuclear ribonucleoprotein-associated protein N;Small nuclear ribonucleoprotein-associated proteins B and B	J3QLE5;A8MT02;P63162;P14678	SNRPN;SNRPB	22.7298	22.6464	22.0606	23.5673	23.8698	23.264	22.5485	21.7753	22.6732			1.78355	0.0164609	-1.08811	0.470376
P53004;C9J1E1	Biliverdin reductase A	P53004	BLVRA	24.6869	20.3599	19.5634	19.246	24.7291	23.8415	23.5897	23.0411	23.1055			0.173898	0.670042	-1.0688	0.476716
P01876	Ig alpha-1 chain C region	P01876	IGHA1	25.0981	24.4259	23.5159	25.277	25.6555	25.2763	24.6947	23.5198	23.1583			1.04344	0.0904819	-1.05628	0.480871
Q9BPX3;H0Y9Z8;D6RA93	Condensin complex subunit 3	Q9BPX3;H0Y9Z8	NCAPG	19.9794	20.1331	20.0394	21.5238	21.6569	20.1317	20.6033	20.7804	20.9994			1.00934	0.0978722	-1.05352	0.481792
O00505;H0Y4S9;H7C4F6;O00629	Importin subunit alpha-4	O00505	KPNA3	19.7625	20.33	20.2457	21.7124	20.4035	21.3813	20.0525	20.2038	20.5799			1.14928	0.0709116	-1.05297	0.481977
Q13185;C9JMM0;B8ZZ43;S4R2Y4;K7ELA4;B5MD17;J3KS05;P83916	Chromobox protein homolog 3	Q13185	CBX3	20.952	20.5507	21.3843	20.5208	24.8981	20.5865	21.3749	19.9494	21.2164			0.285651	0.518023	-1.03945	0.486512
H0YDU8;P53041;A8MU39	Serine/threonine-protein phosphatase;Serine/threonine-protein phosphatase 5	H0YDU8;P53041	PPP5C	21.4996	18.3834	21.2188	19.7953	21.5221	22.8474	20.7295	20.8521	20.8241			0.31357	0.485769	-1.02098	0.492783
Q8WXF1;X6RDA4	Paraspeckle component 1	Q8WXF1;X6RDA4	PSPC1	20.6926	21.2592	20.9739	21.4411	23.4973	21.0105	20.9167	20.5145	20.8548			0.571362	0.268311	-1.00774	0.497324
A0A0B4J1Z1;C9JAB2;Q16629	Serine/arginine-rich splicing factor 7	A0A0B4J1Z1;C9JAB2;Q16629	SRSF7	24.3979	24.268	23.6362	24.822	25.3299	25.1719	24.2779	24.5892	24.178			1.64664	0.0225611	-1.00725	0.497495
Q13428;H0YA99	Treacle protein	Q13428	TCOF1	26.3188	25.8297	25.9086	26.8362	27.4428	26.7925	24.1104	23.6243	24.1602			1.74898	0.0178248	-1.00478	0.498345
Q15758;M0QXM4;M0QX44	Neutral amino acid transporter B(0);Amino acid transporter	Q15758;M0QXM4	SLC1A5	21.5767	19.7065	19.7612	21.3708	21.4449	21.2363	20.9516	20.4584	21.8401			0.745205	0.179802	-1.00254	0.499122
Q14683;G8JLG1;H0Y7K8;V9GYN9;V9GY57	Structural maintenance of chromosomes protein 1A;Structural maintenance of chromosomes protein	Q14683;G8JLG1	SMC1A	20.6246	20.762	19.7449	20.7809	22.5384	20.8105	21.6096	21.0201	21.6491			0.686199	0.205969	-0.999379	0.500215
P25311;C9JEV0	Zinc-alpha-2-glycoprotein	P25311;C9JEV0	AZGP1	22.2429	21.539	21.0018	22.5191	22.3691	22.8925	21.1026	24.4262	20.5287			1.19912	0.0632232	-0.999062	0.500325
Q9HCS7	Pre-mRNA-splicing factor SYF1	Q9HCS7	XAB2	21.051	19.3577	20.1214	20.8587	21.6847	20.9733	20.4906	20.5698	19.9116			0.834096	0.146522	-0.995559	0.501541
Q9UBF2	Coatomer subunit gamma-2	Q9UBF2	COPG2	21.2271	20.4741	20.1989	21.0503	22.2217	21.6101	20.14	19.9708	20.0954			1.02097	0.0952857	-0.993972	0.502094
O96008;K7EKG4;K7EJ57	Mitochondrial import receptor subunit TOM40 homolog	O96008;K7EKG4;K7EJ57	TOMM40	23.6492	24.007	23.6051	24.5947	25.2355	24.3655	23.5395	23.1912	23.3725			1.55428	0.0279075	-0.978083	0.507654
E9PLK3;P55786;H0YCQ5;H0YDG0;E9PP11;A6NEC2	Puromycin-sensitive aminopeptidase	E9PLK3;P55786	NPEPPS	19.8385	20.3619	20.0483	21.0709	22.0839	20.0177	20.3808	20.0109	20.1155			0.724583	0.188546	-0.974595	0.508883
Q8WWM7;H3BUF6;H3BSK9;H3BUE3;H3BRB0;A0A0C4DGL7;H3BSQ5	Ataxin-2-like protein	Q8WWM7;H3BUF6	ATXN2L	24.123	23.8819	24.0419	24.5308	25.3027	25.1192	22.2705	22.7346	22.5885			1.78524	0.0163969	-0.968597	0.511003
P23381;H0YJP3	Tryptophan--tRNA ligase, cytoplasmic;T1-TrpRS;T2-TrpRS	P23381;H0YJP3	WARS	19.1061	19.5245	21.4827	20.6899	20.2283	22.0813	21.0495	21.0156	20.9876			0.45004	0.354781	-0.962077	0.513317
J3KPM9;P42224;E7EPD2;D2KFR9	Signal transducer and activator of transcription;Signal transducer and activator of transcription 1-alpha/beta	J3KPM9;P42224	STAT1	19.896	21.3034	20.247	21.6843	21.6492	20.9865	20.4722	20.1609	20.5934			0.932951	0.116694	-0.957902	0.514805
A0A0A0MRA3;A0A0A0MTS7;Q8WZ42	Titin	A0A0A0MRA3;A0A0A0MTS7;Q8WZ42	TTN	22.6691	24.6186	20.8265	23.5847	23.5842	23.8101	20.7575	20.8549	20.0199			0.363186	0.433325	-0.954908	0.515874
Q15006;H0YAS9	ER membrane protein complex subunit 2	Q15006;H0YAS9	EMC2	19.8739	19.5989	20.2463	20.7526	21.178	20.6434	20.5866	20.7881	20.1675			1.72948	0.0186432	-0.951686	0.517028
F8W914;Q9NQC3;H7C106;A0A0U1RQR6	Reticulon;Reticulon-4	F8W914;Q9NQC3;H7C106	RTN4	22.0539	22.7593	23.0258	24.0086	22.9378	23.7081	23.3385	23.5001	23.822			1.02225	0.0950048	-0.938519	0.521768
S4R3H4;E7EQT4;Q9UKV3;G3V3B0;G3V3T3;A0A087WYN3	Apoptotic chromatin condensation inducer in the nucleus	S4R3H4;E7EQT4;Q9UKV3	ACIN1	23.2737	23.015	23.0731	23.8884	24.274	24.009	23.2032	23.2472	23.5505			2.60573	0.00247894	-0.936529	0.522489
Q9UQ35;I3L182;I3L4D8;I3L3Q8;I3L1I8;I3L1C0;A0A087X1W1	Serine/arginine repetitive matrix protein 2	Q9UQ35	SRRM2	26.7831	26.4352	26.0892	26.8819	27.6355	27.5965	25.9323	25.8313	26.0564			1.37988	0.0416986	-0.935476	0.52287
P50995;H0Y6E1	Annexin A11	P50995	ANXA11	20.876	20.7598	19.9232	20.7077	22.2819	21.3498	20.8633	20.4777	20.2334			0.781752	0.165291	-0.926818	0.526017
G5E975;Q12824;A0A0U1RQQ2;A0A0U1RRB8;C9JTA6;A0A0G2JSE9;B5MCL5	SWI/SNF-related matrix-associated actin-dependent regulator of chromatin subfamily B member 1	G5E975;Q12824;A0A0U1RQQ2;A0A0U1RRB8;C9JTA6;A0A0G2JSE9;B5MCL5	SMARCB1	20.0996	20.5361	21.021	20.7229	21.014	22.683	21.1688	20.7912	21.1903			0.621743	0.238922	-0.921062	0.52812
P22531;Q96RM1	Small proline-rich protein 2E;Small proline-rich protein 2F	P22531;Q96RM1	SPRR2E;SPRR2F	24.5446	23.4138	22.1217	23.8203	24.75	24.2537	22.7558	23.1962	21.7223			0.538396	0.28947	-0.914635	0.530478
H7C3S9;E9PGT6;Q99627	COP9 signalosome complex subunit 8	H7C3S9;E9PGT6;Q99627	COPS8	19.7822	20.0235	20.4909	19.9114	21.2658	21.8534	19.9727	20.0226	20.1009			0.677046	0.210356	-0.91136	0.531683
E7EQB2;E7ER44;TRFL_HUMAN;P02788;C9JCF5	Lactotransferrin;Lactoferricin-H;Kaliocin-1;Lactoferroxin-A;Lactoferroxin-B;Lactoferroxin-C	E7EQB2;E7ER44;TRFL_HUMAN;P02788	LTF	23.2202	23.2043	22.5405	23.9328	23.9952	23.7546	22.8881	22.2044	21.6679			1.73759	0.0182982	-0.905899	0.5337
P18583;H7C1M2;H7C2G8;J3QSZ5	Protein SON	P18583	SON	23.5328	23.5902	22.822	23.7978	24.4322	24.4317	22.7502	22.641	23.0258			1.30485	0.0495625	-0.905524	0.533839
P20073	Annexin A7	P20073	ANXA7	20.423	18.9925	20.4016	20.4195	21.8812	20.2183	20.8051	20.1183	20.7929			0.566777	0.271158	-0.900664	0.53564
O15145;F8VR50;C9JZD1	Actin-related protein 2/3 complex subunit 3	O15145;F8VR50;C9JZD1	ARPC3	19.5232	19.5654	21.2816	21.6898	20.8544	20.4054	19.8127	20.541	19.8164			0.551026	0.281173	-0.859795	0.551031
Q92973;A0A075B780;O14787;E7EW37;S4R398;K7ENW1;K7ESC1	Transportin-1	Q92973	TNPO1	22.4435	22.2981	22.2547	22.972	23.0332	23.5476	23.0614	23.1516	23.2598			1.95094	0.011196	-0.852126	0.553968
A0A096LNJ1;A0A096LP73;F2Z2Q0;A0A096LP12;A0A0B4J2H4;H7C1F6;A0A0B4J2D5;A0A096LPI6;P30042;A0A096LNH5;H7C2G3	ES1 protein homolog, mitochondrial	A0A096LNJ1;A0A096LP73;F2Z2Q0;A0A096LP12;A0A0B4J2H4;H7C1F6;A0A0B4J2D5;A0A096LPI6;P30042;A0A096LNH5;H7C2G3	C21orf33	19.9015	19.5483	21.0452	20.2801	21.4907	21.2736	19.5475	19.1523	20.8881			0.656841	0.220373	-0.849805	0.55486
B4DY09;Q12905;X6R6Z1;A0A0A0MRL0	Interleukin enhancer-binding factor 2	B4DY09;Q12905;X6R6Z1	ILF2	26.3302	26.3704	26.0133	26.7468	27.4133	27.1014	24.9663	24.8393	25.0293			1.72051	0.0190321	-0.849173	0.555103
Q12906;K7EQR9;K7EKJ9;K7ERM6;K7ENK6;K7EM82;K7EJ09;K7ER69;K7ELV3	Interleukin enhancer-binding factor 3	Q12906	ILF3	26.6822	26.2522	26.229	26.9123	27.4852	27.3091	24.895	24.9388	25.1075			1.70968	0.0195129	-0.847781	0.555639
A0A0A0MTB8;Q8NI36	WD repeat-containing protein 36	A0A0A0MTB8;Q8NI36	WDR36	20.2573	20.855	20.066	20.9644	22.1804	20.5627	21.5892	21.0891	21.1401			0.711478	0.194322	-0.843079	0.557453
Q96SI9	Spermatid perinuclear RNA-binding protein	Q96SI9	STRBP	21.8693	21.5684	21.2455	21.9691	22.0756	23.1603	19.5929	20.784	21.1338			0.93331	0.116598	-0.840572	0.558422
P45973;F8VNY3	Chromobox protein homolog 5	P45973	CBX5	21.0321	19.9204	20.319	19.6985	22.8275	21.2519	20.2985	20.2747	20.5894			0.363207	0.433304	-0.835405	0.560426
Q13247;A0A0D9SEM4;Q08170;A0A0D9SGD2	Serine/arginine-rich splicing factor 6	Q13247	SRSF6	24.3148	24.5133	23.7927	24.6674	25.2357	25.2228	23.6449	23.4344	23.6268			1.36804	0.0428511	-0.835051	0.560563
P04844;Q5JYR4;Q5JYR7;Q5JYR3;H0Y5M1	Dolichyl-diphosphooligosaccharide--protein glycosyltransferase subunit 2	P04844	RPN2	26.1646	25.6991	25.8432	26.7563	26.9311	26.5193	25.6407	25.6954	25.7824			1.99039	0.0102237	-0.83326	0.561259
P09669	Cytochrome c oxidase subunit 6C	P09669	COX6C	19.7849	19.2297	21.2701	20.508	21.621	20.6542	20.6373	21.2152	21.1617			0.52121	0.301155	-0.832856	0.561417
Q7Z6E9;I3L3Y2;H3BUN0;H3BSK8	E3 ubiquitin-protein ligase RBBP6	Q7Z6E9	RBBP6	22.24	22.8838	22.4116	23.2804	23.2322	23.5164	22.0206	21.7709	21.2159			1.76639	0.017124	-0.831202	0.562061
Q9NVN8	Guanine nucleotide-binding protein-like 3-like protein	Q9NVN8	GNL3L	19.9727	19.8922	19.8975	21.1097	21.3084	19.8369	19.9875	19.8618	19.7708			0.834711	0.146315	-0.830887	0.562184
A0A087WUT6;O60841	Eukaryotic translation initiation factor 5B	A0A087WUT6;O60841	EIF5B	22.5302	22.5503	21.9862	23.3052	23.5051	22.7465	22.6854	22.5204	22.6045			1.32734	0.0470605	-0.830034	0.562516
Q92922	SWI/SNF complex subunit SMARCC1	Q92922	SMARCC1	20.8704	21.2755	21.0303	20.1294	23.7938	21.7122	21.5184	21.6806	21.7657			0.313877	0.485426	-0.81971	0.566556
Q8NC56;D6RBV0;H0Y9B7	LEM domain-containing protein 2	Q8NC56;D6RBV0	LEMD2	18.8152	20.7569	21.1532	21.1502	21.9936	20.036	19.7503	21.0073	21.6553			0.373358	0.423294	-0.818176	0.567158
Q9UKX7;B0QY21	Nuclear pore complex protein Nup50	Q9UKX7	NUP50	20.9812	20.2578	21.2446	20.8358	22.9578	21.1443	21.6822	21.2694	22.229			0.492055	0.322066	-0.818089	0.567193
B5MDE0;Q96AA3	Protein RFT1 homolog	B5MDE0;Q96AA3	RFT1	20.9296	20.8651	20.5283	21.3856	22.1159	21.2646	20.9409	20.8909	21.2028			1.29986	0.050135	-0.814339	0.568669
B9ZVT1;Q8IXT5	RNA-binding protein 12B	B9ZVT1;Q8IXT5	RBM12B	21.3627	21.6015	20.1333	21.1808	22.3254	22.0267	19.6909	19.9601	21.062			0.64361	0.22719	-0.81181	0.569667
C9JTN7;F8W8I6;Q01085;P31483;F8WE16;E7ETC0;E5RGV5;E5RG67	Nucleolysin TIAR;Nucleolysin TIA-1 isoform p40	C9JTN7;F8W8I6;Q01085;P31483;F8WE16;E7ETC0;E5RGV5;E5RG67	TIA1;TIAL1	17.6939	20.1685	20.512	20.2754	20.7622	19.743	20.0714	19.7207	19.5927			0.357107	0.439433	-0.802085	0.57352
O95466;K7EJE6;A0A0A0MR62;K7EK60;Q96PY5	Formin-like protein 1	O95466;K7EJE6;A0A0A0MR62;K7EK60	FMNL1	20.3796	19.7306	19.8635	20.0036	20.922	21.4357	20.5233	20.588	21.0033			0.793321	0.160946	-0.795908	0.575981
M0QXF7;M0QYN0;Q969H8	Myeloid-derived growth factor	M0QXF7;M0QYN0;Q969H8	MYDGF	21.6132	22.1391	21.8279	22.6787	22.9236	22.3501	21.6978	21.4382	21.7019			1.60575	0.0247886	-0.790717	0.578057
Q15424;K7ES42	Scaffold attachment factor B1	Q15424	SAFB	24.8531	24.8254	24.8307	25.1956	25.9362	25.7405	23.6467	23.834	24.0278			1.62436	0.0237487	-0.787714	0.579261
F5H1S8;Q14165;H0YG07;F5GX14	Malectin	F5H1S8;Q14165;H0YG07;F5GX14	MLEC	24.3086	23.9881	23.5042	24.4172	24.9611	24.7856	24.0054	24.2401	23.8872			1.30212	0.0498748	-0.78766	0.579283
P16401	Histone H1.5	P16401	HIST1H1B	30.2468	29.9765	29.3814	30.378	31.0175	30.5505	29.2543	29.1947	29.3864			1.15011	0.0707761	-0.780434	0.582192
P10412	Histone H1.4	P10412	HIST1H1E	30.3548	29.4385	29.1711	30.122	30.7162	30.4174	27.968	28.0984	28.5859			0.896335	0.126959	-0.763739	0.588968
G3V325;C9JJT5;C9JU26;P56134;O75127		G3V325;C9JJT5	ATP5J2-PTCD1	20.4308	20.6831	19.6439	20.5558	20.6075	21.8749	19.1877	20.4744	20.1667			0.644133	0.226917	-0.760124	0.590446
A0A0C4DGZ0;A0A087WWE2;P24928	DNA-directed RNA polymerase;DNA-directed RNA polymerase II subunit RPB1	A0A0C4DGZ0;A0A087WWE2;P24928	POLR2A	21.6096	19.0019	20.9331	21.0241	21.4439	21.3364	21.0333	21.1362	19.848			0.403325	0.395071	-0.753283	0.593252
P50402;Q5HY57	Emerin	P50402;Q5HY57	EMD	19.4772	20.1375	20.2186	20.5284	20.9358	20.627	20.5327	21.0287	21.1444			1.32954	0.0468234	-0.752621	0.593524
C9J8Q5;P51649	Succinate-semialdehyde dehydrogenase, mitochondrial	C9J8Q5;P51649	ALDH5A1	20.9828	19.5897	20.9156	20.8182	22.095	20.8326	21.2149	21.0123	21.0732			0.53488	0.291823	-0.75256	0.59355
K7ES31;K7ERF1;Q9UBQ5	Eukaryotic translation initiation factor 3 subunit K	K7ES31;K7ERF1;Q9UBQ5	EIF3K	20.0994	20.1983	20.1951	20.451	20.3258	21.9653	20.3982	20.6086	20.4999			0.641039	0.22854	-0.749757	0.594704
A0A0A0MS07;A0A0A0MS08;A0A087X1C7;A0A0G2JNK4;A0A087WV47;A0A087X079;A0A087WYC5;P01857	Ig gamma-1 chain C region	A0A0A0MS07;A0A0A0MS08;A0A087X1C7;A0A0G2JNK4;A0A087WV47;A0A087X079;A0A087WYC5;P01857	IGHG1	23.6889	23.5432	23.0724	23.9401	24.4843	24.1116	24.4366	22.8614	21.9878			1.40978	0.0389243	-0.743863	0.597138
F5H669;Q8N684;J3QT54;F5H6M0;F5H047;C9JM38;C9J286;C9J323	Cleavage and polyadenylation specificity factor subunit 7	F5H669;Q8N684;J3QT54;F5H6M0;F5H047	CPSF7	20.1016	19.7702	20.0808	21.7013	20.0052	20.4654	20.6254	20.7543	21.5538			0.645522	0.226192	-0.739704	0.598862
A0A0J9YWL0;Q9Y4K1;Q96QW7	Absent in melanoma 1 protein	A0A0J9YWL0;Q9Y4K1;Q96QW7	AIM1	20.1433	21.3575	20.0373	21.7902	20.9716	20.9641	20.1609	21.7226	20.2934			0.653998	0.221821	-0.729252	0.603217
P48147	Prolyl endopeptidase	P48147	PREP	19.8677	20.1923	20.6042	20.1451	22.2385	20.4466	21.1221	20.1689	21.1666			0.452529	0.352753	-0.721991	0.60626
E9PKP7;P17480;E9PMM2;E9PLT2	Nucleolar transcription factor 1	E9PKP7;P17480	UBTF	21.9893	22.0361	21.7607	21.7634	23.0296	23.1464	21.8955	22.0878	22.3761			0.728913	0.186675	-0.71774	0.608049
D6RCD0;Q8NBQ5	Estradiol 17-beta-dehydrogenase 11	D6RCD0;Q8NBQ5	HSD17B11	21.0607	20.4243	19.9673	20.6448	20.8103	22.1462	20.5328	20.4912	20.4989			0.555673	0.278181	-0.716355	0.608633
P16403;Q02539	Histone H1.2	P16403	HIST1H1C	29.1646	27.8929	26.3153	28.1398	29.2874	28.081	27.0709	26.9126	26.8251			0.319557	0.479119	-0.711786	0.610564
P22735;H0YMQ8;H0YN27;H0YLT9	Protein-glutamine gamma-glutamyltransferase K	P22735	TGM1	24.3026	24.0699	23.7895	24.8421	24.9605	24.488	23.9061	23.4144	23.6171			1.58658	0.0259074	-0.709544	0.611513
O14828	Secretory carrier-associated membrane protein 3	O14828	SCAMP3	23.8092	24.1815	23.276	24.3165	24.586	24.4858	23.5933	23.3585	24.0044			1.21165	0.0614256	-0.707239	0.612491
P81605	Dermcidin;Survival-promoting peptide;DCD-1	P81605	DCD	24.4125	23.1019	22.1645	24.0799	24.2335	23.4598	23.7412	22.5	22.1638			0.430545	0.37107	-0.698071	0.616396
K7ER90;K7EL20;O75821;K7ENA8;K7EL60;K7EP16	Eukaryotic translation initiation factor 3 subunit G	K7ER90;K7EL20;O75821;K7ENA8	EIF3G	21.4671	17.3048	20.7621	20.7743	21.1371	19.6995	20.4201	20.6913	21.0681			0.196071	0.636691	-0.692321	0.618858
P12273	Prolactin-inducible protein	P12273	PIP	22.2673	21.9265	21.4083	22.6645	22.3749	22.6367	21.5562	22.2997	21.3505			1.22007	0.0602466	-0.691322	0.619286
B4DHE8;Q96DH6;J3KTC1;B4DM51;J3QKT5	RNA-binding protein Musashi homolog 2	B4DHE8;Q96DH6;J3KTC1;B4DM51	MSI2	20.7691	20.9159	20.921	21.228	21.8883	21.5622	20.1964	20.1543	20.2601			1.60637	0.0247532	-0.690842	0.619492
E7EMM4;Q13510	Acid ceramidase;Acid ceramidase subunit alpha;Acid ceramidase subunit beta	E7EMM4;Q13510	ASAH1	21.9674	21.8467	21.1258	22.3974	22.4359	22.1748	21.7303	21.3545	21.5178			1.17845	0.0663054	-0.689433	0.620098
J3KTL2;Q07955;J3KSR8;J3QQV5;J3KSW7	Serine/arginine-rich splicing factor 1	J3KTL2;Q07955	SRSF1	25.1531	25.0935	24.8031	25.4735	25.7608	25.8774	25.0486	24.8931	25.0265			1.88268	0.0131014	-0.687368	0.620986
P62314;J3QLR7;J3QLI9	Small nuclear ribonucleoprotein Sm D1	P62314	SNRPD1	23.2968	24.0415	23.2206	24.2554	24.2312	24.126	24.4788	23.8089	24.4751			1.21446	0.0610291	-0.684545	0.622202
Q08188	Protein-glutamine gamma-glutamyltransferase E;Protein-glutamine gamma-glutamyltransferase E 50 kDa catalytic chain;Protein-glutamine gamma-glutamyltransferase E 27 kDa non-catalytic chain	Q08188	TGM3	24.7467	24.2101	23.8106	24.9285	25.2113	24.6741	23.8936	23.1015	23.242			1.02507	0.0943903	-0.682138	0.623241
A0A087X1A5;Q5JW30;O95793;Q5JW28	Double-stranded RNA-binding protein Staufen homolog 1	A0A087X1A5;Q5JW30;O95793;Q5JW28	STAU1	20.5297	20.2883	19.6038	20.292	20.6917	21.4841	20.3606	20.2333	20.2765			0.695558	0.201578	-0.682009	0.623297
P16402	Histone H1.3	P16402	HIST1H1D	31.1766	30.7469	30.6732	31.2781	31.8887	31.4756	29.7711	29.7474	29.9617			1.33616	0.0461151	-0.681882	0.623352
J3QT28;O43684;J3QSX4	Mitotic checkpoint protein BUB3	J3QT28;O43684;J3QSX4	BUB3	24.4032	24.0839	23.8006	24.4131	25.239	24.6739	23.3728	23.6182	23.663			1.06605	0.0858918	-0.679426	0.624414
P07476	Involucrin	P07476	IVL	21.5594	19.3013	19.0816	19.9698	21.0965	20.912	22.3536	18.5763	21.5615			0.321735	0.476722	-0.678654	0.624748
P31025;Q5VSP4	Lipocalin-1;Putative lipocalin 1-like protein 1	P31025;Q5VSP4	LCN1;LCN1P1	23.1906	23.3797	22.8867	24.0621	24.0897	23.3354	22.5843	22.5065	21.9561			1.11398	0.076916	-0.676709	0.62559
Q8TC12;G3V2G6;G3V234;H0YJ10;H0YIZ8;H0YJ46	Retinol dehydrogenase 11	Q8TC12;G3V2G6;G3V234	RDH11	20.0456	21.0808	21.4747	21.8268	21.0031	21.7926	22.0399	21.9458	22.1631			0.5983	0.252174	-0.673834	0.626838
A0A0B4J210;Q6PKG0;E5RH50;H0YC33;H0YBW1;H0YAX9;H0YBJ5;H0YBM7;H0YC73	La-related protein 1	A0A0B4J210;Q6PKG0;E5RH50	LARP1	23.1904	22.9125	22.0676	22.9647	23.6398	23.586	22.901	22.9678	22.9161			0.773245	0.16856	-0.673295	0.627073
A0A087X2D0;P84103	Serine/arginine-rich splicing factor 3	A0A087X2D0;P84103	SRSF3	24.0551	24.0796	24.221	24.5759	25.013	24.784	23.9555	23.9124	24.0569			2.10385	0.0078732	-0.672384	0.627469
E5RIW3;E5RJD8;O75347;E5RHG6;E5RIX8	Tubulin-specific chaperone A	E5RIW3;E5RJD8;O75347;E5RHG6	TBCA	20.6193	19.958	20.5999	21.0431	21.6778	20.4606	21.097	20.5827	21.2257			0.741793	0.181221	-0.668138	0.629318
O60231;Q5SQH5;A0A140T8Y5;A0A140T947;A0A140T9T4	Putative pre-mRNA-splicing factor ATP-dependent RNA helicase DHX16	O60231;Q5SQH5;A0A140T8Y5;A0A140T947	DHX16	19.6635	19.4883	19.3369	19.5162	21.4694	19.5015	21.8927	19.7056	20.5761			0.431676	0.370105	-0.66615	0.630186
LYSC_HUMAN;P61626;F8VV32;A0A0B4J259	Lysozyme C;Lysozyme	LYSC_HUMAN;P61626;F8VV32;A0A0B4J259	LYZ	24.5902	24.9182	23.16	25.2359	24.7406	24.6839	24.1592	23.5562	23.0811			0.512931	0.306951	-0.664015	0.631119
Q9NTZ6;A6PVI1;A6PVI0;Q5JX62	RNA-binding protein 12	Q9NTZ6	RBM12	20.7792	19.8506	19.7371	20.6963	20.8786	20.7812	20.5654	20.4439	20.4529			0.92708	0.118282	-0.663052	0.631541
B7Z524;H0YDX7;J3QT46;Q9Y450;H0YES5;E9PHZ9;E9PS53	HBS1-like protein	B7Z524;H0YDX7;J3QT46;Q9Y450;H0YES5;E9PHZ9	HBS1L	21.3912	19.9915	20.3039	20.7579	20.5431	22.3598	20.4806	20.3775	20.5058			0.38905	0.408272	-0.658098	0.633713
O94874	E3 UFM1-protein ligase 1	O94874	UFL1	20.2621	20.0847	20.3758	20.5678	21.8448	20.2391	20.752	20.5117	20.7126			0.576139	0.265375	-0.643033	0.640365
P55060	Exportin-2	P55060	CSE1L	25.507	25.2406	25.1291	25.3939	26.4757	25.9355	25.9804	26.2039	26.1748			0.903926	0.12476	-0.64278	0.640478
Q9HD20;H7C3H2	Manganese-transporting ATPase 13A1	Q9HD20	ATP13A1	21.9096	22.0983	22.105	22.492	22.7532	22.793	22.4727	22.2415	22.2608			2.30907	0.00490824	-0.641767	0.640928
P16989;A0A0D9SEI8	Y-box-binding protein 3	P16989	YBX3	25.2739	25.347	24.8202	25.5794	25.917	25.8641	23.1708	23.7891	23.6569			1.51397	0.0306215	-0.639753	0.641823
O75533;B4DGZ4;H7C341;F8WC19	Splicing factor 3B subunit 1	O75533	SF3B1	23.1515	22.7353	22.3555	23.5088	23.2322	23.3936	23.5287	23.493	23.1439			1.21721	0.0606438	-0.630756	0.645838
O15371;B0QYA5;B0QYA6;B0QYA4;B0QYA8	Eukaryotic translation initiation factor 3 subunit D	O15371;B0QYA5	EIF3D	20.9373	21.119	21.6067	21.5264	20.9366	23.0905	21.5715	21.7967	21.171			0.395675	0.402091	-0.630174	0.646098
A0A0A0MR02;P45880;Q5JSD2;Q5JSD1;A2A3S1	Voltage-dependent anion-selective channel protein 2	A0A0A0MR02;P45880;Q5JSD2;Q5JSD1	VDAC2	26.4112	26.7464	26.4605	27.1032	27.4375	26.9654	26.4985	26.5985	26.5891			1.64296	0.022753	-0.62932	0.646481
Q9NZ01;M0R3C3;M0QXM3	Very-long-chain enoyl-CoA reductase	Q9NZ01;M0R3C3;M0QXM3	TECR	19.2307	20.617	21.4193	21.0056	21.0784	21.0664	20.3468	20.2996	20.3005			0.418035	0.381914	-0.627814	0.647156
E9PQS1;A0A087WT99;Q9H0W9;E9PR95;E9PSC3;E9PLC5;E9PLB3;E9PIP1;E9PPB5;E9PJU8	Ester hydrolase C11orf54	E9PQS1;A0A087WT99;Q9H0W9;E9PR95;E9PSC3;E9PLC5;E9PLB3;E9PIP1;E9PPB5;E9PJU8	C11orf54	19.6746	19.1867	19.3741	20.0688	19.9887	20.0563	19.6786	19.8169	19.2404			1.91182	0.0122512	-0.626147	0.647904
Q969V3;K7EMW4;K7ELZ9;K7ENM2;A0A0C4DGP7;K7EQ66	Nicalin	Q969V3;K7EMW4	NCLN	21.3285	21.2862	21.2467	21.844	22.3346	21.5461	22.1705	22.5723	22.7301			1.26127	0.0547937	-0.621066	0.65019
P62316;K7ERG4;K7EJB5	Small nuclear ribonucleoprotein Sm D2	P62316;K7ERG4	SNRPD2	23.9336	23.1849	23.8606	24.2235	24.0919	24.5193	23.2744	23.3635	23.2636			1.07789	0.0835806	-0.618556	0.651322
Q9UHD1;E9PIZ4;E9PSD5;E9PPQ5;E9PL00;E9PHZ2;E9PIF7	Cysteine and histidine-rich domain-containing protein 1	Q9UHD1;E9PIZ4;E9PSD5;E9PPQ5	CHORDC1	21.9975	22.7284	21.9479	22.9511	23.1515	22.4245	22.4283	22.2757	22.3173			0.863678	0.136874	-0.617764	0.65168
H0Y512;Q9HDC9	Adipocyte plasma membrane-associated protein	H0Y512;Q9HDC9	APMAP	20.6457	20.2273	21.965	20.8561	21.9292	21.9025	21.5082	21.6378	22.9793			0.415363	0.38427	-0.616608	0.652202
E9PKD5;E9PM69;R4GNH3;P17980;E9PN50;E9PMD8;E9PLG2	26S protease regulatory subunit 6A	E9PKD5;E9PM69;R4GNH3;P17980;E9PN50;E9PMD8	PSMC3	20.9881	19.5465	19.8935	20.2457	22.1056	19.9149	19.4707	19.6525	19.9721			0.309147	0.490741	-0.612687	0.653978
Q5T750	Skin-specific protein 32	Q5T750	XP32	26.9122	26.3973	26.0684	26.8548	27.5031	26.8573	25.8199	25.3796	26.4341			0.872273	0.134192	-0.612459	0.654081
A0A0R4J2E8;A8MXP9;P43243;D6REM6;D6R991;H0Y8T4;B3KM87;D6RAM9;D6RAY2;D6R8Z5;D6RBI2;D6RBK5;D6RE02;D6RIA2;Q68E03;D6RB45;D6R9F3;D6RBS2;D6RCM3;D6REK4	Matrin-3	A0A0R4J2E8;A8MXP9;P43243;D6REM6;D6R991	MATR3	24.0926	23.8454	24.0521	24.5674	24.5549	24.6862	24.2485	24.0952	24.2584			2.64686	0.00225498	-0.606145	0.65695
Q9NQG5;A2A2M0	Regulation of nuclear pre-mRNA domain-containing protein 1B	Q9NQG5;A2A2M0	RPRD1B	21.1062	21.2451	19.9323	21.3686	21.3737	21.348	21.6443	21.5141	21.6777			0.654263	0.221685	-0.602245	0.658728
J3KPH2;Q9BYJ1	Hydroperoxide isomerase ALOXE3	J3KPH2;Q9BYJ1	ALOXE3	22.494	22.7667	21.8804	23.1134	23.3243	22.4882	22.1859	21.6248	22.043			0.753294	0.176484	-0.594949	0.662068
Q9UBM7;E9PJ54;E9PM00;E9PRL8;E9PQ71;E9PIP9;E9PLZ2;H0YE57	7-dehydrocholesterol reductase	Q9UBM7;E9PJ54;E9PM00	DHCR7	21.6928	20.6243	21.6457	21.4507	22.1514	22.1369	20.9628	21.9469	22.346			0.63857	0.229843	-0.592091	0.663381
D6RGW0;Q6P179	Endoplasmic reticulum aminopeptidase 2	D6RGW0;Q6P179	ERAP2	20.6168	20.1673	19.8123	21.7977	20.2625	20.3046	21.5367	20.79	19.1476			0.457455	0.348775	-0.589465	0.664589
Q9HAV7	GrpE protein homolog 1, mitochondrial	Q9HAV7	GRPEL1	19.0761	19.436	21.0533	19.4153	20.0222	21.8956	19.6414	19.9127	20.0124			0.241384	0.573609	-0.589233	0.664696
B4E1G1;Q9BUN8;E5RGY0	Derlin-1	B4E1G1;Q9BUN8;E5RGY0	DERL1	21.6651	21.6726	21.7852	20.8942	23.7431	22.2347	21.2225	21.0287	21.2248			0.285558	0.518134	-0.58308	0.667537
Q9Y6C9;E9PIE4	Mitochondrial carrier homolog 2	Q9Y6C9;E9PIE4	MTCH2	20.8957	19.1505	21.4812	21.2354	20.7382	21.2987	21.7229	21.5629	21.1818			0.33186	0.465736	-0.581588	0.668228
O75223;M0QZK8;B8ZZK2;H7BZK5;A0A0B4J1Y4	Gamma-glutamylcyclotransferase	O75223;M0QZK8;B8ZZK2;H7BZK5	GGCT	23.1058	23.0616	22.9938	23.9172	23.8839	23.101	21.8352	21.6809	22.4817			1.01375	0.0968837	-0.580336	0.668808
A0A0A0MRV0;Q9P2E9;F8W7S5;A0A087WVV2;A0A087WU26;A2A2S5;H0YDJ4;H9KV85;E9PN67;C9J066;Q8N4C6	Ribosome-binding protein 1	A0A0A0MRV0;Q9P2E9;F8W7S5;A0A087WVV2	RRBP1	23.6694	23.2678	21.8136	23.3932	23.6471	23.4406	22.3028	22.3606	21.9924			0.433953	0.368169	-0.576731	0.670481
P38606;C9JA17;C9JVW8	V-type proton ATPase catalytic subunit A	P38606	ATP6V1A	20.9546	21.4013	21.5539	21.1258	23.5237	20.9862	21.4758	21.9229	21.4935			0.273752	0.532412	-0.575298	0.671147
Q93084;H3BTW4	Sarcoplasmic/endoplasmic reticulum calcium ATPase 3	Q93084	ATP2A3	21.0122	20.6897	19.2883	20.8576	20.9382	20.9133	20.7035	20.7465	21.5011			0.468236	0.340223	-0.572958	0.672237
Q10713	Mitochondrial-processing peptidase subunit alpha	Q10713	PMPCA	20.4937	18.6899	19.6498	20.1233	20.588	19.8271	18.5375	18.4958	20.8212			0.42915	0.372263	-0.568333	0.674396
E7EVA0;P27816;H7C456;H0Y2V1;H7C4C5;F8W9U4;A0A0J9YVV8;A0A0J9YW37;B5MEG9	Microtubule-associated protein;Microtubule-associated protein 4	E7EVA0;P27816	MAP4	23.2111	22.9485	22.5386	23.1728	23.6812	23.5425	22.258	22.3812	22.5028			1.07457	0.0842224	-0.566079	0.67545
Q9NTI5;A9IYQ1	Sister chromatid cohesion protein PDS5 homolog B	Q9NTI5	PDS5B	22.1068	21.067	19.2308	21.3423	22.182	20.5735	21.0122	21.1352	21.2915			0.230334	0.588391	-0.564391	0.676241
J3KPP4;O95232;D6RDI2	Luc7-like protein 3	J3KPP4;O95232;D6RDI2	LUC7L3	23.2678	23.2438	22.6424	23.5262	23.7476	23.571	23.1415	23.118	22.8414			1.22867	0.0590656	-0.563567	0.676627
P67775;P62714;H0YBN9;H0YC23	Serine/threonine-protein phosphatase 2A catalytic subunit alpha isoform;Serine/threonine-protein phosphatase 2A catalytic subunit beta isoform	P67775;P62714;H0YBN9;H0YC23	PPP2CA;PPP2CB	20.1051	19.4211	20.226	19.7668	19.4219	22.2513	20.3499	20.0058	20.2312			0.239437	0.576187	-0.562613	0.677075
Q8WUM0	Nuclear pore complex protein Nup133	Q8WUM0	NUP133	20.7628	19.9314	19.7345	19.6456	22.561	19.9049	20.3183	20.0952	20.345			0.222627	0.598926	-0.560956	0.677853
P62318;H3BT13	Small nuclear ribonucleoprotein Sm D3	P62318	SNRPD3	24.3741	24.5249	23.7503	24.9306	24.5222	24.8729	23.9677	23.9484	24.0951			0.972395	0.106563	-0.558825	0.678855
P61009	Signal peptidase complex subunit 3	P61009	SPCS3	20.01	20.4388	21.4487	20.0371	21.3382	22.1968	20.9365	21.1115	20.7386			0.298553	0.50286	-0.558159	0.679168
I3L2B0;K7EIG1;O75153;I3L318	Clustered mitochondria protein homolog	I3L2B0;K7EIG1;O75153	CLUH	20.4096	21.3324	19.2989	20.2506	21.3883	21.0509	21.5444	20.5821	20.6624			0.334514	0.462899	-0.54964	0.683191
P32942;K7EQC7;K7EP52;K7ERN2	Intercellular adhesion molecule 3	P32942;K7EQC7;K7EP52;K7ERN2	ICAM3	19.7345	19.1505	21.094	20.5477	20.5494	20.5064	20.9135	20.6513	21.1583			0.39759	0.400322	-0.541485	0.687063
P05204;A0A087WZE9;Q15651	Non-histone chromosomal protein HMG-17;High mobility group nucleosome-binding domain-containing protein 3	P05204;A0A087WZE9;Q15651	HMGN2;HMGN3	21.8399	19.725	20.2259	21.1892	21.348	20.8714	19.9657	19.5608	21.6147			0.341523	0.455488	-0.539265	0.688122
B3KS98;O15372;A0A087WZK9;E5RFW7;E5RFH0	Eukaryotic translation initiation factor 3 subunit H	B3KS98;O15372;A0A087WZK9	EIF3H	20.9007	20.8106	21.0801	20.9695	21.0326	22.4016	20.8239	21.548	21.9509			0.4947	0.320111	-0.537425	0.688999
Q96I24	Far upstream element-binding protein 3	Q96I24	FUBP3	22.0058	21.9693	22.026	22.5141	22.1181	22.9801	21.6442	21.4992	21.8346			1.0094	0.0978578	-0.537029	0.689189
Q5T760;Q05519;B4DWT1;Q5T757	Serine/arginine-rich splicing factor 11	Q5T760;Q05519	SRSF11	23.1096	22.7202	22.4028	22.7086	23.7005	23.43	22.7663	23.1128	23.0516			0.676059	0.210834	-0.535493	0.689923
F2Z2W6;F2Z2Y5;H7BXJ5;P05114	Non-histone chromosomal protein HMG-14	F2Z2W6;F2Z2Y5;H7BXJ5;P05114	HMGN1	21.3337	19.5989	20.5529	20.6751	21.2312	21.1825	19.1672	19.0253	19.0337			0.4293	0.372134	-0.534407	0.690442
Q58FF8	Putative heat shock protein HSP 90-beta 2	Q58FF8	HSP90AB2P	20.3687	20.1619	20.4808	20.2653	20.1589	22.1881	19.8978	20.025	19.2643			0.329923	0.467818	-0.533689	0.690786
H3BPE7;P35637	RNA-binding protein FUS	H3BPE7;P35637	FUS	23.6649	23.662	23.8064	23.9554	24.5581	24.2115	23.2017	22.8231	23.2503			1.36901	0.0427555	-0.530572	0.69228
P47813;O14602;X6RAC9;A6NJH9	Eukaryotic translation initiation factor 1A, X-chromosomal;Eukaryotic translation initiation factor 1A, Y-chromosomal	P47813;O14602;X6RAC9;A6NJH9	EIF1AX;EIF1AY	21.1048	21.1033	22.4692	22.6734	22.2804	21.3057	21.5709	21.8769	20.6413			0.360364	0.43615	-0.52742	0.693794
P51571;A6NLM8	Translocon-associated protein subunit delta	P51571;A6NLM8	SSR4	22.5261	23.769	23.0543	23.5048	23.4712	23.9456	22.6885	22.6387	23.0606			0.59959	0.251426	-0.524071	0.695407
K7ES02;Q13867;K7ESE8;J3KSD8;J3KS79;K7ENH5	Bleomycin hydrolase	K7ES02;Q13867;K7ESE8;J3KSD8	BLMH	22.778	22.9064	21.8739	23.4989	22.6465	22.9748	22.3745	22.4035	23.0086			0.565692	0.271837	-0.520635	0.697065
O75342	Arachidonate 12-lipoxygenase, 12R-type	O75342	ALOX12B	23.8645	23.6384	23.3445	23.9347	24.4914	23.9802	22.3722	22.0404	22.7851			1.04559	0.0900339	-0.519663	0.697535
P29508;Q5K684;H0Y5H9;P48594;C9JZ65	Serpin B3;Serpin B4	P29508;Q5K684;H0Y5H9;P48594	SERPINB3;SERPINB4	22.4267	22.6559	21.9871	23.4801	22.6455	22.4933	22.0303	23.8	20.9147			0.639951	0.229113	-0.516403	0.699113
Q3BDU5;P02545;Q5TCI8;H0YAB0	Prelamin-A/C;Lamin-A/C	Q3BDU5;P02545;Q5TCI8	LMNA	22.4607	20.9444	18.5641	21.7763	22.0905	19.6451	21.7098	21.913	19.0508			0.138822	0.726403	-0.514223	0.70017
Q9UG63	ATP-binding cassette sub-family F member 2	Q9UG63	ABCF2	20.4628	19.9867	20.1634	22.0029	20.4542	19.6958	20.1227	19.9376	19.97			0.30107	0.499954	-0.513343	0.700597
Q12904;D6R937	Aminoacyl tRNA synthase complex-interacting multifunctional protein 1;Endothelial monocyte-activating polypeptide 2	Q12904	AIMP1	20.8856	18.922	22.5217	19.847	22.4559	21.5645	21.2034	21.1999	21.7525			0.147685	0.711729	-0.512708	0.700906
O75400;H0YG38;F5H578	Pre-mRNA-processing factor 40 homolog A	O75400	PRPF40A	22.1029	21.0044	21.6297	21.2292	22.6021	22.4286	21.3043	21.4685	22.2518			0.40077	0.397402	-0.507626	0.703379
Q8WXX5	DnaJ homolog subfamily C member 9	Q8WXX5	DNAJC9	21.3373	21.4693	21.4851	21.4166	22.6696	21.7237	21.4923	21.4817	21.9966			0.595611	0.25374	-0.506027	0.704159
P78362;H7C5L6	SRSF protein kinase 2;SRSF protein kinase 2 N-terminal;SRSF protein kinase 2 C-terminal	P78362	SRPK2	20.5109	20.6343	19.8524	20.9345	21.8197	19.7595	20.0362	20.7725	20.9398			0.321865	0.47658	-0.505365	0.704482
P31944	Caspase-14;Caspase-14 subunit p17, mature form;Caspase-14 subunit p10, mature form;Caspase-14 subunit p20, intermediate form;Caspase-14 subunit p8, intermediate form	P31944	CASP14	23.4326	22.6085	22.7859	23.0437	24.0244	23.2624	21.9576	21.7619	21.6054			0.573925	0.266732	-0.501181	0.706528
A0A0C4DG89;Q7L014;D6RJA6	Probable ATP-dependent RNA helicase DDX46	A0A0C4DG89;Q7L014	DDX46	23.9668	23.8321	22.9336	23.7192	24.0142	24.499	23.4767	23.5647	23.8966			0.560051	0.275391	-0.499949	0.707132
P06702	Protein S100-A9	P06702	S100A9	21.6132	21.4839	21.704	22.5844	21.9416	21.7413	21.3509	21.2842	20.6454			0.867154	0.135783	-0.488763	0.712636
A0A087WZW8;A0A087X1V9;P01834;A0A075B6H6;A0A0U1RRF4;A0A087WWV8	Ig kappa chain C region	A0A087WZW8;A0A087X1V9;P01834;A0A075B6H6	IGKV3-11;IGKC	22.379	22.3687	22.3613	22.8056	23.038	22.7269	22.5302	22.3523	22.39			2.18885	0.00647373	-0.487193	0.713412
Q9H4E7	Differentially expressed in FDCP 6 homolog	Q9H4E7	DEF6	20.8536	20.592	20.4954	20.963	21.3219	21.1177	21.0985	21.2141	21.1396			1.51006	0.0308988	-0.487176	0.71342
P28074;G8JLC2;G3V3K3;H0YJM8	Proteasome subunit beta type-5	P28074	PSMB5	21.6533	21.708	21.6338	22.0746	22.1408	22.2406	21.6051	21.9966	21.7946			3.10544	0.00078444	-0.486963	0.713525
J3QL05;J3KP15;Q01130;Q9BRL6	Serine/arginine-rich splicing factor 2	J3QL05;J3KP15;Q01130	SRSF2	24.8714	24.7586	24.479	24.7799	25.535	25.2529	23.9655	24.3556	24.3692			0.910558	0.122869	-0.48625	0.713878
O00303;H0YDT6;A0A0D9SEZ9	Eukaryotic translation initiation factor 3 subunit F	O00303	EIF3F	23.0405	22.4693	22.4072	22.8775	23.2874	23.2097	23.183	22.9267	23.3518			0.957624	0.110249	-0.485896	0.714053
Q2TAY7	WD40 repeat-containing protein SMU1;WD40 repeat-containing protein SMU1, N-terminally processed	Q2TAY7	SMU1	22.3015	22.609	22.0525	22.5714	22.8325	23.0123	22.6085	22.3989	22.598			1.10786	0.0780088	-0.48445	0.714769
CATD_HUMAN;P07339;H7C469;C9JH19;H7C1V0;F8WD96;F8W787	Cathepsin D;Cathepsin D light chain;Cathepsin D heavy chain	CATD_HUMAN;P07339;H7C469;C9JH19;H7C1V0;F8WD96	CTSD	24.2121	24.4049	24.5623	25.1506	24.6022	24.877	23.9656	24.2133	23.8855			1.20907	0.0617921	-0.483515	0.715233
P63010;A0A087X253;A0A087WU93;A0A087WZQ6;A0A087WYD1;K7EN71;K7ERB2;A0A087WXS3;K7EKZ5;K7EJX1	AP-2 complex subunit beta	P63010;A0A087X253	AP2B1	22.8761	22.7592	23.0292	23.1425	23.407	23.5635	23.1844	23.4641	23.6626			1.53041	0.029484	-0.482831	0.715572
Q92896;H3BM42;H3BQU9	Golgi apparatus protein 1	Q92896;H3BM42	GLG1	18.8706	20.6578	20.2924	19.8133	20.2161	21.2336	20.804	20.9136	21.0245			0.280471	0.524238	-0.480708	0.716626
A0A087WU53;Q9H0U3	Magnesium transporter protein 1	A0A087WU53;Q9H0U3	MAGT1	19.5744	20.3786	20.9704	20.5643	20.5703	21.2258	20.539	21.0606	20.7739			0.447606	0.356775	-0.478995	0.717477
B0QYK0;Q01844;H7BY36;A0A0D9SFL3;C9JGE3;F8WC90	RNA-binding protein EWS	B0QYK0;Q01844;H7BY36;A0A0D9SFL3;C9JGE3	EWSR1	21.8052	21.9148	21.2938	21.9072	22.2964	22.2424	21.2354	21.5621	21.8471			0.986777	0.103092	-0.477376	0.718283
CATA_HUMAN;P04040	Catalase	CATA_HUMAN;P04040	CAT	24.3425	23.7048	23.7104	24.54	24.682	23.9654	23.5003	23.4549	23.7473			0.715044	0.192733	-0.476554	0.718692
H3BLU7;O43488;Q8NHP1	Aflatoxin B1 aldehyde reductase member 2;Aflatoxin B1 aldehyde reductase member 4	H3BLU7;O43488;Q8NHP1	AKR7A2;AKR7L	20.0006	20.7126	21.4972	21.1116	20.6416	21.8803	21.1642	20.8626	20.7927			0.349713	0.446979	-0.474386	0.719773
Q8WWK9;C9J7Y4	Cytoskeleton-associated protein 2	Q8WWK9	CKAP2	20.1343	21.5655	19.4883	20.4261	21.0834	21.1011	19.6375	21.1792	20.1842			0.294328	0.507775	-0.474177	0.719877
B9A018;Q53GS9;A0A087X1B2;A0A087WW31;F8WC91	U4/U6.U5 tri-snRNP-associated protein 2	B9A018;Q53GS9;A0A087X1B2	USP39	20.8877	20.9197	21.2888	21.2955	21.8599	21.3538	21.7083	21.5281	22.0865			1.00126	0.09971	-0.470957	0.721486
F8W726;Q14157;Q5VU77;H0Y5H6;H7C2T8	Ubiquitin-associated protein 2-like	F8W726;Q14157;Q5VU77	UBAP2L	23.419	23.3133	23.1646	23.26	24.036	24.0029	22.1503	22.0172	22.3632			0.820259	0.151266	-0.4673	0.723317
E9PKG1;H7C2I1;Q99873;E9PIX6;E9PQ98;A0A087X1W2;E9PNR9;H0YDE4;Q9NR22	Protein arginine N-methyltransferase 1	E9PKG1;H7C2I1;Q99873;E9PIX6;E9PQ98;A0A087X1W2	PRMT1	22.6362	22.7647	23.0375	23.4022	23.3699	23.0584	23.0833	23.1048	23.427			1.34536	0.0451483	-0.464031	0.724958
O15143;C9JTT6;C9JBJ7;C9K057;C9J4Z7;F8VXW2;C9JEY1;C9JQM8;C9JFG9;C9J6C8;C9JM51;F8WEB3	Actin-related protein 2/3 complex subunit 1B	O15143	ARPC1B	23.1185	23.5181	22.9256	23.3794	23.611	23.9636	23.0019	23.1598	23.262			0.887942	0.129437	-0.463936	0.725005
K7ENG2;P26368	Splicing factor U2AF 65 kDa subunit	K7ENG2;P26368	U2AF2	22.6442	23.1203	22.7658	23.4041	23.1776	23.3301	23.1619	23.1395	23.3556			1.36468	0.0431835	-0.460471	0.726749
Q5T749	Keratinocyte proline-rich protein	Q5T749	KPRP	27.6337	27.6003	27.2729	27.9924	28.2185	27.6752	27.0162	27.4841	27.2248			1.1079	0.0780014	-0.459748	0.727113
Q15067;I3L2U4;K7ELT1;I3L0T4	Peroxisomal acyl-coenzyme A oxidase 1	Q15067	ACOX1	19.9284	20.1435	20.1116	20.2514	21.4274	19.8779	20.211	20.3861	20.0566			0.412586	0.386736	-0.457766	0.728113
Q9NQ29;A8MYV2;B8ZZ10;B8ZZ09;F8WBC1;F2Z322	Putative RNA-binding protein Luc7-like 1	Q9NQ29;A8MYV2;B8ZZ10;B8ZZ09	LUC7L	22.1942	21.2611	20.9083	21.523	22.3502	21.8553	21.4399	21.4246	21.9357			0.429722	0.371773	-0.45494	0.72954
P00505	Aspartate aminotransferase, mitochondrial	P00505	GOT2	23.399	23.1516	22.4545	23.5477	23.3923	23.4238	23.744	23.7145	23.8586			0.722763	0.189338	-0.452902	0.730572
B4DLN1;P52815;Q9UBX3	39S ribosomal protein L12, mitochondrial;Mitochondrial dicarboxylate carrier	B4DLN1;P52815;Q9UBX3	MRPL12;SLC25A10	20.284	21.1685	20.6912	21.4463	20.8709	21.1847	21.2468	22.1267	21.4038			0.674156	0.21176	-0.452793	0.730627
P49189	4-trimethylaminobutyraldehyde dehydrogenase	P49189	ALDH9A1	21.2373	21.2578	21.0141	21.4461	21.7253	21.6766	21.8861	20.9781	21.6297			1.73411	0.0184453	-0.446269	0.733939
P46977;A0A0C4DH80;E9PN73;E9PI32;H0YET6	Dolichyl-diphosphooligosaccharide--protein glycosyltransferase subunit STT3A	P46977	STT3A	21.6232	21.6666	21.3355	21.8119	22.2925	21.8587	21.6911	22.0973	22.0044			1.13393	0.073463	-0.445922	0.734115
H3BTH5;H3BRB3;Q14807	Kinesin-like protein;Kinesin-like protein KIF22	H3BTH5;H3BRB3;Q14807	KIF22	19.7032	20.2253	20.4905	20.9801	20.968	19.8007	20.6893	20.8081	20.9203			0.415017	0.384576	-0.44324	0.735481
P14735;Q5T5N3	Insulin-degrading enzyme	P14735	IDE	18.865	20.0096	21.5225	19.8437	21.5263	20.3402	19.8682	20.0466	19.7667			0.181661	0.658171	-0.437664	0.738329
Q8TCJ2	Dolichyl-diphosphooligosaccharide--protein glycosyltransferase subunit STT3B	Q8TCJ2	STT3B	23.4645	23.2164	22.6841	23.4983	23.6062	23.5711	23.6372	23.6238	23.5804			0.875227	0.133283	-0.436897	0.738722
P05109	Protein S100-A8;Protein S100-A8, N-terminally processed	P05109	S100A8	24.5979	24.5437	24.6893	25.0195	25.0348	25.0857	24.6091	23.534	23.1331			3.12784	0.000745012	-0.436338	0.739008
A0A087WYT3;Q15185	Prostaglandin E synthase 3	A0A087WYT3;Q15185	PTGES3	20.9856	20.8633	21.3101	21.1275	22.3728	20.9673	21.1688	21.5845	21.2757			0.397694	0.400226	-0.436182	0.739088
P53350;I3L2H5;I3L387;I3L309	Serine/threonine-protein kinase PLK1	P53350	PLK1	21.886	21.6469	21.222	21.831	22.4534	21.7661	21.7659	21.9787	22.1769			0.669266	0.214158	-0.431889	0.741291
Q9HD45;Q5TB53	Transmembrane 9 superfamily member 3	Q9HD45;Q5TB53	TM9SF3	21.8917	21.2012	21.6172	21.6221	22.1769	22.1998	21.6486	21.8727	21.7952			0.711914	0.194127	-0.429546	0.742496
Q8N1F7;H3BVG0;H3BP95;H3BMX0;H3BPA9;H3BV15;H3BRD9;H3BVE2;H3BV11;H3BRI8;H3BM93	Nuclear pore complex protein Nup93	Q8N1F7;H3BVG0	NUP93	22.2832	21.8766	22.513	22.4525	22.6866	22.8213	22.697	23.1204	22.9931			0.933254	0.116613	-0.429198	0.742675
O60880	SH2 domain-containing protein 1A	O60880	SH2D1A	20.3149	21.8421	19.4727	20.8462	20.8826	21.169	19.299	21.9734	19.0151			0.237325	0.578995	-0.422689	0.746033
B1ANR0;Q13310;H0Y5F5;B1ANR1;H0YEU6;H0YEQ8	Polyadenylate-binding protein;Polyadenylate-binding protein 4	B1ANR0;Q13310;H0Y5F5	PABPC4	23.2235	23.8353	22.505	23.5773	23.5577	23.6962	22.9614	23.1567	23.0545			0.473401	0.336201	-0.422452	0.746156
Q15052;E9PDQ5;B1ALK7;Q14155	Rho guanine nucleotide exchange factor 6	Q15052	ARHGEF6	19.8606	21.4632	20.9546	20.8658	21.467	21.1927	21.5652	21.7556	22.0548			0.34143	0.455585	-0.415722	0.749644
Q7Z417	Nuclear fragile X mental retardation-interacting protein 2	Q7Z417	NUFIP2	22.7806	23.1914	22.9998	22.9672	23.8196	23.4321	21.7318	21.6733	21.7555			0.692235	0.203126	-0.415718	0.749646
A0A0U1RQH7;H0Y4X3;G3XAC6;Q14498;A0A0U1RQW2;Q5QP23;Q5QP22;A0A087X122;Q86U06	RNA-binding protein 39	A0A0U1RQH7;H0Y4X3;G3XAC6;Q14498;A0A0U1RQW2	RBM39	24.3812	24.1424	23.9513	24.383	24.7258	24.6043	24.1215	24.0942	24.3801			1.21374	0.0611304	-0.412752	0.751189
P61006	Ras-related protein Rab-8A	P61006	RAB8A	22.0128	22.0605	22.3815	22.8308	22.3711	22.489	22.7619	22.6376	22.7383			1.07589	0.0839682	-0.412007	0.751577
Q8NBM4;X6R5E5	Ubiquitin-associated domain-containing protein 2	Q8NBM4;X6R5E5	UBAC2	19.2248	22.8656	20.8534	21.0255	22.0079	21.1453	21.4291	21.1422	21.1398			0.13868	0.726641	-0.411646	0.751765
P43403;P43405;Q8NFD2	Tyrosine-protein kinase ZAP-70	P43403	ZAP70	22.6847	21.5418	22.8071	22.4442	22.7668	23.0422	23.6723	23.6471	23.3377			0.391178	0.406277	-0.406521	0.754441
P23490	Loricrin	P23490	LOR	24.8548	24.192	23.9616	24.7156	25.0222	24.4894	23.2571	22.9577	23.9854			0.586756	0.258967	-0.406239	0.754588
Q15027;I3L268;I3L0K9	Arf-GAP with coiled-coil, ANK repeat and PH domain-containing protein 1	Q15027	ACAP1	21.0142	20.4274	19.2821	19.6565	21.9242	20.3576	19.7488	19.9689	20.5941			0.183406	0.655532	-0.404869	0.755305
Q9BUQ8;H0YI52;F8VVA2	Probable ATP-dependent RNA helicase DDX23	Q9BUQ8	DDX23	21.8537	21.9031	21.2883	22.0987	22.1056	22.0432	21.9086	22.1097	22.2967			0.946052	0.113227	-0.400791	0.757443
Q7Z2W4;C9J6P4;H7C5K1	Zinc finger CCCH-type antiviral protein 1	Q7Z2W4;C9J6P4	ZC3HAV1	24.543	24.3734	23.9472	24.3969	24.9492	24.7181	24.0702	24.3533	24.2038			0.771647	0.169181	-0.400176	0.757766
P63000;P60763	Ras-related C3 botulinum toxin substrate 1;Ras-related C3 botulinum toxin substrate 3	P63000;P60763	RAC1;RAC3	21.7384	20.1155	21.9606	21.7517	22.1278	21.1277	22.0498	22.086	21.7271			0.240947	0.574186	-0.397523	0.759161
E7EX73;E9PGM1;E7EUU4;Q04637;A0A0A0MR52;H7C044;H7C0V6;C9J6B6;C9J2Z7;C9K073;C9JF13;A0A0A0MSA7;A0A0U1RQK7;O43432	Eukaryotic translation initiation factor 4 gamma 1	E7EX73;E9PGM1;E7EUU4;Q04637;A0A0A0MR52	EIF4G1	23.394	22.8755	22.9515	23.5205	23.4737	23.4107	23.4221	23.431	23.5865			1.12633	0.0747599	-0.394619	0.76069
P84077;P61204;F5H423;F5H0C7;H0YGG7	ADP-ribosylation factor 1;ADP-ribosylation factor 3	P84077;P61204;F5H423;F5H0C7	ARF1;ARF3	23.2236	23.58	22.8411	23.8014	23.517	23.5075	23.6583	23.6679	23.8433			0.774851	0.167938	-0.393733	0.761158
P67809;A0A087X1S2;H0Y449;C9J5V9	Nuclease-sensitive element-binding protein 1	P67809;A0A087X1S2;H0Y449	YBX1	28.2904	28.4524	28.5573	28.3516	29.0827	29.04	26.7192	26.8979	26.6759			0.717733	0.191543	-0.391373	0.762404
A0A087X1K9;E5RGR0;O75608;B4DP64	Acyl-protein thioesterase 1	A0A087X1K9;E5RGR0;O75608;B4DP64	LYPLA1	20.113	20.5989	20.7254	21.9902	20.4358	20.1797	19.8332	20.607	20.725			0.260545	0.548852	-0.389517	0.763385
O00425;F8WD15	Insulin-like growth factor 2 mRNA-binding protein 3	O00425	IGF2BP3	25.2167	25.1222	25.0748	25.2013	25.8365	25.5349	22.7696	22.6812	22.8189			0.961488	0.109273	-0.386325	0.765076
P38159;H3BT71;H0Y6E7;Q96E39;H3BR27;H3BUY5;H3BNC1;O75526;Q8N7X1	RNA-binding motif protein, X chromosome;RNA-binding motif protein, X chromosome, N-terminally processed;RNA binding motif protein, X-linked-like-1	P38159;H3BT71;H0Y6E7;Q96E39	RBMX;RBMXL1	26.0219	25.9065	25.8702	26.0053	26.6566	26.2943	25.0115	24.8975	25.1066			0.930287	0.117412	-0.385881	0.765311
P61026;P59190	Ras-related protein Rab-10	P61026	RAB10	21.8326	20.0671	19.2121	20.0991	22.0989	20.0354	20.5223	20.7132	19.2374			0.134195	0.734184	-0.373894	0.771697
Q96S59	Ran-binding protein 9	Q96S59	RANBP9	20.231	20.6442	20.4863	20.497	21.516	20.4621	20.5531	20.4233	20.6877			0.434329	0.36785	-0.371189	0.773145
Q7Z3K3	Pogo transposable element with ZNF domain	Q7Z3K3	POGZ	20.6264	20.2426	20.2644	19.5899	21.8576	20.799	19.9707	19.015	20.6836			0.216378	0.607605	-0.371001	0.773246
P32119;A6NIW5	Peroxiredoxin-2	P32119;A6NIW5	PRDX2	21.2819	21.7632	20.7793	21.9341	21.7379	21.2626	21.2093	20.9757	20.8288			0.460526	0.346317	-0.370076	0.773741
Q96PK6;A0A0A6YYI9;F8WDX3;A0A0A0MSL8;B8ZZ74	RNA-binding protein 14	Q96PK6	RBM14	24.4762	23.9089	23.9198	24.2917	24.5786	24.542	23.9823	24.0315	24.0971			0.822645	0.150437	-0.369143	0.774242
S4R369;Q9BZE1;H0Y4J2;A6NHR2	39S ribosomal protein L37, mitochondrial	S4R369;Q9BZE1;H0Y4J2;A6NHR2	MRPL37	20.3547	21.4252	21.3056	21.2083	22.231	20.7422	20.9829	20.9967	20.8776			0.262568	0.546302	-0.365332	0.77629
Q52LJ0	Protein FAM98B	Q52LJ0	FAM98B	21.1338	19.1982	21.8332	21.083	21.1727	21.0033	21.5984	22.0034	21.1326			0.175094	0.668199	-0.364658	0.776653
P62995;H7BXF3;H7C2L4	Transformer-2 protein homolog beta	P62995	TRA2B	23.9611	24.8112	24.135	24.2996	24.7692	24.9088	24.1384	24.0696	23.851			0.488356	0.324821	-0.356763	0.780915
H0YA96;H0Y8G5;Q14103;D6RAF8;D6RF44;D6RBQ9;D6RD83	Heterogeneous nuclear ribonucleoprotein D0	H0YA96;H0Y8G5;Q14103;D6RAF8;D6RF44;D6RBQ9	HNRNPD	26.0848	26.1936	26.5032	26.4638	26.6244	26.7573	25.6729	25.7332	25.8396			1.10181	0.079103	-0.354646	0.782061
Q14152	Eukaryotic translation initiation factor 3 subunit A	Q14152	EIF3A	26.3023	25.9773	25.9944	26.3587	26.5267	26.4508	26.5383	26.4422	26.7086			1.41843	0.0381564	-0.354072	0.782373
Q08722	Leukocyte surface antigen CD47	Q08722	CD47	23.337	22.7266	22.5429	23.0667	23.1769	23.4217	23.4198	23.4635	23.2519			0.603529	0.249156	-0.352928	0.782993
A0A087WW66;Q99460;H7C378;H7BZR6;C9J9M4	26S proteasome non-ATPase regulatory subunit 1	A0A087WW66;Q99460	PSMD1	21.192	21.9944	21.9301	21.3418	22.1889	22.6422	22.8116	22.2692	22.4604			0.312895	0.486524	-0.352147	0.783417
P28070	Proteasome subunit beta type-4	P28070	PSMB4	22.1455	21.6762	22.1195	22.1181	22.333	22.5381	22.0705	22.1051	22.0502			0.832113	0.147193	-0.349301	0.784964
O60832;C9IYT0;H7C0M1;H7BZF2;H7C2Q9;H7C2Q2	H/ACA ribonucleoprotein complex subunit 4	O60832;C9IYT0	DKC1	20.2556	20.7099	21.3583	20.8028	21.3265	21.2393	20.8998	20.47	21.1019			0.41284	0.386509	-0.348263	0.785529
Q96P63	Serpin B12	Q96P63	SERPINB12	24.9987	24.6169	24.301	24.8016	25.4434	24.7163	23.3884	24.244	23.4731			0.497658	0.317938	-0.348253	0.785535
P49792;F8WBP7	E3 SUMO-protein ligase RanBP2	P49792	RANBP2	22.4269	22.059	22.3556	22.1436	22.8916	22.838	22.5782	22.6892	22.7112			0.575786	0.265592	-0.343882	0.787919
B5MDF5;P62826;J3KQE5;F5H018;B4DV51;H0YFC6;A0A087X0W0	GTP-binding nuclear protein Ran	B5MDF5;P62826;J3KQE5;F5H018;B4DV51	RAN	26.4347	26.1093	26.5014	26.5219	26.8793	26.6671	26.1443	26.2508	25.9751			1.00274	0.0993702	-0.340968	0.789512
B1AK87;B1AK88		B1AK87;B1AK88	CAPZB	23.352	23.0292	22.5319	23.1994	23.0685	23.6637	23.6106	23.5766	23.343			0.495066	0.319841	-0.339506	0.790312
P60953;Q5JYX0;F8WET9;B1AH79;G3V4H1;G3V476;A0A0C4DH03;P17081;Q9H4E5	Cell division control protein 42 homolog	P60953;Q5JYX0	CDC42	21.6273	22.1333	22.1794	22.0237	22.5316	22.401	22.667	22.0675	22.3906			0.657149	0.220217	-0.338786	0.790707
P18077;C9K025;F8WBS5;F8WB72	60S ribosomal protein L35a	P18077;C9K025;F8WBS5;F8WB72	RPL35A	23.4331	23.0429	23.6976	23.5601	23.5158	24.1135	23.9408	24.2742	24.2544			0.554747	0.278775	-0.338572	0.790824
D3YTK1;Q9C0K0	B-cell lymphoma/leukemia 11B	D3YTK1;Q9C0K0	BCL11B	21.1557	20.7525	20.6762	20.3342	23.3221	19.941	20.8605	20.6057	20.8419			0.113645	0.76976	-0.337614	0.791349
K7EIS0;Q9NRH3;P23258;K7EKE5	Tubulin gamma chain;Tubulin gamma-2 chain;Tubulin gamma-1 chain	K7EIS0;Q9NRH3;P23258;K7EKE5	TUBG1;TUBG2	19.0321	20.6654	22.0121	20.5304	20.5546	21.6217	20.6956	20.7982	20.4409			0.130862	0.73984	-0.332367	0.794232
P42357;F8W0V1;F8VNX0	Histidine ammonia-lyase	P42357;F8W0V1	HAL	22.828	22.039	22.3266	22.692	22.8178	22.6766	21.8342	21.3931	21.5223			0.635464	0.231492	-0.330954	0.79501
Q9UMS4;F5GY56;H0YGF3;H0YGZ5;F5H2I0	Pre-mRNA-processing factor 19	Q9UMS4	PRPF19	25.0607	25.289	24.9414	25.6788	25.1959	25.4073	25.0678	25.1345	25.3438			0.889911	0.128851	-0.330294	0.795375
O75937	DnaJ homolog subfamily C member 8	O75937	DNAJC8	19.7758	21.7918	20.9375	20.5207	22.5091	20.4616	19.2233	20.5204	20.8497			0.136162	0.730866	-0.328769	0.796216
Q5VTR2;C9JWJ4;C9J0A5;C9JXC9	E3 ubiquitin-protein ligase BRE1A	Q5VTR2;C9JWJ4;C9J0A5;C9JXC9	RNF20	21.439	19.9561	21.681	20.6345	20.946	22.4818	21.4204	21.766	20.4181			0.156776	0.696986	-0.328758	0.796222
Q15717;M0QZR9;M0R055	ELAV-like protein 1	Q15717;M0QZR9	ELAVL1	24.4354	24.6808	24.6888	24.7118	25.0503	25.0217	24.6193	24.6429	24.5317			1.12318	0.0753046	-0.326283	0.797589
P78417;Q5TA01;Q5TA02	Glutathione S-transferase omega-1	P78417;Q5TA01;Q5TA02	GSTO1	20.9899	21.8639	22.7895	22.3797	21.8293	22.4049	22.4782	22.8157	22.4112			0.229411	0.589643	-0.323487	0.799136
H3BLZ8;Q92841;A0A0U1RQJ0	Probable ATP-dependent RNA helicase DDX17	H3BLZ8;Q92841	DDX17	25.5809	25.6971	25.1733	25.7864	25.8971	25.7381	25.4043	25.4363	25.5615			0.911669	0.122555	-0.323465	0.799148
Q9BVK6	Transmembrane emp24 domain-containing protein 9	Q9BVK6	TMED9	21.0097	21.4275	21.6318	22.1263	21.2583	21.6543	22.3851	22.1585	22.4916			0.447718	0.356683	-0.323279	0.799251
P0DN76;Q01081;M0QYK5;M0R2N4;Q8WU68;K7EJH3;K7EJM7	Splicing factor U2AF 35 kDa subunit	P0DN76;Q01081	U2AF1	20.3412	20.3404	21.2672	21.5354	21.2886	20.0824	21.9959	21.6991	21.5955			0.229556	0.589446	-0.319191	0.801519
Q16666;A0A0A0MRB1;H3BM18;X6RHM1;H3BVE6;X6RHR0;H3BR88;Q6K0P9	Gamma-interferon-inducible protein 16	Q16666	IFI16	24.9815	24.6727	24.111	24.8089	25.098	24.812	24.4059	24.3883	24.4909			0.511758	0.307781	-0.317895	0.802239
H3BNX8;P20674;H3BRM5;H3BV69	Cytochrome c oxidase subunit 5A, mitochondrial	H3BNX8;P20674;H3BRM5;H3BV69	COX5A	20.5216	20.4362	21.7213	20.9444	20.8444	21.8408	18.7125	20.2225	19.634			0.239141	0.576579	-0.316871	0.802809
Q13283;E5RIZ6;E5RI46;E5RIF8;E5RH42;E5RJU8;E5RH00;D6R9X5;D6R9A4;D6RBM9;D6REX8;D6RBR0;D6RE13;D6RBW8	Ras GTPase-activating protein-binding protein 1	Q13283	G3BP1	24.6923	24.389	24.2509	24.4439	25.0846	24.7541	22.9119	22.7825	23.1449			0.630495	0.234156	-0.3168	0.802849
P19174;V9GY63	1-phosphatidylinositol 4,5-bisphosphate phosphodiesterase gamma-1	P19174	PLCG1	19.7531	21.1839	20.9112	20.9021	20.8744	21.0211	21.2147	21.2119	21.6003			0.290267	0.512546	-0.316514	0.803008
O95747;C9JIG9	Serine/threonine-protein kinase OSR1	O95747;C9JIG9	OXSR1	21.1256	19.4698	19.4732	19.8744	20.2798	20.8595	19.9118	19.9451	19.8708			0.194727	0.638665	-0.315033	0.803833
Q00839;Q5RI18	Heterogeneous nuclear ribonucleoprotein U	Q00839	HNRNPU	27.9326	28.1377	27.9692	27.9976	28.6689	28.3176	27.5681	27.418	27.4536			0.704625	0.197413	-0.314873	0.803922
B1AN48;Q9UBC9	Small proline-rich protein 3	B1AN48;Q9UBC9	SPRR3	20.1211	20.2398	20.587	20.6975	21.9413	19.2493	24.2151	19.9843	19.8092			0.147554	0.711944	-0.313408	0.804739
P49207	60S ribosomal protein L34	P49207	RPL34	23.8898	24.1118	23.7121	24.091	24.3902	24.1461	23.7555	23.879	23.9205			0.965639	0.108233	-0.304562	0.809688
P35249;C9JZI1;C9JXZ7;C9JTT7;C9J8M3;C9JGY5;F8WE44;C9JW34;H7C1P0	Replication factor C subunit 4	P35249;C9JZI1;C9JXZ7;C9JTT7;C9J8M3	RFC4	20.6208	20.4746	20.7782	20.9809	21.5126	20.2905	21.4202	21.7578	21.384			0.345015	0.45184	-0.3035	0.810284
Q6ZVX7	F-box only protein 50	Q6ZVX7	NCCRP1	22.3992	22.0125	21.0068	22.3369	22.7978	21.1938	21.3841	21.8717	21.2527			0.182883	0.656322	-0.303379	0.810352
P36871	Phosphoglucomutase-1	P36871	PGM1	21.8568	20.222	19.8824	20.4005	21.76	20.7071	20.7898	20.997	20.15			0.153489	0.702281	-0.302126	0.811056
Q5QNZ2;P24539	ATP synthase F(0) complex subunit B1, mitochondrial	Q5QNZ2;P24539	ATP5F1	22.583	22.1618	22.3643	22.8933	22.5665	22.548	23.0983	23.1898	23.6248			0.840458	0.144392	-0.299573	0.812493
O43776;K7EMQ6;K7EIU7;K7EPK2;K7EQ35	Asparagine--tRNA ligase, cytoplasmic	O43776	NARS	21.4807	21.3355	22.1087	21.9742	21.984	21.8631	22.3957	22.2077	22.4472			0.550032	0.281817	-0.298783	0.812938
Q96IX5	Up-regulated during skeletal muscle growth protein 5	Q96IX5	USMG5	22.5661	22.3987	22.4144	22.9579	22.1109	23.2037	22.7973	22.9123	22.9601			0.372001	0.424618	-0.297777	0.813505
D6R9P3;D6RD18;D6RBZ0;A0A087WZV1;Q99729	Heterogeneous nuclear ribonucleoprotein A/B	D6R9P3;D6RD18;D6RBZ0;A0A087WZV1;Q99729	HNRNPAB	24.7079	24.3422	23.6887	24.3539	24.6062	24.6655	23.6477	23.2643	23.4644			0.399588	0.398485	-0.295604	0.814731
Q5T200;A0A087WX14	Zinc finger CCCH domain-containing protein 13	Q5T200	ZC3H13	20.3397	19.9052	22.5218	20.1621	22.1575	21.3317	20.6764	18.7683	19.0444			0.106926	0.781762	-0.294863	0.81515
P41091;Q2VIR3;F8W810;H7BZU1	Eukaryotic translation initiation factor 2 subunit 3;Putative eukaryotic translation initiation factor 2 subunit 3-like protein	P41091;Q2VIR3;F8W810	EIF2S3;EIF2S3L	25.8283	25.7147	25.0224	25.7691	25.8344	25.8321	25.3407	25.6837	25.7809			0.501566	0.31509	-0.290061	0.817867
Q12788;J3KNP2;A0A087WYP7	Transducin beta-like protein 3	Q12788;J3KNP2;A0A087WYP7	TBL3	20.9556	21.9708	21.5523	21.441	21.827	22.0764	21.8628	21.8393	21.7683			0.343579	0.453337	-0.288541	0.81873
Q02413	Desmoglein-1	Q02413	DSG1	27.0963	26.9799	26.7231	27.2677	27.5404	26.8563	26.4329	26.7107	26.1598			0.563063	0.273487	-0.288342	0.818843
A0A087WUL2;P49720;A0A087WXQ8;A0A087WY10	Proteasome subunit beta type-3	A0A087WUL2;P49720;A0A087WXQ8;A0A087WY10	PSMB3	21.9871	21.2521	20.1882	20.1154	21.5775	22.5973	22.4264	22.3772	21.9921			0.11767	0.762657	-0.287625	0.81925
THIO_HUMAN;P10599	Thioredoxin	THIO_HUMAN;P10599	TXN	21.7617	21.6603	22.3874	23.3826	21.939	21.35	21.6607	21.7405	21.4382			0.168112	0.679028	-0.287404	0.819375
Q9H2U1;E7EWK3;H7C5F5;A0A0G2JRP3;A0A0G2JQU7	ATP-dependent RNA helicase DHX36	Q9H2U1;E7EWK3	DHX36	21.5499	20.5701	20.0846	20.8625	21.025	21.1791	20.2586	22.7263	19.4154			0.259783	0.549816	-0.287351	0.819405
O00154;K7EKP8	Cytosolic acyl coenzyme A thioester hydrolase	O00154;K7EKP8	ACOT7	22.6818	23.3778	22.5389	23.1827	23.1902	23.0873	22.698	22.9712	22.8347			0.477215	0.333262	-0.287255	0.81946
Q99986;H0YJF7;H0YJ50	Serine/threonine-protein kinase VRK1	Q99986	VRK1	20.9611	21.7821	20.9786	21.4378	21.0611	22.0828	21.2789	21.7925	21.4822			0.287328	0.516027	-0.28667	0.819792
P00387;B1AHF3	NADH-cytochrome b5 reductase 3;NADH-cytochrome b5 reductase 3 membrane-bound form;NADH-cytochrome b5 reductase 3 soluble form	P00387;B1AHF3	CYB5R3	23.4779	23.4555	23.5538	23.8023	23.6699	23.8744	23.7903	23.6574	23.8907			1.89285	0.0127981	-0.286462	0.81991
O60341;R4GMQ1;R4GMP9	Lysine-specific histone demethylase 1A	O60341;R4GMQ1;R4GMP9	KDM1A	21.3443	21.2392	20.5182	21.4401	21.0694	21.4461	21.9764	21.7185	22.3385			0.421436	0.378934	-0.284635	0.820949
P04406;E7EUT5	Glyceraldehyde-3-phosphate dehydrogenase	P04406;E7EUT5	GAPDH	28.5669	28.5228	28.925	28.8551	29.0755	28.9254	28.6244	28.7662	28.7864			0.915975	0.121346	-0.280437	0.823341
P11940;A0A087WTT1;E7EQV3;E7ERJ7;H0YAR2;Q9H361;E5RJB9;H0YAP2;H0YBN4;E5RGH3;E5RH24;H0YB86;Q4VXU2;E5RHG7;H0YAS7;H0YAS6;H0YB75;H0YCC8;Q96DU9;H0YC10;E5RGC4;E5RFD8	Polyadenylate-binding protein 1;Polyadenylate-binding protein	P11940;A0A087WTT1;E7EQV3;E7ERJ7;H0YAR2	PABPC1	25.7707	26.3373	26.3333	26.2677	26.5053	26.5097	26.3382	26.098	26.3298			0.61597	0.24212	-0.28042	0.823351
P26038;V9GZ54;E9PNP4	Moesin	P26038	MSN	25.7966	25.7275	26.278	26.323	26.2143	26.1024	25.9474	26.0294	26.0217			0.688928	0.204678	-0.279207	0.824044
Q9Y2W1	Thyroid hormone receptor-associated protein 3	Q9Y2W1	THRAP3	22.6031	22.1842	22.174	22.2105	22.7292	22.8542	21.8524	22.0277	22.3259			0.499851	0.316337	-0.277508	0.825015
P16615;H7C5W9;O14983	Sarcoplasmic/endoplasmic reticulum calcium ATPase 2	P16615;H7C5W9	ATP2A2	24.5842	23.8531	23.8683	24.4283	24.2679	24.4364	24.3774	24.6939	24.9489			0.484709	0.32756	-0.27566	0.826072
P09960;B4DEH5	Leukotriene A-4 hydrolase	P09960	LTA4H	22.5429	21.9747	22.2962	22.0586	22.9525	22.6231	21.9977	22.0257	22.0549			0.371177	0.425425	-0.273497	0.827312
P57740;G3V1T4	Nuclear pore complex protein Nup107	P57740;G3V1T4	NUP107	20.9287	20.5012	21.0766	20.7889	21.656	20.8798	21.4902	20.9134	21.9418			0.348461	0.44827	-0.272718	0.827759
Q8TCT9;A0A075B6F6;A0A0C4DGU3	Minor histocompatibility antigen H13	Q8TCT9;A0A075B6F6	HM13	20.3786	20.7463	20.9934	20.7535	20.88	21.2961	21.8233	21.8599	21.5148			0.485317	0.327101	-0.270428	0.829073
E9PCT1;A9Z1X7;Q8IYB3;M0R1E7;M0R088	Serine/arginine repetitive matrix protein 1	E9PCT1;A9Z1X7;Q8IYB3;M0R1E7	SRRM1	21.7711	21.6943	20.7628	21.4485	20.8554	22.7295	21.7402	21.7894	21.6619			0.156811	0.69693	-0.268385	0.830248
P35606;D6R997;D6RBZ7;D6RCL6;D6RBG7;D6RBT6;H0YAC7	Coatomer subunit beta	P35606	COPB2	23.8428	23.9418	23.7824	24.0542	24.1321	24.1855	24.15	24.239	24.0668			1.9537	0.0111251	-0.26829	0.830303
Q6UN15;A0A0B4J203	Pre-mRNA 3-end-processing factor FIP1	Q6UN15;A0A0B4J203	FIP1L1	20.9142	21.7194	21.4695	21.5372	21.3298	22.0322	21.5791	21.8426	21.9224			0.348011	0.448734	-0.265326	0.832011
O00182;J3QS92;J3KSY2;Q6DKI2;Q3B8N2;J3KSA0;J3QSH0;J3KS82;J3KT17;J3QR96	Galectin-9;Galectin;Galectin-9C;Galectin-9B	O00182;J3QS92;J3KSY2;Q6DKI2;Q3B8N2	LGALS9;LGALS9C;LGALS9B	24.1482	24.2989	23.8394	24.2838	24.6629	24.1311	23.1308	23.4925	23.1273			0.562845	0.273625	-0.263764	0.832912
P00491;G3V5M2;G3V393;G3V2H3	Purine nucleoside phosphorylase	P00491;G3V5M2	PNP	22.66	22.2163	22.1534	22.5414	22.4192	22.8589	22.4057	22.6623	22.7273			0.566871	0.2711	-0.263276	0.833194
H7C3I1;A0A087X1H6;P50502;F6VDH7;Q3KNR6;Q8IZP2;Q8NFI4	Hsc70-interacting protein;Putative protein FAM10A4;Putative protein FAM10A5	H7C3I1;A0A087X1H6;P50502;F6VDH7;Q3KNR6;Q8IZP2;Q8NFI4	ST13;ST13P4;ST13P5	23.1183	23.1505	23.1038	23.5237	23.2515	23.3864	23.3069	23.1598	23.0812			1.52241	0.0300324	-0.263013	0.833346
A0A0A0MRA5;B7Z4B8;Q9BUJ2;M0R3F1;M0QYZ0;M0QYI8;M0R203;M0QYM5;M0QZV6;M0R0K8	Heterogeneous nuclear ribonucleoprotein U-like protein 1	A0A0A0MRA5;B7Z4B8;Q9BUJ2;M0R3F1;M0QYZ0	HNRNPUL1	23.74	23.1939	23.0534	23.2825	23.839	23.6546	23.2053	22.961	23.0075			0.421928	0.378505	-0.262938	0.833389
Q9Y266;A0A0A0MSU9;A0A0A0MSS4	Nuclear migration protein nudC	Q9Y266;A0A0A0MSU9	NUDC	19.8367	21.2751	20.9652	21.0517	20.6076	21.2051	20.97	21.2353	20.5666			0.216086	0.608015	-0.262497	0.833644
A0A0A0MRK6;Q13505;A0A0C4DFQ1	Metaxin-1	A0A0A0MRK6;Q13505;A0A0C4DFQ1	MTX1	20.4739	20.2486	20.7124	20.3945	21.2199	20.594	20.7072	21.2351	21.1898			0.384088	0.412964	-0.257791	0.836368
Q8NBX0	Saccharopine dehydrogenase-like oxidoreductase	Q8NBX0	SCCPDH	22.1698	22.5575	22.1453	22.5037	22.6451	22.4962	23.2475	23.1185	23.3723			0.841287	0.144116	-0.257452	0.836564
O43143	Pre-mRNA-splicing factor ATP-dependent RNA helicase DHX15	O43143	DHX15	24.6191	24.5613	24.0841	24.6314	24.7464	24.6498	24.6181	24.6921	24.9473			0.665642	0.215952	-0.254367	0.838355
P60468;S4R3B5	Protein transport protein Sec61 subunit beta	P60468;S4R3B5	SEC61B	20.9645	20.8358	20.7446	20.9159	20.7489	21.6358	22.1094	20.5018	20.656			0.378381	0.418426	-0.251874	0.839805
H7BXY3;Q7L2E3	Putative ATP-dependent RNA helicase DHX30	H7BXY3;Q7L2E3	DHX30	24.1367	24.0776	23.7075	23.8355	24.4535	24.3844	22.8988	22.8979	23.1426			0.455364	0.350458	-0.250525	0.840591
A0A0C4DGS1;P39656;U3KQ84	Dolichyl-diphosphooligosaccharide--protein glycosyltransferase 48 kDa subunit	A0A0C4DGS1;P39656;U3KQ84	DDOST	24.4094	24.7035	24.5086	24.7932	24.7404	24.8392	24.9022	24.7965	24.7797			1.29035	0.0512453	-0.250419	0.840652
Q9Y320	Thioredoxin-related transmembrane protein 2	Q9Y320	TMX2	20.2111	20.442	20.3462	20.4278	21.1972	20.1257	20.8028	20.5379	20.6528			0.314113	0.485162	-0.250403	0.840662
Q8N766	ER membrane protein complex subunit 1	Q8N766	EMC1	21.9163	22.1545	20.4475	21.7794	21.8791	21.6055	22.0322	22.2168	22.531			0.174558	0.669025	-0.24858	0.841724
E7ESL0;A0A0C4DGX2;J3KQY1;Q9NWU5	39S ribosomal protein L22, mitochondrial	E7ESL0;A0A0C4DGX2;J3KQY1;Q9NWU5	MRPL22	21.4143	21.1383	20.4634	20.5472	22.61	20.593	20.2318	20.4649	19.9665			0.121298	0.756314	-0.244741	0.843967
Q9BZE4;Q5T3R7	Nucleolar GTP-binding protein 1	Q9BZE4;Q5T3R7	GTPBP4	22.1116	21.7867	21.462	22.0694	21.8402	22.177	22.1947	22.6095	22.3071			0.498081	0.317629	-0.242072	0.84553
O14929;F8W9G7;F8WEW1	Histone acetyltransferase type B catalytic subunit	O14929	HAT1	21.7022	21.9193	22.1769	22.1476	22.0996	22.2769	22.8146	22.9797	22.8969			0.756265	0.175281	-0.241924	0.845617
P41240;H3BUM9;H3BU69	Tyrosine-protein kinase CSK	P41240;H3BUM9	CSK	21.9773	22.4288	21.7881	22.3106	22.5257	22.0811	22.4469	22.4893	22.6671			0.452841	0.3525	-0.241059	0.846124
P31947	14-3-3 protein sigma	P31947	SFN	18.3575	21.9184	20.0977	20.1896	20.2804	20.623	21.3699	20.8132	20.4358			0.0817651	0.82839	-0.239793	0.846867
P49721;A0A087WVV1	Proteasome subunit beta type-2	P49721;A0A087WVV1	PSMB2	21.7658	22.385	20.9193	22.4375	21.6944	21.656	22.4708	22.2787	22.7491			0.184307	0.654173	-0.239279	0.847169
P61019;H7C125	Ras-related protein Rab-2A	P61019	RAB2A	22.937	22.3218	21.7027	22.7741	22.1314	22.769	22.794	22.746	22.977			0.223484	0.597744	-0.237695	0.848099
P14866;M0QXS5;M0QYT0;M0R1W6;M0R076;B4DVF8;M0QYL7;H7C464;B7WPG3;C9IYN3;D6W592;Q8WVV9	Heterogeneous nuclear ribonucleoprotein L	P14866;M0QXS5	HNRNPL	26.0359	26.0111	25.6616	25.8013	26.4789	26.1379	24.9949	24.8671	24.8945			0.441469	0.361852	-0.236457	0.848828
Q7L2H7;J3KNJ2;E9PN86;H0YCQ8;E9PRI2;E9PRY0;E7ESM3	Eukaryotic translation initiation factor 3 subunit M	Q7L2H7;J3KNJ2	EIF3M	20.9074	20.5609	20.0148	20.4473	20.7512	20.992	21.1802	21.5794	21.3044			0.31779	0.481072	-0.235797	0.849216
B4DR61;P61619;H7C1Q9;C9JXC6;H7C069;A6NK38;F2Z2C7;A6NIF9;C9JJV4;F8W776;Q8TC24;Q9H9S3	Protein transport protein Sec61 subunit alpha isoform 1;Protein transport protein Sec61 subunit alpha isoform 2	B4DR61;P61619;H7C1Q9;C9JXC6;H7C069;A6NK38;F2Z2C7;A6NIF9;C9JJV4;F8W776;Q8TC24;Q9H9S3	SEC61A1;SEC61A2	18.736	21.0789	21.8357	20.4635	20.9002	20.9936	21.7238	21.7631	21.3476			0.0884107	0.815811	-0.23561	0.849326
Q01581;D6RIW1;P54868	Hydroxymethylglutaryl-CoA synthase, cytoplasmic	Q01581	HMGCS1	19.7027	21.2305	21.3243	20.4427	21.1342	21.3875	21.1272	20.998	21.2939			0.146864	0.713076	-0.235601	0.849331
P05198;H0YJS4;G3V4T5	Eukaryotic translation initiation factor 2 subunit 1	P05198;H0YJS4;G3V4T5	EIF2S1	23.0868	22.3333	23.2102	23.2873	22.9734	23.0755	23.144	23.159	23.0799			0.335761	0.461571	-0.235298	0.84951
P22528	Cornifin-B	P22528	SPRR1B	24.1398	23.1146	21.9368	23.078	23.6765	23.1384	24.2052	24.6498	21.3982			0.129262	0.74257	-0.233858	0.850358
B5MCX3;Q15019;H7C310;C9J2Q4;B5MD47;C9IY94;C9IZU3;C9JQJ4;C9J938;C9JB25;H7C2Y0;C9JZI2	Septin-2	B5MCX3;Q15019;H7C310;C9J2Q4	2017-09-02	21.9203	21.902	21.9614	22.0474	22.2256	22.2056	22.4032	22.4659	22.6527			1.76402	0.017218	-0.231646	0.851663
P11766;H0YAG8;D6RFE4;D6RAY0;D6R9G2	Alcohol dehydrogenase class-3	P11766;H0YAG8;D6RFE4	ADH5	21.6002	21.7163	22.3079	22.4053	22.0509	21.8597	22.5882	22.2453	22.4788			0.353292	0.44331	-0.23047	0.852357
F8VR82;F8VYE8;P36873;F8W0W8;A0A087WYY5	Serine/threonine-protein phosphatase;Serine/threonine-protein phosphatase PP1-gamma catalytic subunit	F8VR82;F8VYE8;P36873;F8W0W8	PPP1CC	20.0305	19.8143	20.83	20.4395	20.9599	19.9663	20.9939	20.4225	20.7812			0.211865	0.613952	-0.230293	0.852462
Q15233;C9JYS8;H7C367;C9IZL7;C9J4X2	Non-POU domain-containing octamer-binding protein	Q15233;C9JYS8;H7C367	NONO	25.1798	24.9334	25.4633	25.3242	25.3473	25.5904	25.2413	25.225	25.1849			0.581469	0.262139	-0.228462	0.853545
A0A087X163;Q9NP72;Q5W0J0;H0Y6T8	Ras-related protein Rab-18	A0A087X163;Q9NP72;Q5W0J0	RAB18	20.9398	19.3548	20.217	20.827	20.7057	19.6564	21.3584	21.2205	20.7482			0.141832	0.721387	-0.225782	0.855131
P18754;C9JW69;C9JRH2;C9JMJ4;C9J3R0;C9JQZ4	Regulator of chromosome condensation	P18754;C9JW69;C9JRH2;C9JMJ4;C9J3R0;C9JQZ4	RCC1	24.2196	23.9565	23.9963	24.2474	24.4036	24.1969	24.0933	24.1797	24.2025			1.02792	0.093773	-0.225154	0.855504
P34932;A0A087WYC1;A0A087WTS8	Heat shock 70 kDa protein 4	P34932;A0A087WYC1;A0A087WTS8	HSPA4	24.3018	24.3769	24.7871	25.0378	24.4053	24.6938	24.8091	25.0313	25.1453			0.399376	0.398679	-0.223708	0.856361
P50570;K7EMQ3;A0A0D9SFB1;A0A0U1RQP1;A0A0D9SFE4;Q05193;K7EPK9;H7C5U0;E5RHK8;Q9UQ16	Dynamin-2	P50570	DNM2	20.904	21.1735	20.8203	21.1309	21.3455	21.0908	21.8805	21.6699	21.7636			0.775015	0.167875	-0.223167	0.856683
Q01518;Q5T0R7;Q5T0R6;Q5T0R5;Q5T0R4;Q5T0R3;Q5T0R2;Q5T0R1;Q5T0R9;B7Z385;A0A087X0J3;A0A087WZ15;E9PDI2;P40123	Adenylyl cyclase-associated protein 1	Q01518	CAP1	22.8363	22.7312	23.4043	23.1998	23.0091	23.4255	23.3562	23.2706	23.3574			0.385375	0.411742	-0.22084	0.858065
A0A087WTP3;Q92945;M0R0I5;M0QYH3;M0QXW7;M0R3J3;M0QYG1;M0R0C6;M0R251;M0R263	Far upstream element-binding protein 2	A0A087WTP3;Q92945;M0R0I5	KHSRP	25.2152	24.8946	25.1538	25.1421	25.2601	25.5216	24.995	25.1051	25.1057			0.66976	0.213914	-0.220063	0.858528
Q96AG4;I3L223	Leucine-rich repeat-containing protein 59	Q96AG4	LRRC59	22.7204	22.0384	22.7013	22.6814	22.4549	22.9828	23.1705	23.1419	23.1289			0.333779	0.463683	-0.219668	0.858763
A0A0B4J1W3;Q9BXJ9	N-alpha-acetyltransferase 15, NatA auxiliary subunit	A0A0B4J1W3;Q9BXJ9	NAA15	19.827	19.4928	21.8196	19.4278	21.13	21.2391	20.52	20.8106	20.4036			0.0830653	0.825914	-0.219163	0.859064
J3KTA4;P17844;J3KRZ1;J3QSF1;J3QRQ7;J3QR02;J3KRX8;X6RLV5	Probable ATP-dependent RNA helicase DDX5	J3KTA4;P17844	DDX5	26.4838	26.3906	26.348	26.5141	26.6947	26.6577	26.5141	26.3448	26.3817			1.46298	0.0344363	-0.214751	0.861695
P23284	Peptidyl-prolyl cis-trans isomerase B	P23284	PPIB	23.5012	23.9761	23.6119	24.3632	23.5255	23.841	24.0893	24.2816	24.1037			0.30715	0.493004	-0.213486	0.862451
C9J3L8;C9J5W0;E9PAL7;C9IZQ1;P43307	Translocon-associated protein subunit alpha	C9J3L8;C9J5W0;E9PAL7;C9IZQ1;P43307	SSR1	21.1303	20.8171	21.2325	21.5127	20.9901	21.3054	21.5632	21.3333	21.6409			0.459596	0.34706	-0.209424	0.864883
G8JLG2;Q2L6G8;Q15517	Corneodesmosin	G8JLG2;Q2L6G8;Q15517	CDSN	25.8057	25.4287	25.5513	25.8335	26.3024	25.2774	24.9496	25.0609	24.6465			0.263911	0.544614	-0.209191	0.865022
P21796;C9JI87	Voltage-dependent anion-selective channel protein 1	P21796;C9JI87	VDAC1	25.7743	26.5271	26.9425	26.8657	26.5633	26.4323	26.5572	26.7027	26.4946			0.219635	0.603067	-0.205835	0.867037
P08621;M0QYR1;M0QX04	U1 small nuclear ribonucleoprotein 70 kDa	P08621;M0QYR1	SNRNP70	22.1792	21.9607	22.3061	22.1911	22.5134	22.3553	22.4088	22.2817	22.4121			0.677241	0.210261	-0.204608	0.867774
Q7KZF4;H7C597	Staphylococcal nuclease domain-containing protein 1	Q7KZF4	SND1	25.3751	25.2857	25.1513	25.3599	25.4394	25.6212	25.4731	25.4386	25.6008			0.93842	0.115234	-0.202765	0.868884
P61106;X6RFL8	Ras-related protein Rab-14	P61106;X6RFL8	RAB14	22.8988	23.1691	23.1897	23.5443	22.9803	23.3361	23.5726	23.586	23.7109			0.457789	0.348507	-0.20101	0.869941
P63244;J3KPE3;D6RHH4;D6RAC2;H0Y8W2;D6RFX4;H0YAF8;D6R9Z1;D6R9L0;D6REE5;H0YAM7;D6RAU2;E9PD14;D6RBD0;D6RFZ9;H0Y8R5;D6RGK8;D6RF23;D6R909;H0Y9P0;D6RHJ5;D6RDI0	Guanine nucleotide-binding protein subunit beta-2-like 1;Guanine nucleotide-binding protein subunit beta-2-like 1, N-terminally processed	P63244;J3KPE3;D6RHH4;D6RAC2;H0Y8W2;D6RFX4;H0YAF8;D6R9Z1;D6R9L0;D6REE5;H0YAM7	GNB2L1	24.8811	25.1273	25.1225	25.2161	25.3246	25.1898	25.4006	25.2843	25.2767			1.02928	0.0934795	-0.199856	0.870637
P47897;B4DDN1;H7C0R3;C9J165;A0A0U1RQX5;A0A0U1RRC8;A0A0U1RR66;A0A0U1RQT0;F2Z2V6;A0A0U1RQM8;A0A0U1RQU2;A0A0U1RQX9;A0A0U1RRI9;A0A0U1RQE9;A0A0U1RQL2;A0A0U1RQQ5	Glutamine--tRNA ligase	P47897;B4DDN1;H7C0R3	QARS	21.6364	21.3334	22.8164	22.0785	21.9099	22.3888	23.0826	22.7402	23.0959			0.155648	0.698799	-0.197004	0.87236
E9PEB5;Q96AE4;C9JSZ1	Far upstream element-binding protein 1	E9PEB5;Q96AE4;C9JSZ1	FUBP1	24.2119	23.9914	23.7019	23.8688	24.1359	24.4794	23.7728	23.967	24.0583			0.3476	0.449159	-0.193019	0.874773
B5MCF9;O00541;B3KXD6;H7C267	Pescadillo homolog	B5MCF9;O00541;B3KXD6	PES1	21.0677	21.2757	21.0482	20.3805	22.344	21.2445	20.9839	21.056	21.2482			0.122756	0.753778	-0.19245	0.875118
P13612;E7EP60	Integrin alpha-4	P13612;E7EP60	ITGA4	20.4299	19.9355	20.4678	19.8393	21.7752	19.7873	20.0743	20.2248	20.5049			0.100653	0.793135	-0.189555	0.876876
Q99613;B5ME19;H3BPE4;H3BTY8;H3BPE3	Eukaryotic translation initiation factor 3 subunit C;Eukaryotic translation initiation factor 3 subunit C-like protein	Q99613;B5ME19	EIF3C;EIF3CL	23.3553	23.2831	23.295	23.5536	23.1555	23.7903	24.0396	24.0904	24.4458			0.43283	0.369122	-0.18864	0.877432
E9PJL9;E9PLC6;E9PQP1;E9PMX3;B4DE93;G3V0I5;P49821;E9PPR0;E9PPD6;H0YE81	NADH dehydrogenase [ubiquinone] flavoprotein 1, mitochondrial	E9PJL9;E9PLC6;E9PQP1;E9PMX3;B4DE93;G3V0I5;P49821;E9PPR0	NDUFV1	20.5176	19.7273	20.5203	19.1536	20.1876	21.9864	20.0007	19.9156	19.913			0.0758795	0.839693	-0.18747	0.878144
P14868;C9J7S3;C9JLC1;H7BZ35;C9JQM9;H7C278	Aspartate--tRNA ligase, cytoplasmic	P14868	DARS	23.9056	23.8597	24.0722	24.0642	23.8525	24.4815	24.2831	24.462	24.5702			0.404756	0.393771	-0.186862	0.878514
O00116;B8ZZ81	Alkyldihydroxyacetonephosphate synthase, peroxisomal	O00116;B8ZZ81	AGPS	21.5545	21.4554	21.6242	21.6397	21.6085	21.9454	22.0944	22.3011	22.2886			0.722495	0.189454	-0.186515	0.878726
Q86UX7;F5H1C6;H0YFT5;F5H3I6	Fermitin family homolog 3	Q86UX7	FERMT3	23.87	24.1589	23.8227	24.084	24.1563	24.1699	24.3352	24.0877	24.2375			0.793386	0.160922	-0.186203	0.878916
P25788;G3V3W4;G3V5N4	Proteasome subunit alpha type-3	P25788;G3V3W4;G3V5N4	PSMA3	22.8722	22.7736	22.5839	23.1639	22.787	22.8272	22.3442	22.8299	22.6396			0.553158	0.279796	-0.182833	0.880972
P20618	Proteasome subunit beta type-1	P20618	PSMB1	20.9265	21.4819	21.8131	21.4564	21.2661	22.0463	21.7454	22.2493	21.6025			0.201276	0.629106	-0.182447	0.881207
R4GN43;A0A0C4DGS0;P56556	NADH dehydrogenase [ubiquinone] 1 alpha subcomplex subunit 6	R4GN43;A0A0C4DGS0;P56556	NDUFA6	21.1665	21.3778	19.9923	20.7963	21.188	21.0982	20.6503	20.8998	19.9469			0.151941	0.704788	-0.181942	0.881516
I3L1P8;Q02978	Mitochondrial 2-oxoglutarate/malate carrier protein	I3L1P8;Q02978	SLC25A11	24.2708	23.8905	23.4624	23.995	23.9585	24.2136	24.4464	24.6762	24.4867			0.298024	0.503473	-0.181166	0.88199
P23246;H0Y9K7	Splicing factor, proline- and glutamine-rich	P23246	SFPQ	24.9514	24.797	25.0065	24.8851	25.1439	25.2542	24.5585	24.5012	24.4179			0.628931	0.235001	-0.176125	0.885077
H7C1D4;E9PGT1;Q15631	Translin	H7C1D4;E9PGT1;Q15631	TSN	20.533	19.0725	21.1913	19.7173	20.4323	21.1707	20.4253	19.0043	20.5362			0.0818199	0.828286	-0.174483	0.886085
O14818;H0Y586;Q8TAA3;A0A087WYS6;F5GY34	Proteasome subunit alpha type-7;Proteasome subunit alpha type-7-like	O14818;H0Y586;Q8TAA3	PSMA7;PSMA8	24.3399	24.448	23.8804	24.5683	24.2384	24.3827	24.5241	24.6942	24.361			0.3656	0.430923	-0.173674	0.886582
E9PF10;O75694	Nuclear pore complex protein Nup155	E9PF10;O75694	NUP155	21.781	21.9461	22.1713	22.454	22.0196	21.9372	22.8407	22.8283	22.5769			0.363467	0.433045	-0.170819	0.888338
Q96QK1;I3L4S0;I3L4P4	Vacuolar protein sorting-associated protein 35	Q96QK1	VPS35	22.5109	22.953	22.7293	23.1435	22.6148	22.9449	23.307	23.2281	23.3594			0.353093	0.443514	-0.170023	0.888829
Q9Y6H1;Q5T1J5	Coiled-coil-helix-coiled-coil-helix domain-containing protein 2;Putative coiled-coil-helix-coiled-coil-helix domain-containing protein CHCHD2P9, mitochondrial	Q9Y6H1;Q5T1J5	CHCHD2;CHCHD2P9	21.5034	21.8385	22.1632	21.9246	21.8182	22.2607	21.5356	19.9544	19.8083			0.288682	0.51442	-0.166117	0.891238
O75477;B0QZ43	Erlin-1	O75477;B0QZ43	ERLIN1	21.14	20.9805	21.3353	21.8213	20.0651	22.0608	21.1113	21.4021	21.5303			0.0915788	0.809881	-0.163804	0.892668
F8WCF6;P59998;F8WDD7;A0A0A6YYG9;H7C0A3;R4GN08;F8WDW3;F8WE39	Actin-related protein 2/3 complex subunit 4	F8WCF6;P59998;F8WDD7;A0A0A6YYG9;H7C0A3	ARPC4-TTLL3;ARPC4	22.2837	23.0353	22.4653	23.0283	22.4934	22.7527	23.1584	23.1976	23.2131			0.234116	0.583289	-0.163333	0.89296
P23526	Adenosylhomocysteinase	P23526	AHCY	23.9237	23.5863	24.0207	24.1134	23.9938	23.9123	24.3311	24.3758	24.3541			0.493248	0.321183	-0.162903	0.893226
F1T0B3;A0A087X2G1;Q92499	ATP-dependent RNA helicase DDX1	F1T0B3;A0A087X2G1;Q92499	DDX1	22.2566	22.4579	22.7209	22.8503	22.4584	22.6121	22.4132	22.467	22.5705			0.386644	0.410541	-0.161803	0.893907
Q9HCD5;Q5JY17	Nuclear receptor coactivator 5	Q9HCD5	NCOA5	22.2751	21.6863	21.902	21.0321	22.5627	22.7539	20.8493	19.7702	20.4206			0.101725	0.79118	-0.161729	0.893953
E9PS41;Q6RFH5;H0YFP2	WD repeat-containing protein 74	E9PS41;Q6RFH5;H0YFP2	WDR74	21.9344	19.2918	20.693	19.3265	21.6125	21.465	19.428	19.5084	19.5076			0.0523484	0.886445	-0.161601	0.894033
F5H5I6;Q12849;H0Y8R1;H0YAK1;H0YAM1	G-rich sequence factor 1	F5H5I6;Q12849;H0Y8R1;H0YAK1	GRSF1	24.1238	23.3596	23.5628	23.3762	24.2549	23.899	22.0275	21.7912	21.9044			0.178977	0.662251	-0.161302	0.894218
P50914;E7EPB3	60S ribosomal protein L14	P50914;E7EPB3	RPL14	24.8911	24.6429	25.0358	24.951	24.8571	25.242	25.5252	25.6683	25.7821			0.418131	0.381829	-0.160065	0.894985
P09661;H0YLR3;H0YMA0;H0YKK0	U2 small nuclear ribonucleoprotein A	P09661;H0YLR3;H0YMA0	SNRPA1	21.9922	22.0224	22.204	22.2893	22.0285	22.3793	22.3563	22.3205	22.2559			0.570931	0.268577	-0.15952	0.895323
Q96QR8	Transcriptional activator protein Pur-beta	Q96QR8	PURB	21.2008	20.1365	21.6798	20.1057	21.3642	22.024	18.6202	21.4289	20.7165			0.0772438	0.837059	-0.158929	0.89569
Q9Y678;H0Y8X7;H0Y8G2	Coatomer subunit gamma-1	Q9Y678	COPG1	21.683	22.0751	22.6123	22.3956	22.0434	22.4024	23.3514	23.1644	23.099			0.206187	0.622033	-0.156975	0.896904
H0Y8C6;O00410;C9JMV5;E7ETV3;H0Y3V4;C9JZ53;E7EQT5;E7EV12	Importin-5	H0Y8C6;O00410	IPO5	21.4861	20.6962	21.621	21.532	21.6003	21.1387	21.3477	21.232	21.2493			0.184542	0.653819	-0.155916	0.897563
Q9NUQ9;A0A087X178;Q9H0Q0;E5RK61;E5RFS4;E5RHU5;E5RGI7;E5RJE1;E5RIR8;E5RJL8;E5RI16	Protein FAM49B	Q9NUQ9;A0A087X178	FAM49B	21.8429	21.8085	21.5061	21.9574	21.7319	21.9342	22.3947	22.3328	22.2054			0.531538	0.294078	-0.155363	0.897906
X6R700;Q9Y3Y2;A0A087X1B7;Q5T7Y7	Chromatin target of PRMT1 protein	X6R700;Q9Y3Y2;A0A087X1B7	CHTOP	21.4141	20.8169	21.419	21.16	21.7048	21.2404	21.4627	21.602	22.0191			0.226287	0.593899	-0.15173	0.90017
H7BXI1;A0A087WXU3;A0FGR8	Extended synaptotagmin-2	H7BXI1;A0A087WXU3;A0FGR8	ESYT2	22.4266	22.5596	23.1348	22.8331	22.8761	22.8663	23.3559	23.2678	23.3194			0.280039	0.52476	-0.151533	0.900293
K7EL66;K7ERD8;Q15555	Microtubule-associated protein RP/EB family member 2	K7EL66;K7ERD8;Q15555	MAPRE2	19.5438	19.9205	20.9865	20.3087	19.808	20.7862	20.0297	20.1029	20.1948			0.105219	0.78484	-0.150686	0.900822
P26196;Q8IV96	Probable ATP-dependent RNA helicase DDX6	P26196;Q8IV96	DDX6	23.3416	23.6388	23.0621	23.8616	22.7719	23.8577	23.1845	22.8977	23.3361			0.138549	0.726861	-0.149525	0.901547
Q9UN86;D6RGJ4;D6RAC7;D6RB17	Ras GTPase-activating protein-binding protein 2	Q9UN86	G3BP2	21.1046	21.0334	21.9134	21.3382	21.3334	21.8266	21.7776	21.3098	22.1642			0.172826	0.671698	-0.148913	0.90193
P50395;Q5SX87;V9GYJ7;V9GYF8;Q5SX90;Q5SX86;Q5SX91	Rab GDP dissociation inhibitor beta	P50395;Q5SX87	GDI2	23.9146	24.0964	23.8639	24.3712	23.8317	24.1187	24.6177	24.3798	24.6765			0.36323	0.433281	-0.148883	0.901949
Q9Y394;H0YJE4;A0A087X0Z7;H0YJ66	Dehydrogenase/reductase SDR family member 7	Q9Y394;H0YJE4;A0A087X0Z7;H0YJ66	DHRS7	20.3974	20.8873	21.112	20.5899	21.8988	20.3505	21.3418	20.2797	19.9857			0.100824	0.792822	-0.147507	0.902809
C9JA36;P54709;H7C4L9;C9JXZ1	Sodium/potassium-transporting ATPase subunit beta-3	C9JA36;P54709;H7C4L9;C9JXZ1	ATP1B3	20.8594	21.2669	19.0708	19.0137	21.3711	21.2522	21.4708	21.415	22.5246			0.0492661	0.892758	-0.146646	0.903348
P62495;B7Z7P8;D6RCB3;D6RJE8;I3L492	Eukaryotic peptide chain release factor subunit 1	P62495;B7Z7P8	ETF1	20.427	19.9456	21.5639	20.4037	20.0857	21.887	20.8416	20.9995	20.7163			0.0698972	0.851339	-0.146632	0.903357
Q13242;H0YIB4;S4R3G0	Serine/arginine-rich splicing factor 9	Q13242;H0YIB4;S4R3G0	SRSF9	22.5501	22.2124	22.5593	22.6373	23.5846	21.5387	21.7935	21.7989	22.1222			0.0861907	0.819991	-0.146273	0.903582
E9PJD9;E9PLL6;P46776;E9PLX7	60S ribosomal protein L27a	E9PJD9;E9PLL6;P46776;E9PLX7	RPL27A	24.9044	24.5023	24.2605	25.1276	24.4927	24.4813	24.7565	24.8234	24.9202			0.195608	0.637371	-0.14482	0.904492
P08708;H0YN88;A0A075B716;H0YN73	40S ribosomal protein S17	P08708;H0YN88;A0A075B716	RPS17	22.1057	22.7394	22.3977	23.3659	22.3411	21.9651	23.1525	23.2158	23.5862			0.113647	0.769755	-0.14311	0.905565
A2A2D0;P16949;E5RGX5;Q93045	Stathmin	A2A2D0;P16949	STMN1	20.3729	21.8024	22.4825	21.4757	21.7841	21.8272	22.0744	22.4338	22.0838			0.0799101	0.831936	-0.143004	0.905631
G3V4W0;B4DY08;B2R5W2;G3V4C1;G3V2Q1;P07910;G3V576;G3V555;G3V575;G3V5X6;G3V3K6;G3V251;B4DSU6;G3V4M8;G3V5V7;G3V2D6;G3V2H6;A0A0G2JPF8;A0A0G2JNQ3;P0DMR1;O60812;B7ZW38;B2RXH8	Heterogeneous nuclear ribonucleoproteins C1/C2	G3V4W0;B4DY08;B2R5W2;G3V4C1;G3V2Q1;P07910;G3V576;G3V555;G3V575;G3V5X6;G3V3K6;G3V251;B4DSU6	HNRNPC	25.6145	25.7052	25.5699	25.7532	25.6854	25.8719	25.4264	25.1541	25.236			0.973896	0.106195	-0.140294	0.907334
Q14444;E9PLA9;G3V153;A0A087X082	Caprin-1	Q14444;E9PLA9;G3V153;A0A087X082	CAPRIN1	24.7703	24.4361	25.0161	24.3535	25.1912	25.097	22.7023	22.8529	22.518			0.168077	0.679084	-0.139742	0.907682
O75964;E9PN17	ATP synthase subunit g, mitochondrial	O75964;E9PN17	ATP5L	23.2933	22.7712	23.9863	24.1865	22.9746	23.3073	23.7249	24.2565	23.3302			0.0988939	0.796354	-0.139152	0.908053
A6NEM2;P51610;H7C1C4	Host cell factor 1;HCF N-terminal chain 1;HCF N-terminal chain 2;HCF N-terminal chain 3;HCF N-terminal chain 4;HCF N-terminal chain 5;HCF N-terminal chain 6;HCF C-terminal chain 1;HCF C-terminal chain 2;HCF C-terminal chain 3;HCF C-terminal chain 4;HCF C-terminal chain 5;HCF C-terminal chain 6	A6NEM2;P51610	HCFC1	23.5853	23.6869	23.5629	23.8704	23.5518	23.8251	23.7611	23.6974	23.8795			0.573831	0.26679	-0.137414	0.909148
Q9NZI8;F8W930;Q9Y6M1	Insulin-like growth factor 2 mRNA-binding protein 1	Q9NZI8	IGF2BP1	26.5195	26.4542	26.4067	26.1775	26.9859	26.6218	24.0346	24.1287	24.1932			0.223256	0.598059	-0.134956	0.910698
Q29RF7;H0Y9L6	Sister chromatid cohesion protein PDS5 homolog A	Q29RF7	PDS5A	21.9925	21.7209	21.5262	21.4579	22.2414	21.9386	22.1223	22.3794	22.2734			0.191882	0.642862	-0.132783	0.912071
P51149;C9J592;C9J8S3;C9IZZ0;C9J4V0;C9J4S4;C9J7D1	Ras-related protein Rab-7a	P51149;C9J592;C9J8S3;C9IZZ0;C9J4V0	RAB7A	24.3449	24.3889	24.2984	24.5715	24.3241	24.5349	24.8049	24.7365	24.9084			0.749013	0.178232	-0.13278	0.912072
H3BRU6;F8VZX2;Q15366;F8W0G4;F8VXH9;F8W1G6;J3QT27;E9PFP8;P57721;F8VRH0;H3BSS4;H3BND9	Poly(rC)-binding protein 2;Poly(rC)-binding protein 3	H3BRU6;F8VZX2;Q15366;F8W0G4;F8VXH9;F8W1G6;J3QT27;E9PFP8;P57721	PCBP2;PCBP3	24.8287	24.801	24.9756	25.1184	24.8547	25.0261	25.0906	25.1476	25.0995			0.626279	0.23644	-0.131307	0.913004
O43242	26S proteasome non-ATPase regulatory subunit 3	O43242	PSMD3	23.0802	23.1342	22.9937	23.3879	22.8959	23.3178	23.2002	23.4847	23.5206			0.341353	0.455666	-0.131184	0.913082
O14980;C9JKM9;H7BZC5;C9IZS4;C9JQ02;C9JV99;C9J673;F8WF71;C9JF49;C9IYM2	Exportin-1	O14980	XPO1	22.2118	22.3903	22.3418	22.4499	22.376	22.5108	22.8117	22.8676	23.1492			0.92626	0.118506	-0.130905	0.913258
F5GXX5;P61803;F5H895;A0A0B4J239	Dolichyl-diphosphooligosaccharide--protein glycosyltransferase subunit DAD1	F5GXX5;P61803;F5H895;A0A0B4J239	DAD1	22.9053	22.7573	22.9101	23.0193	22.8929	23.0394	23.1445	23.0036	22.9326			0.864568	0.136594	-0.126314	0.91617
Q60FE5;P21333;Q5HY54;A0A087WWY3;F8WE98;H0Y5C6;H0Y5F3	Filamin-A	Q60FE5;P21333;Q5HY54;A0A087WWY3	FLNA	26.9286	26.8643	26.9887	27.1276	26.9216	27.1108	27.1592	27.2461	27.4301			0.772895	0.168696	-0.12612	0.916293
P62304;A6NHK2	Small nuclear ribonucleoprotein E	P62304;A6NHK2	SNRPE	21.1196	21.2628	21.6492	20.8912	21.3771	22.1356	22.3368	21.3516	20.4431			0.113989	0.76915	-0.12411	0.91757
P26640;A0A140T936;A0A140T954;A2ABF4;A0A0G2JJT9;A0A140T904;H0Y426	Valine--tRNA ligase	P26640;A0A140T936	VARS	22.8216	22.9911	23.2499	23.2967	23.0115	23.1258	23.6485	23.7229	23.7699			0.342411	0.454558	-0.12376	0.917793
M0R117;Q02543;M0R3D6;M0R1A7;M0R0P7	60S ribosomal protein L18a	M0R117;Q02543;M0R3D6;M0R1A7;M0R0P7	RPL18A	25.4408	25.4431	25.5861	25.5783	25.7543	25.5059	25.7716	25.7668	25.819			0.628361	0.235309	-0.122846	0.918374
Q9H307;G3V5F0;G3V579	Pinin	Q9H307	PNN	22.7435	22.8962	22.5807	22.8301	22.7741	22.9799	22.4737	22.6945	23.4174			0.479138	0.331789	-0.121224	0.919407
O43809;H3BND3;H3BV41	Cleavage and polyadenylation specificity factor subunit 5	O43809;H3BND3	NUDT21	21.8927	21.7911	22.151	22.0931	21.8402	22.2637	22.6117	21.5963	22.1197			0.300821	0.50024	-0.120761	0.919702
G3V279;P84090	Enhancer of rudimentary homolog	G3V279;P84090	ERH	23.4875	23.6949	23.9567	23.8909	23.8722	23.7362	23.4662	23.7355	23.6784			0.344973	0.451884	-0.120085	0.920133
Q92947;K7EKT3;K7ES74	Glutaryl-CoA dehydrogenase, mitochondrial	Q92947;K7EKT3	GCDH	21.5023	21.234	21.3058	20.6235	21.7372	22.0384	20.4214	20.008	20.226			0.0973482	0.799193	-0.118994	0.920829
A0A0D9SFB3;A0A0D9SG12;A0A0D9SF53;O00571;O15523;A0A0J9YVQ7;A0A087WVZ1;C9J081;D6RCM4;Q9NQI0;C9J8G5;H0Y960	ATP-dependent RNA helicase DDX3X;ATP-dependent RNA helicase DDX3Y	A0A0D9SFB3;A0A0D9SG12;A0A0D9SF53;O00571;O15523	DDX3X;DDX3Y	23.9657	23.6507	23.7353	23.7458	23.9494	24.0132	23.267	23.3603	23.3377			0.407062	0.391686	-0.118901	0.920889
M0QYS1;P40429;Q8J015;Q6NVV1;M0QZU1;A0A096LPE0	60S ribosomal protein L13a	M0QYS1;P40429;Q8J015	RPL13A;RPL13a	24.9647	25.0169	24.6358	25.0483	24.7555	25.1686	25.4731	25.5586	25.4878			0.278013	0.527214	-0.118333	0.921251
P49755;G3V2K7	Transmembrane emp24 domain-containing protein 10	P49755;G3V2K7	TMED10	21.9945	22.0752	22.7395	22.7296	21.9008	22.5294	22.7198	22.6481	22.4937			0.12445	0.750844	-0.116879	0.922181
P51991;H7C1J8	Heterogeneous nuclear ribonucleoprotein A3	P51991	HNRNPA3	24.6082	24.6455	24.7714	24.5765	24.94	24.8478	24.0881	23.7692	23.9315			0.399457	0.398605	-0.113035	0.924641
A0A087WWS1;Q96FV9;J3KT14;R4GMN4;J3KRD7;J3QQZ3;A0A087WY84	THO complex subunit 1	A0A087WWS1;Q96FV9	THOC1	20.2947	21.1916	21.0499	20.9764	21.3981	20.4983	20.8088	21.6677	21.2572			0.106299	0.78289	-0.112237	0.925152
G5EA31;P53992	Protein transport protein Sec24C	G5EA31;P53992	SEC24C	21.9872	21.287	21.6039	21.4554	21.9206	21.8383	22.0691	22.1738	22.1736			0.170797	0.674843	-0.112067	0.925262
Q9NX40;D6RG39;D6RIT9;D6RDK6;D6RBN5;D6R918;D6RBC5;D6RDI5;D6RI08;D6RA54;D6RC55;D6RDK1;D6RIV2;D6R9T5	OCIA domain-containing protein 1	Q9NX40;D6RG39;D6RIT9;D6RDK6;D6RBN5	OCIAD1	21.9332	20.0929	20.9109	20.4317	21.1227	21.7154	20.6907	20.5616	20.7462			0.059239	0.872491	-0.110978	0.92596
Q9Y3U8;J3QSB5;J3KTD3	60S ribosomal protein L36	Q9Y3U8;J3QSB5	RPL36	23.5269	23.0599	23.0755	23.2673	23.2292	23.497	23.5148	23.2674	23.55			0.250717	0.561413	-0.110376	0.926347
H0Y3P2;D3DQV9;P78344;H0YCH5;H0YEC5;H0YD77;E9PKF8;H0YD99;H0YEN8;H0YDC0;H0YCF8;H0YE22	Eukaryotic translation initiation factor 4 gamma 2	H0Y3P2;D3DQV9;P78344;H0YCH5	EIF4G2	21.7527	21.5928	22.2645	21.8661	21.8534	22.2211	22.6928	22.736	22.6344			0.177536	0.664452	-0.11021	0.926453
Q08211	ATP-dependent RNA helicase A	Q08211	DHX9	25.947	25.9777	25.605	25.858	25.961	26.0331	26.0307	26.0894	26.1965			0.342663	0.454294	-0.107459	0.928222
Q9UNM6;A0A087WUL9;E9PL38;J3KNQ3;H0YD73	26S proteasome non-ATPase regulatory subunit 13	Q9UNM6;A0A087WUL9;E9PL38;J3KNQ3;H0YD73	PSMD13	21.846	21.7752	21.8333	21.7922	22.0711	21.9096	22.2305	22.3039	22.2252			0.562454	0.273871	-0.106105	0.929093
I3L3Q7;I3L3B0;Q07021	Complement component 1 Q subcomponent-binding protein, mitochondrial	I3L3Q7;I3L3B0;Q07021	C1QBP	20.9108	19.7006	20.1352	20.0764	20.9673	20.0189	19.2604	19.0551	19.5196			0.0792648	0.833173	-0.105316	0.929601
P26373;J3QSB4;J3KS98;H3BUK8;H3BTH3	60S ribosomal protein L13	P26373;J3QSB4	RPL13	26.1712	25.4665	25.8697	25.6544	26.0874	26.0809	26.2543	26.3185	26.4766			0.157928	0.695139	-0.105087	0.929749
P27694;I3L4R8	Replication protein A 70 kDa DNA-binding subunit;Replication protein A 70 kDa DNA-binding subunit, N-terminally processed	P27694	RPA1	23.6841	23.4276	23.4085	23.6916	23.4463	23.6967	23.6888	23.3065	23.472			0.36003	0.436486	-0.104786	0.929943
Q9Y224;H0YJB9;G3V4C6	UPF0568 protein C14orf166	Q9Y224	C14orf166	21.5234	21.5687	21.8338	21.9046	21.515	21.8206	21.9215	21.6031	21.8081			0.274938	0.53096	-0.104764	0.929957
Q13596;H0YK42;H0YK43	Sorting nexin-1	Q13596;H0YK42	SNX1	21.0964	21.2794	20.8359	21.1845	21.0356	21.3052	21.2381	21.2868	21.592			0.279491	0.525423	-0.104537	0.930104
H3BPG5;H3BV80;H3BMS0;H3BMM9;H3BTC0;Q15287	RNA-binding protein with serine-rich domain 1	H3BPG5;H3BV80;H3BMS0;H3BMM9;H3BTC0;Q15287	RNPS1	23.6938	23.9692	23.6337	23.8425	24.0447	23.7202	23.5394	23.4634	23.7354			0.300301	0.50084	-0.103544	0.930744
Q5VZU9;P29144	Tripeptidyl-peptidase 2	Q5VZU9;P29144	TPP2	21.0682	21.3289	20.7779	21.2503	20.8008	21.4338	21.5175	21.6915	21.7382			0.157056	0.696536	-0.103299	0.930902
P31350;C9JXC1	Ribonucleoside-diphosphate reductase subunit M2	P31350;C9JXC1	RRM2	21.0018	20.0498	21.0683	21.0923	20.7009	20.6309	20.4025	21.1791	21.3477			0.101537	0.791523	-0.101425	0.932112
P52732	Kinesin-like protein KIF11	P52732	KIF11	21.252	21.9299	20.9833	21.7277	21.4067	21.3309	21.7611	21.7398	22.1544			0.118727	0.760805	-0.0999985	0.933034
Q14697;F5H6X6;E9PKU7;E9PNH1	Neutral alpha-glucosidase AB	Q14697;F5H6X6;E9PKU7	GANAB	24.2738	24.1598	24.442	24.6232	24.1085	24.4427	24.9011	24.8285	24.8769			0.226995	0.592932	-0.0995452	0.933327
O75131;A0A087WYQ3;H0YB26;E5RFT7;A0A087WUS8;A0A087WXR6;E5RHZ0	Copine-3	O75131;A0A087WYQ3	CPNE3	20.2638	21.0419	21.3359	21.098	20.8894	20.9523	20.7752	20.5839	21.1037			0.110377	0.775573	-0.0993621	0.933446
Q8NBY1;B4E0Y9;Q9P289	Serine/threonine-protein kinase 26	Q8NBY1;B4E0Y9;Q9P289	STK26	21.2034	20.2862	20.689	20.6484	20.9139	20.9063	21.2487	21.489	21.1046			0.126845	0.746716	-0.0966873	0.935178
P63092;Q5JWF2;S4R3E3;A0A087WTB6;A2A2R6;Q5JWD1;H0Y7E8;A0A087WZE5;A0A0A0MR13;Q5JWE9;H0Y7F4;P38405	Guanine nucleotide-binding protein G(s) subunit alpha isoforms short;Guanine nucleotide-binding protein G(s) subunit alpha isoforms XLas	P63092;Q5JWF2;S4R3E3	GNAS	22.4473	22.0886	22.1195	22.07	22.3455	22.5286	22.4718	23.0196	22.7577			0.212243	0.613418	-0.0962302	0.935474
P04899	Guanine nucleotide-binding protein G(i) subunit alpha-2	P04899	GNAI2	24.7818	24.9233	23.8372	24.8905	24.2428	24.6947	25.2641	25.0441	25.0521			0.0863843	0.819626	-0.0952269	0.936125
Q13423;E9PCX7;D6RHU2;D6RAI5;H0Y8P5;D6RCR6	NAD(P) transhydrogenase, mitochondrial	Q13423;E9PCX7	NNT	25.2359	25.1532	24.3951	24.8684	25.1312	25.0637	24.9051	24.8096	25.0439			0.121793	0.755452	-0.0930322	0.93755
P38919;I3L3H2;E9PBH4;F8WE11	Eukaryotic initiation factor 4A-III;Eukaryotic initiation factor 4A-III, N-terminally processed	P38919	EIF4A3	23.3372	23.2432	23.3399	23.6909	22.9371	23.5709	23.3298	23.4759	23.6134			0.146399	0.71384	-0.0929286	0.937618
O75369;E7EN95;A0A0A0MT44;A0A0C4DGA1;H7C5L4	Filamin-B	O75369;E7EN95	FLNB	24.4618	24.2203	24.2819	24.349	24.3605	24.5319	24.5069	24.7455	24.8039			0.421761	0.378651	-0.0924816	0.937908
A0A087WVQ6;Q00610;J3KS13;A0A087WX41;P53675;K7EJJ5;J3KSQ2;J3KRF5;F5H5N6	Clathrin heavy chain;Clathrin heavy chain 1	A0A087WVQ6;Q00610	CLTC	24.372	24.9562	25.1787	24.9809	24.9778	24.8205	25.3832	25.325	25.5777			0.135966	0.731196	-0.0907542	0.939032
J3QR09;J3KTE4;P84098;J3QL15	Ribosomal protein L19;60S ribosomal protein L19	J3QR09;J3KTE4;P84098;J3QL15	RPL19	24.6983	24.3435	23.6432	24.3567	24.401	24.1994	24.6891	24.7546	24.5846			0.103304	0.788308	-0.0907052	0.939064
I3L4J1;Q9UN37;Q6PIW4	Vacuolar protein sorting-associated protein 4A;Fidgetin-like protein 1	I3L4J1;Q9UN37;Q6PIW4	VPS4A;FIGNL1	20.5657	20.625	20.7791	20.6425	20.9255	20.6731	20.7402	20.6512	20.6738			0.340338	0.456732	-0.0904566	0.939225
P29401;A0A0B4J1R6;E9PFF2;F8W888;F8WAX4	Transketolase	P29401;A0A0B4J1R6;E9PFF2	TKT	24.8099	25.3965	25.4468	25.3917	25.0556	25.4761	25.8544	25.8575	25.8536			0.137889	0.727965	-0.090093	0.939462
Q9ULW0	Targeting protein for Xklp2	Q9ULW0	TPX2	21.9648	22.5913	21.9168	22.3284	21.8496	22.5568	22.6733	22.4782	22.7889			0.104424	0.786278	-0.0872809	0.941295
Q96HS1;F5GXG4	Serine/threonine-protein phosphatase PGAM5, mitochondrial	Q96HS1	PGAM5	21.7531	21.7469	22.3075	23.3889	21.9691	20.7062	22.4533	22.8555	21.9978			0.0363732	0.919659	-0.0855637	0.942416
A0A0U1RQF0;P49327;J3KTF0;A0A0U1RRG3	Fatty acid synthase;[Acyl-carrier-protein] S-acetyltransferase;[Acyl-carrier-protein] S-malonyltransferase;3-oxoacyl-[acyl-carrier-protein] synthase;3-oxoacyl-[acyl-carrier-protein] reductase;3-hydroxyacyl-[acyl-carrier-protein] dehydratase;Enoyl-[acyl-carrier-protein] reductase;Oleoyl-[acyl-carrier-protein] hydrolase	A0A0U1RQF0;P49327	FASN	24.5854	24.1616	24.7782	24.5636	24.2178	24.999	25.1219	25.1641	25.2927			0.10564	0.784079	-0.0850455	0.942755
O75643;B4E0P5	U5 small nuclear ribonucleoprotein 200 kDa helicase	O75643	SNRNP200	24.2476	24.2794	24.2101	24.278	24.1907	24.5189	24.6088	24.5338	24.6694			0.345538	0.451297	-0.0835203	0.943752
O94906	Pre-mRNA-processing factor 6	O94906	PRPF6	22.2902	22.07	22.0237	22.2371	22.2138	22.1802	22.8544	22.5569	22.5327			0.418592	0.381424	-0.0823816	0.944497
P52272;A0A087X0X3;M0QZM1;M0R2I7;M0R019;M0R2T0;M0QY96;M0R0N3;M0QYQ7;M0QYL3;M0R0Y6	Heterogeneous nuclear ribonucleoprotein M	P52272;A0A087X0X3;M0QZM1	HNRNPM	26.1014	25.618	26.0197	25.9366	26.1012	25.9457	25.7178	25.7659	25.9269			0.197466	0.634649	-0.081473	0.945092
Q16531;F5GY55;F5H2L3;F5GWI0;F5GZY8;F5GYG8;F5H198	DNA damage-binding protein 1	Q16531;F5GY55	DDB1	24.2572	23.538	23.7585	24.0726	23.7801	23.9438	24.3068	24.3672	24.5429			0.129793	0.741665	-0.0809034	0.945465
P51148;K7ERI8;K7ERQ8;F8VVK3;K7ENY4;K7EIP6	Ras-related protein Rab-5C	P51148;K7ERI8;K7ERQ8;F8VVK3;K7ENY4	RAB5C	23.0149	23.3608	23.0703	23.1525	23.056	23.4743	23.7968	23.6122	23.681			0.181112	0.659004	-0.0789064	0.946775
Q07666	KH domain-containing, RNA-binding, signal transduction-associated protein 1	Q07666	KHDRBS1	21.1341	20.8825	22.0105	21.4869	21.5553	21.2216	21.1847	21.2207	21.1465			0.0778895	0.835816	-0.0788816	0.946791
O00483	Cytochrome c oxidase subunit NDUFA4	O00483	NDUFA4	21.1036	20.8878	20.3074	19.5216	20.5779	22.4342	20.1348	20.8381	20.8224			0.029814	0.933654	-0.0783157	0.947163
J3QRS3;P19105;O14950;P24844;J3KTJ1	Myosin regulatory light chain 12A;Myosin regulatory light chain 12B;Myosin regulatory light polypeptide 9	J3QRS3;P19105;O14950;P24844	MYL12A;MYL12B;MYL9	21.3104	21.735	22.4855	21.7265	22.6915	21.3474	22.1479	22.5531	22.3946			0.0509394	0.889325	-0.0781759	0.947255
Q06124	Tyrosine-protein phosphatase non-receptor type 11	Q06124	PTPN11	20.4019	20.0747	20.2325	20.3256	19.5496	21.067	20.4479	20.5066	21.4148			0.0601346	0.870694	-0.0777454	0.947537
Q9BXP5;H7C3A1;H7C1K0;H7C0U8	Serrate RNA effector molecule homolog	Q9BXP5;H7C3A1	SRRT	21.5716	21.7423	21.3204	21.3267	21.6334	21.9016	21.826	21.8956	21.9088			0.135531	0.731929	-0.0758235	0.9488
Q06210;O94808	Glutamine--fructose-6-phosphate aminotransferase [isomerizing] 1	Q06210	GFPT1	21.442	22.2335	21.7096	22.2366	21.3002	22.0746	22.5249	22.0864	22.7157			0.0712422	0.848707	-0.0754503	0.949046
P07741;H3BQF1;H3BQZ9;H3BQB1;H3BSW3	Adenine phosphoribosyltransferase	P07741;H3BQF1;H3BQZ9;H3BQB1;H3BSW3	APRT	22.7407	22.1725	22.3298	22.7244	22.2276	22.5168	21.8997	22.1882	22.0583			0.123756	0.752046	-0.0752532	0.949176
A0A087X2I1;P62333;H0YJC0;H0YJS8;H0YJE9;H0YJT1	26S protease regulatory subunit 10B	A0A087X2I1;P62333;H0YJC0	PSMC6	19.3705	20.4426	20.9762	20.2979	19.9092	20.8078	20.5256	20.6217	20.6286			0.0477909	0.895796	-0.0752068	0.949206
Q16543;K7EL68;K7EQA9;K7EKQ2;K7EIU0	Hsp90 co-chaperone Cdc37;Hsp90 co-chaperone Cdc37, N-terminally processed	Q16543;K7EL68;K7EQA9	CDC37	22.1558	22.4347	22.4573	22.6839	22.579	22.0095	22.0329	22.2207	22.6571			0.118035	0.762018	-0.0748539	0.949438
P60228;E5RIT4;H0YBR5;E5RGA2;E5RHS5;H0YAW4;E5RIP5;E5RJ25;E5RII3	Eukaryotic translation initiation factor 3 subunit E	P60228;E5RIT4;H0YBR5;E5RGA2	EIF3E	23.4853	23.3235	22.3301	23.3672	23.0618	22.931	23.3624	23.6498	23.7177			0.0670566	0.856926	-0.0737343	0.950175
Q14694;J3KT19	Ubiquitin carboxyl-terminal hydrolase 10	Q14694;J3KT19	USP10	20.604	21.588	21.3651	20.7659	21.6566	21.351	21.0052	20.6262	20.883			0.0632553	0.86446	-0.072106	0.951248
Q13151	Heterogeneous nuclear ribonucleoprotein A0	Q13151	HNRNPA0	21.3869	20.9465	21.9672	21.0729	21.6813	21.7572	20.9661	20.5004	21.0877			0.0669036	0.857228	-0.070282	0.952452
Q9NZB2;A0A0C4DG79;A0A0C4DH52;Q5T035	Constitutive coactivator of PPAR-gamma-like protein 1	Q9NZB2	FAM120A	27.0437	27.071	27.0292	26.7667	27.4047	27.1803	23.493	23.6023	23.7617			0.13653	0.730248	-0.0692514	0.953132
Q12907;D6RBV2;D6RIU4;D6RDX1;D6RBH1	Vesicular integral-membrane protein VIP36	Q12907;D6RBV2;D6RIU4	LMAN2	22.5649	22.657	23.0864	23.4007	22.5522	22.5543	23.4966	23.3765	23.284			0.071456	0.848289	-0.0663064	0.95508
O43390;B4DT28	Heterogeneous nuclear ribonucleoprotein R	O43390;B4DT28	HNRNPR	28.4099	28.6386	28.3403	28.2439	28.7161	28.6261	25.8351	25.6345	25.878			0.143059	0.719351	-0.0657609	0.955441
P62241;Q5JR95	40S ribosomal protein S8	P62241;Q5JR95	RPS8	26.74	26.746	26.6068	26.7201	26.6713	26.8898	27.2819	27.273	27.4547			0.320802	0.477747	-0.0628242	0.957388
P55265;H0YCK3	Double-stranded RNA-specific adenosine deaminase	P55265;H0YCK3	ADAR	21.7241	21.7919	22.1049	22.0591	21.6317	22.117	21.9663	22.2337	22.403			0.117578	0.762821	-0.0622927	0.957741
P39748;I3L3E9;F5H1Y3	Flap endonuclease 1	P39748;I3L3E9;F5H1Y3	FEN1	23.2171	23.1093	23.0378	23.4437	22.8914	23.2142	23.3117	23.5568	23.4835			0.135085	0.732681	-0.0617046	0.958131
P30040;F8VY02;F8W1G0	Endoplasmic reticulum resident protein 29	P30040;F8VY02	ERP29	23.0256	23.9363	24.2364	23.9353	23.7003	23.7478	23.9515	23.5371	23.8472			0.057485	0.876022	-0.0616868	0.958143
O43290;E9PQI8	U4/U6.U5 tri-snRNP-associated protein 1	O43290	SART1	21.8754	21.7053	21.9705	21.9158	21.8856	21.9263	21.9528	22.4017	22.5156			0.305175	0.495251	-0.0588379	0.960037
P78527;H0YG84	DNA-dependent protein kinase catalytic subunit	P78527	PRKDC	25.3441	25.276	25.1883	25.2966	25.173	25.5137	25.6724	25.8152	25.8241			0.206041	0.622241	-0.0582733	0.960413
P39023;G5E9G0;B5MCW2;H7C422;H7C3M2;F8WCR1;Q92901	60S ribosomal protein L3	P39023;G5E9G0;B5MCW2;H7C422	RPL3	25.146	24.7113	25.2114	25.1697	25.1215	24.9511	25.4663	25.2208	25.4874			0.124264	0.751165	-0.0578798	0.960675
Q86YP4;C9JVY3;V9GY85;H7C3H1;C9JMI3;C9JGN4;C9JHD7;C9JJK9;V9GYX5	Transcriptional repressor p66-alpha	Q86YP4	GATAD2A	21.5211	21.6964	21.8719	21.4705	21.8958	21.8892	22.1855	21.9866	22.1845			0.116156	0.765321	-0.0553894	0.962335
P20042	Eukaryotic translation initiation factor 2 subunit 2	P20042	EIF2S2	21.1395	21.278	20.9744	20.8499	21.4092	21.2955	21.8439	21.576	21.8798			0.101636	0.791342	-0.0542723	0.96308
P04618		P04618		24.755	24.0978	24.0164	24.0781	24.4303	24.5205	24.1164	24.3911	23.9431			0.0688522	0.85339	-0.0532023	0.963795
B0QY89;Q9Y262;B0QY90;C9JHP4;C9K0Q7;H7C3A0	Eukaryotic translation initiation factor 3 subunit L	B0QY89;Q9Y262;B0QY90	EIF3L	21.7578	22.1144	22.5814	21.8083	22.5169	22.2825	22.473	22.727	23.078			0.0559809	0.879061	-0.0513465	0.965035
O15067;H0YGH1;J3KTQ5;J3KT98	Phosphoribosylformylglycinamidine synthase	O15067	PFAS	21.8756	22.1669	21.2895	21.4624	21.9564	22.0668	22.2079	22.3157	22.8126			0.0555927	0.879847	-0.0512129	0.965125
P17812	CTP synthase 1	P17812	CTPS1	20.6687	21.6699	22.5619	22.3107	20.4027	22.3357	22.9431	22.7359	22.6822			0.0195937	0.955886	-0.049558	0.966232
P04083;Q5T3N1;Q5T3N0	Annexin A1;Annexin	P04083;Q5T3N1	ANXA1	24.0345	24.6823	23.9796	24.5234	23.9907	24.329	26.6436	24.4392	24.6497			0.0619423	0.867077	-0.0489012	0.966672
Q9HB71;B2ZWH1	Calcyclin-binding protein	Q9HB71	CACYBP	23.1936	24.126	24.5133	24.1534	23.8775	23.9481	23.9642	24.219	24.2696			0.0414842	0.908899	-0.0487728	0.966758
K7EK42;Q99426;K7EP07;K7EL99;K7EQH0;K7ER04	Tubulin-folding cofactor B	K7EK42;Q99426;K7EP07;K7EL99	TBCB	20.7737	20.3328	21.2775	20.5157	21.0973	20.9167	20.9626	20.9492	20.9276			0.0518136	0.887537	-0.0485929	0.966879
E7EQR4;P15311;E9PQ82;E9PNV3	Ezrin	E7EQR4;P15311	EZR	21.379	20.5969	22.0285	20.6925	21.4016	22.0532	21.1386	21.9188	21.297			0.028025	0.937508	-0.0476201	0.967531
D6RAN4;P32969;E7ESE0;H0Y9V9;H0Y9R4	60S ribosomal protein L9	D6RAN4;P32969;E7ESE0;H0Y9V9	RPL9	25.156	25.2833	25.0347	25.1494	25.1886	25.2788	25.6174	25.1869	25.4483			0.22932	0.589767	-0.0476062	0.96754
P82979;F8VZQ9;H0YHG0;F8VS12	SAP domain-containing ribonucleoprotein	P82979;F8VZQ9;H0YHG0	SARNP	22.5622	22.0622	23.0101	22.3178	22.8313	22.6262	22.5305	22.6153	22.3223			0.0517512	0.887664	-0.0469233	0.967998
P61978;Q5T6W2;S4R359;S4R457	Heterogeneous nuclear ribonucleoprotein K	P61978;Q5T6W2	HNRNPK	27.3113	27.2843	27.4009	27.1841	27.4902	27.4582	26.8157	26.8152	26.8173			0.165385	0.683306	-0.0453637	0.969045
P46777;Q5T7N0	60S ribosomal protein L5	P46777	RPL5	24.6015	24.6606	25.5005	24.902	24.9444	25.0487	25.2503	25.3046	25.0956			0.0517816	0.887602	-0.0442015	0.969826
P22234;E9PBS1;D6RF62	Multifunctional protein ADE2;Phosphoribosylaminoimidazole-succinocarboxamide synthase;Phosphoribosylaminoimidazole carboxylase	P22234;E9PBS1;D6RF62	PAICS	25.2123	25.1724	25.0818	25.4021	24.9479	25.2434	25.7076	25.7236	25.6303			0.110506	0.775343	-0.042312	0.971097
A0A087WZZ5;Q13435;E9PPJ0;E9PJ04;H0YCG1;E9PJT3;H0YEX5;E9PIL8	Splicing factor 3B subunit 2	A0A087WZZ5;Q13435;E9PPJ0	SF3B2	23.517	23.6583	23.589	23.6363	23.4786	23.7736	24.3993	24.3343	24.3867			0.165223	0.683561	-0.0414454	0.971681
P23634;P20020;E7ERY9;Q16720;H0Y7S3;Q01814	Plasma membrane calcium-transporting ATPase 4;Plasma membrane calcium-transporting ATPase 1	P23634;P20020	ATP2B4;ATP2B1	22.2897	21.8779	21.9357	21.9829	21.9672	22.268	22.3108	22.4343	22.6836			0.0838641	0.824396	-0.0382868	0.973811
Q15459;H7C1L2;F8WC79;F8WB66	Splicing factor 3A subunit 1	Q15459	SF3A1	22.8213	23.1913	23.4912	23.3685	23.0588	23.1847	23.3342	23.4427	23.6914			0.0584315	0.874115	-0.0360616	0.975314
A0A0A6YYC3;A0A0A6YYJ8;Q9Y383;B8ZZ12	Putative RNA-binding protein Luc7-like 2	A0A0A6YYC3;A0A0A6YYJ8;Q9Y383	C7orf55-LUC7L2;LUC7L2	24.582	24.3465	24.4098	24.3283	24.7035	24.4085	24.3481	24.3706	24.5945			0.0902931	0.812282	-0.033994	0.976713
P52907;A0A0D9SET8	F-actin-capping protein subunit alpha-1	P52907	CAPZA1	23.214	23.1867	24.354	23.6991	23.3582	23.7982	23.796	23.8641	23.835			0.0277058	0.938197	-0.0335897	0.976986
Q14739;C9JXK0;C9JES9	Lamin-B receptor	Q14739	LBR	23.3411	22.9608	23.0035	23.1996	22.9927	23.2139	23.2895	22.9455	23.3791			0.0850897	0.822073	-0.033589	0.976987
P25786;F5GX11;B4DEV8	Proteasome subunit alpha type-1	P25786;F5GX11	PSMA1	23.6761	23.8961	23.9039	23.7326	23.8083	24.032	23.6134	23.5973	23.852			0.0992247	0.795747	-0.0323302	0.97784
K7ERI7;P35268;K7EP65;K7EKS7;K7ELC4;K7EMH1;K7EJT5	60S ribosomal protein L22	K7ERI7;P35268;K7EP65;K7EKS7;K7ELC4;K7EMH1;K7EJT5	RPL22	25.3298	25.4095	25.3011	25.4281	25.2958	25.4115	25.175	24.9979	25.192			0.235922	0.580868	-0.0316563	0.978297
P50148;B1AM21;O95837;P29992	Guanine nucleotide-binding protein G(q) subunit alpha	P50148;B1AM21	GNAQ	20.8586	20.5247	20.2947	21.0145	20.8836	19.873	20.8416	21.646	21.3291			0.0262577	0.941331	-0.0310237	0.978726
D6RAX7;D6RFN0;Q9BT78;D6RD63	COP9 signalosome complex subunit 4	D6RAX7;D6RFN0;Q9BT78	COPS4	20.6679	20.8366	21.9588	21.3024	21.2824	20.9713	21.3242	21.7825	21.2306			0.0247193	0.944671	-0.0309499	0.978776
E5RI99;P62888;A0A0B4J213;E5RJH3;A0A0C4DH44	60S ribosomal protein L30	E5RI99;P62888	RPL30	24.2804	23.7937	24.5087	24.5669	23.8353	24.273	24.4966	24.6448	24.7158			0.0347399	0.923124	-0.0307566	0.978907
Q13838;Q5STU3;A0A0G2JJZ9;F6S4E6;A0A0A0MT12;F6TRA5;F6WLT2;A0A140T9X3;A0A140T9L4;A0A140T973;A0A140T9K1;F6QYI9;A0A0G2JJL7;A0A140T996;F6R6M7;K7EN69;A0A140T9X9;H0Y400;F6UJC5;A0A140TA18;A0A140T9K2;K7ENP6;A0A0G2JHN7;A0A140T9N3;K7EL56;K7EIL8;F6U6E2;F6S2B7;F6SXL5	Spliceosome RNA helicase DDX39B	Q13838;Q5STU3;A0A0G2JJZ9;F6S4E6;A0A0A0MT12;F6TRA5;F6WLT2;A0A140T9X3	DDX39B	24.3619	24.0278	24.8102	24.3663	24.1706	24.7537	24.7026	24.6637	24.8176			0.0360956	0.920247	-0.0302849	0.979227
P06400	Retinoblastoma-associated protein	P06400	RB1	22.2992	21.8695	22.05	22.2248	22.1125	21.9719	22.4905	22.5995	22.1892			0.0732494	0.844794	-0.0301666	0.979307
O75396;A0A087X1A9	Vesicle-trafficking protein SEC22b	O75396	SEC22B	23.0567	23.2157	22.9402	23.2901	22.8056	23.2047	23.3673	23.3639	23.287			0.0598545	0.871255	-0.0292492	0.97993
P07814;V9GYZ6	Bifunctional glutamate/proline--tRNA ligase;Glutamate--tRNA ligase;Proline--tRNA ligase	P07814;V9GYZ6	EPRS	23.986	24.1345	24.3476	24.2766	24.1204	24.1566	24.792	24.7691	24.8573			0.0879676	0.816643	-0.0284907	0.980445
P48444;B0YIW6;Q6P1Q5;E9PK34	Coatomer subunit delta	P48444;B0YIW6	ARCN1	22.0607	22.0994	22.1726	21.6786	22.5334	22.2049	22.1412	22.0882	22.0866			0.0378818	0.91647	-0.0280412	0.980751
P62917;E9PKZ0;E9PKU4;G3V1A1;E9PP36	60S ribosomal protein L8	P62917;E9PKZ0;E9PKU4;G3V1A1;E9PP36	RPL8	24.4873	24.2983	25.8479	24.6695	24.7716	25.2763	25.2313	25.5053	25.4866			0.0177612	0.959928	-0.0279541	0.98081
Q7Z7K6	Centromere protein V	Q7Z7K6	CENPV	22.2247	22.5603	22.1948	22.3243	22.3535	22.3856	22.3154	22.5669	22.7745			0.0830517	0.82594	-0.0278155	0.980904
Q6P2E9;I3L2F4	Enhancer of mRNA-decapping protein 4	Q6P2E9	EDC4	22.221	22.3973	22.9644	22.7057	22.2232	22.7307	23.1381	22.9099	23.1321			0.0310153	0.931075	-0.0256411	0.982384
P61981	14-3-3 protein gamma;14-3-3 protein gamma, N-terminally processed	P61981	YWHAG	23.1759	22.9069	24.1706	23.6594	22.7497	23.9199	25.633	23.4116	23.114			0.0159774	0.963879	-0.0251999	0.982684
O75792	Ribonuclease H2 subunit A	O75792	RNASEH2A	20.8083	21.216	21.5921	21.3105	21.5652	20.8138	20.8378	21.5832	21.3535			0.0258237	0.942272	-0.0243581	0.983258
P35580;E7ERA5	Myosin-10	P35580	MYH10	23.1936	23.3805	23.6713	23.5192	23.2493	23.5493	23.7445	23.8918	24.0553			0.0491182	0.893062	-0.0241375	0.983408
P13010;H7C0H9;C9JZ81	X-ray repair cross-complementing protein 5	P13010	XRCC5	25.2608	25.3279	25.5731	25.4512	25.0896	25.6927	25.9064	25.8992	26.058			0.0408143	0.910302	-0.0239067	0.983566
P21964;E7EMS6;E7EUU8;F8WBW9;H7BZ45	Catechol O-methyltransferase	P21964;E7EMS6;E7EUU8;F8WBW9	COMT	20.5922	20.9642	20.7212	21.2362	20.0323	21.0717	21.537	20.8505	21.2229			0.0176763	0.960116	-0.0208766	0.985634
P52292;J3QLL0;J3KS65	Importin subunit alpha-1	P52292	KPNA2	24.7838	25.0449	25.1737	25.1481	24.9651	24.9485	25.2359	25.3321	25.4976			0.0518617	0.887438	-0.0198002	0.986369
Q08554	Desmocollin-1	Q08554	DSC1	25.0251	24.4124	24.4974	24.5775	25.1136	24.3023	24.0775	24.0537	23.8122			0.0212634	0.952218	-0.0194944	0.986578
P31146;H3BRY3;H3BTU6;H3BRJ0;H3BNA2;H3BU76;H3BSL1	Coronin-1A;Coronin	P31146;H3BRY3	CORO1A	26.2767	26.1355	26.7474	26.5236	26.3211	26.371	26.5156	26.6944	26.6442			0.0323421	0.928235	-0.0186698	0.987142
P53396;K7ESG8;K7EIE7	ATP-citrate synthase	P53396	ACLY	24.2509	24.6463	24.6301	24.5194	24.4114	24.652	25.1659	24.9244	25.0387			0.0429831	0.905768	-0.0184956	0.987262
Q15365;F8VTZ0;H3BSP4;C9K0A2;F8WC71;C9IZV9;C9J7A9;C9JSA6;C9J5V4;C9JTY5;C9JZY3;C9J0A4;F6TJN8;P57723	Poly(rC)-binding protein 1	Q15365	PCBP1	26.4284	26.149	26.4395	26.3034	26.4219	26.3459	26.3402	26.3586	26.2801			0.062194	0.866575	-0.0181141	0.987523
A0A024R4E5;Q00341;H0Y394;H7C0A4;C9JHS9;C9J739;C9JMQ6;C9JQ82;C9JBS3;C9JEJ8;A0A0U1RVI6;C9JHN6;C9JT62;C9JHS7;C9JK79;C9JHZ8;C9JES8;C9JZI8;C9J5E5;C9JIZ1;H7BZC3;H7C2D1	Vigilin	A0A024R4E5;Q00341;H0Y394	HDLBP	21.3352	20.9831	21.1986	21.2273	20.9815	21.3592	21.3083	20.807	21.0692			0.0383947	0.915388	-0.0170631	0.988242
Q07960;H0YE29;E9PNR6	Rho GTPase-activating protein 1	Q07960;H0YE29	ARHGAP1	19.3828	20.504	20.2266	19.8611	20.6582	19.6441	19.8689	19.8839	19.9807			0.0120416	0.972654	-0.016662	0.988517
M0R0F0;P46782;M0R0R2;M0QZN2	40S ribosomal protein S5;40S ribosomal protein S5, N-terminally processed	M0R0F0;P46782;M0R0R2;M0QZN2	RPS5	23.207	23.2172	24.492	23.7447	23.536	23.6829	24.0247	24.0918	24.0373			0.0120686	0.972594	-0.0157579	0.989137
P30520	Adenylosuccinate synthetase isozyme 2	P30520	ADSS	21.2334	21.2748	21.0288	21.4659	20.78	21.3335	21.5038	21.5734	21.9871			0.0210979	0.952581	-0.014136	0.99025
O14744;H0YJX6;G3V580;H0YJ77;G3V5L5;G3V2L6;G3V2X6;G3V507;G3V2F5;G3V5T6;C9JSX3	Protein arginine N-methyltransferase 5;Protein arginine N-methyltransferase 5, N-terminally processed	O14744;H0YJX6;G3V580	PRMT5	21.682	21.3489	21.9669	21.9903	21.5538	21.4952	21.5771	21.9033	22.1005			0.0194222	0.956264	-0.0138454	0.990449
P36542	ATP synthase subunit gamma, mitochondrial	P36542	ATP5C1	22.9458	23.4372	22.8011	22.9482	22.7775	23.4948	23.1575	22.5561	23.3691			0.0138656	0.968578	-0.0121371	0.991622
P23786	Carnitine O-palmitoyltransferase 2, mitochondrial	P23786	CPT2	21.501	20.1453	19.833	20.6179	20.5925	20.3048	20.0646	19.798	21.9484			0.00753678	0.982796	-0.0119686	0.991738
P62136;H0Y3Y6;E7ETD8;E9PMD7;P62140;F5H1L6;F5H037	Serine/threonine-protein phosphatase PP1-alpha catalytic subunit;Serine/threonine-protein phosphatase;Serine/threonine-protein phosphatase PP1-beta catalytic subunit	P62136;H0Y3Y6;E7ETD8;E9PMD7;P62140	PPP1CA;PPP1CB	21.6763	22.7299	22.8144	22.3778	22.2075	22.6666	22.7537	22.7458	22.5128			0.00878588	0.979973	-0.0104109	0.99281
Q01082;A0A087WUZ3;F8W6C1;A4QPE4;M0QZQ3;C9JY79;P11277;Q9H254	Spectrin beta chain, non-erythrocytic 1	Q01082;A0A087WUZ3	SPTBN1	25.3639	25.2277	25.4746	25.5325	25.1291	25.4333	25.931	25.9182	26.0139			0.0227122	0.949047	-0.00957489	0.993385
P22102;F8WD69;C9JZG2;C9JKQ7;C9JBJ1;C9JTV6;A0A140TA71	Trifunctional purine biosynthetic protein adenosine-3;Phosphoribosylamine--glycine ligase;Phosphoribosylformylglycinamidine cyclo-ligase;Phosphoribosylglycinamide formyltransferase	P22102	GART	23.726	23.7225	23.8315	24.0997	23.3884	23.8205	24.1999	24.1454	24.4343			0.0149897	0.966074	-0.00950305	0.993435
P62829;C9JD32;J3KT29;B9ZVP7;J3KTJ3;J3QQT9	60S ribosomal protein L23	P62829;C9JD32;J3KT29;B9ZVP7	RPL23	24.7656	24.6224	24.7026	24.8598	24.2985	24.9601	25.2171	24.8666	25.1152			0.0146885	0.966744	-0.00931549	0.993564
Q16778;P33778;P23527;P06899;Q96A08;Q6DRA6;Q6DN03	Histone H2B type 2-E;Histone H2B type 1-B;Histone H2B type 1-O;Histone H2B type 1-J	Q16778;P33778;P23527;P06899	HIST2H2BE;HIST1H2BB;HIST1H2BO;HIST1H2BJ	27.3038	27.0951	27.0916	27.2643	26.8634	27.389	26.8514	26.9138	26.8964			0.0166258	0.962441	-0.00868734	0.993996
P09012;M0QZG7;M0R268;M0QXK2;M0R221;M0R2B8;M0R0G9;P08579	U1 small nuclear ribonucleoprotein A	P09012;M0QZG7;M0R268;M0QXK2;M0R221;M0R2B8;M0R0G9	SNRPA	21.9041	22.2351	22.7099	22.642	21.9937	22.2387	22.87	22.9265	22.9518			0.00922639	0.97898	-0.00842857	0.994175
P49736;H0Y8E6	DNA replication licensing factor MCM2	P49736;H0Y8E6	MCM2	24.3877	24.2874	24.4007	24.3038	24.3175	24.4762	24.5517	24.7153	24.7601			0.0371572	0.918	-0.00722122	0.995007
P17096	High mobility group protein HMG-I/HMG-Y	P17096	HMGA1	23.5008	23.3987	23.1779	23.3461	23.1722	23.5797	23.6893	23.5299	23.965			0.0149228	0.966223	-0.0068353	0.995273
O15173	Membrane-associated progesterone receptor component 2	O15173	PGRMC2	20.4544	21.4628	21.5098	21.6497	21.1829	20.6128	21.7004	21.7296	21.7564			0.00437298	0.989981	-0.00609843	0.995782
P62191;G3V4X1	26S protease regulatory subunit 4	P62191	PSMC1	21.9205	21.5896	22.4133	22.0487	22.2355	21.6563	22.7368	22.3142	22.6028			0.00640025	0.985371	-0.00573413	0.996033
Q99536;K7ERT7;K7ESA3;K7ENX2;K7EM19;K7EJM4;K7ER81	Synaptic vesicle membrane protein VAT-1 homolog	Q99536;K7ERT7	VAT1	24.7143	24.7057	24.8373	24.8987	24.5821	24.7897	25.054	25.1167	25.2446			0.0143383	0.967524	-0.00442441	0.996938
Q00796;H0YLA4;H0YKB3	Sorbitol dehydrogenase	Q00796;H0YLA4;H0YKB3	SORD	22.219	22.0182	22.2342	21.9459	22.0592	22.4742	22.1262	22.1747	22.4347			0.00491013	0.988758	-0.00262324	0.998183
Q96QA5;J3KRG2	Gasdermin-A	Q96QA5;J3KRG2	GSDMA	24.8662	24.5448	24.1859	24.5854	24.7801	24.2385	23.2845	23.64	23.876			0.00310521	0.992875	-0.00239754	0.99834
P05089	Arginase-1	P05089	ARG1	25.1118	24.9715	24.3277	25.426	24.7323	24.2581	24.2781	24.2007	24.3389			0.00140762	0.996764	-0.00179609	0.998756
P25789;H0YMZ1;H0YN18;H0YL69;H0YMI6;H0YMA1;H0YKT8;H0YKS0;H0YLS6;H0YLC2	Proteasome subunit alpha type-4;Proteasome subunit alpha type;Proteasome subunit beta type	P25789;H0YMZ1;H0YN18;H0YL69;H0YMI6;H0YMA1;H0YKT8	PSMA4	22.4016	22.3671	22.7163	22.6974	22.2703	22.5204	22.6518	22.7482	22.4081			0.00203924	0.995315	-0.00103951	0.99928
P05388;F8VWS0;F8VU65;F8VPE8;G3V210;F8VW21;F8VQY6;F8VRK7;F8VZS0;Q8NHW5;F8VS58;F8VWV4;F8W1K8	60S acidic ribosomal protein P0;60S acidic ribosomal protein P0-like	P05388;F8VWS0;F8VU65;F8VPE8;G3V210;F8VW21;F8VQY6;F8VRK7;F8VZS0;Q8NHW5	RPLP0;RPLP0P6	25.04	25.4933	25.988	25.7453	25.1744	25.6046	26.0019	25.9931	26.2132			0.00103805	0.997613	-0.0010287	0.999287
C9JRZ6;Q9NX63;F8WAR4;F8WD73	MICOS complex subunit MIC19	C9JRZ6;Q9NX63;F8WAR4	CHCHD3	22.1338	21.9517	21.7981	21.8168	21.8276	22.2407	22.4628	22.5548	22.3787			0.000923366	0.997876	-0.000481288	0.999666
A3KN83;K7ES28;Q9Y2G9	Protein strawberry notch homolog 1;Protein strawberry notch homolog 2	A3KN83;K7ES28;Q9Y2G9	SBNO1;SBNO2	19.4081	19.9966	19.7488	21.0376	22.1877	22.4183	18.6013	18.9071	18.9856			-4.34294e-08	1	0	1
H0YBA1;A6NNN6;E7ETA6;Q15154	Pericentriolar material 1 protein	H0YBA1;A6NNN6;E7ETA6;Q15154	PCM1	23.0182	21.5957	20.8765	19.9053	22.5528	21.9514	20.0048	20.7163	20.5821			-4.34294e-08	1	0	1
E9PC15;Q53H12;A0A0G2JLG5;E9PG39;A0A0G2JLD0	Acylglycerol kinase, mitochondrial	E9PC15;Q53H12;A0A0G2JLG5;E9PG39	AGK	22.0292	18.6683	19.6765	22.1401	22.0787	21.6501	19.6802	19.74	19.0661			-4.34294e-08	1	0	1
F2Z2S2;O94915	Protein furry homolog-like	F2Z2S2;O94915	FRYL	19.4772	19.976	20.165	21.4556	20.0503	21.1475	19.1727	18.9419	19.267			-4.34294e-08	1	0	1
G5E9C7;P36507;M0R1B6;Q02750	Dual specificity mitogen-activated protein kinase kinase 2;Dual specificity mitogen-activated protein kinase kinase 1	G5E9C7;P36507;M0R1B6;Q02750	MAP2K2;MAP2K1	19.9594	21.5247	18.7601	19.6907	22.1671	20.1003	20.4867	19.2233	19.1412			-4.34294e-08	1	0	1
J3KQ48;Q9Y3E5	Peptidyl-tRNA hydrolase 2, mitochondrial	J3KQ48;Q9Y3E5	PTRH2	20.5753	20.08	21.6216	22.5062	19.7344	21.3488	19.2714	20.4086	20.2238			-4.34294e-08	1	0	1
O00487	26S proteasome non-ATPase regulatory subunit 14	O00487	PSMD14	20.711	20.7894	20.1973	20.5336	20.3122	21.7221	22.9553	23.1252	23.192			-4.34294e-08	1	0	1
O75475	PC4 and SFRS1-interacting protein	O75475	PSIP1	23.0668	21.1188	19.2763	19.7965	20.8583	20.0927	20.9813	21.4908	20.9925			-4.34294e-08	1	0	1
O95235;D6R9E4;D6RBN1	Kinesin-like protein KIF20A	O95235	KIF20A	20.2317	19.6196	21.7888	21.4268	22.3934	20.9148	20.6456	20.2412	21.5069			-4.34294e-08	1	0	1
P36915;A2AB27;A0A140T8Y2	Guanine nucleotide-binding protein-like 1	P36915;A2AB27;A0A140T8Y2	GNL1	20.756	19.7968	19.4559	22.9207	22.3175	21.434	21.4463	19.4451	20.0215			-4.34294e-08	1	0	1
P61964	WD repeat-containing protein 5	P61964	WDR5	20.1589	19.6923	20.0315	20.5611	21.4984	20.3462	20.8842	20.5908	19.4425			-4.34294e-08	1	0	1
Q08752;H0Y8J0	Peptidyl-prolyl cis-trans isomerase D	Q08752;H0Y8J0	PPID	18.6275	20.2871	21.5051	21.1504	22.0068	21.0632	19.6161	21.6922	19.6569			-4.34294e-08	1	0	1
Q14684	Ribosomal RNA processing protein 1 homolog B	Q14684	RRP1B	24.3088	22.2231	20.6361	18.7123	20.6026	21.5153	22.7446	21.5754	21.2106			-4.34294e-08	1	0	1
Q5T4S7;X6R960;A0A0A0MSW0	E3 ubiquitin-protein ligase UBR4	Q5T4S7	UBR4	20.005	21.0033	18.8061	19.286	20.237	19.9827	20.3945	20.005	21.2131			-4.34294e-08	1	0	1
Q5UIP0;H7C2B5;H7BZN3	Telomere-associated protein RIF1	Q5UIP0	RIF1	21.0668	18.8211	21.5107	21.0506	21.1444	20.3552	19.3963	19.5447	18.7527			-4.34294e-08	1	0	1
Q7Z3B4	Nucleoporin p54	Q7Z3B4	NUP54	18.7052	19.9646	19.3365	20.415	22.2183	20.5681	20.7127	20.5555	20.5339			-4.34294e-08	1	0	1
Q8WVM8	Sec1 family domain-containing protein 1	Q8WVM8	SCFD1	19.3848	20.8565	20.6437	20.3545	21.9243	23.3526	19.7597	20.0591	20.016			-4.34294e-08	1	0	1
Q8WY22	BRI3-binding protein	Q8WY22	BRI3BP	19.4329	19.5702	19.5647	22.0117	22.1053	22.6407	20.4682	20.595	20.7258			-4.34294e-08	1	0	1
Q93009;H3BND8;F5H2X1;H3BUV0;H3BTM1;H3BRA2;H3BQD1	Ubiquitin carboxyl-terminal hydrolase 7;Ubiquitin carboxyl-terminal hydrolase	Q93009;H3BND8;F5H2X1	USP7	19.3285	20.5428	20.5764	21.9495	21.0252	19.8087	21.241	20.3859	20.2725			-4.34294e-08	1	0	1
Q99805	Transmembrane 9 superfamily member 2	Q99805	TM9SF2	19.1067	18.517	20.309	22.0672	21.4294	19.4397	20.1279	21.3895	20.0755			-4.34294e-08	1	0	1
E9PSH8;P07766	T-cell surface glycoprotein CD3 epsilon chain	E9PSH8;P07766	CD3E	23.1717	22.9129	23.1084	22.907	23.0207	23.2587	23.1619	23.3934	23.3324			0.00566637	0.987037	0.0022405	1.00155
O43175;Q5SZU1	D-3-phosphoglycerate dehydrogenase	O43175;Q5SZU1	PHGDH	25.1648	25.3113	24.7781	25.1197	24.9488	25.1765	25.6518	25.673	25.5003			0.00580697	0.986718	0.00306638	1.00213
Q9Y230;M0R0Y3;X6R2L4;M0R0Z0;M0QXI6;M0QXZ7	RuvB-like 2	Q9Y230;M0R0Y3	RUVBL2	24.3182	24.5104	24.4197	24.5503	24.1716	24.517	24.7379	24.5975	24.7232			0.00778128	0.982243	0.00315412	1.00219
P25205;J3KQ69;Q7Z6P5	DNA replication licensing factor MCM3	P25205;J3KQ69	MCM3	25.2159	25.0639	24.991	25.0701	24.9066	25.284	25.6345	25.5685	25.6172			0.00869911	0.980169	0.00337982	1.00235
P02786;G3V0E5;H7C3V5;F8WBE5	Transferrin receptor protein 1;Transferrin receptor protein 1, serum form	P02786;G3V0E5	TFRC	23.9746	23.8129	24.3854	24.1042	23.8561	24.2	24.5316	24.4736	24.5694			0.00691043	0.984214	0.00418536	1.00291
Q6P2Q9;I3L0J9;I3L3Z8	Pre-mRNA-processing-splicing factor 8	Q6P2Q9	PRPF8	23.5343	23.127	23.037	22.9555	23.4045	23.3255	23.4466	23.4054	23.4752			0.00676947	0.984534	0.00425466	1.00295
Q8WUM4;C9IZF9;F8WEQ7;F8WBR8;F8WDK9	Programmed cell death 6-interacting protein	Q8WUM4	PDCD6IP	21.6201	21.6289	22.2437	22.0758	21.5581	21.842	21.919	21.9692	22.2547			0.00725937	0.983424	0.00563622	1.00391
RS27A_HUMAN;P62979;J3QS39;J3QTR3;F5H6Q2;F5GYU3;F5H2Z3;F5H265;B4DV12;F5H388;F5H747;F5GXK7;J3QKN0;Q5PY61;Q96C32;P62987;P0CG47;P0CG48;M0R1V7;M0R1M6;M0R2S1;J3QSA3;F5GZ39	Ubiquitin-40S ribosomal protein S27a;Ubiquitin;40S ribosomal protein S27a;Ubiquitin-60S ribosomal protein L40;Ubiquitin;60S ribosomal protein L40;Polyubiquitin-B;Ubiquitin;Polyubiquitin-C;Ubiquitin	RS27A_HUMAN;P62979;J3QS39;J3QTR3;F5H6Q2;F5GYU3;F5H2Z3;F5H265;B4DV12;F5H388;F5H747;F5GXK7;J3QKN0;Q5PY61;Q96C32;P62987;P0CG47;P0CG48;M0R1V7;M0R1M6;M0R2S1	RPS27A;UBB;UBC;UBA52	28.4393	28.4628	27.8588	27.8943	28.3046	28.5446	28.8331	28.6423	28.7462			0.00694978	0.984125	0.00579961	1.00403
P22059	Oxysterol-binding protein 1	P22059	OSBP	20.4346	20.7143	20.7689	20.3614	21.4691	20.0685	20.3275	20.7122	20.8819			0.0046796	0.989283	0.006272	1.00436
Q15393;J3QRB2;J3QL37;I3L4G7	Splicing factor 3B subunit 3	Q15393	SF3B3	24.8708	24.4638	24.9292	24.7471	24.6234	24.8738	25.3157	25.323	25.3644			0.013206	0.97005	0.00652122	1.00453
O43396;K7ER96;K7EKG2;K7EPB7;K7EML9	Thioredoxin-like protein 1	O43396;K7ER96	TXNL1	22.243	22.1128	22.7548	22.299	22.0258	22.7647	22.2193	21.8035	22.1514			0.00791083	0.98195	0.00701396	1.00487
B1AHD1;P55769	NHP2-like protein 1;NHP2-like protein 1, N-terminally processed	B1AHD1;P55769	NHP2L1	23.3844	22.8107	23.4125	23.3667	23.0501	23.1675	23.7764	24.0603	23.5852			0.011913	0.972942	0.00782204	1.00544
Q92598;A0A0A0MSM0;R4GN69;Q5TBM3	Heat shock protein 105 kDa	Q92598;A0A0A0MSM0	HSPH1	23.9691	24.1011	24.2138	24.3333	23.9276	23.999	24.4743	24.5458	24.7181			0.0186132	0.958047	0.00804138	1.00559
P23396;E9PL09;E9PPU1;F2Z2S8;H0YEU2;H0YCJ7;E9PQ96;E9PJH4;H0YF32;E9PK82;E9PSF4;E9PQX2;H0YES8;E9PJN9	40S ribosomal protein S3	P23396;E9PL09;E9PPU1;F2Z2S8;H0YEU2;H0YCJ7	RPS3	27.1785	27.1856	27.13	27.3669	26.9775	27.124	27.4372	27.5017	27.5707			0.0249277	0.944218	0.00855637	1.00595
P05023;M0R116;A0A0A0MT26;P13637;B1AKY9;P50993;H0Y7C1;Q13733;Q5TC01;E9PRA5;Q5TC02;M0QXF2;P20648;P54707	Sodium/potassium-transporting ATPase subunit alpha-1;Sodium/potassium-transporting ATPase subunit alpha-3	P05023;M0R116;A0A0A0MT26;P13637	ATP1A1;ATP1A3	25.2762	25.0132	24.4425	25.0135	24.7689	24.9216	25.2042	25.342	25.5664			0.0120084	0.972728	0.00931803	1.00648
P09874;Q5VX84;Q5VX85	Poly [ADP-ribose] polymerase 1	P09874	PARP1	25.0163	25.3279	25.025	25.1325	24.9518	25.255	25.4638	25.4974	25.6844			0.0247925	0.944512	0.010006	1.00696
P20340;F5H3K7;F5GX61;Q9NRW1;C9JU14;J3KR73;C9JB90;C9J0I2;Q14964	Ras-related protein Rab-6A;Ras-related protein Rab-6B	P20340;F5H3K7;F5GX61;Q9NRW1	RAB6A;RAB6B	24.0097	24.1736	23.7626	24.1832	24.0547	23.6748	24.4555	24.4994	24.3892			0.0189658	0.95727	0.0110499	1.00769
P55072;C9JUP7;C9IZA5	Transitional endoplasmic reticulum ATPase	P55072	VCP	25.6103	25.5812	25.9306	25.8797	25.4117	25.7973	26.3894	26.3018	26.4079			0.0203161	0.954298	0.0111338	1.00775
Q15029;K7EP67;K7EJ74	116 kDa U5 small nuclear ribonucleoprotein component	Q15029	EFTUD2	24.2997	24.2081	24.6419	24.4646	24.2461	24.4008	24.5783	24.6256	24.779			0.0292121	0.934949	0.0127773	1.0089
Q15008;H7C531;C9J7B7;C9J0E9	26S proteasome non-ATPase regulatory subunit 6	Q15008	PSMD6	21.3392	20.8337	21.9357	22.4407	19.955	21.673	19.5075	22.3518	21.8635			0.00546185	0.987502	0.0133464	1.00929
C9JIF9;P13798;H7C393;H7C1U0;C9JLK2;F8WEH5	Acylamino-acid-releasing enzyme	C9JIF9;P13798;H7C393;H7C1U0	APEH	22.2956	21.5317	21.9925	21.766	22.0576	21.9536	21.512	21.6427	21.4063			0.0198206	0.955387	0.0141621	1.00986
P10515;H0YDD4;E9PEJ4	Dihydrolipoyllysine-residue acetyltransferase component of pyruvate dehydrogenase complex, mitochondrial;Acetyltransferase component of pyruvate dehydrogenase complex	P10515;H0YDD4;E9PEJ4	DLAT	23.0556	22.969	23.1491	23.1284	22.8835	23.1157	23.275	23.2942	23.5007			0.0556777	0.879675	0.0153414	1.01069
X1WI28;P27635;F8W7C6;A0A087WV22;H7C123;B8A6G2;H7C2C5;A6QRI9;Q96L21	60S ribosomal protein L10	X1WI28;P27635;F8W7C6;A0A087WV22	RPL10	22.9889	22.8971	23.4694	23.1826	22.8199	23.3055	23.798	23.936	24.4739			0.0229356	0.948559	0.0157668	1.01099
P53621	Coatomer subunit alpha;Xenin;Proxenin	P53621	COPA	23.8743	24.0612	23.5228	23.6729	23.6091	24.1275	24.3265	24.3603	24.5188			0.0238951	0.946466	0.0162239	1.01131
P52306;D6RBC6;D6RB97;D6RC12;D6RHZ7;D6RHH8;D6REZ0	Rap1 GTPase-GDP dissociation stimulator 1	P52306;D6RBC6;D6RB97	RAP1GDS1	21.0583	21.1556	20.6538	20.6516	21.5976	20.5675	21.4068	20.7532	21.2377			0.0154769	0.964991	0.0170097	1.01186
A0A0U1RRM4;P26599;A6NLN1;A0A0D9SF20;K7EK45;K7EKJ7;A0A087WUW5;A0A087WU68;K7ELW5;K7ES59;O95758;X6R242	Polypyrimidine tract-binding protein 1	A0A0U1RRM4;P26599;A6NLN1	PTBP1	24.5324	24.7733	25.0187	24.8571	24.843	24.571	25.078	25.282	25.3245			0.0356468	0.921198	0.017739	1.01237
Q9Y490;Q9Y4G6;H0YMT1	Talin-1	Q9Y490	TLN1	25.3809	25.2782	25.5558	25.4096	25.2524	25.498	25.8575	25.9528	26.1644			0.058444	0.87409	0.0182832	1.01275
Q13045;K7EP37;K7EP27;J3KS54	Protein flightless-1 homolog	Q13045	FLII	21.3025	21.019	20.8427	20.9439	20.9931	21.1722	21.1101	21.2011	21.4586			0.0413606	0.909158	0.0183245	1.01278
C9J0E4;P01040	Cystatin-A;Cystatin-A, N-terminally processed	C9J0E4;P01040	CSTA	20.0951	21.908	21.4512	21.7621	19.8118	21.8229	20.807	21.6215	19.7056			0.00735359	0.98321	0.0191625	1.01337
Q8N163;H0YB24;G3V119;E5RGU7;E5RFJ3;E5RHJ4;H0YC69;H0YC58;E5RHH8;A0A087X2B6	Cell cycle and apoptosis regulator protein 2	Q8N163;H0YB24	CCAR2	23.7388	23.9814	23.8298	23.843	23.7779	23.8698	23.8344	24.1852	24.1384			0.0931497	0.806957	0.0197926	1.01381
C9JXB8;C9JNW5;P83731	60S ribosomal protein L24	C9JXB8;C9JNW5;P83731	RPL24	24.3526	23.8551	23.8402	23.8242	24.105	24.0561	24.829	24.5333	24.8065			0.0372863	0.917727	0.0208219	1.01454
Q92556;C9JIW2;C9IZR8;C9J5X3;C9JB20;Q5JW01;H0YCM7;Q5JVZ5;Q96JJ3;H7C0N5;H7C0S6;H7C3P3	Engulfment and cell motility protein 1	Q92556	ELMO1	21.3501	21.33	22.4793	21.7138	21.3975	21.9802	22.5915	22.4162	22.5895			0.0180889	0.959204	0.0226116	1.0158
F5GWX5;A0A0C4DGG9;Q14839;Q8TDI0;K7EMY3;F2Z2R5	Chromodomain-helicase-DNA-binding protein 4	F5GWX5;A0A0C4DGG9;Q14839	CHD4	22.7825	22.8432	22.3115	22.5723	22.4011	22.8939	23.1651	23.3609	23.2967			0.0355825	0.921335	0.0232938	1.01628
Q9UHB9	Signal recognition particle subunit SRP68	Q9UHB9	SRP68	22.7392	21.866	22.4074	22.4141	21.9865	22.5405	22.9259	22.8814	22.885			0.0262011	0.941454	0.023819	1.01665
P11717;S4R328	Cation-independent mannose-6-phosphate receptor	P11717	IGF2R	22.7675	22.707	22.9282	22.6998	22.801	22.8296	23.2921	23.337	23.4687			0.114162	0.768843	0.0241731	1.0169
P17252;J3KRN5;P05771;H3BV73;P05129;M0R0I9	Protein kinase C alpha type	P17252	PRKCA	22.7482	22.9984	23.4816	23.037	23.0577	23.0544	23.389	23.3512	23.6345			0.0417822	0.908276	0.0264174	1.01848
Q9Y2X3;H7BZ72	Nucleolar protein 58	Q9Y2X3	NOP58	24.9799	24.2207	24.2007	24.4828	24.4401	24.3986	24.3871	24.3658	24.2645			0.0349347	0.92271	0.0266062	1.01861
P14618;H3BTN5;B4DNK4;H3BQ34;H3BR70;H3BUW1;H3BTJ2;H3BT25;H3BU13;H3BN34;H3BQZ3;P30613	Pyruvate kinase PKM;Pyruvate kinase	P14618;H3BTN5;B4DNK4;H3BQ34	PKM	27.9175	28.1736	28.5431	28.3243	28.074	28.1558	28.5497	28.5872	28.8273			0.0466949	0.898059	0.0267372	1.01871
P62906	60S ribosomal protein L10a	P62906	RPL10A	24.3003	23.5531	24.6234	24.0905	24.1374	24.1653	24.8191	24.4131	24.5593			0.0295539	0.934213	0.0279134	1.01954
O43707;H7C144;F5GXS2;A0A087WSZ2;P35609;Q08043;G3V2X9;K7EJH8;G3V2E8;G3V5M4;F6THM6	Alpha-actinin-4	O43707;H7C144;F5GXS2	ACTN4	24.1411	24.3188	23.966	24.2545	23.8418	24.239	24.6394	24.6639	24.5803			0.0619374	0.867087	0.0301755	1.02114
C9JG87;Q9NYK5	39S ribosomal protein L39, mitochondrial	C9JG87;Q9NYK5	MRPL39	20.3753	18.8295	18.745	20.5328	18.675	18.6481	20.5204	19.6748	18.2568			0.0126161	0.971368	0.0312557	1.0219
O95573	Long-chain-fatty-acid--CoA ligase 3	O95573	ACSL3	21.5795	21.6135	22.2997	21.9134	21.6893	21.7915	22.3406	21.5952	22.5017			0.0461073	0.899275	0.0328089	1.023
P68371;M0R2D3;M0R042;M0QYM7;M0R2T4	Tubulin beta-4B chain	P68371	TUBB4B	27.5213	27.7197	28.1004	27.8758	27.5422	27.8244	28.2045	28.1215	28.1925			0.0572397	0.876517	0.0329596	1.02311
P61513;G5E9R3;C9J4Z3;Q6P4E4;E9PEL3;M0R0A1;M0R2L6;A6NKH3	60S ribosomal protein L37a	P61513;G5E9R3;C9J4Z3;Q6P4E4;E9PEL3;M0R0A1;M0R2L6	RPL37A	23.5978	23.6673	22.9811	23.3369	23.3788	23.4266	23.9044	24.2211	23.9947			0.0543596	0.882349	0.0346286	1.02429
Q5T6H7;Q9NQW7	Xaa-Pro aminopeptidase 1	Q5T6H7;Q9NQW7	XPNPEP1	22.0886	21.4644	22.0347	22.0605	21.5659	21.8572	22.0947	22.0034	22.0491			0.0483142	0.894717	0.0346642	1.02432
P07355;H0YMD0;H0YMU9;H0YN42;H0YKS4;A6NMY6;H0YMM1;H0YNP5;H0YM50;H0YKZ7;H0YLV6;H0YMT9;H0YKX9;H0YKV8;H0YKL9;H0YN28;H0YL33;H0YMW4;H0YMD9;H0YNA0;H0YNB8;H0YN52;H0YKN4;H0YLE2	Annexin A2;Annexin;Putative annexin A2-like protein	P07355;H0YMD0;H0YMU9;H0YN42;H0YKS4;A6NMY6;H0YMM1;H0YNP5;H0YM50	ANXA2;ANXA2P2	24.7396	24.8773	23.9024	24.7836	24.4983	24.1329	24.3019	24.4684	23.8141			0.03285	0.92715	0.0348549	1.02445
O14776;G3V220	Transcription elongation regulator 1	O14776;G3V220	TCERG1	20.6081	20.7155	20.8381	21.1938	19.2213	21.642	20.5239	20.4886	20.3451			0.015474	0.964997	0.0348562	1.02445
Q99832;F8WAM2;F8WBP8;A0A0D9SG95	T-complex protein 1 subunit eta	Q99832	CCT7	25.8071	25.9333	26.1219	26.0867	25.4973	26.1736	26.4973	26.389	26.6626			0.0518587	0.887445	0.034874	1.02447
P48449;A0A0G2JQD0;C9J315;A0A0G2JS81	Lanosterol synthase	P48449;A0A0G2JQD0	LSS	22.1508	22.1683	22.7856	22.2591	22.2315	22.5081	22.9145	23.1861	22.9251			0.05372	0.883649	0.0353222	1.02479
P46779;H0YKD8;H0YMF4;H0YLP6	60S ribosomal protein L28	P46779;H0YKD8;H0YMF4;H0YLP6	RPL28	24.8467	24.4843	24.1828	24.157	24.5475	24.7026	25.1171	24.8892	25.0891			0.0485422	0.894248	0.0355899	1.02498
P17987;E7EQR6;E7ERF2;F5H282;F5GZ03;F5H136;F5GZI8;F5H676;F5H7Y1;F5H726;F5GYL4	T-complex protein 1 subunit alpha	P17987;E7EQR6;E7ERF2;F5H282	TCP1	26.2738	26.4227	26.5756	26.5073	26.1806	26.4647	26.7244	26.8495	26.9119			0.106747	0.782084	0.0398051	1.02797
P11021	78 kDa glucose-regulated protein	P11021	HSPA5	26.9122	27.142	27.6466	27.4542	26.918	27.2084	27.4398	27.4877	27.5502			0.0516793	0.887811	0.0400645	1.02816
O14737;K7EQA1;K7ESJ4;Q3HM38;X6R2P6	Programmed cell death protein 5	O14737;K7EQA1;K7ESJ4	PDCD5	20.5747	20.2447	21.1607	20.5306	20.5433	20.783	20.7826	20.7835	20.118			0.0503467	0.89054	0.0410709	1.02888
P30041	Peroxiredoxin-6	P30041	PRDX6	22.9649	23.0967	22.6221	23.3899	22.7017	22.463	22.7927	22.6189	22.3571			0.0472462	0.89692	0.0430234	1.03027
Q8WVV4	Protein POF1B	Q8WVV4	POF1B	20.7349	22.2526	20.5661	20.644	20.9847	21.7941	20.2817	20.8345	19.7837			0.022895	0.948648	0.0435562	1.03065
Q9Y295;H0YI06	Developmentally-regulated GTP-binding protein 1	Q9Y295	DRG1	22.5956	21.9299	22.8035	22.4503	22.3484	22.3984	23.1442	23.0882	23.0463			0.0572849	0.876426	0.0439313	1.03092
O95433;G3V438;H0YJU2;G3V3W9;H0YJG7;H0YJ63	Activator of 90 kDa heat shock protein ATPase homolog 1	O95433;G3V438;H0YJU2	AHSA1	21.7447	22.1546	22.6227	21.2962	22.3771	22.7165	22.2302	22.4741	22.5333			0.0297909	0.933704	0.0440655	1.03102
P42167;G5E972;H0YJH7	Lamina-associated polypeptide 2, isoforms beta/gamma;Thymopoietin;Thymopentin	P42167;G5E972	TMPO	24.9831	24.5465	24.9844	24.8814	24.6434	24.8556	25.208	25.0219	25.1144			0.0971031	0.799644	0.0445048	1.03133
P54578;A6NJA2;J3QQT6;J3KS55;H0YA47	Ubiquitin carboxyl-terminal hydrolase 14;Ubiquitin carboxyl-terminal hydrolase	P54578;A6NJA2	USP14	23.8238	23.7655	24.0934	23.7797	23.6343	24.1342	24.1538	24.5351	24.4322			0.0886954	0.815276	0.044796	1.03154
Q9NR31;X1WI22;D6RAA2;H0Y5E8;Q5SQT8;D6RDB2;D6RD69;Q9Y6B6	GTP-binding protein SAR1a;GTP-binding protein SAR1b	Q9NR31;X1WI22;D6RAA2;H0Y5E8;Q5SQT8;D6RDB2;D6RD69;Q9Y6B6	SAR1A;SAR1B	21.433	21.4607	20.8245	21.4891	20.7589	21.3318	21.6112	21.8911	21.8349			0.0522491	0.886647	0.0461438	1.0325
J9JID7;Q03252	Lamin-B2	J9JID7;Q03252	LMNB2	20.6406	20.8402	21.0773	20.4542	21.3399	20.6254	20.6059	21.3417	21.336			0.0531418	0.884827	0.0461686	1.03252
Q9NVV4;Q5T852	Poly(A) RNA polymerase, mitochondrial	Q9NVV4;Q5T852	MTPAP	20.8176	21.1503	20.3669	21.3185	21.7186	19.1581	18.7581	19.4915	20.6024			0.0187063	0.957842	0.0465183	1.03277
P61254;J3KTJ8;J3QRI7;J3QQQ9;J3QQV1;E5RIT6;J3QRC4;Q9UNX3;J3KSS0;E5RHH1;J3KS10	60S ribosomal protein L26;60S ribosomal protein L26-like 1	P61254;J3KTJ8;J3QRI7;J3QQQ9;J3QQV1;E5RIT6;J3QRC4;Q9UNX3	RPL26;RPL26L1	24.1555	23.7986	24.5816	24.0031	23.9189	24.4733	24.4078	24.4147	24.5152			0.056849	0.877306	0.0468184	1.03298
P14635;E9PC90;H0YA62;D6RHI0	G2/mitotic-specific cyclin-B1	P14635;E9PC90	CCNB1	21.0708	21.683	21.2477	21.2824	20.7987	21.7786	21.145	21.7859	21.7115			0.0481323	0.895092	0.0472336	1.03328
J3KTF8;J3QQX2;P52565;J3KRE2;J3KS60;J3KRY1	Rho GDP-dissociation inhibitor 1	J3KTF8;J3QQX2;P52565;J3KRE2	ARHGDIA	23.4167	23.4486	24.3402	24.0108	23.652	23.3986	23.6718	23.2754	23.5803			0.0468926	0.897651	0.0480747	1.03388
Q9P258	Protein RCC2	Q9P258	RCC2	24.3416	24.2486	24.3321	24.4298	24.3013	24.0393	24.3124	24.1694	24.2787			0.160078	0.691707	0.050595	1.03569
P61353;K7EQQ9;K7ELC7;K7ERY7	60S ribosomal protein L27	P61353;K7EQQ9;K7ELC7	RPL27	24.6535	24.5879	24.7985	24.6412	24.5949	24.6489	25.3815	24.8648	25.2739			0.329641	0.468122	0.0516211	1.03643
Q2NL82;I3L4E8;I3L1Q5	Pre-rRNA-processing protein TSR1 homolog	Q2NL82	TSR1	21.3109	20.614	20.3224	20.4965	21.8128	19.7823	20.9676	20.9212	20.9528			0.0262614	0.941323	0.0519428	1.03666
P62753;A2A3R5;A2A3R7	40S ribosomal protein S6	P62753;A2A3R5	RPS6	25.6761	25.9736	25.6594	25.8954	25.5201	25.7355	26.0413	26.1066	26.1237			0.129851	0.741564	0.0527166	1.03722
Q16555;E5RFU4;E9PD68;Q14194	Dihydropyrimidinase-related protein 2	Q16555	DPYSL2	23.4266	23.5007	23.4535	23.4615	23.4375	23.3195	23.5564	23.5774	23.5816			0.480444	0.330793	0.0541204	1.03823
P61221;D6R9I9;D6RGF4;H0Y990	ATP-binding cassette sub-family E member 1	P61221;D6R9I9	ABCE1	23.6059	24.0044	24.2756	24.0775	23.6332	24.0108	24.0589	23.9749	24.3849			0.0811045	0.829651	0.0547994	1.03871
P12956;B1AHC9	X-ray repair cross-complementing protein 6	P12956;B1AHC9	XRCC6	25.634	25.978	25.8128	26.0601	25.4474	25.7491	26.4713	26.4355	26.5404			0.0991277	0.795925	0.0560729	1.03963
Q9GZT3;A0A087WUN7;H0YJ40;G3V4X6;G3V2S9;H0YJW7;H0YJI1	SRA stem-loop-interacting RNA-binding protein, mitochondrial	Q9GZT3;A0A087WUN7;H0YJ40;G3V4X6;G3V2S9;H0YJW7	SLIRP	22.5887	22.6807	23.0879	22.3318	23.211	22.6428	22.0643	21.9619	22.0009			0.0666153	0.857797	0.0572389	1.04047
P62851	40S ribosomal protein S25	P62851	RPS25	24.5131	24.0041	23.655	24.5367	23.2866	24.1756	24.6939	24.623	24.9247			0.0441064	0.903428	0.0577895	1.04087
P27797;K7EJB9;K7EL50	Calreticulin	P27797;K7EJB9	CALR	21.4308	22.2253	23.6625	22.3595	23.4355	21.348	22.9628	22.7189	22.6493			0.0219981	0.950609	0.0585779	1.04144
P28066	Proteasome subunit alpha type-5	P28066	PSMA5	22.1514	22.1327	22.6439	22.9204	22.0651	21.7636	22.1555	22.2327	22.6878			0.0533527	0.884397	0.0596021	1.04218
P62701;Q8TD47;C9JEH7;P22090	40S ribosomal protein S4, X isoform	P62701	RPS4X	25.4583	25.4075	25.7512	25.4992	25.2269	25.7111	26.2168	26.0928	26.3355			0.124348	0.751021	0.0599569	1.04243
P62081;B5MCP9	40S ribosomal protein S7	P62081;B5MCP9	RPS7	23.0507	23.1707	24.2013	23.2661	23.6106	23.366	24.2081	24.1379	24.2106			0.0545153	0.882033	0.0599613	1.04244
F8VPD4;P27708;H7C2E4;H7BZB3;H7C3Z5	CAD protein;Glutamine-dependent carbamoyl-phosphate synthase;Aspartate carbamoyltransferase;Dihydroorotase	F8VPD4;P27708	CAD	24.4092	24.3086	24.3924	24.4797	24.2248	24.225	24.8688	24.8153	24.9693			0.266167	0.541792	0.0602487	1.04265
J3KN36;A0A0G2JN29;A0A087X117;Q15155;P69849;Q5JPE7;A0A0G2JP90;A0A087WW46;A0A087WTD5;I3L0Q6;H3BTW1;H3BUC9;H3BPS9	Nodal modulator 1;Nodal modulator 3;Nodal modulator 2	J3KN36;A0A0G2JN29;A0A087X117;Q15155;P69849;Q5JPE7;A0A0G2JP90;A0A087WW46	NOMO3;NOMO1;NOMO2	23.5115	23.5006	23.1461	23.1933	23.4691	23.3083	23.5619	23.606	23.5201			0.162961	0.68713	0.0624879	1.04427
P61586	Transforming protein RhoA	P61586	RHOA	21.2483	21.0523	21.1109	20.8848	20.88	21.4586	22.2667	22.1302	22.245			0.113253	0.770455	0.0626596	1.04439
P31942	Heterogeneous nuclear ribonucleoprotein H3	P31942	HNRNPH3	23.7404	24.377	24.4689	24.4054	23.994	23.9968	23.5316	23.4259	23.7102			0.0841466	0.82386	0.0633793	1.04491
P54136;E5RJM9	Arginine--tRNA ligase, cytoplasmic	P54136	RARS	24.0195	23.5582	23.6968	24.0189	23.465	23.5976	24.3543	24.377	24.4064			0.107705	0.780359	0.0643514	1.04561
Q9UNZ2;F2Z2K0	NSFL1 cofactor p47	Q9UNZ2	NSFL1C	21.9216	20.7598	20.3424	20.9916	21.2295	20.6094	20.2185	20.195	20.3902			0.0434737	0.904745	0.0644538	1.04569
P08670;B0YJC4;B0YJC5;Q5JVS8;P17661;H7C5W5	Vimentin	P08670;B0YJC4	VIM	24.6033	24.8968	26.0209	25.2905	25.0439	24.992	25.4371	25.5605	25.5335			0.0504329	0.890363	0.0648607	1.04598
P26358;K7EIZ6;K7EMU8;K7EJL0	DNA (cytosine-5)-methyltransferase 1	P26358	DNMT1	22.5116	22.5374	22.1897	22.3636	22.2486	22.4267	22.102	22.2706	22.4901			0.209152	0.6178	0.0666542	1.04729
Q5SRN7;Q5SRN5;P04439;P13746;A0A0G2JI36;A0A0G2JIF2;A0A0G2JL56;P30455;P30443;P30459;P16188;P05534;A0A140T975;A0A140T955;A0A140T933;Q9GJ45;A0A0G2JNY4;A0A140T9I0;A0A140T9X5;A0A140T913;P01893;P10314;P30457;P30453;P16190;P16189;P10316;P01892;P01891;Q09160	HLA class I histocompatibility antigen, A-3 alpha chain;HLA class I histocompatibility antigen, A-11 alpha chain;HLA class I histocompatibility antigen, A-36 alpha chain;HLA class I histocompatibility antigen, A-1 alpha chain;HLA class I histocompatibility antigen, A-74 alpha chain;HLA class I histocompatibility antigen, A-30 alpha chain;HLA class I histocompatibility antigen, A-24 alpha chain	Q5SRN7;Q5SRN5;P04439;P13746;A0A0G2JI36;A0A0G2JIF2;A0A0G2JL56;P30455;P30443;P30459;P16188;P05534	HLA-A	22.3271	22.345	23.4784	23.065	22.4467	22.4374	23.5553	23.5445	23.48			0.0532592	0.884587	0.0670821	1.0476
M0R299;M0QXL5;P22087;M0R2Q4;M0R0P1;M0R2U2;M0R1H0;M0R2B0	rRNA 2-O-methyltransferase fibrillarin	M0R299;M0QXL5;P22087;M0R2Q4;M0R0P1	FBL	24.5479	24.5885	24.5918	24.4587	24.5377	24.5258	24.6023	24.4005	24.6732			1.13889	0.0726286	0.0686639	1.04874
Q9UBB4;B1AHE4;B1AHE3	Ataxin-10	Q9UBB4	ATXN10	22.5769	22.8655	22.7777	22.8037	22.5095	22.6983	23.4529	23.1487	22.9752			0.223965	0.597084	0.0695197	1.04937
O15498	Synaptobrevin homolog YKT6	O15498	YKT6	20.7852	21.0388	21.9736	21.1995	21.6475	20.7391	21.0687	21.3804	20.5024			0.0544407	0.882184	0.0705007	1.05008
P46783;F6U211;S4R435;Q9NQ39	40S ribosomal protein S10;Putative 40S ribosomal protein S10-like	P46783;F6U211;S4R435;Q9NQ39	RPS10;RPS10-NUDT3;RPS10P5	23.4162	23.3928	24.381	24.0505	23.1692	23.7501	23.7242	24.0074	23.6486			0.061257	0.868446	0.0734081	1.0522
Q8TEM1	Nuclear pore membrane glycoprotein 210	Q8TEM1	NUP210	25.6094	25.425	25.5879	25.3693	25.3613	25.6709	26.0531	25.9765	26.1492			0.248394	0.564425	0.0736116	1.05235
P14550;V9GYG2;V9GYP9;Q5T621	Alcohol dehydrogenase [NADP(+)]	P14550;V9GYG2;V9GYP9;Q5T621	AKR1A1	19.2304	21.2133	21.6352	22.2532	20.7189	18.884	21.0957	21.0961	21.0789			0.0202169	0.954516	0.0742849	1.05284
Q13363;D6RAX2;E7ESU7;E7EPF8;H0Y8W7;H0Y9M9;E9PGB1;A0A087WYL1;E7EUB3;Q5SQP8;P56545	C-terminal-binding protein 1	Q13363;D6RAX2;E7ESU7;E7EPF8;H0Y8W7	CTBP1	21.135	21.21	20.9418	21.4711	20.398	21.1948	20.8911	20.8322	21.2482			0.0790476	0.83359	0.0743109	1.05286
P46778;G3V1B3;M0R181	60S ribosomal protein L21	P46778;G3V1B3;M0R181	RPL21	24.131	24.3322	24.2166	23.9161	24.4815	24.0548	25.1177	24.752	25.2208			0.157986	0.695047	0.0758031	1.05395
Q9H3N1;G3V448	Thioredoxin-related transmembrane protein 1	Q9H3N1	TMX1	23.7102	23.0367	23.3983	23.1684	23.3088	23.4399	23.9858	24.0508	23.9758			0.13348	0.735394	0.0760288	1.05411
Q5QPL9;Q9UKM9;Q5QPM1;Q5QPM0;Q5QPM2	RNA-binding protein Raly	Q5QPL9;Q9UKM9;Q5QPM1;Q5QPM0	RALY	24.005	24.1806	24.3782	24.0212	24.1084	24.2033	24.0373	23.5134	23.8126			0.254801	0.55616	0.0769253	1.05477
A0A087WXW3;Q9Y3P8	Signaling threshold-regulating transmembrane adapter 1	A0A087WXW3;Q9Y3P8	SIT1	20.5568	20.1441	19.8925	19.8072	20.1258	20.4279	20.355	20.9819	20.4739			0.105891	0.783627	0.0774721	1.05517
O60264;A0A0A0MRP6;B7ZLQ5;P28370	SWI/SNF-related matrix-associated actin-dependent regulator of chromatin subfamily A member 5	O60264	SMARCA5	23.0993	22.8924	22.641	22.5434	22.7024	23.1538	23.3376	23.6263	23.4837			0.126134	0.74794	0.0777448	1.05537
Q96HE7;G3V3E6;G3V5B3;G3V503	ERO1-like protein alpha	Q96HE7;G3V3E6	ERO1L	22.3227	22.1618	22.7705	22.6495	21.9644	22.4077	22.6205	22.3089	23.0339			0.10335	0.788225	0.0778173	1.05542
P35232;C9JW96;C9JZ20;E7ESE2;E9PCW0;D6RBK0	Prohibitin	P35232;C9JW96;C9JZ20;E7ESE2;E9PCW0	PHB	23.7447	24.1463	24.7763	24.5865	23.7895	24.055	24.2935	24.5462	24.3662			0.0725073	0.846238	0.0787684	1.05612
P63173;J3KT73;J3QL01	60S ribosomal protein L38	P63173	RPL38	21.3455	21.8089	20.9384	21.3795	21.1518	21.3249	22.2522	21.9065	21.5399			0.109384	0.777348	0.0788485	1.05617
O95202	LETM1 and EF-hand domain-containing protein 1, mitochondrial	O95202	LETM1	23.486	22.9356	23.532	23.3127	22.994	23.4087	23.5272	23.4686	23.6459			0.12709	0.746294	0.0793724	1.05656
P60842;J3KT12;J3QS69;J3KTB5;J3KSZ0;J3QL43;J3QR64;J3KTN0;J3QLN6;J3KS25;J3QKZ9;J3QL52;J3KT04;J3KS93;J3QQP0	Eukaryotic initiation factor 4A-I	P60842;J3KT12;J3QS69;J3KTB5;J3KSZ0;J3QL43	EIF4A1	25.1866	25.6741	25.8125	25.6278	25.3941	25.4129	26.086	25.9026	25.9712			0.144657	0.716709	0.0795059	1.05666
P13667;C9JMN9	Protein disulfide-isomerase A4	P13667	PDIA4	23.3056	23.3214	24.29	23.6415	23.3915	23.6435	24.0361	24.2487	23.6219			0.0845024	0.823185	0.0801767	1.05715
P04843;B7Z4L4;F8WF32	Dolichyl-diphosphooligosaccharide--protein glycosyltransferase subunit 1	P04843;B7Z4L4	RPN1	25.2123	25.2415	25.5351	25.4793	25.1073	25.1581	25.7848	25.7756	25.814			0.201846	0.628281	0.0814228	1.05806
P07384;E9PL37;E9PLX0;E9PJJ3;E9PLC9;E9PMC6;E9PJA6;E9PSA6;E9PQB3;E9PRM1;E9PIA9	Calpain-1 catalytic subunit	P07384	CAPN1	22.006	22.0617	21.8439	21.7232	21.8646	22.0786	21.9171	22.0455	22.1799			0.267336	0.540336	0.0817305	1.05829
Q86VP6;A0A0C4DGH5;H0YH27	Cullin-associated NEDD8-dissociated protein 1	Q86VP6;A0A0C4DGH5	CAND1	23.9793	24.014	24.5029	24.2652	23.8482	24.1349	24.6629	24.5883	24.7543			0.14697	0.712903	0.0826492	1.05896
Q13724;C9J8D4;C9JDQ1;B8ZZE2	Mannosyl-oligosaccharide glucosidase	Q13724;C9J8D4	MOGS	21.4718	21.3675	21.2645	21.3446	21.2065	21.3041	21.6914	21.7308	22.0254			0.498882	0.317043	0.0828749	1.05913
P42704;A0A0C4DG06;B8ZZ38;C9JCA9;A0A0C4DG51;Q9NP80	Leucine-rich PPR motif-containing protein, mitochondrial	P42704	LRPPRC	27.9787	27.8363	27.5458	27.2271	28.0205	27.8554	25.9745	25.9383	26.0711			0.114242	0.768702	0.0859807	1.06141
P25685;M0R080;M0QYT3;M0QXK0;M0R1D6;M0QZD0;M0R128;Q9UDY4	DnaJ homolog subfamily B member 1	P25685;M0R080	DNAJB1	22.7419	23.1187	23.2234	23.3387	22.3903	23.0926	23.5129	23.418	23.5459			0.0980845	0.79784	0.0874761	1.06251
Q9Y6A4	Cilia- and flagella-associated protein 20	Q9Y6A4	CFAP20	21.3754	21.3199	21.5522	21.4534	21.0575	21.4728	21.6909	21.948	22.0912			0.22567	0.594744	0.0879421	1.06285
P05141	ADP/ATP translocase 2;ADP/ATP translocase 2, N-terminally processed	P05141	SLC25A5	26.34	26.567	26.389	26.333	26.4078	26.2906	26.3826	26.3447	26.4887			0.500612	0.315782	0.0882486	1.06308
Q96CS3	FAS-associated factor 2	Q96CS3	FAF2	21.7047	20.1179	21.5568	20.5164	21.145	21.4522	21.798	21.338	21.8717			0.0529515	0.885214	0.0886129	1.06335
E9PCY7;G8JLB6;P31943;D6RIT2;D6RIU0;D6RBM0;H0YB39;E7EQJ0;D6RAM1;D6R9T0;D6RFM3;D6RDU3;D6RJ04;D6RIH9;H0YBG7;H0YBD7;E5RGV0;E7EN40;D6RDL0;E5RGH4;D6RF17;H0YAQ2;D6R9D3	Heterogeneous nuclear ribonucleoprotein H;Heterogeneous nuclear ribonucleoprotein H, N-terminally processed	E9PCY7;G8JLB6;P31943;D6RIT2;D6RIU0;D6RBM0;H0YB39	HNRNPH1	25.7378	26.3153	26.479	26.065	26.1273	26.0622	25.7439	25.674	25.9237			0.153034	0.703017	0.092521	1.06623
P07305	Histone H1.0;Histone H1.0, N-terminally processed	P07305	H1F0	23.8302	23.5879	22.5182	22.8525	23.8535	22.9509	22.0336	21.6871	21.3615			0.0630303	0.864908	0.093167	1.06671
H3BS72;Q9P035;H3BPZ1	Very-long-chain (3R)-3-hydroxyacyl-CoA dehydratase 3	H3BS72;Q9P035;H3BPZ1	HACD3	22.0819	22.0382	20.934	21.2623	22.2105	21.3006	21.1224	21.0865	21.3479			0.0670397	0.85696	0.0935707	1.06701
P09429;Q5T7C4;B2RPK0;P23497	High mobility group protein B1	P09429;Q5T7C4	HMGB1	23.6187	24.3333	24.5829	24.2676	23.5852	24.3979	24.5793	24.7593	25.1612			0.0878093	0.816941	0.0947596	1.06789
Q14137;A0A075B729	Ribosome biogenesis protein BOP1	Q14137	BOP1	22.1245	22.0931	21.6591	21.7219	21.7191	22.1464	21.8954	22.0854	21.98			0.177147	0.665048	0.0964343	1.06913
Q9Y265;H7C4G5;E7ETR0;J3QLR1;H7C4I3	RuvB-like 1	Q9Y265	RUVBL1	23.8556	23.7594	24.1164	24.0607	23.3665	24.0143	24.3867	24.3066	24.3635			0.144589	0.716821	0.0966263	1.06927
Q7Z6Z7;H0Y659	E3 ubiquitin-protein ligase HUWE1	Q7Z6Z7	HUWE1	20.9046	20.9104	20.4181	20.7459	20.7249	20.466	21.9846	21.2237	21.6984			0.204662	0.624221	0.0987225	1.07082
P50416;H3BMD2;H3BUJ0;H3BP22;H3BUV7	Carnitine O-palmitoyltransferase 1, liver isoform	P50416	CPT1A	23.0395	22.3694	23.1312	22.8882	22.8379	22.5112	23.2219	23.0861	23.2152			0.139547	0.725191	0.100944	1.07247
Q14566	DNA replication licensing factor MCM6	Q14566	MCM6	24.5585	24.0385	24.7465	24.3782	24.1204	24.5368	24.9458	25.0125	24.9725			0.157652	0.695581	0.102673	1.07376
Q14974;J3KTM9;J3QR48;J3QKQ5	Importin subunit beta-1	Q14974;J3KTM9	KPNB1	24.1514	24.2909	24.7809	24.378	24.1347	24.399	24.6922	24.9609	24.8717			0.190367	0.645108	0.103865	1.07465
B1ANM7;Q9UNN5	FAS-associated factor 1	B1ANM7;Q9UNN5	FAF1	22.7586	19.289	19.5504	20.5495	19.9939	20.7428	19.5123	19.4869	19.6078			0.0307554	0.931632	0.103905	1.07468
P18669;P15259;Q8N0Y7	Phosphoglycerate mutase 1	P18669	PGAM1	23.4331	24.0211	25.0687	24.8887	23.4301	23.8913	24.5376	24.6048	24.6876			0.0559512	0.879121	0.10428	1.07496
P46940;A0A0J9YXZ5;H0YLE8;A0A087WWP1	Ras GTPase-activating-like protein IQGAP1	P46940;A0A0J9YXZ5;H0YLE8	IQGAP1	22.955	23.8151	23.7427	23.3827	23.4021	23.4135	24.1365	23.9668	24.1279			0.140873	0.722982	0.104831	1.07537
P13073;Q86WV2;H3BN72;H3BNV9;H3BNI5;H3BPG0	Cytochrome c oxidase subunit 4 isoform 1, mitochondrial	P13073;Q86WV2;H3BN72;H3BNV9	COX4I1	22.5676	21.8485	23.4712	22.1118	22.4089	23.0518	23.0675	22.8047	23.1123			0.0671302	0.856781	0.104926	1.07544
P49257	Protein ERGIC-53	P49257	LMAN1	23.0818	22.8863	23.3681	22.8813	23.1179	23.0219	23.386	23.4273	23.5799			0.269766	0.537321	0.105043	1.07553
O95347;Q5T821;A0A0C4DGE5	Structural maintenance of chromosomes protein 2	O95347	SMC2	24.5882	24.7509	24.2557	24.4002	24.3871	24.4906	24.9986	25.0979	25.0483			0.285419	0.518299	0.105626	1.07596
P78371;F5GWF6;F8VQ14	T-complex protein 1 subunit beta	P78371;F5GWF6;F8VQ14	CCT2	25.4585	25.3533	25.6296	25.5743	25.1345	25.409	25.9134	25.9864	26.0882			0.287682	0.515606	0.107864	1.07763
Q9Y3F4;H0YH33	Serine-threonine kinase receptor-associated protein	Q9Y3F4;H0YH33	STRAP	22.1836	22.5663	22.495	22.6737	21.9893	22.2558	22.0624	22.3643	22.2053			0.178621	0.662794	0.108704	1.07826
P51659;E7EWE5;E7ER27;G5E9S2;E7ET17;E7EPL9	Peroxisomal multifunctional enzyme type 2;(3R)-hydroxyacyl-CoA dehydrogenase;Enoyl-CoA hydratase 2	P51659;E7EWE5;E7ER27;G5E9S2;E7ET17	HSD17B4	24.088	24.3753	24.2941	24.211	23.962	24.2582	24.56	24.4157	24.4497			0.361399	0.435112	0.108751	1.07829
P53999	Activated RNA polymerase II transcriptional coactivator p15	P53999	SUB1	22.1697	22.2838	21.9736	22.0491	21.7198	22.3296	22.8196	22.5874	22.5995			0.214811	0.609802	0.109533	1.07888
Q5VTE0;P68104;A0A087WVQ9;A0A087WV01;Q05639;A6PW80;Q5JR01	Putative elongation factor 1-alpha-like 3;Elongation factor 1-alpha 1;Elongation factor 1-alpha;Elongation factor 1-alpha 2	Q5VTE0;P68104;A0A087WVQ9;A0A087WV01;Q05639	EEF1A1P5;EEF1A1;EEF1A2	28.6614	28.8914	28.8499	28.9296	28.4504	28.6914	29.2949	29.4394	29.4485			0.286951	0.516475	0.110454	1.07957
X6RKY7;X6RA30;O75794;X6RF82	Cell division cycle protein 123 homolog	X6RKY7;X6RA30;O75794;X6RF82	CDC123	21.5761	19.5986	19.39	19.5276	19.9643	20.7385	21.2837	19.5112	19.85			0.0489127	0.893485	0.111439	1.08031
Q9UJZ1;A0A087WYB4;F2Z2I8	Stomatin-like protein 2, mitochondrial	Q9UJZ1;A0A087WYB4	STOML2	22.8696	23.425	24.4223	23.8303	23.2466	23.302	24.2919	24.1598	24.2645			0.081071	0.829715	0.112661	1.08122
P60709;G5E9R0;E7EVS6;Q562R1;Q6S8J3;C9JTX5;C9JZR7;C9JUM1;A5A3E0;P0CG38;P0CG39;F8WCH0;Q9BYX7	Actin, cytoplasmic 1;Actin, cytoplasmic 1, N-terminally processed	P60709	ACTB	30.0761	30.3073	30.9839	30.4844	30.1835	30.3596	30.718	30.5271	30.6468			0.147266	0.712416	0.113218	1.08164
P62424;Q5T8U3;Q5T8U2	60S ribosomal protein L7a	P62424;Q5T8U3;Q5T8U2	RPL7A	26.1882	26.1804	25.7704	26.02	25.8088	25.9676	26.3483	26.4573	26.6784			0.306393	0.493864	0.114225	1.08239
Q5BKZ1;A0A0A0MRN4;E2QRN4	DBIRD complex subunit ZNF326	Q5BKZ1;A0A0A0MRN4	ZNF326	22.5875	22.6016	22.1294	22.2334	22.7356	22.0056	21.4429	21.4584	20.9947			0.162242	0.688268	0.114644	1.08271
K7EQ48;P06744;A0A0A0MTS2;A0A0J9YXP8;A0A0J9YX90;A0A0J9YYH3;K7EPY4;K7EP41;K7ELR7;K7ENA0;K7ERC6;CON__Q3ZBD7;K7ERK8;K7EIL4;K7ESF4;Q8N196	Glucose-6-phosphate isomerase	K7EQ48;P06744;A0A0A0MTS2;A0A0J9YXP8;A0A0J9YX90;A0A0J9YYH3;K7EPY4	GPI	23.7315	23.4822	23.8575	23.7946	23.4148	23.5134	23.8864	23.7146	24.1639			0.297344	0.504262	0.116121	1.08382
Q9Y277;E5RJN6;E5RHZ6;E5RFP6;E5RHE1;E5RK27;E5RFL1	Voltage-dependent anion-selective channel protein 3	Q9Y277;E5RJN6;E5RHZ6;E5RFP6	VDAC3	23.8773	23.66	24.7629	24.2357	24.0045	23.7103	24.5994	24.2977	24.2974			0.114357	0.768499	0.116548	1.08414
P22626;A0A087WUI2	Heterogeneous nuclear ribonucleoproteins A2/B1	P22626;A0A087WUI2	HNRNPA2B1	26.9063	26.8046	27.153	26.5015	26.9799	27.0327	25.8034	26.0883	25.769			0.230898	0.587628	0.116639	1.08421
P14174	Macrophage migration inhibitory factor	P14174	MIF	23.4039	23.837	23.4405	23.781	23.2132	23.3372	23.9414	24.0604	23.7605			0.203655	0.625669	0.116721	1.08427
P13489;E9PMJ3;E9PLZ3;E9PIM9;E9PMN0;E9PIK5;E9PMA9;H0YCR7;E9PR82;E9PMI1	Ribonuclease inhibitor	P13489;E9PMJ3;E9PLZ3;E9PIM9;E9PMN0;E9PIK5	RNH1	23.6459	23.1986	23.4828	23.1322	23.2421	23.5987	23.6376	23.3589	23.541			0.242762	0.571792	0.118152	1.08534
Q13813;A0A0D9SFF6;A0A0D9SFH4	Spectrin alpha chain, non-erythrocytic 1	Q13813	SPTAN1	24.4819	24.7242	25.5547	24.8347	24.6347	24.9367	25.2632	25.2671	25.499			0.128904	0.743184	0.118249	1.08542
P30050	60S ribosomal protein L12	P30050	RPL12	25.4331	25.314	26.0422	25.6134	25.0372	25.7791	25.7137	25.9505	26.022			0.139211	0.725753	0.119857	1.08663
Q15046;H3BVA8;H3BRC9;J3KRL2;H3BPV7	Lysine--tRNA ligase	Q15046	KARS	23.7793	24.1176	23.924	24.0185	23.5465	23.8954	24.1154	24.2945	24.1904			0.281157	0.523412	0.120128	1.08683
F8W1N5;F8VZJ2;F8VNW4;F8W0W4;H0YHX9;Q13765;E9PAV3;F8VZ58;Q9BZK3	Nascent polypeptide-associated complex subunit alpha;Nascent polypeptide-associated complex subunit alpha, muscle-specific form	F8W1N5;F8VZJ2;F8VNW4;F8W0W4;H0YHX9;Q13765;E9PAV3	NACA	23.6438	23.359	23.4601	23.2012	23.1877	23.7096	24.1	24.1298	24.0398			0.252519	0.559089	0.121496	1.08786
E9PGC8;P78559	Microtubule-associated protein 1A;MAP1A heavy chain;MAP1 light chain LC2	E9PGC8;P78559	MAP1A	20.0376	20.0776	20.0362	19.5159	20.3433	19.9233	19.6194	20.0858	20.1385			0.197669	0.634352	0.12296	1.08897
O75934	Pre-mRNA-splicing factor SPF27	O75934	BCAS2	21.7834	21.9706	20.2333	21.1492	21.7732	20.6956	19.9734	18.697	19.9426			0.0678828	0.855298	0.123089	1.08906
Q99459	Cell division cycle 5-like protein	Q99459	CDC5L	22.3234	22.8239	22.871	22.7164	22.4077	22.518	23.0566	23.0664	23.0838			0.252368	0.559283	0.12539	1.0908
P51665;H3BNT7;H3BTM8;H3BQV2	26S proteasome non-ATPase regulatory subunit 7	P51665;H3BNT7;H3BTM8	PSMD7	22.2543	20.2664	21.6633	20.4776	21.0136	22.3151	21.6285	21.4158	21.5391			0.0540159	0.883048	0.125875	1.09117
P11413;E7EUI8;E9PD92;E7EM57	Glucose-6-phosphate 1-dehydrogenase	P11413;E7EUI8	G6PD	21.5922	22.4171	22.8243	22.0462	22.3798	22.0276	22.8085	23.0601	23.0258			0.121655	0.755692	0.126645	1.09175
P27348;E9PG15	14-3-3 protein theta	P27348;E9PG15	YWHAQ	22.3806	22.6786	23.6721	22.7767	22.9313	22.6421	22.8528	23.7653	23.2939			0.115635	0.76624	0.12705	1.09206
Q8N1G4	Leucine-rich repeat-containing protein 47	Q8N1G4	LRRC47	21.0048	21.3845	22.1277	21.6492	21.2862	21.195	21.7913	21.7115	22.0014			0.132585	0.736911	0.128871	1.09344
P50990;H7C4C8;H7C2U0	T-complex protein 1 subunit theta	P50990	CCT8	26.5056	26.4161	26.556	26.3386	26.0526	26.6999	26.7867	27.0234	26.8891			0.26902	0.538245	0.128874	1.09344
H0YLA2;P37108	Signal recognition particle 14 kDa protein	H0YLA2;P37108	SRP14	22.2245	22.3054	22.4673	22.5162	22.2362	21.8576	22.6451	22.5656	22.5961			0.251183	0.560811	0.129066	1.09359
P50991	T-complex protein 1 subunit delta	P50991	CCT4	25.8739	26.0361	26.2226	26.2133	25.6329	25.8986	26.5667	26.5334	26.698			0.263631	0.544966	0.129264	1.09374
F6VRR5;Q9BY77;Q8WUT1;F8WCX5;Q6R954;F8WEE2	Polymerase delta-interacting protein 3	F6VRR5;Q9BY77;Q8WUT1;F8WCX5	POLDIP3	22.9662	23.0984	22.5827	22.8053	22.5601	22.8918	22.8138	22.8663	23.0155			0.285381	0.518345	0.130029	1.09432
P63104;E7EX29;B0AZS6;B7Z2E6;H0YB80;E7ESK7;E5RIR4;E9PD24;E7EVZ2;E5RGE1	14-3-3 protein zeta/delta	P63104;E7EX29;B0AZS6;B7Z2E6;H0YB80;E7ESK7	YWHAZ	24.6635	24.4976	25.6158	24.8616	24.9545	24.5706	25.1229	25.2201	25.0897			0.130216	0.740942	0.130089	1.09436
P41250;F8WCK4	Glycine--tRNA ligase	P41250	GARS	22.7825	22.8152	22.5747	22.5368	22.5904	22.6541	22.8507	22.4989	22.8908			0.722078	0.189637	0.130356	1.09456
B1AHB1;P33992;B1AHB2;B1AHA9	DNA helicase;DNA replication licensing factor MCM5	B1AHB1;P33992	MCM5	24.2307	24.3398	24.5638	24.4257	23.902	24.4085	24.7655	24.6712	24.6679			0.268407	0.539005	0.132717	1.09636
O75083;D6RD66	WD repeat-containing protein 1	O75083;D6RD66	WDR1	25.537	25.6414	26.0105	25.7904	25.4861	25.5137	25.9368	25.9516	26.0151			0.31313	0.486261	0.132867	1.09647
P11142;E9PKE3;E9PNE6;E9PN89;A8K7Q2;E9PLF4;E9PQQ4;E9PQK7;E9PK54;E9PPY6;E9PN25;E9PI65;E9PS65;E9PM13	Heat shock cognate 71 kDa protein	P11142;E9PKE3;E9PNE6;E9PN89;A8K7Q2	HSPA8	28.9433	28.892	29.4594	29.055	28.8434	28.9974	29.4212	29.292	29.5214			0.278567	0.526542	0.132954	1.09654
Q12874	Splicing factor 3A subunit 3	Q12874	SF3A3	21.967	21.9214	23.2369	22.3892	22.1881	22.1484	22.7711	22.6987	22.4474			0.110163	0.775956	0.133207	1.09673
P30101	Protein disulfide-isomerase A3	P30101	PDIA3	25.2988	25.0899	25.8816	25.3906	25.0933	25.3844	25.6358	25.6817	25.7151			0.201496	0.628787	0.13402	1.09735
P07195;A8MW50;C9J7H8;F5H793;F5H5G7;F5H155;A0A087WUM2;G3XAP5;F5H245;Q6ZMR3;P07864	L-lactate dehydrogenase B chain;L-lactate dehydrogenase	P07195;A8MW50;C9J7H8	LDHB	26.8053	26.7334	27.0304	26.8158	26.4869	26.8634	27.0264	27.3387	27.1816			0.380403	0.416483	0.134332	1.09758
Q5JP53;P07437;Q5ST81;A6NNZ2;K7ESM5;Q9BUF5;G3V2A3;CON__ENSEMBL:ENSBTAP00000025008;Q9H4B7;G3V5W4;G3V2R8;G3V3R4;G3V2N6	Tubulin beta chain	Q5JP53;P07437;Q5ST81	TUBB	27.8726	27.7161	27.9175	27.8068	27.5287	27.7615	27.8886	27.8648	27.9612			0.575083	0.266022	0.136365	1.09913
O43818	U3 small nucleolar RNA-interacting protein 2	O43818	RRP9	19.1589	20.3647	20.1568	19.5745	19.7729	19.9225	20.6318	20.0863	22.0089			0.130426	0.740583	0.136847	1.0995
Q15907;H3BMH2;H3BSC1;P62491;B4DQU5;M0R2D0;A0A0C4DGX5;P57735	Ras-related protein Rab-11B;Ras-related protein Rab-11A	Q15907;H3BMH2;H3BSC1;P62491	RAB11B;RAB11A	24.6063	24.2419	25.1119	24.6432	24.3277	24.5769	24.8895	25.2052	25.125			0.195638	0.637327	0.137479	1.09998
P22307;H0YF61	Non-specific lipid-transfer protein	P22307;H0YF61	SCP2	19.6774	20.7582	21.6426	21.1822	20.3202	20.1619	19.0306	21.16	21.4842			0.0744406	0.84248	0.137948	1.10034
Q16763;K7EPJ1;K7EM75	Ubiquitin-conjugating enzyme E2 S	Q16763;K7EPJ1	UBE2S	22.8814	22.9147	22.1427	22.694	22.2959	22.5329	22.8737	22.9378	22.8684			0.191646	0.643212	0.138672	1.10089
P04818	Thymidylate synthase	P04818	TYMS	20.8224	21.9637	21.5641	21.691	21.9244	20.3164	21.7236	21.5623	21.5683			0.0817597	0.8284	0.139469	1.1015
P13639	Elongation factor 2	P13639	EEF2	27.216	27.1895	27.5779	27.3801	26.9786	27.1986	27.8561	27.7734	27.9025			0.344587	0.452285	0.142055	1.10348
Q13177;A0A087X294;O75914;H7C1X3;E9PM17;B3KNX7;Q13153;B1AKS5;H0YCG5	Serine/threonine-protein kinase PAK 2;PAK-2p27;PAK-2p34	Q13177	PAK2	22.9162	22.8882	23.7323	23.0789	22.9073	23.1216	23.658	23.7989	23.5181			0.192688	0.64167	0.142962	1.10417
P00338;F5GYU2;F5GXY2;F5GXH2;F5GZQ4;F5H5J4;F5H6W8;F5H8H6;F5GXC7;F5GWW2;F5GXU1	L-lactate dehydrogenase A chain	P00338;F5GYU2;F5GXY2	LDHA	25.8671	25.8271	26.0694	25.6363	25.7851	25.9114	26.2361	26.0329	26.2154			0.586443	0.259153	0.143618	1.10467
P61247;D6RG13;D6RAT0;H0Y9Y4;E9PFI5;D6RB09;H0Y8L7;D6R9B6;D6RAS7;D6RI02;D6RED7;D6RGE0	40S ribosomal protein S3a	P61247;D6RG13;D6RAT0;H0Y9Y4;E9PFI5;D6RB09;H0Y8L7;D6R9B6	RPS3A	25.3957	25.1102	25.7116	25.2996	25.1126	25.3726	25.7005	25.7046	25.8668			0.309454	0.490395	0.144228	1.10514
P45974	Ubiquitin carboxyl-terminal hydrolase 5	P45974	USP5	22.0119	21.9173	21.9439	21.7554	21.868	21.8162	22.0301	22.0224	22.1361			1.54673	0.028397	0.144478	1.10533
O14745;J3QRP6	Na(+)/H(+) exchange regulatory cofactor NHE-RF1	O14745;J3QRP6	SLC9A3R1	21.4672	22.0585	22.7023	21.8789	22.0022	21.9062	22.5341	22.4049	22.3323			0.153015	0.703047	0.14691	1.1072
P04075;J3KPS3;H3BQN4;ALDOA_RABIT;H3BPS8;H3BUH7;H3BR04;H3BMQ8;H3BU78;H3BR68;A0A087WXX2;P05062	Fructose-bisphosphate aldolase A;Fructose-bisphosphate aldolase	P04075;J3KPS3;H3BQN4;ALDOA_RABIT;H3BPS8;H3BUH7;H3BR04;H3BMQ8	ALDOA	26.5305	26.6833	27.2548	26.9952	26.3032	26.7294	26.9209	26.9767	27.0759			0.188078	0.648518	0.146932	1.10721
A0A024R4M0;P46781;B5MCT8;C9JM19;F2Z3C0;A8MXK4	40S ribosomal protein S9	A0A024R4M0;P46781;B5MCT8;C9JM19	RPS9	25.3443	24.9693	25.5544	25.1286	24.9134	25.3845	25.866	25.8363	25.8926			0.269458	0.537702	0.14723	1.10744
Q9NTJ3;E9PD53;C9JR83;C9JVD8;C9J578;C9J9E4;C9JWF0;C9IYK2;C9JJ64	Structural maintenance of chromosomes protein 4;Structural maintenance of chromosomes protein	Q9NTJ3;E9PD53	SMC4	23.4833	23.2639	23.0466	23.2961	22.8585	23.1968	23.762	23.3419	23.5702			0.33227	0.465297	0.147443	1.1076
J3KQ32;Q9NTK5;C9JTK6	Obg-like ATPase 1	J3KQ32;Q9NTK5;C9JTK6	OLA1	20.7849	20.2355	20.2974	20.034	21.0858	19.7545	19.8556	20.1254	20.2287			0.122488	0.754243	0.147855	1.10792
Q92979;A0A087WVM7;V9GYP5;A0A087WWQ2	Ribosomal RNA small subunit methyltransferase NEP1	Q92979;A0A087WVM7;V9GYP5;A0A087WWQ2	EMG1	22.3221	21.9553	22.2392	22.3613	22.1996	21.5101	22.827	22.6056	22.3136			0.201939	0.628147	0.148537	1.10845
E7EV99;E7ENY0;P35611;A0A0A0MSR2;H0Y9H2;D6RF25	Alpha-adducin	E7EV99;E7ENY0;P35611;A0A0A0MSR2;H0Y9H2	ADD1	21.0057	20.6756	21.2278	21.0236	20.5997	20.839	21.0611	21.2414	21.2603			0.299522	0.501739	0.148937	1.10875
Q9NX20;E9PI14	39S ribosomal protein L16, mitochondrial	Q9NX20	MRPL16	20.5735	20.8455	20.2461	19.9411	20.8041	20.4703	21.4346	20.9879	19.5219			0.187665	0.649134	0.149871	1.10947
Q86V81;E9PB61	THO complex subunit 4	Q86V81;E9PB61	ALYREF	23.6687	23.8729	24.4721	23.9188	23.7401	23.9036	23.9015	23.9883	24.1801			0.239105	0.576627	0.150398	1.10988
P49756;E9PQU5	RNA-binding protein 25	P49756;E9PQU5	RBM25	21.3355	22.0123	22.8345	21.2227	22.0943	22.4118	21.0232	21.1338	21.0717			0.0964873	0.800779	0.15114	1.11045
P13796;Q5TBN3;A0A0A0MSQ0;P13797;Q5TBN5;U3KQI3;Q14651;H7C4N2;C9JAM8	Plastin-2	P13796	LCP1	26.5636	26.4141	27.0766	26.8534	26.2174	26.5297	27.4035	27.2792	27.3468			0.21632	0.607687	0.151272	1.11055
A0A087WXS7;O43681;K7ERW9	ATPase ASNA1	A0A087WXS7;O43681	ASNA1	21.8398	20.3001	20.5535	21.0117	20.7325	20.4944	20.546	20.5899	20.8963			0.109754	0.776686	0.15158	1.11079
K7ENH2;K9J957;P61289;K7ESG5;A0A087WTV2;B3KQ25;K7EMD0;K7EPX6;K7EKR3;B7Z8D3;K7EJF8	Proteasome activator complex subunit 3	K7ENH2;K9J957;P61289;K7ESG5;A0A087WTV2;B3KQ25	PSME3	20.5988	21.516	21.4898	21.2811	20.8849	20.9811	21.0584	21.0681	21.1755			0.178846	0.662452	0.152566	1.11154
Q9Y2Z0	Suppressor of G2 allele of SKP1 homolog	Q9Y2Z0	SUGT1	19.5822	21.0714	22.1005	20.9222	21.071	20.3	21.1057	21.4271	21.2819			0.0699483	0.851239	0.153632	1.11237
H7C2W9;C9JU56;B7Z4E3;B7Z4C8;P62899;B8ZZK4	60S ribosomal protein L31	H7C2W9;C9JU56;B7Z4E3;B7Z4C8;P62899;B8ZZK4	RPL31	25.3032	25.0365	24.4488	24.6573	24.7756	24.8878	24.8085	24.6932	25.334			0.234827	0.582335	0.15595	1.11415
P14324;A0A087X1D8;A0A087WVN4;A0A087WTP2;A0A087X090	Farnesyl pyrophosphate synthase	P14324;A0A087X1D8;A0A087WVN4	FDPS	23.108	22.8088	23.3086	23.3756	22.4679	22.9087	23.2733	23.2826	23.2045			0.203103	0.626465	0.157694	1.1155
Q9Y5B9;G3V5A4;G3V401;G3V2X0	FACT complex subunit SPT16	Q9Y5B9	SUPT16H	24.5975	24.6506	24.2126	24.3481	24.3092	24.3279	24.3292	24.538	24.6397			0.500068	0.316178	0.158506	1.11613
E9PK01;P29692;A0A087X1X7;E9PRY8;E9PQ49;E9PI39;E9PPR1;E9PL12;E9PL71;E9PQZ1;E9PMW7;E9PN91;E9PIZ1;H0YCK7;H0YE58;E9PK06;H0YE72;E9PQC9;E9PKK3;E9PK72;E9PNW6;E9PJD0	Elongation factor 1-delta	E9PK01;P29692;A0A087X1X7;E9PRY8;E9PQ49;E9PI39;E9PPR1;E9PL12;E9PL71;E9PQZ1;E9PMW7	EEF1D	23.0723	23.9897	24.7039	24.0089	23.4751	23.7963	24.1128	23.9775	24.0805			0.118627	0.76098	0.161893	1.11875
A0A0A6YYL4;I3L1U7;I3L0X9;I3L3T0;Q9Y3D7;P57737	Coronin;Mitochondrial import inner membrane translocase subunit TIM16;Coronin-7	A0A0A6YYL4;I3L1U7;I3L0X9;I3L3T0;Q9Y3D7;P57737	CORO7-PAM16;PAM16;CORO7	21.3071	21.0762	21.4131	20.9597	20.3683	21.979	21.8972	20.7298	21.5295			0.124123	0.75141	0.163161	1.11974
P48643;E7ENZ3;B7ZAR1;E9PCA1;D6RIZ7;H0Y914	T-complex protein 1 subunit epsilon	P48643;E7ENZ3;B7ZAR1;E9PCA1	CCT5	24.4862	24.2608	24.9202	24.5579	24.3325	24.2873	25.0514	24.9183	25.0586			0.316832	0.482134	0.163184	1.11976
C9J9K3;A0A0C4DG17;P08865;F8WD59	40S ribosomal protein SA	C9J9K3;A0A0C4DG17;P08865;F8WD59	RPSA	24.735	24.6568	25.5666	25.077	24.5288	24.8597	24.9302	25.0867	24.9986			0.189362	0.646604	0.16426	1.12059
A0A0G2JIW1;P0DMV9;P0DMV8;V9GZ37	Heat shock 70 kDa protein 1B;Heat shock 70 kDa protein 1A	A0A0G2JIW1;P0DMV9;P0DMV8	HSPA1B;HSPA1A	22.718	23.0599	23.2519	22.8213	22.6737	23.0256	23.4947	23.1982	23.2558			0.382587	0.414394	0.169693	1.12482
A0A087WUK2;O14979	Heterogeneous nuclear ribonucleoprotein D-like	A0A087WUK2;O14979	HNRNPDL	21.9428	21.7863	21.395	21.5314	21.6296	21.4516	21.0993	21.0395	18.3631			0.426359	0.374663	0.170533	1.12547
Q573B4;P06239;E9PAP0;E9PJ92;F8W6B9;E9PKQ8;J3QRU1;P12931;P06241;P07947	Non-specific protein-tyrosine kinase;Tyrosine-protein kinase Lck	Q573B4;P06239;E9PAP0;E9PJ92	LCK	24.3879	24.4368	24.8657	24.3842	24.3932	24.4002	24.718	24.7118	24.8958			0.490537	0.323194	0.170952	1.1258
P31153	S-adenosylmethionine synthase isoform type-2	P31153	MAT2A	21.8773	23.1235	23.3849	23.3254	22.1773	22.3694	23.5598	23.7984	23.3418			0.105459	0.784407	0.171192	1.12599
X6R433;A0A0A0MT22;P08575;M3ZCP1;A0A075B788;E9PKH0;A0A140TA77;A0A140TA68;A0A0G2JNW2	Protein-tyrosine-phosphatase;Receptor-type tyrosine-protein phosphatase C	X6R433;A0A0A0MT22;P08575;M3ZCP1;A0A075B788	PTPRC	23.7331	23.8844	24.4885	23.9193	23.702	23.9704	24.6634	24.6019	24.7567			0.281893	0.522525	0.171472	1.12621
Q14204;H0YJ21	Cytoplasmic dynein 1 heavy chain 1	Q14204	DYNC1H1	22.9131	23.0765	23.1253	23.3058	22.5263	22.7681	23.6031	23.5449	23.6055			0.290114	0.512727	0.171582	1.12629
P35579;Q5BKV1;B1AH99;REV__S4R3H4;REV__E7EQT4;REV__Q9UKV3	Myosin-9	P35579	MYH9	26.8677	27.0515	27.3506	27.0854	26.6882	26.9779	27.6662	27.6394	27.7291			0.396941	0.400921	0.172796	1.12724
P07900;G3V2J8;Q14568;Q58FG0;Q58FG1	Heat shock protein HSP 90-alpha	P07900	HSP90AA1	26.6306	26.718	27.108	26.8767	26.3524	26.7066	26.9801	27.1502	27.1337			0.336553	0.46073	0.173642	1.1279
Q14008;E9PQH5;H0YDX5;H0YCF6;H0YEK7	Cytoskeleton-associated protein 5	Q14008	CKAP5	22.0815	22.3939	22.7359	22.6659	21.6721	22.3513	23.0627	23.3117	23.3514			0.191041	0.644108	0.174023	1.1282
A0A087WX29;Q13148;A0A087WXQ5;A0A087WV68;B1AKP7;G3V162;A0A087X260;A0A087WYY0;A0A087WW61;A0A087WX67;A0A087WXV3;K7EJM5;K7EN94;A0A087WTZ4;K7EL26;A0A087WYE7;A0A087WZC9	TAR DNA-binding protein 43	A0A087WX29;Q13148;A0A087WXQ5;A0A087WV68;B1AKP7;G3V162;A0A087X260;A0A087WYY0;A0A087WW61;A0A087WX67;A0A087WXV3;K7EJM5;K7EN94	TARDBP	21.9423	21.7298	22.2601	21.6822	21.5521	22.1757	22.018	21.9072	21.7844			0.287401	0.515939	0.174064	1.12823
A0A140T8Z0;A0A0G2JH68;O60610;H9KV28;B4E2I7;E5RJ79	Protein diaphanous homolog 1	A0A140T8Z0;A0A0G2JH68;O60610;H9KV28	DIAPH1	22.5168	22.7	23.4135	22.7113	22.8785	22.5119	23.2711	23.2488	23.6173			0.23623	0.580457	0.176193	1.1299
J3KPX7;Q99623;F5GY37;F5GWA7;F5H3X6;F5H2D2;F5H0C5;U3KPZ5	Prohibitin-2	J3KPX7;Q99623;F5GY37;F5GWA7;F5H3X6	PHB2	24.6853	24.5254	25.0748	24.6259	24.3683	24.7614	25.314	25.0744	25.0809			0.37005	0.426531	0.176645	1.13025
A0A024QZP7;P06493;E5RIU6;A0A087WZZ9;K7ELV5;G3V317	Cyclin-dependent kinase 1	A0A024QZP7;P06493;E5RIU6;A0A087WZZ9	CDC2;CDK1	23.5327	23.3852	23.7121	23.4394	23.0932	23.5624	23.4269	23.2801	23.2178			0.453911	0.351632	0.178314	1.13156
O15144;H7C3F9;C9JTV5;G5E9J0	Actin-related protein 2/3 complex subunit 2	O15144	ARPC2	20.0144	20.3325	21.2688	19.0585	21.1956	20.8265	21.7712	20.7916	20.9274			0.0830969	0.825854	0.178354	1.13159
P56192;F5H2V6;H0YIP0;F8VS26;F8W0M7;F8W0S4;F8VZZ9;H0YI94;H0YIC2;F8VPL7;H0YHL6;H0YI27;H0YHV5	Methionine--tRNA ligase, cytoplasmic	P56192	MARS	22.5817	22.8486	23.5182	22.9322	22.7791	22.7017	23.5018	23.3901	23.6766			0.246263	0.567201	0.178513	1.13172
P15924	Desmoplakin	P15924	DSP	27.366	27.797	26.7757	27.0901	27.5725	26.7401	26.931	27.8621	25.3058			0.177638	0.664297	0.178652	1.13183
Q9H9B4;D6RFI0;D6RDG7;S4R2X2;D6RAE9	Sideroflexin-1	Q9H9B4;D6RFI0;D6RDG7;S4R2X2	SFXN1	23.8352	24.2512	24.1445	24.1811	23.5532	23.9482	24.4777	24.5518	24.5558			0.341059	0.455975	0.182786	1.13507
E9PR30;P62861	40S ribosomal protein S30	E9PR30;P62861	FAU	24.2912	24.0636	23.2996	23.8964	23.5318	23.6704	23.6231	23.8562	23.785			0.227948	0.591632	0.185243	1.13701
Q08257;A6NP24;C9JH92	Quinone oxidoreductase	Q08257;A6NP24;C9JH92	CRYZ	21.09	21.2688	20.9661	21.136	20.6693	20.963	21.0817	21.2536	21.334			0.500039	0.3162	0.185544	1.13725
I3L3P7;P62244;I3L246;H3BVC7;H3BV27;H3BT37;I3L303	40S ribosomal protein S15a	I3L3P7;P62244;I3L246	RPS15A	24.2081	24.5311	24.3888	24.6453	23.5819	24.341	25.0803	24.6584	24.965			0.220628	0.60169	0.186598	1.13808
O75534;E9PLT0;E9PLD4;E9PKN4;E9PNG3	Cold shock domain-containing protein E1	O75534;E9PLT0	CSDE1	25.2641	25.4481	25.3368	24.974	25.3271	25.1881	23.6808	23.8904	24.1724			0.739125	0.182337	0.186634	1.13811
Q5T5C7;P49591	Serine--tRNA ligase, cytoplasmic	Q5T5C7;P49591	SARS	21.1553	20.8614	20.7963	19.8716	21.722	20.6588	20.6461	21.2554	21.0471			0.124954	0.749974	0.186886	1.1383
Q13200;H7C1H2;H7C2Q3;C9JPC0;F8WBS8	26S proteasome non-ATPase regulatory subunit 2	Q13200	PSMD2	21.4698	22.4823	22.7043	22.5285	21.4433	22.1214	23.0988	23.1549	22.9475			0.140535	0.723545	0.1877	1.13895
P40227;Q92526;J3KRI6	T-complex protein 1 subunit zeta	P40227	CCT6A	25.5798	25.4508	26.1069	25.6221	25.3828	25.568	26.1508	25.8445	26.2232			0.36897	0.427592	0.188177	1.13932
P40926;G3XAL0	Malate dehydrogenase, mitochondrial;Malate dehydrogenase	P40926;G3XAL0	MDH2	26.2922	26.5774	26.7374	26.5003	26.1317	26.4059	26.6751	26.6697	26.7015			0.482835	0.328977	0.189701	1.14053
A0A0A0MRM9;Q14978;S4R349	Nucleolar and coiled-body phosphoprotein 1	A0A0A0MRM9;Q14978	NOLC1	20.7476	21.3342	20.7775	20.4793	20.8105	20.9967	20.5867	21.3386	20.9623			0.321793	0.476658	0.190971	1.14153
E7ESV4;F5H7Y6;P61224;F5H6R7;F5H004;F5GX62;F5H4H0;F5GYH7;F5H077;F5GWU8;F5H491;F5H0B7;F5H500;A0A075B6Q0;F5GYB5;A0A0J9YXB3;A6NIZ1;P62834;F8WBC0;F5H823;B7ZB78;F5GZG1	Ras-related protein Rap-1b;Ras-related protein Rap-1b-like protein;Ras-related protein Rap-1A	E7ESV4;F5H7Y6;P61224;F5H6R7;F5H004;F5GX62;F5H4H0;F5GYH7;F5H077;F5GWU8;F5H491;F5H0B7;F5H500;A0A075B6Q0;F5GYB5;A0A0J9YXB3;A6NIZ1;P62834	RAP1B;RAP1A	22.801	22.8202	23.6441	22.9344	22.7647	22.9915	23.1321	23.4539	23.1679			0.267728	0.539849	0.191541	1.14198
P61088;F8VZ29;F8VSD4;F8VV71;Q5JXB2;F8VQQ8	Ubiquitin-conjugating enzyme E2 N;Putative ubiquitin-conjugating enzyme E2 N-like	P61088;F8VZ29;F8VSD4;F8VV71;Q5JXB2	UBE2N;UBE2NL	21.8412	21.5577	22.259	21.8197	21.1851	22.0768	21.8078	22.1222	22.5358			0.22458	0.596238	0.1921	1.14243
F8W6I7;P09651;F8VTQ5;Q32P51;F8VZ49;F8W646;H0YH80;F8VYN5	Heterogeneous nuclear ribonucleoprotein A1;Heterogeneous nuclear ribonucleoprotein A1, N-terminally processed;Heterogeneous nuclear ribonucleoprotein A1-like 2	F8W6I7;P09651;F8VTQ5;Q32P51;F8VZ49;F8W646	HNRNPA1;HNRNPA1L2	25.8988	26.2701	26.0886	25.7855	25.9415	25.9529	25.7584	25.6691	25.8345			0.735296	0.183952	0.192498	1.14274
Q9Y617	Phosphoserine aminotransferase	Q9Y617	PSAT1	22.0458	21.1248	22.179	22.1647	21.1641	21.4434	21.7521	22.2355	21.9299			0.162346	0.688104	0.192509	1.14275
O00299	Chloride intracellular channel protein 1	O00299	CLIC1	24.274	24.2914	25.1776	24.8184	24.0189	24.3244	24.9696	24.8534	24.8912			0.196807	0.635613	0.193806	1.14378
P06733;K7EM90;E5RI09;E5RG95;K7EPM1;K7EKN2;E5RGZ4;P13929;F5H1C3	Alpha-enolase	P06733	ENO1	27.8014	28.0132	28.3721	28.1222	27.5182	27.9612	28.5785	28.453	28.5309			0.326394	0.471635	0.195059	1.14477
Q13835;A0A087WYY6	Plakophilin-1	Q13835;A0A087WYY6	PKP1	24.0999	26.2526	23.4945	24.67	24.7075	23.8827	24.2103	24.7241	22.3661			0.0784053	0.834824	0.195588	1.14519
P15880;H0YEN5;E9PQD7;E9PMM9;I3L404;E9PM36;E9PPT0	40S ribosomal protein S2	P15880;H0YEN5;E9PQD7;E9PMM9	RPS2	25.1605	25.7659	25.97	25.5683	25.1851	25.5557	25.9684	25.8761	26.068			0.289088	0.513939	0.19573	1.1453
J3KNL2;Q8WYJ6	Septin-1	J3KNL2;Q8WYJ6	2017-09-01	24.6886	25.1729	25.0089	24.5859	24.963	24.7343	24.9338	24.9946	25.0639			0.472379	0.336993	0.195742	1.14531
Q01813;B1APP6;B1APP8;H0Y757;H0Y3Y3;V9GYV7;V9GY25;Q5VSR5	ATP-dependent 6-phosphofructokinase, platelet type	Q01813;B1APP6	PFKP	23.5108	23.6596	23.7323	23.6121	23.1239	23.5771	24.0513	23.9534	24.2078			0.504974	0.312627	0.196499	1.14591
Q13263;M0R0K9;M0R3C0	Transcription intermediary factor 1-beta	Q13263;M0R0K9	TRIM28	23.6867	24.0517	24.5888	24.2375	23.5784	23.9143	24.2883	24.3767	24.6099			0.242501	0.572136	0.19896	1.14787
P31689	DnaJ homolog subfamily A member 1	P31689	DNAJA1	23.8759	24.1609	23.7877	24.0906	23.22	23.917	24.2698	24.0806	24.306			0.276682	0.528833	0.198977	1.14788
P37268;E9PNM1;E9PJG4;E9PS69	Squalene synthase	P37268;E9PNM1	FDFT1	22.9929	22.3977	23.3092	22.7538	22.9247	22.4238	23.1503	23.0235	23.1838			0.260208	0.549278	0.199204	1.14806
P07954	Fumarate hydratase, mitochondrial	P07954	FH	23.8714	23.9914	23.8798	23.8567	23.3603	23.9153	24.2202	23.9831	24.171			0.491835	0.322229	0.203433	1.15144
P42285;H0YAC4;H0Y8U3	Superkiller viralicidic activity 2-like 2	P42285	SKIV2L2	21.2822	21.7798	21.211	20.9154	21.2951	21.4485	21.9191	21.7904	22.0149			0.356438	0.44011	0.20465	1.15241
G3V1D3;G3V180;Q9NY33;E9PQ14;E9PNX5;E9PPK9;E9PKK8	Dipeptidyl peptidase 3	G3V1D3;G3V180;Q9NY33;E9PQ14;E9PNX5;E9PPK9	DPP3	21.7046	22.4094	22.6417	22.488	21.5945	22.0581	22.615	22.8066	22.6088			0.207683	0.619893	0.205067	1.15274
P14625;Q96GW1;H0YIV0;Q58FF3;F8W026	Endoplasmin	P14625	HSP90B1	25.7787	25.675	26.8427	25.9955	25.7198	25.9658	26.4315	26.6479	26.446			0.206961	0.620924	0.20508	1.15275
Q8NC51	Plasminogen activator inhibitor 1 RNA-binding protein	Q8NC51	SERBP1	23.9774	23.9023	23.6907	23.3112	23.6385	24.0052	23.7708	23.9269	23.9479			0.397887	0.400049	0.205157	1.15281
P11586;F5H2F4;V9GYY3	C-1-tetrahydrofolate synthase, cytoplasmic;Methylenetetrahydrofolate dehydrogenase;Methenyltetrahydrofolate cyclohydrolase;Formyltetrahydrofolate synthetase;C-1-tetrahydrofolate synthase, cytoplasmic, N-terminally processed	P11586;F5H2F4	MTHFD1	25.3548	25.1812	25.2196	25.0296	24.8181	25.2901	25.7292	25.7044	25.7966			0.634553	0.231978	0.205943	1.15344
Q00534;F8VXD2;F8VYH9;F8VZZ0;F8VTV8;F8VWX7;F8VZ51;H0YAZ9;Q9BVE2;E7EUK8;E5RGN0;A0A087X209;A0A087WZU2;F5H6Z0;J3QSD7;P11802;Q96Q40;O94921;Q07002;Q00536;Q00537;Q9NYV4;Q14004	Cyclin-dependent kinase 6	Q00534	CDK6	24.0993	24.2007	24.4298	24.2662	23.5841	24.2605	24.2603	24.5285	24.5216			0.346937	0.449845	0.206359	1.15377
G3V295;G3V5Z7;P60900;G3V3I1;G3V3U4;G3V4S5;G3V2S7	Proteasome subunit alpha type;Proteasome subunit alpha type-6	G3V295;G3V5Z7;P60900;G3V3I1;G3V3U4	PSMA6	23.259	22.7239	23.995	22.809	23.4278	23.1193	22.9575	23.2219	23.0585			0.194231	0.639394	0.207248	1.15448
P61160;F5H6T1	Actin-related protein 2	P61160;F5H6T1	ACTR2	22.9316	22.4405	23.0716	22.7803	22.3862	22.6525	22.834	23.2644	23.2029			0.392764	0.404795	0.208248	1.15528
P52209;K7EM49;K7EMN2;K7EPF6	6-phosphogluconate dehydrogenase, decarboxylating	P52209;K7EM49;K7EMN2;K7EPF6	PGD	24.5247	24.5063	24.2928	24.1867	24.0849	24.4271	24.7281	24.7949	25.0033			0.761669	0.173114	0.208359	1.15537
F5GZS6;J3KPF3;P08195;H0YFS2;F5H0E2;F5H867;F5GZI0;F5GZR9;H0YFX4	4F2 cell-surface antigen heavy chain	F5GZS6;J3KPF3;P08195;H0YFS2	SLC3A2	22.8867	23.6219	23.6573	24.129	22.4122	22.9864	24.2991	24.0835	24.3056			0.139657	0.725008	0.212748	1.15889
Q969X5;F2Z3Q5;F2Z2U2	Endoplasmic reticulum-Golgi intermediate compartment protein 1	Q969X5	ERGIC1	20.7342	21.6163	22.2684	21.4518	21.2064	21.3218	22.154	22.3412	22.2558			0.179913	0.660825	0.212955	1.15906
J3KR24;P41252;A0A0A0MSX9;Q5TCC6;Q5TCD1	Isoleucine--tRNA ligase, cytoplasmic	J3KR24;P41252;A0A0A0MSX9	IARS	23.1212	23.297	23.6294	23.4843	22.7834	23.1384	23.7349	23.9196	23.9314			0.353835	0.442756	0.213842	1.15977
O95831;E9PMA0	Apoptosis-inducing factor 1, mitochondrial	O95831	AIFM1	22.4202	22.8656	23.0076	22.5808	22.3713	22.6961	23.2558	23.2945	23.2577			0.462624	0.344648	0.215051	1.16074
M0R208;Q16740;M0QYV5	ATP-dependent Clp protease proteolytic subunit;ATP-dependent Clp protease proteolytic subunit, mitochondrial	M0R208;Q16740	CLPP	21.8883	22.326	22.1252	21.7987	21.8982	21.9924	21.3421	21.884	21.9277			0.716316	0.192169	0.216735	1.1621
Q8WUH6	Transmembrane protein 263	Q8WUH6	TMEM263	24.8952	24.3503	22.7125	23.0792	24.4284	23.7939	23.2711	23.8314	23.3027			0.103208	0.788483	0.218835	1.16379
P61011;G3V4F7;G3V346;A0A0D9SFN7;G3V3L9;G3V480	Signal recognition particle 54 kDa protein	P61011;G3V4F7	SRP54	20.452	20.004	20.7813	19.4163	20.4719	20.6921	21.2295	20.7931	21.5264			0.184095	0.654494	0.21899	1.16392
P52597	Heterogeneous nuclear ribonucleoprotein F;Heterogeneous nuclear ribonucleoprotein F, N-terminally processed	P52597	HNRNPF	24.4144	24.2213	24.5662	24.0683	24.3638	24.1078	23.7719	23.652	23.9922			0.743653	0.180446	0.220652	1.16526
P39019;M0R2L9;M0QXK4;M0QYF7;M0R140;A0A075B6E2	40S ribosomal protein S19	P39019;M0R2L9;M0QXK4;M0QYF7;M0R140	RPS19	22.9693	22.9537	23.2547	23.3406	22.1682	23.0061	23.3865	23.3628	23.2521			0.240524	0.574746	0.220954	1.1655
E9PE17;I3L0E3;Q9Y2R5	28S ribosomal protein S17, mitochondrial	E9PE17;I3L0E3;Q9Y2R5	MRPS17;hCG_1984214	19.9304	22.6915	20.9581	21.5415	20.492	20.8827	19.6356	20.055	19.9982			0.091495	0.810037	0.221301	1.16578
P31946;Q4VY20;Q4VY19;A0A0J9YWE8;A0A0J9YWZ2	14-3-3 protein beta/alpha;14-3-3 protein beta/alpha, N-terminally processed	P31946	YWHAB	21.3733	21.7756	23.532	21.4034	22.9899	21.6224	22.7859	21.9273	22.3405			0.0957686	0.802105	0.221736	1.16614
A0A087X2B5;P35613;A0A087WUV8;I3L192;R4GMX5;R4GN83	Basigin	A0A087X2B5;P35613;A0A087WUV8;I3L192;R4GMX5	BSG	21.4988	21.32	22.7289	21.9804	21.3317	21.5597	22.2414	22.6405	22.3253			0.177527	0.664467	0.225288	1.16901
P08238;Q58FF7	Heat shock protein HSP 90-beta	P08238	HSP90AB1	28.5702	28.9171	29.6721	29.0412	28.6369	28.804	29.5927	29.5986	29.6054			0.260038	0.549493	0.225751	1.16939
Q9Y3I0	tRNA-splicing ligase RtcB homolog	Q9Y3I0	RTCB	22.8937	22.9851	23.2545	22.4644	23.0351	22.9563	23.0722	23.0265	23.2436			0.467913	0.340476	0.225791	1.16942
P33993;C9J8M6	DNA replication licensing factor MCM7	P33993	MCM7	24.6721	24.8896	25.0056	24.6018	24.2636	25.0216	25.3685	25.3355	25.4792			0.399767	0.398321	0.226773	1.17021
P62913;Q5VVC8;Q5VVC9	60S ribosomal protein L11	P62913;Q5VVC8	RPL11	25.5689	25.831	26.1885	25.7063	25.5499	25.646	26.2105	26.0051	26.1577			0.545989	0.284453	0.228773	1.17184
G3V203;H0YHA7;J3QQ67;Q07020;F8VUA6;F8VYV2;A0A075B7A0	60S ribosomal protein L18	G3V203;H0YHA7;J3QQ67;Q07020;F8VUA6;F8VYV2;A0A075B7A0	RPL18	26.6371	26.4956	26.5855	26.1122	26.1626	26.7553	26.5759	26.8399	26.9054			0.472013	0.337277	0.229381	1.17233
P30086	Phosphatidylethanolamine-binding protein 1;Hippocampal cholinergic neurostimulating peptide	P30086	PEBP1	22.8677	22.9554	23.7185	22.9487	23.5255	22.3749	22.659	23.1151	22.8788			0.208691	0.618456	0.230793	1.17348
P62277;J3KMX5;E9PS50	40S ribosomal protein S13	P62277;J3KMX5	RPS13	24.4739	23.8928	25.1714	24.0119	24.2723	24.545	25.0926	24.8361	24.5404			0.231521	0.586786	0.236295	1.17796
F8WAE5;Q9BY44;C9IZE1;F8WF18;F8WAT3;H7C5Q3;H7C5R5	Eukaryotic translation initiation factor 2A;Eukaryotic translation initiation factor 2A, N-terminally processed	F8WAE5;Q9BY44;C9IZE1	EIF2A	22.1165	22.7712	22.152	21.693	22.3127	22.3232	22.3601	22.2948	22.4656			0.327305	0.470647	0.23689	1.17845
A0A0A0MRN7;Q6YP21;A0A0A0MRN6	Kynurenine--oxoglutarate transaminase 3	A0A0A0MRN7;Q6YP21;A0A0A0MRN6	CCBL2	21.0077	21.1371	20.7841	20.6493	20.7955	20.7637	20.9921	20.9306	20.8776			1.0033	0.099243	0.240119	1.18109
O75489;E9PS48	NADH dehydrogenase [ubiquinone] iron-sulfur protein 3, mitochondrial	O75489	NDUFS3	21.3677	21.9086	21.4129	21.6571	21.2699	21.041	21.2878	21.2288	21.0856			0.408733	0.390182	0.24039	1.18131
P09972;K7EKH5;J3KSV6;J3QKP5;A8MVZ9;C9J8F3	Fructose-bisphosphate aldolase C;Fructose-bisphosphate aldolase	P09972;K7EKH5;J3KSV6;J3QKP5;A8MVZ9	ALDOC	24.4773	24.4375	24.8	24.7916	23.9875	24.2134	24.9937	24.8814	24.7087			0.381105	0.41581	0.240758	1.18161
E7ETK0;A0A087WUS0;P62847	40S ribosomal protein S24	E7ETK0;A0A087WUS0;P62847	RPS24	24.3798	24.6552	23.4791	24.0656	23.7369	23.9891	24.461	24.8353	24.3733			0.260196	0.549293	0.240866	1.1817
H0YNE9;Q92930;H0YMN7;H0YLJ8;H0YL94;P51153;M0R257;P20337;O95716;P20336;Q96E17	Ras-related protein Rab-8B	H0YNE9;Q92930;H0YMN7	RAB8B	20.3628	21.1315	20.8496	21.2674	21.0534	19.2933	21.4694	21.4165	21.4325			0.134977	0.732864	0.24324	1.18365
O76003	Glutaredoxin-3	O76003	GLRX3	20.3042	21.3029	22.327	21.3645	20.9709	20.8677	22.0142	21.8037	21.9267			0.150615	0.706944	0.24365	1.18398
Q32Q12;P22392;O60361;J3KPD9;E7ERL0;P15531;F6XY72;C9K028;E5RHP0	Nucleoside diphosphate kinase;Nucleoside diphosphate kinase B;Putative nucleoside diphosphate kinase;Nucleoside diphosphate kinase A	Q32Q12;P22392;O60361;J3KPD9;E7ERL0;P15531	NME1-NME2;NME2;NME2P1;NME1	24.2881	24.1905	24.9779	24.3756	24.111	24.2385	24.5561	24.6078	24.5886			0.397516	0.400391	0.243786	1.1841
O94776	Metastasis-associated protein MTA2	O94776	MTA2	22.1157	21.9485	22.8172	22.0182	21.8116	22.3199	23.0139	23.2409	23.2704			0.329975	0.467762	0.243893	1.18418
P36578;H3BM89;H3BTP7;H3BU31	60S ribosomal protein L4	P36578;H3BM89	RPL4	25.4164	25.2571	25.5427	25.3498	25.0764	25.0578	25.7278	25.6006	25.7085			0.90787	0.123632	0.244061	1.18432
Q9NYU2;H7BZG0	UDP-glucose:glycoprotein glucosyltransferase 1	Q9NYU2	UGGT1	23.6281	23.137	23.5408	23.3215	22.9094	23.3414	24.1681	24.0682	24.1299			0.519746	0.302172	0.24456	1.18473
Q00325;F8VVM2;F8VZL5;F8VWR4;F8VWQ0	Phosphate carrier protein, mitochondrial	Q00325;F8VVM2	SLC25A3	25.8237	24.6352	25.679	25.1201	25.1226	25.1612	26.0607	25.8105	25.8315			0.260174	0.549321	0.244665	1.18482
Q02790;H0YFG2;F5H1U3;F5H120	Peptidyl-prolyl cis-trans isomerase FKBP4;Peptidyl-prolyl cis-trans isomerase FKBP4, N-terminally processed	Q02790	FKBP4	22.7321	22.5912	23.6558	22.5551	22.5138	23.1739	23.1595	23.3205	23.2833			0.24476	0.569167	0.245471	1.18548
P62258;B4DJF2;I3L3T1;K7EM20;K7EIT4;I3L0W5	14-3-3 protein epsilon	P62258	YWHAE	24.0758	24.1137	24.902	24.2975	23.9285	24.1245	24.0757	24.6163	24.1605			0.354721	0.441854	0.246977	1.18672
P00390;H0YC68;E5RI06	Glutathione reductase, mitochondrial	P00390	GSR	20.9739	21.121	20.9062	20.5769	20.5609	21.1194	21.2195	21.7095	21.3473			0.567279	0.270845	0.247908	1.18748
Q13561;F8W1I6;F8VW18;H0YHL1;F8VRV7;H0YI98;F8W0U6;F8VX93	Dynactin subunit 2	Q13561;F8W1I6;F8VW18	DCTN2	20.235	19.7201	21.0929	19.9419	19.8666	20.4844	20.3041	20.2978	19.8998			0.220392	0.602015	0.251696	1.19061
P62249;M0R210;A0A087WZ27;M0R3H0;Q6IPX4;M0R1M5;M0QX76	40S ribosomal protein S16	P62249;M0R210;A0A087WZ27;M0R3H0;Q6IPX4	RPS16;ZNF90	24.696	25.0534	25.3522	24.9537	24.4435	24.9448	25.9141	25.5639	25.5498			0.426056	0.374924	0.253164	1.19182
Q9Y5M8;H7C4H2	Signal recognition particle receptor subunit beta	Q9Y5M8;H7C4H2	SRPRB	21.8611	21.9815	21.5942	21.6468	21.2336	21.7969	22.2141	22.7668	22.46			0.550273	0.281661	0.253165	1.19182
Q04917;A2IDB2;F8WEB6;A2IDB1	14-3-3 protein eta	Q04917	YWHAH	20.5881	19.9923	23.0383	21.1597	20.9146	20.7786	21.8788	21.2694	21.4593			0.0973791	0.799136	0.255252	1.19354
Q5TEC6	Histone H3	Q5TEC6	HIST2H3PS2	25.7485	26.1545	25.6588	25.9913	25.368	25.4366	26.0913	25.9097	26.1068			0.439056	0.363869	0.255273	1.19356
P49588;H3BPK7	Alanine--tRNA ligase, cytoplasmic	P49588	AARS	23.0968	22.4954	23.2703	22.7067	22.5441	22.8439	23.512	23.4326	23.3226			0.438553	0.36429	0.255941	1.19411
P07237;H7BZ94;H0Y3Z3;I3L0S0;I3NI03;I3L398;I3L3U6;I3L312;I3L4M2;I3L514;I3L3P5;I3L1Y5	Protein disulfide-isomerase	P07237;H7BZ94;H0Y3Z3	P4HB	24.3344	24.0774	25.4081	24.2753	24.3691	24.4019	24.6073	24.752	24.6387			0.249599	0.562861	0.257881	1.19572
P10809;E7ESH4;E7EXB4;C9JL25;C9JCQ4;C9JL19;C9J0S9	60 kDa heat shock protein, mitochondrial	P10809	HSPD1	29.664	29.7354	29.7411	29.6171	29.2241	29.5244	29.9481	29.812	29.9847			0.999811	0.100043	0.258279	1.19605
I3L0N3;P46459	Vesicle-fusing ATPase	I3L0N3;P46459	NSF	21.4611	21.9367	22.1195	21.925	21.2333	21.5772	22.3058	22.249	22.7365			0.39294	0.404632	0.260588	1.19797
M0R0Y2;P54920;M0R2M1;M0R213;M0R027;M0QZM9;M0QZN5;M0R031;M0R058;A0A087WZQ7;Q9H115;M0R0I4	Alpha-soluble NSF attachment protein	M0R0Y2;P54920;M0R2M1	NAPA	20.7722	21.3489	22.1898	21.6083	19.786	22.1321	22.0441	22.215	21.7138			0.115654	0.766207	0.261468	1.1987
Q9UQ80;F8VR77;F8W0A3;H0YIN7;F8VZ69	Proliferation-associated protein 2G4	Q9UQ80;F8VR77	PA2G4	23.9403	23.962	24.482	23.9286	23.9048	23.7602	24.5078	24.5209	24.4128			0.644361	0.226798	0.263572	1.20045
P01116;P01111;G3V4K2;G3V5T7;RASH_HUMAN;P01112	GTPase KRas;GTPase KRas, N-terminally processed;GTPase NRas;GTPase HRas;GTPase HRas, N-terminally processed	P01116;P01111;G3V4K2;G3V5T7;RASH_HUMAN;P01112	KRAS;NRAS;HRAS	20.231	19.4662	20.8746	19.7837	19.8189	20.1755	19.4282	20.7599	21.5253			0.245601	0.568067	0.264592	1.2013
P60174;U3KPZ0;U3KQF3;U3KPS5	Triosephosphate isomerase	P60174	TPI1	23.5015	23.7165	24.7291	23.7927	23.3363	24.0215	23.8648	23.9537	23.7636			0.244706	0.569239	0.265509	1.20206
A0A087WXM6;J3QQT2;J3KRX5;A0A0A6YYL6;P18621;J3QLC8;A0A0A0MRF8;J3KRB3;A0A087WWH0;J3QS96;J3KSJ0;A0A087WY81	60S ribosomal protein L17	A0A087WXM6;J3QQT2;J3KRX5;A0A0A6YYL6;P18621;J3QLC8;A0A0A0MRF8;J3KRB3;A0A087WWH0;J3QS96	RPL17;RPL17-C18orf32	24.9177	24.369	24.7705	24.0498	24.6305	24.5786	24.9281	25.1061	24.8728			0.464632	0.343058	0.266057	1.20252
P26641	Elongation factor 1-gamma	P26641	EEF1G	25.9601	26.0034	26.4935	26.1097	25.6595	25.8879	26.2882	26.1705	26.4528			0.54929	0.2823	0.266647	1.20301
A8K878;P55145;H7C2D6	Mesencephalic astrocyte-derived neurotrophic factor	A8K878;P55145	MANF	21.6465	21.4454	22.6163	22.0445	21.1251	21.7327	22.0757	22.5161	22.1818			0.233885	0.583599	0.268635	1.20467
P31040;A0A087X1I3;D6RFM5	Succinate dehydrogenase [ubiquinone] flavoprotein subunit, mitochondrial	P31040;A0A087X1I3;D6RFM5	SDHA	23.1604	23.575	23.0207	22.9803	22.8035	23.1659	22.7756	23.0591	23.0258			0.613815	0.243324	0.268787	1.20479
Q9UIG0	Tyrosine-protein kinase BAZ1B	Q9UIG0	BAZ1B	21.0861	21.0939	20.7309	20.8444	20.7659	20.4906	20.7502	20.6135	21.2131			0.773834	0.168332	0.270007	1.20581
Q9P2J5	Leucine--tRNA ligase, cytoplasmic	Q9P2J5	LARS	23.1432	22.9751	23.1186	22.9367	22.4306	23.0586	23.6539	23.7992	23.8338			0.608113	0.24654	0.270269	1.20603
P62269;A0A0G2JQH2;Q5GGW2;J3JS69	40S ribosomal protein S18	P62269	RPS18	23.6543	24.335	25.0363	24.1416	23.9741	24.0951	24.8432	24.8769	24.8276			0.270483	0.536435	0.27158	1.20713
P31939;C9JLK0;H7C1S2;F8WEF0	Bifunctional purine biosynthesis protein PURH;Phosphoribosylaminoimidazolecarboxamide formyltransferase;IMP cyclohydrolase	P31939	ATIC	24.8353	24.8759	25.2998	24.9338	24.5853	24.6749	25.275	25.3391	25.4067			0.681815	0.208058	0.27238	1.2078
Q14318;U3KQ64;A0A0A0MTJ1;U3KQI1;M0R2K9	Peptidyl-prolyl cis-trans isomerase FKBP8	Q14318;U3KQ64;A0A0A0MTJ1	FKBP8	21.6044	21.8767	23.0261	22.348	21.3258	22.0144	22.4786	22.3463	22.6516			0.198334	0.633382	0.272977	1.2083
P49458;E9PE20	Signal recognition particle 9 kDa protein	P49458;E9PE20	SRP9	21.8378	22.3077	22.66	22.204	21.8607	21.9185	22.0647	22.3189	22.3549			0.452843	0.352498	0.274064	1.20921
Q15181;Q5SQT6	Inorganic pyrophosphatase	Q15181;Q5SQT6	PPA1	21.6226	22.0961	22.4913	22.4041	20.7925	22.1879	21.8332	22.4473	22.2859			0.186288	0.651197	0.275155	1.21012
D3DSM0;P05107;A0A087WX36;J3KNI6;E5RHT0;E5RFI0;E5RIE4;A8MVG7;E5RIG7;E5RK25;E7EVZ9	Integrin beta;Integrin beta-2	D3DSM0;P05107;A0A087WX36	ITGB2	23.2528	23.3083	23.7686	23.4099	22.6869	23.3986	24.0911	23.9597	23.8968			0.407359	0.391418	0.278076	1.21258
P33991;E5RFJ8;E5RG31;E5RFR3;Q9UJA3	DNA replication licensing factor MCM4	P33991	MCM4	23.942	23.8694	24.1637	23.9407	23.3198	23.8801	24.4937	24.553	24.4064			0.571298	0.26835	0.278165	1.21265
M0QZR4;Q92888;M0QYC1;M0QYS3;M0R3H5;M0QZH8;M0R2C7	Rho guanine nucleotide exchange factor 1	M0QZR4;Q92888	ARHGEF1	21.1023	20.7719	21.2381	20.8706	21.5654	19.8382	21.2778	21.2252	21.0711			0.207655	0.619934	0.279366	1.21366
K7EN82;B7Z8J4;P30419	Glycylpeptide N-tetradecanoyltransferase 1	K7EN82;B7Z8J4;P30419	NMT1	21.0147	21.2167	21.2849	21.0807	20.6956	20.8998	19.9319	21.3713	21.333			0.952197	0.111636	0.280093	1.21427
Q15056	Eukaryotic translation initiation factor 4H	Q15056	EIF4H	20.7999	21.4518	22.515	21.3217	21.0245	21.5752	21.3571	21.6943	21.7997			0.207861	0.61964	0.281766	1.21568
P15153;B1AH77;B1AH80;B1AH78;J3KSC4;J3QLK0	Ras-related C3 botulinum toxin substrate 2	P15153;B1AH77;B1AH80;B1AH78	RAC2	25.576	25.0275	25.9976	25.2278	25.1675	25.3593	25.5726	25.6957	25.5849			0.419708	0.380445	0.282163	1.21602
F5GYL3;G3V529;Q9GZR7;A0A087WXU8	ATP-dependent RNA helicase DDX24	F5GYL3;G3V529;Q9GZR7;A0A087WXU8	DDX24	21.5383	21.9093	20.9611	21.1755	21.2729	21.111	21.3886	21.8807	21.4911			0.433013	0.368967	0.283101	1.21681
Q86UE4;E5RJU9;H0YBJ8;H0YB56	Protein LYRIC	Q86UE4;E5RJU9	MTDH	23.6536	23.6454	22.7098	23.0075	22.9585	23.1933	23.5745	23.5736	23.7406			0.368622	0.427935	0.283162	1.21686
P06576;H0YH81;F8W079;F8W0P7;H0YI37	ATP synthase subunit beta, mitochondrial;ATP synthase subunit beta	P06576;H0YH81;F8W079	ATP5B	27.2738	27.6712	27.5901	27.6205	26.96	27.1029	27.4281	27.2965	27.467			0.533893	0.292488	0.283887	1.21747
P26639;D6R9F8;D6RCA5;D6RDJ6	Threonine--tRNA ligase, cytoplasmic	P26639	TARS	21.6853	22.4826	22.6682	22.178	21.7425	22.0553	22.7723	22.8501	22.805			0.364983	0.431536	0.286777	1.21991
P04585		P04585		29.846	29.8131	29.5307	29.1049	29.6683	29.555	27.107	26.9922	26.9285			0.652788	0.22244	0.287212	1.22028
P61158;B4DXW1;F8WEW2;F8WE84;F8WDR7	Actin-related protein 3	P61158;B4DXW1	ACTR3	22.7275	23.125	23.2912	23.0793	22.3617	22.8364	23.3465	23.5074	23.7801			0.464036	0.343529	0.288787	1.22161
A0A0C4DGG8;Q8IX12;F5H3E1;F5H1H2;F5H2E6	Cell division cycle and apoptosis regulator protein 1	A0A0C4DGG8;Q8IX12;F5H3E1;F5H1H2;F5H2E6	CCAR1	20.6727	20.4632	20.3264	20.3811	20.8251	19.3868	20.7627	20.7783	20.9508			0.264791	0.543511	0.289768	1.22244
J3KSI4;I3L1D2;I3L4E0;J3QS48;I3L295;J3KT75;J3QW43;J3QRD5;Q9H3L2;Q1HDL3;A0A087WV81;O75352;I3L405;I3L261;J3KTK8;J3QQZ4	Mannose-P-dolichol utilization defect 1 protein	J3KSI4;I3L1D2;I3L4E0;J3QS48;I3L295;J3KT75;J3QW43;J3QRD5;Q9H3L2;Q1HDL3;A0A087WV81;O75352;I3L405;I3L261;J3KTK8;J3QQZ4	MPDU1;HBEBP2BPA	21.5384	20.1286	20.5216	19.8346	20.3003	21.179	20.7812	20.7273	21.0548			0.194267	0.639341	0.291576	1.22398
P29350;F5H0N8;F5H1V7;F5H4Z1;F5GXD4;U3KQS1;F5H5H9;F5GY79;F5H1Z8	Tyrosine-protein phosphatase non-receptor type 6	P29350	PTPN6	21.7343	21.814	21.1951	21.3392	20.9474	21.5783	22.1856	21.9993	22.2936			0.474567	0.335299	0.292816	1.22503
A0A0J9YVR6;E9PQ56;A0A0J9YWM1;H0YEM1;A0A0J9YYL3;A0A0J9YXJ8;A0A0J9YVP6;A0A0J9YXX5;Q9UHX1;E9PMU7;E9PN18;H0YCP8;E9PL19	Poly(U)-binding-splicing factor PUF60	A0A0J9YVR6;E9PQ56;A0A0J9YWM1;H0YEM1;A0A0J9YYL3;A0A0J9YXJ8;A0A0J9YVP6;A0A0J9YXX5;Q9UHX1;E9PMU7;E9PN18;H0YCP8	PUF60	22.9469	22.7383	23.1559	22.9031	22.6293	22.4281	22.8436	23.2355	23.2352			0.735409	0.183904	0.293547	1.22565
P47914	60S ribosomal protein L29	P47914	RPL29	27.843	27.2116	26.9299	26.9891	27.2524	26.8614	25.5932	25.5849	25.6833			0.427879	0.373354	0.293865	1.22592
P49790	Nuclear pore complex protein Nup153	P49790	NUP153	21.2105	20.6531	20.9916	20.6966	20.0581	21.2067	21.4259	21.5208	21.3613			0.33202	0.465564	0.29788	1.22934
P00558;P07205	Phosphoglycerate kinase 1	P00558	PGK1	26.475	26.6195	27.3536	26.8896	26.1644	26.4982	27.0954	27.1515	27.2531			0.363006	0.433505	0.298667	1.23001
Q9H0A0;A0A087WV29;E9PMU0;E9PJN6	N-acetyltransferase 10	Q9H0A0;A0A087WV29	NAT10	22.6741	22.8893	22.3759	22.3818	22.1638	22.4773	22.8421	22.5449	22.7867			0.805312	0.156563	0.305433	1.23579
P11908;B1ALA9;P60891;B7ZB02;A6NMS2;B1ALA7;H7C540;D3YTJ7;A0A0B4J207;P21108	Ribose-phosphate pyrophosphokinase 2;Ribose-phosphate pyrophosphokinase 1	P11908;B1ALA9;P60891;B7ZB02	PRPS2;PRPS1	22.1889	21.796	22.1611	22.029	21.2849	21.9147	22.465	22.1281	22.1804			0.507658	0.310701	0.305793	1.2361
Q9H0U4;E9PLD0;Q92928;A0A087WTI1	Ras-related protein Rab-1B;Putative Ras-related protein Rab-1C	Q9H0U4;E9PLD0;Q92928	RAB1B;RAB1C	24.264	24.2949	24.5171	23.8839	24.0669	24.1998	24.687	24.7608	24.9798			1.19419	0.0639458	0.308462	1.23839
P49368;B4DUR8;Q5SZX6;E9PRC8;Q5SZX9;E9PQ35;Q5SZW8;E9PM09	T-complex protein 1 subunit gamma	P49368;B4DUR8	CCT3	24.9444	25.2128	25.8477	25.2717	24.7624	25.0141	25.8071	25.601	25.8347			0.449191	0.355475	0.318925	1.2474
F2Z393;P37837	Transaldolase	F2Z393;P37837	TALDO1	23.2925	23.2167	23.5416	23.2116	22.9021	22.9743	23.2989	23.5264	23.3831			1.11348	0.0770054	0.320892	1.2491
Q13011;M0R248;M0QZW4	Delta(3,5)-Delta(2,4)-dienoyl-CoA isomerase, mitochondrial	Q13011;M0R248	ECH1	23.4896	23.9568	24.0643	23.5889	23.2466	23.7019	23.7169	23.7223	23.96			0.65788	0.219847	0.324433	1.25217
Q9BVP2	Guanine nucleotide-binding protein-like 3	Q9BVP2	GNL3	21.4572	21.6273	20.7764	20.8717	20.9138	21.1012	21.0896	21.0093	21.197			0.530933	0.294487	0.324703	1.25241
Q5TDF0;Q9BSD7	Cancer-related nucleoside-triphosphatase	Q5TDF0;Q9BSD7	NTPCR	22.4132	22.9207	22.087	22.2622	21.9436	22.2385	22.2026	22.291	22.318			0.546752	0.283954	0.325574	1.25316
Q9NTJ5;E9PGZ4;C9JV50;F8WDN7;F8WCQ2;C9J3E3	Phosphatidylinositide phosphatase SAC1	Q9NTJ5;E9PGZ4	SACM1L	22.2418	21.1326	21.99	21.7188	21.0029	21.6659	22.4091	21.8946	22.1209			0.329173	0.468626	0.325622	1.2532
C9J6D1;Q99733;E9PNW0;E9PJJ2;E9PS34;E9PNJ7;A8MXH2;E9PKT8;C9JZI7;E9PKI2;E9PP22;C9J1B1;H0YCI4	Nucleosome assembly protein 1-like 4	C9J6D1;Q99733;E9PNW0;E9PJJ2;E9PS34;E9PNJ7;A8MXH2;E9PKT8;C9JZI7	NAP1L4	21.6183	21.3411	22.1396	21.5456	21.1084	21.4629	21.3336	20.6733	21.6483			0.535173	0.291626	0.327382	1.25473
P27695;G3V5Q1;G3V3M6;G3V5D9;A0A0C4DGK8;G3V3C7;G3V5M0;G3V359;H7C4A8;G3V3Y6	DNA-(apurinic or apyrimidinic site) lyase;DNA-(apurinic or apyrimidinic site) lyase, mitochondrial	P27695;G3V5Q1;G3V3M6;G3V5D9;A0A0C4DGK8;G3V3C7	APEX1	20.3877	21.6936	21.1345	20.194	21.5252	20.508	19.798	20.6129	20.5942			0.234685	0.582526	0.329549	1.25662
Q06323;H0YLU2;H0YKK6	Proteasome activator complex subunit 1	Q06323	PSME1	22.7305	22.3387	23.1973	22.7257	22.0668	22.4703	22.9575	23.0155	22.8611			0.460588	0.346268	0.334519	1.26096
P47755;C9JUG7;F8W9N7	F-actin-capping protein subunit alpha-2	P47755;C9JUG7;F8W9N7	CAPZA2	21.8171	22.0621	21.6189	21.9159	21.9245	20.6518	21.4484	21.3599	21.2356			0.309671	0.49015	0.335321	1.26166
O60234;M0QX47;M0QYG8;M0R1D2;M0R0C1;M0QYJ8;M0QXZ6;M0R2P2;M0QXC2;G3V4P8;P60983	Glia maturation factor gamma	O60234;M0QX47;M0QYG8;M0R1D2;M0R0C1;M0QYJ8	GMFG	22.8378	22.5541	23.2047	22.6211	22.2545	22.7133	22.3037	22.5706	22.5562			0.646493	0.225687	0.335883	1.26215
H7C2Q8;Q99848	Probable rRNA-processing protein EBP2	H7C2Q8;Q99848	EBNA1BP2	21.0672	21.068	20.8074	20.7555	20.1694	21.0082	20.2578	20.9602	20.8244			0.568464	0.270107	0.336514	1.2627
K7ELL7;P14314;A0A0C4DGP4;K7EPW7;K7EKX1;K7EJ70	Glucosidase 2 subunit beta	K7ELL7;P14314	PRKCSH	21.2728	21.4075	23.4104	22.0432	21.5441	21.4902	21.6831	21.9995	21.6436			0.180121	0.660509	0.337752	1.26379
P25705;K7EK77;K7ERX7;K7ENJ4;K7EJP1;K7EQH4;K7ESA0	ATP synthase subunit alpha, mitochondrial	P25705;K7EK77;K7ERX7	ATP5A1	28.0596	28.2549	28.1964	27.9971	27.5583	27.92	28.258	28.2169	28.2189			1.10319	0.0788507	0.34518	1.27031
Q96HY6;A0A0A0MRX2	DDRGK domain-containing protein 1	Q96HY6;A0A0A0MRX2	DDRGK1	20.9754	21.3056	21.6679	21.15	20.5028	21.259	22.2651	21.3004	22.1606			0.486307	0.326357	0.345694	1.27076
C9J2Y9;P30876;C9J4M6	DNA-directed RNA polymerase;DNA-directed RNA polymerase II subunit RPB2	C9J2Y9;P30876;C9J4M6	POLR2B	21.2999	21.7639	20.3089	20.81	20.7982	20.7269	21.104	21.5263	21.0982			0.331407	0.466222	0.345848	1.2709
Q08J23	tRNA (cytosine(34)-C(5))-methyltransferase	Q08J23	NSUN2	21.9232	22.7759	22.5448	22.1521	22.076	21.975	22.5774	22.5724	22.6232			0.597647	0.252554	0.346944	1.27186
B0I1T2;F8WEW9	Unconventional myosin-Ig;Minor histocompatibility antigen HA-2	B0I1T2	MYO1G	24.2743	24.5862	24.9329	24.4664	23.9713	24.3135	25.0706	25.093	25.1802			0.654978	0.221321	0.347383	1.27225
J3KN66;A0A0A0MSK5;Q5JTV8;H0YD16;H0Y4R4;H0YDU3	Torsin-1A-interacting protein 1	J3KN66;A0A0A0MSK5;Q5JTV8	TOR1AIP1	20.9109	21.3804	21.9496	21.0464	21.1397	21.005	21.5447	22.1343	22.3491			0.505372	0.31234	0.349937	1.27451
Q9NVJ2;Q96BM9	ADP-ribosylation factor-like protein 8B;ADP-ribosylation factor-like protein 8A	Q9NVJ2;Q96BM9	ARL8B;ARL8A	20.5657	20.7707	21.2876	20.27	20.4823	20.8187	22.4352	21.5247	21.3258			0.585186	0.259905	0.351032	1.27547
P62280;M0QZC5;M0R1H6;M0R1H5	40S ribosomal protein S11	P62280;M0QZC5	RPS11	25.5057	25.3314	26.0285	25.2188	25.0634	25.5206	25.9693	26.161	25.9462			0.642862	0.227582	0.354247	1.27832
P62266;D6RD47;D6RDJ2;D6RIX0;D6R9I7	40S ribosomal protein S23	P62266;D6RD47	RPS23	23.4555	23.233	24.2122	23.5496	22.9301	23.3527	24.0745	24.0416	23.8637			0.438611	0.364241	0.356092	1.27995
Q99615;K7ESP1;K7EIH8;K7EPP7;K7ELJ8;K7EJE9;K7EK03;K7EJL5;K7EN19;K7EJV7;K7ER44	DnaJ homolog subfamily C member 7	Q99615;K7ESP1;K7EIH8;K7EPP7	DNAJC7	21.5915	21.0298	21.3874	21.0212	20.9725	20.943	21.4876	21.6989	21.9023			1.01185	0.0973084	0.35735	1.28107
Q9NSD9	Phenylalanine--tRNA ligase beta subunit	Q9NSD9	FARSB	22.3535	22.85	23.1103	22.4881	21.7922	22.9409	23.2925	23.0026	23.4348			0.381687	0.415253	0.36419	1.28716
Q9Y6N5;H3BMS6;H3BNX3;H3BNP9;H3BV36	Sulfide:quinone oxidoreductase, mitochondrial	Q9Y6N5;H3BMS6;H3BNX3	SQRDL	23.1147	22.3767	22.5137	21.8696	22.51	22.5326	22.128	22.3783	22.5372			0.507901	0.310527	0.364284	1.28724
F8WJN3;Q16630	Cleavage and polyadenylation specificity factor subunit 6	F8WJN3;Q16630	CPSF6	20.6658	22.8153	21.7393	21.6624	20.7077	21.7508	20.1028	21.7475	21.7369			0.200374	0.630414	0.366532	1.28925
B9A041;P40925;B8ZZ51;C9JF79;C9JRL4	Malate dehydrogenase, cytoplasmic;Malate dehydrogenase	B9A041;P40925;B8ZZ51;C9JF79	MDH1	23.2309	23.3149	23.8984	22.7892	23.2185	23.335	23.5606	23.7071	23.9585			0.61632	0.241924	0.367157	1.28981
Q99878;Q96KK5;Q9BTM1;Q16777;Q6FI13;P0C0S8;A0A0U1RR32;A0A0U1RRH7;P20671;H0YFX9;Q96QV6	Histone H2A type 1-J;Histone H2A type 1-H;Histone H2A.J;Histone H2A type 2-C;Histone H2A type 2-A;Histone H2A type 1;Histone H2A type 1-D;Histone H2A;Histone H2A type 1-A	Q99878;Q96KK5;Q9BTM1;Q16777;Q6FI13;P0C0S8;A0A0U1RR32;A0A0U1RRH7;P20671;H0YFX9;Q96QV6	HIST1H2AJ;HIST1H2AH;H2AFJ;HIST2H2AC;HIST2H2AA3;HIST1H2AG;HIST1H2AD;HIST1H2AA	30.106	30.4586	30.0067	30.3855	28.9588	30.1244	30.3908	30.5044	30.2993			0.329219	0.468577	0.367549	1.29016
O60506;B7Z645;F6UXX1	Heterogeneous nuclear ribonucleoprotein Q	O60506;B7Z645	SYNCRIP	27.0861	27.4727	27.4118	26.5889	27.2038	27.0751	24.0615	24.0283	24.124			0.760174	0.17371	0.367565	1.29017
P62263;H0YB22;E5RH77	40S ribosomal protein S14	P62263;H0YB22;E5RH77	RPS14	25.5544	25.1633	25.5461	25.1219	24.9483	25.0874	24.8631	24.5687	25.0063			1.2413	0.0573722	0.368729	1.29121
P00367;DHE3_BOVIN;P49448	Glutamate dehydrogenase 1, mitochondrial;Glutamate dehydrogenase 2, mitochondrial	P00367;DHE3_BOVIN;P49448	GLUD1;GLUD2	24.2207	24.4712	24.7584	24.3839	23.9604	23.9967	24.3633	24.5823	24.548			0.831701	0.147333	0.369766	1.29214
P60866;E5RJX2;E5RIP1;G3XAN0	40S ribosomal protein S20	P60866;E5RJX2;E5RIP1	RPS20	23.5478	24.2604	25.0101	24.3145	23.3966	23.9931	24.5999	24.3272	24.5832			0.301614	0.499328	0.371373	1.29358
E9PIR7;F8W809;A0A087WSW9;A0A087WSY9;Q16881;E9PRI8;E9PQI3;E9PLT3;E9PKI4;A0A0B4J225;E9PIZ5;E9PKD3;E2QRB9	Thioredoxin reductase 1, cytoplasmic	E9PIR7;F8W809;A0A087WSW9;A0A087WSY9;Q16881;E9PRI8;E9PQI3;E9PLT3;E9PKI4;A0A0B4J225;E9PIZ5;E9PKD3;E2QRB9	TXNRD1	19.3335	20.0721	19.8678	18.6576	19.1687	20.3324	20.5138	20.294	20.4703			0.275023	0.530857	0.371582	1.29377
H0Y4R1;P12268;E7ETK5	Inosine-5-monophosphate dehydrogenase 2	H0Y4R1;P12268;E7ETK5	IMPDH2	24.382	24.6643	24.8944	24.6309	23.7718	24.4198	24.9562	24.8377	24.9111			0.554244	0.279098	0.372722	1.29479
P15121;E9PCX2;E9PEF9;C9JRZ8	Aldose reductase	P15121;E9PCX2	AKR1B1	20.7647	21.5574	22.5752	21.5288	21.727	20.5205	21.8043	21.6973	21.7092			0.227258	0.592573	0.373692	1.29566
J3QQM1;P62195;J3QSA9;J3QSE0;J3QLH6;J3KRP2;J3QRW1;J3KTQ9;J3QRR3	26S protease regulatory subunit 8	J3QQM1;P62195;J3QSA9;J3QSE0;J3QLH6;J3KRP2	PSMC5	22.6719	22.5653	22.8078	22.6671	21.7485	22.5072	22.4822	22.84	22.9663			0.569825	0.269262	0.374069	1.296
Q96EY1	DnaJ homolog subfamily A member 3, mitochondrial	Q96EY1	DNAJA3	22.9269	22.8929	22.2108	22.2399	22.3475	22.3147	22.2829	22.2137	22.3396			0.732137	0.185295	0.376167	1.29789
P46060;B0QYT6;B0QYT5;B0QYT4;H0Y4Q3	Ran GTPase-activating protein 1	P46060	RANGAP1	21.1523	21.4826	21.7563	20.9663	21.4516	20.8428	21.6015	21.6841	21.9461			0.670723	0.21344	0.376874	1.29852
SYH_HUMAN;P12081;B4DDD8;B3KWE1;E7ETE2;B4E1C5;D6RF05;D6RJE6	Histidine--tRNA ligase, cytoplasmic	SYH_HUMAN;P12081;B4DDD8;B3KWE1;E7ETE2;B4E1C5	HARS	22.5867	22.6533	22.1967	22.0971	22.0498	22.1579	22.0739	22.2998	22.3864			1.21594	0.0608222	0.377284	1.29889
P62750;H7BY10;K7EJV9;K7ERT8;A8MUS3;K7EMA7	60S ribosomal protein L23a	P62750;H7BY10;K7EJV9;K7ERT8;A8MUS3;K7EMA7	RPL23A	25.6996	25.3264	26.1992	25.61	25.0029	25.4654	26.2056	26.3331	26.4245			0.540776	0.287888	0.382298	1.30342
R4GMT0;P61163	Alpha-centractin	R4GMT0;P61163	ACTR1A	21.4965	22.0192	22.8888	22.2557	21.197	21.8017	22.6642	22.339	22.6419			0.307028	0.493142	0.383347	1.30436
P22314;Q5JRR6;Q5JRR9;Q5JRS0;Q5JRS1;Q5JRS3;Q5JRS2	Ubiquitin-like modifier-activating enzyme 1	P22314	UBA1	25.76	25.8733	26.1471	25.6716	25.2376	25.7102	26.3633	26.1952	26.4141			0.952465	0.111567	0.386984	1.30766
P62328	Thymosin beta-4;Hematopoietic system regulatory peptide	P62328	TMSB4X	22.7826	19.3845	21.0282	20.6636	21.0458	20.3229	20.712	22.0068	20.9662			0.143379	0.718821	0.387684	1.30829
B1AMS2;Q14141;D6RDU5;D6RGI3;D6RER5;Q9NVA2;A0A087X142;A6NMH6;A6NFQ9;F8W8I8;Q92599;D6RDP1;C9JV02;D6R9Y6;H0Y961	Septin-6	B1AMS2;Q14141	2017-09-06	22.9888	23.3696	23.1663	23.045	22.6272	22.6838	23.3376	23.1307	23.4206			1.07121	0.0848762	0.389584	1.31002
Q8IY81	pre-rRNA processing protein FTSJ3	Q8IY81	FTSJ3	21.7714	21.9925	21.3926	21.3222	21.8989	20.7658	21.478	21.5353	21.3927			0.452617	0.352682	0.389863	1.31027
E9PFN5;Q9Y2Q3	Glutathione S-transferase kappa 1	E9PFN5;Q9Y2Q3	GSTK1	22.8785	23.1427	22.5375	22.6167	22.8688	21.8916	22.6015	22.6073	22.6506			0.504842	0.312722	0.393898	1.31394
Q08945;E9PMD4;A0A0U1RRK2	FACT complex subunit SSRP1	Q08945	SSRP1	23.6977	24.1691	23.6392	23.6606	23.0194	23.6409	24.2731	24.2637	24.3303			0.665385	0.21608	0.395047	1.31499
P33176;A0A0G2JMZ6;J3KNA1;O60282;Q12840	Kinesin-1 heavy chain	P33176	KIF5B	21.3578	21.687	22.1174	21.544	21.4561	20.9589	21.8856	22.539	22.4171			0.632894	0.232866	0.401087	1.3205
Q15084	Protein disulfide-isomerase A6	Q15084	PDIA6	23.34	23.9122	24.4642	24.0074	22.8147	23.6837	24.1322	24.1765	24.113			0.347365	0.449402	0.403552	1.32276
P21281;C9JL73;P15313;H0YAT8;E5RGH6;H0YC04;C9J5E3;C9JNS9	V-type proton ATPase subunit B, brain isoform	P21281	ATP6V1B2	21.5257	21.7014	21.94	21.8715	20.5949	21.485	21.6104	21.851	22.1292			0.438143	0.364634	0.405219	1.32429
O76094;R4GNC1;D6RDY6	Signal recognition particle subunit SRP72	O76094	SRP72	21.2624	21.6473	21.7862	21.0616	20.869	21.5474	22.2171	22.3082	22.3757			0.727488	0.187289	0.405972	1.32498
J3QKW2;J3QLS3;Q9Y2R9;J3QQS1;J3KSI8	28S ribosomal protein S7, mitochondrial	J3QKW2;J3QLS3;Q9Y2R9;J3QQS1	MRPS7	22.2587	22.2137	20.8461	19.8793	23.4857	20.7309	21.728	21.6563	21.864			0.126202	0.747821	0.407531	1.32641
O95336;M0R261;M0R0U3;M0R1L2	6-phosphogluconolactonase	O95336;M0R261;M0R0U3	PGLS	22.2658	22.4051	22.2671	22.0513	21.4664	22.1975	22.4418	22.6498	22.3703			0.82823	0.148515	0.407539	1.32642
P11388;J3KTB7	DNA topoisomerase 2-alpha	P11388	TOP2A	26.0291	25.9216	25.516	25.4944	25.1691	25.5797	25.7685	25.9027	25.9296			0.953844	0.111213	0.407864	1.32672
P00813;F5GWI4;F5GXW0;F5GYD4	Adenosine deaminase	P00813;F5GWI4	ADA	23.5442	23.7078	25.2277	24.0943	23.3452	23.8166	24.3031	24.5841	24.3657			0.284073	0.519908	0.407895	1.32675
P51572;C9JSP1;C9JQ75;C9J0M4	B-cell receptor-associated protein 31	P51572	BCAP31	21.3833	20.9074	22.3845	21.5071	20.374	21.5625	22.725	22.4893	22.6102			0.284071	0.519912	0.410519	1.32916
P09211;GSTP1_HUMAN;A8MX94;A0A087X2E9;A0A087X243	Glutathione S-transferase P	P09211;GSTP1_HUMAN;A8MX94	GSTP1	24.8524	25.2936	26.1571	25.3963	24.5106	25.1466	25.5533	25.3274	25.292			0.375616	0.421099	0.416525	1.33471
P00403	Cytochrome c oxidase subunit 2	P00403	MT-CO2	22.329	22.8746	23.0238	22.0208	22.2823	22.6745	23.2053	23.123	23.3222			0.664863	0.21634	0.416601	1.33478
F8VU51;P49750	YLP motif-containing protein 1	F8VU51;P49750	YLPM1	20.9143	20.6296	22.0732	20.3996	20.9912	20.9749	20.0303	20.4712	20.5981			0.360512	0.436001	0.417133	1.33527
P61604;B8ZZL8;B8ZZ54;S4R3N1	10 kDa heat shock protein, mitochondrial	P61604;B8ZZL8;B8ZZ54	HSPE1	24.3194	23.9828	24.8055	24.004	23.8761	23.971	24.0927	24.1749	24.0904			0.800451	0.158325	0.418865	1.33687
O00231;J3QRY4;J3QS13	26S proteasome non-ATPase regulatory subunit 11	O00231	PSMD11	22.3664	22.2278	23.3001	22.4948	21.873	22.2654	23.1584	23.3534	23.1798			0.476858	0.333536	0.420338	1.33824
P20700;E9PBF6;A0A0D9SFE5;A0A0D9SFY5;A0A0C4DGC5	Lamin-B1	P20700;E9PBF6;A0A0D9SFE5	LMNB1	24.9809	24.9473	25.6773	24.6999	24.861	24.7716	25.5087	25.5903	25.3807			0.809527	0.15505	0.424295	1.34192
Q96KP4;J3QKT2;J3KRD5;J3QQN6;J3QR27;J3QLU1;A0A087WVS2;J3QKQ0;J3QRD0;J3QL02;J3KSV5;A0A087WYZ1;J3QRA8;J3QRH4	Cytosolic non-specific dipeptidase	Q96KP4	CNDP2	22.8682	23.0864	22.9541	22.3567	22.4275	22.841	23.0181	23.4898	23.1804			1.22687	0.0593108	0.427875	1.34525
Q92608;E5RFJ0;E7ERW7;F6S220;H0YB76;H0Y7N4;Q9H7D0	Dedicator of cytokinesis protein 2	Q92608;E5RFJ0;E7ERW7	DOCK2	22.8175	22.5595	23.5666	22.6043	22.7301	22.324	23.5808	23.6599	23.9964			0.588553	0.257898	0.42838	1.34572
P08133;E5RK69;E7EMC6;E5RFF0;H0YC77;E5RJF5;E5RK63;E5RI05;E5RJR0	Annexin A6;Annexin	P08133;E5RK69;E7EMC6	ANXA6	23.2775	23.7067	24.199	23.7888	22.4835	23.623	24.2542	24.3525	24.3774			0.366968	0.429568	0.429354	1.34663
Q96EY7;B8ZZQ4;F8WE76	Pentatricopeptide repeat domain-containing protein 3, mitochondrial	Q96EY7;B8ZZQ4	PTCD3	22.6981	21.611	21.8506	21.497	21.4906	21.8824	21.5798	21.6846	21.4014			0.535072	0.291694	0.42993	1.34717
P22830;K7ELX4;K7EJX5;K7EPN2	Ferrochelatase, mitochondrial;Ferrochelatase	P22830;K7ELX4;K7EJX5	FECH	22.1668	21.9883	21.7453	21.1054	22.385	21.0999	21.1964	21.875	21.5515			0.418462	0.381538	0.436716	1.35352
V9GYM8;Q92974;V9GYF0;Q5VY93;V9GYF5;V9GYG5;V9GZ14	Rho guanine nucleotide exchange factor 2	V9GYM8;Q92974	ARHGEF2	21.8226	21.8315	22.5719	22.2015	21.2618	21.4421	22.6344	22.2799	22.8214			0.506779	0.31133	0.440241	1.35683
E7ES33;E7EPK1;Q16181;G3V1Q4;A0A0U1RRE1;A0A0U1RQK0;A0A0U1RRD1;Q5JXL7;A0A0U1RRM2;A0A0U1RRH9;Q6ZU15	Septin-7	E7ES33;E7EPK1;Q16181;G3V1Q4	2017-09-07	22.5779	22.6625	23.2259	22.6068	22.1415	22.3934	23.5045	23.1428	23.2787			0.840468	0.144388	0.441545	1.35806
PRDX1_HUMAN;Q06830;A0A0A0MSI0;A0A0A0MRQ5	Peroxiredoxin-1	PRDX1_HUMAN;Q06830;A0A0A0MSI0	PRDX1	25.0993	25.4701	26.5201	25.3011	25.1062	25.3565	25.9374	25.819	25.6481			0.438413	0.364407	0.44188	1.35837
Q92665	28S ribosomal protein S31, mitochondrial	Q92665	MRPS31	21.8693	22.2445	21.0395	20.4813	21.5546	21.7909	20.4094	20.1956	20.1893			0.340035	0.457051	0.442198	1.35867
Q02878;F8VZ45;U3KQR5;F8VR69;F8VZA3;F8VWR1;F8VU16	60S ribosomal protein L6	Q02878	RPL6	26.6266	26.6763	26.4033	26.0772	26.1797	26.1187	26.1411	26.6157	26.3552			2.11931	0.00759776	0.443544	1.35994
P31948;F5H783;H0YGI8;F5GXD8	Stress-induced-phosphoprotein 1	P31948	STIP1	24.5129	24.9305	25.5515	24.8576	24.2833	24.52	24.97	25.0044	25.1176			0.574219	0.266552	0.444698	1.36103
P50897;E9PSE5;E9PP28;E9PK48;E9PIA8;E9PMG2	Palmitoyl-protein thioesterase 1	P50897;E9PSE5;E9PP28;E9PK48;E9PIA8;E9PMG2	PPT1	21.5465	19.6496	22.5526	20.4848	19.6974	22.2236	21.5401	21.7531	21.3005			0.147098	0.712693	0.447632	1.3638
O75367;B4DJC3;D6RCF2;Q5SQT3;Q9P0M6	Core histone macro-H2A.1;Histone H2A	O75367;B4DJC3	H2AFY	27.0981	27.4583	26.6931	26.5747	26.5882	26.7317	26.7912	26.8174	26.8582			0.931428	0.117104	0.451642	1.3676
Q9Y2V2;H3BTK3;I3L3X8;H3BSW7;H3BUY4;H3BPY5;H3BNU9	Calcium-regulated heat stable protein 1	Q9Y2V2;H3BTK3;I3L3X8;H3BSW7;H3BUY4;H3BPY5;H3BNU9	CARHSP1	22.1842	19.9608	20.905	19.6065	20.2863	21.8015	19.3059	20.6958	20.7287			0.189081	0.647022	0.451919	1.36786
P68363;F8VQQ4;F8VVB9;F8VRZ4;F8VS66;F8VX09;F8VWV9;A6NHL2;C9K0S6;F8VRK0;F8VXZ7;F8W0F6	Tubulin alpha-1B chain	P68363	TUBA1B	28.324	28.8053	29.1679	28.7138	27.8229	28.403	28.9701	28.9761	29.1984			0.561519	0.274461	0.45247	1.36838
P49915	GMP synthase [glutamine-hydrolyzing]	P49915	GMPS	21.9813	22.0417	22.5822	22.1955	21.3187	21.7274	23.1581	22.9134	22.5446			0.647418	0.225207	0.45455	1.37036
P24534;F8WF65;F2Z2G2;C9JZW3	Elongation factor 1-beta	P24534	EEF1B2	20.7617	20.7859	22.2095	20.7328	21.4126	20.2469	21.1051	21.2482	21.0181			0.31793	0.480916	0.454889	1.37068
H0YE91;Q15782;H0YEJ1;E9PRL9;E9PII8;E9PPX4;E9PP75;E9PIX1;E9PR52	Chitinase-3-like protein 2	H0YE91;Q15782	CHI3L2	22.4001	21.8809	22.0781	21.2097	21.5395	22.2318	20.776	21.4134	21.2982			0.611541	0.244601	0.459349	1.37492
P62805	Histone H4	P62805	HIST1H4A	30.6248	30.953	30.6182	30.5404	29.9932	30.2719	31.2656	30.9708	30.8623			1.13065	0.0740195	0.463488	1.37887
Q15102;M0R389;M0QXS6;M0R323;M0QZT2;M0R1K3	Platelet-activating factor acetylhydrolase IB subunit gamma	Q15102;M0R389	PAFAH1B3	22.2642	22.0674	22.769	22.424	21.0523	22.2258	22.7712	22.9958	22.8198			0.416602	0.383176	0.466134	1.3814
P51114;B4DXZ6;E9PFF5;E7EU85;C9JAJ4;C9JYQ6;R9WNI0;A8MQB8;G3V0J0;Q06787	Fragile X mental retardation syndrome-related protein 1	P51114;B4DXZ6;E9PFF5;E7EU85	FXR1	23.8841	23.8889	23.8474	23.0885	23.507	23.6177	22.1521	22.0043	22.2064			1.35584	0.0440721	0.469041	1.38419
F6T1Q0;Q6L8Q7	2,5-phosphodiesterase 12	F6T1Q0;Q6L8Q7	PDE12	22.3068	22.1955	21.4686	21.4618	21.621	21.4792	21.6372	21.8161	21.6633			0.812078	0.154142	0.46963	1.38475
P30153;C9J9C1;B3KQV6;E9PH38;E9PPI5;E9PNM7;E9PHZ6	Serine/threonine-protein phosphatase 2A 65 kDa regulatory subunit A alpha isoform	P30153;C9J9C1;B3KQV6	PPP2R1A	21.614	22.2616	22.3393	21.7112	21.0265	22.0465	22.5477	22.1126	22.7553			0.559522	0.275726	0.476895	1.39175
P42766;F2Z388	60S ribosomal protein L35	P42766;F2Z388	RPL35	20.2852	20.3807	21.7839	19.2173	21.322	20.4798	20.876	20.3898	21.9103			0.241038	0.574067	0.476897	1.39175
Q96C36;A0A087WTV6;A0A087WZR9;J3KR12;A0A087WX69;A0A087WZF0	Pyrroline-5-carboxylate reductase 2;Pyrroline-5-carboxylate reductase	Q96C36;A0A087WTV6;A0A087WZR9;J3KR12	PYCR2	21.9237	22.5255	22.071	21.8229	21.583	21.676	21.6481	21.7841	21.9772			1.16154	0.0689379	0.479493	1.39425
P53618;E9PP73;E9PP63;E9PKQ1	Coatomer subunit beta	P53618	COPB1	21.6782	21.1486	22.7249	21.7916	21.1548	21.1661	22.3146	21.8524	22.5644			0.399008	0.399018	0.479762	1.39451
P07737;K7EJ44;I3L3D5;CON__P02584	Profilin-1	P07737;K7EJ44	PFN1	24.8741	25.665	26.7468	25.3333	25.2158	25.294	25.1481	25.2168	25.4163			0.370059	0.426521	0.480897	1.39561
B9A067;Q16891;C9J406;H7C463;A0A087WYS0;D6RAW4	MICOS complex subunit MIC60	B9A067;Q16891;C9J406;H7C463	IMMT	24.0372	24.0017	24.7035	23.8032	23.6169	23.8778	24.335	24.2928	24.632			0.933704	0.116492	0.481441	1.39614
A0A0A6YY92;P30566;A0A096LNY5;B4DEP1;A0A096LP72;A0A096LNY4;A0A096LNY6	Adenylosuccinate lyase	A0A0A6YY92;P30566;A0A096LNY5;B4DEP1;A0A096LP72;A0A096LNY4;A0A096LNY6	ADSL	19.1126	21.2427	22.0762	19.9756	21.4569	19.5464	21.6383	21.3079	21.5913			0.173832	0.670144	0.484229	1.39884
P23368;Q6TCH8;E9PMB9;Q16798	NAD-dependent malic enzyme, mitochondrial	P23368	ME2	23.9121	24.0014	23.1671	23.2371	23.123	23.267	23.7581	23.6179	23.8807			0.838686	0.144982	0.484526	1.39913
P25098;E9PRV7;Q8N433;P35626	Beta-adrenergic receptor kinase 1	P25098;E9PRV7	ADRBK1	20.0114	20.544	20.3784	20.3519	20.1661	18.9529	20.594	20.8415	21.1493			0.450451	0.354445	0.487633	1.40214
A0A0D9SFK2;Q92614	Unconventional myosin-XVIIIa	A0A0D9SFK2;Q92614	MYO18A	21.8824	21.2837	22.4413	20.3496	22.1535	21.6282	22.8572	22.693	19.9915			0.319383	0.479311	0.492057	1.40645
O95168;F2Z3P9;C9JXQ9	NADH dehydrogenase [ubiquinone] 1 beta subcomplex subunit 4	O95168;F2Z3P9;C9JXQ9	NDUFB4	20.503	20.9725	21.3387	20.7268	20.0259	20.5815	20.9051	21.1459	20.7007			0.696766	0.201017	0.493317	1.40768
P12270	Nucleoprotein TPR	P12270	TPR	22.8424	23.1399	23.175	22.5361	22.1358	22.9965	23.26	23.2669	23.2344			0.853635	0.140076	0.496247	1.41054
Q8NBS9	Thioredoxin domain-containing protein 5	Q8NBS9	TXNDC5	21.1924	21.3016	21.9914	21.2823	20.8884	20.8259	21.2067	21.5609	21.5144			0.795867	0.160005	0.496276	1.41057
Q8IXT1	DNA damage-induced apoptosis suppressor protein	Q8IXT1	DDIAS	25.5724	25.1119	25.0991	23.4638	25.509	25.3135	19.7935	24.0818	24.7334			0.30302	0.497714	0.499055	1.41329
B4DJ81;P28331	NADH-ubiquinone oxidoreductase 75 kDa subunit, mitochondrial	B4DJ81;P28331	NDUFS1	22.3563	22.7582	21.986	22.0195	21.6974	21.8698	22.1261	21.7825	22.1859			0.978761	0.105012	0.504599	1.41873
H0Y5B4;H7BZ11;J3KQN4;P83881;H7BY91;H0Y3V9;Q969Q0	60S ribosomal protein L36a;60S ribosomal protein L36a-like	H0Y5B4;H7BZ11;J3KQN4;P83881;H7BY91;H0Y3V9;Q969Q0	RPL36A;RPL36A-HNRNPH2;RPL36AL	22.9632	22.6444	22.6007	22.7923	21.596	22.3049	22.3174	22.412	22.3085			0.621008	0.239327	0.50505	1.41917
O00567;H0Y653;H0YDU4;Q5JXT2	Nucleolar protein 56	O00567;H0Y653;H0YDU4	NOP56	24.1873	24.1886	23.782	23.6587	23.2358	23.7457	24.0779	24.2521	24.3202			1.1457	0.0714997	0.505884	1.41999
Q8NFW8;F5GYM0	N-acylneuraminate cytidylyltransferase	Q8NFW8;F5GYM0	CMAS	21.4842	21.3228	20.599	20.241	21.3176	20.311	20.9396	21.4048	20.9605			0.507665	0.310696	0.512154	1.42618
P06748;E5RI98;E5RGW4	Nucleophosmin	P06748;E5RI98	NPM1	24.875	24.9137	24.8044	24.3329	24.0512	24.6674	24.6291	24.7201	24.9571			1.32919	0.046861	0.513907	1.42791
D3YTB1;F8W727;P62910;D3YTI8	60S ribosomal protein L32	D3YTB1;F8W727;P62910	RPL32	23.984	24.0697	23.8097	22.817	23.4492	24.0513	23.4901	23.0623	23.7875			0.637662	0.230324	0.515296	1.42929
P14923;C9JK18;C9JKY1;C9J826;C9JTX4;C9JPI2;K7ERP3;B4DGU4;P35222	Junction plakoglobin	P14923	JUP	26.6569	27.0167	26.557	25.8339	26.9706	25.8543	26.0754	27.0828	24.2151			0.583229	0.261079	0.523927	1.43786
P35998;C9JLS9	26S protease regulatory subunit 7	P35998	PSMC2	23.5265	23.2116	23.48	23.1702	22.5227	22.9473	23.6834	23.6354	23.4739			1.15705	0.0696543	0.525979	1.43991
P62879;C9JIS1;C9JXA5;E7EP32;C9JZN1;Q9HAV0;C9JD14	Guanine nucleotide-binding protein G(I)/G(S)/G(T) subunit beta-2;Guanine nucleotide-binding protein subunit beta-4	P62879;C9JIS1;C9JXA5;E7EP32;C9JZN1;Q9HAV0	GNB2;GNB4	21.7865	21.4343	22.0856	21.1677	20.389	22.1668	21.2624	21.515	21.2138			0.408853	0.390074	0.527594	1.44152
Q14676	Mediator of DNA damage checkpoint protein 1	Q14676	MDC1	21.0302	20.8822	20.2668	20.0873	20.0533	20.4498	20.7578	20.3437	20.7542			0.93081	0.117271	0.529583	1.44351
P55884;C9JZG1;C9JQN7	Eukaryotic translation initiation factor 3 subunit B	P55884	EIF3B	22.2777	21.2436	20.9388	23.1478	19.0791	20.6379	21.0893	20.807	20.658			0.159264	0.693005	0.531762	1.44569
P63267;P68133;P68032;P62736;A6NL76;F8WB63;B8ZZJ2;C9JFL5;F6UVQ4;F6QUT6	Actin, gamma-enteric smooth muscle;Actin, alpha skeletal muscle;Actin, alpha cardiac muscle 1;Actin, aortic smooth muscle	P63267;P68133;P68032;P62736;A6NL76	ACTG2;ACTA1;ACTC1;ACTA2	21.2603	23.7021	25.6244	24.1741	21.9227	22.8944	25.3627	24.3192	24.596			0.138339	0.727212	0.531861	1.44579
P31930	Cytochrome b-c1 complex subunit 1, mitochondrial	P31930	UQCRC1	22.8601	23.5614	23.8219	23.2471	22.6911	22.709	23.4359	23.3467	23.4793			0.714675	0.192897	0.532082	1.44601
Q9BW19;A0A087X1W5;A2AB20;A0A140T9E6	Kinesin-like protein KIFC1	Q9BW19	KIFC1	21.3048	20.9062	21.327	20.8924	20.0922	20.9545	20.8919	21.5036	21.4221			0.795431	0.160165	0.532972	1.44691
Q9H0D6	5-3 exoribonuclease 2	Q9H0D6	XRN2	21.7501	21.8233	21.8572	21.9897	20.2966	21.5318	22.4444	22.076	22.8501			0.457786	0.348509	0.537528	1.45148
A0A087WZT3;Q9H3K6;H3BV85;H3BTW0;A0A0B4J295;H3BVE0	BolA-like protein 2	A0A087WZT3;Q9H3K6;H3BV85;H3BTW0;A0A0B4J295;H3BVE0	BOLA2;BOLA2B	21.935	21.0982	20.9205	21.1366	20.7286	20.4709	19.5409	20.7406	20.7736			0.664112	0.216714	0.53917	1.45314
Q9NR30	Nucleolar RNA helicase 2	Q9NR30	DDX21	25.9357	26.0148	25.2285	25.1045	25.1683	25.2817	25.3166	25.3776	25.4833			0.994794	0.101206	0.541512	1.4555
Q9Y4W6;K7EP56	AFG3-like protein 2	Q9Y4W6	AFG3L2	22.7164	22.6188	22.2202	21.6075	22.103	22.2164	21.3998	21.5376	21.3884			1.05929	0.0872381	0.542838	1.45684
Q9P0L0;J3QKM9	Vesicle-associated membrane protein-associated protein A	Q9P0L0	VAPA	20.7893	21.6474	22.299	21.3399	20.749	21.0165	22.4004	22.5022	22.295			0.506698	0.311388	0.543412	1.45742
P18124;A8MUD9;C9JIJ5;C9JZ88	60S ribosomal protein L7	P18124;A8MUD9	RPL7	25.9344	25.6963	26.1406	25.2938	25.2388	25.602	25.9899	26.0338	26.2455			1.47857	0.0332224	0.545575	1.4596
P84095	Rho-related GTP-binding protein RhoG	P84095	RHOG	23.0587	22.1817	23.2898	22.4248	22.341	22.1226	22.4849	23.0804	23.2101			0.716042	0.192291	0.547249	1.4613
P68431;Q71DI3;Q16695;K7EK07;P84243;K7EMV3;B4DEB1;K7ES00;Q6NXT2;K7EP01	Histone H3.1;Histone H3.2;Histone H3.1t;Histone H3;Histone H3.3;Histone H3.3C	P68431;Q71DI3;Q16695;K7EK07;P84243;K7EMV3;B4DEB1;K7ES00;Q6NXT2	HIST1H3A;HIST2H3A;HIST3H3;H3F3B;H3F3A;H3F3C	29.6525	30.0141	29.4975	29.1723	29.1151	29.2323	29.5949	29.6211	29.6426			1.60242	0.0249792	0.548098	1.46216
O94925;H7BZD1;C9JIJ6;B7Z509;H7C201	Glutaminase kidney isoform, mitochondrial	O94925	GLS	24.2843	24.2946	23.6036	23.3565	23.5183	23.661	23.4331	23.8098	23.6496			1.05285	0.0885411	0.548915	1.46298
B4DJV2;O75390;A0A0C4DGI3;H0YIC4;F8VPF9;F8VPA1;F8VTT8;F8W1S4;F8W4S1;H0YH82;F8W642;F8VZK9;F8VX07;F8VRP1;F8VX68;F8VWQ5;F8VRI6;F8VR34;F8W0J2;F8VP03;F8VU34	Citrate synthase;Citrate synthase, mitochondrial	B4DJV2;O75390;A0A0C4DGI3	CS	25.0029	24.5235	24.3828	24.3337	23.6562	24.2586	24.2639	24.1535	24.4307			0.906536	0.124012	0.553554	1.4677
Q10567;C9J1E7	AP-1 complex subunit beta-1	Q10567;C9J1E7	AP1B1	20.0936	20.7053	19.8088	18.6422	19.9776	20.3149	20.3129	19.7882	20.4047			0.412098	0.38717	0.557649	1.47187
P55084;F5GZQ3;B5MD38;C9JEY0;C9JE81;C9K0M0	Trifunctional enzyme subunit beta, mitochondrial;3-ketoacyl-CoA thiolase	P55084;F5GZQ3;B5MD38	HADHB	24.1749	23.9739	23.4004	23.6524	22.9827	23.2305	23.0121	23.1495	22.7904			0.859993	0.138041	0.561203	1.4755
K7EL40;Q9UHD8;K7EK18;K7ER52;K7EIE4;K7EQD7;K7ELJ9;K7EIR4;K7EKN4;K7EN52;K7ENQ5;K7EJZ2;K7ER14	Septin-9	K7EL40;Q9UHD8;K7EK18;K7ER52;K7EIE4;K7EQD7;K7ELJ9	2017-09-09	22.7022	22.6968	23.6769	22.8101	22.0646	22.5096	23.3938	23.3306	23.2334			0.651795	0.222948	0.563861	1.47822
P35754	Glutaredoxin-1	P35754	GLRX	20.5121	21.0513	20.8375	20.9681	20.6529	19.0853	21.0742	21.0688	20.9226			0.395874	0.401908	0.564849	1.47923
F8WAU4;C9IZ01;Q96RP9	Elongation factor G, mitochondrial	F8WAU4;C9IZ01;Q96RP9	GFM1	23.9132	23.3556	22.5782	22.677	22.8178	22.6544	19.1337	21.3489	22.3056			0.655917	0.220842	0.565926	1.48034
X6R8F3;P80188	Neutrophil gelatinase-associated lipocalin	X6R8F3;P80188	LCN2	21.21	22.5104	18.9114	19.3225	20.727	20.8705	19.4011	19.2075	19.8192			0.187633	0.649183	0.570618	1.48516
P34897;H0YIZ0;G3V2Y4;G3V5L0;G3V4W5;G3V540;G3V241;G3V3Y8;G3V4T0;G3V4X0;G3V2W0;G3V2E4;G3V2D2;P34896	Serine hydroxymethyltransferase, mitochondrial;Serine hydroxymethyltransferase	P34897;H0YIZ0	SHMT2	26.2362	26.2292	25.8329	25.4855	25.417	25.6777	25.5581	25.4537	25.5044			1.68429	0.0206878	0.57271	1.48731
P22695;H3BRG4;H3BSJ9;H3BP04;H3BUE4;H3BUI9;A0A087WVZ4	Cytochrome b-c1 complex subunit 2, mitochondrial	P22695;H3BRG4;H3BSJ9;H3BP04	UQCRC2	23.5858	23.3688	24.0936	23.1268	22.8882	23.3131	23.8149	23.7218	23.5931			1.08917	0.0814383	0.573362	1.48799
A0A0D9SFS3;E9PDF2;E9PCR7;Q02218;E9PFG7;C9J4G7;Q9ULD0	2-oxoglutarate dehydrogenase, mitochondrial	A0A0D9SFS3;E9PDF2;E9PCR7;Q02218;E9PFG7	OGDH	21.9767	21.8743	21.3868	21.0604	21.2392	21.2058	21.2822	21.2271	21.234			1.41493	0.0384653	0.577472	1.49223
Q09028;E9PNS2;E9PIC4;E9PNS6;H0YEU5;H0YCT5;H0YF10;H0YDK2;E9PC52;Q16576;C9JAJ9;Q5JP02	Histone-binding protein RBBP4	Q09028	RBBP4	22.9447	22.4264	23.3108	21.9828	22.1179	22.84	22.2529	22.5146	22.6902			0.718015	0.191419	0.580433	1.4953
H7C131;P09110;C9JDE9;H0Y4D4;B4DVF4	3-ketoacyl-CoA thiolase, peroxisomal	H7C131;P09110;C9JDE9	ACAA1	21.6578	21.7795	22.01	22.1837	19.7069	21.8125	22.0422	22.1924	22.4684			0.304104	0.496473	0.581406	1.49631
P24666;G5E9R5;F2Z2Q9;D3YTI2	Low molecular weight phosphotyrosine protein phosphatase	P24666;G5E9R5	ACP1	21.0426	21.4115	21.5722	20.9416	20.8682	20.4705	20.1441	21.216	20.9569			1.27314	0.0533159	0.582005	1.49693
Q9H845;H0Y8Z9;D6RCD8	Acyl-CoA dehydrogenase family member 9, mitochondrial	Q9H845	ACAD9	22.0687	22.2429	21.4162	21.2154	22.5327	20.2318	22.0854	21.1735	21.9696			0.337833	0.459375	0.582666	1.49761
A0A087WV73;P46087;F5H5X6;F5GYR3	Probable 28S rRNA (cytosine(4447)-C(5))-methyltransferase	A0A087WV73;P46087	NOP2	24.3978	24.2862	23.5785	23.2636	23.6405	23.6042	23.886	23.8627	23.9902			0.96701	0.107892	0.584731	1.49976
P48047;H7C0C1;H7C086;H7C068	ATP synthase subunit O, mitochondrial	P48047;H7C0C1	ATP5O	24.9724	25.0409	24.9927	24.9461	23.6676	24.6234	24.9161	24.7147	24.9003			0.699353	0.199824	0.589628	1.50486
Q8TCS8;H7C3C5	Polyribonucleotide nucleotidyltransferase 1, mitochondrial	Q8TCS8	PNPT1	23.2687	23.3709	22.7598	22.4106	22.3897	22.8228	22.7105	22.7832	22.7509			1.18055	0.0659862	0.592103	1.50744
A0A0A0MT49;Q9HBD4;P51532;F6VDE0;P51531;A0A0U1RRF5;A0A0U1RRD6;A0A0U1RRF8;A0A0A0MSS5;F6UH26;A0A0U1RQU0;A0A0U1RR09;F6XE55;A0A0U1RQW7;A0A0U1RRN2;B1ALG1;A0A0U1RR83;A0A0U1RQX3;F6T8Q0;B1ALG2;A0A0U1RR26;A0A0U1RRG6;B4DNT1;B1ALF6;A0A0U1RQZ9	Transcription activator BRG1	A0A0A0MT49;Q9HBD4;P51532	SMARCA4	21.5114	21.5542	21.9599	21.1533	21.3462	20.742	21.9268	21.877	22.1653			1.22317	0.0598174	0.594688	1.51015
O00170;E9PMH2;V9GYQ3	AH receptor-interacting protein	O00170;E9PMH2	AIP	21.8203	21.3885	22.0123	21.9019	21.3373	20.1893	21.8674	21.7754	21.7246			0.484353	0.327829	0.597548	1.51314
P30044	Peroxiredoxin-5, mitochondrial	P30044	PRDX5	22.8682	22.8213	22.8109	22.457	21.9781	22.2663	22.0713	22.4456	22.2679			1.88882	0.0129174	0.599672	1.51537
Q15021;E7EN77;F5H431;F5GZK7	Condensin complex subunit 1	Q15021	NCAPD2	21.4187	20.774	20.1696	18.8469	20.9335	20.7815	21.1655	20.6382	21.5679			0.323169	0.47515	0.600168	1.51589
Q9NSE4	Isoleucine--tRNA ligase, mitochondrial	Q9NSE4	IARS2	24.1005	23.9232	23.2614	23.1756	23.2372	23.0665	23.0737	23.6216	23.2213			1.08777	0.0817024	0.601957	1.51777
P55809;E9PDW2;Q9BYC2	Succinyl-CoA:3-ketoacid coenzyme A transferase 1, mitochondrial	P55809;E9PDW2	OXCT1	23.0585	22.6629	23.0443	22.2446	22.2131	22.4955	23.0917	22.9171	22.8199			1.73345	0.0184736	0.604184	1.52012
G3V1C3;Q9BZZ5;E9PQK6;H0YER7	Apoptosis inhibitor 5	G3V1C3;Q9BZZ5	API5	22.2423	21.8543	21.5851	20.315	21.8311	21.7151	21.8466	22.2685	22.1423			0.507786	0.310609	0.606836	1.52292
P54577;A0A0C4DGZ5	Tyrosine--tRNA ligase, cytoplasmic;Tyrosine--tRNA ligase, cytoplasmic, N-terminally processed;Tyrosine--tRNA ligase	P54577;A0A0C4DGZ5	YARS	22.7331	22.2508	22.5474	21.9682	21.4989	22.2384	22.4172	22.1813	21.8289			1.11071	0.0774986	0.608636	1.52482
Q10471	Polypeptide N-acetylgalactosaminyltransferase 2;Polypeptide N-acetylgalactosaminyltransferase 2 soluble form	Q10471	GALNT2	21.4444	21.5925	22.022	21.1814	20.5386	21.494	22.367	22.4806	22.5336			0.866044	0.136131	0.614922	1.53148
Q86YV0;V9GYD1;M0QX12	RAS protein activator like-3	Q86YV0;V9GYD1	RASAL3	22.0323	22.1002	21.9275	21.8511	20.2904	22.0676	22.4057	22.3866	22.4632			0.476313	0.333954	0.616995	1.53368
P82933	28S ribosomal protein S9, mitochondrial	P82933	MRPS9	22.632	22.1282	21.6904	21.3271	21.5882	21.684	21.3783	20.9644	21.1068			0.990276	0.102264	0.617104	1.53379
P27824;D6RAQ8;D6RFL1;D6RAU8;D6RB85;D6RDP7;H0Y9Q7;H0Y9H1;D6RGY2;D6RHJ3;D6RD16	Calnexin	P27824	CANX	21.8849	22.029	23.828	22.5651	21.4875	21.833	23.9054	24.0206	23.7727			0.369209	0.427357	0.618769	1.53556
P50454;E9PKH2;H0YEP8;E9PQ34;E9PJH8;E9PIG2;E9PRS3;E9PNX1;E9PK86;E9PMI5;E9PR70;E9PPV6	Serpin H1	P50454;E9PKH2	SERPINH1	21.3314	19.8747	20.7995	20.0505	20.2829	19.8158	20.5105	20.5464	20.2128			0.623498	0.237959	0.61884	1.53564
P28838;H0Y9Q1;H0Y983	Cytosol aminopeptidase	P28838;H0Y9Q1	LAP3	24.4583	24.5065	23.7062	23.6356	23.4387	23.735	23.5459	23.8002	23.7441			1.06703	0.0856978	0.620585	1.5375
Q9Y3B7;H0YCD5;E9PQB6	39S ribosomal protein L11, mitochondrial	Q9Y3B7	MRPL11	20.3286	20.5856	20.885	20.0044	19.4755	20.4555	19.7569	19.8253	19.8728			0.88908	0.129098	0.621219	1.53817
Q9BX68	Histidine triad nucleotide-binding protein 2, mitochondrial	Q9BX68	HINT2	21.0551	21.3248	21.8256	20.6627	20.2335	21.4427	20.569	19.5434	20.2714			0.672812	0.212416	0.622206	1.53923
B2R4S9;U3KQK0;Q99879;Q99877;Q93079;Q5QNW6;P62807;P58876;O60814;P57053;Q99880	Histone H2B;Histone H2B type 1-M;Histone H2B type 1-N;Histone H2B type 1-H;Histone H2B type 2-F;Histone H2B type 1-C/E/F/G/I;Histone H2B type 1-D;Histone H2B type 1-K;Histone H2B type F-S;Histone H2B type 1-L	B2R4S9;U3KQK0;Q99879;Q99877;Q93079;Q5QNW6;P62807;P58876;O60814;P57053;Q99880	HIST1H2BI;HIST1H2BN;HIST1H2BM;HIST1H2BH;HIST2H2BF;HIST1H2BC;HIST1H2BD;HIST1H2BK;H2BFS;HIST1H2BL	30.9131	31.1217	30.8158	30.5916	30.0488	30.3424	30.7014	30.5622	30.5969			1.58044	0.0262758	0.622608	1.53966
Q14980;A0A087WY61;H0YFY6;F5H6Y5;F5H4J1;K4DIE0;F5H1L0;F5GZW1;F5H2F3;F5H3L6;F5H0Z7;F5H763;F5GWK2;F5H073;F5H068;F8W6T3	Nuclear mitotic apparatus protein 1	Q14980;A0A087WY61;H0YFY6	NUMA1	23.0079	23.2018	22.7829	22.3472	22.4731	22.3044	23.1543	23.4735	23.5355			2.04589	0.00899728	0.622649	1.5397
A0A087X054;Q9Y4L1;E9PJ21;A0A087WWI4;K7EQK2;J3KTF1;Q9BST8;J3QQH7;J3QLE9;J3QL06;A0A087X214;A0A087WW13	Hypoxia up-regulated protein 1	A0A087X054;Q9Y4L1;E9PJ21;A0A087WWI4;K7EQK2	HYOU1	23.2555	23.6578	24.425	23.4928	22.4794	23.4862	24.2153	24.126	24.0978			0.581196	0.262303	0.626654	1.54398
E7EVX8;Q8WWY3;E7EU94;E7ESX0;E7EN72	U4/U6 small nuclear ribonucleoprotein Prp31	E7EVX8;Q8WWY3;E7EU94;E7ESX0;E7EN72	PRPF31	21.7334	21.5318	21.4575	21.5409	20.5328	20.7562	22.0212	21.5856	21.9745			0.931557	0.117069	0.630932	1.54857
P49748;G3V1M7;K7EJW8;J3QRJ8;K7EQP4;K7EMF8;J3KS89	Very long-chain specific acyl-CoA dehydrogenase, mitochondrial	P49748	ACADVL	23.1943	22.821	21.8884	21.8133	22.1432	22.039	22.0496	22.0453	21.821			0.727487	0.187289	0.636091	1.55411
Q5JRX3;A0A0A0MRX9;B1APQ0;H0Y4F7;H0Y7L7	Presequence protease, mitochondrial	Q5JRX3;A0A0A0MRX9	PITRM1	21.9856	22.2829	21.2125	21.2306	21.1389	21.1874	21.3513	21.0604	21.305			0.936804	0.115664	0.641335	1.55977
Q02880;E9PCY5	DNA topoisomerase 2-beta;DNA topoisomerase 2	Q02880;E9PCY5	TOP2B	21.5998	22.4323	21.4075	21.4898	20.8424	21.167	22.368	22.3532	22.2758			0.818711	0.151806	0.646771	1.56566
Q9UQE7	Structural maintenance of chromosomes protein 3	Q9UQE7	SMC3	20.8609	20.7975	21.0134	20.3551	19.9522	20.4223	21.859	21.7775	20.6924			1.80748	0.0155784	0.647398	1.56634
P40939;H0YFD6	Trifunctional enzyme subunit alpha, mitochondrial;Long-chain enoyl-CoA hydratase;Long chain 3-hydroxyacyl-CoA dehydrogenase	P40939	HADHA	26.1422	26.0992	25.7193	25.3799	25.3059	25.332	25.1955	25.1614	25.1318			2.04966	0.00891946	0.647599	1.56656
P40121;E7ENU9;H7C0X8;B8ZZL6	Macrophage-capping protein	P40121;E7ENU9	CAPG	22.3493	22.5627	23.8136	22.4502	21.5355	22.7894	23.3385	23.2656	23.358			0.477908	0.33273	0.650209	1.5694
A2A274;Q99798	Aconitate hydratase, mitochondrial	A2A274;Q99798	ACO2	25.9737	25.7783	25.3365	25.2015	24.8326	25.1032	25.1293	25.064	25.2814			1.38917	0.0408158	0.650347	1.56955
O43615;M0QXU7;M0QXM9;M0R301;M0R124	Mitochondrial import inner membrane translocase subunit TIM44	O43615;M0QXU7	TIMM44	22.8531	22.817	22.0064	21.7265	22.5187	21.4743	21.8427	21.7544	21.6401			0.711393	0.19436	0.652308	1.57168
Q9BSJ8;F8VZB1	Extended synaptotagmin-1	Q9BSJ8	ESYT1	23.6902	23.7102	24.2066	23.6974	22.567	23.3772	24.1817	24.2859	24.4351			0.804803	0.156746	0.65512	1.57475
Q9BYD6;H0Y8N7	39S ribosomal protein L1, mitochondrial	Q9BYD6;H0Y8N7	MRPL1	22.6561	22.0533	22.0747	21.4492	21.7866	21.5752	21.1705	19.3852	20.8276			1.39056	0.0406852	0.657733	1.5776
P19338;H7BY16;C9JYW2;C9JLB1;C9J1H7;C9JWL1	Nucleolin	P19338;H7BY16	NCL	27.8308	27.7807	27.5215	26.9313	26.9922	27.2316	27.5507	27.5619	27.6984			2.1167	0.00764366	0.659293	1.57931
Q09161;F2Z2T1	Nuclear cap-binding protein subunit 1	Q09161	NCBP1	21.3989	21.3904	21.3748	19.2997	21.2808	21.5886	21.4999	21.6381	21.7412			0.391148	0.406305	0.665029	1.5856
Q92522	Histone H1x	Q92522	H1FX	24.712	25.0578	23.681	23.3923	23.922	24.1288	24.0124	24.139	24.3458			0.645855	0.226019	0.669228	1.59022
P42677;Q5T4L4;H0YMV8;Q71UM5;C9J1C5;C9JLI6	40S ribosomal protein S27	P42677;Q5T4L4	RPS27	23.5118	23.297	24.3015	23.2728	22.8708	22.9504	23.8333	23.6557	23.4723			0.955657	0.11075	0.672089	1.59338
Q15691	Microtubule-associated protein RP/EB family member 1	Q15691	MAPRE1	21.6367	22.667	23.0793	22.2881	21.2978	21.7788	22.7838	22.0993	22.5463			0.581847	0.261911	0.672749	1.59411
P38117;M0QY67	Electron transfer flavoprotein subunit beta	P38117	ETFB	25.2855	25.547	24.7904	24.7312	24.2635	24.6062	24.0288	24.0692	24.1934			1.20792	0.0619554	0.673999	1.59549
Q13155;A8MU58;F8W950	Aminoacyl tRNA synthase complex-interacting multifunctional protein 2	Q13155;A8MU58;F8W950	AIMP2	21.4271	22.6508	23.1186	22.6037	20.603	21.965	23.2843	23.3708	23.1317			0.36291	0.4336	0.674943	1.59653
P62873;B1AKQ8;F6UT28;F6X3N5;B3KVK2;F5H8J8;F5H100;F5H0S8;E9PCP0;P16520	Guanine nucleotide-binding protein G(I)/G(S)/G(T) subunit beta-1	P62873;B1AKQ8;F6UT28	GNB1	22.7733	23.2706	24.1004	22.9149	22.2887	22.9148	23.2266	23.5819	23.337			0.700188	0.19944	0.675285	1.59691
P05387;H0YDD8	60S acidic ribosomal protein P2	P05387;H0YDD8	RPLP2	20.6518	20.5747	21.8651	20.9248	20.01	20.1284	21.4031	22.0294	21.787			0.596391	0.253285	0.676105	1.59782
PPIA_HUMAN;P62937;F8WE65;C9J5S7;P0DN26;A0A0H2UH34;A0A0B4J2A2;A0A075B767;A0A075B759;Q9Y536;F5H284;E5RIZ5;P0DN37	Peptidyl-prolyl cis-trans isomerase A;Peptidyl-prolyl cis-trans isomerase A, N-terminally processed;Peptidyl-prolyl cis-trans isomerase	PPIA_HUMAN;P62937;F8WE65;C9J5S7	PPIA	24.8157	26.0389	26.4971	25.426	24.8968	24.9956	25.8521	25.7473	25.896			0.571592	0.268169	0.677797	1.59969
E9PL69;P23921	Ribonucleoside-diphosphate reductase large subunit	E9PL69;P23921	RRM1	21.0305	21.3658	21.5776	21.3193	19.5542	21.0606	21.6574	21.6594	21.647			0.521445	0.300992	0.679935	1.60207
Q71UI9;P0C0S5;C9J0D1;C9J386	Histone H2A.V;Histone H2A.Z;Histone H2A	Q71UI9;P0C0S5;C9J0D1;C9J386	H2AFV;H2AFZ	23.3019	24.1136	23.6042	23.6604	22.5321	22.7831	23.6578	23.662	23.9341			0.752519	0.1768	0.681376	1.60367
P47929	Galectin-7	P47929	LGALS7	21.0685	23.8479	21.7671	21.7672	21.5213	21.3442	21.5452	21.2288	20.753			0.334181	0.463254	0.6836	1.60614
Q9NYY8	FAST kinase domain-containing protein 2	Q9NYY8	FASTKD2	22.0009	21.2304	21.3514	21.4789	21.3859	19.6649	20.8562	20.922	20.9734			0.464967	0.342794	0.684354	1.60698
Q99497;K7ELW0;K7EN27	Protein deglycase DJ-1	Q99497;K7ELW0;K7EN27	PARK7	21.32	21.4916	23.4434	21.49	21.3472	21.3634	21.1717	21.002	21.9793			0.428966	0.372421	0.684848	1.60753
G3XAG1;Q96ME7	Zinc finger protein 512	G3XAG1;Q96ME7	ZNF512	20.1769	21.462	21.7224	21.0733	19.9514	20.2523	21.4436	21.1667	20.7873			0.523294	0.299714	0.694738	1.61859
P38646;D6RJI2;D6RA73;H0YBG6;H0Y8S0	Stress-70 protein, mitochondrial	P38646	HSPA9	28.6325	28.8988	28.5162	28.0565	27.9099	27.9939	27.9752	28.0906	28.2463			2.34402	0.00452877	0.695693	1.61966
Q93077;Q7L7L0;P04908	Histone H2A type 1-C;Histone H2A type 3;Histone H2A type 1-B/E	Q93077;Q7L7L0;P04908	HIST1H2AC;HIST3H2A;HIST1H2AB	24.1219	25.2731	24.8242	24.8458	23.1542	24.1288	25.3993	25.12	25.1546			0.514739	0.305675	0.69679	1.62089
Q6DD88;F5H6I7;F5GWF8	Atlastin-3	Q6DD88;F5H6I7	ATL3	22.7443	23.1647	22.5667	22.0267	21.8795	22.4728	22.7184	23.2959	23.6737			1.30216	0.0498699	0.698924	1.62329
O95864	Fatty acid desaturase 2	O95864	FADS2	20.6762	22.2624	21.8599	19.4717	21.6864	21.5363	21.5013	21.5182	22.0803			0.337392	0.459842	0.701394	1.62608
O76021;J3QSV6;I3L3C4;I3L234;I3L3U9	Ribosomal L1 domain-containing protein 1	O76021;J3QSV6	RSL1D1	23.5548	23.5318	22.9438	22.3998	22.7123	22.7961	23.0287	23.1371	23.218			1.41128	0.0387901	0.707445	1.63291
Q92621;U3KPX2	Nuclear pore complex protein Nup205	Q92621	NUP205	20.2147	22.2384	20.5641	20.2901	20.4375	20.1477	20.4261	21.2497	20.6395			0.494178	0.320496	0.713951	1.64029
P24752;H0YEL7;E9PRQ6;E9PKF3	Acetyl-CoA acetyltransferase, mitochondrial	P24752;H0YEL7	ACAT1	24.083	24.0247	24.0048	23.5283	23.3947	23.0409	23.4305	23.6985	23.5068			2.08304	0.00825959	0.716218	1.64287
P23528;G3V1A4;E9PP50;E9PK25;E9PQB7;E9PLJ3;E9PS23;Q9Y281	Cofilin-1	P23528;G3V1A4;E9PP50;E9PK25;E9PQB7;E9PLJ3;E9PS23	CFL1	24.1906	25.0896	25.7072	24.7111	24.1405	23.9813	25.2699	24.6664	24.3655			0.659898	0.218828	0.718194	1.64512
Q9NUB1	Acetyl-coenzyme A synthetase 2-like, mitochondrial	Q9NUB1	ACSS1	23.4522	22.6664	22.7002	22.2022	22.0664	22.3698	21.8877	22.2023	22.0719			1.25825	0.0551761	0.726803	1.65497
Q8TD19	Serine/threonine-protein kinase Nek9	Q8TD19	NEK9	21.2408	21.5374	20.9322	19.4851	21.6266	20.4169	21.116	21.2274	21.5258			0.492195	0.321962	0.727262	1.65549
P22033	Methylmalonyl-CoA mutase, mitochondrial	P22033	MUT	22.6672	22.7764	22.0029	21.4173	21.7822	22.0528	21.1128	21.1553	21.3375			1.13218	0.0737605	0.731431	1.66029
Q4G176;F5H755;F5H5A1;F5H362;H0YGC7;F5H3B2;F5H2G6;H0YH37;F5GX20	Acyl-CoA synthetase family member 3, mitochondrial	Q4G176;F5H755;F5H5A1;F5H362;H0YGC7	ACSF3	24.0182	23.7423	22.5339	22.2352	23.0655	22.7706	22.1192	21.6563	21.7581			0.648419	0.224689	0.741046	1.67139
Q9NZZ3	Charged multivesicular body protein 5	Q9NZZ3	CHMP5	19.1778	21.6133	21.5996	19.5558	21.1936	19.3961	18.8533	18.5049	19.8749			0.307295	0.492838	0.748395	1.67992
Q8IYB8	ATP-dependent RNA helicase SUPV3L1, mitochondrial	Q8IYB8	SUPV3L1	22.9767	22.6961	22.0501	22.0442	21.3996	22.0159	21.3141	21.9031	22.0563			1.02466	0.0944798	0.754406	1.68694
O15355	Protein phosphatase 1G	O15355	PPM1G	21.7032	21.8082	22.0778	21.675	19.3507	22.2879	22.3224	22.2156	22.5033			0.349197	0.44751	0.758492	1.69172
P13804;H0YLU7;H0YK49;H0YL12;H0YKF0;H0YNX6;J3KN60;H0YL83	Electron transfer flavoprotein subunit alpha, mitochondrial	P13804;H0YLU7;H0YK49;H0YL12;H0YKF0;H0YNX6	ETFA	24.3337	24.4282	23.7718	23.5463	23.1543	23.5556	23.2717	23.3902	23.4881			1.44676	0.0357469	0.759213	1.69257
P04591		P04591		23.2908	25.568	24.8172	23.6194	23.3691	24.4094	22.0065	21.2729	21.2412			0.440553	0.362616	0.75937	1.69275
O75439;G3V0E4;F8WEA6;F8WBE1;F8WAZ6	Mitochondrial-processing peptidase subunit beta	O75439;G3V0E4	PMPCB	24.1639	23.9278	23.862	23.1898	23.2091	23.2691	22.583	22.5099	22.584			2.88708	0.00129695	0.761888	1.69571
A0A087WZN1;O43837;A0A087X2E5;A0A0D9SG66	Isocitrate dehydrogenase [NAD] subunit, mitochondrial;Isocitrate dehydrogenase [NAD] subunit beta, mitochondrial	A0A087WZN1;O43837;A0A087X2E5	IDH3B	23.9827	23.6382	23.5807	22.7352	23.1706	22.9976	22.1685	22.0104	22.0645			1.89727	0.0126686	0.766086	1.70065
Q9NVI7;H0Y2W2;Q5T9A4;Q5T2N8;Q5SV16;J3QSF3	ATPase family AAA domain-containing protein 3A;ATPase family AAA domain-containing protein 3B	Q9NVI7;H0Y2W2;Q5T9A4	ATAD3A;ATAD3B	23.6393	23.831	23.3415	22.9976	22.6306	22.8777	23.5988	23.6616	23.3288			1.8981	0.0126444	0.768635	1.70366
Q9UBS4;H7C2Y5	DnaJ homolog subfamily B member 11	Q9UBS4	DNAJB11	21.5763	20.6598	21.8467	19.8553	21.4192	20.4927	20.5783	19.8342	19.9393			0.596413	0.253272	0.771899	1.70752
Q5SSJ5;X6RGJ2;B0QZK4;Q5SWC8;B0QZK9;B0QZK8	Heterochromatin protein 1-binding protein 3	Q5SSJ5;X6RGJ2;B0QZK4;Q5SWC8	HP1BP3	25.0542	24.4858	24.5353	24.0258	23.9209	23.7965	24.0801	23.9409	24.3774			1.79901	0.0158853	0.777388	1.71402
P21912;A0A087WXX8;A0A087WWT1	Succinate dehydrogenase [ubiquinone] iron-sulfur subunit, mitochondrial	P21912;A0A087WXX8;A0A087WWT1	SDHB	21.4842	21.6574	21.3489	20.8458	20.4737	20.8193	21.4161	21.0159	21.6799			2.19956	0.00631597	0.783929	1.72181
A0A024RA52;P25787;H3BT36;C9JCK5	Proteasome subunit alpha type;Proteasome subunit alpha type-2	A0A024RA52;P25787	PSMA2	21.7161	21.3836	21.5278	21.3988	21.9614	18.8991	21.7893	21.787	21.5126			0.345843	0.45098	0.789387	1.72834
O43765;K7EMD6	Small glutamine-rich tetratricopeptide repeat-containing protein alpha	O43765;K7EMD6	SGTA	21.2674	19.9194	21.4588	20.1131	20.7144	19.4495	20.145	20.2164	19.9312			0.580004	0.263024	0.789539	1.72852
Q9BRZ2;C9JI91	E3 ubiquitin-protein ligase TRIM56	Q9BRZ2	TRIM56	20.0542	20.8738	20.88	19.7131	19.875	19.8389	18.9184	18.9727	18.6627			1.33294	0.0464575	0.793667	1.73348
E9PHM2;Q15031	Probable leucine--tRNA ligase, mitochondrial	E9PHM2;Q15031	LARS2	20.6268	21.638	20.7416	20.0872	19.9994	20.5287	20.1268	21.5193	20.1981			1.04239	0.0907007	0.797063	1.73756
C9JDR0;Q15738	Sterol-4-alpha-carboxylate 3-dehydrogenase, decarboxylating	C9JDR0;Q15738	NSDHL	21.5573	22.4541	21.6139	20.0777	21.39	21.7345	20.3129	20.2726	20.4576			0.624206	0.237571	0.807686	1.7504
Q5W0H4;A0A0B4J2C3;P13693;J3KPG2;E9PJF7;H0YCX0	Translationally-controlled tumor protein	Q5W0H4;A0A0B4J2C3;P13693;J3KPG2;E9PJF7	TPT1	20.7636	20.9355	22.3812	21.0727	19.6456	20.9048	20.3475	21.2248	21.2388			0.528159	0.296375	0.819047	1.76424
Q01469;I6L8B7;A8MUU1	Fatty acid-binding protein, epidermal	Q01469;I6L8B7	FABP5	21.2606	21.3007	22.4236	21.1591	19.9477	21.4047	21.6564	23.2747	20.9311			0.629294	0.234804	0.824481	1.7709
Q12931;I3L0K7;I3L239	Heat shock protein 75 kDa, mitochondrial	Q12931;I3L0K7	TRAP1	25.9052	25.9712	25.2087	24.8122	24.932	24.8623	24.7634	24.8957	24.879			1.54541	0.0284835	0.826197	1.77301
P25398	40S ribosomal protein S12	P25398	RPS12	22.1154	22.6331	24.0648	22.4795	21.7757	22.0772	22.9398	23.1696	22.8897			0.599242	0.251627	0.826934	1.77391
Q99661;Q5JR89;Q5JR91;H0Y5Z9	Kinesin-like protein KIF2C;Kinesin-like protein	Q99661;Q5JR89;Q5JR91	KIF2C	21.5401	21.6522	20.9551	21.4658	20.0528	20.0385	21.3576	21.7362	21.6171			0.7634	0.172425	0.863427	1.81935
O95782;A0A0G2JQM1	AP-2 complex subunit alpha-1	O95782	AP2A1	21.8106	20.5769	20.4239	20.1541	20.5837	19.4776	20.2599	21.2699	21.2096			0.727842	0.187136	0.865295	1.82171
P61313;E7EQV9;E7ENU7;E7EX53;E7ERA2	60S ribosomal protein L15;Ribosomal protein L15	P61313;E7EQV9;E7ENU7;E7EX53	RPL15	26.5463	26.1556	25.8304	25.1871	25.6616	25.0685	24.6334	24.7482	25.2601			1.46996	0.0338875	0.871719	1.82984
P48735;H0YL11;C9J4N6	Isocitrate dehydrogenase [NADP], mitochondrial	P48735	IDH2	27.3995	27.1209	27.1089	26.3321	26.4219	26.2381	25.8851	26.0257	26.0728			2.89512	0.00127314	0.879084	1.83921
A0A087WVM4;B7ZM99;Q6UB35;Q4VXM0;H0Y327;Q4VXM1;Q4VXV2	Monofunctional C1-tetrahydrofolate synthase, mitochondrial	A0A087WVM4;B7ZM99;Q6UB35	MTHFD1L	24.8804	24.8774	24.2925	23.6362	23.7612	23.9884	23.6558	23.6435	23.6443			1.79923	0.0158772	0.888138	1.85079
P51398;V9GYL9;V9GZ03;V9GYJ9;V9GYF7;V9GZ61;V9GYJ3;V9GYW1;V9GY11;V9GYA7	28S ribosomal protein S29, mitochondrial	P51398;V9GYL9;V9GZ03;V9GYJ9	DAP3	21.7321	21.5099	20.8274	21.2376	20.4411	19.7127	21.0293	20.7533	21.2174			0.796597	0.159736	0.892664	1.8566
Q96I99;H0Y852;E9PDQ8	Succinyl-CoA ligase [GDP-forming] subunit beta, mitochondrial	Q96I99;H0Y852;E9PDQ8	SUCLG2	23.1784	23.5054	22.91	22.2723	22.261	22.3522	22.2435	21.8706	22.2269			2.17765	0.00664273	0.902772	1.86966
Q14761	Protein tyrosine phosphatase receptor type C-associated protein	Q14761	PTPRCAP	22.2963	20.3475	21.4481	20.411	20.7577	20.161	21.37	20.1283	20.666			0.712916	0.19368	0.920723	1.89306
P54886	Delta-1-pyrroline-5-carboxylate synthase;Glutamate 5-kinase;Gamma-glutamyl phosphate reductase	P54886	ALDH18A1	25.0857	25.1927	24.6644	23.9942	23.9609	24.2231	24.0865	24.049	24.1923			2.15267	0.00703607	0.921537	1.89413
Q9NPJ3	Acyl-coenzyme A thioesterase 13;Acyl-coenzyme A thioesterase 13, N-terminally processed	Q9NPJ3	ACOT13	20.4819	21.3931	22.0383	18.7687	20.3612	22.0066	20.7935	21.2671	20.7512			0.3737	0.422961	0.925625	1.89951
Q99714;Q5H928	3-hydroxyacyl-CoA dehydrogenase type-2	Q99714;Q5H928	HSD17B10	25.6524	26.0084	25.6054	25.1822	24.5009	24.8052	24.7876	24.8495	24.7061			1.77341	0.0168497	0.925975	1.89997
Q9NZL9;H7C0X7;E5RJR3	Methionine adenosyltransferase 2 subunit beta	Q9NZL9;H7C0X7	MAT2B	22.0474	19.4169	21.7209	20.141	20.106	20.1471	21.8135	22.137	21.0214			0.489455	0.324	0.930354	1.90574
P04792;F8WE04;C9J3N8	Heat shock protein beta-1	P04792;F8WE04	HSPB1	20.9336	23.5839	20.7401	20.9917	20.6677	20.7002	24.1665	22.3052	19.8563			0.450449	0.354447	0.965994	1.95341
H0YKV0;H0YLC3;H7C4G6;A0A0A0MT83;P26440;H0YN10	Isovaleryl-CoA dehydrogenase, mitochondrial	H0YKV0;H0YLC3;H7C4G6;A0A0A0MT83;P26440;H0YN10	IVD	20.8921	21.1378	20.9422	20.2563	19.8017	19.9969	20.8719	20.1273	21.7576			2.51866	0.00302932	0.972401	1.9621
M0QXB5;O95571;M0QY80	Persulfide dioxygenase ETHE1, mitochondrial	M0QXB5;O95571	ETHE1	21.7247	22.8237	21.577	21.2347	20.8735	21.098	20.9538	21.0236	18.8683			1.124	0.0751619	0.973057	1.963
Q9BPW8;H7C2U6;C9JDV8	Protein NipSnap homolog 1	Q9BPW8;H7C2U6	NIPSNAP1	21.5425	22.0084	21.4381	21.24	20.6061	20.2004	21.4553	21.2708	21.3466			1.3138	0.0485509	0.980844	1.97362
F5H5D3;Q9BQE3	Tubulin alpha-1C chain	F5H5D3;Q9BQE3	TUBA1C	20.9242	21.2807	22.5861	20.409	21.2099	20.2135	21.4925	21.6317	21.3339			0.769708	0.169938	0.986165	1.98091
Q14690	Protein RRP5 homolog	Q14690	PDCD11	21.995	21.7358	20.8623	19.669	21.8982	20.0415	20.8978	20.5486	20.7747			0.575303	0.265887	0.994801	1.99281
P37802;X6RJP6;C9J5W6;Q9UI15	Transgelin-2	P37802;X6RJP6	TAGLN2	20.4292	21.5142	23.1888	21.2282	20.6162	20.2534	21.8853	21.3483	21.0212			0.521946	0.300645	1.01147	2.01596
P30048	Thioredoxin-dependent peroxide reductase, mitochondrial	P30048	PRDX3	22.3735	23.2895	23.0499	22.5898	21.4925	21.5928	22.4257	22.5146	22.8292			1.06989	0.085135	1.0126	2.01754
Q9NQS7;E9PM67	Inner centromere protein	Q9NQS7;E9PM67	INCENP	21.0044	21.0013	21.0681	20.3193	19.3469	20.3691	21.17	20.8697	21.0741			1.41454	0.0384996	1.01283	2.01787
P30038;Q5TF55	Delta-1-pyrroline-5-carboxylate dehydrogenase, mitochondrial	P30038	ALDH4A1	22.1355	21.2075	21.8225	20.7958	20.7667	20.5592	20.0134	20.537	20.3941			1.63925	0.0229485	1.01462	2.02037
P49411;H3BNU3	Elongation factor Tu, mitochondrial	P49411	TUFM	27.2215	27.5601	27.067	26.3404	26.1842	26.2772	25.9971	25.7549	25.7453			2.57828	0.00264069	1.01557	2.02171
M0QWZ7;Q9NP81;M0R2C6;M0QX29;B4DJM9;M0R259;M0R1C0;M0R2H5	Serine--tRNA ligase, mitochondrial	M0QWZ7;Q9NP81;M0R2C6;M0QX29;B4DJM9;M0R259	SARS2	22.4472	21.559	21.5338	20.7107	20.7141	21.0652	20.6542	20.5847	20.4795			1.46282	0.034449	1.01669	2.02327
E9PF18;A0A0A0MSE2;Q16836	Hydroxyacyl-coenzyme A dehydrogenase, mitochondrial	E9PF18;A0A0A0MSE2;Q16836	HADH	22.4521	21.9129	22.2591	20.2125	21.8142	21.5427	22.4397	22.5627	21.8619			0.915393	0.121508	1.01824	2.02544
O75323;H7C333;C9J7B1;C9K068	Protein NipSnap homolog 2	O75323;H7C333	GBAS	22.6617	22.3413	22.6156	21.3698	21.2806	21.9124	21.51	21.5989	21.8166			1.99947	0.0100122	1.01858	2.02592
G5E9W7;G5E9V5;P82650;H7C5F2;H7C5H3	28S ribosomal protein S22, mitochondrial	G5E9W7;G5E9V5;P82650;H7C5F2;H7C5H3	MRPS22	21.473	21.7227	21.2238	21.0645	20.087	20.1913	20.7565	20.096	20.762			1.39898	0.0399047	1.02556	2.03575
Q9BXW7;A8MYZ9	Cat eye syndrome critical region protein 5	Q9BXW7	CECR5	20.5196	21.2938	20.9347	19.3553	19.8102	20.4969	19.2291	20.3866	20.8211			1.20799	0.0619461	1.02858	2.04002
K7EJE8;K7EKE6;P36776;K7ER27;K7ER56;K7ERR6;K7EQF8	Lon protease homolog, mitochondrial	K7EJE8;K7EKE6;P36776	LONP1	26.8954	26.9058	26.5098	25.8166	25.8372	25.4931	25.656	25.2775	25.5475			2.45081	0.00354149	1.05469	2.07727
A0A0C4DFV9;A0A087X027;Q01105;P0DME0	Protein SET;Protein SETSIP	A0A0C4DFV9;A0A087X027;Q01105;P0DME0	SET;SETSIP	21.137	20.9962	22.1857	20.2842	20.6637	20.1949	18.3502	20.6921	20.972			1.23735	0.0578964	1.05873	2.08309
Q9P2R7;Q5T9Q5;Q5T9Q8;A0A0U1RQL1;A0A0U1RRI1;A0A0U1RQF8;A0A0U1RQU7	Succinyl-CoA ligase [ADP-forming] subunit beta, mitochondrial	Q9P2R7;Q5T9Q5	SUCLA2	24.3408	24.0733	23.7979	22.8388	23.0486	23.1157	23.1269	22.9469	22.8516			2.41756	0.00382335	1.06966	2.09894
S4R456;K7EM56;A0A0B4J2B4;K7EJ78;S4R417;K7EQJ5;K7ELC2;P62841	40S ribosomal protein S15	S4R456;K7EM56;A0A0B4J2B4;K7EJ78;S4R417;K7EQJ5;K7ELC2;P62841	RPS15	21.8975	20.7035	22.3728	20.6461	20.9876	20.1259	22.0148	22.62	22.0986			0.898505	0.126327	1.07143	2.10152
P35659;D6R9L5;B4DFG0;D6RDA2;H0Y993	Protein DEK	P35659;D6R9L5;B4DFG0	DEK	22.4849	22.7452	22.3352	20.9424	21.599	21.8077	21.7596	22.6281	22.9408			1.69508	0.0201798	1.07211	2.10251
A0A0A0MTN9;J3QQX3;A0A0A0MTR6;A0A0C4DFN8;A0A0C4DGN7;A0A0A0MSZ4;A0A0A0MT64;P22570;J3QKZ8	NADPH:adrenodoxin oxidoreductase, mitochondrial	A0A0A0MTN9;J3QQX3;A0A0A0MTR6;A0A0C4DFN8;A0A0C4DGN7;A0A0A0MSZ4;A0A0A0MT64;P22570	FDXR	22.0933	21.9996	20.7999	20.6206	20.5075	20.533	20.709	20.4434	20.215			1.21166	0.0614245	1.07725	2.11001
G8JLH9;P40763	Signal transducer and activator of transcription;Signal transducer and activator of transcription 3	G8JLH9;P40763	STAT3	21.7569	22.5466	20.2019	20.9091	20.555	19.7486	21.9912	20.9605	20.9447			0.643999	0.226987	1.09755	2.13992
Q02252;G3V4Z4	Methylmalonate-semialdehyde dehydrogenase [acylating], mitochondrial	Q02252;G3V4Z4	ALDH6A1	21.854	23.4827	21.6375	21.3828	20.8412	21.4069	21.328	19.4123	20.923			0.847082	0.142206	1.11441	2.16506
Q13547	Histone deacetylase 1	Q13547	HDAC1	21.676	22.4344	22.2225	21.9363	18.3381	22.7062	22.6896	22.9767	22.6435			0.338232	0.458953	1.11746	2.16964
P52566;F5H3P3;F5H6Q0;H0YGX7;F5H2R5	Rho GDP-dissociation inhibitor 2	P52566;F5H3P3;F5H6Q0;H0YGX7;F5H2R5	ARHGDIB	23.7044	23.9224	24.7525	24.2157	21.3221	23.4472	24.3137	24.0637	24.6209			0.54177	0.28723	1.13143	2.19075
O75947;F5H608	ATP synthase subunit d, mitochondrial	O75947;F5H608	ATP5H	19.5703	20.7716	23.5456	20.2583	20.8002	19.4261	19.7412	20.3384	20.2034			0.383888	0.413154	1.13426	2.19506
B7Z9I1;Q5T4U5;P11310;E9PJM9;H0YDT5;E9PRX4	Medium-chain specific acyl-CoA dehydrogenase, mitochondrial	B7Z9I1;Q5T4U5;P11310	ACADM	25.9532	26.1793	25.5711	24.8639	24.7098	24.6795	24.2037	24.2244	24.4756			2.45513	0.00350644	1.15011	2.21932
A0A0G2JRI7;A0A0G2JQ62;Q8NF37	Lysophosphatidylcholine acyltransferase 1	A0A0G2JRI7;A0A0G2JQ62;Q8NF37	LPCAT1	22.8986	19.8155	19.8751	19.3159	19.5111	20.2706	19.9632	20.2446	20.8535			0.477092	0.333356	1.16387	2.24057
H0YL72;P50213;H0YLI6;H0YMU3;H0YM46;H0YNF5;H0YKD0;H0YM64	Isocitrate dehydrogenase [NAD] subunit alpha, mitochondrial	H0YL72;P50213;H0YLI6;H0YMU3	IDH3A	24.3421	24.4694	23.8875	22.8692	23.2245	23.0691	22.9414	22.7753	22.8988			2.34832	0.00448419	1.17875	2.26381
O00232;J3KTJ5;J3KSK1	26S proteasome non-ATPase regulatory subunit 12	O00232	PSMD12	22.446	20.3267	20.5704	20.3161	19.1539	20.3168	20.9048	20.6747	21.5299			0.69859	0.200175	1.18546	2.27436
K2M3_SHEEP		K2M3_SHEEP		20.9794	22.2308	20.7404	19.9719	19.8981	20.473	20.7768	20.2581	24.6444			1.13985	0.0724679	1.20255	2.30146
P04181	Ornithine aminotransferase, mitochondrial;Ornithine aminotransferase, hepatic form;Ornithine aminotransferase, renal form	P04181	OAT	21.8856	22.0827	21.6615	20.9598	20.5539	20.431	20.3796	20.6745	18.7258			2.44158	0.00361764	1.22831	2.34292
P26583;D6R9A6	High mobility group protein B2	P26583;D6R9A6	HMGB2	22.1164	22.2489	23.5788	21.6588	21.5976	20.9719	23.1122	23.1735	22.8592			1.12896	0.0743094	1.23858	2.35966
O76031;H0YM48;H0YK07	ATP-dependent Clp protease ATP-binding subunit clpX-like, mitochondrial	O76031	CLPX	24.8422	24.7182	24.3061	22.8616	23.5764	23.6194	23.0507	23.019	23.169			1.90269	0.0125115	1.26974	2.41118
E7ETZ4;Q9Y6E2;E9PFD4;B5MCE7;Q75MG1;B5MCH7;E9PFE3;C9JF98;F8WDX8;E7EMS9	Basic leucine zipper and W2 domain-containing protein 2	E7ETZ4;Q9Y6E2;E9PFD4;B5MCE7;Q75MG1;B5MCH7	BZW2	22.202	20.4819	21.8296	20.4119	20.7003	19.5568	22.318	21.8041	21.9774			0.959719	0.109719	1.28151	2.43093
P43487;C9JJ34;F6WQW2;C9JXG8;C9JGV6;C9JDM3;C9JIC6	Ran-specific GTPase-activating protein	P43487;C9JJ34;F6WQW2;C9JXG8;C9JGV6	RANBP1	22.4122	22.4215	22.3517	21.8528	21.9308	19.517	22.9541	23.0492	22.993			0.750876	0.17747	1.29497	2.45372
P53597;H7C233	Succinyl-CoA ligase [ADP/GDP-forming] subunit alpha, mitochondrial	P53597	SUCLG1	23.6434	22.9791	23.0053	21.7508	21.9878	21.9177	22.1987	21.9689	21.9885			2.35681	0.00439732	1.32383	2.50329
Q10570	Cleavage and polyadenylation specificity factor subunit 1	Q10570	CPSF1	22.1754	20.6226	22.3499	20.9872	21.0429	19.0084	21.0239	20.7639	20.9928			0.724332	0.188655	1.36983	2.5844
Q5JTZ9	Alanine--tRNA ligase, mitochondrial	Q5JTZ9	AARS2	24.4923	24.4677	24.3128	22.2447	23.8196	23.0855	21.9239	21.9819	21.9611			1.39768	0.0400236	1.37438	2.59257
I3L397;I3L504;P63241;Q6IS14;F8WCJ1;C9J7B5;C9J4W5;Q9GZV4	Eukaryotic translation initiation factor 5A;Eukaryotic translation initiation factor 5A-1;Eukaryotic translation initiation factor 5A-1-like;Eukaryotic translation initiation factor 5A-2	I3L397;I3L504;P63241;Q6IS14;F8WCJ1;C9J7B5;C9J4W5;Q9GZV4	EIF5A;EIF5AL1;EIF5A2	21.8319	21.9499	24.0358	21.1602	20.3359	22.1601	22.5479	22.5891	21.8793			0.712789	0.193736	1.38715	2.61562
F8W020;F8VY35;F8W0J6;F5H4R6;H0YIV4;P55209;H0YHC3;F8W118;F8VXI6;F8VUX1;F8VV59;B7Z9C2;F8VRJ2;F8VVB5;H0YH88;F8W543	Nucleosome assembly protein 1-like 1	F8W020;F8VY35;F8W0J6;F5H4R6;H0YIV4;P55209;H0YHC3;F8W118;F8VXI6;F8VUX1;F8VV59;B7Z9C2;F8VRJ2;F8VVB5;H0YH88;F8W543	NAP1L1	22.2734	21.6858	23.7368	21.4385	20.2637	21.8249	22.1173	21.6388	21.9787			0.837841	0.145264	1.38962	2.6201
CATG_HUMAN;P08311	Cathepsin G	CATG_HUMAN;P08311	CTSG	22.0258	22.6145	21.4848	20.8556	20.162	20.9173	19.0199	19.118	20.7735			1.57933	0.0263432	1.39674	2.63306
P12236;Q9H0C2	ADP/ATP translocase 3;ADP/ATP translocase 3, N-terminally processed	P12236	SLC25A6	23.7532	23.7435	23.6049	23.6067	19.2755	23.9116	23.6285	23.5729	24.1289			0.406681	0.39203	1.43594	2.70559
SRPP_HEVBR		SRPP_HEVBR		22.1666	24.4524	20.0944	19.9904	21.4389	20.8654	18.9258	21.4117	23.334			0.482414	0.329296	1.47289	2.77578
P10768;U3KQT1;H7BZT7;X6RA14	S-formylglutathione hydrolase	P10768;U3KQT1;H7BZT7;X6RA14	ESD	23.1475	22.5676	23.419	22.4954	19.8971	22.2468	22.4898	22.4847	22.6945			0.800499	0.158307	1.49825	2.825
A0A087WV66;P46013	Antigen KI-67	A0A087WV66;P46013	MKI67	23.1196	23.5614	22.5556	21.3755	21.6234	21.6514	22.2894	22.4113	21.9005			2.1344	0.00733842	1.52878	2.88542
P11177;C9J634;F8WF02	Pyruvate dehydrogenase E1 component subunit beta, mitochondrial	P11177;C9J634	PDHB	23.5465	23.3076	23.0366	21.496	22.0721	21.5712	21.0393	21.1119	21.2949			2.60998	0.00245482	1.58382	2.99762
P09622;E9PEX6;F8WDM5;F2Z2E3	Dihydrolipoyl dehydrogenase, mitochondrial;Dihydrolipoyl dehydrogenase	P09622;E9PEX6	DLD	21.0893	22.1243	22.9877	21.9671	19.8395	19.5528	21.8518	22.4668	22.2444			0.794126	0.160647	1.61394	3.06086
REF_HEVBR		REF_HEVBR		22.8008	23.8221	19.4435	19.8409	20.3981	20.882	19.354	19.7773	22.5386			0.536006	0.291068	1.64843	3.13493
Q9BWF3;E9PB51;Q9BQ04;E9PLB0;E9PM61;D6R9K7;U3KQD5;J3QRR5	RNA-binding protein 4;RNA-binding protein 4B	Q9BWF3;E9PB51;Q9BQ04	RBM4;RBM4B	20.9059	21.7177	21.6345	19.5327	20.3109	18.8075	20.8596	22.2342	21.3957			1.68188	0.0208025	1.86902	3.65285
U3KQ56;Q9UBQ7	Glyoxylate reductase/hydroxypyruvate reductase	U3KQ56;Q9UBQ7	GRHPR	21.4561	22.0623	22.467	21.1569	18.3559	20.6993	21.9045	21.5123	22.2543			0.984976	0.10352	1.92444	3.79589
Q9UKD2	mRNA turnover protein 4 homolog	Q9UKD2	MRTO4	21.0457	23.112	23.4903	19.7597	21.4274	20.4008	23.0558	20.6596	23.1369			1.05258	0.0885979	2.02005	4.05598
Q01546;H0YID6;B4DIR1;F8VQY3;K7ELP4;K7EKH9;CON__REFSEQ:XP_932229	Keratin, type II cytoskeletal 2 oral	Q01546	KRT76	21.0104	27.3766	18.4142	19.9606	20.6371	19.5852	25.7759	20.6069	18.3868			0.340392	0.456676	2.20612	4.61431

## Sheet: USvsCS_PerseusOutput
Protein IDs	Protein names	Majority protein IDs	Gene names	LFQ intensity US Bio1	LFQ intensity US Bio2	LFQ intensity US Bio3	LFQ intensity PS Bio1	LFQ intensity PS Bio2	LFQ intensity PS Bio3	LFQ intensity CS Bio1	LFQ intensity CS Bio2	LFQ intensity CS Bio3	Student's T-test Significant FL_CS	Student's T-test significant	(-)Log Student's T-test p-value	US vs CS Student's T-test p-value	Student's T-test Difference US vs CS	Fold Difference (US vs CS)
O00487	26S proteasome non-ATPase regulatory subunit 14	O00487	PSMD14	20.711	20.7894	20.1973	20.5336	20.3122	21.7221	22.9553	23.1252	23.192	+	CS	3.65668	0.000220456	-2.52495	0.173745
Q13595	Transformer-2 protein homolog alpha	Q13595	TRA2A	20.9471	20.3114	22.6287	23.6737	23.6838	23.6538	23.0413	23.0848	23.1604	+	CS	1.2216	0.0600344	-1.79977	0.28722
O96019;C9JQT2;H7C5S0	Actin-like protein 6A	O96019	ACTL6A	19.8827	20.2433	20.0265	21.7556	22.3336	23.3138	21.7235	21.5269	21.9095	+	CS	3.40504	0.000393516	-1.66917	0.314435
Q7Z3B4	Nucleoporin p54	Q7Z3B4	NUP54	18.7052	19.9646	19.3365	20.415	22.2183	20.5681	20.7127	20.5555	20.5339	+	CS	1.57987	0.0263104	-1.26526	0.416024
Q969V3;K7EMW4;K7ELZ9;K7ENM2;A0A0C4DGP7;K7EQ66	Nicalin	Q969V3;K7EMW4	NCLN	21.3285	21.2862	21.2467	21.844	22.3346	21.5461	22.1705	22.5723	22.7301	+	CS	2.69486	0.00201902	-1.20381	0.434126
K7EJL1;Q9BXS5;E7ENJ6;K7EK69;K7ERH5;K7EL08;K7EQX3;Q9Y6Q5	AP-1 complex subunit mu-1	K7EJL1;Q9BXS5;E7ENJ6	AP1M1	19.2564	19.5031	19.4397	20.8388	20.9988	20.3705	20.928	20.0393	20.6425	+	CS	1.85519	0.0139574	-1.13683	0.454759
P0DN76;Q01081;M0QYK5;M0R2N4;Q8WU68;K7EJH3;K7EJM7	Splicing factor U2AF 35 kDa subunit	P0DN76;Q01081	U2AF1	20.3412	20.3404	21.2672	21.5354	21.2886	20.0824	21.9959	21.6991	21.5955	+	CS	1.54901	0.0282482	-1.11389	0.462047
Q9Y678;H0Y8X7;H0Y8G2	Coatomer subunit gamma-1	Q9Y678	COPG1	21.683	22.0751	22.6123	22.3956	22.0434	22.4024	23.3514	23.1644	23.099	+	CS	1.74322	0.0180624	-1.08149	0.472541
P61586	Transforming protein RhoA	P61586	RHOA	21.2483	21.0523	21.1109	20.8848	20.88	21.4586	22.2667	22.1302	22.245	+	CS	3.9366	0.000115719	-1.07684	0.474067
Q8WY22	BRI3-binding protein	Q8WY22	BRI3BP	19.4329	19.5702	19.5647	22.0117	22.1053	22.6407	20.4682	20.595	20.7258	+	CS	3.60927	0.000245887	-1.0737	0.475099
P40938;A0A087X270	Replication factor C subunit 3	P40938	RFC3	19.2174	19.7232	19.2562	20.5291	21.9996	22.3249	20.7005	20.6868	19.9654	+	CS	1.64305	0.0227485	-1.05194	0.482318
Q8TCT9;A0A075B6F6;A0A0C4DGU3	Minor histocompatibility antigen H13	Q8TCT9;A0A075B6F6	HM13	20.3786	20.7463	20.9934	20.7535	20.88	21.2961	21.8233	21.8599	21.5148	+	CS	2.09463	0.00804207	-1.02657	0.490875
Q9BVK6	Transmembrane emp24 domain-containing protein 9	Q9BVK6	TMED9	21.0097	21.4275	21.6318	22.1263	21.2583	21.6543	22.3851	22.1585	22.4916	+	CS	2.05003	0.00891188	-0.988728	0.503922
O14929;F8W9G7;F8WEW1	Histone acetyltransferase type B catalytic subunit	O14929	HAT1	21.7022	21.9193	22.1769	22.1476	22.0996	22.2769	22.8146	22.9797	22.8969	+	CS	2.57339	0.00267063	-0.964312	0.512523
Q8NBX0	Saccharopine dehydrogenase-like oxidoreductase	Q8NBX0	SCCPDH	22.1698	22.5575	22.1453	22.5037	22.6451	22.4962	23.2475	23.1185	23.3723	+	CS	2.48174	0.00329805	-0.955221	0.515763
X1WI28;P27635;F8W7C6;A0A087WV22;H7C123;B8A6G2;H7C2C5;A6QRI9;Q96L21	60S ribosomal protein L10	X1WI28;P27635;F8W7C6;A0A087WV22	RPL10	22.9889	22.8971	23.4694	23.1826	22.8199	23.3055	23.798	23.936	24.4739	+	CS	1.60198	0.0250045	-0.950864	0.517322
Q5QNZ2;P24539	ATP synthase F(0) complex subunit B1, mitochondrial	Q5QNZ2;P24539	ATP5F1	22.583	22.1618	22.3643	22.8933	22.5665	22.548	23.0983	23.1898	23.6248	+	CS	2.00074	0.00998291	-0.934591	0.523191
Q96KA5;G5E9Z2	Cleft lip and palate transmembrane protein 1-like protein	Q96KA5;G5E9Z2	CLPTM1L	20.021	20.0448	20.6215	21.1249	21.3777	21.7273	21.136	21.2977	20.9972	+	CS	1.88435	0.0130511	-0.914539	0.530513
P08708;H0YN88;A0A075B716;H0YN73	40S ribosomal protein S17	P08708;H0YN88;A0A075B716	RPS17	22.1057	22.7394	22.3977	23.3659	22.3411	21.9651	23.1525	23.2158	23.5862	+	CS	1.78149	0.016539	-0.903892	0.534443
P35249;C9JZI1;C9JXZ7;C9JTT7;C9J8M3;C9JGY5;F8WE44;C9JW34;H7C1P0	Replication factor C subunit 4	P35249;C9JZI1;C9JXZ7;C9JTT7;C9J8M3	RFC4	20.6208	20.4746	20.7782	20.9809	21.5126	20.2905	21.4202	21.7578	21.384	+	CS	2.42736	0.00373802	-0.896135	0.537324
Q99613;B5ME19;H3BPE4;H3BTY8;H3BPE3	Eukaryotic translation initiation factor 3 subunit C;Eukaryotic translation initiation factor 3 subunit C-like protein	Q99613;B5ME19	EIF3C;EIF3CL	23.3553	23.2831	23.295	23.5536	23.1555	23.7903	24.0396	24.0904	24.4458	+	CS	2.60983	0.00245567	-0.880793	0.543069
F8VUA7;F8VQX7;Q9BZF1	Oxysterol-binding protein;Oxysterol-binding protein-related protein 8	F8VUA7;F8VQX7;Q9BZF1	OSBPL8	19.3554	19.4046	19.6711	20.9681	21.5642	20.2941	20.2109	20.2872	20.4941	+	CS	2.56124	0.00274635	-0.853673	0.553374
Q14008;E9PQH5;H0YDX5;H0YCF6;H0YEK7	Cytoskeleton-associated protein 5	Q14008	CKAP5	22.0815	22.3939	22.7359	22.6659	21.6721	22.3513	23.0627	23.3117	23.3514	+	CS	1.79288	0.0161109	-0.838169	0.559353
P55060	Exportin-2	P55060	CSE1L	25.507	25.2406	25.1291	25.3939	26.4757	25.9355	25.9804	26.2039	26.1748	+	CS	2.47788	0.00332755	-0.827489	0.563509
Q92973;A0A075B780;O14787;E7EW37;S4R398;K7ENW1;K7ESC1	Transportin-1	Q92973	TNPO1	22.4435	22.2981	22.2547	22.972	23.0332	23.5476	23.0614	23.1516	23.2598	+	CS	3.28366	0.000520409	-0.825493	0.564289
H0Y3P2;D3DQV9;P78344;H0YCH5;H0YEC5;H0YD77;E9PKF8;H0YD99;H0YEN8;H0YDC0;H0YCF8;H0YE22	Eukaryotic translation initiation factor 4 gamma 2	H0Y3P2;D3DQV9;P78344;H0YCH5	EIF4G2	21.7527	21.5928	22.2645	21.8661	21.8534	22.2211	22.6928	22.736	22.6344	+	CS	1.79033	0.0162056	-0.817722	0.567337
P50570;K7EMQ3;A0A0D9SFB1;A0A0U1RQP1;A0A0D9SFE4;Q05193;K7EPK9;H7C5U0;E5RHK8;Q9UQ16	Dynamin-2	P50570	DNM2	20.904	21.1735	20.8203	21.1309	21.3455	21.0908	21.8805	21.6699	21.7636	+	CS	2.55447	0.00278951	-0.805402	0.572203
P46778;G3V1B3;M0R181	60S ribosomal protein L21	P46778;G3V1B3;M0R181	RPL21	24.131	24.3322	24.2166	23.9161	24.4815	24.0548	25.1177	24.752	25.2208	+	CS	2.19422	0.00639412	-0.803581	0.572925
P50914;E7EPB3	60S ribosomal protein L14	P50914;E7EPB3	RPL14	24.8911	24.6429	25.0358	24.951	24.8571	25.242	25.5252	25.6683	25.7821	+	CS	2.37542	0.00421286	-0.801922	0.573585
A0A087WZZ5;Q13435;E9PPJ0;E9PJ04;H0YCG1;E9PJT3;H0YEX5;E9PIL8	Splicing factor 3B subunit 2	A0A087WZZ5;Q13435;E9PPJ0	SF3B2	23.517	23.6583	23.589	23.6363	23.4786	23.7736	24.3993	24.3343	24.3867	+	CS	4.18402	6.54612e-05	-0.785349	0.580212
E9PF10;O75694	Nuclear pore complex protein Nup155	E9PF10;O75694	NUP155	21.781	21.9461	22.1713	22.454	22.0196	21.9372	22.8407	22.8283	22.5769	+	CS	2.27591	0.00529767	-0.782509	0.581355
Q10471	Polypeptide N-acetylgalactosaminyltransferase 2;Polypeptide N-acetylgalactosaminyltransferase 2 soluble form	Q10471	GALNT2	21.4444	21.5925	22.022	21.1814	20.5386	21.494	22.367	22.4806	22.5336	+	CS	1.89797	0.0126483	-0.774104	0.584752
Q9BPX3;H0Y9Z8;D6RA93	Condensin complex subunit 3	Q9BPX3;H0Y9Z8	NCAPG	19.9794	20.1331	20.0394	21.5238	21.6569	20.1317	20.6033	20.7804	20.9994	+	CS	2.4236	0.00377054	-0.743767	0.597178
O76094;R4GNC1;D6RDY6	Signal recognition particle subunit SRP72	O76094	SRP72	21.2624	21.6473	21.7862	21.0616	20.869	21.5474	22.2171	22.3082	22.3757	+	CS	1.96617	0.0108102	-0.735027	0.600807
P26640;A0A140T936;A0A140T954;A2ABF4;A0A0G2JJT9;A0A140T904;H0Y426	Valine--tRNA ligase	P26640;A0A140T936	VARS	22.8216	22.9911	23.2499	23.2967	23.0115	23.1258	23.6485	23.7229	23.7699	+	CS	2.23074	0.00587837	-0.692853	0.618629
Q9P2J5	Leucine--tRNA ligase, cytoplasmic	Q9P2J5	LARS	23.1432	22.9751	23.1186	22.9367	22.4306	23.0586	23.6539	23.7992	23.8338	+	CS	3.07094	0.000849301	-0.683364	0.622712
O00116;B8ZZ81	Alkyldihydroxyacetonephosphate synthase, peroxisomal	O00116;B8ZZ81	AGPS	21.5545	21.4554	21.6242	21.6397	21.6085	21.9454	22.0944	22.3011	22.2886	+	CS	2.927	0.00118303	-0.68335	0.622718
P62701;Q8TD47;C9JEH7;P22090	40S ribosomal protein S4, X isoform	P62701	RPS4X	25.4583	25.4075	25.7512	25.4992	25.2269	25.7111	26.2168	26.0928	26.3355	+	CS	2.21022	0.00616285	-0.676047	0.625878
P12956;B1AHC9	X-ray repair cross-complementing protein 6	P12956;B1AHC9	XRCC6	25.634	25.978	25.8128	26.0601	25.4474	25.7491	26.4713	26.4355	26.5404	+	CS	2.53469	0.00291952	-0.67411	0.626719
P55072;C9JUP7;C9IZA5	Transitional endoplasmic reticulum ATPase	P55072	VCP	25.6103	25.5812	25.9306	25.8797	25.4117	25.7973	26.3894	26.3018	26.4079	+	CS	2.31606	0.00482993	-0.659011	0.633312
P07814;V9GYZ6	Bifunctional glutamate/proline--tRNA ligase;Glutamate--tRNA ligase;Proline--tRNA ligase	P07814;V9GYZ6	EPRS	23.986	24.1345	24.3476	24.2766	24.1204	24.1566	24.792	24.7691	24.8573	+	CS	2.41283	0.00386517	-0.650087	0.637242
P62241;Q5JR95	40S ribosomal protein S8	P62241;Q5JR95	RPS8	26.74	26.746	26.6068	26.7201	26.6713	26.8898	27.2819	27.273	27.4547	+	CS	2.9922	0.00101813	-0.638935	0.642187
P43487;C9JJ34;F6WQW2;C9JXG8;C9JGV6;C9JDM3;C9JIC6	Ran-specific GTPase-activating protein	P43487;C9JJ34;F6WQW2;C9JXG8;C9JGV6	RANBP1	22.4122	22.4215	22.3517	21.8528	21.9308	19.517	22.9541	23.0492	22.993	+	CS	4.16794	6.79297e-05	-0.603602	0.658109
F8W1N5;F8VZJ2;F8VNW4;F8W0W4;H0YHX9;Q13765;E9PAV3;F8VZ58;Q9BZK3	Nascent polypeptide-associated complex subunit alpha;Nascent polypeptide-associated complex subunit alpha, muscle-specific form	F8W1N5;F8VZJ2;F8VNW4;F8W0W4;H0YHX9;Q13765;E9PAV3	NACA	23.6438	23.359	23.4601	23.2012	23.1877	23.7096	24.1	24.1298	24.0398	+	CS	2.63243	0.00233116	-0.602235	0.658733
Q01082;A0A087WUZ3;F8W6C1;A4QPE4;M0QZQ3;C9JY79;P11277;Q9H254	Spectrin beta chain, non-erythrocytic 1	Q01082;A0A087WUZ3	SPTBN1	25.3639	25.2277	25.4746	25.5325	25.1291	25.4333	25.931	25.9182	26.0139	+	CS	2.82226	0.00150571	-0.598965	0.660228
Q5VTE0;P68104;A0A087WVQ9;A0A087WV01;Q05639;A6PW80;Q5JR01	Putative elongation factor 1-alpha-like 3;Elongation factor 1-alpha 1;Elongation factor 1-alpha;Elongation factor 1-alpha 2	Q5VTE0;P68104;A0A087WVQ9;A0A087WV01;Q05639	EEF1A1P5;EEF1A1;EEF1A2	28.6614	28.8914	28.8499	28.9296	28.4504	28.6914	29.2949	29.4394	29.4485	+	CS	2.62599	0.00236598	-0.593311	0.66282
B5MCX3;Q15019;H7C310;C9J2Q4;B5MD47;C9IY94;C9IZU3;C9JQJ4;C9J938;C9JB25;H7C2Y0;C9JZI2	Septin-2	B5MCX3;Q15019;H7C310;C9J2Q4	2017-09-02	21.9203	21.902	21.9614	22.0474	22.2256	22.2056	22.4032	22.4659	22.6527	+	CS	2.7779	0.00166763	-0.579393	0.669245
Q14697;F5H6X6;E9PKU7;E9PNH1	Neutral alpha-glucosidase AB	Q14697;F5H6X6;E9PKU7	GANAB	24.2738	24.1598	24.442	24.6232	24.1085	24.4427	24.9011	24.8285	24.8769	+	CS	2.615	0.0024266	-0.576945	0.670382
Q14204;H0YJ21	Cytoplasmic dynein 1 heavy chain 1	Q14204	DYNC1H1	22.9131	23.0765	23.1253	23.3058	22.5263	22.7681	23.6031	23.5449	23.6055	+	CS	2.90519	0.00124397	-0.546185	0.684829
P22234;E9PBS1;D6RF62	Multifunctional protein ADE2;Phosphoribosylaminoimidazole-succinocarboxamide synthase;Phosphoribosylaminoimidazole carboxylase	P22234;E9PBS1;D6RF62	PAICS	25.2123	25.1724	25.0818	25.4021	24.9479	25.2434	25.7076	25.7236	25.6303	+	CS	3.41737	0.000382495	-0.531661	0.691758
F8VPD4;P27708;H7C2E4;H7BZB3;H7C3Z5	CAD protein;Glutamine-dependent carbamoyl-phosphate synthase;Aspartate carbamoyltransferase;Dihydroorotase	F8VPD4;P27708	CAD	24.4092	24.3086	24.3924	24.4797	24.2248	24.225	24.8688	24.8153	24.9693	+	CS	3.14389	0.000717982	-0.514373	0.700097
P61978;Q5T6W2;S4R359;S4R457	Heterogeneous nuclear ribonucleoprotein K	P61978;Q5T6W2	HNRNPK	27.3113	27.2843	27.4009	27.1841	27.4902	27.4582	26.8157	26.8152	26.8173	+	US	3.89773	0.000126551	0.516107	1.43009
B4E1G1;Q9BUN8;E5RGY0	Derlin-1	B4E1G1;Q9BUN8;E5RGY0	DERL1	21.6651	21.6726	21.7852	20.8942	23.7431	22.2347	21.2225	21.0287	21.2248	+	US	2.71656	0.00192059	0.548945	1.46302
B4DHE8;Q96DH6;J3KTC1;B4DM51;J3QKT5	RNA-binding protein Musashi homolog 2	B4DHE8;Q96DH6;J3KTC1;B4DM51	MSI2	20.7691	20.9159	20.921	21.228	21.8883	21.5622	20.1964	20.1543	20.2601	+	US	3.46588	0.000342077	0.665098	1.58568
P51991;H7C1J8	Heterogeneous nuclear ribonucleoprotein A3	P51991	HNRNPA3	24.6082	24.6455	24.7714	24.5765	24.94	24.8478	24.0881	23.7692	23.9315	+	US	2.69041	0.00203983	0.745461	1.67651
Q9GZT3;A0A087WUN7;H0YJ40;G3V4X6;G3V2S9;H0YJW7;H0YJI1	SRA stem-loop-interacting RNA-binding protein, mitochondrial	Q9GZT3;A0A087WUN7;H0YJ40;G3V4X6;G3V2S9;H0YJW7	SLIRP	22.5887	22.6807	23.0879	22.3318	23.211	22.6428	22.0643	21.9619	22.0009	+	US	2.11644	0.00764826	0.77672	1.71323
Q9Y3B7;H0YCD5;E9PQB6	39S ribosomal protein L11, mitochondrial	Q9Y3B7	MRPL11	20.3286	20.5856	20.885	20.0044	19.4755	20.4555	19.7569	19.8253	19.8728	+	US	2.04934	0.00892609	0.781382	1.71878
P40939;H0YFD6	Trifunctional enzyme subunit alpha, mitochondrial;Long-chain enoyl-CoA hydratase;Long chain 3-hydroxyacyl-CoA dehydrogenase	P40939	HADHA	26.1422	26.0992	25.7193	25.3799	25.3059	25.332	25.1955	25.1614	25.1318	+	US	2.43067	0.00370961	0.82398	1.77028
O00182;J3QS92;J3KSY2;Q6DKI2;Q3B8N2;J3KSA0;J3QSH0;J3KS82;J3KT17;J3QR96	Galectin-9;Galectin;Galectin-9C;Galectin-9B	O00182;J3QS92;J3KSY2;Q6DKI2;Q3B8N2	LGALS9;LGALS9C;LGALS9B	24.1482	24.2989	23.8394	24.2838	24.6629	24.1311	23.1308	23.4925	23.1273	+	US	2.01675	0.0096216	0.845277	1.79661
Q92900	Regulator of nonsense transcripts 1	Q92900	UPF1	25.6545	25.3895	25.2875	27.4248	28.2886	27.9641	24.5079	24.5094	24.7406	+	US	2.51531	0.00305277	0.857877	1.81237
P54886	Delta-1-pyrroline-5-carboxylate synthase;Glutamate 5-kinase;Gamma-glutamyl phosphate reductase	P54886	ALDH18A1	25.0857	25.1927	24.6644	23.9942	23.9609	24.2231	24.0865	24.049	24.1923	+	US	2.19323	0.00640871	0.871686	1.8298
A3KN83;K7ES28;Q9Y2G9	Protein strawberry notch homolog 1;Protein strawberry notch homolog 2	A3KN83;K7ES28;Q9Y2G9	SBNO1;SBNO2	19.4081	19.9966	19.7488	21.0376	22.1877	22.4183	18.6013	18.9071	18.9856	+	US	1.8922	0.0128174	0.886469	1.84865
O75323;H7C333;C9J7B1;C9K068	Protein NipSnap homolog 2	O75323;H7C333	GBAS	22.6617	22.3413	22.6156	21.3698	21.2806	21.9124	21.51	21.5989	21.8166	+	US	2.57295	0.00267332	0.897708	1.8631
Q96N66	Lysophospholipid acyltransferase 7	Q96N66	MBOAT7	23.3577	22.821	22.62	23.5262	24.4118	24.1604	21.8605	22.2038	21.9952	+	US	1.71008	0.019495	0.913075	1.88305
P38159;H3BT71;H0Y6E7;Q96E39;H3BR27;H3BUY5;H3BNC1;O75526;Q8N7X1	RNA-binding motif protein, X chromosome;RNA-binding motif protein, X chromosome, N-terminally processed;RNA binding motif protein, X-linked-like-1	P38159;H3BT71;H0Y6E7;Q96E39	RBMX;RBMXL1	26.0219	25.9065	25.8702	26.0053	26.6566	26.2943	25.0115	24.8975	25.1066	+	US	3.59165	0.000256065	0.927669	1.9022
Q96QA5;J3KRG2	Gasdermin-A	Q96QA5;J3KRG2	GSDMA	24.8662	24.5448	24.1859	24.5854	24.7801	24.2385	23.2845	23.64	23.876	+	US	1.63136	0.0233688	0.932127	1.90809
G5E9W7;G5E9V5;P82650;H7C5F2;H7C5H3	28S ribosomal protein S22, mitochondrial	G5E9W7;G5E9V5;P82650;H7C5F2;H7C5H3	MRPS22	21.473	21.7227	21.2238	21.0645	20.087	20.1913	20.7565	20.096	20.762	+	US	1.62082	0.0239432	0.934975	1.91186
H0YE91;Q15782;H0YEJ1;E9PRL9;E9PII8;E9PPX4;E9PP75;E9PIX1;E9PR52	Chitinase-3-like protein 2	H0YE91;Q15782	CHI3L2	22.4001	21.8809	22.0781	21.2097	21.5395	22.2318	20.776	21.4134	21.2982	+	US	1.74296	0.0180732	0.957173	1.9415
Q99714;Q5H928	3-hydroxyacyl-CoA dehydrogenase type-2	Q99714;Q5H928	HSD17B10	25.6524	26.0084	25.6054	25.1822	24.5009	24.8052	24.7876	24.8495	24.7061	+	US	2.72334	0.00189085	0.974346	1.96475
P14866;M0QXS5;M0QYT0;M0R1W6;M0R076;B4DVF8;M0QYL7;H7C464;B7WPG3;C9IYN3;D6W592;Q8WVV9	Heterogeneous nuclear ribonucleoprotein L	P14866;M0QXS5	HNRNPL	26.0359	26.0111	25.6616	25.8013	26.4789	26.1379	24.9949	24.8671	24.8945	+	US	2.82623	0.001492	0.984065	1.97803
C9JP00;A0A0A0MQX8;Q9NR56;O95205;H7C4T5;Q5VZF2;C9JCX1;H7C4Y1;Q86VM6	Muscleblind-like protein 1;Muscleblind-like protein 2	C9JP00;A0A0A0MQX8;Q9NR56;O95205;H7C4T5;Q5VZF2	MBNL1;MBLL;MBNL2	23.5664	22.8388	22.8707	24.1084	24.7336	24.4717	22.2076	22.0958	22.0059	+	US	1.80862	0.0155374	0.988883	1.98465
H7BXY3;Q7L2E3	Putative ATP-dependent RNA helicase DHX30	H7BXY3;Q7L2E3	DHX30	24.1367	24.0776	23.7075	23.8355	24.4535	24.3844	22.8988	22.8979	23.1426	+	US	2.49636	0.00318893	0.994143	1.9919
Q15424;K7ES42	Scaffold attachment factor B1	Q15424	SAFB	24.8531	24.8254	24.8307	25.1956	25.9362	25.7405	23.6467	23.834	24.0278	+	US	3.08544	0.00082141	1.0002	2.00028
P82933	28S ribosomal protein S9, mitochondrial	P82933	MRPS9	22.632	22.1282	21.6904	21.3271	21.5882	21.684	21.3783	20.9644	21.1068	+	US	1.54736	0.0283556	1.00033	2.00046
E9PIN3;Q9UBU9;B4E227;E9PLA7	Nuclear RNA export factor 1	E9PIN3;Q9UBU9;B4E227	NXF1	20.438	20.536	20.6806	21.7114	22.7162	22.6849	19.1124	19.7574	19.7122	+	US	2.02025	0.0095445	1.02417	2.03379
A0A087WVM4;B7ZM99;Q6UB35;Q4VXM0;H0Y327;Q4VXM1;Q4VXV2	Monofunctional C1-tetrahydrofolate synthase, mitochondrial	A0A087WVM4;B7ZM99;Q6UB35	MTHFD1L	24.8804	24.8774	24.2925	23.6362	23.7612	23.9884	23.6558	23.6435	23.6443	+	US	2.21467	0.00610007	1.03557	2.04992
P16402	Histone H1.3	P16402	HIST1H1D	31.1766	30.7469	30.6732	31.2781	31.8887	31.4756	29.7711	29.7474	29.9617	+	US	2.43077	0.0037088	1.03889	2.05464
O75223;M0QZK8;B8ZZK2;H7BZK5;A0A0B4J1Y4	Gamma-glutamylcyclotransferase	O75223;M0QZK8;B8ZZK2;H7BZK5	GGCT	23.1058	23.0616	22.9938	23.9172	23.8839	23.101	21.8352	21.6809	22.4817	+	US	1.88473	0.0130399	1.05446	2.07695
P22626;A0A087WUI2	Heterogeneous nuclear ribonucleoproteins A2/B1	P22626;A0A087WUI2	HNRNPA2B1	26.9063	26.8046	27.153	26.5015	26.9799	27.0327	25.8034	26.0883	25.769	+	US	2.74545	0.001797	1.06772	2.09612
Q9Y4W6;K7EP56	AFG3-like protein 2	Q9Y4W6	AFG3L2	22.7164	22.6188	22.2202	21.6075	22.103	22.2164	21.3998	21.5376	21.3884	+	US	2.60338	0.00249242	1.07657	2.10901
Q96I99;H0Y852;E9PDQ8	Succinyl-CoA ligase [GDP-forming] subunit beta, mitochondrial	Q96I99;H0Y852;E9PDQ8	SUCLG2	23.1784	23.5054	22.91	22.2723	22.261	22.3522	22.2435	21.8706	22.2269	+	US	2.16905	0.00677568	1.08427	2.1203
Q9P2R7;Q5T9Q5;Q5T9Q8;A0A0U1RQL1;A0A0U1RRI1;A0A0U1RQF8;A0A0U1RQU7	Succinyl-CoA ligase [ADP-forming] subunit beta, mitochondrial	Q9P2R7;Q5T9Q5	SUCLA2	24.3408	24.0733	23.7979	22.8388	23.0486	23.1157	23.1269	22.9469	22.8516	+	US	2.46694	0.00341238	1.09549	2.13686
P38117;M0QY67	Electron transfer flavoprotein subunit beta	P38117	ETFB	25.2855	25.547	24.7904	24.7312	24.2635	24.6062	24.0288	24.0692	24.1934	+	US	2.09003	0.00812767	1.11051	2.15921
F8W726;Q14157;Q5VU77;H0Y5H6;H7C2T8	Ubiquitin-associated protein 2-like	F8W726;Q14157;Q5VU77	UBAP2L	23.419	23.3133	23.1646	23.26	24.036	24.0029	22.1503	22.0172	22.3632	+	US	3.07091	0.000849352	1.1221	2.17663
Q92947;K7EKT3;K7ES74	Glutaryl-CoA dehydrogenase, mitochondrial	Q92947;K7EKT3	GCDH	21.5023	21.234	21.3058	20.6235	21.7372	22.0384	20.4214	20.008	20.226	+	US	2.8466	0.00142363	1.12888	2.18689
Q5BKZ1;A0A0A0MRN4;E2QRN4	DBIRD complex subunit ZNF326	Q5BKZ1;A0A0A0MRN4	ZNF326	22.5875	22.6016	22.1294	22.2334	22.7356	22.0056	21.4429	21.4584	20.9947	+	US	2.20142	0.006289	1.14083	2.20508
P13995;B9A062	Bifunctional methylenetetrahydrofolate dehydrogenase/cyclohydrolase, mitochondrial;NAD-dependent methylenetetrahydrofolate dehydrogenase;Methenyltetrahydrofolate cyclohydrolase	P13995;B9A062	MTHFD2	23.1541	23.1734	22.7787	20.0995	21.7499	19.5304	21.8474	21.8142	21.9779	+	US	2.95546	0.001108	1.15557	2.22772
P53597;H7C233	Succinyl-CoA ligase [ADP/GDP-forming] subunit alpha, mitochondrial	P53597	SUCLG1	23.6434	22.9791	23.0053	21.7508	21.9878	21.9177	22.1987	21.9689	21.9885	+	US	2.13977	0.00724814	1.15726	2.23033
P31944	Caspase-14;Caspase-14 subunit p17, mature form;Caspase-14 subunit p10, mature form;Caspase-14 subunit p20, intermediate form;Caspase-14 subunit p8, intermediate form	P31944	CASP14	23.4326	22.6085	22.7859	23.0437	24.0244	23.2624	21.9576	21.7619	21.6054	+	US	1.90411	0.0124706	1.16739	2.24605
P48735;H0YL11;C9J4N6	Isocitrate dehydrogenase [NADP], mitochondrial	P48735	IDH2	27.3995	27.1209	27.1089	26.3321	26.4219	26.2381	25.8851	26.0257	26.0728	+	US	3.41198	0.00038728	1.21524	2.32179
O75342	Arachidonate 12-lipoxygenase, 12R-type	O75342	ALOX12B	23.8645	23.6384	23.3445	23.9347	24.4914	23.9802	22.3722	22.0404	22.7851	+	US	2.00825	0.00981193	1.21655	2.3239
Q7Z417	Nuclear fragile X mental retardation-interacting protein 2	Q7Z417	NUFIP2	22.7806	23.1914	22.9998	22.9672	23.8196	23.4321	21.7318	21.6733	21.7555	+	US	3.32977	0.000467987	1.27041	2.41229
M0QWZ7;Q9NP81;M0R2C6;M0QX29;B4DJM9;M0R259;M0R1C0;M0R2H5	Serine--tRNA ligase, mitochondrial	M0QWZ7;Q9NP81;M0R2C6;M0QX29;B4DJM9;M0R259	SARS2	22.4472	21.559	21.5338	20.7107	20.7141	21.0652	20.6542	20.5847	20.4795	+	US	1.85707	0.0138972	1.27386	2.41808
Q9BX68	Histidine triad nucleotide-binding protein 2, mitochondrial	Q9BX68	HINT2	21.0551	21.3248	21.8256	20.6627	20.2335	21.4427	20.569	19.5434	20.2714	+	US	1.54807	0.0283093	1.27389	2.41813
K7EJE8;K7EKE6;P36776;K7ER27;K7ER56;K7ERR6;K7EQF8	Lon protease homolog, mitochondrial	K7EJE8;K7EKE6;P36776	LONP1	26.8954	26.9058	26.5098	25.8166	25.8372	25.4931	25.656	25.2775	25.5475	+	US	2.75321	0.00176518	1.27664	2.42274
P22033	Methylmalonyl-CoA mutase, mitochondrial	P22033	MUT	22.6672	22.7764	22.0029	21.4173	21.7822	22.0528	21.1128	21.1553	21.3375	+	US	2.15436	0.0070088	1.28033	2.42895
B4DY09;Q12905;X6R6Z1;A0A0A0MRL0	Interleukin enhancer-binding factor 2	B4DY09;Q12905;X6R6Z1	ILF2	26.3302	26.3704	26.0133	26.7468	27.4133	27.1014	24.9663	24.8393	25.0293	+	US	3.29394	0.000508227	1.29302	2.45041
P61313;E7EQV9;E7ENU7;E7EX53;E7ERA2	60S ribosomal protein L15;Ribosomal protein L15	P61313;E7EQV9;E7ENU7;E7EX53	RPL15	26.5463	26.1556	25.8304	25.1871	25.6616	25.0685	24.6334	24.7482	25.2601	+	US	1.9944	0.0101297	1.29685	2.45692
H0YL72;P50213;H0YLI6;H0YMU3;H0YM46;H0YNF5;H0YKD0;H0YM64	Isocitrate dehydrogenase [NAD] subunit alpha, mitochondrial	H0YL72;P50213;H0YLI6;H0YMU3	IDH3A	24.3421	24.4694	23.8875	22.8692	23.2245	23.0691	22.9414	22.7753	22.8988	+	US	2.75383	0.00176268	1.36116	2.56892
P30038;Q5TF55	Delta-1-pyrroline-5-carboxylate dehydrogenase, mitochondrial	P30038	ALDH4A1	22.1355	21.2075	21.8225	20.7958	20.7667	20.5592	20.0134	20.537	20.3941	+	US	1.95846	0.0110039	1.40699	2.65183
Q12906;K7EQR9;K7EKJ9;K7ERM6;K7ENK6;K7EM82;K7EJ09;K7ER69;K7ELV3	Interleukin enhancer-binding factor 3	Q12906	ILF3	26.6822	26.2522	26.229	26.9123	27.4852	27.3091	24.895	24.9388	25.1075	+	US	3.02537	0.000943267	1.40734	2.65247
F2Z2W6;F2Z2Y5;H7BXJ5;P05114	Non-histone chromosomal protein HMG-14	F2Z2W6;F2Z2Y5;H7BXJ5;P05114	HMGN1	21.3337	19.5989	20.5529	20.6751	21.2312	21.1825	19.1672	19.0253	19.0337	+	US	1.31966	0.0479008	1.41979	2.67547
O75439;G3V0E4;F8WEA6;F8WBE1;F8WAZ6	Mitochondrial-processing peptidase subunit beta	O75439;G3V0E4	PMPCB	24.1639	23.9278	23.862	23.1898	23.2091	23.2691	22.583	22.5099	22.584	+	US	3.94182	0.000114335	1.4256	2.68627
O75534;E9PLT0;E9PLD4;E9PKN4;E9PNG3	Cold shock domain-containing protein E1	O75534;E9PLT0	CSDE1	25.2641	25.4481	25.3368	24.974	25.3271	25.1881	23.6808	23.8904	24.1724	+	US	3.15207	0.000704578	1.43514	2.70408
P10412	Histone H1.4	P10412	HIST1H1E	30.3548	29.4385	29.1711	30.122	30.7162	30.4174	27.968	28.0984	28.5859	+	US	1.62397	0.0237699	1.43737	2.70827
P49411;H3BNU3	Elongation factor Tu, mitochondrial	P49411	TUFM	27.2215	27.5601	27.067	26.3404	26.1842	26.2772	25.9971	25.7549	25.7453	+	US	3.01165	0.000973521	1.45043	2.7329
Q92665	28S ribosomal protein S31, mitochondrial	Q92665	MRPS31	21.8693	22.2445	21.0395	20.4813	21.5546	21.7909	20.4094	20.1956	20.1893	+	US	1.79224	0.0161345	1.45301	2.73779
Q8WWM7;H3BUF6;H3BSK9;H3BUE3;H3BRB0;A0A0C4DGL7;H3BSQ5	Ataxin-2-like protein	Q8WWM7;H3BUF6	ATXN2L	24.123	23.8819	24.0419	24.5308	25.3027	25.1192	22.2705	22.7346	22.5885	+	US	3.1861	0.00065148	1.48444	2.79808
Q13283;E5RIZ6;E5RI46;E5RIF8;E5RH42;E5RJU8;E5RH00;D6R9X5;D6R9A4;D6RBM9;D6REX8;D6RBR0;D6RE13;D6RBW8	Ras GTPase-activating protein-binding protein 1	Q13283	G3BP1	24.6923	24.389	24.2509	24.4439	25.0846	24.7541	22.9119	22.7825	23.1449	+	US	3.05746	0.000876063	1.49766	2.82383
C9JDR0;Q15738	Sterol-4-alpha-carboxylate 3-dehydrogenase, decarboxylating	C9JDR0;Q15738	NSDHL	21.5573	22.4541	21.6139	20.0777	21.39	21.7345	20.3129	20.2726	20.4576	+	US	2.17754	0.00664447	1.52738	2.88262
O76031;H0YM48;H0YK07	ATP-dependent Clp protease ATP-binding subunit clpX-like, mitochondrial	O76031	CLPX	24.8422	24.7182	24.3061	22.8616	23.5764	23.6194	23.0507	23.019	23.169	+	US	3.10381	0.000787392	1.54263	2.91325
Q4G176;F5H755;F5H5A1;F5H362;H0YGC7;F5H3B2;F5H2G6;H0YH37;F5GX20	Acyl-CoA synthetase family member 3, mitochondrial	Q4G176;F5H755;F5H5A1;F5H362;H0YGC7	ACSF3	24.0182	23.7423	22.5339	22.2352	23.0655	22.7706	22.1192	21.6563	21.7581	+	US	1.53501	0.0291738	1.58698	3.0042
B7Z9I1;Q5T4U5;P11310;E9PJM9;H0YDT5;E9PRX4	Medium-chain specific acyl-CoA dehydrogenase, mitochondrial	B7Z9I1;Q5T4U5;P11310	ACADM	25.9532	26.1793	25.5711	24.8639	24.7098	24.6795	24.2037	24.2244	24.4756	+	US	2.8961	0.00127028	1.59999	3.0314
Q9HCD5;Q5JY17	Nuclear receptor coactivator 5	Q9HCD5	NCOA5	22.2751	21.6863	21.902	21.0321	22.5627	22.7539	20.8493	19.7702	20.4206	+	US	1.96378	0.0108697	1.60782	3.0479
P16989;A0A0D9SEI8	Y-box-binding protein 3	P16989	YBX3	25.2739	25.347	24.8202	25.5794	25.917	25.8641	23.1708	23.7891	23.6569	+	US	2.52243	0.00300311	1.6081	3.0485
P07305	Histone H1.0;Histone H1.0, N-terminally processed	P07305	H1F0	23.8302	23.5879	22.5182	22.8525	23.8535	22.9509	22.0336	21.6871	21.3615	+	US	1.64946	0.0224153	1.61805	3.0696
A0A087WZN1;O43837;A0A087X2E5;A0A0D9SG66	Isocitrate dehydrogenase [NAD] subunit, mitochondrial;Isocitrate dehydrogenase [NAD] subunit beta, mitochondrial	A0A087WZN1;O43837;A0A087X2E5	IDH3B	23.9827	23.6382	23.5807	22.7352	23.1706	22.9976	22.1685	22.0104	22.0645	+	US	3.60757	0.000246846	1.65277	3.14436
P67809;A0A087X1S2;H0Y449;C9J5V9	Nuclease-sensitive element-binding protein 1	P67809;A0A087X1S2;H0Y449	YBX1	28.2904	28.4524	28.5573	28.3516	29.0827	29.04	26.7192	26.8979	26.6759	+	US	4.06849	8.54099e-05	1.66906	3.18007
P47914	60S ribosomal protein L29	P47914	RPL29	27.843	27.2116	26.9299	26.9891	27.2524	26.8614	25.5932	25.5849	25.6833	+	US	2.48451	0.0032771	1.70773	3.26646
Q9BRZ2;C9JI91	E3 ubiquitin-protein ligase TRIM56	Q9BRZ2	TRIM56	20.0542	20.8738	20.88	19.7131	19.875	19.8389	18.9184	18.9727	18.6627	+	US	2.4189	0.0038115	1.75139	3.36683
P51114;B4DXZ6;E9PFF5;E7EU85;C9JAJ4;C9JYQ6;R9WNI0;A8MQB8;G3V0J0;Q06787	Fragile X mental retardation syndrome-related protein 1	P51114;B4DXZ6;E9PFF5;E7EU85	FXR1	23.8841	23.8889	23.8474	23.0885	23.507	23.6177	22.1521	22.0043	22.2064	+	US	5.0366	9.19169e-06	1.75252	3.36946
F5H5I6;Q12849;H0Y8R1;H0YAK1;H0YAM1	G-rich sequence factor 1	F5H5I6;Q12849;H0Y8R1;H0YAK1	GRSF1	24.1238	23.3596	23.5628	23.3762	24.2549	23.899	22.0275	21.7912	21.9044	+	US	2.75861	0.00174338	1.7744	3.42096
O75934	Pre-mRNA-splicing factor SPF27	O75934	BCAS2	21.7834	21.9706	20.2333	21.1492	21.7732	20.6956	19.9734	18.697	19.9426	+	US	1.2151	0.0609392	1.79141	3.46152
P42704;A0A0C4DG06;B8ZZ38;C9JCA9;A0A0C4DG51;Q9NP80	Leucine-rich PPR motif-containing protein, mitochondrial	P42704	LRPPRC	27.9787	27.8363	27.5458	27.2271	28.0205	27.8554	25.9745	25.9383	26.0711	+	US	3.75083	0.000177489	1.79235	3.46379
Q9BYD6;H0Y8N7	39S ribosomal protein L1, mitochondrial	Q9BYD6;H0Y8N7	MRPL1	22.6561	22.0533	22.0747	21.4492	21.7866	21.5752	21.1705	19.3852	20.8276	+	US	1.43926	0.0363701	1.80028	3.48288
G3XAI9;Q5BKY9;Q8N9E0	Protein FAM133B;Protein FAM133A	G3XAI9;Q5BKY9;Q8N9E0	FAM133B;FAM133A	22.2219	21.6337	21.3995	23.4083	24.1159	23.3938	19.8557	19.6034	20.1361	+	US	2.54625	0.00284283	1.88668	3.69784
Q13085;Q59FY4;O00763;A0A0C4DGT1;A0A087WVR6;A0A087X2F8;A0A087X0W4;A0A087X126;S4R3S7;F8W8T8;H0YGH5	Acetyl-CoA carboxylase 1;Biotin carboxylase	Q13085;Q59FY4	ACACA	25.1172	24.7048	24.7936	22.8942	22.7354	23.5522	23.1008	22.8615	22.9101	+	US	3.72035	0.000190393	1.91441	3.7696
P04181	Ornithine aminotransferase, mitochondrial;Ornithine aminotransferase, hepatic form;Ornithine aminotransferase, renal form	P04181	OAT	21.8856	22.0827	21.6615	20.9598	20.5539	20.431	20.3796	20.6745	18.7258	+	US	1.46313	0.034425	1.94992	3.86354
P12004	Proliferating cell nuclear antigen	P12004	PCNA	26.8539	26.9187	25.7364	24.3501	23.8832	24.1726	24.3514	24.6798	24.4459	+	US	2.14921	0.00709239	2.01059	4.02947
Q14444;E9PLA9;G3V153;A0A087X082	Caprin-1	Q14444;E9PLA9;G3V153;A0A087X082	CAPRIN1	24.7703	24.4361	25.0161	24.3535	25.1912	25.097	22.7023	22.8529	22.518	+	US	3.34292	0.00045403	2.04976	4.14038
Q13428;H0YA99	Treacle protein	Q13428	TCOF1	26.3188	25.8297	25.9086	26.8362	27.4428	26.7925	24.1104	23.6243	24.1602	+	US	3.0719	0.000847416	2.05407	4.15275
E7EPN9;Q9Y520;H7C5N8;A0A0A0MS30	Protein PRRC2C	E7EPN9;Q9Y520	PRRC2C	24.2755	23.175	23.2878	25.1083	25.3746	25.2896	21.3469	21.4767	21.5567	+	US	2.40355	0.00394862	2.11937	4.34504
P11177;C9J634;F8WF02	Pyruvate dehydrogenase E1 component subunit beta, mitochondrial	P11177;C9J634	PDHB	23.5465	23.3076	23.0366	21.496	22.0721	21.5712	21.0393	21.1119	21.2949	+	US	3.68922	0.000204539	2.1482	4.43273
Q9NWH9;H7BXE3;H7C3F4;H0YL55;H0YLW7;H0YMW8;H0YNF3;H0YMR6;H0YLE6;H0YKH2;H0YMM0;H0YKU6	SAFB-like transcription modulator	Q9NWH9;H7BXE3;H7C3F4	SLTM	24.4968	23.9652	24.1725	25.6406	26.2554	25.8794	21.8486	22.1107	22.2296	+	US	3.44604	0.000358068	2.14852	4.43374
A0A087WXZ3;Q9Y5A9;S4R3V3;S4R3J8;Q9BYJ9	YTH domain-containing family protein 2	A0A087WXZ3;Q9Y5A9;S4R3V3	YTHDF2	22.7227	22.331	22.5814	23.497	24.3312	23.7969	21.5392	19.5314	19.5619	+	US	1.58926	0.0257481	2.33419	5.04269
Q9NZI8;F8W930;Q9Y6M1	Insulin-like growth factor 2 mRNA-binding protein 1	Q9NZI8	IGF2BP1	26.5195	26.4542	26.4067	26.1775	26.9859	26.6218	24.0346	24.1287	24.1932	+	US	5.69343	2.02569e-06	2.34129	5.06756
A3KMH1	von Willebrand factor A domain-containing protein 8	A3KMH1	VWA8	23.8844	23.4188	23.2711	21.6736	21.7012	21.7934	20.9855	21.1761	21.3517	+	US	3.41946	0.000380665	2.35367	5.11121
O00425;F8WD15	Insulin-like growth factor 2 mRNA-binding protein 3	O00425	IGF2BP3	25.2167	25.1222	25.0748	25.2013	25.8365	25.5349	22.7696	22.6812	22.8189	+	US	5.67786	2.09961e-06	2.38136	5.21027
CATG_HUMAN;P08311	Cathepsin G	CATG_HUMAN;P08311	CTSG	22.0258	22.6145	21.4848	20.8556	20.162	20.9173	19.0199	19.118	20.7735	+	US	1.66853	0.0214522	2.40457	5.29479
Q04837;A0A0G2JLD8;E7EUY5;C9K0U8	Single-stranded DNA-binding protein, mitochondrial	Q04837;A0A0G2JLD8;E7EUY5	SSBP1	26.6566	26.2916	26.2737	23.8223	23.6127	24.3272	23.8129	24.1746	23.9189	+	US	3.91763	0.000120885	2.43847	5.42065
Q5JTZ9	Alanine--tRNA ligase, mitochondrial	Q5JTZ9	AARS2	24.4923	24.4677	24.3128	22.2447	23.8196	23.0855	21.9239	21.9819	21.9611	+	US	5.71867	1.91129e-06	2.46865	5.53525
P48634	Protein PRRC2A	P48634	PRRC2A	23.7239	23.7182	24.0596	24.5977	25.5981	25.3212	21.3055	21.1942	21.3579	+	US	4.49717	3.18296e-05	2.54801	5.84827
O43390;B4DT28	Heterogeneous nuclear ribonucleoprotein R	O43390;B4DT28	HNRNPR	28.4099	28.6386	28.3403	28.2439	28.7161	28.6261	25.8351	25.6345	25.878	+	US	4.66361	2.16966e-05	2.68042	6.41042
P04585		P04585	GAG-POL	29.846	29.8131	29.5307	29.1049	29.6683	29.555	27.107	26.9922	26.9285	+	US	4.75537	1.75642e-05	2.72071	6.59199
P04591		P04591	GAG	23.2908	25.568	24.8172	23.6194	23.3691	24.4094	22.0065	21.2729	21.2412	+	US	1.88699	0.012972	3.05179	8.2924
O60506;B7Z645;F6UXX1	Heterogeneous nuclear ribonucleoprotein Q	O60506;B7Z645	SYNCRIP	27.0861	27.4727	27.4118	26.5889	27.2038	27.0751	24.0615	24.0283	24.124	+	US	4.91174	1.22535e-05	3.25222	9.5283
Q9NZB2;A0A0C4DG79;A0A0C4DH52;Q5T035	Constitutive coactivator of PPAR-gamma-like protein 1	Q9NZB2	FAM120A	27.0437	27.071	27.0292	26.7667	27.4047	27.1803	23.493	23.6023	23.7617	+	US	5.77407	1.6824e-06	3.42897	10.7702
E9PHF7;Q96RQ3;F5GYT8;E9PG35;G5E9X5	Methylcrotonoyl-CoA carboxylase subunit alpha, mitochondrial	E9PHF7;Q96RQ3;F5GYT8;E9PG35;G5E9X5	MCCC1	24.2971	23.9506	24.0976	21.9603	20.0699	19.9237	20.2747	20.4527	20.0866	+	US	4.91014	1.22986e-05	3.84378	14.358
P05165;Q5JVH2;H0Y4B9;H0Y5U0	Propionyl-CoA carboxylase alpha chain, mitochondrial	P05165	PCCA	24.1616	24.0117	24.7666	19.6127	22.3641	20.7706	19.8044	20.4035	20.2732	+	US	3.83726	0.000145457	4.15296	17.7896
Q9HCE1;Q5JR04	Putative helicase MOV-10	Q9HCE1;Q5JR04	MOV10	26.66	26.5518	26.3851	27.2776	28.0734	27.871	21.6989	21.6449	21.7519	+	US	6.22745	5.92318e-07	4.83375	28.5169
P11498;E9PRE7;E9PS68	Pyruvate carboxylase, mitochondrial	P11498;E9PRE7	PC	27.3313	27.2882	27.1226	19.4653	18.4697	19.5905	20.8329	15.8009	16.7253	+	US	2.44054	0.00362629	9.46101	704.771
C9JF17;P05090;C9JX71;F8WBT9	Apolipoprotein D	C9JF17;P05090;C9JX71	APOD	21.0114	19.6919	19.6842	21.9137	22.0781	23.016	20.1707	25.5386	19.9488			0.394775	0.402926	-1.75687	0.295889
Q9NZ08;D6RAL9	Endoplasmic reticulum aminopeptidase 1	Q9NZ08	ERAP1	22.9211	17.9917	22.181	22.9634	22.6648	22.6398	22.8799	22.7445	22.6137			0.485495	0.326968	-1.71476	0.304654
P53004;C9J1E1	Biliverdin reductase A	P53004	BLVRA	24.6869	20.3599	19.5634	19.246	24.7291	23.8415	23.5897	23.0411	23.1055			0.460873	0.34604	-1.70866	0.305945
Q5JRI1;O75494;Q6IQ42;Q8WXF0	Serine/arginine-rich splicing factor 10;Serine/arginine-rich splicing factor 12	Q5JRI1;O75494;Q6IQ42;Q8WXF0	SRSF10;FUSIP1;SRSF12	21.0293	19.1271	19.4833	20.7807	22.4197	21.8482	21.4833	21.3326	21.3733			1.21685	0.0606947	-1.51651	0.34953
Q01650	Large neutral amino acids transporter small subunit 1	Q01650	SLC7A5	22.5991	19.5839	22.9408	22.6238	22.9629	22.8997	23.2487	23.3475	22.9253			0.612466	0.244081	-1.46589	0.362013
Q9HCY8	Protein S100-A14	Q9HCY8	S100A14	20.6428	18.7664	21.2404	22.468	24.0944	21.2816	21.4576	20.8008	22.7633			0.705736	0.196908	-1.45734	0.364164
C9JA36;P54709;H7C4L9;C9JXZ1	Sodium/potassium-transporting ATPase subunit beta-3	C9JA36;P54709;H7C4L9;C9JXZ1	ATP1B3	20.8594	21.2669	19.0708	19.0137	21.3711	21.2522	21.4708	21.415	22.5246			0.853079	0.140256	-1.40444	0.377764
P27824;D6RAQ8;D6RFL1;D6RAU8;D6RB85;D6RDP7;H0Y9Q7;H0Y9H1;D6RGY2;D6RHJ3;D6RD16	Calnexin	P27824	CANX	21.8849	22.029	23.828	22.5651	21.4875	21.833	23.9054	24.0206	23.7727			0.982611	0.104085	-1.31893	0.400832
P63267;P68133;P68032;P62736;A6NL76;F8WB63;B8ZZJ2;C9JFL5;F6UVQ4;F6QUT6	Actin, gamma-enteric smooth muscle;Actin, alpha skeletal muscle;Actin, alpha cardiac muscle 1;Actin, aortic smooth muscle	P63267;P68133;P68032;P62736;A6NL76	ACTG2;ACTA1;ACTC1;ACTA2	21.2603	23.7021	25.6244	24.1741	21.9227	22.8944	25.3627	24.3192	24.596			0.400366	0.397772	-1.23036	0.426212
O60231;Q5SQH5;A0A140T8Y5;A0A140T947;A0A140T9T4	Putative pre-mRNA-splicing factor ATP-dependent RNA helicase DHX16	O60231;Q5SQH5;A0A140T8Y5;A0A140T947	DHX16	19.6635	19.4883	19.3369	19.5162	21.4694	19.5015	21.8927	19.7056	20.5761			0.891038	0.128517	-1.22853	0.426752
Q99805	Transmembrane 9 superfamily member 2	Q99805	TM9SF2	19.1067	18.517	20.309	22.0672	21.4294	19.4397	20.1279	21.3895	20.0755			0.831863	0.147278	-1.22005	0.429267
P43403;P43405;Q8NFD2	Tyrosine-protein kinase ZAP-70	P43403	ZAP70	22.6847	21.5418	22.8071	22.4442	22.7668	23.0422	23.6723	23.6471	23.3377			1.35374	0.0442858	-1.20783	0.432919
Q8TC12;G3V2G6;G3V234;H0YJ10;H0YIZ8;H0YJ46	Retinol dehydrogenase 11	Q8TC12;G3V2G6;G3V234	RDH11	20.0456	21.0808	21.4747	21.8268	21.0031	21.7926	22.0399	21.9458	22.1631			1.28717	0.0516217	-1.18259	0.440561
P17812	CTP synthase 1	P17812	CTPS1	20.6687	21.6699	22.5619	22.3107	20.4027	22.3357	22.9431	22.7359	22.6822			0.978359	0.105109	-1.15356	0.449516
A0A087WUL2;P49720;A0A087WXQ8;A0A087WY10	Proteasome subunit beta type-3	A0A087WUL2;P49720;A0A087WXQ8;A0A087WY10	PSMB3	21.9871	21.2521	20.1882	20.1154	21.5775	22.5973	22.4264	22.3772	21.9921			0.974316	0.106092	-1.12276	0.459216
H0Y512;Q9HDC9	Adipocyte plasma membrane-associated protein	H0Y512;Q9HDC9	APMAP	20.6457	20.2273	21.965	20.8561	21.9292	21.9025	21.5082	21.6378	22.9793			0.711167	0.194461	-1.09578	0.467883
B4DR61;P61619;H7C1Q9;C9JXC6;H7C069;A6NK38;F2Z2C7;A6NIF9;C9JJV4;F8W776;Q8TC24;Q9H9S3	Protein transport protein Sec61 subunit alpha isoform 1;Protein transport protein Sec61 subunit alpha isoform 2	B4DR61;P61619;H7C1Q9;C9JXC6;H7C069;A6NK38;F2Z2C7;A6NIF9;C9JJV4;F8W776;Q8TC24;Q9H9S3	SEC61A1;SEC61A2	18.736	21.0789	21.8357	20.4635	20.9002	20.9936	21.7238	21.7631	21.3476			0.490719	0.323058	-1.06134	0.479187
P51572;C9JSP1;C9JQ75;C9J0M4	B-cell receptor-associated protein 31	P51572	BCAP31	21.3833	20.9074	22.3845	21.5071	20.374	21.5625	22.725	22.4893	22.6102			1.12054	0.0757641	-1.04975	0.483051
Q14683;G8JLG1;H0Y7K8;V9GYN9;V9GY57	Structural maintenance of chromosomes protein 1A;Structural maintenance of chromosomes protein	Q14683;G8JLG1	SMC1A	20.6246	20.762	19.7449	20.7809	22.5384	20.8105	21.6096	21.0201	21.6491			1.30059	0.0500502	-1.04908	0.483276
P47897;B4DDN1;H7C0R3;C9J165;A0A0U1RQX5;A0A0U1RRC8;A0A0U1RR66;A0A0U1RQT0;F2Z2V6;A0A0U1RQM8;A0A0U1RQU2;A0A0U1RQX9;A0A0U1RRI9;A0A0U1RQE9;A0A0U1RQL2;A0A0U1RQQ5	Glutamine--tRNA ligase	P47897;B4DDN1;H7C0R3	QARS	21.6364	21.3334	22.8164	22.0785	21.9099	22.3888	23.0826	22.7402	23.0959			1.0502	0.0890845	-1.04419	0.484916
Q15052;E9PDQ5;B1ALK7;Q14155	Rho guanine nucleotide exchange factor 6	Q15052	ARHGEF6	19.8606	21.4632	20.9546	20.8658	21.467	21.1927	21.5652	21.7556	22.0548			0.979833	0.104753	-1.03241	0.488893
B1AN48;Q9UBC9	Small proline-rich protein 3	B1AN48;Q9UBC9	SPRR3	20.1211	20.2398	20.587	20.6975	21.9413	19.2493	24.2151	19.9843	19.8092			0.284254	0.519692	-1.02021	0.493045
O43818	U3 small nucleolar RNA-interacting protein 2	O43818	RRP9	19.1589	20.3647	20.1568	19.5745	19.7729	19.9225	20.6318	20.0863	22.0089			0.675813	0.210954	-1.01556	0.494635
P04083;Q5T3N1;Q5T3N0	Annexin A1;Annexin	P04083;Q5T3N1	ANXA1	24.0345	24.6823	23.9796	24.5234	23.9907	24.329	26.6436	24.4392	24.6497			0.61614	0.242025	-1.01202	0.495851
F5H669;Q8N684;J3QT54;F5H6M0;F5H047;C9JM38;C9J286;C9J323	Cleavage and polyadenylation specificity factor subunit 7	F5H669;Q8N684;J3QT54;F5H6M0;F5H047	CPSF7	20.1016	19.7702	20.0808	21.7013	20.0052	20.4654	20.6254	20.7543	21.5538			1.48694	0.0325885	-0.993615	0.502218
Q9Y6C9;E9PIE4	Mitochondrial carrier homolog 2	Q9Y6C9;E9PIE4	MTCH2	20.8957	19.1505	21.4812	21.2354	20.7382	21.2987	21.7229	21.5629	21.1818			0.612434	0.244099	-0.980048	0.506963
P23381;H0YJP3	Tryptophan--tRNA ligase, cytoplasmic;T1-TrpRS;T2-TrpRS	P23381;H0YJP3	WARS	19.1061	19.5245	21.4827	20.6899	20.2283	22.0813	21.0495	21.0156	20.9876			0.59839	0.252121	-0.979804	0.507048
O60341;R4GMQ1;R4GMP9	Lysine-specific histone demethylase 1A	O60341;R4GMQ1;R4GMP9	KDM1A	21.3443	21.2392	20.5182	21.4401	21.0694	21.4461	21.9764	21.7185	22.3385			1.43857	0.0364278	-0.977227	0.507955
Q92896;H3BM42;H3BQU9	Golgi apparatus protein 1	Q92896;H3BM42	GLG1	18.8706	20.6578	20.2924	19.8133	20.2161	21.2336	20.804	20.9136	21.0245			0.821883	0.150701	-0.973744	0.509183
P50402;Q5HY57	Emerin	P50402;Q5HY57	EMD	19.4772	20.1375	20.2186	20.5284	20.9358	20.627	20.5327	21.0287	21.1444			1.47699	0.0333436	-0.957499	0.514949
F8W914;Q9NQC3;H7C106;A0A0U1RQR6	Reticulon;Reticulon-4	F8W914;Q9NQC3;H7C106	RTN4	22.0539	22.7593	23.0258	24.0086	22.9378	23.7081	23.3385	23.5001	23.822			1.36098	0.0435534	-0.940554	0.521033
A0A087X163;Q9NP72;Q5W0J0;H0Y6T8	Ras-related protein Rab-18	A0A087X163;Q9NP72;Q5W0J0	RAB18	20.9398	19.3548	20.217	20.827	20.7057	19.6564	21.3584	21.2205	20.7482			0.885136	0.130276	-0.938463	0.521788
P32942;K7EQC7;K7EP52;K7ERN2	Intercellular adhesion molecule 3	P32942;K7EQC7;K7EP52;K7ERN2	ICAM3	19.7345	19.1505	21.094	20.5477	20.5494	20.5064	20.9135	20.6513	21.1583			0.702342	0.198453	-0.914685	0.53046
P09669	Cytochrome c oxidase subunit 6C	P09669	COX6C	19.7849	19.2297	21.2701	20.508	21.621	20.6542	20.6373	21.2152	21.1617			0.645875	0.226009	-0.909827	0.532249
Q9UKX7;B0QY21	Nuclear pore complex protein Nup50	Q9UKX7	NUP50	20.9812	20.2578	21.2446	20.8358	22.9578	21.1443	21.6822	21.2694	22.229			1.04188	0.0908068	-0.899012	0.536254
A0A0C4DFM1;Q92544;F8WCN2;F2Z2L1	Transmembrane 9 superfamily member 4	A0A0C4DFM1;Q92544	TM9SF4	19.0113	19.9451	20.0618	20.791	21.3191	20.7592	20.3053	20.0713	21.3339			0.813185	0.15375	-0.897464	0.53683
Q7Z6Z7;H0Y659	E3 ubiquitin-protein ligase HUWE1	Q7Z6Z7	HUWE1	20.9046	20.9104	20.4181	20.7459	20.7249	20.466	21.9846	21.2237	21.6984			1.49772	0.0317893	-0.891218	0.539159
Q9NVJ2;Q96BM9	ADP-ribosylation factor-like protein 8B;ADP-ribosylation factor-like protein 8A	Q9NVJ2;Q96BM9	ARL8B;ARL8A	20.5657	20.7707	21.2876	20.27	20.4823	20.8187	22.4352	21.5247	21.3258			1.03278	0.0927306	-0.887224	0.540654
K7ER90;K7EL20;O75821;K7ENA8;K7EL60;K7EP16	Eukaryotic translation initiation factor 3 subunit G	K7ER90;K7EL20;O75821;K7ENA8	EIF3G	21.4671	17.3048	20.7621	20.7743	21.1371	19.6995	20.4201	20.6913	21.0681			0.271892	0.534697	-0.881852	0.54267
O94776	Metastasis-associated protein MTA2	O94776	MTA2	22.1157	21.9485	22.8172	22.0182	21.8116	22.3199	23.0139	23.2409	23.2704			1.46947	0.0339261	-0.881268	0.54289
A0A0A0MTB8;Q8NI36	WD repeat-containing protein 36	A0A0A0MTB8;Q8NI36	WDR36	20.2573	20.855	20.066	20.9644	22.1804	20.5627	21.5892	21.0891	21.1401			1.432	0.0369828	-0.880027	0.543357
B4DLN1;P52815;Q9UBX3	39S ribosomal protein L12, mitochondrial;Mitochondrial dicarboxylate carrier	B4DLN1;P52815;Q9UBX3	MRPL12;SLC25A10	20.284	21.1685	20.6912	21.4463	20.8709	21.1847	21.2468	22.1267	21.4038			1.10837	0.0779169	-0.877902	0.544158
Q13155;A8MU58;F8W950	Aminoacyl tRNA synthase complex-interacting multifunctional protein 2	Q13155;A8MU58;F8W950	AIMP2	21.4271	22.6508	23.1186	22.6037	20.603	21.965	23.2843	23.3708	23.1317			0.782125	0.165149	-0.86342	0.549648
Q7L2H7;J3KNJ2;E9PN86;H0YCQ8;E9PRI2;E9PRY0;E7ESM3	Eukaryotic translation initiation factor 3 subunit M	Q7L2H7;J3KNJ2	EIF3M	20.9074	20.5609	20.0148	20.4473	20.7512	20.992	21.1802	21.5794	21.3044			1.40507	0.0393485	-0.860326	0.550828
Q52LJ0	Protein FAM98B	Q52LJ0	FAM98B	21.1338	19.1982	21.8332	21.083	21.1727	21.0033	21.5984	22.0034	21.1326			0.444887	0.359015	-0.85644	0.552314
Q9NQG5;A2A2M0	Regulation of nuclear pre-mRNA domain-containing protein 1B	Q9NQG5;A2A2M0	RPRD1B	21.1062	21.2451	19.9323	21.3686	21.3737	21.348	21.6443	21.5141	21.6777			0.949398	0.112357	-0.850852	0.554457
P07476	Involucrin	P07476	IVL	21.5594	19.3013	19.0816	19.9698	21.0965	20.912	22.3536	18.5763	21.5615			0.239808	0.575695	-0.849696	0.554901
Q13200;H7C1H2;H7C2Q3;C9JPC0;F8WBS8	26S proteasome non-ATPase regulatory subunit 2	Q13200	PSMD2	21.4698	22.4823	22.7043	22.5285	21.4433	22.1214	23.0988	23.1549	22.9475			1.03489	0.0922804	-0.848268	0.555451
F5GZS6;J3KPF3;P08195;H0YFS2;F5H0E2;F5H867;F5GZI0;F5GZR9;H0YFX4	4F2 cell-surface antigen heavy chain	F5GZS6;J3KPF3;P08195;H0YFS2	SLC3A2	22.8867	23.6219	23.6573	24.129	22.4122	22.9864	24.2991	24.0835	24.3056			1.48881	0.0324485	-0.840746	0.558355
E9PQ61;O75152;E9PBY7	Zinc finger CCCH domain-containing protein 11A	E9PQ61;O75152;E9PBY7	ZC3H11A	20.3605	21.0213	18.9039	20.8175	22.0453	21.2303	20.7731	21.3585	20.6308			0.550413	0.281571	-0.825605	0.564245
Q9P0L0;J3QKM9	Vesicle-associated membrane protein-associated protein A	Q9P0L0	VAPA	20.7893	21.6474	22.299	21.3399	20.749	21.0165	22.4004	22.5022	22.295			0.865058	0.13644	-0.820618	0.566199
Q92556;C9JIW2;C9IZR8;C9J5X3;C9JB20;Q5JW01;H0YCM7;Q5JVZ5;Q96JJ3;H7C0N5;H7C0S6;H7C3P3	Engulfment and cell motility protein 1	Q92556	ELMO1	21.3501	21.33	22.4793	21.7138	21.3975	21.9802	22.5915	22.4162	22.5895			0.991803	0.101905	-0.812614	0.569349
Q5SRN7;Q5SRN5;P04439;P13746;A0A0G2JI36;A0A0G2JIF2;A0A0G2JL56;P30455;P30443;P30459;P16188;P05534;A0A140T975;A0A140T955;A0A140T933;Q9GJ45;A0A0G2JNY4;A0A140T9I0;A0A140T9X5;A0A140T913;P01893;P10314;P30457;P30453;P16190;P16189;P10316;P01892;P01891;Q09160	HLA class I histocompatibility antigen, A-3 alpha chain;HLA class I histocompatibility antigen, A-11 alpha chain;HLA class I histocompatibility antigen, A-36 alpha chain;HLA class I histocompatibility antigen, A-1 alpha chain;HLA class I histocompatibility antigen, A-74 alpha chain;HLA class I histocompatibility antigen, A-30 alpha chain;HLA class I histocompatibility antigen, A-24 alpha chain	Q5SRN7;Q5SRN5;P04439;P13746;A0A0G2JI36;A0A0G2JIF2;A0A0G2JL56;P30455;P30443;P30459;P16188;P05534	HLA-A	22.3271	22.345	23.4784	23.065	22.4467	22.4374	23.5553	23.5445	23.48			0.995368	0.101072	-0.809797	0.570462
P49721;A0A087WVV1	Proteasome subunit beta type-2	P49721;A0A087WVV1	PSMB2	21.7658	22.385	20.9193	22.4375	21.6944	21.656	22.4708	22.2787	22.7491			0.842044	0.143865	-0.809497	0.570581
A0A087WW66;Q99460;H7C378;H7BZR6;C9J9M4	26S proteasome non-ATPase regulatory subunit 1	A0A087WW66;Q99460	PSMD1	21.192	21.9944	21.9301	21.3418	22.1889	22.6422	22.8116	22.2692	22.4604			1.25429	0.055682	-0.808285	0.57106
P31153	S-adenosylmethionine synthase isoform type-2	P31153	MAT2A	21.8773	23.1235	23.3849	23.3254	22.1773	22.3694	23.5598	23.7984	23.3418			0.730904	0.185822	-0.771397	0.58585
P00505	Aspartate aminotransferase, mitochondrial	P00505	GOT2	23.399	23.1516	22.4545	23.5477	23.3923	23.4238	23.744	23.7145	23.8586			1.26375	0.0544822	-0.770658	0.58615
P61011;G3V4F7;G3V346;A0A0D9SFN7;G3V3L9;G3V480	Signal recognition particle 54 kDa protein	P61011;G3V4F7	SRP54	20.452	20.004	20.7813	19.4163	20.4719	20.6921	21.2295	20.7931	21.5264			1.16894	0.0677739	-0.770564	0.586188
P18077;C9K025;F8WBS5;F8WB72	60S ribosomal protein L35a	P18077;C9K025;F8WBS5;F8WB72	RPL35A	23.4331	23.0429	23.6976	23.5601	23.5158	24.1135	23.9408	24.2742	24.2544			1.60364	0.0249091	-0.765262	0.588347
Q92608;E5RFJ0;E7ERW7;F6S220;H0YB76;H0Y7N4;Q9H7D0	Dedicator of cytokinesis protein 2	Q92608;E5RFJ0;E7ERW7	DOCK2	22.8175	22.5595	23.5666	22.6043	22.7301	22.324	23.5808	23.6599	23.9964			1.09659	0.0800581	-0.764516	0.588651
Q8N766	ER membrane protein complex subunit 1	Q8N766	EMC1	21.9163	22.1545	20.4475	21.7794	21.8791	21.6055	22.0322	22.2168	22.531			0.611456	0.244649	-0.753923	0.592989
P31947	14-3-3 protein sigma	P31947	SFN	18.3575	21.9184	20.0977	20.1896	20.2804	20.623	21.3699	20.8132	20.4358			0.283744	0.520302	-0.748423	0.595254
B9A018;Q53GS9;A0A087X1B2;A0A087WW31;F8WC91	U4/U6.U5 tri-snRNP-associated protein 2	B9A018;Q53GS9;A0A087X1B2	USP39	20.8877	20.9197	21.2888	21.2955	21.8599	21.3538	21.7083	21.5281	22.0865			1.6246	0.0237355	-0.742221	0.597818
Q15758;M0QXM4;M0QX44	Neutral amino acid transporter B(0);Amino acid transporter	Q15758;M0QXM4	SLC1A5	21.5767	19.7065	19.7612	21.3708	21.4449	21.2363	20.9516	20.4584	21.8401			0.42705	0.374068	-0.735249	0.600714
P62314;J3QLR7;J3QLI9	Small nuclear ribonucleoprotein Sm D1	P62314	SNRPD1	23.2968	24.0415	23.2206	24.2554	24.2312	24.126	24.4788	23.8089	24.4751			1.0026	0.0994025	-0.73464	0.600968
P19174;V9GY63	1-phosphatidylinositol 4,5-bisphosphate phosphodiesterase gamma-1	P19174	PLCG1	19.7531	21.1839	20.9112	20.9021	20.8744	21.0211	21.2147	21.2119	21.6003			0.727259	0.187388	-0.726226	0.604483
F8WDS9;E9PHS0;O43813	LanC-like protein 1	F8WDS9;E9PHS0;O43813	LANCL1	19.3245	19.079	20.3387	20.6416	20.9724	20.7189	18.8548	20.8882	21.1402			0.363409	0.433102	-0.713705	0.609752
O95466;K7EJE6;A0A0A0MR62;K7EK60;Q96PY5	Formin-like protein 1	O95466;K7EJE6;A0A0A0MR62;K7EK60	FMNL1	20.3796	19.7306	19.8635	20.0036	20.922	21.4357	20.5233	20.588	21.0033			1.34265	0.0454307	-0.713683	0.609762
P50148;B1AM21;O95837;P29992	Guanine nucleotide-binding protein G(q) subunit alpha	P50148;B1AM21	GNAQ	20.8586	20.5247	20.2947	21.0145	20.8836	19.873	20.8416	21.646	21.3291			1.17392	0.0670005	-0.712893	0.610096
Q8N1F7;H3BVG0;H3BP95;H3BMX0;H3BPA9;H3BV15;H3BRD9;H3BVE2;H3BV11;H3BRI8;H3BM93	Nuclear pore complex protein Nup93	Q8N1F7;H3BVG0	NUP93	22.2832	21.8766	22.513	22.4525	22.6866	22.8213	22.697	23.1204	22.9931			1.47258	0.033684	-0.71252	0.610253
P62081;B5MCP9	40S ribosomal protein S7	P62081;B5MCP9	RPS7	23.0507	23.1707	24.2013	23.2661	23.6106	23.366	24.2081	24.1379	24.2106			0.907101	0.123851	-0.711295	0.610771
Q969X5;F2Z3Q5;F2Z2U2	Endoplasmic reticulum-Golgi intermediate compartment protein 1	Q969X5	ERGIC1	20.7342	21.6163	22.2684	21.4518	21.2064	21.3218	22.154	22.3412	22.2558			0.726551	0.187694	-0.710719	0.611016
P05387;H0YDD8	60S acidic ribosomal protein P2	P05387;H0YDD8	RPLP2	20.6518	20.5747	21.8651	20.9248	20.01	20.1284	21.4031	22.0294	21.787			0.710524	0.194749	-0.709304	0.611615
O43776;K7EMQ6;K7EIU7;K7EPK2;K7EQ35	Asparagine--tRNA ligase, cytoplasmic	O43776	NARS	21.4807	21.3355	22.1087	21.9742	21.984	21.8631	22.3957	22.2077	22.4472			1.33576	0.0461574	-0.708574	0.611925
C9JXB8;C9JNW5;P83731	60S ribosomal protein L24	C9JXB8;C9JNW5;P83731	RPL24	24.3526	23.8551	23.8402	23.8242	24.105	24.0561	24.829	24.5333	24.8065			1.66458	0.0216482	-0.706967	0.612607
A0A0A6YY92;P30566;A0A096LNY5;B4DEP1;A0A096LP72;A0A096LNY4;A0A096LNY6	Adenylosuccinate lyase	A0A0A6YY92;P30566;A0A096LNY5;B4DEP1;A0A096LP72;A0A096LNY4;A0A096LNY6	ADSL	19.1126	21.2427	22.0762	19.9756	21.4569	19.5464	21.6383	21.3079	21.5913			0.324548	0.473644	-0.701972	0.614731
P62851	40S ribosomal protein S25	P62851	RPS25	24.5131	24.0041	23.655	24.5367	23.2866	24.1756	24.6939	24.623	24.9247			1.22166	0.0600262	-0.689794	0.619942
P78417;Q5TA01;Q5TA02	Glutathione S-transferase omega-1	P78417;Q5TA01;Q5TA02	GSTO1	20.9899	21.8639	22.7895	22.3797	21.8293	22.4049	22.4782	22.8157	22.4112			0.572074	0.267871	-0.68724	0.621041
P11413;E7EUI8;E9PD92;E7EM57	Glucose-6-phosphate 1-dehydrogenase	P11413;E7EUI8	G6PD	21.5922	22.4171	22.8243	22.0462	22.3798	22.0276	22.8085	23.0601	23.0258			0.861278	0.137633	-0.686941	0.62117
Q9NYU2;H7BZG0	UDP-glucose:glycoprotein glucosyltransferase 1	Q9NYU2	UGGT1	23.6281	23.137	23.5408	23.3215	22.9094	23.3414	24.1681	24.0682	24.1299			1.95179	0.0111742	-0.686768	0.621244
A0A0U1RQF0;P49327;J3KTF0;A0A0U1RRG3	Fatty acid synthase;[Acyl-carrier-protein] S-acetyltransferase;[Acyl-carrier-protein] S-malonyltransferase;3-oxoacyl-[acyl-carrier-protein] synthase;3-oxoacyl-[acyl-carrier-protein] reductase;3-hydroxyacyl-[acyl-carrier-protein] dehydratase;Enoyl-[acyl-carrier-protein] reductase;Oleoyl-[acyl-carrier-protein] hydrolase	A0A0U1RQF0;P49327	FASN	24.5854	24.1616	24.7782	24.5636	24.2178	24.999	25.1219	25.1641	25.2927			1.64972	0.0224017	-0.684509	0.622217
P63000;P60763	Ras-related C3 botulinum toxin substrate 1;Ras-related C3 botulinum toxin substrate 3	P63000;P60763	RAC1;RAC3	21.7384	20.1155	21.9606	21.7517	22.1278	21.1277	22.0498	22.086	21.7271			0.503869	0.313423	-0.682791	0.622959
P49915	GMP synthase [glutamine-hydrolyzing]	P49915	GMPS	21.9813	22.0417	22.5822	22.1955	21.3187	21.7274	23.1581	22.9134	22.5446			1.20551	0.0623008	-0.670289	0.628381
E9PIR7;F8W809;A0A087WSW9;A0A087WSY9;Q16881;E9PRI8;E9PQI3;E9PLT3;E9PKI4;A0A0B4J225;E9PIZ5;E9PKD3;E2QRB9	Thioredoxin reductase 1, cytoplasmic	E9PIR7;F8W809;A0A087WSW9;A0A087WSY9;Q16881;E9PRI8;E9PQI3;E9PLT3;E9PKI4;A0A0B4J225;E9PIZ5;E9PKD3;E2QRB9	TXNRD1	19.3335	20.0721	19.8678	18.6576	19.1687	20.3324	20.5138	20.294	20.4703			1.35661	0.0439933	-0.668238	0.629275
O15067;H0YGH1;J3KTQ5;J3KT98	Phosphoribosylformylglycinamidine synthase	O15067	PFAS	21.8756	22.1669	21.2895	21.4624	21.9564	22.0668	22.2079	22.3157	22.8126			0.984119	0.103725	-0.66806	0.629352
Q9Y5M8;H7C4H2	Signal recognition particle receptor subunit beta	Q9Y5M8;H7C4H2	SRPRB	21.8611	21.9815	21.5942	21.6468	21.2336	21.7969	22.2141	22.7668	22.46			1.56335	0.0273306	-0.668032	0.629365
Q9UJZ1;A0A087WYB4;F2Z2I8	Stomatin-like protein 2, mitochondrial	Q9UJZ1;A0A087WYB4	STOML2	22.8696	23.425	24.4223	23.8303	23.2466	23.302	24.2919	24.1598	24.2645			0.662174	0.217684	-0.666447	0.630057
H3BTH5;H3BRB3;Q14807	Kinesin-like protein;Kinesin-like protein KIF22	H3BTH5;H3BRB3;Q14807	KIF22	19.7032	20.2253	20.4905	20.9801	20.968	19.8007	20.6893	20.8081	20.9203			1.29723	0.0504391	-0.66624	0.630147
I3L1P8;Q02978	Mitochondrial 2-oxoglutarate/malate carrier protein	I3L1P8;Q02978	SLC25A11	24.2708	23.8905	23.4624	23.995	23.9585	24.2136	24.4464	24.6762	24.4867			1.27247	0.0533989	-0.661879	0.632054
Q96AG4;I3L223	Leucine-rich repeat-containing protein 59	Q96AG4	LRRC59	22.7204	22.0384	22.7013	22.6814	22.4549	22.9828	23.1705	23.1419	23.1289			1.37307	0.0423571	-0.660384	0.63271
Q13547	Histone deacetylase 1	Q13547	HDAC1	21.676	22.4344	22.2225	21.9363	18.3381	22.7062	22.6896	22.9767	22.6435			1.24354	0.057077	-0.658916	0.633354
P13796;Q5TBN3;A0A0A0MSQ0;P13797;Q5TBN5;U3KQI3;Q14651;H7C4N2;C9JAM8	Plastin-2	P13796	LCP1	26.5636	26.4141	27.0766	26.8534	26.2174	26.5297	27.4035	27.2792	27.3468			1.49537	0.0319619	-0.658377	0.633591
H0YNE9;Q92930;H0YMN7;H0YLJ8;H0YL94;P51153;M0R257;P20337;O95716;P20336;Q96E17	Ras-related protein Rab-8B	H0YNE9;Q92930;H0YMN7	RAB8B	20.3628	21.1315	20.8496	21.2674	21.0534	19.2933	21.4694	21.4165	21.4325			1.366	0.0430531	-0.658175	0.63368
Q14166;V9GY16	Tubulin--tyrosine ligase-like protein 12	Q14166	TTLL12	21.0913	19.4811	21.6032	21.8942	22.2479	21.31	21.6758	21.1109	21.3617			0.425502	0.375403	-0.657599	0.633932
P09429;Q5T7C4;B2RPK0;P23497	High mobility group protein B1	P09429;Q5T7C4	HMGB1	23.6187	24.3333	24.5829	24.2676	23.5852	24.3979	24.5793	24.7593	25.1612			0.909214	0.12325	-0.654968	0.63509
Q93084;H3BTW4	Sarcoplasmic/endoplasmic reticulum calcium ATPase 3	Q93084	ATP2A3	21.0122	20.6897	19.2883	20.8576	20.9382	20.9133	20.7035	20.7465	21.5011			0.482248	0.329421	-0.653627	0.63568
Q9Y295;H0YI06	Developmentally-regulated GTP-binding protein 1	Q9Y295	DRG1	22.5956	21.9299	22.8035	22.4503	22.3484	22.3984	23.1442	23.0882	23.0463			1.15331	0.0702567	-0.649907	0.637321
Q06210;O94808	Glutamine--fructose-6-phosphate aminotransferase [isomerizing] 1	Q06210	GFPT1	21.442	22.2335	21.7096	22.2366	21.3002	22.0746	22.5249	22.0864	22.7157			1.02008	0.0954817	-0.647308	0.63847
Q9H0D6	5-3 exoribonuclease 2	Q9H0D6	XRN2	21.7501	21.8233	21.8572	21.9897	20.2966	21.5318	22.4444	22.076	22.8501			1.33977	0.0457334	-0.646638	0.638767
A2A2D0;P16949;E5RGX5;Q93045	Stathmin	A2A2D0;P16949	STMN1	20.3729	21.8024	22.4825	21.4757	21.7841	21.8272	22.0744	22.4338	22.0838			0.436629	0.365907	-0.644705	0.639623
P62249;M0R210;A0A087WZ27;M0R3H0;Q6IPX4;M0R1M5;M0QX76	40S ribosomal protein S16	P62249;M0R210;A0A087WZ27;M0R3H0;Q6IPX4	RPS16;ZNF90	24.696	25.0534	25.3522	24.9537	24.4435	24.9448	25.9141	25.5639	25.5498			1.34082	0.0456222	-0.642079	0.640789
O75533;B4DGZ4;H7C341;F8WC19	Splicing factor 3B subunit 1	O75533	SF3B1	23.1515	22.7353	22.3555	23.5088	23.2322	23.3936	23.5287	23.493	23.1439			1.15683	0.0696893	-0.641101	0.641224
P48449;A0A0G2JQD0;C9J315;A0A0G2JS81	Lanosterol synthase	P48449;A0A0G2JQD0	LSS	22.1508	22.1683	22.7856	22.2591	22.2315	22.5081	22.9145	23.1861	22.9251			1.32145	0.047703	-0.640355	0.641555
X6R433;A0A0A0MT22;P08575;M3ZCP1;A0A075B788;E9PKH0;A0A140TA77;A0A140TA68;A0A0G2JNW2	Protein-tyrosine-phosphatase;Receptor-type tyrosine-protein phosphatase C	X6R433;A0A0A0MT22;P08575;M3ZCP1;A0A075B788	PTPRC	23.7331	23.8844	24.4885	23.9193	23.702	23.9704	24.6634	24.6019	24.7567			1.27431	0.0531724	-0.638664	0.642307
P29401;A0A0B4J1R6;E9PFF2;F8W888;F8WAX4	Transketolase	P29401;A0A0B4J1R6;E9PFF2	TKT	24.8099	25.3965	25.4468	25.3917	25.0556	25.4761	25.8544	25.8575	25.8536			1.44851	0.035603	-0.637451	0.642848
P20042	Eukaryotic translation initiation factor 2 subunit 2	P20042	EIF2S2	21.1395	21.278	20.9744	20.8499	21.4092	21.2955	21.8439	21.576	21.8798			2.0926	0.00807978	-0.636002	0.643494
P61981	14-3-3 protein gamma;14-3-3 protein gamma, N-terminally processed	P61981	YWHAG	23.1759	22.9069	24.1706	23.6594	22.7497	23.9199	25.633	23.4116	23.114			0.290981	0.511705	-0.635031	0.643927
M0QYS1;P40429;Q8J015;Q6NVV1;M0QZU1;A0A096LPE0	60S ribosomal protein L13a	M0QYS1;P40429;Q8J015	RPL13A;RPL13a	24.9647	25.0169	24.6358	25.0483	24.7555	25.1686	25.4731	25.5586	25.4878			2.18312	0.00655958	-0.634051	0.644365
P20073	Annexin A7	P20073	ANXA7	20.423	18.9925	20.4016	20.4195	21.8812	20.2183	20.8051	20.1183	20.7929			0.531338	0.294213	-0.633109	0.644785
P09012;M0QZG7;M0R268;M0QXK2;M0R221;M0R2B8;M0R0G9;P08579	U1 small nuclear ribonucleoprotein A	P09012;M0QZG7;M0R268;M0QXK2;M0R221;M0R2B8;M0R0G9	SNRPA	21.9041	22.2351	22.7099	22.642	21.9937	22.2387	22.87	22.9265	22.9518			1.26361	0.054499	-0.633073	0.644802
F5GWX5;A0A0C4DGG9;Q14839;Q8TDI0;K7EMY3;F2Z2R5	Chromodomain-helicase-DNA-binding protein 4	F5GWX5;A0A0C4DGG9;Q14839	CHD4	22.7825	22.8432	22.3115	22.5723	22.4011	22.8939	23.1651	23.3609	23.2967			1.61882	0.0240535	-0.628494	0.646851
O14980;C9JKM9;H7BZC5;C9IZS4;C9JQ02;C9JV99;C9J673;F8WF71;C9JF49;C9IYM2	Exportin-1	O14980	XPO1	22.2118	22.3903	22.3418	22.4499	22.376	22.5108	22.8117	22.8676	23.1492			2.23236	0.00585654	-0.628202	0.646982
O15144;H7C3F9;C9JTV5;G5E9J0	Actin-related protein 2/3 complex subunit 2	O15144	ARPC2	20.0144	20.3325	21.2688	19.0585	21.1956	20.8265	21.7712	20.7916	20.9274			0.57273	0.267467	-0.624842	0.648491
P61513;G5E9R3;C9J4Z3;Q6P4E4;E9PEL3;M0R0A1;M0R2L6;A6NKH3	60S ribosomal protein L37a	P61513;G5E9R3;C9J4Z3;Q6P4E4;E9PEL3;M0R0A1;M0R2L6	RPL37A	23.5978	23.6673	22.9811	23.3369	23.3788	23.4266	23.9044	24.2211	23.9947			1.23501	0.0582096	-0.624681	0.648563
Q9H3N1;G3V448	Thioredoxin-related transmembrane protein 1	Q9H3N1	TMX1	23.7102	23.0367	23.3983	23.1684	23.3088	23.4399	23.9858	24.0508	23.9758			1.47251	0.0336893	-0.622413	0.649584
P54136;E5RJM9	Arginine--tRNA ligase, cytoplasmic	P54136	RARS	24.0195	23.5582	23.6968	24.0189	23.465	23.5976	24.3543	24.377	24.4064			1.9714	0.0106807	-0.621066	0.65019
Q12907;D6RBV2;D6RIU4;D6RDX1;D6RBH1	Vesicular integral-membrane protein VIP36	Q12907;D6RBV2;D6RIU4	LMAN2	22.5649	22.657	23.0864	23.4007	22.5522	22.5543	23.4966	23.3765	23.284			1.63575	0.0231342	-0.616278	0.652352
P57740;G3V1T4	Nuclear pore complex protein Nup107	P57740;G3V1T4	NUP107	20.9287	20.5012	21.0766	20.7889	21.656	20.8798	21.4902	20.9134	21.9418			0.825734	0.149371	-0.612937	0.653864
Q12904;D6R937	Aminoacyl tRNA synthase complex-interacting multifunctional protein 1;Endothelial monocyte-activating polypeptide 2	Q12904	AIMP1	20.8856	18.922	22.5217	19.847	22.4559	21.5645	21.2034	21.1999	21.7525			0.225226	0.595352	-0.608839	0.655724
B0QY89;Q9Y262;B0QY90;C9JHP4;C9K0Q7;H7C3A0	Eukaryotic translation initiation factor 3 subunit L	B0QY89;Q9Y262;B0QY90	EIF3L	21.7578	22.1144	22.5814	21.8083	22.5169	22.2825	22.473	22.727	23.078			0.961999	0.109144	-0.60813	0.656047
Q15006;H0YAS9	ER membrane protein complex subunit 2	Q15006;H0YAS9	EMC2	19.8739	19.5989	20.2463	20.7526	21.178	20.6434	20.5866	20.7881	20.1675			1.0909	0.0811143	-0.607732	0.656228
H7BXI1;A0A087WXU3;A0FGR8	Extended synaptotagmin-2	H7BXI1;A0A087WXU3;A0FGR8	ESYT2	22.4266	22.5596	23.1348	22.8331	22.8761	22.8663	23.3559	23.2678	23.3194			1.30065	0.0500433	-0.607391	0.656383
P04899	Guanine nucleotide-binding protein G(i) subunit alpha-2	P04899	GNAI2	24.7818	24.9233	23.8372	24.8905	24.2428	24.6947	25.2641	25.0441	25.0521			0.804139	0.156986	-0.605979	0.657025
O60264;A0A0A0MRP6;B7ZLQ5;P28370	SWI/SNF-related matrix-associated actin-dependent regulator of chromatin subfamily A member 5	O60264	SMARCA5	23.0993	22.8924	22.641	22.5434	22.7024	23.1538	23.3376	23.6263	23.4837			1.74281	0.0180798	-0.604946	0.657496
B1AHD1;P55769	NHP2-like protein 1;NHP2-like protein 1, N-terminally processed	B1AHD1;P55769	NHP2L1	23.3844	22.8107	23.4125	23.3667	23.0501	23.1675	23.7764	24.0603	23.5852			1.18568	0.0652112	-0.604726	0.657596
C9J8Q5;P51649	Succinate-semialdehyde dehydrogenase, mitochondrial	C9J8Q5;P51649	ALDH5A1	20.9828	19.5897	20.9156	20.8182	22.095	20.8326	21.2149	21.0123	21.0732			0.589709	0.257212	-0.604095	0.657884
O76003	Glutaredoxin-3	O76003	GLRX3	20.3042	21.3029	22.327	21.3645	20.9709	20.8677	22.0142	21.8037	21.9267			0.441182	0.362092	-0.6035	0.658155
P08133;E5RK69;E7EMC6;E5RFF0;H0YC77;E5RJF5;E5RK63;E5RI05;E5RJR0	Annexin A6;Annexin	P08133;E5RK69;E7EMC6	ANXA6	23.2775	23.7067	24.199	23.7888	22.4835	23.623	24.2542	24.3525	24.3774			1.04894	0.0893434	-0.600293	0.65962
P50395;Q5SX87;V9GYJ7;V9GYF8;Q5SX90;Q5SX86;Q5SX91	Rab GDP dissociation inhibitor beta	P50395;Q5SX87	GDI2	23.9146	24.0964	23.8639	24.3712	23.8317	24.1187	24.6177	24.3798	24.6765			2.19122	0.00643841	-0.599689	0.659896
Q5T4S7;X6R960;A0A0A0MSW0	E3 ubiquitin-protein ligase UBR4	Q5T4S7	UBR4	20.005	21.0033	18.8061	19.286	20.237	19.9827	20.3945	20.005	21.2131			0.340425	0.456641	-0.599387	0.660034
O00231;J3QRY4;J3QS13	26S proteasome non-ATPase regulatory subunit 11	O00231	PSMD11	22.3664	22.2278	23.3001	22.4948	21.873	22.2654	23.1584	23.3534	23.1798			0.8097	0.154989	-0.599121	0.660156
P48147	Prolyl endopeptidase	P48147	PREP	19.8677	20.1923	20.6042	20.1451	22.2385	20.4466	21.1221	20.1689	21.1666			0.700811	0.199154	-0.597795	0.660763
Q92922	SWI/SNF complex subunit SMARCC1	Q92922	SMARCC1	20.8704	21.2755	21.0303	20.1294	23.7938	21.7122	21.5184	21.6806	21.7657			1.90099	0.0125607	-0.596096	0.661542
J3KN66;A0A0A0MSK5;Q5JTV8;H0YD16;H0Y4R4;H0YDU3	Torsin-1A-interacting protein 1	J3KN66;A0A0A0MSK5;Q5JTV8	TOR1AIP1	20.9109	21.3804	21.9496	21.0464	21.1397	21.005	21.5447	22.1343	22.3491			0.706803	0.196425	-0.595723	0.661713
Q9NZL9;H7C0X7;E5RJR3	Methionine adenosyltransferase 2 subunit beta	Q9NZL9;H7C0X7	MAT2B	22.0474	19.4169	21.7209	20.141	20.106	20.1471	21.8135	22.137	21.0214			0.267017	0.540733	-0.595589	0.661774
F8WCF6;P59998;F8WDD7;A0A0A6YYG9;H7C0A3;R4GN08;F8WDW3;F8WE39	Actin-related protein 2/3 complex subunit 4	F8WCF6;P59998;F8WDD7;A0A0A6YYG9;H7C0A3	ARPC4-TTLL3;ARPC4	22.2837	23.0353	22.4653	23.0283	22.4934	22.7527	23.1584	23.1976	23.2131			1.23096	0.0587548	-0.594907	0.662087
A5YKK6;H3BMZ2;H3BVC9	CCR4-NOT transcription complex subunit 1	A5YKK6;H3BMZ2	CNOT1	20.2748	19.4245	19.1857	20.2802	21.4622	20.6364	20.3852	20.1267	20.1544			0.806477	0.156143	-0.593758	0.662615
A0A087WVQ6;Q00610;J3KS13;A0A087WX41;P53675;K7EJJ5;J3KSQ2;J3KRF5;F5H5N6	Clathrin heavy chain;Clathrin heavy chain 1	A0A087WVQ6;Q00610	CLTC	24.372	24.9562	25.1787	24.9809	24.9778	24.8205	25.3832	25.325	25.5777			1.10484	0.0785523	-0.593014	0.662956
Q96HY6;A0A0A0MRX2	DDRGK domain-containing protein 1	Q96HY6;A0A0A0MRX2	DDRGK1	20.9754	21.3056	21.6679	21.15	20.5028	21.259	22.2651	21.3004	22.1606			0.744406	0.180133	-0.59241	0.663234
Q9NUQ9;A0A087X178;Q9H0Q0;E5RK61;E5RFS4;E5RHU5;E5RGI7;E5RJE1;E5RIR8;E5RJL8;E5RI16	Protein FAM49B	Q9NUQ9;A0A087X178	FAM49B	21.8429	21.8085	21.5061	21.9574	21.7319	21.9342	22.3947	22.3328	22.2054			2.09598	0.00801714	-0.591789	0.663519
I3L0N3;P46459	Vesicle-fusing ATPase	I3L0N3;P46459	NSF	21.4611	21.9367	22.1195	21.925	21.2333	21.5772	22.3058	22.249	22.7365			1.11503	0.0767305	-0.591295	0.663747
Q5VZU9;P29144	Tripeptidyl-peptidase 2	Q5VZU9;P29144	TPP2	21.0682	21.3289	20.7779	21.2503	20.8008	21.4338	21.5175	21.6915	21.7382			1.57216	0.026782	-0.59074	0.664002
P35579;Q5BKV1;B1AH99;REV__S4R3H4;REV__E7EQT4;REV__Q9UKV3	Myosin-9	P35579	MYH9	26.8677	27.0515	27.3506	27.0854	26.6882	26.9779	27.6662	27.6394	27.7291			1.83109	0.0147541	-0.588279	0.665136
Q9Y490;Q9Y4G6;H0YMT1	Talin-1	Q9Y490	TLN1	25.3809	25.2782	25.5558	25.4096	25.2524	25.498	25.8575	25.9528	26.1644			2.07068	0.00849799	-0.586625	0.665899
S4R456;K7EM56;A0A0B4J2B4;K7EJ78;S4R417;K7EQJ5;K7ELC2;P62841	40S ribosomal protein S15	S4R456;K7EM56;A0A0B4J2B4;K7EJ78;S4R417;K7EQJ5;K7ELC2;P62841	RPS15	21.8975	20.7035	22.3728	20.6461	20.9876	20.1259	22.0148	22.62	22.0986			0.479343	0.331632	-0.586545	0.665936
O15173	Membrane-associated progesterone receptor component 2	O15173	PGRMC2	20.4544	21.4628	21.5098	21.6497	21.1829	20.6128	21.7004	21.7296	21.7564			0.785071	0.164032	-0.586454	0.665978
Q9BZE4;Q5T3R7	Nucleolar GTP-binding protein 1	Q9BZE4;Q5T3R7	GTPBP4	22.1116	21.7867	21.462	22.0694	21.8402	22.177	22.1947	22.6095	22.3071			1.22017	0.0602321	-0.583639	0.667279
I3L2B0;K7EIG1;O75153;I3L318	Clustered mitochondria protein homolog	I3L2B0;K7EIG1;O75153	CLUH	20.4096	21.3324	19.2989	20.2506	21.3883	21.0509	21.5444	20.5821	20.6624			0.366894	0.429641	-0.58263	0.667746
P53621	Coatomer subunit alpha;Xenin;Proxenin	P53621	COPA	23.8743	24.0612	23.5228	23.6729	23.6091	24.1275	24.3265	24.3603	24.5188			1.58604	0.0259394	-0.582466	0.667821
Q15393;J3QRB2;J3QL37;I3L4G7	Splicing factor 3B subunit 3	Q15393	SF3B3	24.8708	24.4638	24.9292	24.7471	24.6234	24.8738	25.3157	25.323	25.3644			1.77057	0.01696	-0.579767	0.669072
P62750;H7BY10;K7EJV9;K7ERT8;A8MUS3;K7EMA7	60S ribosomal protein L23a	P62750;H7BY10;K7EJV9;K7ERT8;A8MUS3;K7EMA7	RPL23A	25.6996	25.3264	26.1992	25.61	25.0029	25.4654	26.2056	26.3331	26.4245			1.04386	0.090395	-0.57929	0.669293
P29350;F5H0N8;F5H1V7;F5H4Z1;F5GXD4;U3KQS1;F5H5H9;F5GY79;F5H1Z8	Tyrosine-protein phosphatase non-receptor type 6	P29350	PTPN6	21.7343	21.814	21.1951	21.3392	20.9474	21.5783	22.1856	21.9993	22.2936			1.27629	0.0529307	-0.57835	0.669729
P62191;G3V4X1	26S protease regulatory subunit 4	P62191	PSMC1	21.9205	21.5896	22.4133	22.0487	22.2355	21.6563	22.7368	22.3142	22.6028			1.0028	0.0993565	-0.576817	0.670441
K2M3_SHEEP		K2M3_SHEEP		20.9794	22.2308	20.7404	19.9719	19.8981	20.473	20.7768	20.2581	24.6444			0.146902	0.713014	-0.576234	0.670712
E5RIW3;E5RJD8;O75347;E5RHG6;E5RIX8	Tubulin-specific chaperone A	E5RIW3;E5RJD8;O75347;E5RHG6	TBCA	20.6193	19.958	20.5999	21.0431	21.6778	20.4606	21.097	20.5827	21.2257			0.918663	0.120597	-0.576111	0.670769
A0A024R4M0;P46781;B5MCT8;C9JM19;F2Z3C0;A8MXK4	40S ribosomal protein S9	A0A024R4M0;P46781;B5MCT8;C9JM19	RPS9	25.3443	24.9693	25.5544	25.1286	24.9134	25.3845	25.866	25.8363	25.8926			1.54343	0.0286133	-0.575602	0.671006
P46940;A0A0J9YXZ5;H0YLE8;A0A087WWP1	Ras GTPase-activating-like protein IQGAP1	P46940;A0A0J9YXZ5;H0YLE8	IQGAP1	22.955	23.8151	23.7427	23.3827	23.4021	23.4135	24.1365	23.9668	24.1279			0.954462	0.111055	-0.57279	0.672316
P16615;H7C5W9;O14983	Sarcoplasmic/endoplasmic reticulum calcium ATPase 2	P16615;H7C5W9	ATP2A2	24.5842	23.8531	23.8683	24.4283	24.2679	24.4364	24.3774	24.6939	24.9489			0.912442	0.122337	-0.571506	0.672914
P13010;H7C0H9;C9JZ81	X-ray repair cross-complementing protein 5	P13010	XRCC5	25.2608	25.3279	25.5731	25.4512	25.0896	25.6927	25.9064	25.8992	26.058			2.19974	0.0063133	-0.567266	0.674895
Q96QK1;I3L4S0;I3L4P4	Vacuolar protein sorting-associated protein 35	Q96QK1	VPS35	22.5109	22.953	22.7293	23.1435	22.6148	22.9449	23.307	23.2281	23.3594			1.88324	0.0130845	-0.567151	0.674948
A0A0A0MRK6;Q13505;A0A0C4DFQ1	Metaxin-1	A0A0A0MRK6;Q13505;A0A0C4DFQ1	MTX1	20.4739	20.2486	20.7124	20.3945	21.2199	20.594	20.7072	21.2351	21.1898			1.23284	0.0585003	-0.56576	0.675599
P11717;S4R328	Cation-independent mannose-6-phosphate receptor	P11717	IGF2R	22.7675	22.707	22.9282	22.6998	22.801	22.8296	23.2921	23.337	23.4687			2.58187	0.00261894	-0.565003	0.675954
P11766;H0YAG8;D6RFE4;D6RAY0;D6R9G2	Alcohol dehydrogenase class-3	P11766;H0YAG8;D6RFE4	ADH5	21.6002	21.7163	22.3079	22.4053	22.0509	21.8597	22.5882	22.2453	22.4788			1.09626	0.0801201	-0.562614	0.677074
Q8NC56;D6RBV0;H0Y9B7	LEM domain-containing protein 2	Q8NC56;D6RBV0	LEMD2	18.8152	20.7569	21.1532	21.1502	21.9936	20.036	19.7503	21.0073	21.6553			0.243089	0.571361	-0.562538	0.67711
P05388;F8VWS0;F8VU65;F8VPE8;G3V210;F8VW21;F8VQY6;F8VRK7;F8VZS0;Q8NHW5;F8VS58;F8VWV4;F8W1K8	60S acidic ribosomal protein P0;60S acidic ribosomal protein P0-like	P05388;F8VWS0;F8VU65;F8VPE8;G3V210;F8VW21;F8VQY6;F8VRK7;F8VZS0;Q8NHW5	RPLP0;RPLP0P6	25.04	25.4933	25.988	25.7453	25.1744	25.6046	26.0019	25.9931	26.2132			0.928461	0.117907	-0.56234	0.677203
Q99832;F8WAM2;F8WBP8;A0A0D9SG95	T-complex protein 1 subunit eta	Q99832	CCT7	25.8071	25.9333	26.1219	26.0867	25.4973	26.1736	26.4973	26.389	26.6626			2.01114	0.00974678	-0.562216	0.677261
P61006	Ras-related protein Rab-8A	P61006	RAB8A	22.0128	22.0605	22.3815	22.8308	22.3711	22.489	22.7619	22.6376	22.7383			1.99953	0.0100107	-0.560963	0.677849
Q9UHB9	Signal recognition particle subunit SRP68	Q9UHB9	SRP68	22.7392	21.866	22.4074	22.4141	21.9865	22.5405	22.9259	22.8814	22.885			1.03154	0.0929957	-0.559914	0.678343
P33176;A0A0G2JMZ6;J3KNA1;O60282;Q12840	Kinesin-1 heavy chain	P33176	KIF5B	21.3578	21.687	22.1174	21.544	21.4561	20.9589	21.8856	22.539	22.4171			0.875553	0.133182	-0.559825	0.678385
P50991	T-complex protein 1 subunit delta	P50991	CCT4	25.8739	26.0361	26.2226	26.2133	25.6329	25.8986	26.5667	26.5334	26.698			2.10443	0.00786267	-0.555217	0.680555
Q8NBY1;B4E0Y9;Q9P289	Serine/threonine-protein kinase 26	Q8NBY1;B4E0Y9;Q9P289	STK26	21.2034	20.2862	20.689	20.6484	20.9139	20.9063	21.2487	21.489	21.1046			0.897714	0.126557	-0.554572	0.680859
Q16531;F5GY55;F5H2L3;F5GWI0;F5GZY8;F5GYG8;F5H198	DNA damage-binding protein 1	Q16531;F5GY55	DDB1	24.2572	23.538	23.7585	24.0726	23.7801	23.9438	24.3068	24.3672	24.5429			1.16261	0.0687686	-0.554359	0.68096
M0R0Y2;P54920;M0R2M1;M0R213;M0R027;M0QZM9;M0QZN5;M0R031;M0R058;A0A087WZQ7;Q9H115;M0R0I4	Alpha-soluble NSF attachment protein	M0R0Y2;P54920;M0R2M1	NAPA	20.7722	21.3489	22.1898	21.6083	19.786	22.1321	22.0441	22.215	21.7138			0.562626	0.273762	-0.55398	0.681139
Q06124	Tyrosine-protein phosphatase non-receptor type 11	Q06124	PTPN11	20.4019	20.0747	20.2325	20.3256	19.5496	21.067	20.4479	20.5066	21.4148			0.780555	0.165747	-0.553409	0.681408
A0A087X2B5;P35613;A0A087WUV8;I3L192;R4GMX5;R4GN83	Basigin	A0A087X2B5;P35613;A0A087WUV8;I3L192;R4GMX5	BSG	21.4988	21.32	22.7289	21.9804	21.3317	21.5597	22.2414	22.6405	22.3253			0.530509	0.294775	-0.55315	0.68153
Q9UQE7	Structural maintenance of chromosomes protein 3	Q9UQE7	SMC3	20.8609	20.7975	21.0134	20.3551	19.9522	20.4223	21.859	21.7775	20.6924			0.65529	0.221162	-0.55235	0.681909
P25098;E9PRV7;Q8N433;P35626	Beta-adrenergic receptor kinase 1	P25098;E9PRV7	ADRBK1	20.0114	20.544	20.3784	20.3519	20.1661	18.9529	20.594	20.8415	21.1493			1.15115	0.0706073	-0.550382	0.682839
P63010;A0A087X253;A0A087WU93;A0A087WZQ6;A0A087WYD1;K7EN71;K7ERB2;A0A087WXS3;K7EKZ5;K7EJX1	AP-2 complex subunit beta	P63010;A0A087X253	AP2B1	22.8761	22.7592	23.0292	23.1425	23.407	23.5635	23.1844	23.4641	23.6626			1.58291	0.0261271	-0.548856	0.683562
P51148;K7ERI8;K7ERQ8;F8VVK3;K7ENY4;K7EIP6	Ras-related protein Rab-5C	P51148;K7ERI8;K7ERQ8;F8VVK3;K7ENY4	RAB5C	23.0149	23.3608	23.0703	23.1525	23.056	23.4743	23.7968	23.6122	23.681			1.98759	0.0102899	-0.54799	0.683973
P08238;Q58FF7	Heat shock protein HSP 90-beta	P08238	HSP90AB1	28.5702	28.9171	29.6721	29.0412	28.6369	28.804	29.5927	29.5986	29.6054			0.772811	0.168729	-0.545773	0.685024
Q96CS3	FAS-associated factor 2	Q96CS3	FAF2	21.7047	20.1179	21.5568	20.5164	21.145	21.4522	21.798	21.338	21.8717			0.436456	0.366053	-0.542744	0.686464
P56192;F5H2V6;H0YIP0;F8VS26;F8W0M7;F8W0S4;F8VZZ9;H0YI94;H0YIC2;F8VPL7;H0YHL6;H0YI27;H0YHV5	Methionine--tRNA ligase, cytoplasmic	P56192	MARS	22.5817	22.8486	23.5182	22.9322	22.7791	22.7017	23.5018	23.3901	23.6766			0.863737	0.136856	-0.539971	0.687785
Q9NR31;X1WI22;D6RAA2;H0Y5E8;Q5SQT8;D6RDB2;D6RD69;Q9Y6B6	GTP-binding protein SAR1a;GTP-binding protein SAR1b	Q9NR31;X1WI22;D6RAA2;H0Y5E8;Q5SQT8;D6RDB2;D6RD69;Q9Y6B6	SAR1A;SAR1B	21.433	21.4607	20.8245	21.4891	20.7589	21.3318	21.6112	21.8911	21.8349			1.13037	0.0740679	-0.539621	0.687952
D3DSM0;P05107;A0A087WX36;J3KNI6;E5RHT0;E5RFI0;E5RIE4;A8MVG7;E5RIG7;E5RK25;E7EVZ9	Integrin beta;Integrin beta-2	D3DSM0;P05107;A0A087WX36	ITGB2	23.2528	23.3083	23.7686	23.4099	22.6869	23.3986	24.0911	23.9597	23.8968			1.44677	0.0357466	-0.539319	0.688095
B1AK87;B1AK88		B1AK87;B1AK88	CAPZB	23.352	23.0292	22.5319	23.1994	23.0685	23.6637	23.6106	23.5766	23.343			0.999683	0.100073	-0.539027	0.688235
P33993;C9J8M6	DNA replication licensing factor MCM7	P33993	MCM7	24.6721	24.8896	25.0056	24.6018	24.2636	25.0216	25.3685	25.3355	25.4792			2.13615	0.00730895	-0.538614	0.688432
P61106;X6RFL8	Ras-related protein Rab-14	P61106;X6RFL8	RAB14	22.8988	23.1691	23.1897	23.5443	22.9803	23.3361	23.5726	23.586	23.7109			2.18315	0.00655926	-0.537341	0.68904
P63173;J3KT73;J3QL01	60S ribosomal protein L38	P63173	RPL38	21.3455	21.8089	20.9384	21.3795	21.1518	21.3249	22.2522	21.9065	21.5399			0.757558	0.17476	-0.535261	0.690034
P53396;K7ESG8;K7EIE7	ATP-citrate synthase	P53396	ACLY	24.2509	24.6463	24.6301	24.5194	24.4114	24.652	25.1659	24.9244	25.0387			1.65683	0.022038	-0.533893	0.690688
C9JN15;E9PG73;Q13427;C9JT64;C9J679;C9JM79	Peptidyl-prolyl cis-trans isomerase;Peptidyl-prolyl cis-trans isomerase G	C9JN15;E9PG73;Q13427;C9JT64;C9J679;C9JM79	PPIG	19.1696	21.459	20.805	21.3507	22.2693	21.9776	21.0543	20.9329	21.0446			0.320268	0.478335	-0.532754	0.691234
Q6P2E9;I3L2F4	Enhancer of mRNA-decapping protein 4	Q6P2E9	EDC4	22.221	22.3973	22.9644	22.7057	22.2232	22.7307	23.1381	22.9099	23.1321			1.05796	0.087506	-0.532465	0.691372
P63092;Q5JWF2;S4R3E3;A0A087WTB6;A2A2R6;Q5JWD1;H0Y7E8;A0A087WZE5;A0A0A0MR13;Q5JWE9;H0Y7F4;P38405	Guanine nucleotide-binding protein G(s) subunit alpha isoforms short;Guanine nucleotide-binding protein G(s) subunit alpha isoforms XLas	P63092;Q5JWF2;S4R3E3	GNAS	22.4473	22.0886	22.1195	22.07	22.3455	22.5286	22.4718	23.0196	22.7577			1.275	0.0530889	-0.531233	0.691963
P26639;D6R9F8;D6RCA5;D6RDJ6	Threonine--tRNA ligase, cytoplasmic	P26639	TARS	21.6853	22.4826	22.6682	22.178	21.7425	22.0553	22.7723	22.8501	22.805			0.811908	0.154203	-0.530443	0.692342
P60228;E5RIT4;H0YBR5;E5RGA2;E5RHS5;H0YAW4;E5RIP5;E5RJ25;E5RII3	Eukaryotic translation initiation factor 3 subunit E	P60228;E5RIT4;H0YBR5;E5RGA2	EIF3E	23.4853	23.3235	22.3301	23.3672	23.0618	22.931	23.3624	23.6498	23.7177			0.633684	0.232443	-0.530358	0.692383
P62917;E9PKZ0;E9PKU4;G3V1A1;E9PP36	60S ribosomal protein L8	P62917;E9PKZ0;E9PKU4;G3V1A1;E9PP36	RPL8	24.4873	24.2983	25.8479	24.6695	24.7716	25.2763	25.2313	25.5053	25.4866			0.461464	0.34557	-0.529892	0.692607
Q14566	DNA replication licensing factor MCM6	Q14566	MCM6	24.5585	24.0385	24.7465	24.3782	24.1204	24.5368	24.9458	25.0125	24.9725			1.16998	0.0676109	-0.529075	0.692999
E7ETZ4;Q9Y6E2;E9PFD4;B5MCE7;Q75MG1;B5MCH7;E9PFE3;C9JF98;F8WDX8;E7EMS9	Basic leucine zipper and W2 domain-containing protein 2	E7ETZ4;Q9Y6E2;E9PFD4;B5MCE7;Q75MG1;B5MCH7	BZW2	22.202	20.4819	21.8296	20.4119	20.7003	19.5568	22.318	21.8041	21.9774			0.413348	0.386058	-0.528655	0.693201
P46779;H0YKD8;H0YMF4;H0YLP6	60S ribosomal protein L28	P46779;H0YKD8;H0YMF4;H0YLP6	RPL28	24.8467	24.4843	24.1828	24.157	24.5475	24.7026	25.1171	24.8892	25.0891			1.2091	0.061788	-0.527214	0.693893
P53999	Activated RNA polymerase II transcriptional coactivator p15	P53999	SUB1	22.1697	22.2838	21.9736	22.0491	21.7198	22.3296	22.8196	22.5874	22.5995			1.95426	0.0111106	-0.526475	0.694249
Q5QPK2;H0Y368;O60762	Dolichol-phosphate mannosyltransferase subunit 1	Q5QPK2;H0Y368;O60762	DPM1	19.1055	19.2236	20.0356	19.5213	22.6256	20.7436	20.2262	19.9046	19.8101			0.758993	0.174184	-0.525428	0.694753
I3L3P7;P62244;I3L246;H3BVC7;H3BV27;H3BT37;I3L303	40S ribosomal protein S15a	I3L3P7;P62244;I3L246	RPS15A	24.2081	24.5311	24.3888	24.6453	23.5819	24.341	25.0803	24.6584	24.965			1.54394	0.0285798	-0.525258	0.694835
O43175;Q5SZU1	D-3-phosphoglycerate dehydrogenase	O43175;Q5SZU1	PHGDH	25.1648	25.3113	24.7781	25.1197	24.9488	25.1765	25.6518	25.673	25.5003			1.44761	0.0356774	-0.523686	0.695592
Q00325;F8VVM2;F8VZL5;F8VWR4;F8VWQ0	Phosphate carrier protein, mitochondrial	Q00325;F8VVM2	SLC25A3	25.8237	24.6352	25.679	25.1201	25.1226	25.1612	26.0607	25.8105	25.8315			0.611293	0.244741	-0.521599	0.696599
J3QRS3;P19105;O14950;P24844;J3KTJ1	Myosin regulatory light chain 12A;Myosin regulatory light chain 12B;Myosin regulatory light polypeptide 9	J3QRS3;P19105;O14950;P24844	MYL12A;MYL12B;MYL9	21.3104	21.735	22.4855	21.7265	22.6915	21.3474	22.1479	22.5531	22.3946			0.649075	0.224349	-0.521585	0.696606
O94906	Pre-mRNA-processing factor 6	O94906	PRPF6	22.2902	22.07	22.0237	22.2371	22.2138	22.1802	22.8544	22.5569	22.5327			1.76915	0.0170158	-0.520028	0.697358
Q02880;E9PCY5	DNA topoisomerase 2-beta;DNA topoisomerase 2	Q02880;E9PCY5	TOP2B	21.5998	22.4323	21.4075	21.4898	20.8424	21.167	22.368	22.3532	22.2758			0.755618	0.175542	-0.519151	0.697782
Q8TEM1	Nuclear pore membrane glycoprotein 210	Q8TEM1	NUP210	25.6094	25.425	25.5879	25.3693	25.3613	25.6709	26.0531	25.9765	26.1492			2.60336	0.00249253	-0.518829	0.697938
P61019;H7C125	Ras-related protein Rab-2A	P61019	RAB2A	22.937	22.3218	21.7027	22.7741	22.1314	22.769	22.794	22.746	22.977			0.644761	0.226589	-0.518489	0.698103
B0I1T2;F8WEW9	Unconventional myosin-Ig;Minor histocompatibility antigen HA-2	B0I1T2	MYO1G	24.2743	24.5862	24.9329	24.4664	23.9713	24.3135	25.0706	25.093	25.1802			1.25613	0.0554454	-0.516798	0.698921
O95347;Q5T821;A0A0C4DGE5	Structural maintenance of chromosomes protein 2	O95347	SMC2	24.5882	24.7509	24.2557	24.4002	24.3871	24.4906	24.9986	25.0979	25.0483			1.59567	0.0253705	-0.516682	0.698978
P25205;J3KQ69;Q7Z6P5	DNA replication licensing factor MCM3	P25205;J3KQ69	MCM3	25.2159	25.0639	24.991	25.0701	24.9066	25.284	25.6345	25.5685	25.6172			2.76512	0.00171745	-0.51643	0.6991
P13639	Elongation factor 2	P13639	EEF2	27.216	27.1895	27.5779	27.3801	26.9786	27.1986	27.8561	27.7734	27.9025			1.77247	0.0168862	-0.516177	0.699222
P78371;F5GWF6;F8VQ14	T-complex protein 1 subunit beta	P78371;F5GWF6;F8VQ14	CCT2	25.4585	25.3533	25.6296	25.5743	25.1345	25.409	25.9134	25.9864	26.0882			2.25024	0.00562027	-0.515532	0.699535
O00303;H0YDT6;A0A0D9SEZ9	Eukaryotic translation initiation factor 3 subunit F	O00303	EIF3F	23.0405	22.4693	22.4072	22.8775	23.2874	23.2097	23.183	22.9267	23.3518			1.02239	0.0949741	-0.51485	0.699866
P26373;J3QSB4;J3KS98;H3BUK8;H3BTH3	60S ribosomal protein L13	P26373;J3QSB4	RPL13	26.1712	25.4665	25.8697	25.6544	26.0874	26.0809	26.2543	26.3185	26.4766			1.12661	0.0747122	-0.514009	0.700274
G5EA31;P53992	Protein transport protein Sec24C	G5EA31;P53992	SEC24C	21.9872	21.287	21.6039	21.4554	21.9206	21.8383	22.0691	22.1738	22.1736			1.17362	0.0670466	-0.512784	0.700869
J3KR24;P41252;A0A0A0MSX9;Q5TCC6;Q5TCD1	Isoleucine--tRNA ligase, cytoplasmic	J3KR24;P41252;A0A0A0MSX9	IARS	23.1212	23.297	23.6294	23.4843	22.7834	23.1384	23.7349	23.9196	23.9314			1.46799	0.0340417	-0.512761	0.70088
Q29RF7;H0Y9L6	Sister chromatid cohesion protein PDS5 homolog A	Q29RF7	PDS5A	21.9925	21.7209	21.5262	21.4579	22.2414	21.9386	22.1223	22.3794	22.2734			1.52971	0.0295319	-0.511852	0.701322
B3KS98;O15372;A0A087WZK9;E5RFW7;E5RFH0	Eukaryotic translation initiation factor 3 subunit H	B3KS98;O15372;A0A087WZK9	EIF3H	20.9007	20.8106	21.0801	20.9695	21.0326	22.4016	20.8239	21.548	21.9509			0.684693	0.206684	-0.510469	0.701994
P23526	Adenosylhomocysteinase	P23526	AHCY	23.9237	23.5863	24.0207	24.1134	23.9938	23.9123	24.3311	24.3758	24.3541			1.73978	0.0182062	-0.510049	0.702198
Q08722	Leukocyte surface antigen CD47	Q08722	CD47	23.337	22.7266	22.5429	23.0667	23.1769	23.4217	23.4198	23.4635	23.2519			0.95995	0.10966	-0.509569	0.702432
P30520	Adenylosuccinate synthetase isozyme 2	P30520	ADSS	21.2334	21.2748	21.0288	21.4659	20.78	21.3335	21.5038	21.5734	21.9871			1.40453	0.0393973	-0.509086	0.702667
P84077;P61204;F5H423;F5H0C7;H0YGG7	ADP-ribosylation factor 1;ADP-ribosylation factor 3	P84077;P61204;F5H423;F5H0C7	ARF1;ARF3	23.2236	23.58	22.8411	23.8014	23.517	23.5075	23.6583	23.6679	23.8433			1.07775	0.0836084	-0.50822	0.703089
F8VR82;F8VYE8;P36873;F8W0W8;A0A087WYY5	Serine/threonine-protein phosphatase;Serine/threonine-protein phosphatase PP1-gamma catalytic subunit	F8VR82;F8VYE8;P36873;F8W0W8	PPP1CC	20.0305	19.8143	20.83	20.4395	20.9599	19.9663	20.9939	20.4225	20.7812			0.65415	0.221743	-0.507572	0.703405
P62269;A0A0G2JQH2;Q5GGW2;J3JS69	40S ribosomal protein S18	P62269	RPS18	23.6543	24.335	25.0363	24.1416	23.9741	24.0951	24.8432	24.8769	24.8276			0.564401	0.272646	-0.507392	0.703493
P34932;A0A087WYC1;A0A087WTS8	Heat shock 70 kDa protein 4	P34932;A0A087WYC1;A0A087WTS8	HSPA4	24.3018	24.3769	24.7871	25.0378	24.4053	24.6938	24.8091	25.0313	25.1453			1.31613	0.0482917	-0.506603	0.703878
O95831;E9PMA0	Apoptosis-inducing factor 1, mitochondrial	O95831	AIFM1	22.4202	22.8656	23.0076	22.5808	22.3713	22.6961	23.2558	23.2945	23.2577			1.33182	0.0465782	-0.504871	0.704723
C9JRZ6;Q9NX63;F8WAR4;F8WD73	MICOS complex subunit MIC19	C9JRZ6;Q9NX63;F8WAR4	CHCHD3	22.1338	21.9517	21.7981	21.8168	21.8276	22.2407	22.4628	22.5548	22.3787			1.99941	0.0100135	-0.504239	0.705032
Q9H4E7	Differentially expressed in FDCP 6 homolog	Q9H4E7	DEF6	20.8536	20.592	20.4954	20.963	21.3219	21.1177	21.0985	21.2141	21.1396			1.96183	0.0109186	-0.503707	0.705292
V9GYM8;Q92974;V9GYF0;Q5VY93;V9GYF5;V9GYG5;V9GZ14	Rho guanine nucleotide exchange factor 2	V9GYM8;Q92974	ARHGEF2	21.8226	21.8315	22.5719	22.2015	21.2618	21.4421	22.6344	22.2799	22.8214			0.78788	0.162975	-0.503179	0.70555
Q86VP6;A0A0C4DGH5;H0YH27	Cullin-associated NEDD8-dissociated protein 1	Q86VP6;A0A0C4DGH5	CAND1	23.9793	24.014	24.5029	24.2652	23.8482	24.1349	24.6629	24.5883	24.7543			1.33913	0.0458001	-0.503108	0.705585
A0A140T8Z0;A0A0G2JH68;O60610;H9KV28;B4E2I7;E5RJ79	Protein diaphanous homolog 1	A0A140T8Z0;A0A0G2JH68;O60610;H9KV28	DIAPH1	22.5168	22.7	23.4135	22.7113	22.8785	22.5119	23.2711	23.2488	23.6173			0.775742	0.167594	-0.502322	0.70597
P78527;H0YG84	DNA-dependent protein kinase catalytic subunit	P78527	PRKDC	25.3441	25.276	25.1883	25.2966	25.173	25.5137	25.6724	25.8152	25.8241			2.77427	0.00168164	-0.501059	0.706588
P22102;F8WD69;C9JZG2;C9JKQ7;C9JBJ1;C9JTV6;A0A140TA71	Trifunctional purine biosynthetic protein adenosine-3;Phosphoribosylamine--glycine ligase;Phosphoribosylformylglycinamidine cyclo-ligase;Phosphoribosylglycinamide formyltransferase	P22102	GART	23.726	23.7225	23.8315	24.0997	23.3884	23.8205	24.1999	24.1454	24.4343			2.19483	0.0063851	-0.499868	0.707172
Q96HS1;F5GXG4	Serine/threonine-protein phosphatase PGAM5, mitochondrial	Q96HS1	PGAM5	21.7531	21.7469	22.3075	23.3889	21.9691	20.7062	22.4533	22.8555	21.9978			0.740063	0.181944	-0.499701	0.707254
G5E975;Q12824;A0A0U1RQQ2;A0A0U1RRB8;C9JTA6;A0A0G2JSE9;B5MCL5	SWI/SNF-related matrix-associated actin-dependent regulator of chromatin subfamily B member 1	G5E975;Q12824;A0A0U1RQQ2;A0A0U1RRB8;C9JTA6;A0A0G2JSE9;B5MCL5	SMARCB1	20.0996	20.5361	21.021	20.7229	21.014	22.683	21.1688	20.7912	21.1903			0.775085	0.167848	-0.497878	0.708148
P61158;B4DXW1;F8WEW2;F8WE84;F8WDR7	Actin-related protein 3	P61158;B4DXW1	ACTR3	22.7275	23.125	23.2912	23.0793	22.3617	22.8364	23.3465	23.5074	23.7801			1.11385	0.0769392	-0.496717	0.708717
P52732	Kinesin-like protein KIF11	P52732	KIF11	21.252	21.9299	20.9833	21.7277	21.4067	21.3309	21.7611	21.7398	22.1544			0.728423	0.186886	-0.496689	0.708732
Q15102;M0R389;M0QXS6;M0R323;M0QZT2;M0R1K3	Platelet-activating factor acetylhydrolase IB subunit gamma	Q15102;M0R389	PAFAH1B3	22.2642	22.0674	22.769	22.424	21.0523	22.2258	22.7712	22.9958	22.8198			1.05912	0.0872725	-0.495417	0.709357
Q9Y6A4	Cilia- and flagella-associated protein 20	Q9Y6A4	CFAP20	21.3754	21.3199	21.5522	21.4534	21.0575	21.4728	21.6909	21.948	22.0912			1.65148	0.022311	-0.494226	0.709943
P61353;K7EQQ9;K7ELC7;K7ERY7	60S ribosomal protein L27	P61353;K7EQQ9;K7ELC7	RPL27	24.6535	24.5879	24.7985	24.6412	24.5949	24.6489	25.3815	24.8648	25.2739			1.3621	0.043441	-0.493404	0.710347
P33991;E5RFJ8;E5RG31;E5RFR3;Q9UJA3	DNA replication licensing factor MCM4	P33991	MCM4	23.942	23.8694	24.1637	23.9407	23.3198	23.8801	24.4937	24.553	24.4064			2.13032	0.0074077	-0.492704	0.710692
P14868;C9J7S3;C9JLC1;H7BZ35;C9JQM9;H7C278	Aspartate--tRNA ligase, cytoplasmic	P14868	DARS	23.9056	23.8597	24.0722	24.0642	23.8525	24.4815	24.2831	24.462	24.5702			2.01842	0.00958469	-0.492577	0.710754
Q8TCJ2	Dolichyl-diphosphooligosaccharide--protein glycosyltransferase subunit STT3B	Q8TCJ2	STT3B	23.4645	23.2164	22.6841	23.4983	23.6062	23.5711	23.6372	23.6238	23.5804			1.00001	0.0999972	-0.49213	0.710974
Q99797	Mitochondrial intermediate peptidase	Q99797	MIPEP	21.0018	18.8951	20.4219	21.6966	21.2831	21.1252	19.6871	20.6836	21.4238			0.240971	0.574155	-0.491894	0.711091
P11586;F5H2F4;V9GYY3	C-1-tetrahydrofolate synthase, cytoplasmic;Methylenetetrahydrofolate dehydrogenase;Methenyltetrahydrofolate cyclohydrolase;Formyltetrahydrofolate synthetase;C-1-tetrahydrofolate synthase, cytoplasmic, N-terminally processed	P11586;F5H2F4	MTHFD1	25.3548	25.1812	25.2196	25.0296	24.8181	25.2901	25.7292	25.7044	25.7966			2.9336	0.00116521	-0.49154	0.711266
Q9ULW0	Targeting protein for Xklp2	Q9ULW0	TPX2	21.9648	22.5913	21.9168	22.3284	21.8496	22.5568	22.6733	22.4782	22.7889			0.973495	0.106293	-0.489166	0.712437
RS27A_HUMAN;P62979;J3QS39;J3QTR3;F5H6Q2;F5GYU3;F5H2Z3;F5H265;B4DV12;F5H388;F5H747;F5GXK7;J3QKN0;Q5PY61;Q96C32;P62987;P0CG47;P0CG48;M0R1V7;M0R1M6;M0R2S1;J3QSA3;F5GZ39	Ubiquitin-40S ribosomal protein S27a;Ubiquitin;40S ribosomal protein S27a;Ubiquitin-60S ribosomal protein L40;Ubiquitin;60S ribosomal protein L40;Polyubiquitin-B;Ubiquitin;Polyubiquitin-C;Ubiquitin	RS27A_HUMAN;P62979;J3QS39;J3QTR3;F5H6Q2;F5GYU3;F5H2Z3;F5H265;B4DV12;F5H388;F5H747;F5GXK7;J3QKN0;Q5PY61;Q96C32;P62987;P0CG47;P0CG48;M0R1V7;M0R1M6;M0R2S1	RPS27A;UBB;UBC;UBA52	28.4393	28.4628	27.8588	27.8943	28.3046	28.5446	28.8331	28.6423	28.7462			1.11653	0.0764666	-0.486911	0.713552
E7ES33;E7EPK1;Q16181;G3V1Q4;A0A0U1RRE1;A0A0U1RQK0;A0A0U1RRD1;Q5JXL7;A0A0U1RRM2;A0A0U1RRH9;Q6ZU15	Septin-7	E7ES33;E7EPK1;Q16181;G3V1Q4	2017-09-07	22.5779	22.6625	23.2259	22.6068	22.1415	22.3934	23.5045	23.1428	23.2787			0.996065	0.10091	-0.486554	0.713728
O43707;H7C144;F5GXS2;A0A087WSZ2;P35609;Q08043;G3V2X9;K7EJH8;G3V2E8;G3V5M4;F6THM6	Alpha-actinin-4	O43707;H7C144;F5GXS2	ACTN4	24.1411	24.3188	23.966	24.2545	23.8418	24.239	24.6394	24.6639	24.5803			2.01014	0.00976918	-0.485911	0.714046
Q93077;Q7L7L0;P04908	Histone H2A type 1-C;Histone H2A type 3;Histone H2A type 1-B/E	Q93077;Q7L7L0;P04908	HIST1H2AC;HIST3H2A;HIST1H2AB	24.1219	25.2731	24.8242	24.8458	23.1542	24.1288	25.3993	25.12	25.1546			0.630628	0.234084	-0.484868	0.714562
Q92598;A0A0A0MSM0;R4GN69;Q5TBM3	Heat shock protein 105 kDa	Q92598;A0A0A0MSM0	HSPH1	23.9691	24.1011	24.2138	24.3333	23.9276	23.999	24.4743	24.5458	24.7181			2.06025	0.00870468	-0.484725	0.714633
P49790	Nuclear pore complex protein Nup153	P49790	NUP153	21.2105	20.6531	20.9916	20.6966	20.0581	21.2067	21.4259	21.5208	21.3613			1.34335	0.0453572	-0.484347	0.714821
O15355	Protein phosphatase 1G	O15355	PPM1G	21.7032	21.8082	22.0778	21.675	19.3507	22.2879	22.3224	22.2156	22.5033			1.59088	0.0256521	-0.484076	0.714955
Q93009;H3BND8;F5H2X1;H3BUV0;H3BTM1;H3BRA2;H3BQD1	Ubiquitin carboxyl-terminal hydrolase 7;Ubiquitin carboxyl-terminal hydrolase	Q93009;H3BND8;F5H2X1	USP7	19.3285	20.5428	20.5764	21.9495	21.0252	19.8087	21.241	20.3859	20.2725			0.400208	0.397916	-0.483927	0.715029
P42285;H0YAC4;H0Y8U3	Superkiller viralicidic activity 2-like 2	P42285	SKIV2L2	21.2822	21.7798	21.211	20.9154	21.2951	21.4485	21.9191	21.7904	22.0149			1.19456	0.0638915	-0.483826	0.715079
A0A087WU53;Q9H0U3	Magnesium transporter protein 1	A0A087WU53;Q9H0U3	MAGT1	19.5744	20.3786	20.9704	20.5643	20.5703	21.2258	20.539	21.0606	20.7739			0.487327	0.325592	-0.483351	0.715314
P35580;E7ERA5	Myosin-10	P35580	MYH10	23.1936	23.3805	23.6713	23.5192	23.2493	23.5493	23.7445	23.8918	24.0553			1.36129	0.0435217	-0.482069	0.71595
C9J5N1;Q9BTE6;L7N2F4	Alanyl-tRNA editing protein Aarsd1	C9J5N1;Q9BTE6;L7N2F4	PTGES3L-AARSD1;AARSD1	21.5854	19.0401	20.6711	20.8352	21.8588	22.323	21.0217	20.8835	20.8371			0.256713	0.553716	-0.481919	0.716025
P54578;A6NJA2;J3QQT6;J3KS55;H0YA47	Ubiquitin carboxyl-terminal hydrolase 14;Ubiquitin carboxyl-terminal hydrolase	P54578;A6NJA2	USP14	23.8238	23.7655	24.0934	23.7797	23.6343	24.1342	24.1538	24.5351	24.4322			1.46184	0.0345273	-0.479476	0.717238
Q13177;A0A087X294;O75914;H7C1X3;E9PM17;B3KNX7;Q13153;B1AKS5;H0YCG5	Serine/threonine-protein kinase PAK 2;PAK-2p27;PAK-2p34	Q13177	PAK2	22.9162	22.8882	23.7323	23.0789	22.9073	23.1216	23.658	23.7989	23.5181			0.764868	0.171843	-0.479389	0.717282
X6R700;Q9Y3Y2;A0A087X1B7;Q5T7Y7	Chromatin target of PRMT1 protein	X6R700;Q9Y3Y2;A0A087X1B7	CHTOP	21.4141	20.8169	21.419	21.16	21.7048	21.2404	21.4627	21.602	22.0191			0.852225	0.140532	-0.477929	0.718007
P00403	Cytochrome c oxidase subunit 2	P00403	MT-CO2	22.329	22.8746	23.0238	22.0208	22.2823	22.6745	23.2053	23.123	23.3222			1.01703	0.0961556	-0.474377	0.719778
Q8N5K1;I3L1N9;D6RCF4	CDGSH iron-sulfur domain-containing protein 2	Q8N5K1;I3L1N9;D6RCF4	CISD2	20.5322	20.6333	20.5708	22.039	22.7009	22.8068	21.0132	20.6777	21.4633			0.964567	0.108501	-0.472635	0.720647
P51149;C9J592;C9J8S3;C9IZZ0;C9J4V0;C9J4S4;C9J7D1	Ras-related protein Rab-7a	P51149;C9J592;C9J8S3;C9IZZ0;C9J4V0	RAB7A	24.3449	24.3889	24.2984	24.5715	24.3241	24.5349	24.8049	24.7365	24.9084			2.9544	0.0011107	-0.47255	0.72069
Q9NSD9	Phenylalanine--tRNA ligase beta subunit	Q9NSD9	FARSB	22.3535	22.85	23.1103	22.4881	21.7922	22.9409	23.2925	23.0026	23.4348			0.857629	0.138794	-0.472024	0.720952
Q14152	Eukaryotic translation initiation factor 3 subunit A	Q14152	EIF3A	26.3023	25.9773	25.9944	26.3587	26.5267	26.4508	26.5383	26.4422	26.7086			1.64106	0.0228529	-0.471725	0.721102
P41240;H3BUM9;H3BU69	Tyrosine-protein kinase CSK	P41240;H3BUM9	CSK	21.9773	22.4288	21.7881	22.3106	22.5257	22.0811	22.4469	22.4893	22.6671			1.09509	0.0803362	-0.469683	0.722123
P49588;H3BPK7	Alanine--tRNA ligase, cytoplasmic	P49588	AARS	23.0968	22.4954	23.2703	22.7067	22.5441	22.8439	23.512	23.4326	23.3226			0.906225	0.124101	-0.468242	0.722845
P02786;G3V0E5;H7C3V5;F8WBE5	Transferrin receptor protein 1;Transferrin receptor protein 1, serum form	P02786;G3V0E5	TFRC	23.9746	23.8129	24.3854	24.1042	23.8561	24.2	24.5316	24.4736	24.5694			1.2695	0.0537649	-0.467205	0.723365
P20340;F5H3K7;F5GX61;Q9NRW1;C9JU14;J3KR73;C9JB90;C9J0I2;Q14964	Ras-related protein Rab-6A;Ras-related protein Rab-6B	P20340;F5H3K7;F5GX61;Q9NRW1	RAB6A;RAB6B	24.0097	24.1736	23.7626	24.1832	24.0547	23.6748	24.4555	24.4994	24.3892			1.70732	0.0196191	-0.466075	0.723931
P25685;M0R080;M0QYT3;M0QXK0;M0R1D6;M0QZD0;M0R128;Q9UDY4	DnaJ homolog subfamily B member 1	P25685;M0R080	DNAJB1	22.7419	23.1187	23.2234	23.3387	22.3903	23.0926	23.5129	23.418	23.5459			1.42898	0.0372405	-0.464293	0.724826
P04843;B7Z4L4;F8WF32	Dolichyl-diphosphooligosaccharide--protein glycosyltransferase subunit 1	P04843;B7Z4L4	RPN1	25.2123	25.2415	25.5351	25.4793	25.1073	25.1581	25.7848	25.7756	25.814			1.95009	0.0112178	-0.461854	0.726053
P23284	Peptidyl-prolyl cis-trans isomerase B	P23284	PPIB	23.5012	23.9761	23.6119	24.3632	23.5255	23.841	24.0893	24.2816	24.1037			1.3797	0.0417161	-0.461836	0.726062
P05023;M0R116;A0A0A0MT26;P13637;B1AKY9;P50993;H0Y7C1;Q13733;Q5TC01;E9PRA5;Q5TC02;M0QXF2;P20648;P54707	Sodium/potassium-transporting ATPase subunit alpha-1;Sodium/potassium-transporting ATPase subunit alpha-3	P05023;M0R116;A0A0A0MT26;P13637	ATP1A1;ATP1A3	25.2762	25.0132	24.4425	25.0135	24.7689	24.9216	25.2042	25.342	25.5664			0.793905	0.160729	-0.460248	0.726861
P06733;K7EM90;E5RI09;E5RG95;K7EPM1;K7EKN2;E5RGZ4;P13929;F5H1C3	Alpha-enolase	P06733	ENO1	27.8014	28.0132	28.3721	28.1222	27.5182	27.9612	28.5785	28.453	28.5309			1.26197	0.054706	-0.458553	0.727716
P20618	Proteasome subunit beta type-1	P20618	PSMB1	20.9265	21.4819	21.8131	21.4564	21.2661	22.0463	21.7454	22.2493	21.6025			0.637052	0.230647	-0.458548	0.727719
G5EA18;E5RJN7;A0A0A0MTC4;A0A0A0MTD1;F8VPI7;E7EPX0;A0A0A0MTC6;E7EVJ4;E9PH62;A0A0A0MTC5;Q9NUL3;E5RJ67;E7EVI1;H0YBY0	Double-stranded RNA-binding protein Staufen homolog 2	G5EA18;E5RJN7;A0A0A0MTC4;A0A0A0MTD1;F8VPI7;E7EPX0;A0A0A0MTC6;E7EVJ4;E9PH62;A0A0A0MTC5;Q9NUL3;E5RJ67;E7EVI1	STAU2	20.2136	19.4722	18.1538	20.8225	23.2245	22.8822	19.3175	20.2994	19.5968			0.274563	0.531419	-0.458028	0.727981
P48643;E7ENZ3;B7ZAR1;E9PCA1;D6RIZ7;H0Y914	T-complex protein 1 subunit epsilon	P48643;E7ENZ3;B7ZAR1;E9PCA1	CCT5	24.4862	24.2608	24.9202	24.5579	24.3325	24.2873	25.0514	24.9183	25.0586			1.0726	0.0846049	-0.453685	0.730175
Q08945;E9PMD4;A0A0U1RRK2	FACT complex subunit SSRP1	Q08945	SSRP1	23.6977	24.1691	23.6392	23.6606	23.0194	23.6409	24.2731	24.2637	24.3303			1.25985	0.0549732	-0.453674	0.730181
A0A0U1RRM4;P26599;A6NLN1;A0A0D9SF20;K7EK45;K7EKJ7;A0A087WUW5;A0A087WU68;K7ELW5;K7ES59;O95758;X6R242	Polypyrimidine tract-binding protein 1	A0A0U1RRM4;P26599;A6NLN1	PTBP1	24.5324	24.7733	25.0187	24.8571	24.843	24.571	25.078	25.282	25.3245			1.32896	0.0468862	-0.453397	0.730321
C9J3L8;C9J5W0;E9PAL7;C9IZQ1;P43307	Translocon-associated protein subunit alpha	C9J3L8;C9J5W0;E9PAL7;C9IZQ1;P43307	SSR1	21.1303	20.8171	21.2325	21.5127	20.9901	21.3054	21.5632	21.3333	21.6409			1.36077	0.043574	-0.452483	0.730784
Q9UBB4;B1AHE4;B1AHE3	Ataxin-10	Q9UBB4	ATXN10	22.5769	22.8655	22.7777	22.8037	22.5095	22.6983	23.4529	23.1487	22.9752			1.29527	0.0506671	-0.452247	0.730904
Q9H9B4;D6RFI0;D6RDG7;S4R2X2;D6RAE9	Sideroflexin-1	Q9H9B4;D6RFI0;D6RDG7;S4R2X2	SFXN1	23.8352	24.2512	24.1445	24.1811	23.5532	23.9482	24.4777	24.5518	24.5558			1.62195	0.0238807	-0.45147	0.731297
Q9H0U4;E9PLD0;Q92928;A0A087WTI1	Ras-related protein Rab-1B;Putative Ras-related protein Rab-1C	Q9H0U4;E9PLD0;Q92928	RAB1B;RAB1C	24.264	24.2949	24.5171	23.8839	24.0669	24.1998	24.687	24.7608	24.9798			1.71725	0.0191758	-0.450549	0.731764
P62424;Q5T8U3;Q5T8U2	60S ribosomal protein L7a	P62424;Q5T8U3;Q5T8U2	RPL7A	26.1882	26.1804	25.7704	26.02	25.8088	25.9676	26.3483	26.4573	26.6784			1.24737	0.0565756	-0.448298	0.732907
Q13724;C9J8D4;C9JDQ1;B8ZZE2	Mannosyl-oligosaccharide glucosidase	Q13724;C9J8D4	MOGS	21.4718	21.3675	21.2645	21.3446	21.2065	21.3041	21.6914	21.7308	22.0254			1.67964	0.0209101	-0.447905	0.733107
J3QR09;J3KTE4;P84098;J3QL15	Ribosomal protein L19;60S ribosomal protein L19	J3QR09;J3KTE4;P84098;J3QL15	RPL19	24.6983	24.3435	23.6432	24.3567	24.401	24.1994	24.6891	24.7546	24.5846			0.644176	0.226894	-0.447774	0.733173
P21964;E7EMS6;E7EUU8;F8WBW9;H7BZ45	Catechol O-methyltransferase	P21964;E7EMS6;E7EUU8;F8WBW9	COMT	20.5922	20.9642	20.7212	21.2362	20.0323	21.0717	21.537	20.8505	21.2229			0.916402	0.121227	-0.444294	0.734944
P14618;H3BTN5;B4DNK4;H3BQ34;H3BR70;H3BUW1;H3BTJ2;H3BT25;H3BU13;H3BN34;H3BQZ3;P30613	Pyruvate kinase PKM;Pyruvate kinase	P14618;H3BTN5;B4DNK4;H3BQ34	PKM	27.9175	28.1736	28.5431	28.3243	28.074	28.1558	28.5497	28.5872	28.8273			1.03409	0.0924516	-0.443316	0.735442
Q9Y265;H7C4G5;E7ETR0;J3QLR1;H7C4I3	RuvB-like 1	Q9Y265	RUVBL1	23.8556	23.7594	24.1164	24.0607	23.3665	24.0143	24.3867	24.3066	24.3635			1.80788	0.0155638	-0.441811	0.73621
P23634;P20020;E7ERY9;Q16720;H0Y7S3;Q01814	Plasma membrane calcium-transporting ATPase 4;Plasma membrane calcium-transporting ATPase 1	P23634;P20020	ATP2B4;ATP2B1	22.2897	21.8779	21.9357	21.9829	21.9672	22.268	22.3108	22.4343	22.6836			1.2274	0.0592373	-0.441802	0.736215
O43290;E9PQI8	U4/U6.U5 tri-snRNP-associated protein 1	O43290	SART1	21.8754	21.7053	21.9705	21.9158	21.8856	21.9263	21.9528	22.4017	22.5156			1.09668	0.0800417	-0.439647	0.737315
P62906	60S ribosomal protein L10a	P62906	RPL10A	24.3003	23.5531	24.6234	24.0905	24.1374	24.1653	24.8191	24.4131	24.5593			0.576589	0.265101	-0.438229	0.73804
Q01813;B1APP6;B1APP8;H0Y757;H0Y3Y3;V9GYV7;V9GY25;Q5VSR5	ATP-dependent 6-phosphofructokinase, platelet type	Q01813;B1APP6	PFKP	23.5108	23.6596	23.7323	23.6121	23.1239	23.5771	24.0513	23.9534	24.2078			1.94036	0.0114721	-0.436618	0.738865
P18669;P15259;Q8N0Y7	Phosphoglycerate mutase 1	P18669	PGAM1	23.4331	24.0211	25.0687	24.8887	23.4301	23.8913	24.5376	24.6048	24.6876			0.381293	0.41563	-0.435708	0.739331
Q9UNM6;A0A087WUL9;E9PL38;J3KNQ3;H0YD73	26S proteasome non-ATPase regulatory subunit 13	Q9UNM6;A0A087WUL9;E9PL38;J3KNQ3;H0YD73	PSMD13	21.846	21.7752	21.8333	21.7922	22.0711	21.9096	22.2305	22.3039	22.2252			3.69458	0.000202031	-0.435039	0.739674
H0YDU8;P53041;A8MU39	Serine/threonine-protein phosphatase;Serine/threonine-protein phosphatase 5	H0YDU8;P53041	PPP5C	21.4996	18.3834	21.2188	19.7953	21.5221	22.8474	20.7295	20.8521	20.8241			0.164269	0.685063	-0.434622	0.739888
Q14974;J3KTM9;J3QR48;J3QKQ5	Importin subunit beta-1	Q14974;J3KTM9	KPNB1	24.1514	24.2909	24.7809	24.378	24.1347	24.399	24.6922	24.9609	24.8717			0.984379	0.103662	-0.433854	0.740282
Q9BSJ8;F8VZB1	Extended synaptotagmin-1	Q9BSJ8	ESYT1	23.6902	23.7102	24.2066	23.6974	22.567	23.3772	24.1817	24.2859	24.4351			1.10251	0.0789755	-0.431885	0.741292
Q9UBM7;E9PJ54;E9PM00;E9PRL8;E9PQ71;E9PIP9;E9PLZ2;H0YE57	7-dehydrocholesterol reductase	Q9UBM7;E9PJ54;E9PM00	DHCR7	21.6928	20.6243	21.6457	21.4507	22.1514	22.1369	20.9628	21.9469	22.346			0.329117	0.468687	-0.43098	0.741758
Q96IX5	Up-regulated during skeletal muscle growth protein 5	Q96IX5	USMG5	22.5661	22.3987	22.4144	22.9579	22.1109	23.2037	22.7973	22.9123	22.9601			2.40446	0.00394036	-0.430199	0.742159
P60842;J3KT12;J3QS69;J3KTB5;J3KSZ0;J3QL43;J3QR64;J3KTN0;J3QLN6;J3KS25;J3QKZ9;J3QL52;J3KT04;J3KS93;J3QQP0	Eukaryotic initiation factor 4A-I	P60842;J3KT12;J3QS69;J3KTB5;J3KSZ0;J3QL43	EIF4A1	25.1866	25.6741	25.8125	25.6278	25.3941	25.4129	26.086	25.9026	25.9712			1.02075	0.0953335	-0.428834	0.742862
P09874;Q5VX84;Q5VX85	Poly [ADP-ribose] polymerase 1	P09874	PARP1	25.0163	25.3279	25.025	25.1325	24.9518	25.255	25.4638	25.4974	25.6844			1.58411	0.026055	-0.425407	0.744629
P00390;H0YC68;E5RI06	Glutathione reductase, mitochondrial	P00390	GSR	20.9739	21.121	20.9062	20.5769	20.5609	21.1194	21.2195	21.7095	21.3473			1.24838	0.056444	-0.425098	0.744788
G3V1D3;G3V180;Q9NY33;E9PQ14;E9PNX5;E9PPK9;E9PKK8	Dipeptidyl peptidase 3	G3V1D3;G3V180;Q9NY33;E9PQ14;E9PNX5;E9PPK9	DPP3	21.7046	22.4094	22.6417	22.488	21.5945	22.0581	22.615	22.8066	22.6088			0.666226	0.215662	-0.424881	0.7449
E5RI99;P62888;A0A0B4J213;E5RJH3;A0A0C4DH44	60S ribosomal protein L30	E5RI99;P62888	RPL30	24.2804	23.7937	24.5087	24.5669	23.8353	24.273	24.4966	24.6448	24.7158			0.89826	0.126398	-0.424724	0.744981
P25311;C9JEV0	Zinc-alpha-2-glycoprotein	P25311;C9JEV0	AZGP1	22.2429	21.539	21.0018	22.5191	22.3691	22.8925	21.1026	24.4262	20.5287			0.122434	0.754338	-0.424631	0.745029
Q9BUQ8;H0YI52;F8VVA2	Probable ATP-dependent RNA helicase DDX23	Q9BUQ8	DDX23	21.8537	21.9031	21.2883	22.0987	22.1056	22.0432	21.9086	22.1097	22.2967			0.86833	0.135416	-0.423318	0.745708
Q13813;A0A0D9SFF6;A0A0D9SFH4	Spectrin alpha chain, non-erythrocytic 1	Q13813	SPTAN1	24.4819	24.7242	25.5547	24.8347	24.6347	24.9367	25.2632	25.2671	25.499			0.561716	0.274337	-0.422811	0.74597
Q86YP4;C9JVY3;V9GY85;H7C3H1;C9JMI3;C9JGN4;C9JHD7;C9JJK9;V9GYX5	Transcriptional repressor p66-alpha	Q86YP4	GATAD2A	21.5211	21.6964	21.8719	21.4705	21.8958	21.8892	22.1855	21.9866	22.1845			1.60064	0.0250819	-0.422394	0.746185
O75964;E9PN17	ATP synthase subunit g, mitochondrial	O75964;E9PN17	ATP5L	23.2933	22.7712	23.9863	24.1865	22.9746	23.3073	23.7249	24.2565	23.3302			0.402174	0.396119	-0.420232	0.747304
Q15907;H3BMH2;H3BSC1;P62491;B4DQU5;M0R2D0;A0A0C4DGX5;P57735	Ras-related protein Rab-11B;Ras-related protein Rab-11A	Q15907;H3BMH2;H3BSC1;P62491	RAB11B;RAB11A	24.6063	24.2419	25.1119	24.6432	24.3277	24.5769	24.8895	25.2052	25.125			0.711754	0.194199	-0.419855	0.7475
H7C131;P09110;C9JDE9;H0Y4D4;B4DVF4	3-ketoacyl-CoA thiolase, peroxisomal	H7C131;P09110;C9JDE9	ACAA1	21.6578	21.7795	22.01	22.1837	19.7069	21.8125	22.0422	22.1924	22.4684			1.21393	0.0611045	-0.418546	0.748178
O94874	E3 UFM1-protein ligase 1	O94874	UFL1	20.2621	20.0847	20.3758	20.5678	21.8448	20.2391	20.752	20.5117	20.7126			1.68377	0.0207125	-0.417859	0.748535
Q6UN15;A0A0B4J203	Pre-mRNA 3-end-processing factor FIP1	Q6UN15;A0A0B4J203	FIP1L1	20.9142	21.7194	21.4695	21.5372	21.3298	22.0322	21.5791	21.8426	21.9224			0.729885	0.186258	-0.413634	0.75073
R4GMT0;P61163	Alpha-centractin	R4GMT0;P61163	ACTR1A	21.4965	22.0192	22.8888	22.2557	21.197	21.8017	22.6642	22.339	22.6419			0.420312	0.379916	-0.413536	0.750781
A0A0C4DG98;Q8NI27;H0Y815	THO complex subunit 2	A0A0C4DG98;Q8NI27	THOC2	19.8394	19.2512	19.5783	20.7985	20.9101	20.683	19.9042	19.9884	20.0158			1.12009	0.0758427	-0.413139	0.750988
P49368;B4DUR8;Q5SZX6;E9PRC8;Q5SZX9;E9PQ35;Q5SZW8;E9PM09	T-complex protein 1 subunit gamma	P49368;B4DUR8	CCT3	24.9444	25.2128	25.8477	25.2717	24.7624	25.0141	25.8071	25.601	25.8347			0.674386	0.211648	-0.412575	0.751281
M0R0F0;P46782;M0R0R2;M0QZN2	40S ribosomal protein S5;40S ribosomal protein S5, N-terminally processed	M0R0F0;P46782;M0R0R2;M0QZN2	RPS5	23.207	23.2172	24.492	23.7447	23.536	23.6829	24.0247	24.0918	24.0373			0.410185	0.38888	-0.412489	0.751326
P40121;E7ENU9;H7C0X8;B8ZZL6	Macrophage-capping protein	P40121;E7ENU9	CAPG	22.3493	22.5627	23.8136	22.4502	21.5355	22.7894	23.3385	23.2656	23.358			0.378121	0.418677	-0.412141	0.751508
Q92979;A0A087WVM7;V9GYP5;A0A087WWQ2	Ribosomal RNA small subunit methyltransferase NEP1	Q92979;A0A087WVM7;V9GYP5;A0A087WWQ2	EMG1	22.3221	21.9553	22.2392	22.3613	22.1996	21.5101	22.827	22.6056	22.3136			1.03716	0.0917985	-0.409853	0.7527
P14625;Q96GW1;H0YIV0;Q58FF3;F8W026	Endoplasmin	P14625	HSP90B1	25.7787	25.675	26.8427	25.9955	25.7198	25.9658	26.4315	26.6479	26.446			0.466917	0.341258	-0.409655	0.752803
P50990;H7C4C8;H7C2U0	T-complex protein 1 subunit theta	P50990	CCT8	26.5056	26.4161	26.556	26.3386	26.0526	26.6999	26.7867	27.0234	26.8891			2.15668	0.00697146	-0.407187	0.754092
E7EX73;E9PGM1;E7EUU4;Q04637;A0A0A0MR52;H7C044;H7C0V6;C9J6B6;C9J2Z7;C9K073;C9JF13;A0A0A0MSA7;A0A0U1RQK7;O43432	Eukaryotic translation initiation factor 4 gamma 1	E7EX73;E9PGM1;E7EUU4;Q04637;A0A0A0MR52	EIF4G1	23.394	22.8755	22.9515	23.5205	23.4737	23.4107	23.4221	23.431	23.5865			1.12203	0.0755043	-0.406186	0.754615
A0A087WXW3;Q9Y3P8	Signaling threshold-regulating transmembrane adapter 1	A0A087WXW3;Q9Y3P8	SIT1	20.5568	20.1441	19.8925	19.8072	20.1258	20.4279	20.355	20.9819	20.4739			0.675425	0.211142	-0.405808	0.754813
P17987;E7EQR6;E7ERF2;F5H282;F5GZ03;F5H136;F5GZI8;F5H676;F5H7Y1;F5H726;F5GYL4	T-complex protein 1 subunit alpha	P17987;E7EQR6;E7ERF2;F5H282	TCP1	26.2738	26.4227	26.5756	26.5073	26.1806	26.4647	26.7244	26.8495	26.9119			1.76499	0.0171793	-0.404588	0.755452
Q6DD88;F5H6I7;F5GWF8	Atlastin-3	Q6DD88;F5H6I7	ATL3	22.7443	23.1647	22.5667	22.0267	21.8795	22.4728	22.7184	23.2959	23.6737			0.541546	0.287378	-0.404077	0.75572
P62280;M0QZC5;M0R1H6;M0R1H5	40S ribosomal protein S11	P62280;M0QZC5	RPS11	25.5057	25.3314	26.0285	25.2188	25.0634	25.5206	25.9693	26.161	25.9462			0.851349	0.140816	-0.403617	0.755961
P52209;K7EM49;K7EMN2;K7EPF6	6-phosphogluconate dehydrogenase, decarboxylating	P52209;K7EM49;K7EMN2;K7EPF6	PGD	24.5247	24.5063	24.2928	24.1867	24.0849	24.4271	24.7281	24.7949	25.0033			1.64239	0.0227829	-0.400827	0.757424
P26583;D6R9A6	High mobility group protein B2	P26583;D6R9A6	HMGB2	22.1164	22.2489	23.5788	21.6588	21.5976	20.9719	23.1122	23.1735	22.8592			0.348369	0.448365	-0.400295	0.757703
P30153;C9J9C1;B3KQV6;E9PH38;E9PPI5;E9PNM7;E9PHZ6	Serine/threonine-protein phosphatase 2A 65 kDa regulatory subunit A alpha isoform	P30153;C9J9C1;B3KQV6	PPP2R1A	21.614	22.2616	22.3393	21.7112	21.0265	22.0465	22.5477	22.1126	22.7553			0.601756	0.250175	-0.400257	0.757723
Q9UN86;D6RGJ4;D6RAC7;D6RB17	Ras GTPase-activating protein-binding protein 2	Q9UN86	G3BP2	21.1046	21.0334	21.9134	21.3382	21.3334	21.8266	21.7776	21.3098	22.1642			0.460674	0.346199	-0.400073	0.75782
A0A087WWS1;Q96FV9;J3KT14;R4GMN4;J3KRD7;J3QQZ3;A0A087WY84	THO complex subunit 1	A0A087WWS1;Q96FV9	THOC1	20.2947	21.1916	21.0499	20.9764	21.3981	20.4983	20.8088	21.6677	21.2572			0.462617	0.344654	-0.399177	0.758291
Q86YV0;V9GYD1;M0QX12	RAS protein activator like-3	Q86YV0;V9GYD1	RASAL3	22.0323	22.1002	21.9275	21.8511	20.2904	22.0676	22.4057	22.3866	22.4632			2.70785	0.00195951	-0.398503	0.758645
P22314;Q5JRR6;Q5JRR9;Q5JRS0;Q5JRS1;Q5JRS3;Q5JRS2	Ubiquitin-like modifier-activating enzyme 1	P22314	UBA1	25.76	25.8733	26.1471	25.6716	25.2376	25.7102	26.3633	26.1952	26.4141			1.39748	0.0400423	-0.397382	0.759235
P14550;V9GYG2;V9GYP9;Q5T621	Alcohol dehydrogenase [NADP(+)]	P14550;V9GYG2;V9GYP9;Q5T621	AKR1A1	19.2304	21.2133	21.6352	22.2532	20.7189	18.884	21.0957	21.0961	21.0789			0.207278	0.620471	-0.397273	0.759292
Q99459	Cell division cycle 5-like protein	Q99459	CDC5L	22.3234	22.8239	22.871	22.7164	22.4077	22.518	23.0566	23.0664	23.0838			1.06148	0.0867992	-0.396182	0.759866
P60953;Q5JYX0;F8WET9;B1AH79;G3V4H1;G3V476;A0A0C4DH03;P17081;Q9H4E5	Cell division control protein 42 homolog	P60953;Q5JYX0	CDC42	21.6273	22.1333	22.1794	22.0237	22.5316	22.401	22.667	22.0675	22.3906			0.730977	0.18579	-0.395038	0.760469
Q9Y512	Sorting and assembly machinery component 50 homolog	Q9Y512	SAMM50	20.9001	20.3542	20.2837	21.1512	22.6342	21.1152	20.5834	21.4571	20.6821			0.512048	0.307576	-0.394904	0.76054
J3KPX7;Q99623;F5GY37;F5GWA7;F5H3X6;F5H2D2;F5H0C5;U3KPZ5	Prohibitin-2	J3KPX7;Q99623;F5GY37;F5GWA7;F5H3X6	PHB2	24.6853	24.5254	25.0748	24.6259	24.3683	24.7614	25.314	25.0744	25.0809			1.0223	0.0949949	-0.394562	0.76072
P27348;E9PG15	14-3-3 protein theta	P27348;E9PG15	YWHAQ	22.3806	22.6786	23.6721	22.7767	22.9313	22.6421	22.8528	23.7653	23.2939			0.346427	0.450373	-0.393567	0.761245
P53618;E9PP73;E9PP63;E9PKQ1	Coatomer subunit beta	P53618	COPB1	21.6782	21.1486	22.7249	21.7916	21.1548	21.1661	22.3146	21.8524	22.5644			0.31689	0.48207	-0.393209	0.761434
P68371;M0R2D3;M0R042;M0QYM7;M0R2T4	Tubulin beta-4B chain	P68371	TUBB4B	27.5213	27.7197	28.1004	27.8758	27.5422	27.8244	28.2045	28.1215	28.1925			1.07319	0.0844917	-0.392389	0.761867
E9PKG1;H7C2I1;Q99873;E9PIX6;E9PQ98;A0A087X1W2;E9PNR9;H0YDE4;Q9NR22	Protein arginine N-methyltransferase 1	E9PKG1;H7C2I1;Q99873;E9PIX6;E9PQ98;A0A087X1W2	PRMT1	22.6362	22.7647	23.0375	23.4022	23.3699	23.0584	23.0833	23.1048	23.427			1.13607	0.0731022	-0.392206	0.761964
Q14980;A0A087WY61;H0YFY6;F5H6Y5;F5H4J1;K4DIE0;F5H1L0;F5GZW1;F5H2F3;F5H3L6;F5H0Z7;F5H763;F5GWK2;F5H073;F5H068;F8W6T3	Nuclear mitotic apparatus protein 1	Q14980;A0A087WY61;H0YFY6	NUMA1	23.0079	23.2018	22.7829	22.3472	22.4731	22.3044	23.1543	23.4735	23.5355			1.08475	0.0822723	-0.390198	0.763025
P46977;A0A0C4DH80;E9PN73;E9PI32;H0YET6	Dolichyl-diphosphooligosaccharide--protein glycosyltransferase subunit STT3A	P46977	STT3A	21.6232	21.6666	21.3355	21.8119	22.2925	21.8587	21.6911	22.0973	22.0044			1.13737	0.0728837	-0.389164	0.763572
P53350;I3L2H5;I3L387;I3L309	Serine/threonine-protein kinase PLK1	P53350	PLK1	21.886	21.6469	21.222	21.831	22.4534	21.7661	21.7659	21.9787	22.1769			0.78876	0.162645	-0.388875	0.763725
Q01581;D6RIW1;P54868	Hydroxymethylglutaryl-CoA synthase, cytoplasmic	Q01581	HMGCS1	19.7027	21.2305	21.3243	20.4427	21.1342	21.3875	21.1272	20.998	21.2939			0.294638	0.507413	-0.387214	0.764605
Q99536;K7ERT7;K7ESA3;K7ENX2;K7EM19;K7EJM4;K7ER81	Synaptic vesicle membrane protein VAT-1 homolog	Q99536;K7ERT7	VAT1	24.7143	24.7057	24.8373	24.8987	24.5821	24.7897	25.054	25.1167	25.2446			2.26865	0.005387	-0.386	0.765249
E7ETK0;A0A087WUS0;P62847	40S ribosomal protein S24	E7ETK0;A0A087WUS0;P62847	RPS24	24.3798	24.6552	23.4791	24.0656	23.7369	23.9891	24.461	24.8353	24.3733			0.4309	0.370766	-0.385158	0.765695
P17252;J3KRN5;P05771;H3BV73;P05129;M0R0I9	Protein kinase C alpha type	P17252	PRKCA	22.7482	22.9984	23.4816	23.037	23.0577	23.0544	23.389	23.3512	23.6345			0.754342	0.176059	-0.382161	0.767288
P01116;P01111;G3V4K2;G3V5T7;RASH_HUMAN;P01112	GTPase KRas;GTPase KRas, N-terminally processed;GTPase NRas;GTPase HRas;GTPase HRas, N-terminally processed	P01116;P01111;G3V4K2;G3V5T7;RASH_HUMAN;P01112	KRAS;NRAS;HRAS	20.231	19.4662	20.8746	19.7837	19.8189	20.1755	19.4282	20.7599	21.5253			0.19912	0.632237	-0.380524	0.768158
P49792;F8WBP7	E3 SUMO-protein ligase RanBP2	P49792	RANBP2	22.4269	22.059	22.3556	22.1436	22.8916	22.838	22.5782	22.6892	22.7112			1.46654	0.0341556	-0.379025	0.768957
K7ENG2;P26368	Splicing factor U2AF 65 kDa subunit	K7ENG2;P26368	U2AF2	22.6442	23.1203	22.7658	23.4041	23.1776	23.3301	23.1619	23.1395	23.3556			1.11468	0.0767926	-0.375558	0.770807
P62829;C9JD32;J3KT29;B9ZVP7;J3KTJ3;J3QQT9	60S ribosomal protein L23	P62829;C9JD32;J3KT29;B9ZVP7	RPL23	24.7656	24.6224	24.7026	24.8598	24.2985	24.9601	25.2171	24.8666	25.1152			1.52261	0.0300186	-0.369431	0.774088
P17096	High mobility group protein HMG-I/HMG-Y	P17096	HMGA1	23.5008	23.3987	23.1779	23.3461	23.1722	23.5797	23.6893	23.5299	23.965			1.09212	0.0808879	-0.368928	0.774358
P39023;G5E9G0;B5MCW2;H7C422;H7C3M2;F8WCR1;Q92901	60S ribosomal protein L3	P39023;G5E9G0;B5MCW2;H7C422	RPL3	25.146	24.7113	25.2114	25.1697	25.1215	24.9511	25.4663	25.2208	25.4874			0.965743	0.108207	-0.368607	0.77453
A0A087X054;Q9Y4L1;E9PJ21;A0A087WWI4;K7EQK2;J3KTF1;Q9BST8;J3QQH7;J3QLE9;J3QL06;A0A087X214;A0A087WW13	Hypoxia up-regulated protein 1	A0A087X054;Q9Y4L1;E9PJ21;A0A087WWI4;K7EQK2	HYOU1	23.2555	23.6578	24.425	23.4928	22.4794	23.4862	24.2153	24.126	24.0978			0.459269	0.347321	-0.366919	0.775437
P13073;Q86WV2;H3BN72;H3BNV9;H3BNI5;H3BPG0	Cytochrome c oxidase subunit 4 isoform 1, mitochondrial	P13073;Q86WV2;H3BN72;H3BNV9	COX4I1	22.5676	21.8485	23.4712	22.1118	22.4089	23.0518	23.0675	22.8047	23.1123			0.311729	0.487833	-0.365726	0.776078
Q9NTZ6;A6PVI1;A6PVI0;Q5JX62	RNA-binding protein 12	Q9NTZ6	RBM12	20.7792	19.8506	19.7371	20.6963	20.8786	20.7812	20.5654	20.4439	20.4529			0.476656	0.33369	-0.365079	0.776427
O75369;E7EN95;A0A0A0MT44;A0A0C4DGA1;H7C5L4	Filamin-B	O75369;E7EN95	FLNB	24.4618	24.2203	24.2819	24.349	24.3605	24.5319	24.5069	24.7455	24.8039			1.45536	0.0350461	-0.364105	0.776951
H3BR35;P15170;H3BSV8;Q8IYD1	Eukaryotic peptide chain release factor GTP-binding subunit ERF3A	H3BR35;P15170	GSPT1	20.6285	19.79	21.1106	21.1143	23.2674	21.3982	21.0599	20.9454	20.6133			0.372556	0.424076	-0.36319	0.777444
P14174	Macrophage migration inhibitory factor	P14174	MIF	23.4039	23.837	23.4405	23.781	23.2132	23.3372	23.9414	24.0604	23.7605			1.03298	0.092688	-0.360318	0.778993
P40227;Q92526;J3KRI6	T-complex protein 1 subunit zeta	P40227	CCT6A	25.5798	25.4508	26.1069	25.6221	25.3828	25.568	26.1508	25.8445	26.2232			0.709772	0.195087	-0.360313	0.778996
Q99615;K7ESP1;K7EIH8;K7EPP7;K7ELJ8;K7EJE9;K7EK03;K7EJL5;K7EN19;K7EJV7;K7ER44	DnaJ homolog subfamily C member 7	Q99615;K7ESP1;K7EIH8;K7EPP7	DNAJC7	21.5915	21.0298	21.3874	21.0212	20.9725	20.943	21.4876	21.6989	21.9023			0.820769	0.151088	-0.36005	0.779137
P62266;D6RD47;D6RDJ2;D6RIX0;D6R9I7	40S ribosomal protein S23	P62266;D6RD47	RPS23	23.4555	23.233	24.2122	23.5496	22.9301	23.3527	24.0745	24.0416	23.8637			0.520722	0.301493	-0.359744	0.779303
O75643;B4E0P5	U5 small nuclear ribonucleoprotein 200 kDa helicase	O75643	SNRNP200	24.2476	24.2794	24.2101	24.278	24.1907	24.5189	24.6088	24.5338	24.6694			2.90636	0.00124061	-0.358307	0.78008
P04792;F8WE04;C9J3N8	Heat shock protein beta-1	P04792;F8WE04	HSPB1	20.9336	23.5839	20.7401	20.9917	20.6677	20.7002	24.1665	22.3052	19.8563			0.0813732	0.829138	-0.356772	0.78091
A8K878;P55145;H7C2D6	Mesencephalic astrocyte-derived neurotrophic factor	A8K878;P55145	MANF	21.6465	21.4454	22.6163	22.0445	21.1251	21.7327	22.0757	22.5161	22.1818			0.388781	0.408525	-0.355179	0.781773
P52292;J3QLL0;J3KS65	Importin subunit alpha-1	P52292	KPNA2	24.7838	25.0449	25.1737	25.1481	24.9651	24.9485	25.2359	25.3321	25.4976			1.20848	0.0618751	-0.354422	0.782183
P22528	Cornifin-B	P22528	SPRR1B	24.1398	23.1146	21.9368	23.078	23.6765	23.1384	24.2052	24.6498	21.3982			0.106363	0.782774	-0.353971	0.782428
Q9Y2Z0	Suppressor of G2 allele of SKP1 homolog	Q9Y2Z0	SUGT1	19.5822	21.0714	22.1005	20.9222	21.071	20.3	21.1057	21.4271	21.2819			0.182819	0.656419	-0.353556	0.782652
P06400	Retinoblastoma-associated protein	P06400	RB1	22.2992	21.8695	22.05	22.2248	22.1125	21.9719	22.4905	22.5995	22.1892			0.945789	0.113295	-0.353503	0.782681
Q9NTJ5;E9PGZ4;C9JV50;F8WDN7;F8WCQ2;C9J3E3	Phosphatidylinositide phosphatase SAC1	Q9NTJ5;E9PGZ4	SACM1L	22.2418	21.1326	21.99	21.7188	21.0029	21.6659	22.4091	21.8946	22.1209			0.408423	0.390461	-0.353357	0.78276
Q9UQ80;F8VR77;F8W0A3;H0YIN7;F8VZ69	Proliferation-associated protein 2G4	Q9UQ80;F8VR77	PA2G4	23.9403	23.962	24.482	23.9286	23.9048	23.7602	24.5078	24.5209	24.4128			0.912361	0.12236	-0.352395	0.783283
P49257	Protein ERGIC-53	P49257	LMAN1	23.0818	22.8863	23.3681	22.8813	23.1179	23.0219	23.386	23.4273	23.5799			1.0909	0.0811155	-0.35232	0.783324
P61247;D6RG13;D6RAT0;H0Y9Y4;E9PFI5;D6RB09;H0Y8L7;D6R9B6;D6RAS7;D6RI02;D6RED7;D6RGE0	40S ribosomal protein S3a	P61247;D6RG13;D6RAT0;H0Y9Y4;E9PFI5;D6RB09;H0Y8L7;D6R9B6	RPS3A	25.3957	25.1102	25.7116	25.2996	25.1126	25.3726	25.7005	25.7046	25.8668			0.900282	0.125811	-0.351479	0.78378
Q60FE5;P21333;Q5HY54;A0A087WWY3;F8WE98;H0Y5C6;H0Y5F3	Filamin-A	Q60FE5;P21333;Q5HY54;A0A087WWY3	FLNA	26.9286	26.8643	26.9887	27.1276	26.9216	27.1108	27.1592	27.2461	27.4301			1.7965	0.015977	-0.351271	0.783893
P49755;G3V2K7	Transmembrane emp24 domain-containing protein 10	P49755;G3V2K7	TMED10	21.9945	22.0752	22.7395	22.7296	21.9008	22.5294	22.7198	22.6481	22.4937			0.646129	0.225877	-0.350789	0.784155
P00558;P07205	Phosphoglycerate kinase 1	P00558	PGK1	26.475	26.6195	27.3536	26.8896	26.1644	26.4982	27.0954	27.1515	27.2531			0.564377	0.272661	-0.350632	0.78424
O14745;J3QRP6	Na(+)/H(+) exchange regulatory cofactor NHE-RF1	O14745;J3QRP6	SLC9A3R1	21.4672	22.0585	22.7023	21.8789	22.0022	21.9062	22.5341	22.4049	22.3323			0.408339	0.390536	-0.347764	0.785801
P61964	WD repeat-containing protein 5	P61964	WDR5	20.1589	19.6923	20.0315	20.5611	21.4984	20.3462	20.8842	20.5908	19.4425			0.304288	0.496263	-0.344939	0.787341
Q9NTI5;A9IYQ1	Sister chromatid cohesion protein PDS5 homolog B	Q9NTI5	PDS5B	22.1068	21.067	19.2308	21.3423	22.182	20.5735	21.0122	21.1352	21.2915			0.152385	0.704068	-0.344743	0.787448
A0A0C4DGG8;Q8IX12;F5H3E1;F5H1H2;F5H2E6	Cell division cycle and apoptosis regulator protein 1	A0A0C4DGG8;Q8IX12;F5H3E1;F5H1H2;F5H2E6	CCAR1	20.6727	20.4632	20.3264	20.3811	20.8251	19.3868	20.7627	20.7783	20.9508			1.36577	0.0430752	-0.34316	0.788313
P15880;H0YEN5;E9PQD7;E9PMM9;I3L404;E9PM36;E9PPT0	40S ribosomal protein S2	P15880;H0YEN5;E9PQD7;E9PMM9	RPS2	25.1605	25.7659	25.97	25.5683	25.1851	25.5557	25.9684	25.8761	26.068			0.609382	0.24582	-0.338701	0.790753
P23396;E9PL09;E9PPU1;F2Z2S8;H0YEU2;H0YCJ7;E9PQ96;E9PJH4;H0YF32;E9PK82;E9PSF4;E9PQX2;H0YES8;E9PJN9	40S ribosomal protein S3	P23396;E9PL09;E9PPU1;F2Z2S8;H0YEU2;H0YCJ7	RPS3	27.1785	27.1856	27.13	27.3669	26.9775	27.124	27.4372	27.5017	27.5707			2.87835	0.00132328	-0.338512	0.790856
K7ES31;K7ERF1;Q9UBQ5	Eukaryotic translation initiation factor 3 subunit K	K7ES31;K7ERF1;Q9UBQ5	EIF3K	20.0994	20.1983	20.1951	20.451	20.3258	21.9653	20.3982	20.6086	20.4999			2.09701	0.00799809	-0.337954	0.791162
Q01518;Q5T0R7;Q5T0R6;Q5T0R5;Q5T0R4;Q5T0R3;Q5T0R2;Q5T0R1;Q5T0R9;B7Z385;A0A087X0J3;A0A087WZ15;E9PDI2;P40123	Adenylyl cyclase-associated protein 1	Q01518	CAP1	22.8363	22.7312	23.4043	23.1998	23.0091	23.4255	23.3562	23.2706	23.3574			0.73271	0.185051	-0.337468	0.791429
P27797;K7EJB9;K7EL50	Calreticulin	P27797;K7EJB9	CALR	21.4308	22.2253	23.6625	22.3595	23.4355	21.348	22.9628	22.7189	22.6493			0.196489	0.636079	-0.337438	0.791446
C9JTN7;F8W8I6;Q01085;P31483;F8WE16;E7ETC0;E5RGV5;E5RG67	Nucleolysin TIAR;Nucleolysin TIA-1 isoform p40	C9JTN7;F8W8I6;Q01085;P31483;F8WE16;E7ETC0;E5RGV5;E5RG67	TIA1;TIAL1	17.6939	20.1685	20.512	20.2754	20.7622	19.743	20.0714	19.7207	19.5927			0.138488	0.726963	-0.336833	0.791777
P08670;B0YJC4;B0YJC5;Q5JVS8;P17661;H7C5W5	Vimentin	P08670;B0YJC4	VIM	24.6033	24.8968	26.0209	25.2905	25.0439	24.992	25.4371	25.5605	25.5335			0.318046	0.480788	-0.336732	0.791833
P31939;C9JLK0;H7C1S2;F8WEF0	Bifunctional purine biosynthesis protein PURH;Phosphoribosylaminoimidazolecarboxamide formyltransferase;IMP cyclohydrolase	P31939	ATIC	24.8353	24.8759	25.2998	24.9338	24.5853	24.6749	25.275	25.3391	25.4067			1.03076	0.0931633	-0.336582	0.791915
Q15021;E7EN77;F5H431;F5GZK7	Condensin complex subunit 1	Q15021	NCAPD2	21.4187	20.774	20.1696	18.8469	20.9335	20.7815	21.1655	20.6382	21.5679			0.304232	0.496327	-0.336384	0.792024
O43242	26S proteasome non-ATPase regulatory subunit 3	O43242	PSMD3	23.0802	23.1342	22.9937	23.3879	22.8959	23.3178	23.2002	23.4847	23.5206			1.41671	0.0383085	-0.332488	0.794166
Q9BXP5;H7C3A1;H7C1K0;H7C0U8	Serrate RNA effector molecule homolog	Q9BXP5;H7C3A1	SRRT	21.5716	21.7423	21.3204	21.3267	21.6334	21.9016	21.826	21.8956	21.9088			1.24533	0.0568423	-0.332013	0.794427
Q9Y320	Thioredoxin-related transmembrane protein 2	Q9Y320	TMX2	20.2111	20.442	20.3462	20.4278	21.1972	20.1257	20.8028	20.5379	20.6528			1.50528	0.0312404	-0.33138	0.794776
O43143	Pre-mRNA-splicing factor ATP-dependent RNA helicase DHX15	O43143	DHX15	24.6191	24.5613	24.0841	24.6314	24.7464	24.6498	24.6181	24.6921	24.9473			0.775498	0.167688	-0.330999	0.794986
Q12788;J3KNP2;A0A087WYP7	Transducin beta-like protein 3	Q12788;J3KNP2;A0A087WYP7	TBL3	20.9556	21.9708	21.5523	21.441	21.827	22.0764	21.8628	21.8393	21.7683			0.486092	0.326519	-0.330594	0.795209
E9PL69;P23921	Ribonucleoside-diphosphate reductase large subunit	E9PL69;P23921	RRM1	21.0305	21.3658	21.5776	21.3193	19.5542	21.0606	21.6574	21.6594	21.647			0.970283	0.107082	-0.329969	0.795554
P13667;C9JMN9	Protein disulfide-isomerase A4	P13667	PDIA4	23.3056	23.3214	24.29	23.6415	23.3915	23.6435	24.0361	24.2487	23.6219			0.36899	0.427573	-0.329841	0.795624
Q04917;A2IDB2;F8WEB6;A2IDB1	14-3-3 protein eta	Q04917	YWHAH	20.5881	19.9923	23.0383	21.1597	20.9146	20.7786	21.8788	21.2694	21.4593			0.127304	0.745926	-0.329598	0.795758
P39748;I3L3E9;F5H1Y3	Flap endonuclease 1	P39748;I3L3E9;F5H1Y3	FEN1	23.2171	23.1093	23.0378	23.4437	22.8914	23.2142	23.3117	23.5568	23.4835			1.6752	0.0211254	-0.329311	0.795917
Q8N1G4	Leucine-rich repeat-containing protein 47	Q8N1G4	LRRC47	21.0048	21.3845	22.1277	21.6492	21.2862	21.195	21.7913	21.7115	22.0014			0.409928	0.38911	-0.329056	0.796057
A0A087X2I1;P62333;H0YJC0;H0YJS8;H0YJE9;H0YJT1	26S protease regulatory subunit 10B	A0A087X2I1;P62333;H0YJC0	PSMC6	19.3705	20.4426	20.9762	20.2979	19.9092	20.8078	20.5256	20.6217	20.6286			0.27949	0.525424	-0.328873	0.796158
P49189	4-trimethylaminobutyraldehyde dehydrogenase	P49189	ALDH9A1	21.2373	21.2578	21.0141	21.4461	21.7253	21.6766	21.8861	20.9781	21.6297			0.511344	0.308075	-0.328229	0.796514
Q13838;Q5STU3;A0A0G2JJZ9;F6S4E6;A0A0A0MT12;F6TRA5;F6WLT2;A0A140T9X3;A0A140T9L4;A0A140T973;A0A140T9K1;F6QYI9;A0A0G2JJL7;A0A140T996;F6R6M7;K7EN69;A0A140T9X9;H0Y400;F6UJC5;A0A140TA18;A0A140T9K2;K7ENP6;A0A0G2JHN7;A0A140T9N3;K7EL56;K7EIL8;F6U6E2;F6S2B7;F6SXL5	Spliceosome RNA helicase DDX39B	Q13838;Q5STU3;A0A0G2JJZ9;F6S4E6;A0A0A0MT12;F6TRA5;F6WLT2;A0A140T9X3	DDX39B	24.3619	24.0278	24.8102	24.3663	24.1706	24.7537	24.7026	24.6637	24.8176			0.639905	0.229137	-0.32804	0.796618
P50416;H3BMD2;H3BUJ0;H3BP22;H3BUV7	Carnitine O-palmitoyltransferase 1, liver isoform	P50416	CPT1A	23.0395	22.3694	23.1312	22.8882	22.8379	22.5112	23.2219	23.0861	23.2152			0.600933	0.250649	-0.327697	0.796807
P38606;C9JA17;C9JVW8	V-type proton ATPase catalytic subunit A	P38606	ATP6V1A	20.9546	21.4013	21.5539	21.1258	23.5237	20.9862	21.4758	21.9229	21.4935			0.637319	0.230505	-0.327462	0.796937
P55265;H0YCK3	Double-stranded RNA-specific adenosine deaminase	P55265;H0YCK3	ADAR	21.7241	21.7919	22.1049	22.0591	21.6317	22.117	21.9663	22.2337	22.403			0.881539	0.131359	-0.327354	0.796997
P07195;A8MW50;C9J7H8;F5H793;F5H5G7;F5H155;A0A087WUM2;G3XAP5;F5H245;Q6ZMR3;P07864	L-lactate dehydrogenase B chain;L-lactate dehydrogenase	P07195;A8MW50;C9J7H8	LDHB	26.8053	26.7334	27.0304	26.8158	26.4869	26.8634	27.0264	27.3387	27.1816			1.20581	0.0622578	-0.325871	0.797816
O00299	Chloride intracellular channel protein 1	O00299	CLIC1	24.274	24.2914	25.1776	24.8184	24.0189	24.3244	24.9696	24.8534	24.8912			0.466297	0.341746	-0.323698	0.799019
B1AHB1;P33992;B1AHB2;B1AHA9	DNA helicase;DNA replication licensing factor MCM5	B1AHB1;P33992	MCM5	24.2307	24.3398	24.5638	24.4257	23.902	24.4085	24.7655	24.6712	24.6679			1.4557	0.0350189	-0.323402	0.799183
Q14318;U3KQ64;A0A0A0MTJ1;U3KQI1;M0R2K9	Peptidyl-prolyl cis-trans isomerase FKBP8	Q14318;U3KQ64;A0A0A0MTJ1	FKBP8	21.6044	21.8767	23.0261	22.348	21.3258	22.0144	22.4786	22.3463	22.6516			0.294494	0.507582	-0.323132	0.799333
Q15459;H7C1L2;F8WC79;F8WB66	Splicing factor 3A subunit 1	Q15459	SF3A1	22.8213	23.1913	23.4912	23.3685	23.0588	23.1847	23.3342	23.4427	23.6914			0.659593	0.218981	-0.321447	0.800267
E9PCT1;A9Z1X7;Q8IYB3;M0R1E7;M0R088	Serine/arginine repetitive matrix protein 1	E9PCT1;A9Z1X7;Q8IYB3;M0R1E7	SRRM1	21.7711	21.6943	20.7628	21.4485	20.8554	22.7295	21.7402	21.7894	21.6619			0.419497	0.38063	-0.321114	0.800451
P62753;A2A3R5;A2A3R7	40S ribosomal protein S6	P62753;A2A3R5	RPS6	25.6761	25.9736	25.6594	25.8954	25.5201	25.7355	26.0413	26.1066	26.1237			1.42078	0.0379506	-0.320822	0.800614
P49736;H0Y8E6	DNA replication licensing factor MCM2	P49736;H0Y8E6	MCM2	24.3877	24.2874	24.4007	24.3038	24.3175	24.4762	24.5517	24.7153	24.7601			1.91808	0.0120759	-0.317102	0.802681
Q13263;M0R0K9;M0R3C0	Transcription intermediary factor 1-beta	Q13263;M0R0K9	TRIM28	23.6867	24.0517	24.5888	24.2375	23.5784	23.9143	24.2883	24.3767	24.6099			0.493795	0.320779	-0.315908	0.803345
O95573	Long-chain-fatty-acid--CoA ligase 3	O95573	ACSL3	21.5795	21.6135	22.2997	21.9134	21.6893	21.7915	22.3406	21.5952	22.5017			0.360012	0.436504	-0.314939	0.803885
A0A0A0MT49;Q9HBD4;P51532;F6VDE0;P51531;A0A0U1RRF5;A0A0U1RRD6;A0A0U1RRF8;A0A0A0MSS5;F6UH26;A0A0U1RQU0;A0A0U1RR09;F6XE55;A0A0U1RQW7;A0A0U1RRN2;B1ALG1;A0A0U1RR83;A0A0U1RQX3;F6T8Q0;B1ALG2;A0A0U1RR26;A0A0U1RRG6;B4DNT1;B1ALF6;A0A0U1RQZ9	Transcription activator BRG1	A0A0A0MT49;Q9HBD4;P51532	SMARCA4	21.5114	21.5542	21.9599	21.1533	21.3462	20.742	21.9268	21.877	22.1653			0.86952	0.135046	-0.314538	0.804109
P11142;E9PKE3;E9PNE6;E9PN89;A8K7Q2;E9PLF4;E9PQQ4;E9PQK7;E9PK54;E9PPY6;E9PN25;E9PI65;E9PS65;E9PM13	Heat shock cognate 71 kDa protein	P11142;E9PKE3;E9PNE6;E9PN89;A8K7Q2	HSPA8	28.9433	28.892	29.4594	29.055	28.8434	28.9974	29.4212	29.292	29.5214			0.745188	0.179809	-0.3133	0.804799
P62277;J3KMX5;E9PS50	40S ribosomal protein S13	P62277;J3KMX5	RPS13	24.4739	23.8928	25.1714	24.0119	24.2723	24.545	25.0926	24.8361	24.5404			0.315395	0.483732	-0.310366	0.806437
A0A0G2JIW1;P0DMV9;P0DMV8;V9GZ37	Heat shock 70 kDa protein 1B;Heat shock 70 kDa protein 1A	A0A0G2JIW1;P0DMV9;P0DMV8	HSPA1B;HSPA1A	22.718	23.0599	23.2519	22.8213	22.6737	23.0256	23.4947	23.1982	23.2558			0.782238	0.165106	-0.306341	0.80869
O14818;H0Y586;Q8TAA3;A0A087WYS6;F5GY34	Proteasome subunit alpha type-7;Proteasome subunit alpha type-7-like	O14818;H0Y586;Q8TAA3	PSMA7;PSMA8	24.3399	24.448	23.8804	24.5683	24.2384	24.3827	24.5241	24.6942	24.361			0.69603	0.201359	-0.303656	0.810196
Q13596;H0YK42;H0YK43	Sorting nexin-1	Q13596;H0YK42	SNX1	21.0964	21.2794	20.8359	21.1845	21.0356	21.3052	21.2381	21.2868	21.592			0.823444	0.150161	-0.301746	0.81127
P36915;A2AB27;A0A140T8Y2	Guanine nucleotide-binding protein-like 1	P36915;A2AB27;A0A140T8Y2	GNL1	20.756	19.7968	19.4559	22.9207	22.3175	21.434	21.4463	19.4451	20.0215			0.159021	0.693393	-0.301352	0.811491
P62805	Histone H4	P62805	HIST1H4A	30.6248	30.953	30.6182	30.5404	29.9932	30.2719	31.2656	30.9708	30.8623			0.855359	0.139521	-0.300924	0.811732
P30050	60S ribosomal protein L12	P30050	RPL12	25.4331	25.314	26.0422	25.6134	25.0372	25.7791	25.7137	25.9505	26.022			0.54109	0.28768	-0.298961	0.812838
P10515;H0YDD4;E9PEJ4	Dihydrolipoyllysine-residue acetyltransferase component of pyruvate dehydrogenase complex, mitochondrial;Acetyltransferase component of pyruvate dehydrogenase complex	P10515;H0YDD4;E9PEJ4	DLAT	23.0556	22.969	23.1491	23.1284	22.8835	23.1157	23.275	23.2942	23.5007			1.54636	0.0284213	-0.29873	0.812968
Q9Y277;E5RJN6;E5RHZ6;E5RFP6;E5RHE1;E5RK27;E5RFL1	Voltage-dependent anion-selective channel protein 3	Q9Y277;E5RJN6;E5RHZ6;E5RFP6	VDAC3	23.8773	23.66	24.7629	24.2357	24.0045	23.7103	24.5994	24.2977	24.2974			0.351875	0.444759	-0.29808	0.813334
P61009	Signal peptidase complex subunit 3	P61009	SPCS3	20.01	20.4388	21.4487	20.0371	21.3382	22.1968	20.9365	21.1115	20.7386			0.269687	0.537419	-0.29634	0.814316
P35606;D6R997;D6RBZ7;D6RCL6;D6RBG7;D6RBT6;H0YAC7	Coatomer subunit beta	P35606	COPB2	23.8428	23.9418	23.7824	24.0542	24.1321	24.1855	24.15	24.239	24.0668			1.91623	0.0121276	-0.296284	0.814347
P46777;Q5T7N0	60S ribosomal protein L5	P46777	RPL5	24.6015	24.6606	25.5005	24.902	24.9444	25.0487	25.2503	25.3046	25.0956			0.425579	0.375337	-0.295989	0.814514
M0R117;Q02543;M0R3D6;M0R1A7;M0R0P7	60S ribosomal protein L18a	M0R117;Q02543;M0R3D6;M0R1A7;M0R0P7	RPL18A	25.4408	25.4431	25.5861	25.5783	25.7543	25.5059	25.7716	25.7668	25.819			2.36153	0.00434981	-0.295774	0.814635
K7EL40;Q9UHD8;K7EK18;K7ER52;K7EIE4;K7EQD7;K7ELJ9;K7EIR4;K7EKN4;K7EN52;K7ENQ5;K7EJZ2;K7ER14	Septin-9	K7EL40;Q9UHD8;K7EK18;K7ER52;K7EIE4;K7EQD7;K7ELJ9	2017-09-09	22.7022	22.6968	23.6769	22.8101	22.0646	22.5096	23.3938	23.3306	23.2334			0.37439	0.422289	-0.293941	0.815671
Q9NTJ3;E9PD53;C9JR83;C9JVD8;C9J578;C9J9E4;C9JWF0;C9IYK2;C9JJ64	Structural maintenance of chromosomes protein 4;Structural maintenance of chromosomes protein	Q9NTJ3;E9PD53	SMC4	23.4833	23.2639	23.0466	23.2961	22.8585	23.1968	23.762	23.3419	23.5702			0.772253	0.168946	-0.293465	0.81594
Q86UE4;E5RJU9;H0YBJ8;H0YB56	Protein LYRIC	Q86UE4;E5RJU9	MTDH	23.6536	23.6454	22.7098	23.0075	22.9585	23.1933	23.5745	23.5736	23.7406			0.38857	0.408724	-0.2933	0.816033
D6RGW0;Q6P179	Endoplasmic reticulum aminopeptidase 2	D6RGW0;Q6P179	ERAP2	20.6168	20.1673	19.8123	21.7977	20.2625	20.3046	21.5367	20.79	19.1476			0.146425	0.713797	-0.292636	0.816409
Q01469;I6L8B7;A8MUU1	Fatty acid-binding protein, epidermal	Q01469;I6L8B7	FABP5	21.2606	21.3007	22.4236	21.1591	19.9477	21.4047	21.6564	23.2747	20.9311			0.13652	0.730265	-0.292401	0.816542
O15371;B0QYA5;B0QYA6;B0QYA4;B0QYA8	Eukaryotic translation initiation factor 3 subunit D	O15371;B0QYA5	EIF3D	20.9373	21.119	21.6067	21.5264	20.9366	23.0905	21.5715	21.7967	21.171			0.466295	0.341747	-0.292084	0.816721
P20700;E9PBF6;A0A0D9SFE5;A0A0D9SFY5;A0A0C4DGC5	Lamin-B1	P20700;E9PBF6;A0A0D9SFE5	LMNB1	24.9809	24.9473	25.6773	24.6999	24.861	24.7716	25.5087	25.5903	25.3807			0.521186	0.301171	-0.29141	0.817103
D6RAX7;D6RFN0;Q9BT78;D6RD63	COP9 signalosome complex subunit 4	D6RAX7;D6RFN0;Q9BT78	COPS4	20.6679	20.8366	21.9588	21.3024	21.2824	20.9713	21.3242	21.7825	21.2306			0.264613	0.543735	-0.291305	0.817163
A0A087WYT3;Q15185	Prostaglandin E synthase 3	A0A087WYT3;Q15185	PTGES3	20.9856	20.8633	21.3101	21.1275	22.3728	20.9673	21.1688	21.5845	21.2757			0.727442	0.187309	-0.289967	0.817921
P09972;K7EKH5;J3KSV6;J3QKP5;A8MVZ9;C9J8F3	Fructose-bisphosphate aldolase C;Fructose-bisphosphate aldolase	P09972;K7EKH5;J3KSV6;J3QKP5;A8MVZ9	ALDOC	24.4773	24.4375	24.8	24.7916	23.9875	24.2134	24.9937	24.8814	24.7087			0.957933	0.110171	-0.289675	0.818086
Q9HD20;H7C3H2	Manganese-transporting ATPase 13A1	Q9HD20	ATP13A1	21.9096	22.0983	22.105	22.492	22.7532	22.793	22.4727	22.2415	22.2608			1.37064	0.0425947	-0.287387	0.819385
E7EVX8;Q8WWY3;E7EU94;E7ESX0;E7EN72	U4/U6 small nuclear ribonucleoprotein Prp31	E7EVX8;Q8WWY3;E7EU94;E7ESX0;E7EN72	PRPF31	21.7334	21.5318	21.4575	21.5409	20.5328	20.7562	22.0212	21.5856	21.9745			0.824776	0.149701	-0.286219	0.820048
P61160;F5H6T1	Actin-related protein 2	P61160;F5H6T1	ACTR2	22.9316	22.4405	23.0716	22.7803	22.3862	22.6525	22.834	23.2644	23.2029			0.539687	0.288611	-0.28587	0.820247
A0A0C4DGS1;P39656;U3KQ84	Dolichyl-diphosphooligosaccharide--protein glycosyltransferase 48 kDa subunit	A0A0C4DGS1;P39656;U3KQ84	DDOST	24.4094	24.7035	24.5086	24.7932	24.7404	24.8392	24.9022	24.7965	24.7797			1.40787	0.0390956	-0.285613	0.820393
P00387;B1AHF3	NADH-cytochrome b5 reductase 3;NADH-cytochrome b5 reductase 3 membrane-bound form;NADH-cytochrome b5 reductase 3 soluble form	P00387;B1AHF3	CYB5R3	23.4779	23.4555	23.5538	23.8023	23.6699	23.8744	23.7903	23.6574	23.8907			1.73516	0.0184009	-0.283714	0.821473
A0A087WXM6;J3QQT2;J3KRX5;A0A0A6YYL6;P18621;J3QLC8;A0A0A0MRF8;J3KRB3;A0A087WWH0;J3QS96;J3KSJ0;A0A087WY81	60S ribosomal protein L17	A0A087WXM6;J3QQT2;J3KRX5;A0A0A6YYL6;P18621;J3QLC8;A0A0A0MRF8;J3KRB3;A0A087WWH0;J3QS96	RPL17;RPL17-C18orf32	24.9177	24.369	24.7705	24.0498	24.6305	24.5786	24.9281	25.1061	24.8728			0.726826	0.187575	-0.283274	0.821724
P68363;F8VQQ4;F8VVB9;F8VRZ4;F8VS66;F8VX09;F8VWV9;A6NHL2;C9K0S6;F8VRK0;F8VXZ7;F8W0F6	Tubulin alpha-1B chain	P68363	TUBA1B	28.324	28.8053	29.1679	28.7138	27.8229	28.403	28.9701	28.9761	29.1984			0.479863	0.331236	-0.282483	0.822175
P50897;E9PSE5;E9PP28;E9PK48;E9PIA8;E9PMG2	Palmitoyl-protein thioesterase 1	P50897;E9PSE5;E9PP28;E9PK48;E9PIA8;E9PMG2	PPT1	21.5465	19.6496	22.5526	20.4848	19.6974	22.2236	21.5401	21.7531	21.3005			0.119192	0.759991	-0.281654	0.822647
P46060;B0QYT6;B0QYT5;B0QYT4;H0Y4Q3	Ran GTPase-activating protein 1	P46060	RANGAP1	21.1523	21.4826	21.7563	20.9663	21.4516	20.8428	21.6015	21.6841	21.9461			0.619753	0.24002	-0.280148	0.823506
P67775;P62714;H0YBN9;H0YC23	Serine/threonine-protein phosphatase 2A catalytic subunit alpha isoform;Serine/threonine-protein phosphatase 2A catalytic subunit beta isoform	P67775;P62714;H0YBN9;H0YC23	PPP2CA;PPP2CB	20.1051	19.4211	20.226	19.7668	19.4219	22.2513	20.3499	20.0058	20.2312			0.442224	0.361224	-0.278232	0.824601
Q15029;K7EP67;K7EJ74	116 kDa U5 small nuclear ribonucleoprotein component	Q15029	EFTUD2	24.2997	24.2081	24.6419	24.4646	24.2461	24.4008	24.5783	24.6256	24.779			0.891379	0.128416	-0.277727	0.82489
E9PJD9;E9PLL6;P46776;E9PLX7	60S ribosomal protein L27a	E9PJD9;E9PLL6;P46776;E9PLX7	RPL27A	24.9044	24.5023	24.2605	25.1276	24.4927	24.4813	24.7565	24.8234	24.9202			0.647899	0.224958	-0.277681	0.824916
P31689	DnaJ homolog subfamily A member 1	P31689	DNAJA1	23.8759	24.1609	23.7877	24.0906	23.22	23.917	24.2698	24.0806	24.306			0.980467	0.1046	-0.277299	0.825134
Q99986;H0YJF7;H0YJ50	Serine/threonine-protein kinase VRK1	Q99986	VRK1	20.9611	21.7821	20.9786	21.4378	21.0611	22.0828	21.2789	21.7925	21.4822			0.37619	0.420543	-0.277298	0.825135
P63244;J3KPE3;D6RHH4;D6RAC2;H0Y8W2;D6RFX4;H0YAF8;D6R9Z1;D6R9L0;D6REE5;H0YAM7;D6RAU2;E9PD14;D6RBD0;D6RFZ9;H0Y8R5;D6RGK8;D6RF23;D6R909;H0Y9P0;D6RHJ5;D6RDI0	Guanine nucleotide-binding protein subunit beta-2-like 1;Guanine nucleotide-binding protein subunit beta-2-like 1, N-terminally processed	P63244;J3KPE3;D6RHH4;D6RAC2;H0Y8W2;D6RFX4;H0YAF8;D6R9Z1;D6R9L0;D6REE5;H0YAM7	GNB2L1	24.8811	25.1273	25.1225	25.2161	25.3246	25.1898	25.4006	25.2843	25.2767			1.42194	0.0378496	-0.276925	0.825348
P42167;G5E972;H0YJH7	Lamina-associated polypeptide 2, isoforms beta/gamma;Thymopoietin;Thymopentin	P42167;G5E972	TMPO	24.9831	24.5465	24.9844	24.8814	24.6434	24.8556	25.208	25.0219	25.1144			0.825762	0.149361	-0.276773	0.825435
P39019;M0R2L9;M0QXK4;M0QYF7;M0R140;A0A075B6E2	40S ribosomal protein S19	P39019;M0R2L9;M0QXK4;M0QYF7;M0R140	RPS19	22.9693	22.9537	23.2547	23.3406	22.1682	23.0061	23.3865	23.3628	23.2521			1.21444	0.0610319	-0.274573	0.826695
P36578;H3BM89;H3BTP7;H3BU31	60S ribosomal protein L4	P36578;H3BM89	RPL4	25.4164	25.2571	25.5427	25.3498	25.0764	25.0578	25.7278	25.6006	25.7085			1.3925	0.040504	-0.273577	0.827266
Q9Y230;M0R0Y3;X6R2L4;M0R0Z0;M0QXI6;M0QXZ7	RuvB-like 2	Q9Y230;M0R0Y3	RUVBL2	24.3182	24.5104	24.4197	24.5503	24.1716	24.517	24.7379	24.5975	24.7232			1.71651	0.0192082	-0.270068	0.82928
H0YLA2;P37108	Signal recognition particle 14 kDa protein	H0YLA2;P37108	SRP14	22.2245	22.3054	22.4673	22.5162	22.2362	21.8576	22.6451	22.5656	22.5961			1.64133	0.0228388	-0.269854	0.829404
P31350;C9JXC1	Ribonucleoside-diphosphate reductase subunit M2	P31350;C9JXC1	RRM2	21.0018	20.0498	21.0683	21.0923	20.7009	20.6309	20.4025	21.1791	21.3477			0.242392	0.572279	-0.269808	0.82943
Q86UX7;F5H1C6;H0YFT5;F5H3I6	Fermitin family homolog 3	Q86UX7	FERMT3	23.87	24.1589	23.8227	24.084	24.1563	24.1699	24.3352	24.0877	24.2375			0.992929	0.101642	-0.26964	0.829527
P61088;F8VZ29;F8VSD4;F8VV71;Q5JXB2;F8VQQ8	Ubiquitin-conjugating enzyme E2 N;Putative ubiquitin-conjugating enzyme E2 N-like	P61088;F8VZ29;F8VSD4;F8VV71;Q5JXB2	UBE2N;UBE2NL	21.8412	21.5577	22.259	21.8197	21.1851	22.0768	21.8078	22.1222	22.5358			0.387004	0.410201	-0.269306	0.829718
P07900;G3V2J8;Q14568;Q58FG0;Q58FG1	Heat shock protein HSP 90-alpha	P07900	HSP90AA1	26.6306	26.718	27.108	26.8767	26.3524	26.7066	26.9801	27.1502	27.1337			0.794707	0.160433	-0.269136	0.829816
O75396;A0A087X1A9	Vesicle-trafficking protein SEC22b	O75396	SEC22B	23.0567	23.2157	22.9402	23.2901	22.8056	23.2047	23.3673	23.3639	23.287			1.48054	0.0330719	-0.268517	0.830173
P61254;J3KTJ8;J3QRI7;J3QQQ9;J3QQV1;E5RIT6;J3QRC4;Q9UNX3;J3KSS0;E5RHH1;J3KS10	60S ribosomal protein L26;60S ribosomal protein L26-like 1	P61254;J3KTJ8;J3QRI7;J3QQQ9;J3QQV1;E5RIT6;J3QRC4;Q9UNX3	RPL26;RPL26L1	24.1555	23.7986	24.5816	24.0031	23.9189	24.4733	24.4078	24.4147	24.5152			0.511635	0.307868	-0.267338	0.830851
Q12874	Splicing factor 3A subunit 3	Q12874	SF3A3	21.967	21.9214	23.2369	22.3892	22.1881	22.1484	22.7711	22.6987	22.4474			0.234579	0.582667	-0.263943	0.832808
P62136;H0Y3Y6;E7ETD8;E9PMD7;P62140;F5H1L6;F5H037	Serine/threonine-protein phosphatase PP1-alpha catalytic subunit;Serine/threonine-protein phosphatase;Serine/threonine-protein phosphatase PP1-beta catalytic subunit	P62136;H0Y3Y6;E7ETD8;E9PMD7;P62140	PPP1CA;PPP1CB	21.6763	22.7299	22.8144	22.3778	22.2075	22.6666	22.7537	22.7458	22.5128			0.284081	0.519898	-0.26389	0.832839
Q08211	ATP-dependent RNA helicase A	Q08211	DHX9	25.947	25.9777	25.605	25.858	25.961	26.0331	26.0307	26.0894	26.1965			0.952001	0.111686	-0.262275	0.833772
P62913;Q5VVC8;Q5VVC9	60S ribosomal protein L11	P62913;Q5VVC8	RPL11	25.5689	25.831	26.1885	25.7063	25.5499	25.646	26.2105	26.0051	26.1577			0.619326	0.240256	-0.261612	0.834155
Q02790;H0YFG2;F5H1U3;F5H120	Peptidyl-prolyl cis-trans isomerase FKBP4;Peptidyl-prolyl cis-trans isomerase FKBP4, N-terminally processed	Q02790	FKBP4	22.7321	22.5912	23.6558	22.5551	22.5138	23.1739	23.1595	23.3205	23.2833			0.317213	0.481712	-0.261407	0.834274
B9A041;P40925;B8ZZ51;C9JF79;C9JRL4	Malate dehydrogenase, cytoplasmic;Malate dehydrogenase	B9A041;P40925;B8ZZ51;C9JF79	MDH1	23.2309	23.3149	23.8984	22.7892	23.2185	23.335	23.5606	23.7071	23.9585			0.470664	0.338327	-0.26067	0.8347
Q96KP4;J3QKT2;J3KRD5;J3QQN6;J3QR27;J3QLU1;A0A087WVS2;J3QKQ0;J3QRD0;J3QL02;J3KSV5;A0A087WYZ1;J3QRA8;J3QRH4	Cytosolic non-specific dipeptidase	Q96KP4	CNDP2	22.8682	23.0864	22.9541	22.3567	22.4275	22.841	23.0181	23.4898	23.1804			0.787718	0.163035	-0.259831	0.835186
Q15046;H3BVA8;H3BRC9;J3KRL2;H3BPV7	Lysine--tRNA ligase	Q15046	KARS	23.7793	24.1176	23.924	24.0185	23.5465	23.8954	24.1154	24.2945	24.1904			1.10142	0.0791738	-0.259819	0.835193
D6RAN4;P32969;E7ESE0;H0Y9V9;H0Y9R4	60S ribosomal protein L9	D6RAN4;P32969;E7ESE0;H0Y9V9	RPL9	25.156	25.2833	25.0347	25.1494	25.1886	25.2788	25.6174	25.1869	25.4483			0.834185	0.146492	-0.259547	0.83535
P11021	78 kDa glucose-regulated protein	P11021	HSPA5	26.9122	27.142	27.6466	27.4542	26.918	27.2084	27.4398	27.4877	27.5502			0.518515	0.303029	-0.258942	0.8357
P00813;F5GWI4;F5GXW0;F5GYD4	Adenosine deaminase	P00813;F5GWI4	ADA	23.5442	23.7078	25.2277	24.0943	23.3452	23.8166	24.3031	24.5841	24.3657			0.180671	0.659673	-0.257704	0.836418
Q8NBM4;X6R5E5	Ubiquitin-associated domain-containing protein 2	Q8NBM4;X6R5E5	UBAC2	19.2248	22.8656	20.8534	21.0255	22.0079	21.1453	21.4291	21.1422	21.1398			0.0857908	0.820747	-0.255777	0.837536
P00491;G3V5M2;G3V393;G3V2H3	Purine nucleoside phosphorylase	P00491;G3V5M2	PNP	22.66	22.2163	22.1534	22.5414	22.4192	22.8589	22.4057	22.6623	22.7273			0.611607	0.244565	-0.255185	0.837879
H0Y4R1;P12268;E7ETK5	Inosine-5-monophosphate dehydrogenase 2	H0Y4R1;P12268;E7ETK5	IMPDH2	24.382	24.6643	24.8944	24.6309	23.7718	24.4198	24.9562	24.8377	24.9111			0.771221	0.169347	-0.254772	0.83812
P30101	Protein disulfide-isomerase A3	P30101	PDIA3	25.2988	25.0899	25.8816	25.3906	25.0933	25.3844	25.6358	25.6817	25.7151			0.461053	0.345897	-0.254063	0.838531
O95235;D6R9E4;D6RBN1	Kinesin-like protein KIF20A	O95235	KIF20A	20.2317	19.6196	21.7888	21.4268	22.3934	20.9148	20.6456	20.2412	21.5069			0.12312	0.753147	-0.25124	0.840174
P05198;H0YJS4;G3V4T5	Eukaryotic translation initiation factor 2 subunit 1	P05198;H0YJS4;G3V4T5	EIF2S1	23.0868	22.3333	23.2102	23.2873	22.9734	23.0755	23.144	23.159	23.0799			0.383592	0.413436	-0.250877	0.840386
P78362;H7C5L6	SRSF protein kinase 2;SRSF protein kinase 2 N-terminal;SRSF protein kinase 2 C-terminal	P78362	SRPK2	20.5109	20.6343	19.8524	20.9345	21.8197	19.7595	20.0362	20.7725	20.9398			0.272073	0.534475	-0.250284	0.840731
A0A087WUT6;O60841	Eukaryotic translation initiation factor 5B	A0A087WUT6;O60841	EIF5B	22.5302	22.5503	21.9862	23.3052	23.5051	22.7465	22.6854	22.5204	22.6045			0.578788	0.263762	-0.247865	0.842142
A0A0B4J1Z1;C9JAB2;Q16629	Serine/arginine-rich splicing factor 7	A0A0B4J1Z1;C9JAB2;Q16629	SRSF7	24.3979	24.268	23.6362	24.822	25.3299	25.1719	24.2779	24.5892	24.178			0.393321	0.404277	-0.247663	0.842259
Q16763;K7EPJ1;K7EM75	Ubiquitin-conjugating enzyme E2 S	Q16763;K7EPJ1	UBE2S	22.8814	22.9147	22.1427	22.694	22.2959	22.5329	22.8737	22.9378	22.8684			0.415536	0.384118	-0.247014	0.842639
P52907;A0A0D9SET8	F-actin-capping protein subunit alpha-1	P52907	CAPZA1	23.214	23.1867	24.354	23.6991	23.3582	23.7982	23.796	23.8641	23.835			0.254503	0.55654	-0.246777	0.842777
H3BRU6;F8VZX2;Q15366;F8W0G4;F8VXH9;F8W1G6;J3QT27;E9PFP8;P57721;F8VRH0;H3BSS4;H3BND9	Poly(rC)-binding protein 2;Poly(rC)-binding protein 3	H3BRU6;F8VZX2;Q15366;F8W0G4;F8VXH9;F8W1G6;J3QT27;E9PFP8;P57721	PCBP2;PCBP3	24.8287	24.801	24.9756	25.1184	24.8547	25.0261	25.0906	25.1476	25.0995			1.89259	0.012806	-0.244108	0.844338
P42766;F2Z388	60S ribosomal protein L35	P42766;F2Z388	RPL35	20.2852	20.3807	21.7839	19.2173	21.322	20.4798	20.876	20.3898	21.9103			0.135275	0.732361	-0.242098	0.845515
J9JID7;Q03252	Lamin-B2	J9JID7;Q03252	LMNB2	20.6406	20.8402	21.0773	20.4542	21.3399	20.6254	20.6059	21.3417	21.336			0.367772	0.428773	-0.24187	0.845648
P60468;S4R3B5	Protein transport protein Sec61 subunit beta	P60468;S4R3B5	SEC61B	20.9645	20.8358	20.7446	20.9159	20.7489	21.6358	22.1094	20.5018	20.656			0.177134	0.665067	-0.240786	0.846284
P00338;F5GYU2;F5GXY2;F5GXH2;F5GZQ4;F5H5J4;F5H6W8;F5H8H6;F5GXC7;F5GWW2;F5GXU1	L-lactate dehydrogenase A chain	P00338;F5GYU2;F5GXY2	LDHA	25.8671	25.8271	26.0694	25.6363	25.7851	25.9114	26.2361	26.0329	26.2154			1.14167	0.0721653	-0.240238	0.846606
O95433;G3V438;H0YJU2;G3V3W9;H0YJG7;H0YJ63	Activator of 90 kDa heat shock protein ATPase homolog 1	O95433;G3V438;H0YJU2	AHSA1	21.7447	22.1546	22.6227	21.2962	22.3771	22.7165	22.2302	22.4741	22.5333			0.369609	0.426964	-0.238538	0.847604
Q09161;F2Z2T1	Nuclear cap-binding protein subunit 1	Q09161	NCBP1	21.3989	21.3904	21.3748	19.2997	21.2808	21.5886	21.4999	21.6381	21.7412			1.5613	0.0274601	-0.238356	0.847711
O75083;D6RD66	WD repeat-containing protein 1	O75083;D6RD66	WDR1	25.537	25.6414	26.0105	25.7904	25.4861	25.5137	25.9368	25.9516	26.0151			0.751569	0.177187	-0.238211	0.847796
P09661;H0YLR3;H0YMA0;H0YKK0	U2 small nuclear ribonucleoprotein A	P09661;H0YLR3;H0YMA0	SNRPA1	21.9922	22.0224	22.204	22.2893	22.0285	22.3793	22.3563	22.3205	22.2559			1.51908	0.0302633	-0.238014	0.847912
B5MDE0;Q96AA3	Protein RFT1 homolog	B5MDE0;Q96AA3	RFT1	20.9296	20.8651	20.5283	21.3856	22.1159	21.2646	20.9409	20.8909	21.2028			0.684519	0.206767	-0.237184	0.8484
Q96HE7;G3V3E6;G3V5B3;G3V503	ERO1-like protein alpha	Q96HE7;G3V3E6	ERO1L	22.3227	22.1618	22.7705	22.6495	21.9644	22.4077	22.6205	22.3089	23.0339			0.3531	0.443507	-0.236093	0.849042
Q15084	Protein disulfide-isomerase A6	Q15084	PDIA6	23.34	23.9122	24.4642	24.0074	22.8147	23.6837	24.1322	24.1765	24.113			0.292762	0.50961	-0.235088	0.849633
Q3BDU5;P02545;Q5TCI8;H0YAB0	Prelamin-A/C;Lamin-A/C	Q3BDU5;P02545;Q5TCI8	LMNA	22.4607	20.9444	18.5641	21.7763	22.0905	19.6451	21.7098	21.913	19.0508			0.0554462	0.880144	-0.234828	0.849786
Q7KZF4;H7C597	Staphylococcal nuclease domain-containing protein 1	Q7KZF4	SND1	25.3751	25.2857	25.1513	25.3599	25.4394	25.6212	25.4731	25.4386	25.6008			1.33766	0.0459559	-0.233441	0.850604
Q5T760;Q05519;B4DWT1;Q5T757	Serine/arginine-rich splicing factor 11	Q5T760;Q05519	SRSF11	23.1096	22.7202	22.4028	22.7086	23.7005	23.43	22.7663	23.1128	23.0516			0.431784	0.370012	-0.232709	0.851036
Q9Y266;A0A0A0MSU9;A0A0A0MSS4	Nuclear migration protein nudC	Q9Y266;A0A0A0MSU9	NUDC	19.8367	21.2751	20.9652	21.0517	20.6076	21.2051	20.97	21.2353	20.5666			0.184742	0.653518	-0.231638	0.851667
P31146;H3BRY3;H3BTU6;H3BRJ0;H3BNA2;H3BU76;H3BSL1	Coronin-1A;Coronin	P31146;H3BRY3	CORO1A	26.2767	26.1355	26.7474	26.5236	26.3211	26.371	26.5156	26.6944	26.6442			0.529575	0.29541	-0.231512	0.851742
E9PSH8;P07766	T-cell surface glycoprotein CD3 epsilon chain	E9PSH8;P07766	CD3E	23.1717	22.9129	23.1084	22.907	23.0207	23.2587	23.1619	23.3934	23.3324			1.04321	0.090529	-0.231503	0.851747
K7EQ48;P06744;A0A0A0MTS2;A0A0J9YXP8;A0A0J9YX90;A0A0J9YYH3;K7EPY4;K7EP41;K7ELR7;K7ENA0;K7ERC6;CON__Q3ZBD7;K7ERK8;K7EIL4;K7ESF4;Q8N196	Glucose-6-phosphate isomerase	K7EQ48;P06744;A0A0A0MTS2;A0A0J9YXP8;A0A0J9YX90;A0A0J9YYH3;K7EPY4	GPI	23.7315	23.4822	23.8575	23.7946	23.4148	23.5134	23.8864	23.7146	24.1639			0.605554	0.247997	-0.231228	0.85191
P60866;E5RJX2;E5RIP1;G3XAN0	40S ribosomal protein S20	P60866;E5RJX2;E5RIP1	RPS20	23.5478	24.2604	25.0101	24.3145	23.3966	23.9931	24.5999	24.3272	24.5832			0.206823	0.621122	-0.23067	0.852239
O95202	LETM1 and EF-hand domain-containing protein 1, mitochondrial	O95202	LETM1	23.486	22.9356	23.532	23.3127	22.994	23.4087	23.5272	23.4686	23.6459			0.505401	0.312319	-0.229379	0.853002
Q8WXX5	DnaJ homolog subfamily C member 9	Q8WXX5	DNAJC9	21.3373	21.4693	21.4851	21.4166	22.6696	21.7237	21.4923	21.4817	21.9966			0.57106	0.268497	-0.226285	0.854833
Q7Z7K6	Centromere protein V	Q7Z7K6	CENPV	22.2247	22.5603	22.1948	22.3243	22.3535	22.3856	22.3154	22.5669	22.7745			0.566178	0.271533	-0.225616	0.85523
Q9Y3U8;J3QSB5;J3KTD3	60S ribosomal protein L36	Q9Y3U8;J3QSB5	RPL36	23.5269	23.0599	23.0755	23.2673	23.2292	23.497	23.5148	23.2674	23.55			0.559337	0.275844	-0.22331	0.856598
P51659;E7EWE5;E7ER27;G5E9S2;E7ET17;E7EPL9	Peroxisomal multifunctional enzyme type 2;(3R)-hydroxyacyl-CoA dehydrogenase;Enoyl-CoA hydratase 2	P51659;E7EWE5;E7ER27;G5E9S2;E7ET17	HSD17B4	24.088	24.3753	24.2941	24.211	23.962	24.2582	24.56	24.4157	24.4497			1.09092	0.081111	-0.222633	0.857
P35754	Glutaredoxin-1	P35754	GLRX	20.5121	21.0513	20.8375	20.9681	20.6529	19.0853	21.0742	21.0688	20.9226			0.603596	0.249118	-0.221568	0.857633
P37268;E9PNM1;E9PJG4;E9PS69	Squalene synthase	P37268;E9PNM1	FDFT1	22.9929	22.3977	23.3092	22.7538	22.9247	22.4238	23.1503	23.0235	23.1838			0.332783	0.464747	-0.219286	0.85899
P08621;M0QYR1;M0QX04	U1 small nuclear ribonucleoprotein 70 kDa	P08621;M0QYR1	SNRNP70	22.1792	21.9607	22.3061	22.1911	22.5134	22.3553	22.4088	22.2817	22.4121			0.9332	0.116627	-0.218849	0.859251
P63104;E7EX29;B0AZS6;B7Z2E6;H0YB80;E7ESK7;E5RIR4;E9PD24;E7EVZ2;E5RGE1	14-3-3 protein zeta/delta	P63104;E7EX29;B0AZS6;B7Z2E6;H0YB80;E7ESK7	YWHAZ	24.6635	24.4976	25.6158	24.8616	24.9545	24.5706	25.1229	25.2201	25.0897			0.246633	0.566718	-0.218604	0.859397
E7EV99;E7ENY0;P35611;A0A0A0MSR2;H0Y9H2;D6RF25	Alpha-adducin	E7EV99;E7ENY0;P35611;A0A0A0MSR2;H0Y9H2	ADD1	21.0057	20.6756	21.2278	21.0236	20.5997	20.839	21.0611	21.2414	21.2603			0.560434	0.275148	-0.217904	0.859813
Q8WUM4;C9IZF9;F8WEQ7;F8WBR8;F8WDK9	Programmed cell death 6-interacting protein	Q8WUM4	PDCD6IP	21.6201	21.6289	22.2437	22.0758	21.5581	21.842	21.919	21.9692	22.2547			0.395803	0.401973	-0.216707	0.860528
Q2TAY7	WD40 repeat-containing protein SMU1;WD40 repeat-containing protein SMU1, N-terminally processed	Q2TAY7	SMU1	22.3015	22.609	22.0525	22.5714	22.8325	23.0123	22.6085	22.3989	22.598			0.541054	0.287704	-0.214161	0.862047
P14635;E9PC90;H0YA62;D6RHI0	G2/mitotic-specific cyclin-B1	P14635;E9PC90	CCNB1	21.0708	21.683	21.2477	21.2824	20.7987	21.7786	21.145	21.7859	21.7115			0.32214	0.476278	-0.213616	0.862373
S4R3H4;E7EQT4;Q9UKV3;G3V3B0;G3V3T3;A0A087WYN3	Apoptotic chromatin condensation inducer in the nucleus	S4R3H4;E7EQT4;Q9UKV3	ACIN1	23.2737	23.015	23.0731	23.8884	24.274	24.009	23.2032	23.2472	23.5505			0.725674	0.188073	-0.213045	0.862714
A0A0J9YWL0;Q9Y4K1;Q96QW7	Absent in melanoma 1 protein	A0A0J9YWL0;Q9Y4K1;Q96QW7	AIM1	20.1433	21.3575	20.0373	21.7902	20.9716	20.9641	20.1609	21.7226	20.2934			0.118349	0.761467	-0.212948	0.862773
Q573B4;P06239;E9PAP0;E9PJ92;F8W6B9;E9PKQ8;J3QRU1;P12931;P06241;P07947	Non-specific protein-tyrosine kinase;Tyrosine-protein kinase Lck	Q573B4;P06239;E9PAP0;E9PJ92	LCK	24.3879	24.4368	24.8657	24.3842	24.3932	24.4002	24.718	24.7118	24.8958			0.577515	0.264536	-0.211743	0.863493
P07954	Fumarate hydratase, mitochondrial	P07954	FH	23.8714	23.9914	23.8798	23.8567	23.3603	23.9153	24.2202	23.9831	24.171			1.20748	0.0620183	-0.210569	0.864196
Q6P2Q9;I3L0J9;I3L3Z8	Pre-mRNA-processing-splicing factor 8	Q6P2Q9	PRPF8	23.5343	23.127	23.037	22.9555	23.4045	23.3255	23.4466	23.4054	23.4752			0.609074	0.245995	-0.209614	0.864769
P11908;B1ALA9;P60891;B7ZB02;A6NMS2;B1ALA7;H7C540;D3YTJ7;A0A0B4J207;P21108	Ribose-phosphate pyrophosphokinase 2;Ribose-phosphate pyrophosphokinase 1	P11908;B1ALA9;P60891;B7ZB02	PRPS2;PRPS1	22.1889	21.796	22.1611	22.029	21.2849	21.9147	22.465	22.1281	22.1804			0.565669	0.271851	-0.209157	0.865042
[truncated: 524 more rows]

## Sheet: PSvsCS_PerseusOutput
Protein IDs	Protein names	Majority protein IDs	Gene names	LFQ intensity US Bio1	LFQ intensity US Bio2	LFQ intensity US Bio3	LFQ intensity PS Bio1	LFQ intensity PS Bio2	LFQ intensity PS Bio3	LFQ intensity CS Bio1	LFQ intensity CS Bio2	LFQ intensity CS Bio3	Student's T-test Significant PS vs CS	Student's T-test significant	(-)Log Student's T-test p-value	PS vs CS Student's T-test p-value	Student's T-test Difference PS vs CS	Fold Difference (PS vs CS)
[truncated: 1,204 more rows]

[truncated: 1 more sheets: Summary of Enriched Proteins]
