# Supplementary material for: Identification of host proteins differentially associated with HIV-1 RNA splice variants
Source: eLife. 2021 Feb 25;10:e62470. doi: 10.7554/eLife.62470 (PMC7906601; doi:10.7554/eLife.62470)
Supplement: Figure 2—source data 2. [file elife-62470-fig2-data2.xlsx]

## Sheet: US_BP
Figure 2-source data 2: Gene Ontology Term Enrichment Analysis. Related to Figure 2
HIV-1 US RNA Interactome; Biological Processes
Analysis Type:	PANTHER Overrepresentation Test (Released 20171205)
Annotation Version and Release Date:	GO Ontology database Released 2018-08-09
Analyzed List:	upload_1 (Homo sapiens)
Reference List:	Homo sapiens (all genes in database)
Test Type:	FISHER
GO biological process complete	Homo sapiens - REFLIST (21042)	upload_1 (100)	upload_1 (expected)	upload_1 (over/under)	upload_1 (fold Enrichment)	upload_1 (raw P-value)	upload_1 (FDR)
negative regulation of mitochondrial RNA catabolic process (GO:0000961)	2	2	0.01	+	> 100	0.000132	0.0192
regulation of mitochondrial RNA catabolic process (GO:0000960)	4	2	0.02	+	> 100	0.000328	0.043
negative regulation of RNA catabolic process (GO:1902369)	50	6	0.24	+	25.25	2.58e-07	9.9e-05
CRD-mediated mRNA stabilization (GO:0070934)	5	3	0.02	+	> 100	5.65e-06	0.00124
mRNA stabilization (GO:0048255)	36	4	0.17	+	23.38	3.78e-05	0.00661
regulation of mRNA stability (GO:0043488)	118	9	0.56	+	16.05	9.18e-09	5.16e-06
regulation of mRNA catabolic process (GO:0061013)	140	9	0.67	+	13.53	3.71e-08	1.82e-05
regulation of mRNA metabolic process (GO:1903311)	262	16	1.25	+	12.85	2.6e-13	5.84e-10
regulation of gene expression (GO:0010468)	4634	38	22.02	+	1.73	0.000376	0.0485
regulation of RNA stability (GO:0043487)	127	9	0.6	+	14.91	1.67e-08	8.5e-06
posttranscriptional regulation of gene expression (GO:0010608)	461	15	2.19	+	6.85	6.83e-09	3.98e-06
RNA stabilization (GO:0043489)	41	4	0.19	+	20.53	6.05e-05	0.00992
negative regulation of mRNA catabolic process (GO:1902373)	43	4	0.2	+	19.57	7.19e-05	0.0114
negative regulation of mRNA metabolic process (GO:1903312)	72	7	0.34	+	20.46	9.39e-08	4.35e-05
negative regulation of mRNA splicing, via spliceosome (GO:0048025)	21	3	0.1	+	30.06	0.000193	0.0274
regulation of mRNA splicing, via spliceosome (GO:0048024)	96	5	0.46	+	10.96	0.000118	0.0176
regulation of RNA splicing (GO:0043484)	132	7	0.63	+	11.16	4.39e-06	0.00103
regulation of mRNA processing (GO:0050684)	133	7	0.63	+	11.07	4.6e-06	0.00103
negative regulation of RNA splicing (GO:0033119)	26	4	0.12	+	32.37	1.17e-05	0.0025
negative regulation of gene expression (GO:0010629)	1681	23	7.99	+	2.88	3.48e-06	0.000883
nucleosome positioning (GO:0016584)	16	3	0.08	+	39.45	9.42e-05	0.0145
negative regulation of chromatin silencing (GO:0031936)	20	3	0.1	+	31.56	0.00017	0.0245
mRNA destabilization (GO:0061157)	24	3	0.11	+	26.3	0.000277	0.0369
negative regulation of translation (GO:0017148)	126	9	0.6	+	15.03	1.57e-08	8.23e-06
negative regulation of cellular amide metabolic process (GO:0034249)	142	9	0.67	+	13.34	4.16e-08	1.99e-05
regulation of cellular amide metabolic process (GO:0034248)	386	12	1.83	+	6.54	3.97e-07	0.000142
regulation of translation (GO:0006417)	337	12	1.6	+	7.49	9.69e-08	4.36e-05
RNA destabilization (GO:0050779)	26	3	0.12	+	24.28	0.000343	0.0446
cellular amino acid catabolic process (GO:0009063)	119	5	0.57	+	8.84	0.000309	0.0408
mRNA transport (GO:0051028)	157	6	0.75	+	8.04	0.000126	0.0185
mRNA splicing, via spliceosome (GO:0000398)	289	9	1.37	+	6.55	1.21e-05	0.0025
mRNA processing (GO:0006397)	459	12	2.18	+	5.5	2.32e-06	0.000628
RNA processing (GO:0006396)	837	16	3.98	+	4.02	2.41e-06	0.000644
RNA metabolic process (GO:0016070)	3455	32	16.42	+	1.95	0.000118	0.0177
nucleic acid metabolic process (GO:0090304)	3978	37	18.91	+	1.96	2.81e-05	0.00521
mRNA metabolic process (GO:0016071)	671	18	3.19	+	5.64	3.48e-09	2.28e-06
RNA splicing, via transesterification reactions with bulged adenosine as nucleophile (GO:0000377)	289	9	1.37	+	6.55	1.21e-05	0.00246
RNA splicing, via transesterification reactions (GO:0000375)	292	9	1.39	+	6.49	1.31e-05	0.00263
RNA splicing (GO:0008380)	387	11	1.84	+	5.98	2.9e-06	0.000747
mitochondrial translational termination (GO:0070126)	89	5	0.42	+	11.82	8.42e-05	0.0131
translational termination (GO:0006415)	95	5	0.45	+	11.07	0.000113	0.0171
mitochondrial translational elongation (GO:0070125)	88	6	0.42	+	14.35	5.6e-06	0.00124
mitochondrial translation (GO:0032543)	112	7	0.53	+	13.15	1.56e-06	0.000445
mitochondrial gene expression (GO:0140053)	137	8	0.65	+	12.29	4.41e-07	0.000151
acyl-CoA biosynthetic process (GO:0071616)	42	4	0.2	+	20.04	6.6e-05	0.0107
coenzyme biosynthetic process (GO:0009108)	173	6	0.82	+	7.3	0.000209	0.0294
thioester biosynthetic process (GO:0035384)	42	4	0.2	+	20.04	6.6e-05	0.0106
ribonucleoside bisphosphate biosynthetic process (GO:0034030)	58	4	0.28	+	14.51	0.000213	0.0294
amide biosynthetic process (GO:0043604)	525	19	2.5	+	7.62	8.83e-12	1.07e-08
purine nucleoside bisphosphate biosynthetic process (GO:0034033)	58	4	0.28	+	14.51	0.000213	0.0297
tricarboxylic acid cycle (GO:0006099)	35	7	0.17	+	42.08	1.01e-09	8.35e-07
citrate metabolic process (GO:0006101)	39	7	0.19	+	37.77	1.97e-09	1.48e-06
aerobic respiration (GO:0009060)	73	8	0.35	+	23.06	4.56e-09	2.76e-06
succinate metabolic process (GO:0006105)	12	3	0.06	+	52.6	4.48e-05	0.00759
dicarboxylic acid metabolic process (GO:0043648)	108	11	0.51	+	21.43	1.04e-11	1.17e-08
proline metabolic process (GO:0006560)	10	3	0.05	+	63.13	2.84e-05	0.00513
cellular amino acid metabolic process (GO:0006520)	318	9	1.51	+	5.96	2.51e-05	0.00476
fatty acid beta-oxidation using acyl-CoA dehydrogenase (GO:0033539)	10	3	0.05	+	63.13	2.84e-05	0.00519
fatty acid beta-oxidation (GO:0006635)	58	4	0.28	+	14.51	0.000213	0.0291
biotin metabolic process (GO:0006768)	7	3	0.03	+	90.18	1.2e-05	0.00252
monocarboxylic acid metabolic process (GO:0032787)	505	14	2.4	+	5.83	1.55e-07	6.42e-05
water-soluble vitamin metabolic process (GO:0006767)	84	6	0.4	+	15.03	4.35e-06	0.00104
drug metabolic process (GO:0017144)	649	18	3.08	+	5.84	2.09e-09	1.5e-06
succinyl-CoA metabolic process (GO:0006104)	6	3	0.03	+	> 100	8.45e-06	0.00182
acyl-CoA metabolic process (GO:0006637)	94	7	0.45	+	15.67	5.12e-07	0.000168
purine nucleoside bisphosphate metabolic process (GO:0034032)	129	7	0.61	+	11.42	3.8e-06	0.000949
coenzyme metabolic process (GO:0006732)	309	14	1.47	+	9.53	3.86e-10	3.8e-07
purine ribonucleotide metabolic process (GO:0009150)	423	10	2.01	+	4.97	3.92e-05	0.00678
tricarboxylic acid metabolic process (GO:0072350)	43	7	0.2	+	34.25	3.62e-09	2.28e-06
thioester metabolic process (GO:0035383)	94	7	0.45	+	15.67	5.12e-07	0.000164
nucleoside bisphosphate biosynthetic process (GO:0033866)	58	4	0.28	+	14.51	0.000213	0.0289
antibiotic metabolic process (GO:0016999)	137	8	0.65	+	12.29	4.41e-07	0.000148
ribonucleoside bisphosphate metabolic process (GO:0033875)	129	7	0.61	+	11.42	3.8e-06	0.000934
nucleoside bisphosphate metabolic process (GO:0033865)	129	7	0.61	+	11.42	3.8e-06	0.000919
cellular respiration (GO:0045333)	156	8	0.74	+	10.79	1.12e-06	0.000327
cofactor biosynthetic process (GO:0051188)	227	8	1.08	+	7.42	1.6e-05	0.00318
vitamin metabolic process (GO:0006766)	120	6	0.57	+	10.52	3e-05	0.00536
translational elongation (GO:0006414)	125	6	0.59	+	10.1	3.73e-05	0.0066
energy derivation by oxidation of organic compounds (GO:0015980)	226	9	1.07	+	8.38	1.76e-06	0.000485
organic acid catabolic process (GO:0016054)	255	9	1.21	+	7.43	4.55e-06	0.00105
carboxylic acid catabolic process (GO:0046395)	255	9	1.21	+	7.43	4.55e-06	0.00104
cellular amide metabolic process (GO:0043603)	773	27	3.67	+	7.35	3.65e-16	5.75e-12
sulfur compound metabolic process (GO:0006790)	353	12	1.68	+	7.15	1.57e-07	6.35e-05
cofactor metabolic process (GO:0051186)	494	16	2.35	+	6.82	2.17e-09	1.48e-06
peptide biosynthetic process (GO:0043043)	413	13	1.96	+	6.62	1.09e-07	4.77e-05
translation (GO:0006412)	387	12	1.84	+	6.52	4.08e-07	0.000143
generation of precursor metabolites and energy (GO:0006091)	401	12	1.91	+	6.3	5.87e-07	0.000181
carboxylic acid metabolic process (GO:0019752)	897	26	4.26	+	6.1	9.94e-14	2.61e-10
peptide metabolic process (GO:0006518)	529	14	2.51	+	5.57	2.68e-07	9.82e-05
oxoacid metabolic process (GO:0043436)	987	26	4.69	+	5.54	8.4e-13	1.65e-09
organic acid metabolic process (GO:0006082)	1005	26	4.78	+	5.44	1.25e-12	1.97e-09
ribonucleotide metabolic process (GO:0009259)	438	10	2.08	+	4.8	5.22e-05	0.00874
purine-containing compound metabolic process (GO:0072521)	482	11	2.29	+	4.8	2.17e-05	0.00421
purine nucleotide metabolic process (GO:0006163)	445	10	2.11	+	4.73	5.94e-05	0.00984
ribose phosphate metabolic process (GO:0019693)	457	10	2.17	+	4.6	7.37e-05	0.0116
small molecule catabolic process (GO:0044282)	417	9	1.98	+	4.54	0.00019	0.0272
nucleotide metabolic process (GO:0009117)	582	12	2.77	+	4.34	2.39e-05	0.00459
nucleoside phosphate metabolic process (GO:0006753)	587	12	2.79	+	4.3	2.6e-05	0.00487
oxidation-reduction process (GO:0055114)	945	19	4.49	+	4.23	1.11e-07	4.71e-05
nucleobase-containing small molecule metabolic process (GO:0055086)	668	13	3.17	+	4.1	1.94e-05	0.00382
organonitrogen compound biosynthetic process (GO:1901566)	1420	25	6.75	+	3.7	9.93e-09	5.39e-06
small molecule metabolic process (GO:0044281)	1813	30	8.62	+	3.48	8.98e-10	7.85e-07
heterocycle metabolic process (GO:0046483)	4768	58	22.66	+	2.56	3.5e-14	1.1e-10
cellular nitrogen compound metabolic process (GO:0034641)	5207	63	24.75	+	2.55	8.5e-16	6.69e-12
organic cyclic compound metabolic process (GO:1901360)	5017	60	23.84	+	2.52	1.67e-14	8.76e-11
nucleobase-containing compound metabolic process (GO:0006139)	4599	50	21.86	+	2.29	1.1e-09	8.67e-07
cellular aromatic compound metabolic process (GO:0006725)	4808	52	22.85	+	2.28	3.87e-10	3.58e-07
cellular nitrogen compound biosynthetic process (GO:0044271)	3551	38	16.88	+	2.25	5.81e-07	0.000183
negative regulation of macromolecule metabolic process (GO:0010605)	2538	27	12.06	+	2.24	4.36e-05	0.00746
gene expression (GO:0010467)	3773	39	17.93	+	2.18	7.04e-07	0.000213
organic substance biosynthetic process (GO:1901576)	4704	46	22.36	+	2.06	1.99e-07	7.82e-05
negative regulation of metabolic process (GO:0009892)	2777	27	13.2	+	2.05	0.000275	0.037
biosynthetic process (GO:0009058)	4763	46	22.64	+	2.03	2.64e-07	9.9e-05
cellular biosynthetic process (GO:0044249)	4621	43	21.96	+	1.96	2.68e-06	0.000702
organonitrogen compound metabolic process (GO:1901564)	5514	49	26.2	+	1.87	1.74e-06	0.00049
organic substance metabolic process (GO:0071704)	9419	82	44.76	+	1.83	2.68e-14	1.06e-10
nitrogen compound metabolic process (GO:0006807)	8613	74	40.93	+	1.81	2.81e-11	2.95e-08
cellular metabolic process (GO:0044237)	8963	77	42.6	+	1.81	3.53e-12	4.62e-09
primary metabolic process (GO:0044238)	9084	78	43.17	+	1.81	1.72e-12	2.47e-09
metabolic process (GO:0008152)	9876	82	46.93	+	1.75	9.2e-13	1.61e-09
macromolecule metabolic process (GO:0043170)	7705	56	36.62	+	1.53	9.95e-05	0.0152
cellular process (GO:0009987)	15063	92	71.59	+	1.29	9.59e-07	0.000285

## Sheet: PS_BP
Figure 2-source data 2: Gene Ontology Term Enrichment Analysis;
HIV-1 PS RNA Interactome; Biological Processes
Analysis Type:	PANTHER Overrepresentation Test (Released 20171205)
Annotation Version and Release Date:	GO Ontology database Released 2018-08-09
Analyzed List:	upload_1 (Homo sapiens)
Reference List:	Homo sapiens (all genes in database)
Test Type:	FISHER
GO biological process complete	Homo sapiens - REFLIST (21042)	upload_1 (97)	upload_1 (expected)	upload_1 (over/under)	upload_1 (fold Enrichment)	upload_1 (raw P-value)	upload_1 (FDR)
CRD-mediated mRNA stabilization (GO:0070934)	5	3	0.02	+	> 100	5.16e-06	0.00189
mRNA stabilization (GO:0048255)	36	4	0.17	+	24.1	3.35e-05	0.00723
regulation of mRNA stability (GO:0043488)	118	9	0.54	+	16.55	7.01e-09	5.52e-05
regulation of gene expression (GO:0010468)	4634	46	21.36	+	2.15	4.33e-08	6.19e-05
regulation of RNA stability (GO:0043487)	127	9	0.59	+	15.37	1.28e-08	5.04e-05
posttranscriptional regulation of gene expression (GO:0010608)	461	14	2.13	+	6.59	3.52e-08	5.54e-05
RNA stabilization (GO:0043489)	41	4	0.19	+	21.16	5.37e-05	0.0106
negative regulation of RNA catabolic process (GO:1902369)	50	5	0.23	+	21.69	5.32e-06	0.0019
histone H3-K4 trimethylation (GO:0080182)	15	3	0.07	+	43.39	7.27e-05	0.014
histone H3-K27 trimethylation (GO:0098532)	6	3	0.03	+	> 100	7.71e-06	0.00243
histone H3-K27 methylation (GO:0070734)	11	3	0.05	+	59.16	3.29e-05	0.00718
nucleosome positioning (GO:0016584)	16	5	0.07	+	67.79	3.52e-08	6.15e-05
chromatin assembly (GO:0031497)	134	6	0.62	+	9.71	4.57e-05	0.00921
negative regulation of chromatin silencing (GO:0031936)	20	5	0.09	+	54.23	9.06e-08	9.5e-05
negative regulation of gene silencing (GO:0060969)	34	5	0.16	+	31.9	9.33e-07	0.000612
regulation of chromatin silencing (GO:0031935)	32	5	0.15	+	33.89	7.11e-07	0.000509
positive regulation of gene expression, epigenetic (GO:0045815)	61	5	0.28	+	17.78	1.31e-05	0.0035
negative regulation of chromatin organization (GO:1905268)	60	5	0.28	+	18.08	1.22e-05	0.0033
chromosome condensation (GO:0030261)	40	6	0.18	+	32.54	6.45e-08	7.8e-05
positive regulation of mRNA splicing, via spliceosome (GO:0048026)	21	3	0.1	+	30.99	0.000177	0.0306
regulation of mRNA splicing, via spliceosome (GO:0048024)	96	7	0.44	+	15.82	4.76e-07	0.000357
regulation of RNA splicing (GO:0043484)	132	7	0.61	+	11.5	3.58e-06	0.00152
RNA splicing, via transesterification reactions (GO:0000375)	292	9	1.35	+	6.69	1.02e-05	0.00292
RNA splicing (GO:0008380)	387	11	1.78	+	6.17	2.14e-06	0.00102
negative regulation of DNA recombination (GO:0045910)	44	6	0.2	+	29.58	1.08e-07	0.000106
mRNA destabilization (GO:0061157)	24	3	0.11	+	27.12	0.000253	0.041
negative regulation of translation (GO:0017148)	126	9	0.58	+	15.49	1.2e-08	6.3e-05
regulation of translation (GO:0006417)	337	12	1.55	+	7.72	6.88e-08	7.74e-05
regulation of alternative mRNA splicing, via spliceosome (GO:0000381)	62	4	0.29	+	14	0.000241	0.0396
nucleosome assembly (GO:0006334)	118	6	0.54	+	11.03	2.31e-05	0.00542
mRNA transport (GO:0051028)	157	6	0.72	+	8.29	0.000106	0.019
mRNA splicing, via spliceosome (GO:0000398)	289	9	1.33	+	6.76	9.41e-06	0.00285
mRNA processing (GO:0006397)	459	13	2.12	+	6.14	2.46e-07	0.000215
RNA splicing, via transesterification reactions with bulged adenosine as nucleophile (GO:0000377)	289	9	1.33	+	6.76	9.41e-06	0.00279
negative regulation of mRNA catabolic process (GO:1902373)	43	4	0.2	+	20.18	6.39e-05	0.0124
positive regulation of mRNA metabolic process (GO:1903313)	72	6	0.33	+	18.08	1.57e-06	0.000853
negative regulation of mRNA metabolic process (GO:1903312)	72	6	0.33	+	18.08	1.57e-06	0.000824
regulation of mRNA metabolic process (GO:1903311)	262	18	1.21	+	14.9	5.99e-16	9.43e-12
regulation of mRNA processing (GO:0050684)	133	9	0.61	+	14.68	1.87e-08	4.9e-05
regulation of gene silencing (GO:0060968)	89	6	0.41	+	14.62	4.99e-06	0.00187
regulation of mRNA catabolic process (GO:0061013)	140	9	0.65	+	13.95	2.84e-08	6.39e-05
negative regulation of cellular amide metabolic process (GO:0034249)	142	9	0.65	+	13.75	3.19e-08	6.27e-05
regulation of DNA recombination (GO:0000018)	98	6	0.45	+	13.28	8.43e-06	0.0026
negative regulation of chromosome organization (GO:2001251)	133	6	0.61	+	9.79	4.39e-05	0.00908
regulation of gene expression, epigenetic (GO:0040029)	222	9	1.02	+	8.79	1.18e-06	0.000714
DNA packaging (GO:0006323)	176	7	0.81	+	8.63	2.17e-05	0.00516
negative regulation of DNA metabolic process (GO:0051053)	151	6	0.7	+	8.62	8.64e-05	0.0164
chromatin assembly or disassembly (GO:0006333)	155	6	0.71	+	8.4	9.92e-05	0.0184
nucleosome organization (GO:0034728)	156	6	0.72	+	8.34	0.000103	0.0188
DNA conformation change (GO:0071103)	247	9	1.14	+	7.9	2.75e-06	0.00124
regulation of chromatin organization (GO:1902275)	176	6	0.81	+	7.4	0.000194	0.0324
regulation of cellular amide metabolic process (GO:0034248)	386	12	1.78	+	6.74	2.84e-07	0.000235
regulation of chromosome organization (GO:0033044)	332	9	1.53	+	5.88	2.74e-05	0.00624
mRNA metabolic process (GO:0016071)	671	17	3.09	+	5.5	1.41e-08	4.45e-05
regulation of DNA metabolic process (GO:0051052)	406	10	1.87	+	5.34	2.14e-05	0.00519
RNA processing (GO:0006396)	837	15	3.86	+	3.89	7.54e-06	0.00247
regulation of cellular catabolic process (GO:0031329)	747	12	3.44	+	3.48	0.000183	0.031
chromosome organization (GO:0051276)	1013	16	4.67	+	3.43	1.71e-05	0.00427
negative regulation of gene expression (GO:0010629)	1681	23	7.75	+	2.97	2e-06	0.000981
negative regulation of cellular macromolecule biosynthetic process (GO:2000113)	1361	18	6.27	+	2.87	4.94e-05	0.00985
negative regulation of macromolecule biosynthetic process (GO:0010558)	1429	18	6.59	+	2.73	9.18e-05	0.0172
negative regulation of cellular biosynthetic process (GO:0031327)	1487	18	6.85	+	2.63	0.000151	0.0267
positive regulation of gene expression (GO:0010628)	1918	23	8.84	+	2.6	1.73e-05	0.00425
negative regulation of biosynthetic process (GO:0009890)	1510	18	6.96	+	2.59	0.000182	0.0312
positive regulation of nucleobase-containing compound metabolic process (GO:0045935)	1851	22	8.53	+	2.58	3.15e-05	0.00699
positive regulation of RNA metabolic process (GO:0051254)	1668	19	7.69	+	2.47	0.00021	0.0347
negative regulation of macromolecule metabolic process (GO:0010605)	2538	28	11.7	+	2.39	1.12e-05	0.00314
negative regulation of nitrogen compound metabolic process (GO:0051172)	2284	25	10.53	+	2.37	4.47e-05	0.00914
negative regulation of cellular metabolic process (GO:0031324)	2450	26	11.29	+	2.3	4.11e-05	0.00874
negative regulation of metabolic process (GO:0009892)	2777	29	12.8	+	2.27	1.54e-05	0.00398
nucleic acid metabolic process (GO:0090304)	3978	40	18.34	+	2.18	3.76e-07	0.000296
regulation of nucleobase-containing compound metabolic process (GO:0019219)	4187	42	19.3	+	2.18	1.61e-07	0.000149
regulation of RNA metabolic process (GO:0051252)	3925	39	18.09	+	2.16	1.2e-06	0.000698
RNA metabolic process (GO:0016070)	3455	34	15.93	+	2.13	1.19e-05	0.00327
gene expression (GO:0010467)	3773	36	17.39	+	2.07	7.57e-06	0.00243
cellular nitrogen compound metabolic process (GO:0034641)	5207	49	24	+	2.04	5.05e-08	6.62e-05
nucleobase-containing compound metabolic process (GO:0006139)	4599	43	21.2	+	2.03	8.59e-07	0.000588
regulation of cellular macromolecule biosynthetic process (GO:2000112)	4085	38	18.83	+	2.02	7.39e-06	0.00253
positive regulation of macromolecule metabolic process (GO:0010604)	3229	30	14.89	+	2.02	0.000106	0.0191
heterocycle metabolic process (GO:0046483)	4768	44	21.98	+	2	1.1e-06	0.00069
cellular aromatic compound metabolic process (GO:0006725)	4808	44	22.16	+	1.99	1.22e-06	0.000687
regulation of macromolecule biosynthetic process (GO:0010556)	4181	38	19.27	+	1.97	1.65e-05	0.00418
positive regulation of metabolic process (GO:0009893)	3478	31	16.03	+	1.93	0.000174	0.0304
regulation of cellular biosynthetic process (GO:0031326)	4308	38	19.86	+	1.91	2.39e-05	0.00553
organic cyclic compound metabolic process (GO:1901360)	5017	44	23.13	+	1.9	3.71e-06	0.00154
regulation of biosynthetic process (GO:0009889)	4381	38	20.2	+	1.88	4.32e-05	0.00907
regulation of nitrogen compound metabolic process (GO:0051171)	5961	49	27.48	+	1.78	4.41e-06	0.00174
regulation of macromolecule metabolic process (GO:0060255)	6209	51	28.62	+	1.78	2.98e-06	0.0013
regulation of cellular metabolic process (GO:0031323)	6173	50	28.46	+	1.76	5.36e-06	0.00187
regulation of metabolic process (GO:0019222)	6702	54	30.9	+	1.75	1.65e-06	0.000838
regulation of primary metabolic process (GO:0080090)	6123	49	28.23	+	1.74	9.71e-06	0.00283
macromolecule metabolic process (GO:0043170)	7705	58	35.52	+	1.63	4.11e-06	0.00166
nitrogen compound metabolic process (GO:0006807)	8613	63	39.7	+	1.59	2.25e-06	0.00104
primary metabolic process (GO:0044238)	9084	64	41.88	+	1.53	7.5e-06	0.00251
organic substance metabolic process (GO:0071704)	9419	66	43.42	+	1.52	4.86e-06	0.00187
cellular metabolic process (GO:0044237)	8963	62	41.32	+	1.5	3.06e-05	0.00687
metabolic process (GO:0008152)	9876	67	45.53	+	1.47	1.41e-05	0.0037

## Sheet: CS_BP
Figure 2-source data 2: Gene Ontology Term Enrichment Analysis;
HIV-1 CS RNA Interactome; Biological Processes
Analysis Type:	PANTHER Overrepresentation Test (Released 20171205)
Annotation Version and Release Date:	GO Ontology database Released 2018-08-09
Analyzed List:	upload_1 (Homo sapiens)
Reference List:	Homo sapiens (all genes in database)
Test Type:	FISHER
GO biological process complete	Homo sapiens - REFLIST (21042)	upload_1 (72)	upload_1 (expected)	upload_1 (over/under)	upload_1 (fold Enrichment)	upload_1 (raw P-value)	upload_1 (FDR)
protein localization to nuclear inner membrane (GO:0036228)	2	2	0.01	+	> 100	6.85e-05	0.0136
protein localization to nuclear envelope (GO:0090435)	9	3	0.03	+	97.42	8.18e-06	0.00234
protein localization to membrane (GO:0072657)	451	13	1.54	+	8.42	5.14e-09	2.31e-06
error-free translesion synthesis (GO:0070987)	20	3	0.07	+	43.84	6.41e-05	0.0131
SRP-dependent cotranslational protein targeting to membrane (GO:0006614)	94	10	0.32	+	31.09	2.25e-12	1.68e-09
cotranslational protein targeting to membrane (GO:0006613)	100	10	0.34	+	29.23	3.97e-12	2.72e-09
protein targeting to membrane (GO:0006612)	154	10	0.53	+	18.98	2.15e-10	1.09e-07
establishment of protein localization to membrane (GO:0090150)	244	11	0.83	+	13.18	1.01e-09	4.69e-07
protein targeting to ER (GO:0045047)	106	10	0.36	+	27.57	6.8e-12	4.28e-09
establishment of protein localization to endoplasmic reticulum (GO:0072599)	110	10	0.38	+	26.57	9.57e-12	5.38e-09
protein localization to endoplasmic reticulum (GO:0070972)	132	12	0.45	+	26.57	6.88e-14	1.35e-10
tRNA aminoacylation for protein translation (GO:0006418)	46	4	0.16	+	25.41	2.54e-05	0.0058
tRNA aminoacylation (GO:0043039)	49	4	0.17	+	23.86	3.21e-05	0.00711
amino acid activation (GO:0043038)	50	4	0.17	+	23.38	3.46e-05	0.00755
translation (GO:0006412)	387	18	1.32	+	13.59	1.36e-15	1.07e-11
translational initiation (GO:0006413)	146	12	0.5	+	24.02	2.11e-13	2.55e-10
nuclear-transcribed mRNA catabolic process, nonsense-mediated decay (GO:0000184)	119	9	0.41	+	22.1	5.13e-10	2.45e-07
nuclear-transcribed mRNA catabolic process (GO:0000956)	195	9	0.67	+	13.49	3.09e-08	1.28e-05
spindle organization (GO:0007051)	134	5	0.46	+	10.9	0.000113	0.0217
cell cycle process (GO:0022402)	947	13	3.24	+	4.01	1.92e-05	0.0045
antigen processing and presentation of peptide antigen (GO:0048002)	136	5	0.47	+	10.74	0.000121	0.0229
ER to Golgi vesicle-mediated transport (GO:0006888)	207	7	0.71	+	9.88	8.39e-06	0.00236
protein export from nucleus (GO:0006611)	153	5	0.52	+	9.55	0.000206	0.0352
DNA conformation change (GO:0071103)	247	6	0.85	+	7.1	0.000225	0.0381
protein-containing complex localization (GO:0031503)	259	6	0.89	+	6.77	0.000289	0.0459
regulation of translation (GO:0006417)	337	7	1.15	+	6.07	0.00017	0.0305
posttranscriptional regulation of gene expression (GO:0010608)	461	8	1.58	+	5.07	0.000192	0.034
viral process (GO:0016032)	589	11	2.02	+	5.46	5.59e-06	0.00169
neutrophil degranulation (GO:0043312)	483	8	1.65	+	4.84	0.000262	0.043
mitotic cell cycle process (GO:1903047)	591	9	2.02	+	4.45	0.000197	0.0344
protein-containing complex assembly (GO:0065003)	1555	16	5.32	+	3.01	6.22e-05	0.0129
positive regulation of catalytic activity (GO:0043085)	1399	14	4.79	+	2.92	0.000258	0.0428
peptide biosynthetic process (GO:0043043)	413	18	1.41	+	12.74	4.01e-15	2.11e-11
mRNA catabolic process (GO:0006402)	211	9	0.72	+	12.47	5.92e-08	2.27e-05
establishment of protein localization to organelle (GO:0072594)	413	16	1.41	+	11.32	9.29e-13	9.14e-10
amide biosynthetic process (GO:0043604)	525	20	1.8	+	11.13	1.1e-15	1.72e-11
protein targeting (GO:0006605)	343	13	1.17	+	11.08	2.07e-10	1.09e-07
RNA catabolic process (GO:0006401)	242	9	0.83	+	10.87	1.82e-07	6.51e-05
peptide metabolic process (GO:0006518)	529	19	1.81	+	10.5	1.79e-14	5.63e-11
nuclear export (GO:0051168)	162	5	0.55	+	9.02	0.000266	0.0431
antigen processing and presentation (GO:0019882)	165	5	0.56	+	8.86	0.000289	0.0454
nucleobase-containing compound catabolic process (GO:0034655)	404	12	1.38	+	8.68	1.54e-08	6.75e-06
protein localization to organelle (GO:0033365)	686	19	2.35	+	8.09	1.57e-12	1.45e-09
cellular amide metabolic process (GO:0043603)	773	21	2.64	+	7.94	1.17e-13	1.84e-10
heterocycle catabolic process (GO:0046700)	452	12	1.55	+	7.76	5.13e-08	2.07e-05
cellular nitrogen compound catabolic process (GO:0044270)	454	12	1.55	+	7.72	5.37e-08	2.11e-05
aromatic compound catabolic process (GO:0019439)	468	12	1.6	+	7.49	7.41e-08	2.78e-05
intracellular protein transport (GO:0006886)	943	23	3.23	+	7.13	5.49e-14	1.23e-10
organic cyclic compound catabolic process (GO:1901361)	501	12	1.71	+	7	1.52e-07	5.57e-05
Golgi vesicle transport (GO:0048193)	359	8	1.23	+	6.51	3.51e-05	0.00756
mRNA metabolic process (GO:0016071)	671	13	2.3	+	5.66	4.72e-07	0.000158
intracellular transport (GO:0046907)	1547	29	5.29	+	5.48	7.93e-15	3.12e-11
protein transport (GO:0015031)	1452	27	4.97	+	5.43	1.15e-13	2.01e-10
peptide transport (GO:0015833)	1476	27	5.05	+	5.35	1.69e-13	2.42e-10
amide transport (GO:0042886)	1504	27	5.15	+	5.25	2.63e-13	2.95e-10
establishment of protein localization (GO:0045184)	1528	27	5.23	+	5.16	3.81e-13	3.99e-10
organonitrogen compound biosynthetic process (GO:1901566)	1420	25	4.86	+	5.15	4.14e-12	2.72e-09
cellular protein localization (GO:0034613)	1495	26	5.12	+	5.08	1.74e-12	1.44e-09
cellular macromolecule localization (GO:0070727)	1504	26	5.15	+	5.05	1.99e-12	1.56e-09
establishment of localization in cell (GO:0051649)	1777	30	6.08	+	4.93	3.48e-14	9.11e-11
symbiont process (GO:0044403)	664	11	2.27	+	4.84	1.69e-05	0.00415
neutrophil activation involved in immune response (GO:0002283)	487	8	1.67	+	4.8	0.000277	0.0445
cellular macromolecule catabolic process (GO:0044265)	856	14	2.93	+	4.78	1.18e-06	0.000388
neutrophil mediated immunity (GO:0002446)	494	8	1.69	+	4.73	0.000304	0.0474
neutrophil activation (GO:0042119)	495	8	1.69	+	4.72	0.000309	0.0471
granulocyte activation (GO:0036230)	500	8	1.71	+	4.68	0.00033	0.0494
nitrogen compound transport (GO:0071705)	1765	28	6.04	+	4.64	1.58e-12	1.38e-09
interspecies interaction between organisms (GO:0044419)	709	11	2.43	+	4.53	3.05e-05	0.00687
protein localization (GO:0008104)	2049	29	7.01	+	4.14	8.76e-12	5.11e-09
organic substance transport (GO:0071702)	2122	30	7.26	+	4.13	3.3e-12	2.36e-09
macromolecule catabolic process (GO:0009057)	993	14	3.4	+	4.12	6.47e-06	0.00189
cellular localization (GO:0051641)	2359	33	8.07	+	4.09	1.98e-13	2.6e-10
macromolecule localization (GO:0033036)	2364	31	8.09	+	3.83	8.42e-12	5.1e-09
secretion (GO:0046903)	1085	12	3.71	+	3.23	0.000311	0.0471
negative regulation of gene expression (GO:0010629)	1681	16	5.75	+	2.78	0.000154	0.0279
transport (GO:0006810)	4399	40	15.05	+	2.66	1.4e-10	7.59e-08
establishment of localization (GO:0051234)	4513	40	15.44	+	2.59	3.13e-10	1.54e-07
organelle organization (GO:0006996)	3281	29	11.23	+	2.58	4.42e-07	0.000151
cellular component biogenesis (GO:0044085)	2665	22	9.12	+	2.41	5.58e-05	0.0117
cellular protein metabolic process (GO:0044267)	3660	29	12.52	+	2.32	5.28e-06	0.00163
cellular nitrogen compound biosynthetic process (GO:0044271)	3551	28	12.15	+	2.3	9.19e-06	0.00254
localization (GO:0051179)	5550	42	18.99	+	2.21	1.79e-08	7.62e-06
cellular nitrogen compound metabolic process (GO:0034641)	5207	38	17.82	+	2.13	3.6e-07	0.000126
nucleobase-containing compound metabolic process (GO:0006139)	4599	33	15.74	+	2.1	9.54e-06	0.00259
gene expression (GO:0010467)	3773	27	12.91	+	2.09	8.17e-05	0.0161
cellular biosynthetic process (GO:0044249)	4621	33	15.81	+	2.09	9.86e-06	0.00259
nucleic acid metabolic process (GO:0090304)	3978	28	13.61	+	2.06	0.000106	0.0207
cellular macromolecule biosynthetic process (GO:0034645)	3558	25	12.17	+	2.05	0.000228	0.0382
organic substance biosynthetic process (GO:1901576)	4704	33	16.1	+	2.05	1.19e-05	0.00308
biosynthetic process (GO:0009058)	4763	33	16.3	+	2.02	1.44e-05	0.00365
heterocycle metabolic process (GO:0046483)	4768	33	16.31	+	2.02	1.46e-05	0.00365
cellular component organization or biogenesis (GO:0071840)	5645	39	19.32	+	2.02	1.4e-06	0.00045
cellular aromatic compound metabolic process (GO:0006725)	4808	33	16.45	+	2.01	1.69e-05	0.00408
protein metabolic process (GO:0019538)	4411	30	15.09	+	1.99	6.7e-05	0.0135
cellular component organization (GO:0016043)	5471	36	18.72	+	1.92	1.83e-05	0.00436
organic cyclic compound metabolic process (GO:1901360)	5017	33	17.17	+	1.92	4.39e-05	0.00934
organonitrogen compound metabolic process (GO:1901564)	5514	34	18.87	+	1.8	0.000135	0.0246
cellular macromolecule metabolic process (GO:0044260)	6508	37	22.27	+	1.66	0.000308	0.0476
cellular metabolic process (GO:0044237)	8963	50	30.67	+	1.63	6.24e-06	0.00185
organic substance metabolic process (GO:0071704)	9419	52	32.23	+	1.61	3.81e-06	0.0012
macromolecule metabolic process (GO:0043170)	7705	42	26.36	+	1.59	0.000202	0.035
metabolic process (GO:0008152)	9876	52	33.79	+	1.54	2.4e-05	0.00556
cellular process (GO:0009987)	15063	67	51.54	+	1.3	9.68e-06	0.00258
biological_process (GO:0008150)	17703	71	60.57	+	1.17	0.000123	0.0228
Unclassified (UNCLASSIFIED)	3339	1	11.43	-	0.09	0.000123	0.0231

## Sheet: US_CC
Figure 2-source data 2: Gene Ontology Term Enrichment Analysis;
HIV-1 US RNA Interactome; Cellular Component
Analysis Type:	PANTHER Overrepresentation Test (Released 20190711)
Annotation Version and Release Date:	GO Ontology database Released 2019-10-08
Analyzed List:	upload_1 (Homo sapiens)
Reference List:	Homo sapiens (all genes in database)
Test Type:	FISHER
Correction:	FDR
GO cellular component complete	Homo sapiens - REFLIST (20996)	upload_1 (100)	upload_1 (expected)	upload_1 (over/under)	upload_1 (fold Enrichment)	upload_1 (raw P-value)	upload_1 (FDR)
succinate-CoA ligase complex (GO:0042709)	2	2	0.01	+	> 100	0.000133	0.00701
supraspliceosomal complex (GO:0044530)	3	2	0.01	+	> 100	0.00022	0.0111
CRD-mediated mRNA stability complex (GO:0070937)	6	4	0.03	+	> 100	9.77e-08	8.53e-06
histone pre-mRNA 3'end processing complex (GO:0071204)	6	2	0.03	+	69.99	0.000611	0.0241
mitochondrial nucleoid (GO:0042645)	44	8	0.21	+	38.17	1.21e-10	1.52e-08
nucleoid (GO:0009295)	44	8	0.21	+	38.17	1.21e-10	1.43e-08
cytoplasmic stress granule (GO:0010494)	66	10	0.31	+	31.81	2.66e-12	4.11e-10
nuclear euchromatin (GO:0005719)	30	4	0.14	+	27.99	1.98e-05	0.0012
euchromatin (GO:0000791)	38	4	0.18	+	22.1	4.63e-05	0.00266
organellar small ribosomal subunit (GO:0000314)	29	3	0.14	+	21.72	0.000464	0.0207
mitochondrial small ribosomal subunit (GO:0005763)	29	3	0.14	+	21.72	0.000464	0.0202
catalytic step 2 spliceosome (GO:0071013)	86	7	0.41	+	17.09	2.95e-07	2.47e-05
ribonucleoprotein granule (GO:0035770)	233	17	1.11	+	15.32	2.88e-15	7.22e-13
mitochondrial matrix (GO:0005759)	478	34	2.28	+	14.93	5.52e-30	1.11e-26
cytoplasmic ribonucleoprotein granule (GO:0036464)	222	13	1.06	+	12.29	8.81e-11	1.18e-08
polysome (GO:0005844)	75	4	0.36	+	11.2	0.000544	0.0232
small ribosomal subunit (GO:0015935)	77	4	0.37	+	10.91	0.000598	0.025
spliceosomal complex (GO:0005681)	189	9	0.9	+	10	4.29e-07	3.45e-05
P-body (GO:0000932)	88	4	0.42	+	9.54	0.000965	0.0359
organellar ribosome (GO:0000313)	90	4	0.43	+	9.33	0.00105	0.0375
mitochondrial ribosome (GO:0005761)	90	4	0.43	+	9.33	0.00105	0.0368
ribonucleoprotein complex (GO:1990904)	696	29	3.31	+	8.75	2.53e-19	1.69e-16
mitochondrial protein complex (GO:0098798)	267	11	1.27	+	8.65	8.57e-08	8.61e-06
ribosomal subunit (GO:0044391)	195	8	0.93	+	8.61	5.59e-06	0.000387
ribosome (GO:0005840)	245	9	1.17	+	7.71	3.38e-06	0.000261
mitochondrion (GO:0005739)	1622	45	7.73	+	5.83	1.19e-23	1.19e-20
mitochondrial inner membrane (GO:0005743)	480	10	2.29	+	4.37	0.000111	0.00605
organelle inner membrane (GO:0019866)	542	11	2.58	+	4.26	6.26e-05	0.00349
mitochondrial membrane (GO:0031966)	712	12	3.39	+	3.54	0.000162	0.00832
mitochondrial envelope (GO:0005740)	754	12	3.59	+	3.34	0.000271	0.013
supramolecular complex (GO:0099080)	1318	20	6.28	+	3.19	3.92e-06	0.000292
envelope (GO:0031975)	1206	15	5.74	+	2.61	0.000618	0.0238
organelle envelope (GO:0031967)	1206	15	5.74	+	2.61	0.000618	0.0234
catalytic complex (GO:1902494)	1403	17	6.68	+	2.54	0.000348	0.0163
organelle lumen (GO:0043233)	5878	70	28	+	2.5	4.51e-18	2.26e-15
intracellular organelle lumen (GO:0070013)	5878	70	28	+	2.5	4.51e-18	1.81e-15
membrane-enclosed lumen (GO:0031974)	5878	70	28	+	2.5	4.51e-18	1.51e-15
intracellular non-membrane-bounded organelle (GO:0043232)	4927	48	23.47	+	2.05	9.25e-08	8.85e-06
non-membrane-bounded organelle (GO:0043228)	4937	48	23.51	+	2.04	9.76e-08	8.9e-06
nuclear lumen (GO:0031981)	4758	42	22.66	+	1.85	1.95e-05	0.00122
nucleoplasm (GO:0005654)	3990	34	19	+	1.79	0.000462	0.0211
protein-containing complex (GO:0032991)	5498	46	26.19	+	1.76	2.98e-05	0.00176
intracellular membrane-bounded organelle (GO:0043231)	10912	90	51.97	+	1.73	5.97e-16	1.71e-13
nucleus (GO:0005634)	7530	58	35.86	+	1.62	8.35e-06	0.000541
cytosol (GO:0005829)	5211	40	24.82	+	1.61	0.00103	0.0374
cytoplasm (GO:0005737)	11491	88	54.73	+	1.61	1.76e-12	2.95e-10
membrane-bounded organelle (GO:0043227)	12629	92	60.15	+	1.53	1.45e-12	2.91e-10
intracellular organelle (GO:0043229)	12721	92	60.59	+	1.52	1.68e-12	3.07e-10
organelle (GO:0043226)	13759	94	65.53	+	1.43	2.02e-11	2.89e-09
intracellular (GO:0005622)	14526	98	69.18	+	1.42	1.88e-13	4.2e-11
cellular anatomical entity (GO:0110165)	18717	99	89.15	+	1.11	0.000267	0.0131
cellular_component (GO:0005575)	18907	99	90.05	+	1.1	0.000609	0.025
plasma membrane (GO:0005886)	5774	9	27.5	-	0.33	8.1e-06	0.000542
cell periphery (GO:0071944)	5900	9	28.1	-	0.32	5.2e-06	0.000373
integral component of membrane (GO:0016021)	5788	6	27.57	-	0.22	6.37e-08	6.73e-06
intrinsic component of membrane (GO:0031224)	5941	6	28.3	-	0.21	3.6e-08	4.02e-06
Unclassified (UNCLASSIFIED)	2089	1	9.95	-	0.1	0.000609	0.0245

## Sheet: PS_CC
Figure 2-source data 2: Gene Ontology Term Enrichment Analysis;
HIV-1 PS RNA Interactome; Cellular Component
Analysis Type:	PANTHER Overrepresentation Test (Released 20190711)
Annotation Version and Release Date:	GO Ontology database Released 2020-01-03
Analyzed List:	upload_1 (Homo sapiens)
Reference List:	Homo sapiens (all genes in database)
Test Type:	FISHER
Correction:	FDR
GO cellular component complete	Homo sapiens - REFLIST (20996)	upload_1 (95)	upload_1 (expected)	upload_1 (over/under)	upload_1 (fold Enrichment)	upload_1 (raw P-value)	upload_1 (FDR)
supraspliceosomal complex (GO:0044530)	3	2	0.01	+	> 100	0.000199	0.0114
CRD-mediated mRNA stability complex (GO:0070937)	6	4	0.03	+	> 100	7.94e-08	1.06e-05
histone pre-mRNA 3'end processing complex (GO:0071204)	6	2	0.03	+	73.67	0.000552	0.0284
nuclear euchromatin (GO:0005719)	30	6	0.14	+	44.2	1.24e-08	2.26e-06
euchromatin (GO:0000791)	38	6	0.17	+	34.9	4.38e-08	6.75e-06
cytoplasmic stress granule (GO:0010494)	68	8	0.31	+	26	1.84e-09	4.61e-07
mitochondrial nucleoid (GO:0042645)	44	4	0.2	+	20.09	6.46e-05	0.00431
nucleoid (GO:0009295)	44	4	0.2	+	20.09	6.46e-05	0.00417
nucleosome (GO:0000786)	75	5	0.34	+	14.73	3.07e-05	0.00246
ribonucleoprotein granule (GO:0035770)	234	15	1.06	+	14.17	3.77e-13	7.55e-10
DNA packaging complex (GO:0044815)	83	5	0.38	+	13.31	4.86e-05	0.00361
catalytic step 2 spliceosome (GO:0071013)	86	5	0.39	+	12.85	5.71e-05	0.00409
P-body (GO:0000932)	88	5	0.4	+	12.56	6.34e-05	0.00438
cytoplasmic ribonucleoprotein granule (GO:0036464)	224	12	1.01	+	11.84	7.02e-10	2.34e-07
spliceosomal complex (GO:0005681)	194	8	0.88	+	9.11	3.67e-06	0.00035
protein-DNA complex (GO:0032993)	172	7	0.78	+	8.99	1.66e-05	0.00139
ribonucleoprotein complex (GO:1990904)	710	20	3.21	+	6.23	7.03e-11	7.04e-08
nuclear speck (GO:0016607)	404	9	1.83	+	4.92	0.000103	0.00608
nuclear body (GO:0016604)	797	13	3.61	+	3.6	6.84e-05	0.00429
supramolecular complex (GO:0099080)	1324	21	5.99	+	3.51	4.36e-07	5.14e-05
chromosome (GO:0005694)	1720	18	7.78	+	2.31	0.000958	0.0457
nuclear lumen (GO:0031981)	4768	49	21.57	+	2.27	1.5e-09	4.3e-07
nucleoplasm (GO:0005654)	3994	41	18.07	+	2.27	1.05e-07	1.31e-05
organelle lumen (GO:0043233)	5887	56	26.64	+	2.1	5.28e-10	3.53e-07
intracellular organelle lumen (GO:0070013)	5887	56	26.64	+	2.1	5.28e-10	2.65e-07
membrane-enclosed lumen (GO:0031974)	5887	56	26.64	+	2.1	5.28e-10	2.12e-07
intracellular non-membrane-bounded organelle (GO:0043232)	4957	44	22.43	+	1.96	1.37e-06	0.000145
non-membrane-bounded organelle (GO:0043228)	4966	44	22.47	+	1.96	1.42e-06	0.000143
nucleus (GO:0005634)	7540	63	34.12	+	1.85	2.36e-09	5.26e-07
protein-containing complex (GO:0032991)	5560	46	25.16	+	1.83	6.13e-06	0.000535
cytosol (GO:0005829)	5228	39	23.65	+	1.65	0.000525	0.0277
intracellular membrane-bounded organelle (GO:0043231)	10959	77	49.59	+	1.55	6.34e-09	1.27e-06
membrane-bounded organelle (GO:0043227)	12661	82	57.29	+	1.43	4.01e-08	6.7e-06
intracellular organelle (GO:0043229)	12761	79	57.74	+	1.37	3.92e-06	0.000357
organelle (GO:0043226)	13794	84	62.41	+	1.35	6.29e-07	7e-05
cytoplasm (GO:0005737)	11544	70	52.23	+	1.34	0.000256	0.0142
intracellular (GO:0005622)	14571	88	65.93	+	1.33	6.64e-08	9.5e-06
plasma membrane (GO:0005886)	5757	12	26.05	-	0.46	0.000746	0.0374
integral component of membrane (GO:0016021)	5787	10	26.18	-	0.38	7.41e-05	0.0045
intrinsic component of membrane (GO:0031224)	5940	10	26.88	-	0.37	4.82e-05	0.00371
intrinsic component of plasma membrane (GO:0031226)	1719	0	7.78	-	< 0.01	0.000512	0.0277
integral component of plasma membrane (GO:0005887)	1643	0	7.43	-	< 0.01	0.000791	0.0386

## Sheet: CS_CC
Figure 2-source data 2: Gene Ontology Term Enrichment Analysis;
HIV-1 CS RNA Interactome; Cellular Component
Analysis Type:	PANTHER Overrepresentation Test (Released 20190711)
Annotation Version and Release Date:	GO Ontology database Released 2020-01-03
Analyzed List:	upload_1 (Homo sapiens)
Reference List:	Homo sapiens (all genes in database)
Test Type:	FISHER
Correction:	FDR
GO cellular component complete	Homo sapiens - REFLIST (20996)	upload_1 (72)	upload_1 (expected)	upload_1 (over/under)	upload_1 (fold Enrichment)	upload_1 (raw P-value)	upload_1 (FDR)
DNA replication factor C complex (GO:0005663)	5	2	0.02	+	> 100	0.000239	0.0137
aminoacyl-tRNA synthetase multienzyme complex (GO:0017101)	12	3	0.04	+	72.9	1.69e-05	0.00154
Derlin-1 retrotranslocation complex (GO:0036513)	8	2	0.03	+	72.9	0.000509	0.0249
Ctf18 RFC-like complex (GO:0031390)	8	2	0.03	+	72.9	0.000509	0.0243
cytosolic small ribosomal subunit (GO:0022627)	47	5	0.16	+	31.02	9.29e-07	9.79e-05
integral component of lumenal side of endoplasmic reticulum membrane (GO:0071556)	29	3	0.1	+	30.17	0.000177	0.0111
lumenal side of endoplasmic reticulum membrane (GO:0098553)	29	3	0.1	+	30.17	0.000177	0.0107
lumenal side of membrane (GO:0098576)	36	3	0.12	+	24.3	0.00032	0.0173
cytosolic ribosome (GO:0022626)	111	9	0.38	+	23.64	2.93e-10	1.96e-07
cytosolic large ribosomal subunit (GO:0022625)	61	4	0.21	+	19.12	7.25e-05	0.00519
small ribosomal subunit (GO:0015935)	77	5	0.26	+	18.94	9e-06	0.000859
ribosomal subunit (GO:0044391)	195	9	0.67	+	13.46	3.15e-08	5.74e-06
ATPase complex (GO:1904949)	90	4	0.31	+	12.96	0.000303	0.0169
ribosome (GO:0005840)	245	10	0.84	+	11.9	1.57e-08	4.5e-06
large ribosomal subunit (GO:0015934)	121	4	0.41	+	9.64	0.00089	0.0371
ribonucleoprotein complex (GO:1990904)	710	16	2.43	+	6.57	2.28e-09	1.14e-06
secretory granule lumen (GO:0034774)	320	6	1.1	+	5.47	0.000869	0.037
cytoplasmic vesicle lumen (GO:0060205)	324	6	1.11	+	5.4	0.000925	0.0378
vesicle lumen (GO:0031983)	326	6	1.12	+	5.37	0.000955	0.0383
cell cortex (GO:0005938)	328	6	1.12	+	5.33	0.000985	0.0387
focal adhesion (GO:0005925)	409	7	1.4	+	4.99	0.000543	0.0253
cell-substrate junction (GO:0030055)	416	7	1.43	+	4.91	0.0006	0.0273
extracellular exosome (GO:0070062)	2098	25	7.19	+	3.47	1.45e-08	4.84e-06
secretory granule (GO:0030141)	846	10	2.9	+	3.45	0.000636	0.0283
extracellular vesicle (GO:1903561)	2119	25	7.27	+	3.44	1.77e-08	4.42e-06
extracellular organelle (GO:0043230)	2124	25	7.28	+	3.43	1.85e-08	4.12e-06
endoplasmic reticulum membrane (GO:0005789)	1097	12	3.76	+	3.19	0.000351	0.0185
secretory vesicle (GO:0099503)	1016	11	3.48	+	3.16	0.00069	0.0301
nuclear outer membrane-endoplasmic reticulum membrane network (GO:0042175)	1119	12	3.84	+	3.13	0.000419	0.0215
endoplasmic reticulum (GO:0005783)	1447	15	4.96	+	3.02	0.000104	0.00719
protein-containing complex (GO:0032991)	5560	50	19.07	+	2.62	3.85e-14	7.71e-11
cytosol (GO:0005829)	5228	45	17.93	+	2.51	1.9e-11	1.9e-08
vesicle (GO:0031982)	3889	32	13.34	+	2.4	4.22e-07	4.97e-05
extracellular space (GO:0005615)	3358	26	11.52	+	2.26	3.11e-05	0.00271
intracellular non-membrane-bounded organelle (GO:0043232)	4957	37	17	+	2.18	4.03e-07	5.38e-05
non-membrane-bounded organelle (GO:0043228)	4966	37	17.03	+	2.17	4.16e-07	5.2e-05
nucleoplasm (GO:0005654)	3994	28	13.7	+	2.04	0.000111	0.00739
extracellular region (GO:0005576)	4391	30	15.06	+	1.99	6.47e-05	0.0048
endomembrane system (GO:0012505)	4585	30	15.72	+	1.91	0.000157	0.0101
nuclear lumen (GO:0031981)	4768	31	16.35	+	1.9	0.000181	0.0107
organelle lumen (GO:0043233)	5887	37	20.19	+	1.83	3.24e-05	0.00271
intracellular organelle lumen (GO:0070013)	5887	37	20.19	+	1.83	3.24e-05	0.0026
membrane-enclosed lumen (GO:0031974)	5887	37	20.19	+	1.83	3.24e-05	0.0025
nucleus (GO:0005634)	7540	46	25.86	+	1.78	1.7e-06	0.00017
intracellular membrane-bounded organelle (GO:0043231)	10959	59	37.58	+	1.57	1.84e-07	2.64e-05
cytoplasm (GO:0005737)	11544	61	39.59	+	1.54	1.39e-07	2.32e-05
membrane-bounded organelle (GO:0043227)	12661	65	43.42	+	1.5	1.97e-08	3.95e-06
intracellular organelle (GO:0043229)	12761	64	43.76	+	1.46	1.72e-07	2.65e-05
membrane (GO:0016020)	9898	48	33.94	+	1.41	0.00125	0.0463
intracellular (GO:0005622)	14571	70	49.97	+	1.4	3.29e-09	1.32e-06
organelle (GO:0043226)	13794	66	47.3	+	1.4	5.44e-07	6.06e-05
cellular anatomical entity (GO:0110165)	18739	72	64.26	+	1.12	0.000433	0.0217
cellular_component (GO:0005575)	18929	72	64.91	+	1.11	0.00106	0.0402
Unclassified (UNCLASSIFIED)	2067	0	7.09	-	< 0.01	0.00106	0.041
