# Supplementary material for: Identification of host proteins differentially associated with HIV-1 RNA splice variants
Source: eLife. 2021 Feb 25;10:e62470. doi: 10.7554/eLife.62470 (PMC7906601; doi:10.7554/eLife.62470)
Supplement: Figure 3—source data 1. [file elife-62470-fig3-data1.xlsx]

## Sheet: Figure 3-source data 1
Figure 3-source data 1: siRNA knockdown screen fluorescence data. Related to Figure 3.
		Infected Rep 1			Infected Rep 2			Uninfected Rep 1			Uninfected Rep 2			mCherry and CFP (infected minus average of uninfected) normalization to ACT-YFP				Ratio of CFP to mCherry		mCherry (YFP norm) intensity change relative to CTRL		CFP (YFP norm) intensity change relative to CTRL		CFP/mCherry Ratio change relative to CTRL		p-values for change in expression [CTRL vs Protein Target KD]			% change in expression relative to CTRL
siRNA	BioRep	mCherry (intensity / area)	YFP (intensity / area)	CFP (intensity / area)	mCherry (intensity / area)	YFP (intensity / area)	CFP (intensity / area)	mCherry (intensity / area)	YFP (intensity / area)	CFP (intensity / area)	mCherry (intensity / area)	YFP (intensity / area)	CFP (intensity / area)	M1 / Y1	M2 / Y2	C1 / Y1	C2 / Y2	C1 / M1	C2 / M2	M1 / CTRL	M2 / CTRL	C1 / CTRL	C2 / CTRL	C1/M1 CTRL	C2/M2 CTRL	M p-value	C p-value	C/M p-value	M % diff	C % diff	C/M % diff
CTRL	1	619.645	238.71	193.126	594.941	259.692	214.282	71.828	250.364	46.763	74.998	333.351	49.751	2.28827	2.00826	0.606883	0.639315	0.265215	0.318343	1.06517	0.934829	0.973975	1.02602	0.908958	1.09104	0.019198	0.00501355	0.0380302	-34.0655	-45.9639	-18.6483
CTRL	2	424.564	242.075	226.266	454.069	235.136	256.618	149.968	141.127	79.704	133.899	123.729	75.96	1.16753	1.32747	0.613174	0.760351	0.525187	0.572783	0.935898	1.0641	0.892847	1.10715	0.956651	1.04335
G3BP1	1	366.774	188.762	128.469	406.067	188.004	113.178	54.308	163.476	39.742	51.241	146.264	37.761	1.66347	1.87918	0.475294	0.395877	0.285725	0.210665	0.774332	0.874743	0.762791	0.635336	0.97925	0.722003
G3BP1	2	262.291	139.404	129.429	307.644	174.733	147.066	180.981	168.584	90.235	192.651	353.634	102.98	0.541412	0.691501	0.235442	0.288775	0.434866	0.417606	0.433997	0.554309	0.342828	0.420487	0.792126	0.760687
siRNA	BioRep	mCherry (intensity / area)	YFP (intensity / area)	CFP (intensity / area)	mCherry (intensity / area)	YFP (intensity / area)	CFP (intensity / area)	mCherry (intensity / area)	YFP (intensity / area)	CFP (intensity / area)	mCherry (intensity / area)	YFP (intensity / area)	CFP (intensity / area)	M1 / Y1	M2 / Y2	C1 / Y1	C2 / Y2	C1 / M1	C2 / M2	M1 / CTRL	M2 / CTRL	C1 / CTRL	C2 / CTRL	C1/M1 CTRL	C2/M2 CTRL	M p-value	C p-value	C/M p-value	M % diff	C % diff	C/M % diff
CTRL	1	619.645	238.71	193.126	594.941	259.692	214.282	71.828	250.364	46.763	74.998	333.351	49.751	2.28827	2.00826	0.606883	0.639315	0.265215	0.318343	1.06517	0.934829	0.973975	1.02602	0.908958	1.09104	0.0777093	0.00908985	0.00664212	-20.752	-38.8546	-23.8742
CTRL	2	424.564	242.075	226.266	454.069	235.136	256.618	149.968	141.127	79.704	133.899	123.729	75.96	1.16753	1.32747	0.613174	0.760351	0.525187	0.572783	0.935898	1.0641	0.892847	1.10715	0.956651	1.04335
PRRC2A	1	341.774	151.912	113.624	456.558	190.044	127.308	53.772	146.335	40.488	50.917	223.395	37.633	1.90524	2.12695	0.490834	0.464353	0.257622	0.218319	0.886878	0.990078	0.78773	0.745232	0.882936	0.748234
PRRC2A	2	298.477	176.334	145.864	452.391	321.295	208.167	145.278	247.999	86.206	193.479	894.62	106.927	0.732125	0.880849	0.279569	0.347346	0.38186	0.394331	0.586873	0.706091	0.407082	0.505773	0.695573	0.71829
siRNA	BioRep	mCherry (intensity / area)	YFP (intensity / area)	CFP (intensity / area)	mCherry (intensity / area)	YFP (intensity / area)	CFP (intensity / area)	mCherry (intensity / area)	YFP (intensity / area)	CFP (intensity / area)	mCherry (intensity / area)	YFP (intensity / area)	CFP (intensity / area)	M1 / Y1	M2 / Y2	C1 / Y1	C2 / Y2	C1 / M1	C2 / M2	M1 / CTRL	M2 / CTRL	C1 / CTRL	C2 / CTRL	C1/M1 CTRL	C2/M2 CTRL	M p-value	C p-value	C/M p-value	M % diff	C % diff	C/M % diff
CTRL	1	619.645	238.71	193.126	594.941	259.692	214.282	71.828	250.364	46.763	74.998	333.351	49.751	2.28827	2.00826	0.606883	0.639315	0.265215	0.318343	1.06517	0.934829	0.973975	1.02602	0.908958	1.09104	0.0217145	0.000616122	0.00050906	-27.7533	-56.3107	-40.4912
CTRL	2	424.564	242.075	226.266	454.069	235.136	256.618	149.968	141.127	79.704	133.899	123.729	75.96	1.16753	1.32747	0.613174	0.760351	0.525187	0.572783	0.935898	1.0641	0.892847	1.10715	0.956651	1.04335
FAM120A	1	275.12	167.741	81.59	510.37	226.95	130.146	57.5	177.967	40.262	57.25	198.969	40.117	1.2981	1.99601	0.246812	0.396371	0.190133	0.198582	0.604257	0.929129	0.396104	0.636129	0.651633	0.680589
FAM120A	2	256.296	190.077	114.903	420.597	310.072	169.873	135.556	255.643	85.406	103.098	123.101	70.4	0.720597	0.971613	0.194658	0.296609	0.270134	0.305274	0.577633	0.778848	0.283443	0.431894	0.492061	0.55607
siRNA	BioRep	mCherry (intensity / area)	YFP (intensity / area)	CFP (intensity / area)	mCherry (intensity / area)	YFP (intensity / area)	CFP (intensity / area)	mCherry (intensity / area)	YFP (intensity / area)	CFP (intensity / area)	mCherry (intensity / area)	YFP (intensity / area)	CFP (intensity / area)	M1 / Y1	M2 / Y2	C1 / Y1	C2 / Y2	C1 / M1	C2 / M2	M1 / CTRL	M2 / CTRL	C1 / CTRL	C2 / CTRL	C1/M1 CTRL	C2/M2 CTRL	M p-value	C p-value	C/M p-value	M % diff	C % diff	C/M % diff
CTRL	1	619.645	238.71	193.126	594.941	259.692	214.282	71.828	250.364	46.763	74.998	333.351	49.751	2.28827	2.00826	0.606883	0.639315	0.265215	0.318343	1.06517	0.934829	0.973975	1.02602	0.908958	1.09104	0.0522493	0.00450359	0.00460784	-25.2546	-45.6213	-28.4737
CTRL	2	424.564	242.075	226.266	454.069	235.136	256.618	149.968	141.127	79.704	133.899	123.729	75.96	1.16753	1.32747	0.613174	0.760351	0.525187	0.572783	0.935898	1.0641	0.892847	1.10715	0.956651	1.04335
PMPCB	1	275.66	136.129	92.089	397.115	167.183	110.492	48.003	90.227	36.01	46.479	95.744	34.995	1.67796	2.09276	0.415683	0.448547	0.247731	0.214333	0.781078	0.974165	0.667122	0.719865	0.849036	0.734572
PMPCB	2	230.768	145.806	121.67	308.706	183.69	150.079	128.999	248.524	82.655	151.135	253.487	97.832	0.622066	0.918063	0.215536	0.325742	0.346485	0.354814	0.49865	0.735922	0.313844	0.474315	0.631136	0.646309
siRNA	BioRep	mCherry (intensity / area)	YFP (intensity / area)	CFP (intensity / area)	mCherry (intensity / area)	YFP (intensity / area)	CFP (intensity / area)	mCherry (intensity / area)	YFP (intensity / area)	CFP (intensity / area)	mCherry (intensity / area)	YFP (intensity / area)	CFP (intensity / area)	M1 / Y1	M2 / Y2	C1 / Y1	C2 / Y2	C1 / M1	C2 / M2	M1 / CTRL	M2 / CTRL	C1 / CTRL	C2 / CTRL	C1/M1 CTRL	C2/M2 CTRL	M p-value	C p-value	C/M p-value	M % diff	C % diff	C/M % diff
CTRL	1	619.645	238.71	193.126	594.941	259.692	214.282	71.828	250.364	46.763	74.998	333.351	49.751	2.28827	2.00826	0.606883	0.639315	0.265215	0.318343	1.06517	0.934829	0.973975	1.02602	0.908958	1.09104	0.0364439	0.00140803	0.0197035	-40.8571	-58.3806	-25.0962
CTRL	2	424.564	242.075	226.266	454.069	235.136	256.618	149.968	141.127	79.704	133.899	123.729	75.96	1.16753	1.32747	0.613174	0.760351	0.525187	0.572783	0.935898	1.0641	0.892847	1.10715	0.956651	1.04335
HNRNPR	1	524.775	300.378	124.336	773.869	432.007	192.345	48.635	129.326	37.382	50.437	302.878	38.601	1.58214	1.67667	0.287453	0.357294	0.181686	0.213097	0.736473	0.780478	0.461328	0.573415	0.622685	0.730338
HNRNPR	2	149.284	129.62	81.487	389.741	304.445	170.882	120.632	173.97	71.998	129.022	177.756	65.693	0.188682	0.870154	0.0975274	0.335156	0.516887	0.385168	0.151248	0.697518	0.14201	0.488023	0.941531	0.7016
siRNA	BioRep	mCherry (intensity / area)	YFP (intensity / area)	CFP (intensity / area)	mCherry (intensity / area)	YFP (intensity / area)	CFP (intensity / area)	mCherry (intensity / area)	YFP (intensity / area)	CFP (intensity / area)	mCherry (intensity / area)	YFP (intensity / area)	CFP (intensity / area)	M1 / Y1	M2 / Y2	C1 / Y1	C2 / Y2	C1 / M1	C2 / M2	M1 / CTRL	M2 / CTRL	C1 / CTRL	C2 / CTRL	C1/M1 CTRL	C2/M2 CTRL	M p-value	C p-value	C/M p-value	M % diff	C % diff	C/M % diff
CTRL	1	619.645	238.71	193.126	594.941	259.692	214.282	71.828	250.364	46.763	74.998	333.351	49.751	2.28827	2.00826	0.606883	0.639315	0.265215	0.318343	1.06517	0.934829	0.973975	1.02602	0.908958	1.09104	0.00374107	0.0216255	0.0105775	-73.0856	-58.3002	69.0583
CTRL	2	424.564	242.075	226.266	454.069	235.136	256.618	149.968	141.127	79.704	133.899	123.729	75.96	1.16753	1.32747	0.613174	0.760351	0.525187	0.572783	0.935898	1.0641	0.892847	1.10715	0.956651	1.04335
RPL15	1	142.716	96.348	92.518	152.118	104.969	82.59	52.297	72.515	40.338	51.897	85.583	39.451	0.940538	0.952862	0.546182	0.406744	0.580712	0.426865		0.443551		0.652776		1.46297
RPL15	2	118.661	94.644	85.535	114.111	81.252	81.865	113.873	145.341	77.012	101.078	90.345	70.5	0.118185	0.0816657	0.124456	0.0998006	1.05306	1.22206	0.0947374		0.181221		1.91819
siRNA	BioRep	mCherry (intensity / area)	YFP (intensity / area)	CFP (intensity / area)	mCherry (intensity / area)	YFP (intensity / area)	CFP (intensity / area)	mCherry (intensity / area)	YFP (intensity / area)	CFP (intensity / area)	mCherry (intensity / area)	YFP (intensity / area)	CFP (intensity / area)	M1 / Y1	M2 / Y2	C1 / Y1	C2 / Y2	C1 / M1	C2 / M2	M1 / CTRL	M2 / CTRL	C1 / CTRL	C2 / CTRL	C1/M1 CTRL	C2/M2 CTRL	M p-value	C p-value	C/M p-value	M % diff	C % diff	C/M % diff
CTRL	1	619.645	238.71	193.126	594.941	259.692	214.282	71.828	250.364	46.763	74.998	333.351	49.751	2.28827	2.00826	0.606883	0.639315	0.265215	0.318343	1.06517	0.934829	0.973975	1.02602	0.908958	1.09104	0.790656	0.0327497	0.000478097	-6.35428	-37.8092	-32.413
CTRL	2	424.564	242.075	226.266	454.069	235.136	256.618	149.968	141.127	79.704	133.899	123.729	75.96	1.16753	1.32747	0.613174	0.760351	0.525187	0.572783	0.935898	1.0641	0.892847	1.10715	0.956651	1.04335
IGF2BP1	1	537.267	323.374	144.189	853.665	232.096	185.421	51.298	197.694	40.674	50.563	221.806	39.077	1.50394	3.45863	0.322579	0.627092	0.214488	0.181312	0.700075	1.60997	0.5177	1.00641	0.735105	0.621402
IGF2BP1	2	352.279	276.008	158.82	386.438	268.871	169.697	134.292	346.018	78.558	116.978	282.355	69.856	0.82115	0.969993	0.30656	0.355152	0.37333	0.366138	0.658236	0.777549	0.446384	0.517139	0.680036	0.666937
siRNA	BioRep	mCherry (intensity / area)	YFP (intensity / area)	CFP (intensity / area)	mCherry (intensity / area)	YFP (intensity / area)	CFP (intensity / area)	mCherry (intensity / area)	YFP (intensity / area)	CFP (intensity / area)	mCherry (intensity / area)	YFP (intensity / area)	CFP (intensity / area)	M1 / Y1	M2 / Y2	C1 / Y1	C2 / Y2	C1 / M1	C2 / M2	M1 / CTRL	M2 / CTRL	C1 / CTRL	C2 / CTRL	C1/M1 CTRL	C2/M2 CTRL	M p-value	C p-value	C/M p-value	M % diff	C % diff	C/M % diff
CTRL	1	619.645	238.71	193.126	594.941	259.692	214.282	71.828	250.364	46.763	74.998	333.351	49.751	2.28827	2.00826	0.606883	0.639315	0.265215	0.318343	1.06517	0.934829	0.973975	1.02602	0.908958	1.09104	0.180157	0.0782906	0.0825053	-34.1797	-47.8884	-24.9175
CTRL	2	424.564	242.075	226.266	454.069	235.136	256.618	149.968	141.127	79.704	133.899	123.729	75.96	1.16753	1.32747	0.613174	0.760351	0.525187	0.572783	0.935898	1.0641	0.892847	1.10715	0.956651	1.04335
RPL29	1	712.312	231.815	210.41	258.391	206.821	67.372	53.725	106.384	40.53	52.682	123.967	40.289	2.84325	0.992102	0.733346	0.130366	0.257925	0.131404	1.32351	0.461816	1.17693	0.209223	0.883973	0.450355
RPL29	2	227.454	148.398	131.297	290.18	240.748	146.089	143.035	348.19	88.651	165.589	515.194	97.168	0.492877	0.564358	0.258679	0.220893	0.524835	0.391406	0.395092	0.452391	0.376665	0.321644	0.95601	0.712962
siRNA	BioRep	mCherry (intensity / area)	YFP (intensity / area)	CFP (intensity / area)	mCherry (intensity / area)	YFP (intensity / area)	CFP (intensity / area)	mCherry (intensity / area)	YFP (intensity / area)	CFP (intensity / area)	mCherry (intensity / area)	YFP (intensity / area)	CFP (intensity / area)	M1 / Y1	M2 / Y2	C1 / Y1	C2 / Y2	C1 / M1	C2 / M2	M1 / CTRL	M2 / CTRL	C1 / CTRL	C2 / CTRL	C1/M1 CTRL	C2/M2 CTRL	M p-value	C p-value	C/M p-value	M % diff	C % diff	C/M % diff
CTRL	1	619.645	238.71	193.126	594.941	259.692	214.282	71.828	250.364	46.763	74.998	333.351	49.751	2.28827	2.00826	0.606883	0.639315	0.265215	0.318343	1.06517	0.934829	0.973975	1.02602	0.908958	1.09104	0.23676	0.0457951	0.0174925	-18.2038	-34.8672	-21.4394
CTRL	2	424.564	242.075	226.266	454.069	235.136	256.618	149.968	141.127	79.704	133.899	123.729	75.96	1.16753	1.32747	0.613174	0.760351	0.525187	0.572783	0.935898	1.0641	0.892847	1.10715	0.956651	1.04335
ALOX12B	1	362.059	200.024	99.017	561.97	194.944	166.479	54.665	203.703	42.461	51.995	166.236	39.498	1.54346	2.60916	0.290153	0.643772	0.187988	0.246735	0.718469	1.21454	0.465661	1.03318	0.644283	0.845623
ALOX12B	2	275.389	180.964	138.905	368.936	270.64	191.838	116.971	163.633	73.2	146.515	327.082	82.214	0.793782	0.876415	0.338178	0.421708	0.426033	0.481174	0.636298	0.702537	0.492423	0.614052	0.776038	0.876478
siRNA	BioRep	mCherry (intensity / area)	YFP (intensity / area)	CFP (intensity / area)	mCherry (intensity / area)	YFP (intensity / area)	CFP (intensity / area)	mCherry (intensity / area)	YFP (intensity / area)	CFP (intensity / area)	mCherry (intensity / area)	YFP (intensity / area)	CFP (intensity / area)	M1 / Y1	M2 / Y2	C1 / Y1	C2 / Y2	C1 / M1	C2 / M2	M1 / CTRL	M2 / CTRL	C1 / CTRL	C2 / CTRL	C1/M1 CTRL	C2/M2 CTRL	M p-value	C p-value	C/M p-value	M % diff	C % diff	C/M % diff
CTRL	1	619.645	238.71	193.126	594.941	259.692	214.282	71.828	250.364	46.763	74.998	333.351	49.751	2.28827	2.00826	0.606883	0.639315	0.265215	0.318343	1.06517	0.934829	0.973975	1.02602	0.908958	1.09104	0.118847	0.0476589	0.0440353	-25.4556	-39.5065	-21.4209
CTRL	2	424.564	242.075	226.266	454.069	235.136	256.618	149.968	141.127	79.704	133.899	123.729	75.96	1.16753	1.32747	0.613174	0.760351	0.525187	0.572783	0.935898	1.0641	0.892847	1.10715	0.956651	1.04335
IGF2BP3	1	643.825	327.747	177.716	899.686	362.198	269.561	55.342	182.662	41.339	56.186	236.294	41.984	1.79425	2.33	0.415121	0.629212	0.231361	0.270048	0.835212	1.0846	0.666219	1.00981	0.792932	0.925522
IGF2BP3	2	462.039	547.501	234.312	334.706	290.923	145.356	127.818	412.144	79.744	126.599	327.887	78.64	0.611561	0.713239	0.283324	0.227428	0.463279	0.318866	0.490229	0.571734	0.41255	0.331159	0.843883	0.580829
siRNA	BioRep	mCherry (intensity / area)	YFP (intensity / area)	CFP (intensity / area)	mCherry (intensity / area)	YFP (intensity / area)	CFP (intensity / area)	mCherry (intensity / area)	YFP (intensity / area)	CFP (intensity / area)	mCherry (intensity / area)	YFP (intensity / area)	CFP (intensity / area)	M1 / Y1	M2 / Y2	C1 / Y1	C2 / Y2	C1 / M1	C2 / M2	M1 / CTRL	M2 / CTRL	C1 / CTRL	C2 / CTRL	C1/M1 CTRL	C2/M2 CTRL	M p-value	C p-value	C/M p-value	M % diff	C % diff	C/M % diff
CTRL	1	619.645	238.71	193.126	594.941	259.692	214.282	71.828	250.364	46.763	74.998	333.351	49.751	2.28827	2.00826	0.606883	0.639315	0.265215	0.318343	1.06517	0.934829	0.973975	1.02602	0.908958	1.09104	0.986992	0.680898	0.539826	-0.354852	13.186	7.35717
CTRL	2	424.564	242.075	226.266	454.069	235.136	256.618	149.968	141.127	79.704	133.899	123.729	75.96	1.16753	1.32747	0.613174	0.760351	0.525187	0.572783	0.935898	1.0641	0.892847	1.10715	0.956651	1.04335
SLTM	1	1027.55	331.725	400.516	1068.83	367.938	375.196	52.009	200.591	40.524	49.886	321.284	38.519	2.944	2.76644	1.08823	0.912313	0.369645	0.329779	1.37041	1.28776	1.74649	1.46415	1.26687	1.13023
SLTM	2	498.051	356.549	312.958	298.234	282.767	156.334	133.097	269.549	86.293	117.752	189.855	79.698	1.04509	0.611137	0.644967	0.25936	0.617139	0.424389	0.837749	0.48989	0.939142	0.377656	1.12415	0.773043
siRNA	BioRep	mCherry (intensity / area)	YFP (intensity / area)	CFP (intensity / area)	mCherry (intensity / area)	YFP (intensity / area)	CFP (intensity / area)	mCherry (intensity / area)	YFP (intensity / area)	CFP (intensity / area)	mCherry (intensity / area)	YFP (intensity / area)	CFP (intensity / area)	M1 / Y1	M2 / Y2	C1 / Y1	C2 / Y2	C1 / M1	C2 / M2	M1 / CTRL	M2 / CTRL	C1 / CTRL	C2 / CTRL	C1/M1 CTRL	C2/M2 CTRL	M p-value	C p-value	C/M p-value	M % diff	C % diff	C/M % diff
CTRL	1	619.645	238.71	193.126	594.941	259.692	214.282	71.828	250.364	46.763	74.998	333.351	49.751	2.28827	2.00826	0.606883	0.639315	0.265215	0.318343	1.06517	0.934829	0.973975	1.02602	0.908958	1.09104	0.0335546	0.000995574	0.0177332	-27.5282	-48.6086	-27.8698
CTRL	2	424.564	242.075	226.266	454.069	235.136	256.618	149.968	141.127	79.704	133.899	123.729	75.96	1.16753	1.32747	0.613174	0.760351	0.525187	0.572783	0.935898	1.0641	0.892847	1.10715	0.956651	1.04335
CASP14	1	710.83	422.914	144.811	493.422	221.385	125.736	54.689	198.846	41.425	54.975	281.752	42.112	1.55114	1.98112	0.243649	0.379283	0.157077	0.191449	0.722044	0.922197	0.391028	0.608704	0.538343	0.656142
CASP14	2	176.965	102.961	108.111	277.188	165.962	153.917	109.25	162.587	77.293	122.521	190.095	81.848	0.593229	0.971924	0.277197	0.447973	0.467268	0.460914	0.475535	0.779097	0.403629	0.652297	0.851148	0.839573
siRNA	BioRep	mCherry (intensity / area)	YFP (intensity / area)	CFP (intensity / area)	mCherry (intensity / area)	YFP (intensity / area)	CFP (intensity / area)	mCherry (intensity / area)	YFP (intensity / area)	CFP (intensity / area)	mCherry (intensity / area)	YFP (intensity / area)	CFP (intensity / area)	M1 / Y1	M2 / Y2	C1 / Y1	C2 / Y2	C1 / M1	C2 / M2	M1 / CTRL	M2 / CTRL	C1 / CTRL	C2 / CTRL	C1/M1 CTRL	C2/M2 CTRL	M p-value	C p-value	C/M p-value	M % diff	C % diff	C/M % diff
CTRL	1	619.645	238.71	193.126	594.941	259.692	214.282	71.828	250.364	46.763	74.998	333.351	49.751	2.28827	2.00826	0.606883	0.639315	0.265215	0.318343	1.06517	0.934829	0.973975	1.02602	0.908958	1.09104	0.000304163	0.0348459	0.431417	45.4996	36.7004	-6.60014
CTRL	2	424.564	242.075	226.266	454.069	235.136	256.618	149.968	141.127	79.704	133.899	123.729	75.96	1.16753	1.32747	0.613174	0.760351	0.525187	0.572783	0.935898	1.0641	0.892847	1.10715	0.956651	1.04335
LRPPRC	1	913.4	275.073	315.611	695.487	206.358	199.108	52.664	163.979	41.169	49.649	275.919	38.762	3.1346	3.12239	1.00208	0.771196	0.319684	0.246989	1.45913	1.45345	1.60822	1.23768	1.09564	0.846492
LRPPRC	2	533.37	258.535	259.078	903.697	408.3	503.109	104.028	72.158	69.187	101.565	108.146	68.07	1.66544	1.96155	0.736649	1.06412	0.442316	0.54249	1.33502	1.57238	1.07264	1.54947	0.805697	0.988168
siRNA	BioRep	mCherry (intensity / area)	YFP (intensity / area)	CFP (intensity / area)	mCherry (intensity / area)	YFP (intensity / area)	CFP (intensity / area)	mCherry (intensity / area)	YFP (intensity / area)	CFP (intensity / area)	mCherry (intensity / area)	YFP (intensity / area)	CFP (intensity / area)	M1 / Y1	M2 / Y2	C1 / Y1	C2 / Y2	C1 / M1	C2 / M2	M1 / CTRL	M2 / CTRL	C1 / CTRL	C2 / CTRL	C1/M1 CTRL	C2/M2 CTRL	M p-value	C p-value	C/M p-value	M % diff	C % diff	C/M % diff
CTRL	1	619.645	238.71	193.126	594.941	259.692	214.282	71.828	250.364	46.763	74.998	333.351	49.751	2.28827	2.00826	0.606883	0.639315	0.265215	0.318343	1.06517	0.934829	0.973975	1.02602	0.908958	1.09104	0.319891	0.293647	0.652162	-9.25317	-11.6957	-3.13358
CTRL	2	424.564	242.075	226.266	454.069	235.136	256.618	149.968	141.127	79.704	133.899	123.729	75.96	1.16753	1.32747	0.613174	0.760351	0.525187	0.572783	0.935898	1.0641	0.892847	1.10715	0.956651	1.04335
TCOF1	1	669.859	279.725	220.004	632.86	262.402	194.096	51.638	128.787	40.576	50.737	154.338	39.235	2.21171	2.21672	0.643841	0.587612	0.291105	0.265081	1.02954	1.03187	1.03329	0.943047	0.99769	0.908499
TCOF1	2	394.054	267.421	247.515	435.394	366.671	230.744	108.75	170.954	74.87	109.073	212.503	75.553	1.06627	0.890396	0.644316	0.424175	0.604272	0.476388	0.854724	0.713744	0.938193	0.617644	1.10071	0.867762
siRNA	BioRep	mCherry (intensity / area)	YFP (intensity / area)	CFP (intensity / area)	mCherry (intensity / area)	YFP (intensity / area)	CFP (intensity / area)	mCherry (intensity / area)	YFP (intensity / area)	CFP (intensity / area)	mCherry (intensity / area)	YFP (intensity / area)	CFP (intensity / area)	M1 / Y1	M2 / Y2	C1 / Y1	C2 / Y2	C1 / M1	C2 / M2	M1 / CTRL	M2 / CTRL	C1 / CTRL	C2 / CTRL	C1/M1 CTRL	C2/M2 CTRL	M p-value	C p-value	C/M p-value	M % diff	C % diff	C/M % diff
CTRL	1	619.645	238.71	193.126	594.941	259.692	214.282	71.828	250.364	46.763	74.998	333.351	49.751	2.28827	2.00826	0.606883	0.639315	0.265215	0.318343	1.06517	0.934829	0.973975	1.02602	0.908958	1.09104	0.203321	0.0495729	0.00577981	17.0802	82.0427	51.7642
CTRL	2	424.564	242.075	226.266	454.069	235.136	256.618	149.968	141.127	79.704	133.899	123.729	75.96	1.16753	1.32747	0.613174	0.760351	0.525187	0.572783	0.935898	1.0641	0.892847	1.10715	0.956651	1.04335
CSDE1	1	1020.6	379.29	459.886	1156.65	344.692	643.804	58.576	154.617	46.779	58.69	238.407	48.831	2.53624	3.18551	1.08645	1.72908	0.428372	0.542795	1.1806	1.48283	1.74363	2.77496	1.46814	1.86029
CSDE1	2	627.588	403.058	474.372	1126.3	866.723	837.451	96.578	92.415	70.331	88.792	74.193	64.782	1.32711	1.19256	1.00932	0.888282	0.760541	0.744855	1.06382	0.955958	1.46968	1.29343	1.38536	1.35678
siRNA	BioRep	mCherry (intensity / area)	YFP (intensity / area)	CFP (intensity / area)	mCherry (intensity / area)	YFP (intensity / area)	CFP (intensity / area)	mCherry (intensity / area)	YFP (intensity / area)	CFP (intensity / area)	mCherry (intensity / area)	YFP (intensity / area)	CFP (intensity / area)	M1 / Y1	M2 / Y2	C1 / Y1	C2 / Y2	C1 / M1	C2 / M2	M1 / CTRL	M2 / CTRL	C1 / CTRL	C2 / CTRL	C1/M1 CTRL	C2/M2 CTRL	M p-value	C p-value	C/M p-value	M % diff	C % diff	C/M % diff
CTRL	1	619.645	238.71	193.126	594.941	259.692	214.282	71.828	250.364	46.763	74.998	333.351	49.751	2.28827	2.00826	0.606883	0.639315	0.265215	0.318343	1.06517	0.934829	0.973975	1.02602	0.908958	1.09104	0.00219359	0.000936283	0.0520285	49.4228	95.2443	31.9594
CTRL	2	424.564	242.075	226.266	454.069	235.136	256.618	149.968	141.127	79.704	133.899	123.729	75.96	1.16753	1.32747	0.613174	0.760351	0.525187	0.572783	0.935898	1.0641	0.892847	1.10715	0.956651	1.04335
MBOAT7	1	698.976	239.902	328.824	1091.06	310.389	506.793	59.424	159.1	44.552	60.071	295.032	45.223	2.66454	3.32264	1.18355	1.48815	0.444186	0.447882	1.24032	1.54667	1.89946	2.38831	1.52234	1.535
MBOAT7	2	594.344	196.312	322.774	1204.51	531.662	761.085	239.124	227.558	115.976	137.564	104.714	72.395	2.06814	1.91129	1.16441	1.25437	0.563026	0.656293	1.65782	1.5321	1.69551	1.82649	1.02558	1.19546
siRNA	BioRep	mCherry (intensity / area)	YFP (intensity / area)	CFP (intensity / area)	mCherry (intensity / area)	YFP (intensity / area)	CFP (intensity / area)	mCherry (intensity / area)	YFP (intensity / area)	CFP (intensity / area)	mCherry (intensity / area)	YFP (intensity / area)	CFP (intensity / area)	M1 / Y1	M2 / Y2	C1 / Y1	C2 / Y2	C1 / M1	C2 / M2	M1 / CTRL	M2 / CTRL	C1 / CTRL	C2 / CTRL	C1/M1 CTRL	C2/M2 CTRL	M p-value	C p-value	C/M p-value	M % diff	C % diff	C/M % diff
CTRL	1	619.645	238.71	193.126	594.941	259.692	214.282	71.828	250.364	46.763	74.998	333.351	49.751	2.28827	2.00826	0.606883	0.639315	0.265215	0.318343	1.06517	0.934829	0.973975	1.02602	0.908958	1.09104	0.261379	0.966529	0.519899	-17.5608	1.39413	13.4353
CTRL	2	424.564	242.075	226.266	454.069	235.136	256.618	149.968	141.127	79.704	133.899	123.729	75.96	1.16753	1.32747	0.613174	0.760351	0.525187	0.572783	0.935898	1.0641	0.892847	1.10715	0.956651	1.04335
CANX	1	1829.97	911.316	767.979	1941.08	756.992	878.164	58.458	247.078	43.54	55.597	217.007	41.494	1.94548	2.48886	0.79606	1.1039	0.409185	0.443537	0.905606	1.15855	1.27758	1.77164	1.40238	1.52011
CANX	2	422.902	351.569	223.682	310.511	311.874	154.681	114.979	230.116	76.042	103.122	184.816	69.708	0.892717	0.645968	0.428954	0.262305	0.480504	0.406065	0.715604	0.51781	0.624603	0.381944	0.875259	0.739664
siRNA	BioRep	mCherry (intensity / area)	YFP (intensity / area)	CFP (intensity / area)	mCherry (intensity / area)	YFP (intensity / area)	CFP (intensity / area)	mCherry (intensity / area)	YFP (intensity / area)	CFP (intensity / area)	mCherry (intensity / area)	YFP (intensity / area)	CFP (intensity / area)	M1 / Y1	M2 / Y2	C1 / Y1	C2 / Y2	C1 / M1	C2 / M2	M1 / CTRL	M2 / CTRL	C1 / CTRL	C2 / CTRL	C1/M1 CTRL	C2/M2 CTRL	M p-value	C p-value	C/M p-value	M % diff	C % diff	C/M % diff
CTRL	1	619.645	238.71	193.126	594.941	259.692	214.282	71.828	250.364	46.763	74.998	333.351	49.751	2.28827	2.00826	0.606883	0.639315	0.265215	0.318343	1.06517	0.934829	0.973975	1.02602	0.908958	1.09104	0.0563376	0.0372227	0.124742	-21.104	-27.551	-9.22898
CTRL	2	424.564	242.075	226.266	454.069	235.136	256.618	149.968	141.127	79.704	133.899	123.729	75.96	1.16753	1.32747	0.613174	0.760351	0.525187	0.572783	0.935898	1.0641	0.892847	1.10715	0.956651	1.04335
ETFB	1	222.435	143.584	87.223	320.248	144.245	120.629	46.9	107.665	34.533	59.319	163.386	59.433	1.17928	1.85198	0.280254	0.510562	0.237649	0.275685	0.548946	0.862082	0.449775	0.819391	0.814481	0.94484
ETFB	2	508.219	340.901	271.876	636.48	491.984	333.528	113.511	93.69	70.122	131.298	103.697	73.596	1.13175	1.0449	0.58673	0.531865	0.518428	0.509009	0.907214	0.837597	0.854343	0.774452	0.944338	0.927181
siRNA	BioRep	mCherry (intensity / area)	YFP (intensity / area)	CFP (intensity / area)	mCherry (intensity / area)	YFP (intensity / area)	CFP (intensity / area)	mCherry (intensity / area)	YFP (intensity / area)	CFP (intensity / area)	mCherry (intensity / area)	YFP (intensity / area)	CFP (intensity / area)	M1 / Y1	M2 / Y2	C1 / Y1	C2 / Y2	C1 / M1	C2 / M2	M1 / CTRL	M2 / CTRL	C1 / CTRL	C2 / CTRL	C1/M1 CTRL	C2/M2 CTRL	M p-value	C p-value	C/M p-value	M % diff	C % diff	C/M % diff
CTRL	1	619.645	238.71	193.126	594.941	259.692	214.282	71.828	250.364	46.763	74.998	333.351	49.751	2.28827	2.00826	0.606883	0.639315	0.265215	0.318343	1.06517	0.934829	0.973975	1.02602	0.908958	1.09104	0.00652349	0.0197902	0.124777	-22.4816	-36.0477	-19.1487
CTRL	2	424.564	242.075	226.266	454.069	235.136	256.618	149.968	141.127	79.704	133.899	123.729	75.96	1.16753	1.32747	0.613174	0.760351	0.525187	0.572783	0.935898	1.0641	0.892847	1.10715	0.956651	1.04335
MRPL1	1	459.257	227.595	163.303	332.086	159.933	109.549	53.286	201.115	40.688	50.25	168.55	38.821	1.79041	1.75272	0.542844	0.436398	0.303195	0.248983	0.833424	0.815879	0.8712	0.700368	1.03912	0.853328
MRPL1	2	625.824	534.344	294.471	283.816	230.464	124.499	94.438	96.824	66.763	96.217	127.177	66.492	0.9928	0.817865	0.426399	0.251109	0.429491	0.307029	0.795831	0.655603	0.620882	0.365641	0.782336	0.559267
siRNA	BioRep	mCherry (intensity / area)	YFP (intensity / area)	CFP (intensity / area)	mCherry (intensity / area)	YFP (intensity / area)	CFP (intensity / area)	mCherry (intensity / area)	YFP (intensity / area)	CFP (intensity / area)	mCherry (intensity / area)	YFP (intensity / area)	CFP (intensity / area)	M1 / Y1	M2 / Y2	C1 / Y1	C2 / Y2	C1 / M1	C2 / M2	M1 / CTRL	M2 / CTRL	C1 / CTRL	C2 / CTRL	C1/M1 CTRL	C2/M2 CTRL	M p-value	C p-value	C/M p-value	M % diff	C % diff	C/M % diff
CTRL	1	619.645	238.71	193.126	594.941	259.692	214.282	71.828	250.364	46.763	74.998	333.351	49.751	2.28827	2.00826	0.606883	0.639315	0.265215	0.318343	1.06517	0.934829	0.973975	1.02602	0.908958	1.09104	#DIV/0!	#DIV/0!	#DIV/0!	#DIV/0!	#DIV/0!	#DIV/0!
CTRL	2	424.564	242.075	226.266	454.069	235.136	256.618	149.968	141.127	79.704	133.899	123.729	75.96	1.16753	1.32747	0.613174	0.760351	0.525187	0.572783	0.935898	1.0641	0.892847	1.10715	0.956651	1.04335
CKAP5	1	58.473	55.123	39.186	110.97	74.45	63.235	47.472	44.715	35.578	46.72	41.197	35.15	0.206393	0.857945	0.0693358	0.374359	0.335941	0.436343
CKAP5	2	148.891	93.752	94.946	99.601	80.431	68.519	105.475	96.274	73.055	98.439	82.504	68.424	0.500619	0	0.258197	0	0.515756	#DIV/0!
siRNA	BioRep	mCherry (intensity / area)	YFP (intensity / area)	CFP (intensity / area)	mCherry (intensity / area)	YFP (intensity / area)	CFP (intensity / area)	mCherry (intensity / area)	YFP (intensity / area)	CFP (intensity / area)	mCherry (intensity / area)	YFP (intensity / area)	CFP (intensity / area)	M1 / Y1	M2 / Y2	C1 / Y1	C2 / Y2	C1 / M1	C2 / M2	M1 / CTRL	M2 / CTRL	C1 / CTRL	C2 / CTRL	C1/M1 CTRL	C2/M2 CTRL	M p-value	C p-value	C/M p-value	M % diff	C % diff	C/M % diff
CTRL	1	1588.52	360.117	582.891	980.462	205.422	458.621	51.399	191.267	38.54	49.553	189.829	38.684	4.27096	4.5272	1.51139	2.04462	0.353877	0.451629	0.970876	1.02912	0.850051	1.14995	0.878645	1.12136	0.00796369	0.222672	0.00119301	-62.9838	-29.7365	103.65
CTRL	2	531.03	350.67	245.12	217.649	135.564	118.438	81.239	53.626	58.34	94.053	93.486	60.175	1.26439	0.958979	0.530021	0.43655	0.419191	0.455224	1.13736	0.862635	1.0967	0.903296	0.958792	1.04121
SRRM2	1	547.171	471.089	489.093	259.448	239.361	219.453	61.261	371.838	46.097	53.892	181.521	42.207	1.03928	0.843377	0.944495	0.732371	0.908795	0.868379	0.23625	0.191717	0.53121	0.411906	2.25646	2.15611
SRRM2	2	251.27	161.722	123.725	530.679	313.358	309.366	300.508	108.088	143.003	285.331	237.752	122.934	-0.257538	0.758747	-0.0571567	0.562926	0.221935	0.741916		0.68252		1.16479		1.69694
siRNA	BioRep	mCherry (intensity / area)	YFP (intensity / area)	CFP (intensity / area)	mCherry (intensity / area)	YFP (intensity / area)	CFP (intensity / area)	mCherry (intensity / area)	YFP (intensity / area)	CFP (intensity / area)	mCherry (intensity / area)	YFP (intensity / area)	CFP (intensity / area)	M1 / Y1	M2 / Y2	C1 / Y1	C2 / Y2	C1 / M1	C2 / M2	M1 / CTRL	M2 / CTRL	C1 / CTRL	C2 / CTRL	C1/M1 CTRL	C2/M2 CTRL	M p-value	C p-value	C/M p-value	M % diff	C % diff	C/M % diff
CTRL	1	1588.52	360.117	582.891	980.462	205.422	458.621	51.399	191.267	38.54	49.553	189.829	38.684	4.27096	4.5272	1.51139	2.04462	0.353877	0.451629	0.970876	1.02912	0.850051	1.14995	0.878645	1.12136	0.00284321	0.00500604	0.385661	-64.9925	-61.7528	13.583
CTRL	2	531.03	350.67	245.12	217.649	135.564	118.438	81.239	53.626	58.34	94.053	93.486	60.175	1.26439	0.958979	0.530021	0.43655	0.419191	0.455224	1.13736	0.862635	1.0967	0.903296	0.958792	1.04121
SRP72	1	761.5	370.146	311.056	102.346	120.181	54.46	59.235	306.372	42.908	56.95	153.127	42.467	1.90035	0.368224	0.725034	0.0979564	0.381526	0.266024	0.431988		0.40778		0.947296
SRP72	2	153.049	102.032	80.722	244.442	98.834	120.333	230.341	154.429	112.652	199.616	189.506	93.894	-0.606962	0.298111	-0.221019	0.172613	0.36414	0.579022		0.268161		0.357165		1.32436
siRNA	BioRep	mCherry (intensity / area)	YFP (intensity / area)	CFP (intensity / area)	mCherry (intensity / area)	YFP (intensity / area)	CFP (intensity / area)	mCherry (intensity / area)	YFP (intensity / area)	CFP (intensity / area)	mCherry (intensity / area)	YFP (intensity / area)	CFP (intensity / area)	M1 / Y1	M2 / Y2	C1 / Y1	C2 / Y2	C1 / M1	C2 / M2	M1 / CTRL	M2 / CTRL	C1 / CTRL	C2 / CTRL	C1/M1 CTRL	C2/M2 CTRL	M p-value	C p-value	C/M p-value	M % diff	C % diff	C/M % diff
CTRL	1	1588.52	360.117	582.891	980.462	205.422	458.621	51.399	191.267	38.54	49.553	189.829	38.684	4.27096	4.5272	1.51139	2.04462	0.353877	0.451629	0.970876	1.02912	0.850051	1.14995	0.878645	1.12136	0.0042741	0.0017853	0.311679	-68.0772	-75.0562	-12.6039
CTRL	2	531.03	350.67	245.12	217.649	135.564	118.438	81.239	53.626	58.34	94.053	93.486	60.175	1.26439	0.958979	0.530021	0.43655	0.419191	0.455224	1.13736	0.862635	1.0967	0.903296	0.958792	1.04121
UPF1	1	227.211	107.827	83.908	405.399	154.254	151.733	51.937	182.673	39.886	54.836	230.574	39.786	1.61207	2.28203	0.408729	0.725407	0.253543	0.317878		0.518752		0.407989		0.789262
UPF1	2	156.987	87.717	89.121	188.137	107.654	97.228	161.106	230.097	93.004	120.23	144.397	70.842	0.186041	0.44094	0.0820593	0.142168	0.441081	0.322421	0.042291	0.396642	0.0461525	0.294171	1.09516	0.737455
siRNA	BioRep	mCherry (intensity / area)	YFP (intensity / area)	CFP (intensity / area)	mCherry (intensity / area)	YFP (intensity / area)	CFP (intensity / area)	mCherry (intensity / area)	YFP (intensity / area)	CFP (intensity / area)	mCherry (intensity / area)	YFP (intensity / area)	CFP (intensity / area)	M1 / Y1	M2 / Y2	C1 / Y1	C2 / Y2	C1 / M1	C2 / M2	M1 / CTRL	M2 / CTRL	C1 / CTRL	C2 / CTRL	C1/M1 CTRL	C2/M2 CTRL	M p-value	C p-value	C/M p-value	M % diff	C % diff	C/M % diff
CTRL	1	1588.52	360.117	582.891	980.462	205.422	458.621	51.399	191.267	38.54	49.553	189.829	38.684	4.27096	4.5272	1.51139	2.04462	0.353877	0.451629	0.970876	1.02912	0.850051	1.14995	0.878645	1.12136	0.221297	0.199698	0.465872	-32.3917	-32.0283	13.513
CTRL	2	531.03	350.67	245.12	217.649	135.564	118.438	81.239	53.626	58.34	94.053	93.486	60.175	1.26439	0.958979	0.530021	0.43655	0.419191	0.455224	1.13736	0.862635	1.0967	0.903296	0.958792	1.04121
VAPA	1	350.915	109.491	132.126	774.765	159.254	265.115	56.341	134.122	40.224	52.409	172.136	40.354	2.70835	4.52353	0.838763	1.41174	0.309695	0.312089		1.02829		0.794005		0.77489
VAPA	2	141.097	77.194	90.38	162.258	79.425	99.056	91.647	60.431	60.03	83.991	79.18	59.591	0.690183	0.937224	0.396009	0.49412	0.573773	0.527217	0.156893	0.843066	0.222726	1.02242	1.42463	1.20587
siRNA	BioRep	mCherry (intensity / area)	YFP (intensity / area)	CFP (intensity / area)	mCherry (intensity / area)	YFP (intensity / area)	CFP (intensity / area)	mCherry (intensity / area)	YFP (intensity / area)	CFP (intensity / area)	mCherry (intensity / area)	YFP (intensity / area)	CFP (intensity / area)	M1 / Y1	M2 / Y2	C1 / Y1	C2 / Y2	C1 / M1	C2 / M2	M1 / CTRL	M2 / CTRL	C1 / CTRL	C2 / CTRL	C1/M1 CTRL	C2/M2 CTRL	M p-value	C p-value	C/M p-value	M % diff	C % diff	C/M % diff
CTRL	1	1588.52	360.117	582.891	980.462	205.422	458.621	51.399	191.267	38.54	49.553	189.829	38.684	4.27096	4.5272	1.51139	2.04462	0.353877	0.451629	0.970876	1.02912	0.850051	1.14995	0.878645	1.12136	0.00260249	0.243436	0.00333613	-38.4056	14.9006	87.4954
CTRL	2	531.03	350.67	245.12	217.649	135.564	118.438	81.239	53.626	58.34	94.053	93.486	60.175	1.26439	0.958979	0.530021	0.43655	0.419191	0.455224	1.13736	0.862635	1.0967	0.903296	0.958792	1.04121
SRSF6	1	519.087	163.923	336.238	668.301	220.408	494.445	59.27	180.792	45.829	60.98	144.602	43.982	2.79986	2.75932	1.77725	2.03958	0.634764	0.73916	0.636466	0.627249	0.999576	1.14712	1.57606	1.83527
SRSF6	2	282.601	159.705	164.71	359.339	160.821	215.227	245.684	91.367	100.858	264.134	199.525	127.467	0.173395	0.649355	0.316505	0.628429	1.82535	0.967773		0.584118		1.30033		2.21353
siRNA	BioRep	mCherry (intensity / area)	YFP (intensity / area)	CFP (intensity / area)	mCherry (intensity / area)	YFP (intensity / area)	CFP (intensity / area)	mCherry (intensity / area)	YFP (intensity / area)	CFP (intensity / area)	mCherry (intensity / area)	YFP (intensity / area)	CFP (intensity / area)	M1 / Y1	M2 / Y2	C1 / Y1	C2 / Y2	C1 / M1	C2 / M2	M1 / CTRL	M2 / CTRL	C1 / CTRL	C2 / CTRL	C1/M1 CTRL	C2/M2 CTRL	M p-value	C p-value	C/M p-value	M % diff	C % diff	C/M % diff
CTRL	1	1588.52	360.117	582.891	980.462	205.422	458.621	51.399	191.267	38.54	49.553	189.829	38.684	4.27096	4.5272	1.51139	2.04462	0.353877	0.451629	0.970876	1.02912	0.850051	1.14995	0.878645	1.12136	0.00508395	6.63227e-05	0.0015356	-50.6466	-77.9006	-51.2217
CTRL	2	531.03	350.67	245.12	217.649	135.564	118.438	81.239	53.626	58.34	94.053	93.486	60.175	1.26439	0.958979	0.530021	0.43655	0.419191	0.455224	1.13736	0.862635	1.0967	0.903296	0.958792	1.04121
YTHDC1	1	497.227	178.232	98.592	1490.68	445.68	282.581	60.809	322.086	44.239	59.122	99.842	40.509	2.45333	3.21019	0.31542	0.538967	0.128568	0.167892	0.557691	0.729742	0.177401	0.30313	0.319224	0.416862
YTHDC1	2	201.78	93.987	95.681	155.837	105.934	81.177	96.45	73.959	68.098	109.71	193.34	69.437	1.05015	0.498018	0.286353	0.117144	0.27268	0.23522	0.238719	0.447985	0.161053	0.24239	0.67704	0.538005
siRNA	BioRep	mCherry (intensity / area)	YFP (intensity / area)	CFP (intensity / area)	mCherry (intensity / area)	YFP (intensity / area)	CFP (intensity / area)	mCherry (intensity / area)	YFP (intensity / area)	CFP (intensity / area)	mCherry (intensity / area)	YFP (intensity / area)	CFP (intensity / area)	M1 / Y1	M2 / Y2	C1 / Y1	C2 / Y2	C1 / M1	C2 / M2	M1 / CTRL	M2 / CTRL	C1 / CTRL	C2 / CTRL	C1/M1 CTRL	C2/M2 CTRL	M p-value	C p-value	C/M p-value	M % diff	C % diff	C/M % diff
CTRL	1	1588.52	360.117	582.891	980.462	205.422	458.621	51.399	191.267	38.54	49.553	189.829	38.684	4.27096	4.5272	1.51139	2.04462	0.353877	0.451629	0.970876	1.02912	0.850051	1.14995	0.878645	1.12136	0.0267402	0.14518	0.0232647	-39.8333	-24.2523	31.3716
CTRL	2	531.03	350.67	245.12	217.649	135.564	118.438	81.239	53.626	58.34	94.053	93.486	60.175	1.26439	0.958979	0.530021	0.43655	0.419191	0.455224	1.13736	0.862635	1.0967	0.903296	0.958792	1.04121
DDX3X	1	914.526	311.978	476.094	1101.62	344.872	591.467	64.702	255.502	48.076	62.274	347.89	46.586	2.72788	3.01019	1.37434	1.57779	0.503812	0.52415	0.620102	0.684278	0.772966	0.887394	1.25092	1.30142
DDX3X	2	487.085	266.999	281.341	650.906	497.061	323.322	91.334	72.89	65.896	277.205	180.345	115.63	1.13414	0.938791	0.713778	0.467868	0.629354	0.498373	0.257814	0.844476	0.401449	0.968098	1.56263	1.1399
siRNA	BioRep	mCherry (intensity / area)	YFP (intensity / area)	CFP (intensity / area)	mCherry (intensity / area)	YFP (intensity / area)	CFP (intensity / area)	mCherry (intensity / area)	YFP (intensity / area)	CFP (intensity / area)	mCherry (intensity / area)	YFP (intensity / area)	CFP (intensity / area)	M1 / Y1	M2 / Y2	C1 / Y1	C2 / Y2	C1 / M1	C2 / M2	M1 / CTRL	M2 / CTRL	C1 / CTRL	C2 / CTRL	C1/M1 CTRL	C2/M2 CTRL	M p-value	C p-value	C/M p-value	M % diff	C % diff	C/M % diff
CTRL	1	1588.52	360.117	582.891	980.462	205.422	458.621	51.399	191.267	38.54	49.553	189.829	38.684	4.27096	4.5272	1.51139	2.04462	0.353877	0.451629	0.970876	1.02912	0.850051	1.14995	0.878645	1.12136	0.0163147	0.00267053	0.132263	-44.6974	-56.961	-17.7356
CTRL	2	531.03	350.67	245.12	217.649	135.564	118.438	81.239	53.626	58.34	94.053	93.486	60.175	1.26439	0.958979	0.530021	0.43655	0.419191	0.455224	1.13736	0.862635	1.0967	0.903296	0.958792	1.04121
STAU2	1	790.776	265.241	246.86	717.872	239.654	226.766	55.702	251.678	42.678	54.027	299.569	42.351	2.7745	2.76652	0.770414	0.768823	0.277677	0.277903	0.6307	0.628886	0.433303	0.432408	0.689446	0.690007
STAU2	2	232.181	100.902	111.577	247.085	121.511	112.508	107.086	61.893	65.357	182.835	107.249	83.47	0.864408	0.840455	0.368313	0.313507	0.426087	0.37302	0.196497	0.756019	0.207149	0.648698	1.05794	0.853188
siRNA	BioRep	mCherry (intensity / area)	YFP (intensity / area)	CFP (intensity / area)	mCherry (intensity / area)	YFP (intensity / area)	CFP (intensity / area)	mCherry (intensity / area)	YFP (intensity / area)	CFP (intensity / area)	mCherry (intensity / area)	YFP (intensity / area)	CFP (intensity / area)	M1 / Y1	M2 / Y2	C1 / Y1	C2 / Y2	C1 / M1	C2 / M2	M1 / CTRL	M2 / CTRL	C1 / CTRL	C2 / CTRL	C1/M1 CTRL	C2/M2 CTRL	M p-value	C p-value	C/M p-value	M % diff	C % diff	C/M % diff
CTRL	1	1588.52	360.117	582.891	980.462	205.422	458.621	51.399	191.267	38.54	49.553	189.829	38.684	4.27096	4.5272	1.51139	2.04462	0.353877	0.451629	0.970876	1.02912	0.850051	1.14995	0.878645	1.12136	0.00213766	0.00466495	0.49774	-55.4057	-51.3226	18.2144
CTRL	2	531.03	350.67	245.12	217.649	135.564	118.438	81.239	53.626	58.34	94.053	93.486	60.175	1.26439	0.958979	0.530021	0.43655	0.419191	0.455224	1.13736	0.862635	1.0967	0.903296	0.958792	1.04121
YTHDC2	1	671.336	281.804	217.765	667.432	207.492	258.495	56.325	222.552	42.171	55.87	236.525	40.281	2.18321	2.9463	0.62646	1.04712	0.286944	0.355401	0.496289	0.669755	0.352339	0.58893	0.712456	0.882429
YTHDC2	2	259.81	127.665	148.44	167.061	98.105	110.196	113.812	157.732	78.029	137.645	104.679	76.681	1.05026	0.421309	0.556809	0.334754	0.530163	0.794556	0.238745	0.378982	0.313165	0.692662	1.31635	1.81734
siRNA	BioRep	mCherry (intensity / area)	YFP (intensity / area)	CFP (intensity / area)	mCherry (intensity / area)	YFP (intensity / area)	CFP (intensity / area)	mCherry (intensity / area)	YFP (intensity / area)	CFP (intensity / area)	mCherry (intensity / area)	YFP (intensity / area)	CFP (intensity / area)	M1 / Y1	M2 / Y2	C1 / Y1	C2 / Y2	C1 / M1	C2 / M2	M1 / CTRL	M2 / CTRL	C1 / CTRL	C2 / CTRL	C1/M1 CTRL	C2/M2 CTRL	M p-value	C p-value	C/M p-value	M % diff	C % diff	C/M % diff
CTRL	1	1588.52	360.117	582.891	980.462	205.422	458.621	51.399	191.267	38.54	49.553	189.829	38.684	4.27096	4.5272	1.51139	2.04462	0.353877	0.451629	0.970876	1.02912	0.850051	1.14995	0.878645	1.12136	0.0129247	0.0047089	0.291498	-37.5079	-47.2108	-12.996
CTRL	2	531.03	350.67	245.12	217.649	135.564	118.438	81.239	53.626	58.34	94.053	93.486	60.175	1.26439	0.958979	0.530021	0.43655	0.419191	0.455224	1.13736	0.862635	1.0967	0.903296	0.958792	1.04121
SBNO1	1	500.524	152.372	168.927	722.944	197.746	268.816	67.357	262.568	48.106	58.114	200.662	43.369	2.87316	3.33867	0.808479	1.12811	0.28139	0.337891	0.653127	0.758947	0.454711	0.634479	0.698667	0.838953
SBNO1	2	413.745	147.614	204.168	278.512	85.886	165.436	91.581	79.548	63.831	135	135	84.941	2.03541	1.92373	0.879198	1.06013	0.431952	0.551078	0.462689		0.494486		1.0725
siRNA	BioRep	mCherry (intensity / area)	YFP (intensity / area)	CFP (intensity / area)	mCherry (intensity / area)	YFP (intensity / area)	CFP (intensity / area)	mCherry (intensity / area)	YFP (intensity / area)	CFP (intensity / area)	mCherry (intensity / area)	YFP (intensity / area)	CFP (intensity / area)	M1 / Y1	M2 / Y2	C1 / Y1	C2 / Y2	C1 / M1	C2 / M2	M1 / CTRL	M2 / CTRL	C1 / CTRL	C2 / CTRL	C1/M1 CTRL	C2/M2 CTRL	M p-value	C p-value	C/M p-value	M % diff	C % diff	C/M % diff
CTRL	1	1588.52	360.117	582.891	980.462	205.422	458.621	51.399	191.267	38.54	49.553	189.829	38.684	4.27096	4.5272	1.51139	2.04462	0.353877	0.451629	0.970876	1.02912	0.850051	1.14995	0.878645	1.12136	0.406323	0.21743	0.525728	-21.65	-29.3948	36.6004
CTRL	2	531.03	350.67	245.12	217.649	135.564	118.438	81.239	53.626	58.34	94.053	93.486	60.175	1.26439	0.958979	0.530021	0.43655	0.419191	0.455224	1.13736	0.862635	1.0967	0.903296	0.958792	1.04121
TNPO1	1	1159.08	265.108	340.178	1254.11	269.492	391.953	56.688	213.324	42.409	55.849	151.606	42.379	4.15986	4.44482	1.12326	1.2971	0.270022	0.291823	0.945621	1.0104	0.63175	0.729527	0.670441	0.724571
TNPO1	2	148.474	77.787	100.208	240.484	98.799	124.651	136.393	71.363	68.454	103.973	140.369	64.451	0.363698	1.21763	0.433948	0.58906	1.19315	0.483774	0.082676	1.0953	0.244064	1.21886	2.96249	1.10651
siRNA	BioRep	mCherry (intensity / area)	YFP (intensity / area)	CFP (intensity / area)	mCherry (intensity / area)	YFP (intensity / area)	CFP (intensity / area)	mCherry (intensity / area)	YFP (intensity / area)	CFP (intensity / area)	mCherry (intensity / area)	YFP (intensity / area)	CFP (intensity / area)	M1 / Y1	M2 / Y2	C1 / Y1	C2 / Y2	C1 / M1	C2 / M2	M1 / CTRL	M2 / CTRL	C1 / CTRL	C2 / CTRL	C1/M1 CTRL	C2/M2 CTRL	M p-value	C p-value	C/M p-value	M % diff	C % diff	C/M % diff
CTRL	1	1588.52	360.117	582.891	980.462	205.422	458.621	51.399	191.267	38.54	49.553	189.829	38.684	4.27096	4.5272	1.51139	2.04462	0.353877	0.451629	0.970876	1.02912	0.850051	1.14995	0.878645	1.12136	0.0211835	0.0204916	0.457158	-46.078	-44.6773	5.97226
CTRL	2	531.03	350.67	245.12	217.649	135.564	118.438	81.239	53.626	58.34	94.053	93.486	60.175	1.26439	0.958979	0.530021	0.43655	0.419191	0.455224	1.13736	0.862635	1.0967	0.903296	0.958792	1.04121
YTHDF1	1	1126.87	438.884	517.423	672.968	238.302	318.976	57.081	333.898	45.59	55.056	330.239	41.733	2.43983	2.58873	1.07947	1.15532	0.442437	0.446287	0.554622	0.588471	0.607123	0.649783	1.09853	1.10809
YTHDF1	2	380.909	323.946	194.906	296.489	175.538	146.04	122.109	159.001	81.048	143.193	145.602	82.198	0.766356	0.933348	0.349697	0.366969	0.456312	0.393175	0.174208	0.839579	0.196679	0.759321	1.13298	0.899287
siRNA	BioRep	mCherry (intensity / area)	YFP (intensity / area)	CFP (intensity / area)	mCherry (intensity / area)	YFP (intensity / area)	CFP (intensity / area)	mCherry (intensity / area)	YFP (intensity / area)	CFP (intensity / area)	mCherry (intensity / area)	YFP (intensity / area)	CFP (intensity / area)	M1 / Y1	M2 / Y2	C1 / Y1	C2 / Y2	C1 / M1	C2 / M2	M1 / CTRL	M2 / CTRL	C1 / CTRL	C2 / CTRL	C1/M1 CTRL	C2/M2 CTRL	M p-value	C p-value	C/M p-value	M % diff	C % diff	C/M % diff
CTRL	1	1588.52	360.117	582.891	980.462	205.422	458.621	51.399	191.267	38.54	49.553	189.829	38.684	4.27096	4.5272	1.51139	2.04462	0.353877	0.451629	0.970876	1.02912	0.850051	1.14995	0.878645	1.12136	0.0705926	0.0497869	0.0792221	-37.0988	-45.0025	-15.7252
CTRL	2	531.03	350.67	245.12	217.649	135.564	118.438	81.239	53.626	58.34	94.053	93.486	60.175	1.26439	0.958979	0.530021	0.43655	0.419191	0.455224	1.13736	0.862635	1.0967	0.903296	0.958792	1.04121
SCCPDH	1	1358.72	475.915	436.389	1511.89	477.901	542.887	60.311	387.007	44.673	59.367	354.424	45.226	2.72924	3.03839	0.822499	1.04193	0.301366	0.342921	0.620411	0.690687	0.462596	0.586008	0.748264	0.851441
SCCPDH	2	172.432	88.276	88.689	267.346	162.841	139.499	94.436	62.91	66.547	82.35	91.302	57.82	0.952003	1.09894	0.300257	0.474791	0.315395	0.432044	0.21641	0.988538	0.168873	0.982424	0.783098	0.988189
siRNA	BioRep	mCherry (intensity / area)	YFP (intensity / area)	CFP (intensity / area)	mCherry (intensity / area)	YFP (intensity / area)	CFP (intensity / area)	mCherry (intensity / area)	YFP (intensity / area)	CFP (intensity / area)	mCherry (intensity / area)	YFP (intensity / area)	CFP (intensity / area)	M1 / Y1	M2 / Y2	C1 / Y1	C2 / Y2	C1 / M1	C2 / M2	M1 / CTRL	M2 / CTRL	C1 / CTRL	C2 / CTRL	C1/M1 CTRL	C2/M2 CTRL	M p-value	C p-value	C/M p-value	M % diff	C % diff	C/M % diff
CTRL	1	1588.52	360.117	582.891	980.462	205.422	458.621	51.399	191.267	38.54	49.553	189.829	38.684	4.27096	4.5272	1.51139	2.04462	0.353877	0.451629	0.970876	1.02912	0.850051	1.14995	0.878645	1.12136	0.0858791	0.257008	0.766999	-36.6118	-30.7585	3.26943
CTRL	2	531.03	350.67	245.12	217.649	135.564	118.438	81.239	53.626	58.34	94.053	93.486	60.175	1.26439	0.958979	0.530021	0.43655	0.419191	0.455224	1.13736	0.862635	1.0967	0.903296	0.958792	1.04121
TOP1	1	847.677	265.726	350.92	866.212	266.972	355.446	59.261	263.217	44.817	56.82	193.597	43.433	2.97162	3.02718	1.15455	1.16612	0.388527	0.385217	0.675509	0.688139	0.649354	0.655858	0.964677	0.956458
TOP1	2	222.868	92.923	105.033	280.273	117.788	152.741	124.326	68.116	70.713	175.924	158.301	86.315	0.782831	1.10493	0.285387	0.630175	0.364557	0.570328	0.177953	0.993928	0.16051	1.30394	0.905163	1.30448
siRNA	BioRep	mCherry (intensity / area)	YFP (intensity / area)	CFP (intensity / area)	mCherry (intensity / area)	YFP (intensity / area)	CFP (intensity / area)	mCherry (intensity / area)	YFP (intensity / area)	CFP (intensity / area)	mCherry (intensity / area)	YFP (intensity / area)	CFP (intensity / area)	M1 / Y1	M2 / Y2	C1 / Y1	C2 / Y2	C1 / M1	C2 / M2	M1 / CTRL	M2 / CTRL	C1 / CTRL	C2 / CTRL	C1/M1 CTRL	C2/M2 CTRL	M p-value	C p-value	C/M p-value	M % diff	C % diff	C/M % diff
CTRL	1	1588.52	360.117	582.891	980.462	205.422	458.621	51.399	191.267	38.54	49.553	189.829	38.684	4.27096	4.5272	1.51139	2.04462	0.353877	0.451629	0.970876	1.02912	0.850051	1.14995	0.878645	1.12136	0.0011751	0.00324035	0.340043	-51.6436	-43.4929	23.6152
CTRL	2	531.03	350.67	245.12	217.649	135.564	118.438	81.239	53.626	58.34	94.053	93.486	60.175	1.26439	0.958979	0.530021	0.43655	0.419191	0.455224	1.13736	0.862635	1.0967	0.903296	0.958792	1.04121
YTHDF2	1	770.559	260.075	331.336	689.366	254.313	309.969	52.301	131.146	41.418	53.633	151.544	41.224	2.75917	2.50242	1.11512	1.05637	0.40415	0.422138	0.627216	0.568852	0.627175	0.594131	1.00347	1.04813
YTHDF2	2	507.879	218.393	230.168	152.971	87.336	102.336	127.572	134.891	84.193	113.334	128.583	66.437	1.77399	0.372332	0.709057	0.309391	0.399697	0.830955	0.403263	0.334926	0.398793	0.640183	0.992412	1.9006
siRNA	BioRep	mCherry (intensity / area)	YFP (intensity / area)	CFP (intensity / area)	mCherry (intensity / area)	YFP (intensity / area)	CFP (intensity / area)	mCherry (intensity / area)	YFP (intensity / area)	CFP (intensity / area)	mCherry (intensity / area)	YFP (intensity / area)	CFP (intensity / area)	M1 / Y1	M2 / Y2	C1 / Y1	C2 / Y2	C1 / M1	C2 / M2	M1 / CTRL	M2 / CTRL	C1 / CTRL	C2 / CTRL	C1/M1 CTRL	C2/M2 CTRL	M p-value	C p-value	C/M p-value	M % diff	C % diff	C/M % diff
CTRL	1	1588.52	360.117	582.891	980.462	205.422	458.621	51.399	191.267	38.54	49.553	189.829	38.684	4.27096	4.5272	1.51139	2.04462	0.353877	0.451629	0.970876	1.02912	0.850051	1.14995	0.878645	1.12136	0.00135046	0.00655333	0.147984	-71.6172	-61.8076	50.8471
CTRL	2	531.03	350.67	245.12	217.649	135.564	118.438	81.239	53.626	58.34	94.053	93.486	60.175	1.26439	0.958979	0.530021	0.43655	0.419191	0.455224	1.13736	0.862635	1.0967	0.903296	0.958792	1.04121
SF3B2	1	165.121	246.049	134.056	278.538	248.448	215.333				55.582	196.708	42.072	0.445192	0.897395	0.373844	0.697373	0.839737	0.777108	0.101201	0.203996	0.21026	0.392222	2.08499	1.92949
SF3B2	2	176.911	88.286	92.718	300.016	300.915	175.558	89.275	69.585	64.971	98.444	90.15	66.779	0.94071	0.685099	0.304046	0.364498	0.323209	0.532038	0.213842	0.616271	0.171004	0.754209	0.802499	1.2169
siRNA	BioRep	mCherry (intensity / area)	YFP (intensity / area)	CFP (intensity / area)	mCherry (intensity / area)	YFP (intensity / area)	CFP (intensity / area)	mCherry (intensity / area)	YFP (intensity / area)	CFP (intensity / area)	mCherry (intensity / area)	YFP (intensity / area)	CFP (intensity / area)	M1 / Y1	M2 / Y2	C1 / Y1	C2 / Y2	C1 / M1	C2 / M2	M1 / CTRL	M2 / CTRL	C1 / CTRL	C2 / CTRL	C1/M1 CTRL	C2/M2 CTRL	M p-value	C p-value	C/M p-value	M % diff	C % diff	C/M % diff
CTRL	1	1588.52	360.117	582.891	980.462	205.422	458.621	51.399	191.267	38.54	49.553	189.829	38.684	4.27096	4.5272	1.51139	2.04462	0.353877	0.451629	0.970876	1.02912	0.850051	1.14995	0.878645	1.12136	0.0181979	0.00196695	0.787604	-50.611	-58.6157	-4.20526
CTRL	2	531.03	350.67	245.12	217.649	135.564	118.438	81.239	53.626	58.34	94.053	93.486	60.175	1.26439	0.958979	0.530021	0.43655	0.419191	0.455224	1.13736	0.862635	1.0967	0.903296	0.958792	1.04121
TRA2A	1	559.037	227.66	253.337	657.868	277.698	286.276	51.833	202.134	40.516	57.036	290.69	44.555	2.21647	2.17298	0.925949	0.877718	0.417758	0.403923	0.503849	0.493963	0.52078	0.493653	1.03725	1.0029
TRA2A	2	171.805	123.401	101.854	231.486	138.322	99.172	101.555	80.248	68.056	100.747	111.382	65.86	0.572556	0.942258	0.282785	0.232891	0.4939	0.247163	0.130154	0.847594	0.159046	0.481892	1.22631	0.565322
siRNA	BioRep	mCherry (intensity / area)	YFP (intensity / area)	CFP (intensity / area)	mCherry (intensity / area)	YFP (intensity / area)	CFP (intensity / area)	mCherry (intensity / area)	YFP (intensity / area)	CFP (intensity / area)	mCherry (intensity / area)	YFP (intensity / area)	CFP (intensity / area)	M1 / Y1	M2 / Y2	C1 / Y1	C2 / Y2	C1 / M1	C2 / M2	M1 / CTRL	M2 / CTRL	C1 / CTRL	C2 / CTRL	C1/M1 CTRL	C2/M2 CTRL	M p-value	C p-value	C/M p-value	M % diff	C % diff	C/M % diff
CTRL	1	1588.52	360.117	582.891	980.462	205.422	458.621	51.399	191.267	38.54	49.553	189.829	38.684	4.27096	4.5272	1.51139	2.04462	0.353877	0.451629	0.970876	1.02912	0.850051	1.14995	0.878645	1.12136	0.000182977	5.82213e-05	0.620462	-72.8345	-74.3146	15.6288
CTRL	2	531.03	350.67	245.12	217.649	135.564	118.438	81.239	53.626	58.34	94.053	93.486	60.175	1.26439	0.958979	0.530021	0.43655	0.419191	0.455224	1.13736	0.862635	1.0967	0.903296	0.958792	1.04121
YTHDF3	1	411.924	252.743	142.383	443.205	198.611	143.791	60.798	239.783	44.855	54.158	133.542	43.778	1.4024	1.94212	0.388009	0.500851	0.276675	0.257888	0.318793	0.441484	0.218227	0.281693	0.68696	0.640314
YTHDF3	2	265.785	155.476	159.017	151.319	114.725	95.4	157.812	96.804	90.501	110.647	103.068	72.833	0.846147	0.148961	0.497504	0.119704	0.587965	0.803593	0.192346	0.133995	0.27981	0.247687	1.45986	1.83801
siRNA	BioRep	mCherry (intensity / area)	YFP (intensity / area)	CFP (intensity / area)	mCherry (intensity / area)	YFP (intensity / area)	CFP (intensity / area)	mCherry (intensity / area)	YFP (intensity / area)	CFP (intensity / area)	mCherry (intensity / area)	YFP (intensity / area)	CFP (intensity / area)	M1 / Y1	M2 / Y2	C1 / Y1	C2 / Y2	C1 / M1	C2 / M2	M1 / CTRL	M2 / CTRL	C1 / CTRL	C2 / CTRL	C1/M1 CTRL	C2/M2 CTRL	M p-value	C p-value	C/M p-value	M % diff	C % diff	C/M % diff
CTRL	1	1588.52	360.117	582.891	980.462	205.422	458.621	51.399	191.267	38.54	49.553	189.829	38.684	4.27096	4.5272	1.51139	2.04462	0.353877	0.451629	0.970876	1.02912	0.850051	1.14995	0.878645	1.12136	0.805214	0.953478	0.313426	-10.5607	2.99095	10.093
CTRL	2	531.03	350.67	245.12	217.649	135.564	118.438	81.239	53.626	58.34	94.053	93.486	60.175	1.26439	0.958979	0.530021	0.43655	0.419191	0.455224	1.13736	0.862635	1.0967	0.903296	0.958792	1.04121
SON	1	207.699	110.185	106.375	158.013	97.067	78.826	52.251	78.232	39.075	57.174	124.368	43.691	1.38845	1.06422	0.589844	0.385744	0.424822	0.362467
SON	2	356.132	232.785	173.408	288.024	113.231	162.58	104.515	63.596	64.693	85.406	51.834	63.883	1.12194	1.70504	0.468759	0.868066	0.41781	0.509117	0.25504	1.53374	0.263643	1.79618	1.03738	1.16448
siRNA	BioRep	mCherry (intensity / area)	YFP (intensity / area)	CFP (intensity / area)	mCherry (intensity / area)	YFP (intensity / area)	CFP (intensity / area)	mCherry (intensity / area)	YFP (intensity / area)	CFP (intensity / area)	mCherry (intensity / area)	YFP (intensity / area)	CFP (intensity / area)	M1 / Y1	M2 / Y2	C1 / Y1	C2 / Y2	C1 / M1	C2 / M2	M1 / CTRL	M2 / CTRL	C1 / CTRL	C2 / CTRL	C1/M1 CTRL	C2/M2 CTRL	M p-value	C p-value	C/M p-value	M % diff	C % diff	C/M % diff
CTRL	1	1588.52	360.117	582.891	980.462	205.422	458.621	51.399	191.267	38.54	49.553	189.829	38.684	4.27096	4.5272	1.51139	2.04462	0.353877	0.451629	0.970876	1.02912	0.850051	1.14995	0.878645	1.12136	0.0344318	0.0315372	0.526738	-47.7416	-52.1098	-7.54457
CTRL	2	531.03	350.67	245.12	217.649	135.564	118.438	81.239	53.626	58.34	94.053	93.486	60.175	1.26439	0.958979	0.530021	0.43655	0.419191	0.455224	1.13736	0.862635	1.0967	0.903296	0.958792	1.04121
TRIM56	1	363.846	151.014	129.477	430.419	137.81	169.358	54.733	207.465	40.856	54.492	333.36	40.36	2.04771	2.72699	0.588482	0.934257	0.287385	0.342597	0.465487		0.330979		0.713551
TRIM56	2	386.058	281.781	191.596	197.603	117.245	108.16	81.889	60.483	59.047	89.179	66.838	61.653	1.06652	0.955853	0.465773	0.407779	0.436724	0.426612	0.242441	0.859824	0.261964	0.843763	1.08435	0.975766
siRNA	BioRep	mCherry (intensity / area)	YFP (intensity / area)	CFP (intensity / area)	mCherry (intensity / area)	YFP (intensity / area)	CFP (intensity / area)	mCherry (intensity / area)	YFP (intensity / area)	CFP (intensity / area)	mCherry (intensity / area)	YFP (intensity / area)	CFP (intensity / area)	M1 / Y1	M2 / Y2	C1 / Y1	C2 / Y2	C1 / M1	C2 / M2	M1 / CTRL	M2 / CTRL	C1 / CTRL	C2 / CTRL	C1/M1 CTRL	C2/M2 CTRL	M p-value	C p-value	C/M p-value	M % diff	C % diff	C/M % diff
CTRL	1	1588.52	360.117	582.891	980.462	205.422	458.621	51.399	191.267	38.54	49.553	189.829	38.684	4.27096	4.5272	1.51139	2.04462	0.353877	0.451629	0.970876	1.02912	0.850051	1.14995	0.878645	1.12136	0.000271955	0.000929904	0.509106	-58.2514	-55.1923	10.7314
CTRL	2	531.03	350.67	245.12	217.649	135.564	118.438	81.239	53.626	58.34	94.053	93.486	60.175	1.26439	0.958979	0.530021	0.43655	0.419191	0.455224	1.13736	0.862635	1.0967	0.903296	0.958792	1.04121
ZNF326	1	568.161	238.613	287.556	501.373	210.217	225.752	53.465	131.675	41.911	54.907	237.897	41.679	2.15401	2.12726	1.02996	0.875081	0.478157	0.411365	0.48965	0.48357	0.579276	0.49217	1.18722	1.02138
ZNF326	2	350.748	217.066	219.127	185.349	196.251	99.226	87.002	50.807	62.781	97.752	77.586	73.211	1.19029	0.47374	0.696244	0.159133	0.584938	0.335908	0.270577	0.426146	0.391587	0.329273	1.45235	0.768302
siRNA	BioRep	mCherry (intensity / area)	YFP (intensity / area)	CFP (intensity / area)	mCherry (intensity / area)	YFP (intensity / area)	CFP (intensity / area)	mCherry (intensity / area)	YFP (intensity / area)	CFP (intensity / area)	mCherry (intensity / area)	YFP (intensity / area)	CFP (intensity / area)	M1 / Y1	M2 / Y2	C1 / Y1	C2 / Y2	C1 / M1	C2 / M2	M1 / CTRL	M2 / CTRL	C1 / CTRL	C2 / CTRL	C1/M1 CTRL	C2/M2 CTRL	M p-value	C p-value	C/M p-value	M % diff	C % diff	C/M % diff
CTRL	1	862.496	206.315	313.318	1013.49	280.725	340.153	242.924	205.693	119.585	276.853	306.45	121.371	2.92081	2.68448	0.934687	0.782527	0.320009	0.291501	1.04216	0.957837	1.08861	0.911391	1.04662	0.953381	0.000398806	0.00387024	0.0208817	-48.8625	-61.442	-24.2925
CTRL	2	308.202	140.405	163.22	506.59	224.016	296.034	56.549	145.246	43.253	61.984	301.529	44.713	1.77298	1.99684	0.849236	1.12515	0.478988	0.563465	0.940619	1.05938	0.860255	1.13975	0.918963	1.08104
DYNC1H1	1	177.833	92.285	81.472	267.64	128.986	102.954	86.731	83.644	59.325	82.883	83.181	56.054	1.00803	1.41746	0.257707	0.350926	0.255654	0.247573		0.505759		0.408715		0.80971
DYNC1H1	2	179.539	129.243	87.546	107.421	74.704	60.677	52.223	67.226	40.361	54.965	68.115	42.244	0.974482	0.720537	0.357803	0.25935	0.367172	0.35994	0.516991		0.362445		0.704439
siRNA	BioRep	mCherry (intensity / area)	YFP (intensity / area)	CFP (intensity / area)	mCherry (intensity / area)	YFP (intensity / area)	CFP (intensity / area)	mCherry (intensity / area)	YFP (intensity / area)	CFP (intensity / area)	mCherry (intensity / area)	YFP (intensity / area)	CFP (intensity / area)	M1 / Y1	M2 / Y2	C1 / Y1	C2 / Y2	C1 / M1	C2 / M2	M1 / CTRL	M2 / CTRL	C1 / CTRL	C2 / CTRL	C1/M1 CTRL	C2/M2 CTRL	M p-value	C p-value	C/M p-value	M % diff	C % diff	C/M % diff
CTRL	1	862.496	206.315	313.318	1013.49	280.725	340.153	242.924	205.693	119.585	276.853	306.45	121.371	2.92081	2.68448	0.934687	0.782527	0.320009	0.291501	1.04216	0.957837	1.08861	0.911391	1.04662	0.953381	0.00529619	0.318665	0.423909	-25.6964	-16.3954	11.3411
CTRL	2	308.202	140.405	163.22	506.59	224.016	296.034	56.549	145.246	43.253	61.984	301.529	44.713	1.77298	1.99684	0.849236	1.12515	0.478988	0.563465	0.940619	1.05938	0.860255	1.13975	0.918963	1.08104
NCOA5	1	652.593	279.335	211.39	778.813	271.398	308.362	98.455	149.448	63.509	131.577	325.023	78.8	1.92449	2.44584	0.502033	0.874021	0.260866	0.357349	0.686669	0.872691	0.584707	1.01795	0.853186	1.16874
NCOA5	2	412.743	298.958	228.389	383.842	224.128	290.261	53.603	120.058	42.762	56.619	170.975	44.291	1.19626	1.46671	0.618356	1.10086	0.516907	0.750567	0.634652	0.778133	0.626379	1.11515	0.991714	1.44
siRNA	BioRep	mCherry (intensity / area)	YFP (intensity / area)	CFP (intensity / area)	mCherry (intensity / area)	YFP (intensity / area)	CFP (intensity / area)	mCherry (intensity / area)	YFP (intensity / area)	CFP (intensity / area)	mCherry (intensity / area)	YFP (intensity / area)	CFP (intensity / area)	M1 / Y1	M2 / Y2	C1 / Y1	C2 / Y2	C1 / M1	C2 / M2	M1 / CTRL	M2 / CTRL	C1 / CTRL	C2 / CTRL	C1/M1 CTRL	C2/M2 CTRL	M p-value	C p-value	C/M p-value	M % diff	C % diff	C/M % diff
CTRL	1	862.496	206.315	313.318	1013.49	280.725	340.153	242.924	205.693	119.585	276.853	306.45	121.371	2.92081	2.68448	0.934687	0.782527	0.320009	0.291501	1.04216	0.957837	1.08861	0.911391	1.04662	0.953381	#DIV/0!	#DIV/0!	#DIV/0!	-26.4687	-42.8735	-22.1573
CTRL	2	308.202	140.405	163.22	506.59	224.016	296.034	56.549	145.246	43.253	61.984	301.529	44.713	1.77298	1.99684	0.849236	1.12515	0.478988	0.563465	0.940619	1.05938	0.860255	1.13975	0.918963	1.08104
DDX1	1	267.09	81.518	116.827	427.388	161.6	143.348	96.553	89.847	65.341	92.166	86.336	62.828	2.11892	2.06082	0.647004	0.490492	0.305346	0.238008		0.735313		0.571265		0.778427
DDX1	2	195.46	96.219	89.902	176.945	87.286	82.973	58.943	84.823	42.24	66.763	137.626	47.068	1.37818	1.30711	0.470261	0.439005	0.341219	0.335861
siRNA	BioRep	mCherry (intensity / area)	YFP (intensity / area)	CFP (intensity / area)	mCherry (intensity / area)	YFP (intensity / area)	CFP (intensity / area)	mCherry (intensity / area)	YFP (intensity / area)	CFP (intensity / area)	mCherry (intensity / area)	YFP (intensity / area)	CFP (intensity / area)	M1 / Y1	M2 / Y2	C1 / Y1	C2 / Y2	C1 / M1	C2 / M2	M1 / CTRL	M2 / CTRL	C1 / CTRL	C2 / CTRL	C1/M1 CTRL	C2/M2 CTRL	M p-value	C p-value	C/M p-value	M % diff	C % diff	C/M % diff
CTRL	1	862.496	206.315	313.318	1013.49	280.725	340.153	242.924	205.693	119.585	276.853	306.45	121.371	2.92081	2.68448	0.934687	0.782527	0.320009	0.291501	1.04216	0.957837	1.08861	0.911391	1.04662	0.953381	0.0077628	0.142983	0.558473	-35.849	-39.4976	-14.1653
CTRL	2	308.202	140.405	163.22	506.59	224.016	296.034	56.549	145.246	43.253	61.984	301.529	44.713	1.77298	1.99684	0.849236	1.12515	0.478988	0.563465	0.940619	1.05938	0.860255	1.13975	0.918963	1.08104
NCAPG	1	890.124	391.38	286.226	878.657	320.737	293.343	350.019	317.519	175.28	432.258	365.909	254.491	1.27494	1.51999	0.182279	0.244616	0.142971	0.160932	0.454906	0.542343	0.212297	0.284899	0.4676	0.526344
NCAPG	2	402.179	219.486	298.119	301.338	173.823	170.666	65.786	295.502	45.624	52.349	110.38	40.092	1.56325	1.39378	1.16299	0.735277	0.743959	0.527543	0.82935	0.73944	1.17808	0.744817	1.42733	1.01212
siRNA	BioRep	mCherry (intensity / area)	YFP (intensity / area)	CFP (intensity / area)	mCherry (intensity / area)	YFP (intensity / area)	CFP (intensity / area)	mCherry (intensity / area)	YFP (intensity / area)	CFP (intensity / area)	mCherry (intensity / area)	YFP (intensity / area)	CFP (intensity / area)	M1 / Y1	M2 / Y2	C1 / Y1	C2 / Y2	C1 / M1	C2 / M2	M1 / CTRL	M2 / CTRL	C1 / CTRL	C2 / CTRL	C1/M1 CTRL	C2/M2 CTRL	M p-value	C p-value	C/M p-value	M % diff	C % diff	C/M % diff
CTRL	1	862.496	206.315	313.318	1013.49	280.725	340.153	242.924	205.693	119.585	276.853	306.45	121.371	2.92081	2.68448	0.934687	0.782527	0.320009	0.291501	1.04216	0.957837	1.08861	0.911391	1.04662	0.953381	0.831702	0.180201	0.000518568	4.52158	-24.7341	-27.8795
CTRL	2	308.202	140.405	163.22	506.59	224.016	296.034	56.549	145.246	43.253	61.984	301.529	44.713	1.77298	1.99684	0.849236	1.12515	0.478988	0.563465	0.940619	1.05938	0.860255	1.13975	0.918963	1.08104
GALNT2	1	378.954	120.265	126.429	371.128	128.894	130.344	149.214	153.139	84.77	112.607	79.899	65.474	2.06247	1.86368	0.426616	0.42843	0.206847	0.229883	0.735903	0.664973	0.49687	0.498982	0.676511	0.751854
GALNT2	2	662.805	219.603	275.759	839.973	313.429	342.927	64.487	216.392	50.856	53.826	141.763	42.337	2.74882	2.49121	1.04353	0.945447	0.379629	0.379514	1.45833	1.32166	1.05707	0.957714	0.728338	0.728117
siRNA	BioRep	mCherry (intensity / area)	YFP (intensity / area)	CFP (intensity / area)	mCherry (intensity / area)	YFP (intensity / area)	CFP (intensity / area)	mCherry (intensity / area)	YFP (intensity / area)	CFP (intensity / area)	mCherry (intensity / area)	YFP (intensity / area)	CFP (intensity / area)	M1 / Y1	M2 / Y2	C1 / Y1	C2 / Y2	C1 / M1	C2 / M2	M1 / CTRL	M2 / CTRL	C1 / CTRL	C2 / CTRL	C1/M1 CTRL	C2/M2 CTRL	M p-value	C p-value	C/M p-value	M % diff	C % diff	C/M % diff
CTRL	1	862.496	206.315	313.318	1013.49	280.725	340.153	242.924	205.693	119.585	276.853	306.45	121.371	2.92081	2.68448	0.934687	0.782527	0.320009	0.291501	1.04216	0.957837	1.08861	0.911391	1.04662	0.953381	0.126835	0.371123	0.951565	-22.1715	-20.1929	-0.669419
CTRL	2	308.202	140.405	163.22	506.59	224.016	296.034	56.549	145.246	43.253	61.984	301.529	44.713	1.77298	1.99684	0.849236	1.12515	0.478988	0.563465	0.940619	1.05938	0.860255	1.13975	0.918963	1.08104
PC	1	496.759	170.405	181.684	452.012	204.865	168.226	170.287	248.252	94.064	170.237	133.695	90.706	1.91601	1.3753	0.52404	0.3702	0.273506	0.269178	0.683642	0.490714	0.610337	0.431163	0.894527	0.880372
PC	2	392.703	196.817	201.821	484.296	213.316	328.496	63.799	158.643	47.295	61.327	159.635	43.226	1.6774	1.97703	0.795462	1.32777	0.474225	0.671599	0.889908	1.04887	0.805783	1.345	0.909825	1.2885
siRNA	BioRep	mCherry (intensity / area)	YFP (intensity / area)	CFP (intensity / area)	mCherry (intensity / area)	YFP (intensity / area)	CFP (intensity / area)	mCherry (intensity / area)	YFP (intensity / area)	CFP (intensity / area)	mCherry (intensity / area)	YFP (intensity / area)	CFP (intensity / area)	M1 / Y1	M2 / Y2	C1 / Y1	C2 / Y2	C1 / M1	C2 / M2	M1 / CTRL	M2 / CTRL	C1 / CTRL	C2 / CTRL	C1/M1 CTRL	C2/M2 CTRL	M p-value	C p-value	C/M p-value	M % diff	C % diff	C/M % diff
CTRL	1	862.496	206.315	313.318	1013.49	280.725	340.153	242.924	205.693	119.585	276.853	306.45	121.371	2.92081	2.68448	0.934687	0.782527	0.320009	0.291501	1.04216	0.957837	1.08861	0.911391	1.04662	0.953381	0.0739611	0.245043	0.71586	17.6871	22.2298	3.01603
CTRL	2	308.202	140.405	163.22	506.59	224.016	296.034	56.549	145.246	43.253	61.984	301.529	44.713	1.77298	1.99684	0.849236	1.12515	0.478988	0.563465	0.940619	1.05938	0.860255	1.13975	0.918963	1.08104
GANAB	1	852.357	211.606	281.06	932.824	238.215	289.498	218.458	213.912	99.506	219.138	200.847	94.413	2.99405	2.9974	0.870016	0.808255	0.290581	0.269652	1.06829	1.06949	1.01329	0.941356	0.950373	0.881921
GANAB	2	1277.86	463.552	797.732	858.198	359.126	506.031	63.196	275.685	48.091	59.317	186.41	46.212	2.62453	2.21911	1.61919	1.27777	0.616945	0.575801	1.39239	1.17731	1.6402	1.29435	1.18364	1.1047
siRNA	BioRep	mCherry (intensity / area)	YFP (intensity / area)	CFP (intensity / area)	mCherry (intensity / area)	YFP (intensity / area)	CFP (intensity / area)	mCherry (intensity / area)	YFP (intensity / area)	CFP (intensity / area)	mCherry (intensity / area)	YFP (intensity / area)	CFP (intensity / area)	M1 / Y1	M2 / Y2	C1 / Y1	C2 / Y2	C1 / M1	C2 / M2	M1 / CTRL	M2 / CTRL	C1 / CTRL	C2 / CTRL	C1/M1 CTRL	C2/M2 CTRL	M p-value	C p-value	C/M p-value	M % diff	C % diff	C/M % diff
CTRL	1	862.496	206.315	313.318	1013.49	280.725	340.153	242.924	205.693	119.585	276.853	306.45	121.371	2.92081	2.68448	0.934687	0.782527	0.320009	0.291501	1.04216	0.957837	1.08861	0.911391	1.04662	0.953381	0.0545337	0.00384096	0.0386531	-24.7821	-46.3423	-26.1947
CTRL	2	308.202	140.405	163.22	506.59	224.016	296.034	56.549	145.246	43.253	61.984	301.529	44.713	1.77298	1.99684	0.849236	1.12515	0.478988	0.563465	0.940619	1.05938	0.860255	1.13975	0.918963	1.08104
BUB3	1	313.603	121.714	122.562	239.713	100.736	91.121	115.551	118.338	66.147	131.184	120.808	70.715	1.56297	1.15495	0.444739	0.225242	0.284547	0.195023	0.557677		0.517978		0.930638
BUB3	2	716.016	458.087	252.286	879.747	460.854	335.191	57.394	146.246	44.793	66.574	291.53	47.235	1.42775	1.77445	0.45029	0.627481	0.315385	0.35362	0.757461	0.941399	0.456132	0.635622	0.605083	0.678438
siRNA	BioRep	mCherry (intensity / area)	YFP (intensity / area)	CFP (intensity / area)	mCherry (intensity / area)	YFP (intensity / area)	CFP (intensity / area)	mCherry (intensity / area)	YFP (intensity / area)	CFP (intensity / area)	mCherry (intensity / area)	YFP (intensity / area)	CFP (intensity / area)	M1 / Y1	M2 / Y2	C1 / Y1	C2 / Y2	C1 / M1	C2 / M2	M1 / CTRL	M2 / CTRL	C1 / CTRL	C2 / CTRL	C1/M1 CTRL	C2/M2 CTRL	M p-value	C p-value	C/M p-value	M % diff	C % diff	C/M % diff
CTRL	1	862.496	206.315	313.318	1013.49	280.725	340.153	242.924	205.693	119.585	276.853	306.45	121.371	2.92081	2.68448	0.934687	0.782527	0.320009	0.291501	1.04216	0.957837	1.08861	0.911391	1.04662	0.953381	0.0793087	0.0453332	0.0467849	-12.2587	-33.6871	-25.1373
CTRL	2	308.202	140.405	163.22	506.59	224.016	296.034	56.549	145.246	43.253	61.984	301.529	44.713	1.77298	1.99684	0.849236	1.12515	0.478988	0.563465	0.940619	1.05938	0.860255	1.13975	0.918963	1.08104
ACACA	1	250.202	91.199	101.124	476.455	145.38	170.009	103.344	136.315	67.014	105.61	166.73	65.635	1.59788	2.55866	0.381578	0.713196	0.238803	0.278738		0.912945		0.830643		0.911639
ACACA	2	413.254	242.14	147.233	394.521	188.429	177.728	56.753	144.622	42.353	61.866	297.412	43.98	1.46173	1.77898	0.429778	0.714123	0.294019	0.401423	0.775493	0.943801	0.435354	0.723388	0.564092	0.770151
siRNA	BioRep	mCherry (intensity / area)	YFP (intensity / area)	CFP (intensity / area)	mCherry (intensity / area)	YFP (intensity / area)	CFP (intensity / area)	mCherry (intensity / area)	YFP (intensity / area)	CFP (intensity / area)	mCherry (intensity / area)	YFP (intensity / area)	CFP (intensity / area)	M1 / Y1	M2 / Y2	C1 / Y1	C2 / Y2	C1 / M1	C2 / M2	M1 / CTRL	M2 / CTRL	C1 / CTRL	C2 / CTRL	C1/M1 CTRL	C2/M2 CTRL	M p-value	C p-value	C/M p-value	M % diff	C % diff	C/M % diff
CTRL	1	862.496	206.315	313.318	1013.49	280.725	340.153	242.924	205.693	119.585	276.853	306.45	121.371	2.92081	2.68448	0.934687	0.782527	0.320009	0.291501	1.04216	0.957837	1.08861	0.911391	1.04662	0.953381	0.0728099	0.208125	0.00824778	-15.6458	18.6783	41.1923
CTRL	2	308.202	140.405	163.22	506.59	224.016	296.034	56.549	145.246	43.253	61.984	301.529	44.713	1.77298	1.99684	0.849236	1.12515	0.478988	0.563465	0.940619	1.05938	0.860255	1.13975	0.918963	1.08104
KPNA2	1	586.931	173.845	258.139	378.474	144.757	166.89	90.642	125.808	59.811	97.343	145.15	63.638	2.83551	1.96523	1.12983	0.726497	0.398456	0.369674	1.01173	0.701207	1.31588	0.846134	1.30319	1.20905
KPNA2	2	504.783	273.865	388.895	341.595	190.365	290.56	57.068	117.773	43.284	56.656	206.821	45.289	1.63555	1.49572	1.25832	1.29369	0.769351	0.864928	0.86771	0.793524	1.27464	1.31048	1.47604	1.65941
siRNA	BioRep	mCherry (intensity / area)	YFP (intensity / area)	CFP (intensity / area)	mCherry (intensity / area)	YFP (intensity / area)	CFP (intensity / area)	mCherry (intensity / area)	YFP (intensity / area)	CFP (intensity / area)	mCherry (intensity / area)	YFP (intensity / area)	CFP (intensity / area)	M1 / Y1	M2 / Y2	C1 / Y1	C2 / Y2	C1 / M1	C2 / M2	M1 / CTRL	M2 / CTRL	C1 / CTRL	C2 / CTRL	C1/M1 CTRL	C2/M2 CTRL	M p-value	C p-value	C/M p-value	M % diff	C % diff	C/M % diff
CTRL	1	862.496	206.315	313.318	1013.49	280.725	340.153	242.924	205.693	119.585	276.853	306.45	121.371	2.92081	2.68448	0.934687	0.782527	0.320009	0.291501	1.04216	0.957837	1.08861	0.911391	1.04662	0.953381	0.00571066	0.034131	0.609124	-37.6166	-40.0363	-6.52323
CTRL	2	308.202	140.405	163.22	506.59	224.016	296.034	56.549	145.246	43.253	61.984	301.529	44.713	1.77298	1.99684	0.849236	1.12515	0.478988	0.563465	0.940619	1.05938	0.860255	1.13975	0.918963	1.08104
ATXN2L	1	382.824	190.714	142.616	513.022	187.599	209.322	147.701	216.469	89.481	209.416	227.566	107.463	1.07106	1.78286	0.231467	0.590888	0.216111	0.331426	0.382159	0.636136	0.269584	0.688194	0.70681	1.08396
ATXN2L	2	725.268	491.035	314.914	742.358	474.546	464.332	65.347	395.087	49.812	58.832	358.192	45.505	1.35057	1.43351	0.54427	0.878047	0.402992	0.612513	0.716519	0.760522	0.551331	0.889439	0.773161	1.17514
siRNA	BioRep	mCherry (intensity / area)	YFP (intensity / area)	CFP (intensity / area)	mCherry (intensity / area)	YFP (intensity / area)	CFP (intensity / area)	mCherry (intensity / area)	YFP (intensity / area)	CFP (intensity / area)	mCherry (intensity / area)	YFP (intensity / area)	CFP (intensity / area)	M1 / Y1	M2 / Y2	C1 / Y1	C2 / Y2	C1 / M1	C2 / M2	M1 / CTRL	M2 / CTRL	C1 / CTRL	C2 / CTRL	C1/M1 CTRL	C2/M2 CTRL	M p-value	C p-value	C/M p-value	M % diff	C % diff	C/M % diff
CTRL	1	862.496	206.315	313.318	1013.49	280.725	340.153	242.924	205.693	119.585	276.853	306.45	121.371	2.92081	2.68448	0.934687	0.782527	0.320009	0.291501	1.04216	0.957837	1.08861	0.911391	1.04662	0.953381	0.36265	0.0379509	0.00861197	-22.5822	-57.0651	-56.1952
CTRL	2	308.202	140.405	163.22	506.59	224.016	296.034	56.549	145.246	43.253	61.984	301.529	44.713	1.77298	1.99684	0.849236	1.12515	0.478988	0.563465	0.940619	1.05938	0.860255	1.13975	0.918963	1.08104
LARS	1	365.495	156.129	121.923	339.574	148.15	112.631	184.022	272.023	106.056	189.198	266.06	107.691	1.14575	1.03249	0.0963914	0.0388626	0.0841295	0.0376396	0.408811	0.3684	0.112265	0.0452624	0.275153	0.123104
LARS	2	454.613	166.699	180.152	369.837	159.073	155.026	57.339	126.487	42.894	53.371	127.034	41.007	2.39508	1.97697	0.829048	0.71084	0.346146	0.359561	1.27066	1.04884	0.839805	0.720063	0.664099	0.689837
siRNA	BioRep	mCherry (intensity / area)	YFP (intensity / area)	CFP (intensity / area)	mCherry (intensity / area)	YFP (intensity / area)	CFP (intensity / area)	mCherry (intensity / area)	YFP (intensity / area)	CFP (intensity / area)	mCherry (intensity / area)	YFP (intensity / area)	CFP (intensity / area)	M1 / Y1	M2 / Y2	C1 / Y1	C2 / Y2	C1 / M1	C2 / M2	M1 / CTRL	M2 / CTRL	C1 / CTRL	C2 / CTRL	C1/M1 CTRL	C2/M2 CTRL	M p-value	C p-value	C/M p-value	M % diff	C % diff	C/M % diff
CTRL	1	862.496	206.315	313.318	1013.49	280.725	340.153	242.924	205.693	119.585	276.853	306.45	121.371	2.92081	2.68448	0.934687	0.782527	0.320009	0.291501	1.04216	0.957837	1.08861	0.911391	1.04662	0.953381	0.714376	0.216361	0.00191504	12.0681	-31.6965	-42.9802
CTRL	2	308.202	140.405	163.22	506.59	224.016	296.034	56.549	145.246	43.253	61.984	301.529	44.713	1.77298	1.99684	0.849236	1.12515	0.478988	0.563465	0.940619	1.05938	0.860255	1.13975	0.918963	1.08104
RFC3	1	536.586	145.259	173.931	309.85	132.652	113.323	184.62	119.207	101.92	163.499	134.284	94.074	2.49572	1.02366	0.522749	0.115535	0.209458	0.112865	0.890489	0.365248	0.608834	0.134561	0.685051	0.369135
RFC3	2	760.712	208.787	288.615	740.846	254.672	244.052	56.032	114.583	45.617	51.796	150.854	40.973	3.38526	2.69732	1.17498	0.788296	0.347086	0.292252	1.79598	1.43101	1.19022	0.798524	0.665904	0.5607
siRNA	BioRep	mCherry (intensity / area)	YFP (intensity / area)	CFP (intensity / area)	mCherry (intensity / area)	YFP (intensity / area)	CFP (intensity / area)	mCherry (intensity / area)	YFP (intensity / area)	CFP (intensity / area)	mCherry (intensity / area)	YFP (intensity / area)	CFP (intensity / area)	M1 / Y1	M2 / Y2	C1 / Y1	C2 / Y2	C1 / M1	C2 / M2	M1 / CTRL	M2 / CTRL	C1 / CTRL	C2 / CTRL	C1/M1 CTRL	C2/M2 CTRL	M p-value	C p-value	C/M p-value	M % diff	C % diff	C/M % diff
CTRL	1	862.496	206.315	313.318	1013.49	280.725	340.153	242.924	205.693	119.585	276.853	306.45	121.371	2.92081	2.68448	0.934687	0.782527	0.320009	0.291501	1.04216	0.957837	1.08861	0.911391	1.04662	0.953381	2.7497e-05	0.00225738	0.152103	-49.719	-61.2966	-25.708
CTRL	2	308.202	140.405	163.22	506.59	224.016	296.034	56.549	145.246	43.253	61.984	301.529	44.713	1.77298	1.99684	0.849236	1.12515	0.478988	0.563465	0.940619	1.05938	0.860255	1.13975	0.918963	1.08104
CAD	1	310.053	124.037	141.747	349.361	148.482	151.7	112.111	158.341	78.361	121.173	148.169	84.37	1.5593	1.56732	0.486802	0.47369	0.312193	0.302229	0.556368	0.559229	0.566967	0.551696	1.02105	0.988468
CAD	2	312.529	301.508	103.817	246.868	213.089	95.475	63.537	380.115	45.88	63.03	338.632	46.112	0.826663	0.861539	0.191773	0.232199	0.231984	0.269516	0.438569	0.457072	0.194261	0.235211	0.445074	0.517081
siRNA	BioRep	mCherry (intensity / area)	YFP (intensity / area)	CFP (intensity / area)	mCherry (intensity / area)	YFP (intensity / area)	CFP (intensity / area)	mCherry (intensity / area)	YFP (intensity / area)	CFP (intensity / area)	mCherry (intensity / area)	YFP (intensity / area)	CFP (intensity / area)	M1 / Y1	M2 / Y2	C1 / Y1	C2 / Y2	C1 / M1	C2 / M2	M1 / CTRL	M2 / CTRL	C1 / CTRL	C2 / CTRL	C1/M1 CTRL	C2/M2 CTRL	M p-value	C p-value	C/M p-value	M % diff	C % diff	C/M % diff
CTRL	1	862.496	206.315	313.318	1013.49	280.725	340.153	242.924	205.693	119.585	276.853	306.45	121.371	2.92081	2.68448	0.934687	0.782527	0.320009	0.291501	1.04216	0.957837	1.08861	0.911391	1.04662	0.953381	0.00973242	0.0365455	0.248091	-18.1072	-25.8208	-9.37193
CTRL	2	308.202	140.405	163.22	506.59	224.016	296.034	56.549	145.246	43.253	61.984	301.529	44.713	1.77298	1.99684	0.849236	1.12515	0.478988	0.563465	0.940619	1.05938	0.860255	1.13975	0.918963	1.08104
MRPS31	1	643.625	203.171	237.308	718.038	247.216	269.899	165.449	233.743	98.444	208.531	281.506	114.961	2.24754	2.14811	0.642835	0.660137	0.286017	0.30731	0.801936	0.766459	0.748695	0.768847	0.935446	1.00509
MRPS31	2	774.061	486.189	315.712	701.385	363.268	367.187	59.766	293.234	46.536	66.948	383.617	48.727	1.46179	1.75636	0.551392	0.879669	0.377204	0.500849	0.77552	0.931799	0.558546	0.891082	0.723686	0.960905
siRNA	BioRep	mCherry (intensity / area)	YFP (intensity / area)	CFP (intensity / area)	mCherry (intensity / area)	YFP (intensity / area)	CFP (intensity / area)	mCherry (intensity / area)	YFP (intensity / area)	CFP (intensity / area)	mCherry (intensity / area)	YFP (intensity / area)	CFP (intensity / area)	M1 / Y1	M2 / Y2	C1 / Y1	C2 / Y2	C1 / M1	C2 / M2	M1 / CTRL	M2 / CTRL	C1 / CTRL	C2 / CTRL	C1/M1 CTRL	C2/M2 CTRL	M p-value	C p-value	C/M p-value	M % diff	C % diff	C/M % diff
CTRL	1	862.496	206.315	313.318	1013.49	280.725	340.153	242.924	205.693	119.585	276.853	306.45	121.371	2.92081	2.68448	0.934687	0.782527	0.320009	0.291501	1.04216	0.957837	1.08861	0.911391	1.04662	0.953381	0.00783569	0.00131634	0.00344781	-51.6115	-68.1027	-33.124
CTRL	2	308.202	140.405	163.22	506.59	224.016	296.034	56.549	145.246	43.253	61.984	301.529	44.713	1.77298	1.99684	0.849236	1.12515	0.478988	0.563465	0.940619	1.05938	0.860255	1.13975	0.918963	1.08104
RPS17	1	318.775	162.652	143.285	345.981	141.026	156.447	114.499	54.712	74.272	255.709	102.06	162.301	0.821822	1.14076	0.153693	0.270592	0.187015	0.237203	0.293231	0.40703	0.179003	0.315152	0.61165	0.775794
RPS17	2	223.098	118.906	96.498	203.332	113.538	92.976	53.912	59.751	42.889	55.469	93.997	41.466	1.41631	1.30918	0.456836	0.447414	0.322554	0.341752	0.751393		0.462763		0.618837
siRNA	BioRep	mCherry (intensity / area)	YFP (intensity / area)	CFP (intensity / area)	mCherry (intensity / area)	YFP (intensity / area)	CFP (intensity / area)	mCherry (intensity / area)	YFP (intensity / area)	CFP (intensity / area)	mCherry (intensity / area)	YFP (intensity / area)	CFP (intensity / area)	M1 / Y1	M2 / Y2	C1 / Y1	C2 / Y2	C1 / M1	C2 / M2	M1 / CTRL	M2 / CTRL	C1 / CTRL	C2 / CTRL	C1/M1 CTRL	C2/M2 CTRL	M p-value	C p-value	C/M p-value	M % diff	C % diff	C/M % diff
CTRL	1	862.496	206.315	313.318	1013.49	280.725	340.153	242.924	205.693	119.585	276.853	306.45	121.371	2.92081	2.68448	0.934687	0.782527	0.320009	0.291501	1.04216	0.957837	1.08861	0.911391	1.04662	0.953381	4.18777e-05	0.000672537	0.153865	-70.6216	-74.4542	-19.8195
CTRL	2	308.202	140.405	163.22	506.59	224.016	296.034	56.549	145.246	43.253	61.984	301.529	44.713	1.77298	1.99684	0.849236	1.12515	0.478988	0.563465	0.940619	1.05938	0.860255	1.13975	0.918963	1.08104
CSE1L	1	525.487	287.731	218.955	377.774	318.18	140.384	180.619	218.096	98.514	110.829	174.393	74.768	1.31985	0.729304	0.459853	0.168908	0.348412	0.231601	0.470932	0.26022	0.53558	0.196723	1.13951	0.757472
CSE1L	2	241.48	410.123	111.48	240.662	415.217	108.297	69.259	575.57	51.03	67.549	442.26	50.821	0.42201	0.414863	0.14765	0.138172	0.349872	0.333056	0.223889	0.220097	0.149565	0.139965	0.671249	0.638985
siRNA	BioRep	mCherry (intensity / area)	YFP (intensity / area)	CFP (intensity / area)	mCherry (intensity / area)	YFP (intensity / area)	CFP (intensity / area)	mCherry (intensity / area)	YFP (intensity / area)	CFP (intensity / area)	mCherry (intensity / area)	YFP (intensity / area)	CFP (intensity / area)	M1 / Y1	M2 / Y2	C1 / Y1	C2 / Y2	C1 / M1	C2 / M2	M1 / CTRL	M2 / CTRL	C1 / CTRL	C2 / CTRL	C1/M1 CTRL	C2/M2 CTRL	M p-value	C p-value	C/M p-value	M % diff	C % diff	C/M % diff
CTRL	1	862.496	206.315	313.318	1013.49	280.725	340.153	242.924	205.693	119.585	276.853	306.45	121.371	2.92081	2.68448	0.934687	0.782527	0.320009	0.291501	1.04216	0.957837	1.08861	0.911391	1.04662	0.953381	0.454726	0.103306	0.0283539	7.42468	-16.9643	-21.5033
CTRL	2	308.202	140.405	163.22	506.59	224.016	296.034	56.549	145.246	43.253	61.984	301.529	44.713	1.77298	1.99684	0.849236	1.12515	0.478988	0.563465	0.940619	1.05938	0.860255	1.13975	0.918963	1.08104
MTHFD2	1	1033.14	267.711	276.781	761.907	199.366	268.41	272.238	288.573	129.238	243.911	277.901	114.225	2.89517	2.52717	0.579167	0.735725	0.200046	0.291126	1.03301	0.90171	0.674543	0.856882	0.654268	0.952153
MTHFD2	2	512.071	225.136	237.099	548.924	192.512	230.106	66.087	395.224	45.716	73.64	268.215	54.186	1.96418	2.48847	0.831266	0.935812	0.423213	0.376059	1.04206	1.32021	0.842052	0.947953	0.811957	0.721489
siRNA	BioRep	mCherry (intensity / area)	YFP (intensity / area)	CFP (intensity / area)	mCherry (intensity / area)	YFP (intensity / area)	CFP (intensity / area)	mCherry (intensity / area)	YFP (intensity / area)	CFP (intensity / area)	mCherry (intensity / area)	YFP (intensity / area)	CFP (intensity / area)	M1 / Y1	M2 / Y2	C1 / Y1	C2 / Y2	C1 / M1	C2 / M2	M1 / CTRL	M2 / CTRL	C1 / CTRL	C2 / CTRL	C1/M1 CTRL	C2/M2 CTRL	M p-value	C p-value	C/M p-value	M % diff	C % diff	C/M % diff
CTRL	1	862.496	206.315	313.318	1013.49	280.725	340.153	242.924	205.693	119.585	276.853	306.45	121.371	2.92081	2.68448	0.934687	0.782527	0.320009	0.291501	1.04216	0.957837	1.08861	0.911391	1.04662	0.953381	0.096828	0.514025	0.0628076	-24.2153	-12.6567	13.7299
CTRL	2	308.202	140.405	163.22	506.59	224.016	296.034	56.549	145.246	43.253	61.984	301.529	44.713	1.77298	1.99684	0.849236	1.12515	0.478988	0.563465	0.940619	1.05938	0.860255	1.13975	0.918963	1.08104
AGO1	1	290.224	149.673	138.246	723.252	283.536	293.305	102.075	150.269	75.35	101.942	133.604	79.094	1.25751	2.19106	0.407715	0.762101	0.324224	0.347823	0.448687	0.781782	0.474857	0.887601	1.0604	1.13759
AGO1	2	443.65	265.417	261.317	859.352	411.549	573.314	54.013	174.586	42.068	63.79	516.966	46.239	1.4496	1.94497	0.818197	1.28578	0.56443	0.661078	0.769056	1.03186	0.828813	1.30246	1.08289	1.26831
siRNA	BioRep	mCherry (intensity / area)	YFP (intensity / area)	CFP (intensity / area)	mCherry (intensity / area)	YFP (intensity / area)	CFP (intensity / area)	mCherry (intensity / area)	YFP (intensity / area)	CFP (intensity / area)	mCherry (intensity / area)	YFP (intensity / area)	CFP (intensity / area)	M1 / Y1	M2 / Y2	C1 / Y1	C2 / Y2	C1 / M1	C2 / M2	M1 / CTRL	M2 / CTRL	C1 / CTRL	C2 / CTRL	C1/M1 CTRL	C2/M2 CTRL	M p-value	C p-value	C/M p-value	M % diff	C % diff	C/M % diff
CTRL	1	412.861	136.877	180.001	380.354	134.659	148.531	102.438	156.815	60.733	107.663	126.738	64.072	2.24881	2.04445	0.859155	0.639604	0.382048	0.312849	1.0476	0.952399	1.14649	0.853512	1.09958	0.900418	0.0559497	0.0163673	0.00913222	-26.1518	-43.2694	-23.8928
CTRL	2	335.132	189.18	182.018	337.423	191.6	174.717	63.959	173.992	44.171	71.778	338.074	49.331	1.41275	1.40686	0.715017	0.667881	0.506118	0.474731	1.00209	0.997912	1.03409	0.965915	1.032	0.968
DDX21	1	315.027	116.438	119.604	102.257	68.906	56.156	64.891	58.208	44.647	73.838	58.666	54.753	2.10981	0.477353	0.600354	0.0936929	0.284553	0.196276	0.982849		0.801135		0.818978
DDX21	2	261.474	244.483	118.637	323.774	293.735	134.003	55.336	131.909	41.688	60.491	159.655	43.336	0.832616	0.905103	0.311371	0.311475	0.373967	0.344132	0.59059	0.642006	0.450317	0.450466	0.762538	0.701701
siRNA	BioRep	mCherry (intensity / area)	YFP (intensity / area)	CFP (intensity / area)	mCherry (intensity / area)	YFP (intensity / area)	CFP (intensity / area)	mCherry (intensity / area)	YFP (intensity / area)	CFP (intensity / area)	mCherry (intensity / area)	YFP (intensity / area)	CFP (intensity / area)	M1 / Y1	M2 / Y2	C1 / Y1	C2 / Y2	C1 / M1	C2 / M2	M1 / CTRL	M2 / CTRL	C1 / CTRL	C2 / CTRL	C1/M1 CTRL	C2/M2 CTRL	M p-value	C p-value	C/M p-value	M % diff	C % diff	C/M % diff
CTRL	1	412.861	136.877	180.001	380.354	134.659	148.531	102.438	156.815	60.733	107.663	126.738	64.072	2.24881	2.04445	0.859155	0.639604	0.382048	0.312849	1.0476	0.952399	1.14649	0.853512	1.09958	0.900418	0.513038	0.593248	0.98007	7.06984	6.74672	0.141546
CTRL	2	335.132	189.18	182.018	337.423	191.6	174.717	63.959	173.992	44.171	71.778	338.074	49.331	1.41275	1.40686	0.715017	0.667881	0.506118	0.474731	1.00209	0.997912	1.03409	0.965915	1.032	0.968
IPO4	1	472.11	131.049	195.329	293.256	107.396	133.336	100.597	113.781	66.143	105.07	96.002	58.358	2.81785	1.77309	1.01549	0.661901	0.360376	0.373304	1.31269	0.825986	1.3551	0.883265	1.03721	1.07441
IPO4	2	408.883	227.604	210.536	316.933	175.897	160.968	57.834	189.498	43.522	56.364	144.033	42.889	1.5456	1.47719	0.735183	0.669497	0.475663	0.453222	1.09632	1.0478	1.06325	0.968252	0.969899	0.924141
siRNA	BioRep	mCherry (intensity / area)	YFP (intensity / area)	CFP (intensity / area)	mCherry (intensity / area)	YFP (intensity / area)	CFP (intensity / area)	mCherry (intensity / area)	YFP (intensity / area)	CFP (intensity / area)	mCherry (intensity / area)	YFP (intensity / area)	CFP (intensity / area)	M1 / Y1	M2 / Y2	C1 / Y1	C2 / Y2	C1 / M1	C2 / M2	M1 / CTRL	M2 / CTRL	C1 / CTRL	C2 / CTRL	C1/M1 CTRL	C2/M2 CTRL	M p-value	C p-value	C/M p-value	M % diff	C % diff	C/M % diff
CTRL	1	412.861	136.877	180.001	380.354	134.659	148.531	102.438	156.815	60.733	107.663	126.738	64.072	2.24881	2.04445	0.859155	0.639604	0.382048	0.312849	1.0476	0.952399	1.14649	0.853512	1.09958	0.900418	0.00689197	0.00621402	0.0335995	-39.9771	-51.6165	-21.3731
CTRL	2	335.132	189.18	182.018	337.423	191.6	174.717	63.959	173.992	44.171	71.778	338.074	49.331	1.41275	1.40686	0.715017	0.667881	0.506118	0.474731	1.00209	0.997912	1.03409	0.965915	1.032	0.968
DNM2	1	311.413	110.489	127.747	203.928	102.218	91.311	117.005	155.438	65.538	95.563	174.98	62.337	1.85656	0.955252	0.577519	0.267795	0.31107	0.28034	0.86487	0.445001	0.770663	0.357356	0.895298	0.806852
DNM2	2	379.072	348.527	178.186	283.189	325.413	112.831	70.724	248.705	50.112	70.544	297.072	50.781	0.884976	0.653185	0.366512	0.191709	0.41415	0.293498	0.62773	0.463316	0.530064	0.277256	0.844471	0.598457
siRNA	BioRep	mCherry (intensity / area)	YFP (intensity / area)	CFP (intensity / area)	mCherry (intensity / area)	YFP (intensity / area)	CFP (intensity / area)	mCherry (intensity / area)	YFP (intensity / area)	CFP (intensity / area)	mCherry (intensity / area)	YFP (intensity / area)	CFP (intensity / area)	M1 / Y1	M2 / Y2	C1 / Y1	C2 / Y2	C1 / M1	C2 / M2	M1 / CTRL	M2 / CTRL	C1 / CTRL	C2 / CTRL	C1/M1 CTRL	C2/M2 CTRL	M p-value	C p-value	C/M p-value	M % diff	C % diff	C/M % diff
CTRL	1	412.861	136.877	180.001	380.354	134.659	148.531	102.438	156.815	60.733	107.663	126.738	64.072	2.24881	2.04445	0.859155	0.639604	0.382048	0.312849	1.0476	0.952399	1.14649	0.853512	1.09958	0.900418	0.3432	0.0447731	0.817233	-22.5532	-39.0499	-5.85431
CTRL	2	335.132	189.18	182.018	337.423	191.6	174.717	63.959	173.992	44.171	71.778	338.074	49.331	1.41275	1.40686	0.715017	0.667881	0.506118	0.474731	1.00209	0.997912	1.03409	0.965915	1.032	0.968
MBNL1	1	106.725	74.912	62.717	130.735	88.868	78.786	78.268	69.008	51.562	70.048	60.469	47.494	0.434737	0.636641	0.17606	0.32923	0.404981	0.517136		0.296577		0.439337		1.48838
MBNL1	2	323.606	159.466	144.866	218.749	131.937	87.554	59.491	121.645	44.163	60.342	120.081	44.14	1.65358	1.20385	0.631574	0.328964	0.381944	0.27326	1.17291	0.853914	0.913405	0.47576	0.778801	0.557189
siRNA	BioRep	mCherry (intensity / area)	YFP (intensity / area)	CFP (intensity / area)	mCherry (intensity / area)	YFP (intensity / area)	CFP (intensity / area)	mCherry (intensity / area)	YFP (intensity / area)	CFP (intensity / area)	mCherry (intensity / area)	YFP (intensity / area)	CFP (intensity / area)	M1 / Y1	M2 / Y2	C1 / Y1	C2 / Y2	C1 / M1	C2 / M2	M1 / CTRL	M2 / CTRL	C1 / CTRL	C2 / CTRL	C1/M1 CTRL	C2/M2 CTRL	M p-value	C p-value	C/M p-value	M % diff	C % diff	C/M % diff
CTRL	1	412.861	136.877	180.001	380.354	134.659	148.531	102.438	156.815	60.733	107.663	126.738	64.072	2.24881	2.04445	0.859155	0.639604	0.382048	0.312849	1.0476	0.952399	1.14649	0.853512	1.09958	0.900418	6.32049e-05	0.00199587	0.0148173	-54.6677	-67.9727	-29.2234
CTRL	2	335.132	189.18	182.018	337.423	191.6	174.717	63.959	173.992	44.171	71.778	338.074	49.331	1.41275	1.40686	0.715017	0.667881	0.506118	0.474731	1.00209	0.997912	1.03409	0.965915	1.032	0.968
EIF3C	1	196.886	112.475	82.836	169.053	92.258	72.456	83.074	65.585	53.266	82.83	59.68	52.343	1.01297	0.933263	0.267006	0.213006	0.263587	0.228238	0.471889	0.434757	0.356303	0.284243	0.758635	0.656896
EIF3C	2	113.663	77.035	49.564	142.531	64.313	60.236	51.779	62.938	40.547	52.718	56.679	40.782	0.797229	1.4038	0.115525	0.304316	0.144909	0.216781
siRNA	BioRep	mCherry (intensity / area)	YFP (intensity / area)	CFP (intensity / area)	mCherry (intensity / area)	YFP (intensity / area)	CFP (intensity / area)	mCherry (intensity / area)	YFP (intensity / area)	CFP (intensity / area)	mCherry (intensity / area)	YFP (intensity / area)	CFP (intensity / area)	M1 / Y1	M2 / Y2	C1 / Y1	C2 / Y2	C1 / M1	C2 / M2	M1 / CTRL	M2 / CTRL	C1 / CTRL	C2 / CTRL	C1/M1 CTRL	C2/M2 CTRL	M p-value	C p-value	C/M p-value	M % diff	C % diff	C/M % diff
CTRL	1	412.861	136.877	180.001	380.354	134.659	148.531	102.438	156.815	60.733	107.663	126.738	64.072	2.24881	2.04445	0.859155	0.639604	0.382048	0.312849	1.0476	0.952399	1.14649	0.853512	1.09958	0.900418	0.212322	0.0524071	0.00432828	-23.6831	-39.9319	-22.8683
CTRL	2	335.132	189.18	182.018	337.423	191.6	174.717	63.959	173.992	44.171	71.778	338.074	49.331	1.41275	1.40686	0.715017	0.667881	0.506118	0.474731	1.00209	0.997912	1.03409	0.965915	1.032	0.968
MCCC1	1	198.072	106.53	85.967	225.606	110.985	91.911	113.104	135.724	65.622	84.342	107.049	54.867	0.932592	1.14324	0.241458	0.285322	0.258911	0.249572	0.434445	0.532576	0.32221	0.380745	0.745176	0.7183
MCCC1	2	842.694	486.755	371.267	360.821	233.761	158.166	52.886	126.801	42.02	52.741	115.766	41.378	1.62275	1.31762	0.677072	0.498231	0.417238	0.37813	1.15104	0.93461	0.979207	0.720561	0.850768	0.771026
siRNA	BioRep	mCherry (intensity / area)	YFP (intensity / area)	CFP (intensity / area)	mCherry (intensity / area)	YFP (intensity / area)	CFP (intensity / area)	mCherry (intensity / area)	YFP (intensity / area)	CFP (intensity / area)	mCherry (intensity / area)	YFP (intensity / area)	CFP (intensity / area)	M1 / Y1	M2 / Y2	C1 / Y1	C2 / Y2	C1 / M1	C2 / M2	M1 / CTRL	M2 / CTRL	C1 / CTRL	C2 / CTRL	C1/M1 CTRL	C2/M2 CTRL	M p-value	C p-value	C/M p-value	M % diff	C % diff	C/M % diff
CTRL	1	412.861	136.877	180.001	380.354	134.659	148.531	102.438	156.815	60.733	107.663	126.738	64.072	2.24881	2.04445	0.859155	0.639604	0.382048	0.312849	1.0476	0.952399	1.14649	0.853512	1.09958	0.900418	0.00837902	0.0507295	0.183552	-27.9356	-22.8186	7.61539
CTRL	2	335.132	189.18	182.018	337.423	191.6	174.717	63.959	173.992	44.171	71.778	338.074	49.331	1.41275	1.40686	0.715017	0.667881	0.506118	0.474731	1.00209	0.997912	1.03409	0.965915	1.032	0.968
FAM133B	1	267.199	102.152	126.949	249.848	116.692	117.067	114.21	157.045	63.343	115.896	197.691	69.575	1.48941	1.15513	0.592157	0.433689	0.397579	0.375444	0.693835	0.538115	0.790196	0.57873	1.14428	1.08057
FAM133B	2	318.48	213.085	178.728	244.569	165.527	134.82	65.292	184.816	45.59	54.898	150.718	41.07	1.21259	1.11446	0.635418	0.552719	0.524016	0.495951	0.860113	0.79051	0.918965	0.799364	1.06849	1.01127
siRNA	BioRep	mCherry (intensity / area)	YFP (intensity / area)	CFP (intensity / area)	mCherry (intensity / area)	YFP (intensity / area)	CFP (intensity / area)	mCherry (intensity / area)	YFP (intensity / area)	CFP (intensity / area)	mCherry (intensity / area)	YFP (intensity / area)	CFP (intensity / area)	M1 / Y1	M2 / Y2	C1 / Y1	C2 / Y2	C1 / M1	C2 / M2	M1 / CTRL	M2 / CTRL	C1 / CTRL	C2 / CTRL	C1/M1 CTRL	C2/M2 CTRL	M p-value	C p-value	C/M p-value	M % diff	C % diff	C/M % diff
CTRL	1	412.861	136.877	180.001	380.354	134.659	148.531	102.438	156.815	60.733	107.663	126.738	64.072	2.24881	2.04445	0.859155	0.639604	0.382048	0.312849	1.0476	0.952399	1.14649	0.853512	1.09958	0.900418	#DIV/0!	#DIV/0!	#DIV/0!	-65.1979	-85.7354	-58.8179
CTRL	2	335.132	189.18	182.018	337.423	191.6	174.717	63.959	173.992	44.171	71.778	338.074	49.331	1.41275	1.40686	0.715017	0.667881	0.506118	0.474731	1.00209	0.997912	1.03409	0.965915	1.032	0.968
MOV10	1	139.783	69.299	70.405	175.911	81.205	82.126	128.887	82.212	78.238	101.603	82.582	68.653	0.354089	0.747072	-0.0438751	0.106896	-0.12391	0.143087		0.348021		0.142646		0.411821
MOV10	2	152.402	87.162	77.593	111.563	70.33	58.99	52.846	81.092	40.724	51.631	69.959	39.856	1.14916	0.843516	0.427973	0.265889	0.372421	0.315215
siRNA	BioRep	mCherry (intensity / area)	YFP (intensity / area)	CFP (intensity / area)	mCherry (intensity / area)	YFP (intensity / area)	CFP (intensity / area)	mCherry (intensity / area)	YFP (intensity / area)	CFP (intensity / area)	mCherry (intensity / area)	YFP (intensity / area)	CFP (intensity / area)	M1 / Y1	M2 / Y2	C1 / Y1	C2 / Y2	C1 / M1	C2 / M2	M1 / CTRL	M2 / CTRL	C1 / CTRL	C2 / CTRL	C1/M1 CTRL	C2/M2 CTRL	M p-value	C p-value	C/M p-value	M % diff	C % diff	C/M % diff
CTRL	1	412.861	136.877	180.001	380.354	134.659	148.531	102.438	156.815	60.733	107.663	126.738	64.072	2.24881	2.04445	0.859155	0.639604	0.382048	0.312849	1.0476	0.952399	1.14649	0.853512	1.09958	0.900418	0.213909	0.0331172	0.0112493	-9.79927	-32.4497	-25.9296
CTRL	2	335.132	189.18	182.018	337.423	191.6	174.717	63.959	173.992	44.171	71.778	338.074	49.331	1.41275	1.40686	0.715017	0.667881	0.506118	0.474731	1.00209	0.997912	1.03409	0.965915	1.032	0.968
CNOT8	1	369.387	144.246	124.898	370.661	109.882	150.548	129.054	196.475	79.209	95.565	153.765	63.768	1.78222	2.35117	0.370267	0.719495	0.207756	0.306015	0.830239	1.09529	0.494098	0.96012	0.597948	0.880749
CNOT8	2	392.938	296.411	166.499	359.965	236.285	152.557	62.551	206.271	45.262	62.901	183.571	45.347	1.11403	1.25797	0.408873	0.453912	0.36702	0.360829	0.790205	0.8923	0.591328	0.656464	0.748372	0.735748
siRNA	BioRep	mCherry (intensity / area)	YFP (intensity / area)	CFP (intensity / area)	mCherry (intensity / area)	YFP (intensity / area)	CFP (intensity / area)	mCherry (intensity / area)	YFP (intensity / area)	CFP (intensity / area)	mCherry (intensity / area)	YFP (intensity / area)	CFP (intensity / area)	M1 / Y1	M2 / Y2	C1 / Y1	C2 / Y2	C1 / M1	C2 / M2	M1 / CTRL	M2 / CTRL	C1 / CTRL	C2 / CTRL	C1/M1 CTRL	C2/M2 CTRL	M p-value	C p-value	C/M p-value	M % diff	C % diff	C/M % diff
CTRL	1	412.861	136.877	180.001	380.354	134.659	148.531	102.438	156.815	60.733	107.663	126.738	64.072	2.24881	2.04445	0.859155	0.639604	0.382048	0.312849	1.0476	0.952399	1.14649	0.853512	1.09958	0.900418	0.928851	0.805968	0.937238	1.85298	10.1011	-1.48767
CTRL	2	335.132	189.18	182.018	337.423	191.6	174.717	63.959	173.992	44.171	71.778	338.074	49.331	1.41275	1.40686	0.715017	0.667881	0.506118	0.474731	1.00209	0.997912	1.03409	0.965915	1.032	0.968
GRSF1	1	591.984	206.657	214.791	435.487	189.182	159.504	217.358	200.27	109.916	204.77	168.604	105.936	1.84325	1.18628	0.517113	0.272637	0.280544	0.229825	0.85867	0.552625	0.690055	0.363817	0.807441	0.661464
GRSF1	2	1329.41	747.732	669.777	1004.36	459.253	727.559	55.414	218.819	42.443	64.533	321.924	50.587	1.69772	2.05634	0.833537	1.48294	0.490975	0.721153	1.20422	1.4586	1.20549	2.14468	1.00112	1.47047
siRNA	BioRep	mCherry (intensity / area)	YFP (intensity / area)	CFP (intensity / area)	mCherry (intensity / area)	YFP (intensity / area)	CFP (intensity / area)	mCherry (intensity / area)	YFP (intensity / area)	CFP (intensity / area)	mCherry (intensity / area)	YFP (intensity / area)	CFP (intensity / area)	M1 / Y1	M2 / Y2	C1 / Y1	C2 / Y2	C1 / M1	C2 / M2	M1 / CTRL	M2 / CTRL	C1 / CTRL	C2 / CTRL	C1/M1 CTRL	C2/M2 CTRL	M p-value	C p-value	C/M p-value	M % diff	C % diff	C/M % diff
CTRL	1	412.861	136.877	180.001	380.354	134.659	148.531	102.438	156.815	60.733	107.663	126.738	64.072	2.24881	2.04445	0.859155	0.639604	0.382048	0.312849	1.0476	0.952399	1.14649	0.853512	1.09958	0.900418	0.163749	0.117748	0.0071449	24.4201	-23.9649	-38.2822
CTRL	2	335.132	189.18	182.018	337.423	191.6	174.717	63.959	173.992	44.171	71.778	338.074	49.331	1.41275	1.40686	0.715017	0.667881	0.506118	0.474731	1.00209	0.997912	1.03409	0.965915	1.032	0.968
NUP155	1	425.469	147.672	149.156				97.67	99.964	59.626	91.946	99.913	60.755	2.23916	#DIV/0!	0.602453	#DIV/0!	0.269054	0.634867	1.0431		0.803936		0.774369
NUP155	2	614.715	244.058	207.503	746.604	442.149	207.958	71.061	227.487	50.612	59.662	241.409	43.491	2.25091	1.54075	0.657432	0.363919	0.292073	0.236196	1.59661	1.09288	0.950803	0.526314	0.595551	0.481614
siRNA	BioRep	mCherry (intensity / area)	YFP (intensity / area)	CFP (intensity / area)	mCherry (intensity / area)	YFP (intensity / area)	CFP (intensity / area)	mCherry (intensity / area)	YFP (intensity / area)	CFP (intensity / area)	mCherry (intensity / area)	YFP (intensity / area)	CFP (intensity / area)	M1 / Y1	M2 / Y2	C1 / Y1	C2 / Y2	C1 / M1	C2 / M2	M1 / CTRL	M2 / CTRL	C1 / CTRL	C2 / CTRL	C1/M1 CTRL	C2/M2 CTRL	M p-value	C p-value	C/M p-value	M % diff	C % diff	C/M % diff
CTRL	1	412.861	136.877	180.001	380.354	134.659	148.531	102.438	156.815	60.733	107.663	126.738	64.072	2.24881	2.04445	0.859155	0.639604	0.382048	0.312849	1.0476	0.952399	1.14649	0.853512	1.09958	0.900418	0.00494081	0.0134769	0.39564	-34.2093	-37.2368	-5.02318
CTRL	2	335.132	189.18	182.018	337.423	191.6	174.717	63.959	173.992	44.171	71.778	338.074	49.331	1.41275	1.40686	0.715017	0.667881	0.506118	0.474731	1.00209	0.997912	1.03409	0.965915	1.032	0.968
CSNK1A1	1	178.17	84.139	88.953	276.515	103.631	128.47	107.692	130.173	66.551	89.141	97.122	60.144	0.947878	1.71858	0.304324	0.628408	0.321058	0.365654	0.441566	0.800596	0.406101	0.83857	0.924044	1.0524
CSNK1A1	2	335.536	271.212	169.31	338.044	287.27	172.826	62.852	153.978	48.784	64.11	173.756	49.04	1.00311	0.955766	0.443926	0.43135	0.44255	0.451314	0.711523	0.677943	0.642022	0.623835	0.902381	0.92025
siRNA	BioRep	mCherry (intensity / area)	YFP (intensity / area)	CFP (intensity / area)	mCherry (intensity / area)	YFP (intensity / area)	CFP (intensity / area)	mCherry (intensity / area)	YFP (intensity / area)	CFP (intensity / area)	mCherry (intensity / area)	YFP (intensity / area)	CFP (intensity / area)	M1 / Y1	M2 / Y2	C1 / Y1	C2 / Y2	C1 / M1	C2 / M2	M1 / CTRL	M2 / CTRL	C1 / CTRL	C2 / CTRL	C1/M1 CTRL	C2/M2 CTRL	M p-value	C p-value	C/M p-value	M % diff	C % diff	C/M % diff
CTRL	1	412.861	136.877	180.001	380.354	134.659	148.531	102.438	156.815	60.733	107.663	126.738	64.072	2.24881	2.04445	0.859155	0.639604	0.382048	0.312849	1.0476	0.952399	1.14649	0.853512	1.09958	0.900418	0.00661677	0.00201844	0.564054	-35.7441	-40.8543	-5.33121
CTRL	2	335.132	189.18	182.018	337.423	191.6	174.717	63.959	173.992	44.171	71.778	338.074	49.331	1.41275	1.40686	0.715017	0.667881	0.506118	0.474731	1.00209	0.997912	1.03409	0.965915	1.032	0.968
HNRNPA3	1	276.094	160.482	124.472	251.293	169.157	119.341	80.016	98.839	52.244	79.029	99.878	54.12	1.22488	1.01545	0.444224	0.39111	0.362667	0.385159	0.570607	0.473044	0.592789	0.521912	1.0438	1.10854
HNRNPA3	2	465.234	329.971	211.3	259.697	219.819	124.04	57.871	168.708	44.649	58.003	180.351	44.945	1.23434	0.917846	0.504599	0.360492	0.4088	0.392759	0.875541	0.651045	0.72977	0.521357	0.833563	0.800854
siRNA	BioRep	mCherry (intensity / area)	YFP (intensity / area)	CFP (intensity / area)	mCherry (intensity / area)	YFP (intensity / area)	CFP (intensity / area)	mCherry (intensity / area)	YFP (intensity / area)	CFP (intensity / area)	mCherry (intensity / area)	YFP (intensity / area)	CFP (intensity / area)	M1 / Y1	M2 / Y2	C1 / Y1	C2 / Y2	C1 / M1	C2 / M2	M1 / CTRL	M2 / CTRL	C1 / CTRL	C2 / CTRL	C1/M1 CTRL	C2/M2 CTRL	M p-value	C p-value	C/M p-value	M % diff	C % diff	C/M % diff
CTRL	1	412.861	136.877	180.001	380.354	134.659	148.531	102.438	156.815	60.733	107.663	126.738	64.072	2.24881	2.04445	0.859155	0.639604	0.382048	0.312849	1.0476	0.952399	1.14649	0.853512	1.09958	0.900418	4.79913e-06	2.93946e-05	2.54736e-05	-31.8333	-73.2588	-60.7009
CTRL	2	335.132	189.18	182.018	337.423	191.6	174.717	63.959	173.992	44.171	71.778	338.074	49.331	1.41275	1.40686	0.715017	0.667881	0.506118	0.474731	1.00209	0.997912	1.03409	0.965915	1.032	0.968
NUP54	1	294.984	128.026	100.489	246.61	100.651	93.128	99.283	142.618	78.182	106.439	145.816	75.433	1.50066	1.42819	0.184974	0.162149	0.123262	0.113535	0.699075	0.665318	0.246836	0.216378	0.354764	0.326767
NUP54	2	365.399	319.573	111.504	296.257	251.238	97.384	57.203	183.93	45.58	55.899	215.392	43.657	0.96644	0.954099	0.209296	0.210022	0.216564	0.220126	0.685513	0.67676	0.302692	0.303742	0.441585	0.448847
siRNA	BioRep	mCherry (intensity / area)	YFP (intensity / area)	CFP (intensity / area)	mCherry (intensity / area)	YFP (intensity / area)	CFP (intensity / area)	mCherry (intensity / area)	YFP (intensity / area)	CFP (intensity / area)	mCherry (intensity / area)	YFP (intensity / area)	CFP (intensity / area)	M1 / Y1	M2 / Y2	C1 / Y1	C2 / Y2	C1 / M1	C2 / M2	M1 / CTRL	M2 / CTRL	C1 / CTRL	C2 / CTRL	C1/M1 CTRL	C2/M2 CTRL	M p-value	C p-value	C/M p-value	M % diff	C % diff	C/M % diff
CTRL	1	412.861	136.877	180.001	380.354	134.659	148.531	102.438	156.815	60.733	107.663	126.738	64.072	2.24881	2.04445	0.859155	0.639604	0.382048	0.312849	1.0476	0.952399	1.14649	0.853512	1.09958	0.900418	6.53196e-06	0.00239679	0.219947	-45.8738	-55.2459	-18.8441
CTRL	2	335.132	189.18	182.018	337.423	191.6	174.717	63.959	173.992	44.171	71.778	338.074	49.331	1.41275	1.40686	0.715017	0.667881	0.506118	0.474731	1.00209	0.997912	1.03409	0.965915	1.032	0.968
DAZAP1	1	283.45	143.48	125.49	311.415	157.547	146.732	112.75	214.555	68.753	105.18	156.511	67.766	1.21609	1.28501	0.398874	0.498089	0.327997	0.387614	0.566513	0.598619	0.532273	0.664669	0.944014	1.1156
DAZAP1	2	387.561	451.292	143.204	326.292	364.541	123.049	69.149	429.505	48.634	69.656	299.221	50.047	0.704995	0.704693	0.207988	0.202195	0.295021	0.286927	0.500066	0.499852	0.300801	0.292423	0.601562	0.585058
siRNA	BioRep	mCherry (intensity / area)	YFP (intensity / area)	CFP (intensity / area)	mCherry (intensity / area)	YFP (intensity / area)	CFP (intensity / area)	mCherry (intensity / area)	YFP (intensity / area)	CFP (intensity / area)	mCherry (intensity / area)	YFP (intensity / area)	CFP (intensity / area)	M1 / Y1	M2 / Y2	C1 / Y1	C2 / Y2	C1 / M1	C2 / M2	M1 / CTRL	M2 / CTRL	C1 / CTRL	C2 / CTRL	C1/M1 CTRL	C2/M2 CTRL	M p-value	C p-value	C/M p-value	M % diff	C % diff	C/M % diff
CTRL	1	412.861	136.877	180.001	380.354	134.659	148.531	102.438	156.815	60.733	107.663	126.738	64.072	2.24881	2.04445	0.859155	0.639604	0.382048	0.312849	1.0476	0.952399	1.14649	0.853512	1.09958	0.900418	3.60512e-07	0.000145142	0.0534991	-52.9771	-63.0497	-21.4418
CTRL	2	335.132	189.18	182.018	337.423	191.6	174.717	63.959	173.992	44.171	71.778	338.074	49.331	1.41275	1.40686	0.715017	0.667881	0.506118	0.474731	1.00209	0.997912	1.03409	0.965915	1.032	0.968
ILF2	1	521.637	353.802	209.529	425.913	293.515	171.338	178.236	247.432	95.186	104.913	378.315	72.287	1.07422	0.968736	0.355545	0.298457	0.330978	0.308089	0.500423	0.451282	0.474452	0.398272	0.952596	0.886717
ILF2	2	492.104	660.053	180.574	311.993	398.284	124.743	51.909	255.215	41.126	56.835	209.294	42.46	0.663177	0.646827	0.210257	0.208268	0.317046	0.321985	0.470404	0.458807	0.304082	0.301206	0.646471	0.656542
siRNA	BioRep	mCherry (intensity / area)	YFP (intensity / area)	CFP (intensity / area)	mCherry (intensity / area)	YFP (intensity / area)	CFP (intensity / area)	mCherry (intensity / area)	YFP (intensity / area)	CFP (intensity / area)	mCherry (intensity / area)	YFP (intensity / area)	CFP (intensity / area)	M1 / Y1	M2 / Y2	C1 / Y1	C2 / Y2	C1 / M1	C2 / M2	M1 / CTRL	M2 / CTRL	C1 / CTRL	C2 / CTRL	C1/M1 CTRL	C2/M2 CTRL	M p-value	C p-value	C/M p-value	M % diff	C % diff	C/M % diff
CTRL	1	412.861	136.877	180.001	380.354	134.659	148.531	102.438	156.815	60.733	107.663	126.738	64.072	2.24881	2.04445	0.859155	0.639604	0.382048	0.312849	1.0476	0.952399	1.14649	0.853512	1.09958	0.900418	9.52889e-05	7.77741e-05	0.000435087	-65.3772	-80.0161	-44.7879
CTRL	2	335.132	189.18	182.018	337.423	191.6	174.717	63.959	173.992	44.171	71.778	338.074	49.331	1.41275	1.40686	0.715017	0.667881	0.506118	0.474731	1.00209	0.997912	1.03409	0.965915	1.032	0.968
HNRNPK	1	286.253	155.336	112.562	222.394	145.129	90.92	109.406	126.768	66.576	108.074	139.573	73.685	1.14277	0.783124	0.273159	0.143248	0.239033	0.182919	0.532354	0.364816	0.364514	0.191156	0.687967	0.526464
HNRNPK	2	146.062	289.687	62.3	159.579	286.668	69.066	55.221	138.318	42.394	52.339	129.192	40.452	0.318558	0.369065	0.0720674	0.0964286	0.22623	0.261278	0.225959	0.261784	0.104227	0.139459	0.461295	0.532759
siRNA	BioRep	mCherry (intensity / area)	YFP (intensity / area)	CFP (intensity / area)	mCherry (intensity / area)	YFP (intensity / area)	CFP (intensity / area)	mCherry (intensity / area)	YFP (intensity / area)	CFP (intensity / area)	mCherry (intensity / area)	YFP (intensity / area)	CFP (intensity / area)	M1 / Y1	M2 / Y2	C1 / Y1	C2 / Y2	C1 / M1	C2 / M2	M1 / CTRL	M2 / CTRL	C1 / CTRL	C2 / CTRL	C1/M1 CTRL	C2/M2 CTRL	M p-value	C p-value	C/M p-value	M % diff	C % diff	C/M % diff
CTRL	1	412.861	136.877	180.001	380.354	134.659	148.531	102.438	156.815	60.733	107.663	126.738	64.072	2.24881	2.04445	0.859155	0.639604	0.382048	0.312849	1.0476	0.952399	1.14649	0.853512	1.09958	0.900418	1.60361e-07	0.00055315	0.127598	-57.2533	-49.8902	17.259
CTRL	2	335.132	189.18	182.018	337.423	191.6	174.717	63.959	173.992	44.171	71.778	338.074	49.331	1.41275	1.40686	0.715017	0.667881	0.506118	0.474731	1.00209	0.997912	1.03409	0.965915	1.032	0.968
PABPC1	1	309.664	198.679	163.615	301.377	184.878	149.41	130.306	123.268	82.048	118.682	81.531	66.658	0.932006	0.956755	0.449277	0.405981	0.482054	0.424331	0.434172	0.445701	0.599533	0.541757	1.38741	1.22128
PABPC1	2	556.905	818.559	284.46	343.864	470.997	201.065	65.96	528.263	51.728	77.723	941.426	54.475	0.592582	0.577546	0.282641	0.31415	0.476965	0.543938	0.42033	0.409664	0.408766	0.454335	0.972555	1.10912
siRNA	BioRep	mCherry (intensity / area)	YFP (intensity / area)	CFP (intensity / area)	mCherry (intensity / area)	YFP (intensity / area)	CFP (intensity / area)	mCherry (intensity / area)	YFP (intensity / area)	CFP (intensity / area)	mCherry (intensity / area)	YFP (intensity / area)	CFP (intensity / area)	M1 / Y1	M2 / Y2	C1 / Y1	C2 / Y2	C1 / M1	C2 / M2	M1 / CTRL	M2 / CTRL	C1 / CTRL	C2 / CTRL	C1/M1 CTRL	C2/M2 CTRL	M p-value	C p-value	C/M p-value	M % diff	C % diff	C/M % diff
CTRL	1	412.861	136.877	180.001	380.354	134.659	148.531	102.438	156.815	60.733	107.663	126.738	64.072	2.24881	2.04445	0.859155	0.639604	0.382048	0.312849	1.0476	0.952399	1.14649	0.853512	1.09958	0.900418	5.52379e-05	2.50713e-05	0.000487765	-51.476	-77.9712	-53.7376
CTRL	2	335.132	189.18	182.018	337.423	191.6	174.717	63.959	173.992	44.171	71.778	338.074	49.331	1.41275	1.40686	0.715017	0.667881	0.506118	0.474731	1.00209	0.997912	1.03409	0.965915	1.032	0.968
DDX17	1	279.982	144.473	125.913	261.675	124.136	113.53	129.085	230.53	83.421	167.583	316.735	108.851	0.911229	0.913039	0.206108	0.140121	0.226186	0.153466	0.424493	0.425336	0.275038	0.186982	0.650992	0.441694
DDX17	2	245.181	261.346	77.256	214.757	161.34	77.254	79.085	600.079	50.711	66.748	304.048	45.978	0.659143	0.87914	0.110625	0.179184	0.167832	0.203817	0.467543	0.623591	0.159991	0.259142	0.342218	0.415593
siRNA	BioRep	mCherry (intensity / area)	YFP (intensity / area)	CFP (intensity / area)	mCherry (intensity / area)	YFP (intensity / area)	CFP (intensity / area)	mCherry (intensity / area)	YFP (intensity / area)	CFP (intensity / area)	mCherry (intensity / area)	YFP (intensity / area)	CFP (intensity / area)	M1 / Y1	M2 / Y2	C1 / Y1	C2 / Y2	C1 / M1	C2 / M2	M1 / CTRL	M2 / CTRL	C1 / CTRL	C2 / CTRL	C1/M1 CTRL	C2/M2 CTRL	M p-value	C p-value	C/M p-value	M % diff	C % diff	C/M % diff
CTRL	1	412.861	136.877	180.001	380.354	134.659	148.531	102.438	156.815	60.733	107.663	126.738	64.072	2.24881	2.04445	0.859155	0.639604	0.382048	0.312849	1.0476	0.952399	1.14649	0.853512	1.09958	0.900418	8.95503e-05	0.000112573	0.00355389	-43.6076	-69.3752	-45.226
CTRL	2	335.132	189.18	182.018	337.423	191.6	174.717	63.959	173.992	44.171	71.778	338.074	49.331	1.41275	1.40686	0.715017	0.667881	0.506118	0.474731	1.00209	0.997912	1.03409	0.965915	1.032	0.968
PABPN1	1	254.346	142.274	106.656	230.106	117.038	96.309	94.374	126.593	68.363	82.62	98.082	59.821	1.1657	1.20994	0.299169	0.27527	0.256643	0.227507	0.543038	0.563646	0.399223	0.36733	0.73865	0.654792
PABPN1	2	340.114	429.371	96.052	285.895	241.609	85.805	56.406	190.466	41.387	53.533	217.184	39.584	0.664098	0.955782	0.129414	0.187574	0.194871	0.196252	0.471057	0.677954	0.187163	0.271276	0.397352	0.400166
siRNA	BioRep	mCherry (intensity / area)	YFP (intensity / area)	CFP (intensity / area)	mCherry (intensity / area)	YFP (intensity / area)	CFP (intensity / area)	mCherry (intensity / area)	YFP (intensity / area)	CFP (intensity / area)	mCherry (intensity / area)	YFP (intensity / area)	CFP (intensity / area)	M1 / Y1	M2 / Y2	C1 / Y1	C2 / Y2	C1 / M1	C2 / M2	M1 / CTRL	M2 / CTRL	C1 / CTRL	C2 / CTRL	C1/M1 CTRL	C2/M2 CTRL	M p-value	C p-value	C/M p-value	M % diff	C % diff	C/M % diff
CTRL	1				559.163	354.824	287.271	55.396	184.575	39.218	62.361	329.005	43.318		1.40995		0.69331	0.700901	0.491726		1		1	1.17539	0.82461	0.349274	0.309551	0.317381	-4.51739	16.5971	9.53273
CTRL	2	218.562	183.428	123.041	235.068	205.873	124.23	52.647	125.771	38.238	52.9	144.46	39.071	0.903834	0.885471	0.460052	0.415671	0.509001	0.469435	1.01026	0.989737	1.05068	0.949321	1.04044	0.959563
COPG1	1	228.296	127.974	162.865	133.905	62.804	94.549	52.165	46.985	37.698	51.158	45.417	37.512	1.38024	1.30953	0.978793	0.906694	0.709148	0.692383	0.978926	0.928774	1.41177	1.30778	1.18922	1.16111
COPG1	2	231.429	187.977	129.602	225.719	218.016	122.931	56.348	113.403	40.352	55.954	117.59	40.799	0.932444	0.777778	0.473603	0.37775	0.507916	0.485678	1.04224	0.869363	1.08163	0.862715	1.03822	0.992764
siRNA	BioRep	mCherry (intensity / area)	YFP (intensity / area)	CFP (intensity / area)	mCherry (intensity / area)	YFP (intensity / area)	CFP (intensity / area)	mCherry (intensity / area)	YFP (intensity / area)	CFP (intensity / area)	mCherry (intensity / area)	YFP (intensity / area)	CFP (intensity / area)	M1 / Y1	M2 / Y2	C1 / Y1	C2 / Y2	C1 / M1	C2 / M2	M1 / CTRL	M2 / CTRL	C1 / CTRL	C2 / CTRL	C1/M1 CTRL	C2/M2 CTRL	M p-value	C p-value	C/M p-value	M % diff	C % diff	C/M % diff
CTRL	1				559.163	354.824	287.271	55.396	184.575	39.218	62.361	329.005	43.318		1.40995		0.69331	0.700901	0.491726		1		1	1.17539	0.82461	0.010924	0.00247429	0.0100281	-51.9286	-63.6084	-31.5063
CTRL	2	218.562	183.428	123.041	235.068	205.873	124.23	52.647	125.771	38.238	52.9	144.46	39.071	0.903834	0.885471	0.460052	0.415671	0.509001	0.469435	1.01026	0.989737	1.05068	0.949321	1.04044	0.959563
IDH2	1	123.978	121.951	61.943	77.798	57.271	46.36	50.79	43.839	36.713	58.135	70.385	36.661	0.570028	0.407458	0.2071	0.168899	0.363315	0.414519	0.404289	0.288987	0.298711	0.243612	0.609268	0.695135
IDH2	2	198.167	207.269	94.837	82.474	86.136	46.781	50.108	44.385	37.762	48.896	55.918	35.347	0.717256	0.38279	0.281193	0.118725	0.392039	0.310157	0.801715	0.427864	0.642195	0.271147	0.801358	0.633985
siRNA	BioRep	mCherry (intensity / area)	YFP (intensity / area)	CFP (intensity / area)	mCherry (intensity / area)	YFP (intensity / area)	CFP (intensity / area)	mCherry (intensity / area)	YFP (intensity / area)	CFP (intensity / area)	mCherry (intensity / area)	YFP (intensity / area)	CFP (intensity / area)	M1 / Y1	M2 / Y2	C1 / Y1	C2 / Y2	C1 / M1	C2 / M2	M1 / CTRL	M2 / CTRL	C1 / CTRL	C2 / CTRL	C1/M1 CTRL	C2/M2 CTRL	M p-value	C p-value	C/M p-value	M % diff	C % diff	C/M % diff
CTRL	1				559.163	354.824	287.271	55.396	184.575	39.218	62.361	329.005	43.318		1.40995		0.69331	0.700901	0.491726		1		1	1.17539	0.82461	0.763169	0.00466758	0.00239878	3.23339	-33.516	-41.1907
CTRL	2	218.562	183.428	123.041	235.068	205.873	124.23	52.647	125.771	38.238	52.9	144.46	39.071	0.903834	0.885471	0.460052	0.415671	0.509001	0.469435	1.01026	0.989737	1.05068	0.949321	1.04044	0.959563
CLPX	1	635.433	451.07	275.561	488.404	341.64	176.712	54.238	195.075	38.667	62.248	495.179	42.93	1.2796	1.25911	0.520457	0.397827	0.406733	0.31596	0.90755	0.893014	0.750684	0.573808	0.68208	0.529855
CLPX	2	426.852	391.969	134.996	385.663	295.75	137.065	51.695	239.929	37.583	52.67	298.028	37.72	0.955865	1.12758	0.248347	0.33614	0.259814	0.298109	1.06842	1.26035	0.567182	0.767686	0.531081	0.609358
siRNA	BioRep	mCherry (intensity / area)	YFP (intensity / area)	CFP (intensity / area)	mCherry (intensity / area)	YFP (intensity / area)	CFP (intensity / area)	mCherry (intensity / area)	YFP (intensity / area)	CFP (intensity / area)	mCherry (intensity / area)	YFP (intensity / area)	CFP (intensity / area)	M1 / Y1	M2 / Y2	C1 / Y1	C2 / Y2	C1 / M1	C2 / M2	M1 / CTRL	M2 / CTRL	C1 / CTRL	C2 / CTRL	C1/M1 CTRL	C2/M2 CTRL	M p-value	C p-value	C/M p-value	M % diff	C % diff	C/M % diff
CTRL	1				559.163	354.824	287.271	55.396	184.575	39.218	62.361	329.005	43.318		1.40995		0.69331	0.700901	0.491726		1		1	1.17539	0.82461	0.0285167	0.00853149	0.0135328	-31.3937	-47.9212	-31.929
CTRL	2	218.562	183.428	123.041	235.068	205.873	124.23	52.647	125.771	38.238	52.9	144.46	39.071	0.903834	0.885471	0.460052	0.415671	0.509001	0.469435	1.01026	0.989737	1.05068	0.949321	1.04044	0.959563
HIST1H1E	1	275.927	270.965	116.765	276.918	241.534	126.081	56.606	157.495	41.819	58.232	190.751	40.899	0.806407	0.908771	0.278287	0.350766	0.345095	0.385979	0.571939	0.644541	0.401389	0.50593	0.578714	0.647275
HIST1H1E	2	240.013	214.555	116.451	181.522	233.916	81.376	57.564	179.415	41.419	60.577	191.258	42.689	0.843339	0.523485	0.34675	0.168103	0.411164	0.321123	0.942644	0.585127	0.791917	0.383918	0.840451	0.6564
siRNA	BioRep	mCherry (intensity / area)	YFP (intensity / area)	CFP (intensity / area)	mCherry (intensity / area)	YFP (intensity / area)	CFP (intensity / area)	mCherry (intensity / area)	YFP (intensity / area)	CFP (intensity / area)	mCherry (intensity / area)	YFP (intensity / area)	CFP (intensity / area)	M1 / Y1	M2 / Y2	C1 / Y1	C2 / Y2	C1 / M1	C2 / M2	M1 / CTRL	M2 / CTRL	C1 / CTRL	C2 / CTRL	C1/M1 CTRL	C2/M2 CTRL	M p-value	C p-value	C/M p-value	M % diff	C % diff	C/M % diff
CTRL	1				559.163	354.824	287.271	55.396	184.575	39.218	62.361	329.005	43.318		1.40995		0.69331	0.700901	0.491726		1		1	1.17539	0.82461	0.00995076	0.752933	0.0368172	16.9119	1.50237	-21.0168
CTRL	2	218.562	183.428	123.041	235.068	205.873	124.23	52.647	125.771	38.238	52.9	144.46	39.071	0.903834	0.885471	0.460052	0.415671	0.509001	0.469435	1.01026	0.989737	1.05068	0.949321	1.04044	0.959563
GBAS	1	379.515	204.908	193.22	230.413	107.218	121.48	60.602	72.901	43.162	55.457	72.145	41.075	1.56893	1.60779	0.737411	0.740188	0.47001	0.460378	1.11275	1.14031	1.06361	1.06762	0.788193	0.772039
GBAS	2	245.003	168.147	108.735	164.249	107.29	86.951	53.904	60.848	39.652	53.493	73.49	40.585	1.13772	1.03039	0.408074	0.436504	0.358677	0.42363	1.27169	1.15172	0.931971	0.996899	0.733163	0.865932
siRNA	BioRep	mCherry (intensity / area)	YFP (intensity / area)	CFP (intensity / area)	mCherry (intensity / area)	YFP (intensity / area)	CFP (intensity / area)	mCherry (intensity / area)	YFP (intensity / area)	CFP (intensity / area)	mCherry (intensity / area)	YFP (intensity / area)	CFP (intensity / area)	M1 / Y1	M2 / Y2	C1 / Y1	C2 / Y2	C1 / M1	C2 / M2	M1 / CTRL	M2 / CTRL	C1 / CTRL	C2 / CTRL	C1/M1 CTRL	C2/M2 CTRL	M p-value	C p-value	C/M p-value	M % diff	C % diff	C/M % diff
CTRL	1				559.163	354.824	287.271	55.396	184.575	39.218	62.361	329.005	43.318		1.40995		0.69331	0.700901	0.491726		1		1	1.17539	0.82461	0.569374	0.783211	0.370892	9.39072	10.5503	-13.2727
CTRL	2	218.562	183.428	123.041	235.068	205.873	124.23	52.647	125.771	38.238	52.9	144.46	39.071	0.903834	0.885471	0.460052	0.415671	0.509001	0.469435	1.01026	0.989737	1.05068	0.949321	1.04044	0.959563
LGALS9	1	322.256	239.882	138.88	452.317	202.136	316.503	56.66	125.599	40.218	55.851	85.067	39.703	1.10888	1.95938	0.412367	1.3681	0.371877	0.698231	0.786467	1.38968	0.594781	1.97329	0.623627	1.17091
LGALS9	2	333.348	305.755	145.953	358.896	276.459	173.971	65.092	148.789	44.563	57.056	217.702	41.057	0.890497	1.07727	0.337339	0.474432	0.378821	0.440401	0.995356	1.20413	0.770423	1.08352	0.774339	0.900213
siRNA	BioRep	mCherry (intensity / area)	YFP (intensity / area)	CFP (intensity / area)	mCherry (intensity / area)	YFP (intensity / area)	CFP (intensity / area)	mCherry (intensity / area)	YFP (intensity / area)	CFP (intensity / area)	mCherry (intensity / area)	YFP (intensity / area)	CFP (intensity / area)	M1 / Y1	M2 / Y2	C1 / Y1	C2 / Y2	C1 / M1	C2 / M2	M1 / CTRL	M2 / CTRL	C1 / CTRL	C2 / CTRL	C1/M1 CTRL	C2/M2 CTRL	M p-value	C p-value	C/M p-value	M % diff	C % diff	C/M % diff
CTRL	1				559.163	354.824	287.271	55.396	184.575	39.218	62.361	329.005	43.318		1.40995		0.69331	0.700901	0.491726		1		1	1.17539	0.82461	0.0359189	0.0203607	0.000123508	-24.8749	42.4492	73.4325
CTRL	2	218.562	183.428	123.041	235.068	205.873	124.23	52.647	125.771	38.238	52.9	144.46	39.071	0.903834	0.885471	0.460052	0.415671	0.509001	0.469435	1.01026	0.989737	1.05068	0.949321	1.04044	0.959563
GSDMA	1	127.527	83.582	114.318	134.063	83.638	117.595	54.818	51.987	40.522	54.694	50.159	40.003	0.870654	0.948217	0.886022	0.92461	1.01765	0.975103	0.617506	0.672518	1.27796	1.33362	1.70657	1.63522
GSDMA	2	187.227	154.581	159.363	127.932	106.607	104.845	54.691	57.168	41.41	55.965	65.761	42.252	0.853268	0.681043	0.760326	0.591087	0.891076	0.867914	0.953742	0.761238	1.73645	1.34994	1.82143	1.77408
siRNA	BioRep	mCherry (intensity / area)	YFP (intensity / area)	CFP (intensity / area)	mCherry (intensity / area)	YFP (intensity / area)	CFP (intensity / area)	mCherry (intensity / area)	YFP (intensity / area)	CFP (intensity / area)	mCherry (intensity / area)	YFP (intensity / area)	CFP (intensity / area)	M1 / Y1	M2 / Y2	C1 / Y1	C2 / Y2	C1 / M1	C2 / M2	M1 / CTRL	M2 / CTRL	C1 / CTRL	C2 / CTRL	C1/M1 CTRL	C2/M2 CTRL	M p-value	C p-value	C/M p-value	M % diff	C % diff	C/M % diff
CTRL	1				559.163	354.824	287.271	55.396	184.575	39.218	62.361	329.005	43.318		1.40995		0.69331	0.700901	0.491726		1		1	1.17539	0.82461	0.00791047	0.00262541	0.186532	-41.8443	-48.5655	-18.0575
CTRL	2	218.562	183.428	123.041	235.068	205.873	124.23	52.647	125.771	38.238	52.9	144.46	39.071	0.903834	0.885471	0.460052	0.415671	0.509001	0.469435	1.01026	0.989737	1.05068	0.949321	1.04044	0.959563
LOR	1	587.665	474.496	241.749	97.891	72.232	58.537	54.834	49.005	41.098	52.602	54.957	39.159	1.12529	0.611543	0.424915	0.254852	0.377604	0.416736	0.798108	0.433734	0.612879	0.367588	0.63323	0.698855
LOR	2	86.815	75.769	53.804	96.691	75.571	61.636	55.979	52.845	40.449	53.452	67.502	39.32	0.42365	0.555445	0.18371	0.287829	0.433636	0.518195	0.473535	0.62085	0.419561	0.65735	0.886386	1.05923
siRNA	BioRep	mCherry (intensity / area)	YFP (intensity / area)	CFP (intensity / area)	mCherry (intensity / area)	YFP (intensity / area)	CFP (intensity / area)	mCherry (intensity / area)	YFP (intensity / area)	CFP (intensity / area)	mCherry (intensity / area)	YFP (intensity / area)	CFP (intensity / area)	M1 / Y1	M2 / Y2	C1 / Y1	C2 / Y2	C1 / M1	C2 / M2	M1 / CTRL	M2 / CTRL	C1 / CTRL	C2 / CTRL	C1/M1 CTRL	C2/M2 CTRL	M p-value	C p-value	C/M p-value	M % diff	C % diff	C/M % diff
CTRL	1				559.163	354.824	287.271	55.396	184.575	39.218	62.361	329.005	43.318		1.40995		0.69331	0.700901	0.491726		1		1	1.17539	0.82461	0.0114204	0.000686314	0.00118039	-33.8327	-65.948	-54.3035
CTRL	2	218.562	183.428	123.041	235.068	205.873	124.23	52.647	125.771	38.238	52.9	144.46	39.071	0.903834	0.885471	0.460052	0.415671	0.509001	0.469435	1.01026	0.989737	1.05068	0.949321	1.04044	0.959563
AARS2	1	346.054	398.879	110.216	450.097	406.522	149.793	62.033	247.852	46.752	64.953	189.383	47.069	0.708388	0.951004	0.158709	0.25308	0.224042	0.266119	0.50242	0.674494	0.228914	0.365031	0.375712	0.446273
AARS2	2	208.086	186.678	91.882	250.893	336.073	82.619	66.141	286.8	49.073	64.982	638.448	47.345	0.763478	0.551462	0.233948	0.102388	0.306425	0.185667	0.853379	0.616398	0.534297	0.233837	0.626356	0.379518
siRNA	BioRep	mCherry (intensity / area)	YFP (intensity / area)	CFP (intensity / area)	mCherry (intensity / area)	YFP (intensity / area)	CFP (intensity / area)	mCherry (intensity / area)	YFP (intensity / area)	CFP (intensity / area)	mCherry (intensity / area)	YFP (intensity / area)	CFP (intensity / area)	M1 / Y1	M2 / Y2	C1 / Y1	C2 / Y2	C1 / M1	C2 / M2	M1 / CTRL	M2 / CTRL	C1 / CTRL	C2 / CTRL	C1/M1 CTRL	C2/M2 CTRL	M p-value	C p-value	C/M p-value	M % diff	C % diff	C/M % diff
CTRL	1				559.163	354.824	287.271	55.396	184.575	39.218	62.361	329.005	43.318		1.40995		0.69331	0.700901	0.491726		1		1	1.17539	0.82461	0.00968216	0.0249539	0.0838555	-30.1622	-36.5575	-18.7673
CTRL	2	218.562	183.428	123.041	235.068	205.873	124.23	52.647	125.771	38.238	52.9	144.46	39.071	0.903834	0.885471	0.460052	0.415671	0.509001	0.469435	1.01026	0.989737	1.05068	0.949321	1.04044	0.959563
H1F0	1	159.589	97.932	96.936	136.407	105.595	73.658	53.886	56.024	39.961	52.392	56.376	39.033	1.08698	0.78856	0.586519	0.32351	0.539587	0.410254	0.770934	0.559282	0.84597	0.466616	0.904871	0.687983
H1F0	2	121.88	116.003	66.547	151.947	128.402	84.1	56.184	71.903	42.155	56.549	102.11	42.217	0.564757	0.744385	0.210003	0.326428	0.371847	0.43852	0.631258	0.832038	0.479611	0.745504	0.760084	0.89637
siRNA	BioRep	mCherry (intensity / area)	YFP (intensity / area)	CFP (intensity / area)	mCherry (intensity / area)	YFP (intensity / area)	CFP (intensity / area)	mCherry (intensity / area)	YFP (intensity / area)	CFP (intensity / area)	mCherry (intensity / area)	YFP (intensity / area)	CFP (intensity / area)	M1 / Y1	M2 / Y2	C1 / Y1	C2 / Y2	C1 / M1	C2 / M2	M1 / CTRL	M2 / CTRL	C1 / CTRL	C2 / CTRL	C1/M1 CTRL	C2/M2 CTRL	M p-value	C p-value	C/M p-value	M % diff	C % diff	C/M % diff
CTRL	1				559.163	354.824	287.271	55.396	184.575	39.218	62.361	329.005	43.318		1.40995		0.69331	0.700901	0.491726		1		1	1.17539	0.82461	0.0108877	0.0216917	0.262751	33.7243	80.9531	26.0939
CTRL	2	218.562	183.428	123.041	235.068	205.873	124.23	52.647	125.771	38.238	52.9	144.46	39.071	0.903834	0.885471	0.460052	0.415671	0.509001	0.469435	1.01026	0.989737	1.05068	0.949321	1.04044	0.959563
NCLN	1	164.603	63.433	141.75	384.081	162.712	193.143	59.073	38.945	40.707	56.182	51.189	39.587	1.68643	2.00633	1.60174	0.940287	0.949778	0.468661	1.19609	1.42298	2.31028	1.35623	1.59275	0.78593
NCLN	2	303.127	186.143	170.675	118.057	57.738	88.167	53.208	39.518	38.927	55.276	65.227	38.638	1.33706	1.10525	0.708555	0.855321	0.529934	0.77387	1.49451	1.2354	1.61822	1.9534	1.08323	1.58185
siRNA	BioRep	mCherry (intensity / area)	YFP (intensity / area)	CFP (intensity / area)	mCherry (intensity / area)	YFP (intensity / area)	CFP (intensity / area)	mCherry (intensity / area)	YFP (intensity / area)	CFP (intensity / area)	mCherry (intensity / area)	YFP (intensity / area)	CFP (intensity / area)	M1 / Y1	M2 / Y2	C1 / Y1	C2 / Y2	C1 / M1	C2 / M2	M1 / CTRL	M2 / CTRL	C1 / CTRL	C2 / CTRL	C1/M1 CTRL	C2/M2 CTRL	M p-value	C p-value	C/M p-value	M % diff	C % diff	C/M % diff
CTRL	1				559.163	354.824	287.271	55.396	184.575	39.218	62.361	329.005	43.318		1.40995		0.69331	0.700901	0.491726		1		1	1.17539	0.82461	0.00236164	0.108121	0.425128	-44.6762	-30.904	12.1876
CTRL	2	218.562	183.428	123.041	235.068	205.873	124.23	52.647	125.771	38.238	52.9	144.46	39.071	0.903834	0.885471	0.460052	0.415671	0.509001	0.469435	1.01026	0.989737	1.05068	0.949321	1.04044	0.959563
ALDH4A1	1	342.576	459.54	194.281	348.912	428.727	212.785	56.034	120.903	40.888	52.578	72.232	39.751	0.627301	0.687165	0.335034	0.402273	0.534088	0.585411	0.44491	0.487368	0.483238	0.580222	0.895649	0.981716
ALDH4A1	2	187.925	273.964	115.223	232.434	264.249	165.128	55.7	131.372	40.04	57.232	148.686	40.919	0.47984	0.665917	0.272822	0.471709	0.568569	0.708359	0.536343	0.744331	0.623079	1.0773	1.1622	1.44794
siRNA	BioRep	mCherry (intensity / area)	YFP (intensity / area)	CFP (intensity / area)	mCherry (intensity / area)	YFP (intensity / area)	CFP (intensity / area)	mCherry (intensity / area)	YFP (intensity / area)	CFP (intensity / area)	mCherry (intensity / area)	YFP (intensity / area)	CFP (intensity / area)	M1 / Y1	M2 / Y2	C1 / Y1	C2 / Y2	C1 / M1	C2 / M2	M1 / CTRL	M2 / CTRL	C1 / CTRL	C2 / CTRL	C1/M1 CTRL	C2/M2 CTRL	M p-value	C p-value	C/M p-value	M % diff	C % diff	C/M % diff
CTRL	1				559.163	354.824	287.271	55.396	184.575	39.218	62.361	329.005	43.318		1.40995		0.69331	0.700901	0.491726		1		1	1.17539	0.82461	0.00273472	0.00051172	0.00212083	-49.6928	-67.0028	-41.8903
CTRL	2	218.562	183.428	123.041	235.068	205.873	124.23	52.647	125.771	38.238	52.9	144.46	39.071	0.903834	0.885471	0.460052	0.415671	0.509001	0.469435	1.01026	0.989737	1.05068	0.949321	1.04044	0.959563
HIST1H1B	1	180.351	127.924	85.761	115.188	94.539	58.504	57.235	85.167	42.077	55.069	65.466	40.104	0.970881	0.624462	0.349196	0.184194	0.359669	0.294964	0.688592	0.442896	0.503665	0.265673	0.603154	0.494646
HIST1H1B	2	119.602	130.532	61.286	82.699	92.444	48.053	57.154	83.589	41.512	53.553	66.293	39.475	0.492205	0.295806	0.15929	0.0817738	0.323626	0.276444	0.550163	0.330638	0.363792	0.186757	0.661517	0.565073
siRNA	BioRep	mCherry (intensity / area)	YFP (intensity / area)	CFP (intensity / area)	mCherry (intensity / area)	YFP (intensity / area)	CFP (intensity / area)	mCherry (intensity / area)	YFP (intensity / area)	CFP (intensity / area)	mCherry (intensity / area)	YFP (intensity / area)	CFP (intensity / area)	M1 / Y1	M2 / Y2	C1 / Y1	C2 / Y2	C1 / M1	C2 / M2	M1 / CTRL	M2 / CTRL	C1 / CTRL	C2 / CTRL	C1/M1 CTRL	C2/M2 CTRL	M p-value	C p-value	C/M p-value	M % diff	C % diff	C/M % diff
CTRL	1				559.163	354.824	287.271	55.396	184.575	39.218	62.361	329.005	43.318		1.40995		0.69331	0.700901	0.491726		1		1	1.17539	0.82461	0.158844	0.4959	0.566959	-20.8764	-15.8965	-7.50167
CTRL	2	218.562	183.428	123.041	235.068	205.873	124.23	52.647	125.771	38.238	52.9	144.46	39.071	0.903834	0.885471	0.460052	0.415671	0.509001	0.469435	1.01026	0.989737	1.05068	0.949321	1.04044	0.959563
PCCA	1	293.078	184.231	181.068	219.839	147.994	117.085	57.017	74.024	39.773	57.946	108.859	40.97	1.27881	1.09705	0.763696	0.518355	0.597193	0.472497	0.906989	0.77808	1.10152	0.747653	1.00147	0.792364
PCCA	2	118.717	132.577	65.998	235.546	200.139	145.424	64.386	78.343	47.598	54.982	92.636	41.893	0.445273	0.878699	0.160303	0.503043	0.360011	0.572486	0.497705	0.982168	0.366104	1.14886	0.735889	1.17021
siRNA	BioRep	mCherry (intensity / area)	YFP (intensity / area)	CFP (intensity / area)	mCherry (intensity / area)	YFP (intensity / area)	CFP (intensity / area)	mCherry (intensity / area)	YFP (intensity / area)	CFP (intensity / area)	mCherry (intensity / area)	YFP (intensity / area)	CFP (intensity / area)	M1 / Y1	M2 / Y2	C1 / Y1	C2 / Y2	C1 / M1	C2 / M2	M1 / CTRL	M2 / CTRL	C1 / CTRL	C2 / CTRL	C1/M1 CTRL	C2/M2 CTRL	M p-value	C p-value	C/M p-value	M % diff	C % diff	C/M % diff
CTRL	1				559.163	354.824	287.271	55.396	184.575	39.218	62.361	329.005	43.318		1.40995		0.69331	0.700901	0.491726		1		1	1.17539	0.82461	0.00111677	0.000676818	0.00231165	-47.0024	-66.9724	-45.6377
CTRL	2	218.562	183.428	123.041	235.068	205.873	124.23	52.647	125.771	38.238	52.9	144.46	39.071	0.903834	0.885471	0.460052	0.415671	0.509001	0.469435	1.01026	0.989737	1.05068	0.949321	1.04044	0.959563
ATP5F1	1	205.374	232.92	97.633	251.888	200.125	110.919	52.767	65.105	39.026	52.065	53.667	38.262	0.656698	0.996737	0.253259	0.361149	0.385655	0.362332	0.465759	0.70693	0.365289	0.520906	0.646732	0.607619
ATP5F1	2	164.874	269.421	66.484	98.359	106.373	47.989	52.589	77.576	39.236	52.53	75.818	38.167	0.416874	0.430556	0.103119	0.0873107	0.247363	0.202786	0.465962	0.481255	0.235506	0.199402	0.50563	0.41451
siRNA	BioRep	mCherry (intensity / area)	YFP (intensity / area)	CFP (intensity / area)	mCherry (intensity / area)	YFP (intensity / area)	CFP (intensity / area)	mCherry (intensity / area)	YFP (intensity / area)	CFP (intensity / area)	mCherry (intensity / area)	YFP (intensity / area)	CFP (intensity / area)	M1 / Y1	M2 / Y2	C1 / Y1	C2 / Y2	C1 / M1	C2 / M2	M1 / CTRL	M2 / CTRL	C1 / CTRL	C2 / CTRL	C1/M1 CTRL	C2/M2 CTRL	M p-value	C p-value	C/M p-value	M % diff	C % diff	C/M % diff
CTRL	1				559.163	354.824	287.271	55.396	184.575	39.218	62.361	329.005	43.318		1.40995		0.69331	0.700901	0.491726		1		1	1.17539	0.82461	0.0118227	0.00581833	0.0901335	-29.599	-36.4774	-17.8101
CTRL	2	218.562	183.428	123.041	235.068	205.873	124.23	52.647	125.771	38.238	52.9	144.46	39.071	0.903834	0.885471	0.460052	0.415671	0.509001	0.469435	1.01026	0.989737	1.05068	0.949321	1.04044	0.959563
HISTH1C	1	180.706	136.872	99.379	154.991	128.833	83.902	54.82	84.248	40.573	55.89	87.3	41.174	0.915826	0.773373	0.427447	0.333987	0.466733	0.431857	0.649545	0.548511	0.616531	0.481728	0.782698	0.724211
HISTH1C	2	193.647	182.566	105.316	180.482	173.593	91.494	60.25	97.101	43.207	55.935	92.035	40.837	0.742496	0.705037	0.346691	0.284988	0.466927	0.404218	0.829927	0.788057	0.791782	0.650864	0.954434	0.826252
siRNA	BioRep	mCherry (intensity / area)	YFP (intensity / area)	CFP (intensity / area)	mCherry (intensity / area)	YFP (intensity / area)	CFP (intensity / area)	mCherry (intensity / area)	YFP (intensity / area)	CFP (intensity / area)	mCherry (intensity / area)	YFP (intensity / area)	CFP (intensity / area)	M1 / Y1	M2 / Y2	C1 / Y1	C2 / Y2	C1 / M1	C2 / M2	M1 / CTRL	M2 / CTRL	C1 / CTRL	C2 / CTRL	C1/M1 CTRL	C2/M2 CTRL	M p-value	C p-value	C/M p-value	M % diff	C % diff	C/M % diff
CTRL	1				559.163	354.824	287.271	55.396	184.575	39.218	62.361	329.005	43.318		1.40995		0.69331	0.700901	0.491726		1		1	1.17539	0.82461	0.000411652	0.000551097	0.218368	-77.6274	-84.4258	-101.329
CTRL	2	218.562	183.428	123.041	235.068	205.873	124.23	52.647	125.771	38.238	52.9	144.46	39.071	0.903834	0.885471	0.460052	0.415671	0.509001	0.469435	1.01026	0.989737	1.05068	0.949321	1.04044	0.959563
PSMD14	1	77.844	69.745	49.278	63.071	64.171	42.031	66.921	59.336	48.363	54.96	49.563	41.265	0.242361	0.0332004	0.0640046	-0.0433685	0.264087	-1.30627	0.171894	0.0235472	0.0923174	-0.0625528	0.442866	-2.19057
PSMD14	2	81.175	84.634	52.643	79.695	81.605	49.15	58.315	52.853	42.071	50.531	38.638	38.076	0.31609	0.309687	0.148516	0.111225	0.469853	0.359152	0.353311	0.346153	0.339185	0.254018	0.960415	0.734135
siRNA	BioRep	mCherry (intensity / area)	YFP (intensity / area)	CFP (intensity / area)	mCherry (intensity / area)	YFP (intensity / area)	CFP (intensity / area)	mCherry (intensity / area)	YFP (intensity / area)	CFP (intensity / area)	mCherry (intensity / area)	YFP (intensity / area)	CFP (intensity / area)	M1 / Y1	M2 / Y2	C1 / Y1	C2 / Y2	C1 / M1	C2 / M2	M1 / CTRL	M2 / CTRL	C1 / CTRL	C2 / CTRL	C1/M1 CTRL	C2/M2 CTRL	M p-value	C p-value	C/M p-value	M % diff	C % diff	C/M % diff
CTRL	1				559.163	354.824	287.271	55.396	184.575	39.218	62.361	329.005	43.318		1.40995		0.69331	0.700901	0.491726		1		1	1.17539	0.82461	0.361405	0.259791	0.537403	-59.7787	-94.966	-11.989
CTRL	2	218.562	183.428	123.041	235.068	205.873	124.23	52.647	125.771	38.238	52.9	144.46	39.071	0.903834	0.885471	0.460052	0.415671	0.509001	0.469435	1.01026	0.989737	1.05068	0.949321	1.04044	0.959563
BCAP31	1	181.943	187.365	74.411	1445.48	889.738	741.234	893.385	480.484	591.614	50.922	196.314	35.995	-1.5489	1.09395	-1.27769	0.480399	0.824896	0.439142	-1.09855	0.775878	-1.84288	0.692907	1.38333	0.736428
BCAP31	2	234.401	221.729	100.691	182.761	135.156	82.143	52.596	68.806	37.372	61.828	121.623	41.592	0.799124	0.928919	0.276053	0.315643	0.345445	0.339796	0.893223	1.0383	0.630457	0.720873	0.706116	0.694569
siRNA	BioRep	mCherry (intensity / area)	YFP (intensity / area)	CFP (intensity / area)	mCherry (intensity / area)	YFP (intensity / area)	CFP (intensity / area)	mCherry (intensity / area)	YFP (intensity / area)	CFP (intensity / area)	mCherry (intensity / area)	YFP (intensity / area)	CFP (intensity / area)	M1 / Y1	M2 / Y2	C1 / Y1	C2 / Y2	C1 / M1	C2 / M2	M1 / CTRL	M2 / CTRL	C1 / CTRL	C2 / CTRL	C1/M1 CTRL	C2/M2 CTRL	M p-value	C p-value	C/M p-value	M % diff	C % diff	C/M % diff
CTRL	1				559.163	354.824	287.271	55.396	184.575	39.218	62.361	329.005	43.318		1.40995		0.69331	0.700901	0.491726		1		1	1.17539	0.82461	0.0294424	0.000150721	0.000160095	13.5231	-56.9573	-65.6388
CTRL	2	218.562	183.428	123.041	235.068	205.873	124.23	52.647	125.771	38.238	52.9	144.46	39.071	0.903834	0.885471	0.460052	0.415671	0.509001	0.469435	1.01026	0.989737	1.05068	0.949321	1.04044	0.959563
HIST1H1D	1	783.537	491.576	157.262	1067.3	611.011	268.304	79.118	765.821	51.962	61.231	782.548	39.753	1.45117	1.63192	0.226627	0.364063	0.156168	0.223089	1.02924	1.15743	0.326877	0.525109	0.261889	0.374113
HIST1H1D	2	472.858	405.198	113.008	487.641	399.045	121.552	54.822	233.577	39.285	58.875	252.152	42.214	1.02668	1.07956	0.178329	0.20249	0.173694	0.187567	1.14758	1.20668	0.407272	0.462451	0.355045	0.383402
siRNA	BioRep	mCherry (intensity / area)	YFP (intensity / area)	CFP (intensity / area)	mCherry (intensity / area)	YFP (intensity / area)	CFP (intensity / area)	mCherry (intensity / area)	YFP (intensity / area)	CFP (intensity / area)	mCherry (intensity / area)	YFP (intensity / area)	CFP (intensity / area)	M1 / Y1	M2 / Y2	C1 / Y1	C2 / Y2	C1 / M1	C2 / M2	M1 / CTRL	M2 / CTRL	C1 / CTRL	C2 / CTRL	C1/M1 CTRL	C2/M2 CTRL	M p-value	C p-value	C/M p-value	M % diff	C % diff	C/M % diff
CTRL	1				559.163	354.824	287.271	55.396	184.575	39.218	62.361	329.005	43.318		1.40995		0.69331	0.700901	0.491726		1		1	1.17539	0.82461	0.0020221	0.0656377	0.508501	-59.3271	-45.1872	15.9999
CTRL	2	218.562	183.428	123.041	235.068	205.873	124.23	52.647	125.771	38.238	52.9	144.46	39.071	0.903834	0.885471	0.460052	0.415671	0.509001	0.469435	1.01026	0.989737	1.05068	0.949321	1.04044	0.959563
RPL21	1	506.855	898.592	302.164	82.594	111.862	50.125	52.994	51.204	39.272	52.577	58.742	37.815	0.505312	0.266476	0.293371	0.103534	0.580573	0.38853	0.35839	0.188996	0.423145	0.149333	0.973604	0.651553
RPL21	2	129.981	158.652	98.565	125.311	132.204	87.881	63.274	70.453	44.912	52.3	63.84	38.256	0.455046	0.510756	0.359157	0.350194	0.789276	0.685638	0.508629	0.570899	0.820252	0.799781	1.61334	1.4015
siRNA	BioRep	mCherry (intensity / area)	YFP (intensity / area)	CFP (intensity / area)	mCherry (intensity / area)	YFP (intensity / area)	CFP (intensity / area)	mCherry (intensity / area)	YFP (intensity / area)	CFP (intensity / area)	mCherry (intensity / area)	YFP (intensity / area)	CFP (intensity / area)	M1 / Y1	M2 / Y2	C1 / Y1	C2 / Y2	C1 / M1	C2 / M2	M1 / CTRL	M2 / CTRL	C1 / CTRL	C2 / CTRL	C1/M1 CTRL	C2/M2 CTRL	M p-value	C p-value	C/M p-value	M % diff	C % diff	C/M % diff
CTRL	1	407.063	241.222	394.647	446.621	279.157	446.752	64.029	147.426	93.745	63.269	151.564	103.554	1.42364	1.37189	1.22708	1.24698	0.861926	0.90895	1.01851	0.981486	0.991956	1.00804	0.973446	1.02655	0.0280434	0.940633	0.0176334	-26.7516	0.32717	37.9889
CTRL	2	638.313	392.165	767.925	273.081	202.429	402.44	73.127	281.467	126.505	63.488	264.633	100.257	1.45348	1.01158	1.66905	1.42795	1.14831	1.4116	1.17927	0.820734	1.07785	0.922151	0.897148	1.10285
VWA8	1	250.684	186.201	316.12	304.406	232.212	356.022	60.089	163.49	86.809	60.459	220.635	86.885	1.0226	1.05133	1.23132	1.15918	1.2041	1.10258	0.7316	0.752152	0.995387	0.937068	1.35989	1.24524
VWA8	2	655.06	814.558	1377.55	545.203	450.233	850.446	70.692	218.805	109.494	64.231	215.35	98.238	0.721371	1.0611	1.56366	1.65821	2.16762	1.56273	0.585275	0.860909	1.00979	1.07085	1.69351	1.22092
siRNA	BioRep	mCherry (intensity / area)	YFP (intensity / area)	CFP (intensity / area)	mCherry (intensity / area)	YFP (intensity / area)	CFP (intensity / area)	mCherry (intensity / area)	YFP (intensity / area)	CFP (intensity / area)	mCherry (intensity / area)	YFP (intensity / area)	CFP (intensity / area)	M1 / Y1	M2 / Y2	C1 / Y1	C2 / Y2	C1 / M1	C2 / M2	M1 / CTRL	M2 / CTRL	C1 / CTRL	C2 / CTRL	C1/M1 CTRL	C2/M2 CTRL	M p-value	C p-value	C/M p-value	M % diff	C % diff	C/M % diff
CTRL	1	407.063	241.222	394.647	446.621	279.157	446.752	64.029	147.426	93.745	63.269	151.564	103.554	1.42364	1.37189	1.22708	1.24698	0.861926	0.90895	1.01851	0.981486	0.991956	1.00804	0.973446	1.02655	0.528351	0.0185628	0.0291755	5.26914	27.2079	19.4682
CTRL	2	638.313	392.165	767.925	273.081	202.429	402.44	73.127	281.467	126.505	63.488	264.633	100.257	1.45348	1.01158	1.66905	1.42795	1.14831	1.4116	1.17927	0.820734	1.07785	0.922151	0.897148	1.10285
HSD17B10	1	1005.41	632.976	1212.6	445.027	273.569	469.103	56.528	66.822	84.724	60.708	81.657	91.711	1.49578	1.41247	1.77634	1.39228	1.18756	0.985706	1.07012	1.01052	1.43597	1.12551	1.34121	1.11324
HSD17B10	2	964.921	643.795	1504.02	795.559	583.345	1169.43	75.006	271.015	131.43	70.148	513.666	130.578	1.38607	1.23937	2.13269	1.78012	1.53866	1.43631	1.12457	1.00555	1.37726	1.14958	1.20212	1.12215
siRNA	BioRep	mCherry (intensity / area)	YFP (intensity / area)	CFP (intensity / area)	mCherry (intensity / area)	YFP (intensity / area)	CFP (intensity / area)	mCherry (intensity / area)	YFP (intensity / area)	CFP (intensity / area)	mCherry (intensity / area)	YFP (intensity / area)	CFP (intensity / area)	M1 / Y1	M2 / Y2	C1 / Y1	C2 / Y2	C1 / M1	C2 / M2	M1 / CTRL	M2 / CTRL	C1 / CTRL	C2 / CTRL	C1/M1 CTRL	C2/M2 CTRL	M p-value	C p-value	C/M p-value	M % diff	C % diff	C/M % diff
CTRL	1	407.063	241.222	394.647	446.621	279.157	446.752	64.029	147.426	93.745	63.269	151.564	103.554	1.42364	1.37189	1.22708	1.24698	0.861926	0.90895	1.01851	0.981486	0.991956	1.00804	0.973446	1.02655	0.0556644	0.00549691	0.04662	-18.5983	-38.2508	-25.2483
CTRL	2	638.313	392.165	767.925	273.081	202.429	402.44	73.127	281.467	126.505	63.488	264.633	100.257	1.45348	1.01158	1.66905	1.42795	1.14831	1.4116	1.17927	0.820734	1.07785	0.922151	0.897148	1.10285
RBMX	1	548.452	396.98	509.151	465.08	338.567	408.567	70.555	291.074	106.629	83.334	299.689	121.895	1.18774	1.14641	0.994733	0.869267	0.837503	0.758253	0.849739	0.820171	0.804132	0.702707	0.945863	0.856359
RBMX	2	353.568	260.437	355.681	367.238	317.093	345.777	87.922	353.973	152.674	72.443	316.703	123.234	1.04972	0.905272	0.836006	0.655401	0.79641	0.723982	0.851676	0.734481	0.539881	0.423248	0.622216	0.56563
siRNA	BioRep	mCherry (intensity / area)	YFP (intensity / area)	CFP (intensity / area)	mCherry (intensity / area)	YFP (intensity / area)	CFP (intensity / area)	mCherry (intensity / area)	YFP (intensity / area)	CFP (intensity / area)	mCherry (intensity / area)	YFP (intensity / area)	CFP (intensity / area)	M1 / Y1	M2 / Y2	C1 / Y1	C2 / Y2	C1 / M1	C2 / M2	M1 / CTRL	M2 / CTRL	C1 / CTRL	C2 / CTRL	C1/M1 CTRL	C2/M2 CTRL	M p-value	C p-value	C/M p-value	M % diff	C % diff	C/M % diff
CTRL	1	407.063	241.222	394.647	446.621	279.157	446.752	64.029	147.426	93.745	63.269	151.564	103.554	1.42364	1.37189	1.22708	1.24698	0.861926	0.90895	1.01851	0.981486	0.991956	1.00804	0.973446	1.02655	0.0439319	0.00569192	0.00928042	-36.208	-59.1302	-42.3342
CTRL	2	638.313	392.165	767.925	273.081	202.429	402.44	73.127	281.467	126.505	63.488	264.633	100.257	1.45348	1.01158	1.66905	1.42795	1.14831	1.4116	1.17927	0.820734	1.07785	0.922151	0.897148	1.10285
MTHFD1L	1	525.912	352.11	454.043	208.983	182.056	200.364	94.984	317.474	166.003	92.533	544.261	159.268	1.22733	0.632907	0.827604	0.207236	0.674315	0.327435	0.878063	0.452799	0.669027	0.167527	0.761561	0.3698
MTHFD1L	2	428.679	356.781	454.902	163.703	188.799	162.56	75.286	228.825	125.626	63.957	179.383	96.602	1.00638	0.498316	0.963583	0.272491	0.957473	0.546824	0.816514	0.404302	0.622267	0.175971	0.748051	0.42722
siRNA	BioRep	mCherry (intensity / area)	YFP (intensity / area)	CFP (intensity / area)	mCherry (intensity / area)	YFP (intensity / area)	CFP (intensity / area)	mCherry (intensity / area)	YFP (intensity / area)	CFP (intensity / area)	mCherry (intensity / area)	YFP (intensity / area)	CFP (intensity / area)	M1 / Y1	M2 / Y2	C1 / Y1	C2 / Y2	C1 / M1	C2 / M2	M1 / CTRL	M2 / CTRL	C1 / CTRL	C2 / CTRL	C1/M1 CTRL	C2/M2 CTRL	M p-value	C p-value	C/M p-value	M % diff	C % diff	C/M % diff
CTRL	1	407.063	241.222	394.647	446.621	279.157	446.752	64.029	147.426	93.745	63.269	151.564	103.554	1.42364	1.37189	1.22708	1.24698	0.861926	0.90895	1.01851	0.981486	0.991956	1.00804	0.973446	1.02655	0.036292	0.114988	0.791168	-26.834	-26.5905	-2.89618
CTRL	2	638.313	392.165	767.925	273.081	202.429	402.44	73.127	281.467	126.505	63.488	264.633	100.257	1.45348	1.01158	1.66905	1.42795	1.14831	1.4116	1.17927	0.820734	1.07785	0.922151	0.897148	1.10285
AFG3L2	1	329.934	208.572	393.125	192.976	156.521	196.213	64.609	126.686	98.388	64.949	147.978	98.165	1.27129	0.81904	1.41365	0.625708	1.11199	0.763953	0.909514	0.585964	1.14278	0.505817	1.25586	0.862797
AFG3L2	2	255.917	229.326	300.875	218.534	171.502	264.19	61.415	172.604	85.741	61.479	142.6	82.697	0.848007	0.915949	0.944751	1.04938	1.11408	1.14568	0.68802	0.743143	0.610106	0.677675	0.870407	0.89509
siRNA	BioRep	mCherry (intensity / area)	YFP (intensity / area)	CFP (intensity / area)	mCherry (intensity / area)	YFP (intensity / area)	CFP (intensity / area)	mCherry (intensity / area)	YFP (intensity / area)	CFP (intensity / area)	mCherry (intensity / area)	YFP (intensity / area)	CFP (intensity / area)	M1 / Y1	M2 / Y2	C1 / Y1	C2 / Y2	C1 / M1	C2 / M2	M1 / CTRL	M2 / CTRL	C1 / CTRL	C2 / CTRL	C1/M1 CTRL	C2/M2 CTRL	M p-value	C p-value	C/M p-value	M % diff	C % diff	C/M % diff
CTRL	1	407.063	241.222	394.647	446.621	279.157	446.752	64.029	147.426	93.745	63.269	151.564	103.554	1.42364	1.37189	1.22708	1.24698	0.861926	0.90895	1.01851	0.981486	0.991956	1.00804	0.973446	1.02655	0.532229	0.0305452	0.00650723	-8.16153	23.4082	34.0826
CTRL	2	638.313	392.165	767.925	273.081	202.429	402.44	73.127	281.467	126.505	63.488	264.633	100.257	1.45348	1.01158	1.66905	1.42795	1.14831	1.4116	1.17927	0.820734	1.07785	0.922151	0.897148	1.10285
MUT	1	456.68	380.618	602.1	141.831	99.895	180.141	61.288	75.386	96.355	55.854	72.283	77.249	1.04595	0.833475	1.35385	0.934371	1.29436	1.12105	0.748305		1.09444		1.46183
MUT	2	578.822	458.47	975.965	324.902	190.715	510.335	70.244	181.504	114.693	62.45	148.282	91.769	1.11779	1.35571	1.90358	2.13462	1.70298	1.57454	0.906908	1.09994	1.2293	1.37851	1.3305	1.23015
siRNA	BioRep	mCherry (intensity / area)	YFP (intensity / area)	CFP (intensity / area)	mCherry (intensity / area)	YFP (intensity / area)	CFP (intensity / area)	mCherry (intensity / area)	YFP (intensity / area)	CFP (intensity / area)	mCherry (intensity / area)	YFP (intensity / area)	CFP (intensity / area)	M1 / Y1	M2 / Y2	C1 / Y1	C2 / Y2	C1 / M1	C2 / M2	M1 / CTRL	M2 / CTRL	C1 / CTRL	C2 / CTRL	C1/M1 CTRL	C2/M2 CTRL	M p-value	C p-value	C/M p-value	M % diff	C % diff	C/M % diff
CTRL	1	407.063	241.222	394.647	446.621	279.157	446.752	64.029	147.426	93.745	63.269	151.564	103.554	1.42364	1.37189	1.22708	1.24698	0.861926	0.90895	1.01851	0.981486	0.991956	1.00804	0.973446	1.02655	0.002399	0.0111304	0.233556	41.6205	64.809	14.7709
CTRL	2	638.313	392.165	767.925	273.081	202.429	402.44	73.127	281.467	126.505	63.488	264.633	100.257	1.45348	1.01158	1.66905	1.42795	1.14831	1.4116	1.17927	0.820734	1.07785	0.922151	0.897148	1.10285
DHX30	1	677.146	300.95	848.816	694.556	295.113	843.91	65.807	197.715	102.435	78.955	210.83	151.503	2.00952	2.10826	2.39856	2.42938	1.1936	1.15231	1.43767	1.50831	1.93897	1.96389	1.34803	1.30141
DHX30	2	890.389	498.322	1132.13	819.354	433.877	1066.67	71.747	320.142	121.747	78.62	304.745	140.643	1.6359	1.71516	2.00862	2.15608	1.22784	1.25707	1.32727	1.39158	1.29714	1.39237	0.959279	0.982118
siRNA	BioRep	mCherry (intensity / area)	YFP (intensity / area)	CFP (intensity / area)	mCherry (intensity / area)	YFP (intensity / area)	CFP (intensity / area)	mCherry (intensity / area)	YFP (intensity / area)	CFP (intensity / area)	mCherry (intensity / area)	YFP (intensity / area)	CFP (intensity / area)	M1 / Y1	M2 / Y2	C1 / Y1	C2 / Y2	C1 / M1	C2 / M2	M1 / CTRL	M2 / CTRL	C1 / CTRL	C2 / CTRL	C1/M1 CTRL	C2/M2 CTRL	M p-value	C p-value	C/M p-value	M % diff	C % diff	C/M % diff
CTRL	1	407.063	241.222	394.647	446.621	279.157	446.752	64.029	147.426	93.745	63.269	151.564	103.554	1.42364	1.37189	1.22708	1.24698	0.861926	0.90895	1.01851	0.981486	0.991956	1.00804	0.973446	1.02655	0.215665	0.884393	0.481738	-12.2002	-2.0165	10.5527
CTRL	2	638.313	392.165	767.925	273.081	202.429	402.44	73.127	281.467	126.505	63.488	264.633	100.257	1.45348	1.01158	1.66905	1.42795	1.14831	1.4116	1.17927	0.820734	1.07785	0.922151	0.897148	1.10285
OAT	1	340.504	201.29	467.006	274.857	172.76	313.513	120.319	106.244	185.305	61.67	266.301	94.934	1.23955	1.06427	1.62396	1.00367	1.31012	0.943061	0.88681	0.761405	1.31279	0.811355	1.47962	1.06508
OAT	2	524.28	374.149	702.108	436.826	349.589	496.164	60.706	125.754	88.054	67.116	236.833	98.442	1.23044	1.06672	1.62732	1.15254	1.32255	1.08045	0.998304	0.865473	1.0509	0.744295	1.03327	0.844129
siRNA	BioRep	mCherry (intensity / area)	YFP (intensity / area)	CFP (intensity / area)	mCherry (intensity / area)	YFP (intensity / area)	CFP (intensity / area)	mCherry (intensity / area)	YFP (intensity / area)	CFP (intensity / area)	mCherry (intensity / area)	YFP (intensity / area)	CFP (intensity / area)	M1 / Y1	M2 / Y2	C1 / Y1	C2 / Y2	C1 / M1	C2 / M2	M1 / CTRL	M2 / CTRL	C1 / CTRL	C2 / CTRL	C1/M1 CTRL	C2/M2 CTRL	M p-value	C p-value	C/M p-value	M % diff	C % diff	C/M % diff
CTRL	1	407.063	241.222	394.647	446.621	279.157	446.752	64.029	147.426	93.745	63.269	151.564	103.554	1.42364	1.37189	1.22708	1.24698	0.861926	0.90895	1.01851	0.981486	0.991956	1.00804	0.973446	1.02655	0.00473211	1.51394e-06	4.46901e-05	-35.6833	-77.23	-64.6097
CTRL	2	638.313	392.165	767.925	273.081	202.429	402.44	73.127	281.467	126.505	63.488	264.633	100.257	1.45348	1.01158	1.66905	1.42795	1.14831	1.4116	1.17927	0.820734	1.07785	0.922151	0.897148	1.10285
SPEN	1	215.59	156.08	166.073	307.934	264.115	208.055	74.448	247.326	119.118	72.937	241.293	111.973	0.909133	0.886892	0.323728	0.350262	0.356084	0.394932	0.650419	0.634507	0.261699	0.283149	0.402156	0.44603
SPEN	2	276.164	220.1	195.649	335.199	374.515	237.739	82.671	378.362	149.67	73.303	351.181	115.671	0.900395	0.686787	0.286136	0.280546	0.317789	0.40849	0.730524	0.557216	0.184782	0.181172	0.248281	0.319143
siRNA	BioRep	mCherry (intensity / area)	YFP (intensity / area)	CFP (intensity / area)	mCherry (intensity / area)	YFP (intensity / area)	CFP (intensity / area)	mCherry (intensity / area)	YFP (intensity / area)	CFP (intensity / area)	mCherry (intensity / area)	YFP (intensity / area)	CFP (intensity / area)	M1 / Y1	M2 / Y2	C1 / Y1	C2 / Y2	C1 / M1	C2 / M2	M1 / CTRL	M2 / CTRL	C1 / CTRL	C2 / CTRL	C1/M1 CTRL	C2/M2 CTRL	M p-value	C p-value	C/M p-value	M % diff	C % diff	C/M % diff
CTRL	1	407.063	241.222	394.647	446.621	279.157	446.752	64.029	147.426	93.745	63.269	151.564	103.554	1.42364	1.37189	1.22708	1.24698	0.861926	0.90895	1.01851	0.981486	0.991956	1.00804	0.973446	1.02655	0.000321763	0.000346746	0.415324	67.4321	58.9239	-5.73239
CTRL	2	638.313	392.165	767.925	273.081	202.429	402.44	73.127	281.467	126.505	63.488	264.633	100.257	1.45348	1.01158	1.66905	1.42795	1.14831	1.4116	1.17927	0.820734	1.07785	0.922151	0.897148	1.10285
DLD	1	441.341	169.446	478.465	550.146	199.657	526.244	81.927	213.497	150.964	81.354	203.231	150.768	2.1228	2.34655	1.93335	1.88011	0.910755	0.801224	1.51871	1.67879	1.5629	1.51987	1.02859	0.90489
DLD	2	946.929	407.655	1252.95	729.446	304.473	805.758	64.374	122.87	93.701	76.817	173.544	132.841	2.14969	2.1639	2.7957	2.27438	1.30051	1.05105	1.74413	1.75566	1.80542	1.46876	1.01606	0.821163
siRNA	BioRep	mCherry (intensity / area)	YFP (intensity / area)	CFP (intensity / area)	mCherry (intensity / area)	YFP (intensity / area)	CFP (intensity / area)	mCherry (intensity / area)	YFP (intensity / area)	CFP (intensity / area)	mCherry (intensity / area)	YFP (intensity / area)	CFP (intensity / area)	M1 / Y1	M2 / Y2	C1 / Y1	C2 / Y2	C1 / M1	C2 / M2	M1 / CTRL	M2 / CTRL	C1 / CTRL	C2 / CTRL	C1/M1 CTRL	C2/M2 CTRL	M p-value	C p-value	C/M p-value	M % diff	C % diff	C/M % diff
CTRL	1	407.063	241.222	394.647	446.621	279.157	446.752	64.029	147.426	93.745	63.269	151.564	103.554	1.42364	1.37189	1.22708	1.24698	0.861926	0.90895	1.01851	0.981486	0.991956	1.00804	0.973446	1.02655	0.0527195	0.123862	0.239603	19.8227	10.8746	-8.18973
CTRL	2	638.313	392.165	767.925	273.081	202.429	402.44	73.127	281.467	126.505	63.488	264.633	100.257	1.45348	1.01158	1.66905	1.42795	1.14831	1.4116	1.17927	0.820734	1.07785	0.922151	0.897148	1.10285
PRRC2C	1	683.067	379.868	673.029	574.998	322.442	535.2	63.755	138.261	113.013	63.241	259.705	105.072	1.63101	1.58633	1.48469	1.32166	0.910288	0.833152	1.16687	1.13491	1.20021	1.06841	1.02807	0.940949
PRRC2C	2	499.433	296.362	558.474	495.311	267.126	598.42	72.992	281.309	128.349	58.799	328.732	88.02	1.46286	1.60754	1.51939	1.83522	1.03864	1.14163	1.18688	1.30426	0.9812	1.18516	0.811465	0.891931
siRNA	BioRep	mCherry (intensity / area)	YFP (intensity / area)	CFP (intensity / area)	mCherry (intensity / area)	YFP (intensity / area)	CFP (intensity / area)	mCherry (intensity / area)	YFP (intensity / area)	CFP (intensity / area)	mCherry (intensity / area)	YFP (intensity / area)	CFP (intensity / area)	M1 / Y1	M2 / Y2	C1 / Y1	C2 / Y2	C1 / M1	C2 / M2	M1 / CTRL	M2 / CTRL	C1 / CTRL	C2 / CTRL	C1/M1 CTRL	C2/M2 CTRL	M p-value	C p-value	C/M p-value	M % diff	C % diff	C/M % diff
CTRL	1	407.063	241.222	394.647	446.621	279.157	446.752	64.029	147.426	93.745	63.269	151.564	103.554	1.42364	1.37189	1.22708	1.24698	0.861926	0.90895	1.01851	0.981486	0.991956	1.00804	0.973446	1.02655	0.236769	0.0764964	0.688596	10.9662	15.6308	3.87529
CTRL	2	638.313	392.165	767.925	273.081	202.429	402.44	73.127	281.467	126.505	63.488	264.633	100.257	1.45348	1.01158	1.66905	1.42795	1.14831	1.4116	1.17927	0.820734	1.07785	0.922151	0.897148	1.10285
TOMM40	1	722.35	425.902	834.199	718.648	458.202	751.836	67.581	268.63	104.762	80.073	337.732	141.03	1.5227	1.40729	1.67011	1.37263	1.0968	0.975371	1.08939	1.00681	1.3501	1.10962	1.23871	1.10157
TOMM40	2	793.058	499.275	945.878	511.876	302.251	648.511	77.305	490.516	136.982	71.362	446.41	121.632	1.43954	1.44761	1.63551	1.71779	1.13614	1.18664	1.16795	1.1745	1.05619	1.10932	0.887638	0.927091
siRNA	BioRep	mCherry (intensity / area)	YFP (intensity / area)	CFP (intensity / area)	mCherry (intensity / area)	YFP (intensity / area)	CFP (intensity / area)	mCherry (intensity / area)	YFP (intensity / area)	CFP (intensity / area)	mCherry (intensity / area)	YFP (intensity / area)	CFP (intensity / area)	M1 / Y1	M2 / Y2	C1 / Y1	C2 / Y2	C1 / M1	C2 / M2	M1 / CTRL	M2 / CTRL	C1 / CTRL	C2 / CTRL	C1/M1 CTRL	C2/M2 CTRL	M p-value	C p-value	C/M p-value	M % diff	C % diff	C/M % diff
CTRL	1	407.063	241.222	394.647	446.621	279.157	446.752	64.029	147.426	93.745	63.269	151.564	103.554	1.42364	1.37189	1.22708	1.24698	0.861926	0.90895	1.01851	0.981486	0.991956	1.00804	0.973446	1.02655	0.00550298	0.000983803	0.0142721	46.3532	95.9949	32.8463
CTRL	2	638.313	392.165	767.925	273.081	202.429	402.44	73.127	281.467	126.505	63.488	264.633	100.257	1.45348	1.01158	1.66905	1.42795	1.14831	1.4116	1.17927	0.820734	1.07785	0.922151	0.897148	1.10285
GCDH	1	623.765	321.214	749.147	515.554	213.234	708.533	70.211	268.345	113.968	75.212	233.016	103.583	1.71553	2.07679	1.9936	2.81267	1.16209	1.35434	1.22734	1.48579	1.6116	2.27374	1.31244	1.52957
GCDH	2	1017.33	485.273	1771.92	940.412	444.382	1364.56	76.054	295.302	138.189	82.262	383.257	139.518	1.93328	1.93809	3.36526	2.75822	1.74069	1.42316	1.56855	1.57245	2.17323	1.78122	1.35996	1.11188
siRNA	BioRep	mCherry (intensity / area)	YFP (intensity / area)	CFP (intensity / area)	mCherry (intensity / area)	YFP (intensity / area)	CFP (intensity / area)	mCherry (intensity / area)	YFP (intensity / area)	CFP (intensity / area)	mCherry (intensity / area)	YFP (intensity / area)	CFP (intensity / area)	M1 / Y1	M2 / Y2	C1 / Y1	C2 / Y2	C1 / M1	C2 / M2	M1 / CTRL	M2 / CTRL	C1 / CTRL	C2 / CTRL	C1/M1 CTRL	C2/M2 CTRL	M p-value	C p-value	C/M p-value	M % diff	C % diff	C/M % diff
CTRL	1	407.063	241.222	394.647	446.621	279.157	446.752	64.029	147.426	93.745	63.269	151.564	103.554	1.42364	1.37189	1.22708	1.24698	0.861926	0.90895	1.01851	0.981486	0.991956	1.00804	0.973446	1.02655	0.00489422	0.306128	0.0829326	-34.3572	-10.8672	35.6482
CTRL	2	638.313	392.165	767.925	273.081	202.429	402.44	73.127	281.467	126.505	63.488	264.633	100.257	1.45348	1.01158	1.66905	1.42795	1.14831	1.4116	1.17927	0.820734	1.07785	0.922151	0.897148	1.10285
RBM15B	1	303.07	277.245	468.684	316.393	288.603	438.683	66.153	124.138	99.291	63.933	181.656	110.098	0.858544	0.87092	1.31288	1.15726	1.52919	1.32878	0.614226	0.62308	1.06132	0.935517	1.72705	1.5007
RBM15B	2	426.628	377.353	693.652	429.416	437.006	572.283	85.785	406.359	150.596	77.006	401.321	140.583	0.914879	0.796375	1.45239	0.976402	1.58752	1.22606	0.742276	0.646129	0.93793	0.630546	1.24029	0.95789
siRNA	BioRep	mCherry (intensity / area)	YFP (intensity / area)	CFP (intensity / area)	mCherry (intensity / area)	YFP (intensity / area)	CFP (intensity / area)	mCherry (intensity / area)	YFP (intensity / area)	CFP (intensity / area)	mCherry (intensity / area)	YFP (intensity / area)	CFP (intensity / area)	M1 / Y1	M2 / Y2	C1 / Y1	C2 / Y2	C1 / M1	C2 / M2	M1 / CTRL	M2 / CTRL	C1 / CTRL	C2 / CTRL	C1/M1 CTRL	C2/M2 CTRL	M p-value	C p-value	C/M p-value	M % diff	C % diff	C/M % diff
CTRL	1	407.063	241.222	394.647	446.621	279.157	446.752	64.029	147.426	93.745	63.269	151.564	103.554	1.42364	1.37189	1.22708	1.24698	0.861926	0.90895	1.01851	0.981486	0.991956	1.00804	0.973446	1.02655	0.000898495	1.69659e-05	0.00488401	-63.1527	-75.2594	-33.7508
CTRL	2	638.313	392.165	767.925	273.081	202.429	402.44	73.127	281.467	126.505	63.488	264.633	100.257	1.45348	1.01158	1.66905	1.42795	1.14831	1.4116	1.17927	0.820734	1.07785	0.922151	0.897148	1.10285
VARS	1	148.872	149.338	145.316	148.11	164.495	149.952	60.005	133.888	83.51	65.42	152.749	102.933	0.576943	0.51915	0.348836	0.344877	0.604629	0.664311	0.412761	0.371414	0.281996	0.278795	0.682858	0.750262
VARS	2	155.167	162.483	167.208	159.319	240.057	166.442	63.75	165.509	98.995	64.79	169.699	99.005	0.559425	0.395943	0.419785	0.280942	0.750388	0.70955		0.321244		0.181428		0.554354
siRNA	BioRep	mCherry (intensity / area)	YFP (intensity / area)	CFP (intensity / area)	mCherry (intensity / area)	YFP (intensity / area)	CFP (intensity / area)	mCherry (intensity / area)	YFP (intensity / area)	CFP (intensity / area)	mCherry (intensity / area)	YFP (intensity / area)	CFP (intensity / area)	M1 / Y1	M2 / Y2	C1 / Y1	C2 / Y2	C1 / M1	C2 / M2	M1 / CTRL	M2 / CTRL	C1 / CTRL	C2 / CTRL	C1/M1 CTRL	C2/M2 CTRL	M p-value	C p-value	C/M p-value	M % diff	C % diff	C/M % diff
CTRL	1	407.063	241.222	394.647	446.621	279.157	446.752	64.029	147.426	93.745	63.269	151.564	103.554	1.42364	1.37189	1.22708	1.24698	0.861926	0.90895	1.01851	0.981486	0.991956	1.00804	0.973446	1.02655	0.979101	0.00318146	0.000421086	0.317564	-51.0307	-52.9694
CTRL	2	638.313	392.165	767.925	273.081	202.429	402.44	73.127	281.467	126.505	63.488	264.633	100.257	1.45348	1.01158	1.66905	1.42795	1.14831	1.4116	1.17927	0.820734	1.07785	0.922151	0.897148	1.10285
HADHA	1	567.619	352.522	367.558	711.4	363.664	459.408	77.053	439.271	131.254	67.631	184.562	114.266	1.40495	1.75728	0.694419	0.925712	0.494265	0.526788	1.00514	1.2572	0.561362	0.748336	0.558215	0.594946
HADHA	2	331.954	251.438	209.058	423.703	339.525	258.873	60.983	265.693	90.334	57.698	230.014	79.783	1.08422	1.07315	0.493161	0.511934	0.454855	0.477037	0.879666	0.87069	0.318476	0.3306	0.355367	0.372698
siRNA	BioRep	mCherry (intensity / area)	YFP (intensity / area)	CFP (intensity / area)	mCherry (intensity / area)	YFP (intensity / area)	CFP (intensity / area)	mCherry (intensity / area)	YFP (intensity / area)	CFP (intensity / area)	mCherry (intensity / area)	YFP (intensity / area)	CFP (intensity / area)	M1 / Y1	M2 / Y2	C1 / Y1	C2 / Y2	C1 / M1	C2 / M2	M1 / CTRL	M2 / CTRL	C1 / CTRL	C2 / CTRL	C1/M1 CTRL	C2/M2 CTRL	M p-value	C p-value	C/M p-value	M % diff	C % diff	C/M % diff
CTRL	1	407.063	241.222	394.647	446.621	279.157	446.752	64.029	147.426	93.745	63.269	151.564	103.554	1.42364	1.37189	1.22708	1.24698	0.861926	0.90895	1.01851	0.981486	0.991956	1.00804	0.973446	1.02655	0.14771	0.000787903	9.9183e-05	-17.2235	52.4399	84.27
CTRL	2	638.313	392.165	767.925	273.081	202.429	402.44	73.127	281.467	126.505	63.488	264.633	100.257	1.45348	1.01158	1.66905	1.42795	1.14831	1.4116	1.17927	0.820734	1.07785	0.922151	0.897148	1.10285
RBM4	1	343.119	243.906	579.116	324.716	244.671	560.211	80.978	136.501	125.539	85.396	307.522	135.778	1.06571	0.987158	1.83865	1.75563	1.72529	1.77847	0.762435	0.70624	1.48635	1.41924	1.94851	2.00858
RBM4	2	562.602	489.048	1231.04	856.455	608.133	1793.66	80.98	384.096	139.79	75.12	539.078	144.198	0.990807	1.27999	2.22688	2.71597	2.24754	2.12186	0.803878	1.0385	1.43808	1.75393	1.75595	1.65776
siRNA	BioRep	mCherry (intensity / area)	YFP (intensity / area)	CFP (intensity / area)	mCherry (intensity / area)	YFP (intensity / area)	CFP (intensity / area)	mCherry (intensity / area)	YFP (intensity / area)	CFP (intensity / area)	mCherry (intensity / area)	YFP (intensity / area)	CFP (intensity / area)	M1 / Y1	M2 / Y2	C1 / Y1	C2 / Y2	C1 / M1	C2 / M2	M1 / CTRL	M2 / CTRL	C1 / CTRL	C2 / CTRL	C1/M1 CTRL	C2/M2 CTRL	M p-value	C p-value	C/M p-value	M % diff	C % diff	C/M % diff
CTRL	1	407.063	241.222	394.647	446.621	279.157	446.752	64.029	147.426	93.745	63.269	151.564	103.554	1.42364	1.37189	1.22708	1.24698	0.861926	0.90895	1.01851	0.981486	0.991956	1.00804	0.973446	1.02655	#DIV/0!	#DIV/0!	#DIV/0!	#DIV/0!	#DIV/0!	#DIV/0!
CTRL	2	638.313	392.165	767.925	273.081	202.429	402.44	73.127	281.467	126.505	63.488	264.633	100.257	1.45348	1.01158	1.66905	1.42795	1.14831	1.4116	1.17927	0.820734	1.07785	0.922151	0.897148	1.10285
VCP	1	93.11	68.543	107.553	117.551	99.282	130.023	58.881	67.212	76.817	57.748	59.244	75.138	0.507645	0.596649	0.460667	0.544364	0.907459	0.912368
VCP	2	104.999	89.366	125.601	126.728	98.775	163.988	56.824	70.046	88.21	56.282	73.366	76.039	0.542108	0.710453	0.486499	0.828788	0.897422	1.16656
siRNA	BioRep	mCherry (intensity / area)	YFP (intensity / area)	CFP (intensity / area)	mCherry (intensity / area)	YFP (intensity / area)	CFP (intensity / area)	mCherry (intensity / area)	YFP (intensity / area)	CFP (intensity / area)	mCherry (intensity / area)	YFP (intensity / area)	CFP (intensity / area)	M1 / Y1	M2 / Y2	C1 / Y1	C2 / Y2	C1 / M1	C2 / M2	M1 / CTRL	M2 / CTRL	C1 / CTRL	C2 / CTRL	C1/M1 CTRL	C2/M2 CTRL	M p-value	C p-value	C/M p-value	M % diff	C % diff	C/M % diff
CTRL	1	407.063	241.222	394.647	446.621	279.157	446.752	64.029	147.426	93.745	63.269	151.564	103.554	1.42364	1.37189	1.22708	1.24698	0.861926	0.90895	1.01851	0.981486	0.991956	1.00804	0.973446	1.02655	0.586328	0.891084	0.355796	-6.65668	1.69259	8.10694
CTRL	2	638.313	392.165	767.925	273.081	202.429	402.44	73.127	281.467	126.505	63.488	264.633	100.257	1.45348	1.01158	1.66905	1.42795	1.14831	1.4116	1.17927	0.820734	1.07785	0.922151	0.897148	1.10285
HINT2	1	348.085	229.688	414.83	351.579	261.818	393.154	70.456	337.246	112.857	76.119	357.219	125.711	1.19639	1.06292	1.28673	1.04603	1.0755	0.984112	0.855934	0.760442	1.04018	0.845602	1.21466	1.11144
HINT2	2	622.414	387.439	895.609	495.064	376.233	592.667	64.757	293.094	109.3	54.585	100.492	84.694	1.45247	1.15724	2.06126	1.31745	1.41914	1.13844	1.17844	0.938915	1.33113	0.850793	1.10874	0.889438
siRNA	BioRep	mCherry (intensity / area)	YFP (intensity / area)	CFP (intensity / area)	mCherry (intensity / area)	YFP (intensity / area)	CFP (intensity / area)	mCherry (intensity / area)	YFP (intensity / area)	CFP (intensity / area)	mCherry (intensity / area)	YFP (intensity / area)	CFP (intensity / area)	M1 / Y1	M2 / Y2	C1 / Y1	C2 / Y2	C1 / M1	C2 / M2	M1 / CTRL	M2 / CTRL	C1 / CTRL	C2 / CTRL	C1/M1 CTRL	C2/M2 CTRL	M p-value	C p-value	C/M p-value	M % diff	C % diff	C/M % diff
CTRL	1	407.063	241.222	394.647	446.621	279.157	446.752	64.029	147.426	93.745	63.269	151.564	103.554	1.42364	1.37189	1.22708	1.24698	0.861926	0.90895	1.01851	0.981486	0.991956	1.00804	0.973446	1.02655	0.566952	0.0497804	0.0426498	5.02694	38.6435	29.7386
CTRL	2	638.313	392.165	767.925	273.081	202.429	402.44	73.127	281.467	126.505	63.488	264.633	100.257	1.45348	1.01158	1.66905	1.42795	1.14831	1.4116	1.17927	0.820734	1.07785	0.922151	0.897148	1.10285
RBMS1	1	1204.36	753.301	1601.72	1240.88	784.05	1440.57	70.005	596.422	113.59	78.306	712.406	135.526	1.50034	1.48807	1.96093	1.67848	1.30699	1.12795	1.07338	1.06461	1.58519	1.35686	1.47609	1.27389
RBMS1	2	1167.65	788.466	2150.1	1288.64	1043.88	1699.52	77.718	634.706	143.32	77.315	179.85	147.039	1.3826	1.16022	2.54281	1.489	1.83915	1.28338	1.12176	0.941329	1.64211	0.961577	1.43688	1.00268
siRNA	BioRep	mCherry (intensity / area)	YFP (intensity / area)	CFP (intensity / area)	mCherry (intensity / area)	YFP (intensity / area)	CFP (intensity / area)	mCherry (intensity / area)	YFP (intensity / area)	CFP (intensity / area)	mCherry (intensity / area)	YFP (intensity / area)	CFP (intensity / area)	M1 / Y1	M2 / Y2	C1 / Y1	C2 / Y2	C1 / M1	C2 / M2	M1 / CTRL	M2 / CTRL	C1 / CTRL	C2 / CTRL	C1/M1 CTRL	C2/M2 CTRL	M p-value	C p-value	C/M p-value	M % diff	C % diff	C/M % diff
CTRL	1	514.696	195.172	427.049				56.154	66.889	84.259	57.632	101.008	84.11	2.34564	#DIV/0!	1.75673	#DIV/0!	0.748935	1.4797	1		1		1		3.82266e-05	0.00072063	0.371136	-72.8858	-68.1072	19.4776
CTRL	2	144.175	83.13	133.638	123.661	59.184	106.338	52.923	39.994	71.619	52.251	46.435	69.067	1.10174	1.2009	0.761398	0.608188	0.691084	0.506444	0.956939	1.04306	1.11187	0.888134	1.15418	0.845816
METTL14	1	176.74	163.537	152.36				52.874	31.417	68.262	51.82	29.579	66.618	0.760641	#DIV/0!	0.519271	#DIV/0!	0.682675	1.28833	0.324279		0.295589		0.911528
METTL14	2	72.814	80.688	81.655	68.308	59.408	82.008	50.018	54.984	65.751	51.881	44.348	66.981	0.270976	0.292191	0.189483	0.263298	0.699261	0.901115	0.235361	0.253788	0.276701	0.384493	1.16784	1.50496
siRNA	BioRep	mCherry (intensity / area)	YFP (intensity / area)	CFP (intensity / area)	mCherry (intensity / area)	YFP (intensity / area)	CFP (intensity / area)	mCherry (intensity / area)	YFP (intensity / area)	CFP (intensity / area)	mCherry (intensity / area)	YFP (intensity / area)	CFP (intensity / area)	M1 / Y1	M2 / Y2	C1 / Y1	C2 / Y2	C1 / M1	C2 / M2	M1 / CTRL	M2 / CTRL	C1 / CTRL	C2 / CTRL	C1/M1 CTRL	C2/M2 CTRL	M p-value	C p-value	C/M p-value	M % diff	C % diff	C/M % diff
CTRL	1	514.696	195.172	427.049				56.154	66.889	84.259	57.632	101.008	84.11	2.34564		1.75673		0.748935		1		1		1		0.154032	0.0375467	0.240602	-20.4268	-34.8731	-17.8373
CTRL	2	144.175	83.13	133.638	123.661	59.184	106.338	52.923	39.994	71.619	52.251	46.435	69.067	1.10174	1.2009	0.761398	0.608188	0.691084	0.506444	0.956939	1.04306	1.11187	0.888134	1.15418	0.845816
METTL3	1	306.505	161.514	207.688	186.133	174.606	164.695	54.307	218.323	73.138	57.832	77.704	77.404	1.55055	0.744897	0.819848	0.512147	0.528747	0.687541	0.661035		0.46669		0.705999
METTL3	2	128.107	64.47	103.931	94.264	51.775	95.187	52.583	57.899	68.758	51.959	71.097	70.921	1.1763	0.811067	0.528796	0.48957	0.449542	0.603613	1.02169	0.704466	0.772199	0.714917	0.750784	1.0081
siRNA	BioRep	mCherry (intensity / area)	YFP (intensity / area)	CFP (intensity / area)	mCherry (intensity / area)	YFP (intensity / area)	CFP (intensity / area)	mCherry (intensity / area)	YFP (intensity / area)	CFP (intensity / area)	mCherry (intensity / area)	YFP (intensity / area)	CFP (intensity / area)	M1 / Y1	M2 / Y2	C1 / Y1	C2 / Y2	C1 / M1	C2 / M2	M1 / CTRL	M2 / CTRL	C1 / CTRL	C2 / CTRL	C1/M1 CTRL	C2/M2 CTRL	M p-value	C p-value	C/M p-value	M % diff	C % diff	C/M % diff
CTRL	1	862.496	206.315	313.318	1013.49	280.725	340.153	242.924	205.693	119.585	276.853	306.45	121.371	2.92081	2.68448	0.934687	0.782527	0.320009	0.291501	1.04216	0.957837	1.08861	0.911391	1.04662	0.953381	0.00887157	0.322142	0.0250579	-24.4767	-5.14707	22.676
CTRL	2	308.202	140.405	163.22	506.59	224.016	296.034	56.549	145.246	43.253	61.984	301.529	44.713	1.77298	1.99684	0.849236	1.12515	0.478988	0.563465	0.940619	1.05938	0.860255	1.13975	0.918963	1.08104
CTRL	3	144.175	83.13	133.638	123.661	59.184	106.338	52.923	39.994	71.619	52.251	46.435	69.067	1.10174	1.2009	0.761398	0.608188	0.691084	0.506444	0.956939	1.04306	1.11187	0.888134	1.15418	0.845816
RBM12B	1	637.988	218.273	269.601	619.31	308.031	230.825	125.096	259.808	76.077	161.22	269.258	108.853	2.26702	1.54579	0.811534	0.449176	0.357973	0.290579	0.808887	0.551548	0.945175	0.523144	1.17078	0.950367
RBM12B	2	1059.06	562.406	824.541	690.343	473.331	469.442	53.448	147.015	41.454	55.363	226.169	41.754	1.78635	1.34354	1.39212	0.903888	0.77931	0.672767	0.947712	0.712786	1.41018	0.915615	1.49515	1.29074
RBM12B	3	110.698	111.445	140.505	57.055	34.948	75.966	53.846	48.521	71.016	52.524	55.328	71.709	0.516066	0.110736	0.620418	0.131724	1.20221	1.18953	0.448238	0.0961816	0.905994	0.192356	2.00781	1.98665
siRNA	BioRep	mCherry (intensity / area)	YFP (intensity / area)	CFP (intensity / area)	mCherry (intensity / area)	YFP (intensity / area)	CFP (intensity / area)	mCherry (intensity / area)	YFP (intensity / area)	CFP (intensity / area)	mCherry (intensity / area)	YFP (intensity / area)	CFP (intensity / area)	M1 / Y1	M2 / Y2	C1 / Y1	C2 / Y2	C1 / M1	C2 / M2	M1 / CTRL	M2 / CTRL	C1 / CTRL	C2 / CTRL	C1/M1 CTRL	C2/M2 CTRL	M p-value	C p-value	C/M p-value	M % diff	C % diff	C/M % diff
CTRL	1	514.696	195.172	427.049				56.154	66.889	84.259	57.632	101.008	84.11	2.34564		1.75673		0.748935		1		1		1		0.00193919	0.0127587	0.516385	-42.2259	-49.4665	-12.2039
CTRL	2	144.175	83.13	133.638	123.661	59.184	106.338	52.923	39.994	71.619	52.251	46.435	69.067	1.10174	1.2009	0.761398	0.608188	0.691084	0.506444	0.956939	1.04306	1.11187	0.888134	1.15418	0.845816
SLIRP	1	391.834	219.52	342.964	165.305	97.135	159.302	59.24	142.186	82.312	54.975	135.982	75.263	1.52481	1.11389	1.20343	0.828893	0.789231	0.744144	0.650062	0.474876	0.685039	0.471838	1.0538	0.993603
SLIRP	2	108.056	70.671	103.988	63.277	47.07	72.733	59.647	80.172	83.879	57.479	128.002	89.337	0.70033		0.245928	-0.294774	0.351161	-2.94336	0.608283		0.359128		0.586476
siRNA	BioRep	mCherry (intensity / area)	YFP (intensity / area)	CFP (intensity / area)	mCherry (intensity / area)	YFP (intensity / area)	CFP (intensity / area)	mCherry (intensity / area)	YFP (intensity / area)	CFP (intensity / area)	mCherry (intensity / area)	YFP (intensity / area)	CFP (intensity / area)	M1 / Y1	M2 / Y2	C1 / Y1	C2 / Y2	C1 / M1	C2 / M2	M1 / CTRL	M2 / CTRL	C1 / CTRL	C2 / CTRL	C1/M1 CTRL	C2/M2 CTRL	M p-value	C p-value	C/M p-value	M % diff	C % diff	C/M % diff
CTRL	1	514.696	195.172	427.049				56.154	66.889	84.259	57.632	101.008	84.11	2.34564		1.75673		0.748935		1		1		1		1.82617e-06	0.00313463	0.558115	-60.8075	-69.9005	-19.0079
CTRL	2	144.175	83.13	133.638	123.661	59.184	106.338	52.923	39.994	71.619	52.251	46.435	69.067	1.10174	1.2009	0.761398	0.608188	0.691084	0.506444	0.956939	1.04306	1.11187	0.888134	1.15418	0.845816
DOCK2	1	168.854	126.186	141.003	146.567	93.845	113.422	52.478	91.284	72.66	54.928	93.003	80.219	0.91255	0.989547	0.511653	0.394081	0.560686	0.398244	0.389041	0.421867	0.291253	0.224326	0.748644	0.531747
DOCK2	2	170.261	269.498	174.863	66.02	46.688	70.851	52.171	46.049	67.291	53.534	68.67	67.609	0.435656		0.398567	0.0728453	0.914866	0.258287	0.378397	0.378397	0.582026	0.106376	1.52792	0.431368
siRNA	BioRep	mCherry (intensity / area)	YFP (intensity / area)	CFP (intensity / area)	mCherry (intensity / area)	YFP (intensity / area)	CFP (intensity / area)	mCherry (intensity / area)	YFP (intensity / area)	CFP (intensity / area)	mCherry (intensity / area)	YFP (intensity / area)	CFP (intensity / area)	M1 / Y1	M2 / Y2	C1 / Y1	C2 / Y2	C1 / M1	C2 / M2	M1 / CTRL	M2 / CTRL	C1 / CTRL	C2 / CTRL	C1/M1 CTRL	C2/M2 CTRL	M p-value	C p-value	C/M p-value	M % diff	C % diff	C/M % diff
CTRL	1	514.696	195.172	427.049				56.154	66.889	84.259	57.632	101.008	84.11	2.34564		1.75673		0.748935		1		1		1		0.000597582	0.00628533	0.296849	-57.0222	-47.0409	38.0751
CTRL	2	144.175	83.13	133.638	123.661	59.184	106.338	52.923	39.994	71.619	52.251	46.435	69.067	1.10174	1.2009	0.761398	0.608188	0.691084	0.506444	0.956939	1.04306	1.11187	0.888134	1.15418	0.845816
DICER1	1	153.303	67.243	138.302	105.806	56.464	112.727	53.389	39.801	71.873	60.613	43.989	81.007	1.43215	0.864356	0.919977	0.642657	0.642375	0.74351	0.610558	0.368495	0.523687	0.365826	0.857718	0.992757
DICER1	2	70.292	46.507	86.153	62.904	37.297	75.662	51.548	30.198	62.157	49.41	32.973	63.67	0.426022	0.333137	0.499699	0.34181	1.17294	1.02604	0.370029	0.370029	0.729708	0.499144	1.95894	1.71359
siRNA	BioRep	mCherry (intensity / area)	YFP (intensity / area)	CFP (intensity / area)	mCherry (intensity / area)	YFP (intensity / area)	CFP (intensity / area)	mCherry (intensity / area)	YFP (intensity / area)	CFP (intensity / area)	mCherry (intensity / area)	YFP (intensity / area)	CFP (intensity / area)	M1 / Y1	M2 / Y2	C1 / Y1	C2 / Y2	C1 / M1	C2 / M2	M1 / CTRL	M2 / CTRL	C1 / CTRL	C2 / CTRL	C1/M1 CTRL	C2/M2 CTRL	M p-value	C p-value	C/M p-value	M % diff	C % diff	C/M % diff
CTRL	1	514.696	195.172	427.049				56.154	66.889	84.259	57.632	101.008	84.11	2.34564		1.75673		0.748935		1		1		1		0.000605847	0.00025672	0.789187	-55.5719	-59.1738	-6.06064
CTRL	2	144.175	83.13	133.638	123.661	59.184	106.338	52.923	39.994	71.619	52.251	46.435	69.067	1.10174	1.2009	0.761398	0.608188	0.691084	0.506444	0.956939	1.04306	1.11187	0.888134	1.15418	0.845816
eRF1	1	292.048	179.897	202.931	263.469	156.233	189.145	61.923	40.281	95.107	63.159	40.333	86.284	1.27577	1.28608	0.623888	0.630145	0.489029	0.489974	0.54389	0.548285	0.355141	0.358704	0.652966	0.654228
eRF1	2	69.083	40.17	82.938	74.19	44.551	84.405	56.463	34.636	71.633	50.025	39.36	69.041	0.394299	0.470158	0.313692	0.315773	0.795568	0.671632	0.342475	0.342475	0.458083	0.461122	1.32868	1.1217
siRNA	BioRep	mCherry (intensity / area)	YFP (intensity / area)	CFP (intensity / area)	mCherry (intensity / area)	YFP (intensity / area)	CFP (intensity / area)	mCherry (intensity / area)	YFP (intensity / area)	CFP (intensity / area)	mCherry (intensity / area)	YFP (intensity / area)	CFP (intensity / area)	M1 / Y1	M2 / Y2	C1 / Y1	C2 / Y2	C1 / M1	C2 / M2	M1 / CTRL	M2 / CTRL	C1 / CTRL	C2 / CTRL	C1/M1 CTRL	C2/M2 CTRL	M p-value	C p-value	C/M p-value	M % diff	C % diff	C/M % diff
CTRL	1	514.696	195.172	427.049				56.154	66.889	84.259	57.632	101.008	84.11	2.34564		1.75673		0.748935		1		1		1		0.00124571	0.0326268	0.649128	-62.1483	-52.7991	-7.13409
CTRL	2	144.175	83.13	133.638	123.661	59.184	106.338	52.923	39.994	71.619	52.251	46.435	69.067	1.10174	1.2009	0.761398	0.608188	0.691084	0.506444	0.956939	1.04306	1.11187	0.888134	1.15418	0.845816
FTO	1	213.673	113.204	177.242	170.214	205.684	172.958	52.976	37.458	69.335	53.397	51.322	74.302	1.41768	0.568967	0.93127	0.491723	0.656899	0.864237	0.604388	0.242564	0.530116	0.279908	0.877112	1.15396
FTO	2	69.334	40.089	79.682	97.439	45.619	100.469	52.231	36.726	70.517	55.646	42.488	76.789	0.384033	0.953561	0.15039	0.587825	0.391608	0.616453	0.333558	0.333558	0.219614	0.858399	0.654027	1.02954
siRNA	BioRep	mCherry (intensity / area)	YFP (intensity / area)	CFP (intensity / area)	mCherry (intensity / area)	YFP (intensity / area)	CFP (intensity / area)	mCherry (intensity / area)	YFP (intensity / area)	CFP (intensity / area)	mCherry (intensity / area)	YFP (intensity / area)	CFP (intensity / area)	M1 / Y1	M2 / Y2	C1 / Y1	C2 / Y2	C1 / M1	C2 / M2	M1 / CTRL	M2 / CTRL	C1 / CTRL	C2 / CTRL	C1/M1 CTRL	C2/M2 CTRL	M p-value	C p-value	C/M p-value	M % diff	C % diff	C/M % diff
CTRL	1	514.696	195.172	427.049				56.154	66.889	84.259	57.632	101.008	84.11	2.34564		1.75673		0.748935		1		1		1		0.00572602	0.00164025	0.350554	-59.5191	-71.6984	-10.5411
CTRL	2	144.175	83.13	133.638	123.661	59.184	106.338	52.923	39.994	71.619	52.251	46.435	69.067	1.10174	1.2009	0.761398	0.608188	0.691084	0.506444	0.956939	1.04306	1.11187	0.888134	1.15418	0.845816
NCBP1	1	68.801	39	77.603	61.58	36.424	77.204	52.914	31.838	66.606	49.985	29.894	63.87	0.44491	0.278127	0.317051	0.32852	0.712619	1.18119	0.189676		0.180478		0.95151
NCBP1	2	78.95	41.086	81.463	65.55	34.692	75.79	56.29	35.524	68.557	53.136	33.739	70.994	0.589909	0.312377	0.284464	0.173368	0.482217	0.554997	0.512376	0.512376	0.415402	0.253169	0.805355	0.926904
siRNA	BioRep	mCherry (intensity / area)	YFP (intensity / area)	CFP (intensity / area)	mCherry (intensity / area)	YFP (intensity / area)	CFP (intensity / area)	mCherry (intensity / area)	YFP (intensity / area)	CFP (intensity / area)	mCherry (intensity / area)	YFP (intensity / area)	CFP (intensity / area)	M1 / Y1	M2 / Y2	C1 / Y1	C2 / Y2	C1 / M1	C2 / M2	M1 / CTRL	M2 / CTRL	C1 / CTRL	C2 / CTRL	C1/M1 CTRL	C2/M2 CTRL	M p-value	C p-value	C/M p-value	M % diff	C % diff	C/M % diff
CTRL	1	514.696	195.172	427.049				56.154	66.889	84.259	57.632	101.008	84.11	2.34564		1.75673		0.748935		1		1		1		0.047682	0.917221	0.000286324	-41.1017	3.19468	73.7391
CTRL	2	144.175	83.13	133.638	123.661	59.184	106.338	52.923	39.994	71.619	52.251	46.435	69.067	1.10174	1.2009	0.761398	0.608188	0.691084	0.506444	0.956939	1.04306	1.11187	0.888134	1.15418	0.845816
UPF2	1	279.664	214.698	368.572	159.368	126.662	221.513	66.35	122.656	93.104	69.613	260.737	114.163	0.985955	0.721499	1.23401	0.930662	1.25158	1.2899	0.420335	0.307592	0.702445	0.529769	1.67115	1.72231
UPF2	2	129.269	82.154	148.902	128.41	82.259	151.153	51.555	32.393	71.753	52.997	37.758	65.296	0.937179	0.92554	0.978376	1.00449	1.04396	1.0853	0.814003	0.814003	1.42872	1.46685	1.74352	1.81257
siRNA	BioRep	mCherry (intensity / area)	YFP (intensity / area)	CFP (intensity / area)	mCherry (intensity / area)	YFP (intensity / area)	CFP (intensity / area)	mCherry (intensity / area)	YFP (intensity / area)	CFP (intensity / area)	mCherry (intensity / area)	YFP (intensity / area)	CFP (intensity / area)	M1 / Y1	M2 / Y2	C1 / Y1	C2 / Y2	C1 / M1	C2 / M2	M1 / CTRL	M2 / CTRL	C1 / CTRL	C2 / CTRL	C1/M1 CTRL	C2/M2 CTRL	M p-value	C p-value	C/M p-value	M % diff	C % diff	C/M % diff
CTRL	1	514.696	195.172	427.049				56.154	66.889	84.259	57.632	101.008	84.11	2.34564		1.75673		0.748935		1		1		1		0.063331	0.0772374	0.234791	-30.251	-26.4037	14.8212
CTRL	2	144.175	83.13	133.638	123.661	59.184	106.338	52.923	39.994	71.619	52.251	46.435	69.067	1.10174	1.2009	0.761398	0.608188	0.691084	0.506444	0.956939	1.04306	1.11187	0.888134	1.15418	0.845816
UPF3A	1	224.093	138.944	206.976	208.396	127.707	221.879	54.06	44.914	71.162	56.984	64.614	83.465	1.21323	1.19707	0.9332	1.13201	0.769186	0.945651	0.517228	0.510338	0.531214	0.644384	1.02704	1.26266
UPF3A	2	134.508	77.441	120.2	161.094	137.1	151.525	52.704	61.505	68.851	59.178	76.054	74.315	1.01454	0.76698	0.627794	0.583093	0.618797	0.760245	0.881196	0.881196	0.916765	0.851488	1.03346	1.26969
siRNA	BioRep	mCherry (intensity / area)	YFP (intensity / area)	CFP (intensity / area)	mCherry (intensity / area)	YFP (intensity / area)	CFP (intensity / area)	mCherry (intensity / area)	YFP (intensity / area)	CFP (intensity / area)	mCherry (intensity / area)	YFP (intensity / area)	CFP (intensity / area)	M1 / Y1	M2 / Y2	C1 / Y1	C2 / Y2	C1 / M1	C2 / M2	M1 / CTRL	M2 / CTRL	C1 / CTRL	C2 / CTRL	C1/M1 CTRL	C2/M2 CTRL	M p-value	C p-value	C/M p-value	M % diff	C % diff	C/M % diff
CTRL	1	514.696	195.172	427.049				56.154	66.889	84.259	57.632	101.008	84.11	2.34564		1.75673		0.748935		1		1		1		0.000968266	0.0528285	0.0731444	-64.4351	-47.5477	58.6852
CTRL	2	144.175	83.13	133.638	123.661	59.184	106.338	52.923	39.994	71.619	52.251	46.435	69.067	1.10174	1.2009	0.761398	0.608188	0.691084	0.506444	0.956939	1.04306	1.11187	0.888134	1.15418	0.845816
UPF3B	1	117.215	101.538	139.92	78.102	47.433	95.963	56.251	35.965	77.037	56.766	46.154	78.765	0.59787	0.455242	0.610796	0.38079	1.02162	0.836455	0.254886	0.19408	0.347689	0.216761	1.3641	1.11686
UPF3B	2	99.877	80.504	124.694	70.246	43.388	93.913	53.804	31.992	70.275	55.708	51.19	79.892	0.560481	0.357011	0.616249	0.433979	1.0995	1.21559	0.486816	0.486816	0.899905	0.633738	1.83628	2.03017
siRNA	Plate	M1	Y1	C1	M2	Y2	C2	M3	Y3	C3	M4	Y4	C4	M1 / Y1	M2 / Y2	C1 / Y1	C2 / Y2	C1 / M1	C2 / M2	M1 / CTRL	M2 / CTRL	C1 / CTRL	C2 / CTRL	C1/M1 CTRL	C2/M2 CTRL	M p-value	C p-value	C/M p-value	M % diff	C % diff	C/M % diff
CTRL	1	397.995	338.08	87.711	332.134	255.913	85.34	59.865	323.489	27.198	76.646	360.904	29.989	0.97533	1.03113	0.174862	0.221741	0.179285	0.215048	0.972192	1.02781	0.881799	1.1182	0.909309	1.09069	0.146309	0.0693181	0.0412324	-16.6971	-35.3315	-23.7338
CTRL	2	206.165	208.453	61.484	263.457	237.936	81.792	58.284	293.595	29.168	56.233	250.016	29.036	0.714341	0.866613	0.155344	0.221446	0.217465	0.25553	0.903683	1.09632	0.824566	1.17543	0.919523	1.08048
TARS2	1	232.685	255.403	52.832	193.849	202.991	45.998	53.664	190.922	26.419	54.625	178.595	27.141	0.699054	0.68823	0.102004	0.0946741	0.145916	0.137562	0.696805	0.686016	0.514385	0.477424	0.740067	0.697693
TARS2	2	387.555	476.089	77.436	198.126	164.751	60.976	60.765	188.483	28.527	55.693	193.241	28.334	0.691732	0.849142	0.102933	0.197544	0.148805	0.232639	0.875082	1.07421	0.54637	1.04856	0.629204	0.983683
siRNA	Plate	M1	Y1	C1	M2	Y2	C2	M3	Y3	C3	M4	Y4	C4	M1 / Y1	M2 / Y2	C1 / Y1	C2 / Y2	C1 / M1	C2 / M2	M1 / CTRL	M2 / CTRL	C1 / CTRL	C2 / CTRL	C1/M1 CTRL	C2/M2 CTRL	M p-value	C p-value	C/M p-value	M % diff	C % diff	C/M % diff
CTRL	1	397.995	338.08	87.711	332.134	255.913	85.34	59.865	323.489	27.198	76.646	360.904	29.989	0.97533	1.03113	0.174862	0.221741	0.179285	0.215048	0.972192	1.02781	0.881799	1.1182	0.909309	1.09069	0.000127137	0.00100715	0.0902054	-45.7392	-56.246	-18.4103
CTRL	2	206.165	208.453	61.484	263.457	237.936	81.792	58.284	293.595	29.168	56.233	250.016	29.036	0.714341	0.866613	0.155344	0.221446	0.217465	0.25553	0.903683	1.09632	0.824566	1.17543	0.919523	1.08048
BCAS2	1	375.842	633.168	90.049	128.954	138.962	37.977	59.526	175.511	27.262	61.675	293.37	26.845	0.49788	0.491886	0.0994926	0.0786078	0.199833	0.159809	0.496278	0.490304	0.501723	0.396405	1.01352	0.810527
BCAS2	2	218.956	329.474	58.918	166.087	256.691	44.654	54.299	231.019	26.822	54.139	355.156	28.659	0.5	0.435808	0.0946281	0.0658905	0.189256	0.151192	0.632529	0.551323	0.502285	0.349746	0.800245	0.639294
siRNA	Plate	M1	Y1	C1	M2	Y2	C2	M3	Y3	C3	M4	Y4	C4	M1 / Y1	M2 / Y2	C1 / Y1	C2 / Y2	C1 / M1	C2 / M2	M1 / CTRL	M2 / CTRL	C1 / CTRL	C2 / CTRL	C1/M1 CTRL	C2/M2 CTRL	M p-value	C p-value	C/M p-value	M % diff	C % diff	C/M % diff
CTRL	1	397.995	338.08	87.711	332.134	255.913	85.34	59.865	323.489	27.198	76.646	360.904	29.989	0.97533	1.03113	0.174862	0.221741	0.179285	0.215048	0.972192	1.02781	0.881799	1.1182	0.909309	1.09069	0.000567517	0.169048	0.00536814	-32.3095	-15.3688	25.5316
CTRL	2	206.165	208.453	61.484	263.457	237.936	81.792	58.284	293.595	29.168	56.233	250.016	29.036	0.714341	0.866613	0.155344	0.221446	0.217465	0.25553	0.903683	1.09632	0.824566	1.17543	0.919523	1.08048
ACSF3	1	286.353	355.029	79.225	272.515	309.948	78.09	56.431	267.822	26.237	55.013	458.373	25.267	0.649612	0.69945	0.150616	0.168861	0.231855	0.241419	0.647522	0.697199	0.759528	0.851533	1.17594	1.22444
ACSF3	2	302.751	498.739	104.793	241.785	314.562	87.553	56.263	311.273	29.597	58.833	338.558	29.893	0.491646	0.585694	0.150475	0.183773	0.306065	0.31377	0.621961	0.740937	0.798722	0.975465	1.29415	1.32673
siRNA	Plate	M1	Y1	C1	M2	Y2	C2	M3	Y3	C3	M4	Y4	C4	M1 / Y1	M2 / Y2	C1 / Y1	C2 / Y2	C1 / M1	C2 / M2	M1 / CTRL	M2 / CTRL	C1 / CTRL	C2 / CTRL	C1/M1 CTRL	C2/M2 CTRL	M p-value	C p-value	C/M p-value	M % diff	C % diff	C/M % diff
CTRL	1	397.995	338.08	87.711	332.134	255.913	85.34	59.865	323.489	27.198	76.646	360.904	29.989	0.97533	1.03113	0.174862	0.221741	0.179285	0.215048	0.972192	1.02781	0.881799	1.1182	0.909309	1.09069	0.0157489	0.0218128	0.0703361	27.2742	76.724	39.6402
CTRL	2	206.165	208.453	61.484	263.457	237.936	81.792	58.284	293.595	29.168	56.233	250.016	29.036	0.714341	0.866613	0.155344	0.221446	0.217465	0.25553	0.903683	1.09632	0.824566	1.17543	0.919523	1.08048
MRPS9	1	303.692	173.663	82.235	303.692	197.126	93.034	56.345	162.791	26.556	48.261	155.179	24.872	1.44757	1.27527	0.325464	0.341507	0.224835	0.267792	1.44291	1.27117	1.64125	1.72216	1.14033	1.3582
MRPS9	2	376.865	368.675	120.07	176.146	117.227	83.483	60.217	203.561	30.924	54.69	159.646	29.509	0.866377	1.0125	0.24372	0.454388	0.28131	0.448777	1.09602	1.28087	1.29366	2.41188	1.18948	1.8976
siRNA	Plate	M1	Y1	C1	M2	Y2	C2	M3	Y3	C3	M4	Y4	C4	M1 / Y1	M2 / Y2	C1 / Y1	C2 / Y2	C1 / M1	C2 / M2	M1 / CTRL	M2 / CTRL	C1 / CTRL	C2 / CTRL	C1/M1 CTRL	C2/M2 CTRL	M p-value	C p-value	C/M p-value	M % diff	C % diff	C/M % diff
CTRL	1	397.995	338.08	87.711	332.134	255.913	85.34	59.865	323.489	27.198	76.646	360.904	29.989	0.97533	1.03113	0.174862	0.221741	0.179285	0.215048	0.972192	1.02781	0.881799	1.1182	0.909309	1.09069	0.00374111	0.00248763	0.0174933	-59.8167	-70.5274	-26.6254
CTRL	2	206.165	208.453	61.484	263.457	237.936	81.792	58.284	293.595	29.168	56.233	250.016	29.036	0.714341	0.866613	0.155344	0.221446	0.217465	0.25553	0.903683	1.09632	0.824566	1.17543	0.919523	1.08048
EPRS	1	108.807	150.821	33.138	83.429	91.367	30.492	51.802	109.234	26.006	50.76	111.341	25.781	0.381419	0.351856	0.0480338	0.05033	0.125934	0.143042	0.380192	0.350724	0.242225	0.253805	0.63872	0.725486
EPRS	2	106.602	193.294	35.999	75.639	86.048	33.205	49.373	73.106	26.519	49.664	100.833	26.493	0.29532	0.303557	0.0491117	0.0778519	0.1663	0.256465	0.373597	0.384018	0.260684	0.413237	0.703179	1.08443
siRNA	Plate	M1	Y1	C1	M2	Y2	C2	M3	Y3	C3	M4	Y4	C4	M1 / Y1	M2 / Y2	C1 / Y1	C2 / Y2	C1 / M1	C2 / M2	M1 / CTRL	M2 / CTRL	C1 / CTRL	C2 / CTRL	C1/M1 CTRL	C2/M2 CTRL	M p-value	C p-value	C/M p-value	M % diff	C % diff	C/M % diff
CTRL	1	397.995	338.08	87.711	332.134	255.913	85.34	59.865	323.489	27.198	76.646	360.904	29.989	0.97533	1.03113	0.174862	0.221741	0.179285	0.215048	0.972192	1.02781	0.881799	1.1182	0.909309	1.09069	0.000190263	0.00690678	0.0980608	-52.296	-44.6201	16.6785
CTRL	2	206.165	208.453	61.484	263.457	237.936	81.792	58.284	293.595	29.168	56.233	250.016	29.036	0.714341	0.866613	0.155344	0.221446	0.217465	0.25553	0.903683	1.09632	0.824566	1.17543	0.919523	1.08048
HNRNPA2B1	1	132.909	168.138	41.218	92.865	113	35.781	55.595	153.083	26.423	52.949	127.872	26.249	0.467693	0.341531	0.0885106	0.0835841	0.189249	0.244734	0.466188	0.340432	0.446343	0.421499	0.959845	1.24125
HNRNPA2B1	2	164.543	251.585	58.682	108.376	131.13	42.982	55.475	145.785	27.353	49.649	95.185	25.608	0.445102	0.425639	0.127995	0.125841	0.287562	0.295652	0.56308	0.538458	0.679394	0.667962	1.21592	1.25012
siRNA	Plate	M1	Y1	C1	M2	Y2	C2	M3	Y3	C3	M4	Y4	C4	M1 / Y1	M2 / Y2	C1 / Y1	C2 / Y2	C1 / M1	C2 / M2	M1 / CTRL	M2 / CTRL	C1 / CTRL	C2 / CTRL	C1/M1 CTRL	C2/M2 CTRL	M p-value	C p-value	C/M p-value	M % diff	C % diff	C/M % diff
CTRL	1	397.995	338.08	87.711	332.134	255.913	85.34	59.865	323.489	27.198	76.646	360.904	29.989	0.97533	1.03113	0.174862	0.221741	0.179285	0.215048	0.972192	1.02781	0.881799	1.1182	0.909309	1.09069	0.0305418	0.11612	0.450733	-25.7095	-30.5277	-9.02655
CTRL	2	206.165	208.453	61.484	263.457	237.936	81.792	58.284	293.595	29.168	56.233	250.016	29.036	0.714341	0.866613	0.155344	0.221446	0.217465	0.25553	0.903683	1.09632	0.824566	1.17543	0.919523	1.08048
TUFM	1	235.166	276.183	52.047	254.048	221.957	61.713	64.701	219.739	28.967	105.519	173.503	36.618	0.543321	0.761129	0.0697165	0.130298	0.128315	0.17119	0.541573	0.758681	0.351567	0.657068	0.650797	0.86825
TUFM	2	261.537	355.105	75.801	195.814	187.551	64.155	55.491	130.03	26.355	57.27	154.961	28.142	0.577735	0.743443	0.136727	0.196781	0.236661	0.264689	0.730868	0.940499	0.725746	1.04451	1.00069	1.1192
siRNA	Plate	M1	Y1	C1	M2	Y2	C2	M3	Y3	C3	M4	Y4	C4	M1 / Y1	M2 / Y2	C1 / Y1	C2 / Y2	C1 / M1	C2 / M2	M1 / CTRL	M2 / CTRL	C1 / CTRL	C2 / CTRL	C1/M1 CTRL	C2/M2 CTRL	M p-value	C p-value	C/M p-value	M % diff	C % diff	C/M % diff
CTRL	1	397.995	338.08	87.711	332.134	255.913	85.34	59.865	323.489	27.198	76.646	360.904	29.989	0.97533	1.03113	0.174862	0.221741	0.179285	0.215048	0.972192	1.02781	0.881799	1.1182	0.909309	1.09069	0.00197186	0.0677315	0.00406088	-90.9207	-47.4107	473.731
CTRL	2	206.165	208.453	61.484	263.457	237.936	81.792	58.284	293.595	29.168	56.233	250.016	29.036	0.714341	0.866613	0.155344	0.221446	0.217465	0.25553	0.903683	1.09632	0.824566	1.17543	0.919523	1.08048
U2AF1	1	59.324	101.412	33.238	55.649	79.174	30.822	51.805	90.974	25.794	52.827	116.561	26.949	0.0691042	0.0420972	0.0677089	0.0562116	0.979809	1.33528	0.0688819	0.0419617	0.341444	0.283465	4.96944	6.77236
U2AF1	2	65.876	179.943	45.459	55.061	81.702	33.323	52.108	109.805	27.055	50.788	81.138	26.171	0.0801809	0.0442217	0.104733	0.0821277	1.30621	1.85718	0.101434	0.055943	0.555923	0.435933	5.52314	7.85285
siRNA	Plate	M1	Y1	C1	M2	Y2	C2	M3	Y3	C3	M4	Y4	C4	M1 / Y1	M2 / Y2	C1 / Y1	C2 / Y2	C1 / M1	C2 / M2	M1 / CTRL	M2 / CTRL	C1 / CTRL	C2 / CTRL	C1/M1 CTRL	C2/M2 CTRL	M p-value	C p-value	C/M p-value	M % diff	C % diff	C/M % diff
CTRL	1	397.995	338.08	87.711	332.134	255.913	85.34	59.865	323.489	27.198	76.646	360.904	29.989	0.97533	1.03113	0.174862	0.221741	0.179285	0.215048	0.972192	1.02781	0.881799	1.1182	0.909309	1.09069	0.0492814	0.291199	0.657293	49.1489	82.6763	12.9599
CTRL	2	206.165	208.453	61.484	263.457	237.936	81.792	58.284	293.595	29.168	56.233	250.016	29.036	0.714341	0.866613	0.155344	0.221446	0.217465	0.25553	0.903683	1.09632	0.824566	1.17543	0.919523	1.08048
YBX3	1	193.423	114.509	49.735	221.786	142.636	52.418	53.027	104.925	25.894	50.859	92.757	25.538	1.23554	1.19074	0.209756	0.187204	0.16977	0.157216	1.23156	1.18691	1.05776	0.944034	0.861046	0.797375
YBX3	2	272.482	184.445	74.613	240.385	116.616	113.592	52.174	112.421	27.174	52.77	165.115	26.997	1.19282	1.61138	0.257678	0.741806	0.216024	0.460354	1.50899	2.03849	1.36775	3.9375	0.91343	1.94655
siRNA	Plate	M1	Y1	C1	M2	Y2	C2	M3	Y3	C3	M4	Y4	C4	M1 / Y1	M2 / Y2	C1 / Y1	C2 / Y2	C1 / M1	C2 / M2	M1 / CTRL	M2 / CTRL	C1 / CTRL	C2 / CTRL	C1/M1 CTRL	C2/M2 CTRL	M p-value	C p-value	C/M p-value	M % diff	C % diff	C/M % diff
CTRL	1	397.995	338.08	87.711	332.134	255.913	85.34	59.865	323.489	27.198	76.646	360.904	29.989	0.97533	1.03113	0.174862	0.221741	0.179285	0.215048	0.972192	1.02781	0.881799	1.1182	0.909309	1.09069	1.22205e-06	0.000151678	0.771465	-79.4787	-78.5045	5.31354
CTRL	2	206.165	208.453	61.484	263.457	237.936	81.792	58.284	293.595	29.168	56.233	250.016	29.036	0.714341	0.866613	0.155344	0.221446	0.217465	0.25553	0.903683	1.09632	0.824566	1.17543	0.919523	1.08048
HNRNPL	1	101.844	212.609	32.915	88.926	159.771	32.61	60.562	237.769	27.187	53.501	168.047	26.614	0.210774	0.199626	0.028289	0.0357355	0.134215	0.179012	0.210096	0.198984	0.142656	0.180208	0.680717	0.907923
HNRNPL	2	72.955	104.175	32.143	78.74	136.2	35.308	54.849	119.185	27.732	57.649	121.338	27.355	0.160365	0.165132	0.0441517	0.0570081	0.27532	0.345227	0.202871	0.208902	0.234357	0.302598	1.16416	1.45975
siRNA	Plate	M1	Y1	C1	M2	Y2	C2	M3	Y3	C3	M4	Y4	C4	M1 / Y1	M2 / Y2	C1 / Y1	C2 / Y2	C1 / M1	C2 / M2	M1 / CTRL	M2 / CTRL	C1 / CTRL	C2 / CTRL	C1/M1 CTRL	C2/M2 CTRL	M p-value	C p-value	C/M p-value	M % diff	C % diff	C/M % diff
CTRL	1	397.995	338.08	87.711	332.134	255.913	85.34	59.865	323.489	27.198	76.646	360.904	29.989	0.97533	1.03113	0.174862	0.221741	0.179285	0.215048	0.972192	1.02781	0.881799	1.1182	0.909309	1.09069	0.932324	0.00624025	0.000130276	-1.40439	-50.7793	-50.2873
CTRL	2	206.165	208.453	61.484	263.457	237.936	81.792	58.284	293.595	29.168	56.233	250.016	29.036	0.714341	0.866613	0.155344	0.221446	0.217465	0.25553	0.903683	1.09632	0.824566	1.17543	0.919523	1.08048
COX5A	1	234.884	215.92	42.444	134.802	117.102	33.852	54.877	102.442	26.575	58.306	138.01	26.628	0.825734	0.667884	0.0733721	0.0619161	0.0888568	0.0927049	0.823077	0.665735	0.370002	0.312232	0.450668	0.470186
COX5A	2	333.416	259.959	59.667	183.079	149.81	45.732	55.308	119.666	28.848	51.9	110.435	26.732	1.07637	0.864261	0.122623	0.119765	0.113923	0.138575	1.36167	1.09334	0.650883	0.635712	0.481708	0.585946
siRNA	Plate	M1	Y1	C1	M2	Y2	C2	M3	Y3	C3	M4	Y4	C4	M1 / Y1	M2 / Y2	C1 / Y1	C2 / Y2	C1 / M1	C2 / M2	M1 / CTRL	M2 / CTRL	C1 / CTRL	C2 / CTRL	C1/M1 CTRL	C2/M2 CTRL	M p-value	C p-value	C/M p-value	M % diff	C % diff	C/M % diff
CTRL	1	397.995	338.08	87.711	332.134	255.913	85.34	59.865	323.489	27.198	76.646	360.904	29.989	0.97533	1.03113	0.174862	0.221741	0.179285	0.215048	0.972192	1.02781	0.881799	1.1182	0.909309	1.09069	0.0335286	0.277278	0.672574	-30.4281	-24.7604	4.68854
CTRL	2	206.165	208.453	61.484	263.457	237.936	81.792	58.284	293.595	29.168	56.233	250.016	29.036	0.714341	0.866613	0.155344	0.221446	0.217465	0.25553	0.903683	1.09632	0.824566	1.17543	0.919523	1.08048
SEPT2	1	366.672	503.725	87.626	269.689	374.941	67.371	59.57	292.475	27.413	47.693	240.392	24.816	0.621451	0.576244	0.122113	0.110035	0.196497	0.190951	0.619452	0.57439	0.615795	0.554884	0.996603	0.968478
SEPT2	2	185.013	276.927	56.001	224.293	211.114	80.942	55.245	247.297	28.017	58.419	311.471	29.288	0.462869	0.793225	0.0987571	0.247684	0.213358	0.312249	0.585557	1.00348	0.524202	1.3147	0.902158	1.3203
siRNA	Plate	M1	Y1	C1	M2	Y2	C2	M3	Y3	C3	M4	Y4	C4	M1 / Y1	M2 / Y2	C1 / Y1	C2 / Y2	C1 / M1	C2 / M2	M1 / CTRL	M2 / CTRL	C1 / CTRL	C2 / CTRL	C1/M1 CTRL	C2/M2 CTRL	M p-value	C p-value	C/M p-value	M % diff	C % diff	C/M % diff
CTRL	1	397.995	338.08	87.711	332.134	255.913	85.34	59.865	323.489	27.198	76.646	360.904	29.989	0.97533	1.03113	0.174862	0.221741	0.179285	0.215048	0.972192	1.02781	0.881799	1.1182	0.909309	1.09069	4.19275e-05	0.000810065	0.307499	-54.8403	-60.008	-10.8946
CTRL	2	206.165	208.453	61.484	263.457	237.936	81.792	58.284	293.595	29.168	56.233	250.016	29.036	0.714341	0.866613	0.155344	0.221446	0.217465	0.25553	0.903683	1.09632	0.824566	1.17543	0.919523	1.08048
CAPRIN	1	193.018	317.723	47.202	147.033	197.131	47.684	58.468	199.565	29.218	63.252	209.547	28.37	0.415954	0.437136	0.0579373	0.0958246	0.139288	0.21921	0.414615	0.435729	0.292167	0.483226	0.706447	1.1118
CAPRIN	2	238.371	424.594	63.886	112.751	177.133	39.608	56.744	141.869	26.785	53.8	170.714	27.905	0.431233	0.324496	0.086061	0.0692305	0.19957	0.213347	0.545535	0.410507	0.456811	0.367475	0.843854	0.902112
siRNA	Plate	M1	Y1	C1	M2	Y2	C2	M3	Y3	C3	M4	Y4	C4	M1 / Y1	M2 / Y2	C1 / Y1	C2 / Y2	C1 / M1	C2 / M2	M1 / CTRL	M2 / CTRL	C1 / CTRL	C2 / CTRL	C1/M1 CTRL	C2/M2 CTRL	M p-value	C p-value	C/M p-value	M % diff	C % diff	C/M % diff
CTRL	1	397.995	338.08	87.711	332.134	255.913	85.34	59.865	323.489	27.198	76.646	360.904	29.989	0.97533	1.03113	0.174862	0.221741	0.179285	0.215048	0.972192	1.02781	0.881799	1.1182	0.909309	1.09069	0.253989	0.00850309	0.0127355	-13.3842	-36.6327	-25.0392
CTRL	2	206.165	208.453	61.484	263.457	237.936	81.792	58.284	293.595	29.168	56.233	250.016	29.036	0.714341	0.866613	0.155344	0.221446	0.217465	0.25553	0.903683	1.09632	0.824566	1.17543	0.919523	1.08048
TGM3	1	245.662	261.501	55.935	344.528	421.214	79.724	55.604	330.735	28.741	50.935	350.872	27.86	0.735724	0.691474	0.105676	0.122084	0.143636	0.176556	0.733357	0.689249	0.532907	0.615647	0.728501	0.895467
TGM3	2	454.602	455.472	89.828	206.837	210.555	54.025	52.94	245.04	27.999	52.535	146.395	27.484	0.882303	0.731873	0.136312	0.12483	0.154496	0.170562	1.11617	0.925862	0.723545	0.662594	0.653266	0.721198
siRNA	Plate	M1	Y1	C1	M2	Y2	C2	M3	Y3	C3	M4	Y4	C4	M1 / Y1	M2 / Y2	C1 / Y1	C2 / Y2	C1 / M1	C2 / M2	M1 / CTRL	M2 / CTRL	C1 / CTRL	C2 / CTRL	C1/M1 CTRL	C2/M2 CTRL	M p-value	C p-value	C/M p-value	M % diff	C % diff	C/M % diff
CTRL	1	397.995	338.08	87.711	332.134	255.913	85.34	59.865	323.489	27.198	76.646	360.904	29.989	0.97533	1.03113	0.174862	0.221741	0.179285	0.215048	0.972192	1.02781	0.881799	1.1182	0.909309	1.09069	3.83288e-05	0.0121301	0.000490522	-62.2817	-37.1843	68.9163
CTRL	2	206.165	208.453	61.484	263.457	237.936	81.792	58.284	293.595	29.168	56.233	250.016	29.036	0.714341	0.866613	0.155344	0.221446	0.217465	0.25553	0.903683	1.09632	0.824566	1.17543	0.919523	1.08048
COPG2	1	196.961	298.025	68.479	102.907	146.393	44.98	58.168	167.305	28.906	57.963	420.078	29.171	0.466053	0.306309	0.13234	0.108895	0.283958	0.355508	0.464554	0.305324	0.667364	0.549139	1.44019	1.80308
COPG2	2	82.614	110.125	38.508	170.627	338.306	77.363	58.342	335.548	29.558	53.068	277.769	25.968	0.24435	0.339698	0.0975709	0.146613	0.399309	0.431597	0.309117	0.429738	0.517906	0.778219	1.68842	1.82495
siRNA	Plate	M1	Y1	C1	M2	Y2	C2	M3	Y3	C3	M4	Y4	C4	M1 / Y1	M2 / Y2	C1 / Y1	C2 / Y2	C1 / M1	C2 / M2	M1 / CTRL	M2 / CTRL	C1 / CTRL	C2 / CTRL	C1/M1 CTRL	C2/M2 CTRL	M p-value	C p-value	C/M p-value	M % diff	C % diff	C/M % diff
CTRL	1	397.995	338.08	87.711	332.134	255.913	85.34	59.865	323.489	27.198	76.646	360.904	29.989	0.97533	1.03113	0.174862	0.221741	0.179285	0.215048	0.972192	1.02781	0.881799	1.1182	0.909309	1.09069	0.0207997	0.00391979	7.64598e-05	31.3924	-43.1258	-56.1598
CTRL	2	206.165	208.453	61.484	263.457	237.936	81.792	58.284	293.595	29.168	56.233	250.016	29.036	0.714341	0.866613	0.155344	0.221446	0.217465	0.25553	0.903683	1.09632	0.824566	1.17543	0.919523	1.08048
YBX1	1	369.615	276.693	54.54	406.43	296.301	65.371	55.087	299.988	28.23	56.29	320.965	29.538	1.13457	1.18373	0.0927237	0.123142	0.0817261	0.104028	1.13092	1.17993	0.467589	0.620981	0.414503	0.527615
YBX1	2	387.736	282.551	55.894	365.896	259.085	58.096	53.866	194.865	26.22	69.582	217.275	27.448	1.15382	1.17402	0.102849	0.120663	0.0891378	0.102777	1.45965	1.48521	0.54592	0.640479	0.376907	0.434581
siRNA	Plate	M1	Y1	C1	M2	Y2	C2	M3	Y3	C3	M4	Y4	C4	M1 / Y1	M2 / Y2	C1 / Y1	C2 / Y2	C1 / M1	C2 / M2	M1 / CTRL	M2 / CTRL	C1 / CTRL	C2 / CTRL	C1/M1 CTRL	C2/M2 CTRL	M p-value	C p-value	C/M p-value	M % diff	C % diff	C/M % diff
CTRL	1	397.995	338.08	87.711	332.134	255.913	85.34	59.865	323.489	27.198	76.646	360.904	29.989	0.97533	1.03113	0.174862	0.221741	0.179285	0.215048	0.972192	1.02781	0.881799	1.1182	0.909309	1.09069	7.2494e-05	0.000578178	0.0203918	-49.047	-58.2953	-17.4205
CTRL	2	206.165	208.453	61.484	263.457	237.936	81.792	58.284	293.595	29.168	56.233	250.016	29.036	0.714341	0.866613	0.155344	0.221446	0.217465	0.25553	0.903683	1.09632	0.824566	1.17543	0.919523	1.08048
UBAP2L	1	177.088	240.09	49.267	138.448	171.497	42.406	52.196	141.581	28.028	59.179	236.759	30.96	0.505646	0.482577	0.0823566	0.0752899	0.162874	0.156016	0.504019	0.481024	0.415309	0.379673	0.826073	0.791292
UBAP2L	2	172.515	252.647	49.799	106.862	147.931	38.956	52.508	125.505	27.132	54.373	156.099	28.091	0.471308	0.361124	0.0878202	0.0766878	0.186333	0.212358	0.596232	0.456844	0.466149	0.407058	0.787884	0.897929
siRNA	Plate	M1	Y1	C1	M2	Y2	C2	M3	Y3	C3	M4	Y4	C4	M1 / Y1	M2 / Y2	C1 / Y1	C2 / Y2	C1 / M1	C2 / M2	M1 / CTRL	M2 / CTRL	C1 / CTRL	C2 / CTRL	C1/M1 CTRL	C2/M2 CTRL	M p-value	C p-value	C/M p-value	M % diff	C % diff	C/M % diff
CTRL	1	397.995	338.08	87.711	332.134	255.913	85.34	59.865	323.489	27.198	76.646	360.904	29.989	0.97533	1.03113	0.174862	0.221741	0.179285	0.215048	0.972192	1.02781	0.881799	1.1182	0.909309	1.09069
CTRL	2	206.165	208.453	61.484	263.457	237.936	81.792	58.284	293.595	29.168	56.233	250.016	29.036	0.714341	0.866613	0.155344	0.221446	0.217465	0.25553	0.903683	1.09632	0.824566	1.17543	0.919523	1.08048
NXF1	1	50.331	46.477	27.528	53.555	67.605	27.646	49.629	46.581	25.083	48.081	39.908	25.117	0.0317576	0.0695215	0.0522409	0.0376599	1.64499	0.541702	0.0316555	0.0692978	0.263441	0.189912	8.34313	2.74743
NXF1	2	49.911	65.096	29.74	53.036	44.402	27.861	51.455	45.582	25.917	48.188	35.759	24.474	0.00137489	0.0723954	0.0698123	0.0600311	50.7765	0.829211	0.00173932	0.0915844	0.370563	0.318644	214.702	3.50621
siRNA	Plate	M1	Y1	C1	M2	Y2	C2	M3	Y3	C3	M4	Y4	C4	M1 / Y1	M2 / Y2	C1 / Y1	C2 / Y2	C1 / M1	C2 / M2	M1 / CTRL	M2 / CTRL	C1 / CTRL	C2 / CTRL	C1/M1 CTRL	C2/M2 CTRL	M p-value	C p-value	C/M p-value	M % diff	C % diff	C/M % diff
CTRL	1	397.995	338.08	87.711	332.134	255.913	85.34	59.865	323.489	27.198	76.646	360.904	29.989	0.97533	1.03113	0.174862	0.221741	0.179285	0.215048	0.972192	1.02781	0.881799	1.1182	0.909309	1.09069	3.95284e-06	0.000306668	0.796388	-72.3102	-73.2439	-3.66453
CTRL	2	206.165	208.453	61.484	263.457	237.936	81.792	58.284	293.595	29.168	56.233	250.016	29.036	0.714341	0.866613	0.155344	0.221446	0.217465	0.25553	0.903683	1.09632	0.824566	1.17543	0.919523	1.08048
MOV10	1	93.784	141.316	32.967	80.736	101.925	32.099	64.061	101.295	29.083	50.305	128.441	25.637	0.259001	0.231082	0.039677	0.046495	0.153193	0.201206	0.258168	0.230338	0.200084	0.234466	0.77697	1.02049
MOV10	2	72.174	93.016	29.722	70.997	83.746	32.193	51.621	96.944	26.341	48.356	68.033	25.148	0.238513	0.25086	0.0427615	0.0770007	0.179284	0.306947	0.301733	0.317352	0.226977	0.408719	0.758078	1.29789
siRNA	Plate	M1	Y1	C1	M2	Y2	C2	M3	Y3	C3	M4	Y4	C4	M1 / Y1	M2 / Y2	C1 / Y1	C2 / Y2	C1 / M1	C2 / M2	M1 / CTRL	M2 / CTRL	C1 / CTRL	C2 / CTRL	C1/M1 CTRL	C2/M2 CTRL	M p-value	C p-value	C/M p-value	M % diff	C % diff	C/M % diff
CTRL	1	397.995	338.08	87.711	332.134	255.913	85.34	59.865	323.489	27.198	76.646	360.904	29.989	0.97533	1.03113	0.174862	0.221741	0.179285	0.215048	0.972192	1.02781	0.881799	1.1182	0.909309	1.09069	0.000229165	0.00186764	0.0392017	-42.6935	-50.8514	-14.2094
CTRL	2	206.165	208.453	61.484	263.457	237.936	81.792	58.284	293.595	29.168	56.233	250.016	29.036	0.714341	0.866613	0.155344	0.221446	0.217465	0.25553	0.903683	1.09632	0.824566	1.17543	0.919523	1.08048
IDH3B	1	231.922	310.721	56.78	295.623	413.624	67.977	49.167	128.197	25.943	56.49	288.777	26.998	0.57638	0.586993	0.0975457	0.100348	0.169238	0.170953	0.574526	0.585105	0.491905	0.506038	0.858352	0.867049
IDH3B	2	135.444	165.001	45.306	88.284	100.746	34.251	48.522	81.791	26.134	51.794	218.101	27.935	0.516882	0.378437	0.110736	0.0716306	0.214238	0.18928	0.653886	0.478745	0.587784	0.380215	0.905877	0.800347

## Sheet: Cell Viability Calcs
Figure 3-source data 1: siRNA knockdown screen; fluorescence data for early and late HIV gene expression; cell viability calculations, statistical calculations for changes in expression.
siRNA	Plate	Y1	Y2	Y3	Y4	M1	M2	M3	M4	C1	C2	C3	C4		Averages	mCherry Infected	YFP infected	CFP infected	mCherry uninfected	YFP uninfected	CFP uninfected	Average Total YFP
ALOX12B	4	200.024	194.944	203.703	166.236	362.059	561.97	54.665	51.995	99.017	166.479	42.461	39.498		Plate 4	625.518	264.499	222.684	53.9485	184.352	40.9873	224.425
CANX	4	911.316	756.992	247.078	217.007	1829.97	1941.08	58.458	55.597	767.979	878.164	43.54	41.494		Plate 5	687.789	248.076	283.716	56.6317	223.804	42.6879	236.08
CASP14	4	422.914	221.385	198.846	281.752	710.83	493.422	54.689	54.975	144.811	125.736	41.425	42.112		Plate 6	529.661	195.728	195.353	163.959	190.251	94.0664	192.99
CKAP5	4	55.123	74.45	44.715	41.197	58.473	110.97	47.472	46.72	39.186	63.235	35.578	35.15		Plate 7	286.729	135.791	121.683	109.012	138.833	68.1153	137.33
CSDE1	4	379.29	344.692	154.617	238.407	1020.6	1156.65	58.576	58.69	459.886	643.804	46.779	48.831		Plate 8	400.838	272.858	220.416	128.041	219.249	78.8638	246.053
CTRL	4	238.71	259.692	250.364	333.351	619.645	594.941	71.828	74.998	193.126	214.282	46.763	49.751		Plate 9	273.725	159.17	146.576	134.736	111.167	77.6501	135.168
DDX3X	4	282.211	312.865	279.624	213.344	502.633	899.434	54.201	52.505	155.26	382.943	41.301	40.052		Plate 10	530.452	286.15	287.29	59.5315	222.391	44.8067	254.27
ETFB	4	143.584	144.245	107.665	163.386	222.435	320.248	46.9	59.319	87.223	120.629	34.533	59.433		Plate 11	376.034	300.584	169.922	60.6733	225.982	44.9875	263.283
FAM120A	4	167.741	226.95	177.967	198.969	275.12	510.37	57.5	57.25	81.59	130.146	40.262	40.117		Plate 12	323.752	248.755	154.683	76.6404	148.126	53.86	197.834
G3BP1	4	188.762	188.004	163.476	146.264	366.774	406.067	54.308	51.241	128.469	113.178	39.742	37.761		Plate 13	204.47	189.29	100.204	56.1472	126.278	40.8401	157.784
HNRNPR	4	300.378	432.007	129.326	302.878	524.775	773.869	48.635	50.437	124.336	192.345	37.382	38.601		Plate 14	459.247	288.62	511.899	71.161	230.681	113.384	259.65
IGF2BP1	4	323.374	232.096	197.694	221.806	537.267	853.665	51.298	50.563	144.189	185.421	40.674	39.077		Plate 15	545.958	385.862	760.446	69.9907	277.169	115.592	339.141
IGF2BP3	4	327.747	362.198	182.662	236.294	643.825	899.686	55.342	56.186	177.716	269.561	41.339	41.984		Plate 16	202.38	129.211	186.883	56.6925	78.2221	78.7635	102.608
LRPPRC	4	275.073	206.358	163.979	275.919	913.4	695.487	52.664	49.649	315.611	199.108	41.169	38.762		Plate 17	95.9141	69.9366	104.11	53.4957	50.7816	71.0858	60.3591
MBOAT7	4	239.902	310.389	159.1	295.032	698.976	1091.06	59.424	60.071	328.824	506.793	44.552	45.223		Plate 18	160.208	219.926	49.1608	54.963	187.46	27.1946	203.693
MRPL1	4	227.595	159.933	201.115	168.55	459.257	332.086	53.286	50.25	163.303	109.549	40.688	38.821		Plate 19	222.797	221.575	60.0384	55.6744	175.247	27.5448	198.411
PMPCB	4	136.129	167.183	90.227	95.744	275.66	397.115	48.003	46.479	92.089	110.492	36.01	34.995
PRRC2A	4	151.912	190.044	146.335	223.395	341.774	456.558	53.772	50.917	113.624	127.308	40.488	37.633		STDEVs	mCherry Infected	YFP infected	CFP infected	mCherry uninfected	YFP uninfected	CFP uninfected	Average Total YFP
RPL15	4	96.348	104.969	72.515	85.583	142.716	152.118	52.297	51.897	92.518	82.59	40.338	39.451		Plate 4	395.805	155.134	184.891	5.61159	71.9144	4.38412	126.789
RPL29	4	231.815	206.821	106.384	123.967	712.312	258.391	53.725	52.682	210.41	67.372	40.53	40.289		Plate 5	376.555	101.454	143.997	3.70321	79.1778	2.38821	91.4173
SLTM	4	331.725	367.938	200.591	321.284	1027.55	1068.83	52.009	49.886	400.516	375.196	40.524	38.519		Plate 6	231.811	74.1847	73.6677	74.0072	79.5273	35.8899	76.5088
TCOF1	4	279.725	262.402	128.787	154.338	669.859	632.86	51.638	50.737	220.004	194.096	40.576	39.235		Plate 7	109.041	55.2303	38.7368	32.3131	67.7572	15.2016	61.5293
CTRL	5	360.117	205.422	191.267	189.829	1588.52	980.462	51.399	49.553	582.891	458.621	38.54	38.684		Plate 8	233.222	152.411	158.583	29.9539	147.669	11.3454	151.61
DDX3X	5	311.978	344.872	255.502	347.89	914.526	1101.62	64.702	62.274	476.094	591.467	48.076	46.586		Plate 9	121.784	90.4817	61.7987	60.7231	49.9726	20.2285	76.5727
SBNO1	5	152.372	197.746	262.568	200.662	500.524	722.944	67.357	58.114	168.927	268.816	48.106	43.369		Plate 10	274.603	139.336	191.709	5.4745	124.868	3.2583	135.389
SCCPDH	5	475.915	477.901	387.007	354.424	1358.72	1511.89	60.311	59.367	436.389	542.887	44.673	45.226		Plate 11	235.685	166.525	135.52	7.30224	159.005	3.90185	166.118
SF3B2	5	246.049	248.448		196.708	165.121	278.538		55.582	134.056	215.333		42.072		Plate 12	276.964	207.819	119.951	129.203	176.632	85.0578	198.064
SON	5	110.185	97.067	78.232	124.368	207.699	158.013	52.251	57.174	106.375	78.826	39.075	43.691		Plate 13	104.378	91.2204	35.6819	4.22596	106.482	2.83984	103.518
SRP72	5	370.146	120.181	306.372	153.127	761.5	102.346	59.235	56.95	311.056	54.46	42.908	42.467		Plate 14	265.5	152.712	326.242	12.4016	142.306	25.5591	149.576
SRRM2	5	471.089	239.361	371.838	181.521	547.171	259.448	61.261	53.892	489.093	219.453	46.097	42.207		Plate 15	295.047	192.992	528.27	8.53709	130.206	23.4526	173.155
SRSF6	5	163.923	220.408	180.792	144.602	519.087	668.301	59.27	60.98	336.238	494.445	45.829	43.982		Plate 16	107.831	57.4149	90.2671	4.77137	60.5913	11.0543	63.8589
STAU2	5	265.241	239.654	251.678	299.569	790.776	717.872	55.702	54.027	246.86	226.766	42.678	42.351		Plate 17	33.3124	47.1582	30.078	2.54432	20.5612	5.72587	37.3184
TNPO1	5	265.108	269.492	213.324	151.606	1159.08	1254.11	56.688	55.849	340.178	391.953	42.409	42.379		Plate 18	82.9843	125.777	19.3013	4.03097	99.4672	1.31122	113.846
TOP1	5	265.726	266.972	263.217	193.597	847.677	866.212	59.261	56.82	350.92	355.446	44.817	43.433		Plate 19	115.581	118.625	22.6873	9.21974	82.6773	2.1504	104.234
TRA2A	5	227.66	277.698	202.134	290.69	559.037	657.868	51.833	57.036	253.337	286.276	40.516	44.555
TRIM56	5	151.014	137.81	207.465	333.36	363.846	430.419	54.733	54.492	129.477	169.358	40.856	40.36		Averages - 1 Stdev	mCherry Infected	YFP infected	CFP infected	mCherry uninfected	YFP uninfected	CFP uninfected	Average Total YFP
UPF1	5	107.827	154.254	182.673	230.574	227.211	405.399	51.937	54.836	83.908	151.733	39.886	39.786		Plate 4	229.713	109.365	37.7934	48.3369	112.437	36.6032	97.6361	34.2415
VAPA	5	109.491	159.254	134.122	172.136	350.915	774.765	56.341	52.409	132.126	265.115	40.224	40.354		Plate 5	311.234	146.622	139.718	52.9284	144.626	40.2997	144.662	98.9537
YTHDC1	5	178.232	445.68	322.086	99.842	497.227	1490.68	60.809	59.122	98.592	282.581	44.239	40.509		Plate 6	297.851	121.544	121.686	89.9521	110.724	58.1764	116.481	78.2267
YTHDC2	5	281.804	207.492	222.552	236.525	671.336	667.432	56.325	55.87	217.765	258.495	42.171	40.281		Plate 7	177.688	80.5604	82.9459	76.6988	71.0762	52.9137	75.8011	45.0364
YTHDF1	5	438.884	238.302	333.898	330.239	1126.87	672.968	57.081	55.056	517.423	318.976	45.59	41.733		Plate 8	167.616	120.447	61.8324	98.0868	71.5797	67.5184	94.4435	18.6388
YTHDF2	5	260.075	254.313	131.146	151.544	770.559	689.366	52.301	53.633	331.336	309.969	41.418	41.224		Plate 9	151.941	68.6881	84.7776	74.0126	61.1942	57.4216	58.5955	20.3092
YTHDF3	5	252.743	198.611	239.783	133.542	411.924	443.205	60.798	54.158	142.383	143.791	44.855	43.778		Plate 10	255.849	146.814	95.582	54.057	97.5223	41.5484	118.882	51.1872
ZNF326	5	238.613	210.217	131.675	237.897	568.161	501.373	53.465	54.907	287.556	225.752	41.911	41.679		Plate 11	140.349	134.059	34.4016	53.371	66.9768	41.0856	97.1645	14.1053
ACACA	6	91.199	145.38	136.315	166.73	250.202	476.455	103.344	105.61	101.124	170.009	67.014	65.635		Plate 12	46.7882	40.936	34.7324	-52.5631	-28.5065	-31.1978	-0.229528	-99.2614
AGO1	6	149.673	283.536	150.269	133.604	290.224	723.252	102.075	101.942	138.246	293.305	75.35	79.094		Plate 13	100.092	98.0698	64.5226	51.9213	19.7953	38.0003	54.2658	2.50677
ATXN2L	6	190.714	187.599	216.469	227.566	382.824	513.022	147.701	209.416	142.616	209.322	89.481	107.463		Plate 14	193.747	135.908	185.657	58.7594	88.3743	87.8246	110.075	35.2867
BUB3	6	121.714	100.736	118.338	120.808	313.603	239.713	115.551	131.184	122.562	91.121	66.147	70.715		Plate 15	250.912	192.87	232.176	61.4536	146.963	92.1398	165.986	79.4079
CAD	6	124.037	148.482	158.341	148.169	310.053	349.361	112.111	121.173	141.747	151.7	78.361	84.37		Plate 16	94.5495	71.7962	96.6156	51.9211	17.6308	67.7093	38.7493	6.81985
CSE1L	6	287.731	318.18	218.096	174.393	525.487	377.774	180.619	110.829	218.955	140.384	98.514	74.768		Plate 17	62.6017	22.7784	74.0321	50.9514	30.2203	65.36	23.0406	4.38142
CTRL	6	206.315	280.725	205.693	306.45	862.496	1013.49	242.924	276.853	313.318	340.153	119.585	121.371		Plate 18	77.2233	94.149	29.8595	50.932	87.9924	25.8834	89.8469	32.9241
DDX1	6	81.518	161.6	89.847	86.336	267.09	427.388	96.553	92.166	116.827	143.348	65.341	62.828		Plate 19	107.216	102.95	37.3511	46.4546	92.57	25.3944	94.177	42.0601
DYNC1H1	6	92.285	128.986	83.644	83.181	177.833	267.64	86.731	82.883	81.472	102.954	59.325	56.054
GALNT2	6	120.265	128.894	153.139	79.899	378.954	371.128	149.214	112.607	126.429	130.344	84.77	65.474
GANAB	6	211.606	238.215	213.912	200.847	852.357	932.824	218.458	219.138	281.06	289.498	99.506	94.413
KPNA2	6	173.845	144.757	125.808	145.15	586.931	378.474	90.642	97.343	258.139	166.89	59.811	63.638
LARS	6	156.129	148.15	272.023	266.06	365.495	339.574	184.022	189.198	121.923	112.631	106.056	107.691
MRPS31	6	203.171	247.216	233.743	281.506	643.625	718.038	165.449	208.531	237.308	269.899	98.444	114.961
MTHFD2	6	267.711	199.366	288.573	277.901	1033.14	761.907	272.238	243.911	276.781	268.41	129.238	114.225
NCAPG	6	391.38	320.737	317.519	365.909	890.124	878.657	350.019	432.258	286.226	293.343	175.28	254.491
NCOA5	6	279.335	271.398	149.448	325.023	652.593	778.813	98.455	131.577	211.39	308.362	63.509	78.8
PC	6	170.405	204.865	248.252	133.695	496.759	452.012	170.287	170.237	181.684	168.226	94.064	90.706
RBM12B	6	218.273	308.031	259.808	269.258	637.988	619.31	125.096	161.22	269.601	230.825	76.077	108.853
RBM12B	6	218.273	308.031	259.808	269.258	637.988	619.31	125.096	161.22	269.601	230.825	76.077	108.853
RFC3	6	145.259	132.652	119.207	134.284	536.586	309.85	184.62	163.499	173.931	113.323	101.92	94.074
RPS17	6	162.652	141.026	54.712	102.06	318.775	345.981	114.499	255.709	143.285	156.447	74.272	162.301
CNOT8	7	144.246	109.882	196.475	153.765	369.387	370.661	129.054	95.565	124.898	150.548	79.209	63.768
CSNK1A1	7	84.139	103.631	130.173	97.122	178.17	276.515	107.692	89.141	88.953	128.47	66.551	60.144
CTRL	7	136.877	134.659	156.815	126.738	412.861	380.354	102.438	107.663	180.001	148.531	60.733	64.072
DAZAP1	7	143.48	157.547	214.555	156.511	283.45	311.415	112.75	105.18	125.49	146.732	68.753	67.766
DDX17	7	144.473	124.136	230.53	316.735	279.982	261.675	129.085	167.583	125.913	113.53	83.421	108.851
DDX21	7	116.438	68.906	58.208	58.666	315.027	102.257	64.891	73.838	119.604	56.156	44.647	54.753
DNM2	7	110.489	102.218	155.438	174.98	311.413	203.928	117.005	95.563	127.747	91.311	65.538	62.337
EIF3C	7	112.475	92.258	65.585	59.68	196.886	169.053	83.074	82.83	82.836	72.456	53.266	52.343
FAM133B	7	102.152	116.692	157.045	197.691	267.199	249.848	114.21	115.896	126.949	117.067	63.343	69.575
GRSF1	7	206.657	189.182	200.27	168.604	591.984	435.487	217.358	204.77	214.791	159.504	109.916	105.936
HNRNPA3	7	160.482	169.157	98.839	99.878	276.094	251.293	80.016	79.029	124.472	119.341	52.244	54.12
HNRNPK	7	155.336	145.129	126.768	139.573	286.253	222.394	109.406	108.074	112.562	90.92	66.576	73.685
ILF2	7	353.802	293.515	247.432	378.315	521.637	425.913	178.236	104.913	209.529	171.338	95.186	72.287
IPO4	7	131.049	107.396	113.781	96.002	472.11	293.256	100.597	105.07	195.329	133.336	66.143	58.358
MBNL1	7	74.912	88.868	69.008	60.469	106.725	130.735	78.268	70.048	62.717	78.786	51.562	47.494
MCCC1	7	106.53	110.985	135.724	107.049	198.072	225.606	113.104	84.342	85.967	91.911	65.622	54.867
MOV10	7	69.299	81.205	82.212	82.582	139.783	175.911	128.887	101.603	70.405	82.126	78.238	68.653
NUP155	7	147.672		99.964	99.913	425.469		97.67	91.946	149.156		59.626	60.755
NUP54	7	128.026	100.651	142.618	145.816	294.984	246.61	99.283	106.439	100.489	93.128	78.182	75.433
PABPC1	7	198.679	184.878	123.268	81.531	309.664	301.377	130.306	118.682	163.615	149.41	82.048	66.658
PABPN1	7	142.274	117.038	126.593	98.082	254.346	230.106	94.374	82.62	106.656	96.309	68.363	59.821
ALOX12B	8	180.964	270.64	163.633	327.082	275.389	368.936	116.971	146.515	138.905	191.838	73.2	82.214
CANX	8	351.569	311.874	230.116	184.816	422.902	310.511	114.979	103.122	223.682	154.681	76.042	69.708
CASP14	8	102.961	165.962	162.587	190.095	176.965	277.188	109.25	122.521	108.111	153.917	77.293	81.848
CKAP5	8	93.752	80.431	96.274	82.504	148.891	99.601	105.475	98.439	94.946	68.519	73.055	68.424
CSDE1	8	403.058	866.723	92.415	74.193	627.588	1126.3	96.578	88.792	474.372	837.451	70.331	64.782
CTRL	8	242.075	235.136	141.127	123.729	424.564	454.069	149.968	133.899	226.266	256.618	79.704	75.96
DDX3X	8	140.908	269.947	410.371	226.381	232.642	413.267	127.767	123.008	138.104	220.524	79.948	78.024
ETFB	8	340.901	491.984	93.69	103.697	508.219	636.48	113.511	131.298	271.876	333.528	70.122	73.596
FAM120A	8	190.077	310.072	255.643	123.101	256.296	420.597	135.556	103.098	114.903	169.873	85.406	70.4
G3BP1	8	139.404	174.733	168.584	353.634	262.291	307.644	180.981	192.651	129.429	147.066	90.235	102.98
HNRNPR	8	129.62	304.445	173.97	177.756	149.284	389.741	120.632	129.022	81.487	170.882	71.998	65.693
IGF2BP1	8	276.008	268.871	346.018	282.355	352.279	386.438	134.292	116.978	158.82	169.697	78.558	69.856
IGF2BP3	8	547.501	290.923	412.144	327.887	462.039	334.706	127.818	126.599	234.312	145.356	79.744	78.64
LRPPRC	8	258.535	408.3	72.158	108.146	533.37	903.697	104.028	101.565	259.078	503.109	69.187	68.07
MBOAT7	8	196.312	531.662	227.558	104.714	594.344	1204.51	239.124	137.564	322.774	761.085	115.976	72.395
MRPL1	8	534.344	230.464	96.824	127.177	625.824	283.816	94.438	96.217	294.471	124.499	66.763	66.492
PMPCB	8	145.806	183.69	248.524	253.487	230.768	308.706	128.999	151.135	121.67	150.079	82.655	97.832
PRRC2A	8	176.334	321.295	247.999	894.62	298.477	452.391	145.278	193.479	145.864	208.167	86.206	106.927
RPL15	8	94.644	81.252	145.341	90.345	118.661	114.111	113.873	101.078	85.535	81.865	77.012	70.5
RPL29	8	148.398	240.748	348.19	515.194	227.454	290.18	143.035	165.589	131.297	146.089	88.651	97.168
SLTM	8	356.549	282.767	269.549	189.855	498.051	298.234	133.097	117.752	312.958	156.334	86.293	79.698
TCOF1	8	267.421	366.671	170.954	212.503	394.054	435.394	108.75	109.073	247.515	230.744	74.87	75.553
CTRL	9	350.67	135.564	53.626	93.486	531.03	217.649	81.239	94.053	245.12	118.438	58.34	60.175
DDX3X	9	266.999	497.061	72.89	180.345	487.085	650.906	91.334	277.205	281.341	323.322	65.896	115.63
SBNO1	9	147.614	85.886	79.548	135	413.745	278.512	91.581	135	204.168	165.436	63.831	84.941
SCCPDH	9	88.276	162.841	62.91	91.302	172.432	267.346	94.436	82.35	88.689	139.499	66.547	57.82
SF3B2	9	88.286	300.915	69.585	90.15	176.911	300.016	89.275	98.444	92.718	175.558	64.971	66.779
SON	9	232.785	113.231	63.596	51.834	356.132	288.024	104.515	85.406	173.408	162.58	64.693	63.883
SRP72	9	102.032	98.834	154.429	189.506	153.049	244.442	230.341	199.616	80.722	120.333	112.652	93.894
SRRM2	9	161.722	313.358	108.088	237.752	251.27	530.679	300.508	285.331	123.725	309.366	143.003	122.934
SRSF6	9	159.705	160.821	91.367	199.525	282.601	359.339	245.684	264.134	164.71	215.227	100.858	127.467
STAU2	9	100.902	121.511	61.893	107.249	232.181	247.085	107.086	182.835	111.577	112.508	65.357	83.47
TNPO1	9	77.787	98.799	71.363	140.369	148.474	240.484	136.393	103.973	100.208	124.651	68.454	64.451
TOP1	9	92.923	117.788	68.116	158.301	222.868	280.273	124.326	175.924	105.033	152.741	70.713	86.315
TRA2A	9	123.401	138.322	80.248	111.382	171.805	231.486	101.555	100.747	101.854	99.172	68.056	65.86
TRIM56	9	281.781	117.245	60.483	66.838	386.058	197.603	81.889	89.179	191.596	108.16	59.047	61.653
UPF1	9	87.717	107.654	230.097	144.397	156.987	188.137	161.106	120.23	89.121	97.228	93.004	70.842
VAPA	9	77.194	79.425	60.431	79.18	141.097	162.258	91.647	83.991	90.38	99.056	60.03	59.591
YTHDC1	9	93.987	105.934	73.959	193.34	201.78	155.837	96.45	109.71	95.681	81.177	68.098	69.437
YTHDC2	9	127.665	98.105	157.732	104.679	259.81	167.061	113.812	137.645	148.44	110.196	78.029	76.681
YTHDF1	9	323.946	175.538	159.001	145.602	380.909	296.489	122.109	143.193	194.906	146.04	81.048	82.198
YTHDF2	9	218.393	87.336	134.891	128.583	507.879	152.971	127.572	113.334	230.168	102.336	84.193	66.437
YTHDF3	9	155.476	114.725	96.804	103.068	265.785	151.319	157.812	110.647	159.017	95.4	90.501	72.833
ZNF326	9	217.066	196.251	50.807	77.586	350.748	185.349	87.002	97.752	219.127	99.226	62.781	73.211
ACACA	10	242.14	188.429	144.622	297.412	413.254	394.521	56.753	61.866	147.233	177.728	42.353	43.98
AGO1	10	265.417	411.549	174.586	516.966	443.65	859.352	54.013	63.79	261.317	573.314	42.068	46.239
ATXN2L	10	491.035	474.546	395.087	358.192	725.268	742.358	65.347	58.832	314.914	464.332	49.812	45.505
BUB3	10	458.087	460.854	146.246	291.53	716.016	879.747	57.394	66.574	252.286	335.191	44.793	47.235
CAD	10	301.508	213.089	380.115	338.632	312.529	246.868	63.537	63.03	103.817	95.475	45.88	46.112
CSE1L	10	410.123	415.217	575.57	442.26	241.48	240.662	69.259	67.549	111.48	108.297	51.03	50.821
CTRL	10	140.405	224.016	145.246	301.529	308.202	506.59	56.549	61.984	163.22	296.034	43.253	44.713
DDX1	10	96.219	87.286	84.823	137.626	195.46	176.945	58.943	66.763	89.902	82.973	42.24	47.068
DYNC1H1	10	129.243	74.704	67.226	68.115	179.539	107.421	52.223	54.965	87.546	60.677	40.361	42.244
GALNT2	10	219.603	313.429	216.392	141.763	662.805	839.973	64.487	53.826	275.759	342.927	50.856	42.337
GANAB	10	463.552	359.126	275.685	186.41	1277.86	858.198	63.196	59.317	797.732	506.031	48.091	46.212
KPNA2	10	273.865	190.365	117.773	206.821	504.783	341.595	57.068	56.656	388.895	290.56	43.284	45.289
LARS	10	166.699	159.073	126.487	127.034	454.613	369.837	57.339	53.371	180.152	155.026	42.894	41.007
MRPS31	10	486.189	363.268	293.234	383.617	774.061	701.385	59.766	66.948	315.712	367.187	46.536	48.727
MTHFD2	10	225.136	192.512	395.224	268.215	512.071	548.924	66.087	73.64	237.099	230.106	45.716	54.186
NCAPG	10	219.486	173.823	295.502	110.38	402.179	301.338	65.786	52.349	298.119	170.666	45.624	40.092
NCOA5	10	298.958	224.128	120.058	170.975	412.743	383.842	53.603	56.619	228.389	290.261	42.762	44.291
PC	10	196.817	213.316	158.643	159.635	392.703	484.296	63.799	61.327	201.821	328.496	47.295	43.226
RBM12B	10	562.406	473.331	147.015	226.169	1059.06	690.343	53.448	55.363	824.541	469.442	41.454	41.754
RBM12B	10	562.406	473.331	147.015	226.169	1059.06	690.343	53.448	55.363	824.541	469.442	41.454	41.754
RFC3	10	208.787	254.672	114.583	150.854	760.712	740.846	56.032	51.796	288.615	244.052	45.617	40.973
RPS17	10	118.906	113.538	59.751	93.997	223.098	203.332	53.912	55.469	96.498	92.976	42.889	41.466
CNOT8	11	296.411	236.285	206.271	183.571	392.938	359.965	62.551	62.901	166.499	152.557	45.262	45.347
CSNK1A1	11	271.212	287.27	153.978	173.756	335.536	338.044	62.852	64.11	169.31	172.826	48.784	49.04
CTRL	11	189.18	191.6	173.992	338.074	335.132	337.423	63.959	71.778	182.018	174.717	44.171	49.331
DAZAP1	11	451.292	364.541	429.505	299.221	387.561	326.292	69.149	69.656	143.204	123.049	48.634	50.047
DDX17	11	261.346	161.34	600.079	304.048	245.181	214.757	79.085	66.748	77.256	77.254	50.711	45.978
DDX21	11	244.483	293.735	131.909	159.655	261.474	323.774	55.336	60.491	118.637	134.003	41.688	43.336
DNM2	11	348.527	325.413	248.705	297.072	379.072	283.189	70.724	70.544	178.186	112.831	50.112	50.781
EIF3C	11	77.035	64.313	62.938	56.679	113.663	142.531	51.779	52.718	49.564	60.236	40.547	40.782
FAM133B	11	213.085	165.527	184.816	150.718	318.48	244.569	65.292	54.898	178.728	134.82	45.59	41.07
GRSF1	11	747.732	459.253	218.819	321.924	1329.41	1004.36	55.414	64.533	669.777	727.559	42.443	50.587
HNRNPA3	11	329.971	219.819	168.708	180.351	465.234	259.697	57.871	58.003	211.3	124.04	44.649	44.945
HNRNPK	11	289.687	286.668	138.318	129.192	146.062	159.579	55.221	52.339	62.3	69.066	42.394	40.452
ILF2	11	660.053	398.284	255.215	209.294	492.104	311.993	51.909	56.835	180.574	124.743	41.126	42.46
IPO4	11	227.604	175.897	189.498	144.033	408.883	316.933	57.834	56.364	210.536	160.968	43.522	42.889
MBNL1	11	159.466	131.937	121.645	120.081	323.606	218.749	59.491	60.342	144.866	87.554	44.163	44.14
MCCC1	11	486.755	233.761	126.801	115.766	842.694	360.821	52.886	52.741	371.267	158.166	42.02	41.378
MOV10	11	87.162	70.33	81.092	69.959	152.402	111.563	52.846	51.631	77.593	58.99	40.724	39.856
NUP155	11	244.058	442.149	227.487	241.409	614.715	746.604	71.061	59.662	207.503	207.958	50.612	43.491
NUP54	11	319.573	251.238	183.93	215.392	365.399	296.257	57.203	55.899	111.504	97.384	45.58	43.657
PABPC1	11	818.559	470.997	528.263	941.426	556.905	343.864	65.96	77.723	284.46	201.065	51.728	54.475
PABPN1	11	429.371	241.609	190.466	217.184	340.114	285.895	56.406	53.533	96.052	85.805	41.387	39.584
AARS2	12	398.879	406.522	247.852	189.383	346.054	450.097	62.033	64.953	110.216	149.793	46.752	47.069
ALDH4A1	12	459.54	428.727	120.903	72.232	342.576	348.912	56.034	52.578	194.281	212.785	40.888	39.751
ATP5F1	12	232.92	200.125	65.105	53.667	205.374	251.888	52.767	52.065	97.633	110.919	39.026	38.262
BCAP31	12	187.365	889.738	480.484	196.314	181.943	1445.48	893.385	50.922	74.411	741.234	591.614	35.995
CLPX	12	451.07	341.64	195.075	495.179	635.433	488.404	54.238	62.248	275.561	176.712	38.667	42.93
COPG1	12	127.974	62.804	46.985	45.417	228.296	133.905	52.165	51.158	162.865	94.549	37.698	37.512
CTRL	12		354.824	184.575	329.005		559.163	55.396	62.361		287.271	39.218	43.318
GBAS	12	204.908	107.218	72.901	72.145	379.515	230.413	60.602	55.457	193.22	121.48	43.162	41.075
GSDMA	12	83.582	83.638	51.987	50.159	127.527	134.063	54.818	54.694	114.318	117.595	40.522	40.003
H1F0	12	97.932	105.595	56.024	56.376	159.589	136.407	53.886	52.392	96.936	73.658	39.961	39.033
HIST1H1B	12	127.924	94.539	85.167	65.466	180.351	115.188	57.235	55.069	85.761	58.504	42.077	40.104
HIST1H1D	12	491.576	611.011	765.821	782.548	783.537	1067.3	79.118	61.231	157.262	268.304	51.962	39.753
HIST1H1E	12	270.965	241.534	157.495	190.751	275.927	276.918	56.606	58.232	116.765	126.081	41.819	40.899
HISTH1C	12	136.872	128.833	84.248	87.3	180.706	154.991	54.82	55.89	99.379	83.902	40.573	41.174
IDH2	12	121.951	57.271	43.839	70.385	123.978	77.798	50.79	58.135	61.943	46.36	36.713	36.661
LGALS9	12	239.882	202.136	125.599	85.067	322.256	452.317	56.66	55.851	138.88	316.503	40.218	39.703
LOR	12	474.496	72.232	49.005	54.957	587.665	97.891	54.834	52.602	241.749	58.537	41.098	39.159
NCLN	12	63.433	162.712	38.945	51.189	164.603	384.081	59.073	56.182	141.75	193.143	40.707	39.587
PCCA	12	184.231	147.994	74.024	108.859	293.078	219.839	57.017	57.946	181.068	117.085	39.773	40.97
PSMD14	12	69.745	64.171	59.336	49.563	77.844	63.071	66.921	54.96	49.278	42.031	48.363	41.265
RPL21	12	898.592	111.862	51.204	58.742	506.855	82.594	52.994	52.577	302.164	50.125	39.272	37.815
AARS2	13	186.678	336.073	286.8	638.448	208.086	250.893	66.141	64.982	91.882	82.619	49.073	47.345
ALDH4A1	13	273.964	264.249	131.372	148.686	187.925	232.434	55.7	57.232	115.223	165.128	40.04	40.919
ATP5F1	13	269.421	106.373	77.576	75.818	164.874	98.359	52.589	52.53	66.484	47.989	39.236	38.167
BCAP31	13	221.729	135.156	68.806	121.623	234.401	182.761	52.596	61.828	100.691	82.143	37.372	41.592
CLPX	13	391.969	295.75	239.929	298.028	426.852	385.663	51.695	52.67	134.996	137.065	37.583	37.72
COPG1	13	187.977	218.016	113.403	117.59	231.429	225.719	56.348	55.954	129.602	122.931	40.352	40.799
CTRL	13	183.428	205.873	125.771	144.46	218.562	235.068	52.647	52.9	123.041	124.23	38.238	39.071
GBAS	13	168.147	107.29	60.848	73.49	245.003	164.249	53.904	53.493	108.735	86.951	39.652	40.585
GSDMA	13	154.581	106.607	57.168	65.761	187.227	127.932	54.691	55.965	159.363	104.845	41.41	42.252
H1F0	13	116.003	128.402	71.903	102.11	121.88	151.947	56.184	56.549	66.547	84.1	42.155	42.217
HIST1H1B	13	130.532	92.444	83.589	66.293	119.602	82.699	57.154	53.553	61.286	48.053	41.512	39.475
HIST1H1D	13	405.198	399.045	233.577	252.152	472.858	487.641	54.822	58.875	113.008	121.552	39.285	42.214
HIST1H1E	13	214.555	233.916	179.415	191.258	240.013	181.522	57.564	60.577	116.451	81.376	41.419	42.689
HISTH1C	13	182.566	173.593	97.101	92.035	193.647	180.482	60.25	55.935	105.316	91.494	43.207	40.837
IDH2	13	207.269	86.136	44.385	55.918	198.167	82.474	50.108	48.896	94.837	46.781	37.762	35.347
LGALS9	13	305.755	276.459	148.789	217.702	333.348	358.896	65.092	57.056	145.953	173.971	44.563	41.057
LOR	13	75.769	75.571	52.845	67.502	86.815	96.691	55.979	53.452	53.804	61.636	40.449	39.32
NCLN	13	186.143	57.738	39.518	65.227	303.127	118.057	53.208	55.276	170.675	88.167	38.927	38.638
PCCA	13	132.577	200.139	78.343	92.636	118.717	235.546	64.386	54.982	65.998	145.424	47.598	41.893
PSMD14	13	84.634	81.605	52.853	38.638	81.175	79.695	58.315	50.531	52.643	49.15	42.071	38.076
RPL21	13	158.652	132.204	70.453	63.84	129.981	125.311	63.274	52.3	98.565	87.881	44.912	38.256
AFG3L2	14	208.572	156.521	126.686	147.978	329.934	192.976	64.609	64.949	393.125	196.213	98.388	98.165
CTRL	14	241.222	279.157	147.426	151.564	407.063	446.621	64.029	63.269	394.647	446.752	93.745	103.554
DHX30	14	300.95	295.113	197.715	210.83	677.146	694.556	65.807	78.955	848.816	843.91	102.435	151.503
DLD	14	169.446	199.657	213.497	203.231	441.341	550.146	81.927	81.354	478.465	526.244	150.964	150.768
GCDH	14	321.214	213.234	268.345	233.016	623.765	515.554	70.211	75.212	749.147	708.533	113.968	103.583
HADHA	14	352.522	363.664	439.271	184.562	567.619	711.4	77.053	67.631	367.558	459.408	131.254	114.266
HINT2	14	229.688	261.818	337.246	357.219	348.085	351.579	70.456	76.119	414.83	393.154	112.857	125.711
HSD17B10	14	632.976	273.569	66.822	81.657	1005.41	445.027	56.528	60.708	1212.6	469.103	84.724	91.711
MTHFD1L	14	352.11	182.056	317.474	544.261	525.912	208.983	94.984	92.533	454.043	200.364	166.003	159.268
MUT	14	380.618	99.895	75.386	72.283	456.68	141.831	61.288	55.854	602.1	180.141	96.355	77.249
OAT	14	201.29	172.76	106.244	266.301	340.504	274.857	120.319	61.67	467.006	313.513	185.305	94.934
PRRC2C	14	379.868	322.442	138.261	259.705	683.067	574.998	63.755	63.241	673.029	535.2	113.013	105.072
RBM15B	14	277.245	288.603	124.138	181.656	303.07	316.393	66.153	63.933	468.684	438.683	99.291	110.098
RBM4	14	243.906	244.671	136.501	307.522	343.119	324.716	80.978	85.396	579.116	560.211	125.539	135.778
RBMS1	14	753.301	784.05	596.422	712.406	1204.36	1240.88	70.005	78.306	1601.72	1440.57	113.59	135.526
RBMX	14	396.98	338.567	291.074	299.689	548.452	465.08	70.555	83.334	509.151	408.567	106.629	121.895
SPEN	14	156.08	264.115	247.326	241.293	215.59	307.934	74.448	72.937	166.073	208.055	119.118	111.973
TOMM40	14	425.902	458.202	268.63	337.732	722.35	718.648	67.581	80.073	834.199	751.836	104.762	141.03
VARS	14	149.338	164.495	133.888	152.749	148.872	148.11	60.005	65.42	145.316	149.952	83.51	102.933
VCP	14	68.543	99.282	67.212	59.244	93.11	117.551	58.881	57.748	107.553	130.023	76.817	75.138
VWA8	14	186.201	232.212	163.49	220.635	250.684	304.406	60.089	60.459	316.12	356.022	86.809	86.885
AFG3L2	15	229.326	171.502	172.604	142.6	255.917	218.534	61.415	61.479	300.875	264.19	85.741	82.697
CTRL	15	392.165	202.429	281.467	264.633	638.313	273.081	73.127	63.488	767.925	402.44	126.505	100.257
DHX30	15	498.322	433.877	320.142	304.745	890.389	819.354	71.747	78.62	1132.13	1066.67	121.747	140.643
DLD	15	407.655	304.473	122.87	173.544	946.929	729.446	64.374	76.817	1252.95	805.758	93.701	132.841
GCDH	15	485.273	444.382	295.302	383.257	1017.33	940.412	76.054	82.262	1771.92	1364.56	138.189	139.518
HADHA	15	251.438	339.525	265.693	230.014	331.954	423.703	60.983	57.698	209.058	258.873	90.334	79.783
HINT2	15	387.439	376.233	293.094	100.492	622.414	495.064	64.757	54.585	895.609	592.667	109.3	84.694
HSD17B10	15	643.795	583.345	271.015	513.666	964.921	795.559	75.006	70.148	1504.02	1169.43	131.43	130.578
MTHFD1L	15	356.781	188.799	228.825	179.383	428.679	163.703	75.286	63.957	454.902	162.56	125.626	96.602
MUT	15	458.47	190.715	181.504	148.282	578.822	324.902	70.244	62.45	975.965	510.335	114.693	91.769
OAT	15	374.149	349.589	125.754	236.833	524.28	436.826	60.706	67.116	702.108	496.164	88.054	98.442
PRRC2C	15	296.362	267.126	281.309	328.732	499.433	495.311	72.992	58.799	558.474	598.42	128.349	88.02
RBM15B	15	377.353	437.006	406.359	401.321	426.628	429.416	85.785	77.006	693.652	572.283	150.596	140.583
RBM4	15	489.048	608.133	384.096	539.078	562.602	856.455	80.98	75.12	1231.04	1793.66	139.79	144.198
RBMS1	15	788.466	1043.88	634.706	179.85	1167.65	1288.64	77.718	77.315	2150.1	1699.52	143.32	147.039
RBMX	15	260.437	317.093	353.973	316.703	353.568	367.238	87.922	72.443	355.681	345.777	152.674	123.234
SPEN	15	220.1	374.515	378.362	351.181	276.164	335.199	82.671	73.303	195.649	237.739	149.67	115.671
TOMM40	15	499.275	302.251	490.516	446.41	793.058	511.876	77.305	71.362	945.878	648.511	136.982	121.632
VARS	15	162.483	240.057	165.509	169.699	155.167	159.319	63.75	64.79	167.208	166.442	98.995	99.005
VCP	15	89.366	98.775	70.046	73.366	104.999	126.728	56.824	56.282	125.601	163.988	88.21	76.039
VWA8	15	814.558	450.233	218.805	215.35	655.06	545.203	70.692	64.231	1377.55	850.446	109.494	98.238
CTRL	16	195.172		66.889	101.008	514.696		56.154	57.632	427.049		84.259	84.11
DICER1	16	67.243	56.464	39.801	43.989	153.303	105.806	53.389	60.613	138.302	112.727	71.873	81.007
DOCK2	16	126.186	93.845	91.284	93.003	168.854	146.567	52.478	54.928	141.003	113.422	72.66	80.219
eRF1	16	179.897	156.233	40.281	40.333	292.048	263.469	61.923	63.159	202.931	189.145	95.107	86.284
FTO	16	113.204	205.684	37.458	51.322	213.673	170.214	52.976	53.397	177.242	172.958	69.335	74.302
METTL14	16	163.537		31.417	29.579	176.74		52.874	51.82	152.36		68.262	66.618
METTL3	16	161.514	174.606	218.323	77.704	306.505	186.133	54.307	57.832	207.688	164.695	73.138	77.404
NCBP1	16	39	36.424	31.838	29.894	68.801	61.58	52.914	49.985	77.603	77.204	66.606	63.87
SLIRP	16	219.52	97.135	142.186	135.982	391.834	165.305	59.24	54.975	342.964	159.302	82.312	75.263
UPF2	16	214.698	126.662	122.656	260.737	279.664	159.368	66.35	69.613	368.572	221.513	93.104	114.163
UPF3A	16	138.944	127.707	44.914	64.614	224.093	208.396	54.06	56.984	206.976	221.879	71.162	83.465
UPF3B	16	101.538	47.433	35.965	46.154	117.215	78.102	56.251	56.766	139.92	95.963	77.037	78.765
CTRL	17	83.13	59.184	39.994	46.435	144.175	123.661	52.923	52.251	133.638	106.338	71.619	69.067
DICER1	17	46.507	37.297	30.198	32.973	70.292	62.904	51.548	49.41	86.153	75.662	62.157	63.67
DOCK2	17	269.498	46.688	46.049	68.67	170.261	66.02	52.171	53.534	174.863	70.851	67.291	67.609
eRF1	17	40.17	44.551	34.636	39.36	69.083	74.19	56.463	50.025	82.938	84.405	71.633	69.041
FTO	17	40.089	45.619	36.726	42.488	69.334	97.439	52.231	55.646	79.682	100.469	70.517	76.789
METTL14	17	80.688	59.408	54.984	44.348	72.814	68.308	50.018	51.881	81.655	82.008	65.751	66.981
METTL3	17	64.47	51.775	57.899	71.097	128.107	94.264	52.583	51.959	103.931	95.187	68.758	70.921
NCBP1	17	41.086	34.692	35.524	33.739	78.95	65.55	56.29	53.136	81.463	75.79	68.557	70.994
RBM12B	17	111.445	34.948	48.521	55.328	110.698	57.055	53.846	52.524	140.505	75.966	71.016	71.709
RBM12B	17	111.445	34.948	48.521	55.328	110.698	57.055	53.846	52.524	140.505	75.966	71.016	71.709
SLIRP	17	70.671	47.07	80.172	128.002	108.056	63.277	59.647	57.479	103.988	72.733	83.879	89.337
UPF2	17	82.154	82.259	32.393	37.758	129.269	128.41	51.555	52.997	148.902	151.153	71.753	65.296
UPF3A	17	77.441	137.1	61.505	76.054	134.508	161.094	52.704	59.178	120.2	151.525	68.851	74.315
UPF3B	17	80.504	43.388	31.992	51.19	99.877	70.246	53.804	55.708	124.694	93.913	70.275	79.892
ACSF3	18	355.029	309.948	267.822	458.373	286.353	272.515	56.431	55.013	79.225	78.09	26.237	25.267
ACSF3	19	498.739	314.562	311.273	338.558	302.751	241.785	56.263	58.833	104.793	87.553	29.597	29.893
BCAS2	18	633.168	138.962	175.511	293.37	375.842	128.954	59.526	61.675	90.049	37.977	27.262	26.845
BCAS2	19	329.474	256.691	231.019	355.156	218.956	166.087	54.299	54.139	58.918	44.654	26.822	28.659
CAPRIN	18	317.723	197.131	199.565	209.547	193.018	147.033	58.468	63.252	47.202	47.684	29.218	28.37
CAPRIN	19	424.594	177.133	141.869	170.714	238.371	112.751	56.744	53.8	63.886	39.608	26.785	27.905
COPG2	18	298.025	146.393	167.305	420.078	196.961	102.907	58.168	57.963	68.479	44.98	28.906	29.171
COPG2	19	110.125	338.306	335.548	277.769	82.614	170.627	58.342	53.068	38.508	77.363	29.558	25.968
COX5A	18	215.92	117.102	102.442	138.01	234.884	134.802	54.877	58.306	42.444	33.852	26.575	26.628
COX5A	19	259.959	149.81	119.666	110.435	333.416	183.079	55.308	51.9	59.667	45.732	28.848	26.732
EPRS	18	150.821	91.367	109.234	111.341	108.807	83.429	51.802	50.76	33.138	30.492	26.006	25.781
EPRS	19	193.294	86.048	73.106	100.833	106.602	75.639	49.373	49.664	35.999	33.205	26.519	26.493
HNRNPA2B1	18	168.138	113	153.083	127.872	132.909	92.865	55.595	52.949	41.218	35.781	26.423	26.249
HNRNPA2B1	19	251.585	131.13	145.785	95.185	164.543	108.376	55.475	49.649	58.682	42.982	27.353	25.608
HNRNPL	18	212.609	159.771	237.769	168.047	101.844	88.926	60.562	53.501	32.915	32.61	27.187	26.614
HNRNPL	19	104.175	136.2	119.185	121.338	72.955	78.74	54.849	57.649	32.143	35.308	27.732	27.355
IDH3B	18	310.721	413.624	128.197	288.777	231.922	295.623	49.167	56.49	56.78	67.977	25.943	26.998
IDH3B	19	165.001	100.746	81.791	218.101	135.444	88.284	48.522	51.794	45.306	34.251	26.134	27.935
MOV10	18	141.316	101.925	101.295	128.441	93.784	80.736	64.061	50.305	32.967	32.099	29.083	25.637
MOV10	19	93.016	83.746	96.944	68.033	72.174	70.997	51.621	48.356	29.722	32.193	26.341	25.148
MRPS9	18	173.663	197.126	162.791	155.179	303.692	303.692	56.345	48.261	82.235	93.034	26.556	24.872
MRPS9	19	368.675	117.227	203.561	159.646	376.865	176.146	60.217	54.69	120.07	83.483	30.924	29.509
NXF1	18	46.477	67.605	46.581	39.908	50.331	53.555	49.629	48.081	27.528	27.646	25.083	25.117
NXF1	19	65.096	44.402	45.582	35.759	49.911	53.036	51.455	48.188	29.74	27.861	25.917	24.474
SEPT2	18	503.725	374.941	292.475	240.392	366.672	269.689	59.57	47.693	87.626	67.371	27.413	24.816
SEPT2	19	276.927	211.114	247.297	311.471	185.013	224.293	55.245	58.419	56.001	80.942	28.017	29.288
TARS2	18	255.403	202.991	190.922	178.595	232.685	193.849	53.664	54.625	52.832	45.998	26.419	27.141
TARS2	19	476.089	164.751	188.483	193.241	387.555	198.126	60.765	55.693	77.436	60.976	28.527	28.334
TGM3	18	261.501	421.214	330.735	350.872	245.662	344.528	55.604	50.935	55.935	79.724	28.741	27.86
TGM3	19	455.472	210.555	245.04	146.395	454.602	206.837	52.94	52.535	89.828	54.025	27.999	27.484
TUFM	18	276.183	221.957	219.739	173.503	235.166	254.048	64.701	105.519	52.047	61.713	28.967	36.618
TUFM	19	355.105	187.551	130.03	154.961	261.537	195.814	55.491	57.27	75.801	64.155	26.355	28.142
U2AF1	18	101.412	79.174	90.974	116.561	59.324	55.649	51.805	52.827	33.238	30.822	25.794	26.949
U2AF1	19	179.943	81.702	109.805	81.138	65.876	55.061	52.108	50.788	45.459	33.323	27.055	26.171
UBAP2L	18	240.09	171.497	141.581	236.759	177.088	138.448	52.196	59.179	49.267	42.406	28.028	30.96
UBAP2L	19	252.647	147.931	125.505	156.099	172.515	106.862	52.508	54.373	49.799	38.956	27.132	28.091
YBX1	18	276.693	296.301	299.988	320.965	369.615	406.43	55.087	56.29	54.54	65.371	28.23	29.538
YBX1	19	282.551	259.085	194.865	217.275	387.736	365.896	53.866	69.582	55.894	58.096	26.22	27.448
YBX3	18	114.509	142.636	104.925	92.757	193.423	221.786	53.027	50.859	49.735	52.418	25.894	25.538
YBX3	19	184.445	116.616	112.421	165.115	272.482	240.385	52.174	52.77	74.613	113.592	27.174	26.997

## Sheet: summary of pvalues_%diffs
Figure 3-source data 1: siRNA knockdown screen; fluorescence data for early and late HIV gene expression; cell viability calculations, statistical calculations for changes in expression.
siRNA	M p-value	C p-value	C/M p-value	M % diff	C % diff	C/M % diff
AARS2	0.0114204	0.000686314	0.00118039	-33.8327	-65.948	-54.3035
ACACA	0.0793087	0.0453332	0.0467849	-12.2587	-33.6871	-25.1373
ACSF3	0.000567517	0.169048	0.00536814	-32.3095	-15.3688	25.5316
AFG3L2	0.036292	0.114988	0.791168	-26.834	-26.5905	-2.89618
AGO1	0.096828	0.514025	0.0628076	-24.2153	-12.6567	13.7299
ALDH4A1	0.00236164	0.108121	0.425128	-44.6762	-30.904	12.1876
ALOX12B	0.23676	0.0457951	0.0174925	-18.2038	-34.8672	-21.4394
ATP5F1	0.00111677	0.000676818	0.00231165	-47.0024	-66.9724	-45.6377
ATXN2L	0.00571066	0.034131	0.609124	-37.6166	-40.0363	-6.52323
BCAP31	0.361405	0.259791	0.537403	-59.7787	-94.966	-11.989
BCAS2	0.000127137	0.00100715	0.0902054	-45.7392	-56.246	-18.4103
BUB3	0.0545337	0.00384096	0.0386531	-24.7821	-46.3423	-26.1947
CAD	2.7497e-05	0.00225738	0.152103	-49.719	-61.2966	-25.708
CANX	0.261379	0.966529	0.519899	-17.5608	1.39413	13.4353
CAPRIN	4.19275e-05	0.000810065	0.307499	-54.8403	-60.008	-10.8946
CASP14	0.0335546	0.000995574	0.0177332	-27.5282	-48.6086	-27.8698
CLPX	0.763169	0.00466758	0.00239878	3.23339	-33.516	-41.1907
CNOT8	0.213909	0.0331172	0.0112493	-9.79927	-32.4497	-25.9296
COPG1	0.349274	0.309551	0.317381	-4.51739	16.5971	9.53273
COPG2	3.83288e-05	0.0121301	0.000490522	-62.2817	-37.1843	68.9163
COX5A	0.932324	0.00624025	0.000130276	-1.40439	-50.7793	-50.2873
CSDE1	0.203321	0.0495729	0.00577981	17.0802	82.0427	51.7642
CSE1L	4.18777e-05	0.000672537	0.153865	-70.6216	-74.4542	-19.8195
CSNK1A1	0.00494081	0.0134769	0.39564	-34.2093	-37.2368	-5.02318
DAZAP1	6.53196e-06	0.00239679	0.219947	-45.8738	-55.2459	-18.8441
DDX17	5.52379e-05	2.50713e-05	0.000487765	-51.476	-77.9712	-53.7376
DDX21	0.0559497	0.0163673	0.00913222	-26.1518	-43.2694	-23.8928
DDX3X	0.0267402	0.14518	0.0232647	-39.8333	-24.2523	31.3716
DHX30	0.002399	0.0111304	0.233556	41.6205	64.809	14.7709
DICER1	0.000597582	0.00628533	0.296849	-57.0222	-47.0409	38.0751
DLD	0.000321763	0.000346746	0.415324	67.4321	58.9239	-5.73239
DNM2	0.00689197	0.00621402	0.0335995	-39.9771	-51.6165	-21.3731
DOCK2	1.82617e-06	0.00313463	0.558115	-60.8075	-69.9005	-19.0079
DYNC1H1	0.000398806	0.00387024	0.0208817	-48.8625	-61.442	-24.2925
EIF3C	6.32049e-05	0.00199587	0.0148173	-54.6677	-67.9727	-29.2234
EPRS	0.00374111	0.00248763	0.0174933	-59.8167	-70.5274	-26.6254
eRF1	0.000605847	0.00025672	0.789187	-55.5719	-59.1738	-6.06064
ETFB	0.0563376	0.0372227	0.124742	-21.104	-27.551	-9.22898
FAM120A	0.0217145	0.000616122	0.00050906	-27.7533	-56.3107	-40.4912
FAM133B	0.00837902	0.0507295	0.183552	-27.9356	-22.8186	7.61539
FTO	0.00124571	0.0326268	0.649128	-62.1483	-52.7991	-7.13409
G3BP1	0.019198	0.00501355	0.0380302	-34.0655	-45.9639	-18.6483
GALNT2	0.831702	0.180201	0.000518568	4.52158	-24.7341	-27.8795
GANAB	0.0739611	0.245043	0.71586	17.6871	22.2298	3.01603
GBAS	0.00995076	0.752933	0.0368172	16.9119	1.50237	-21.0168
GCDH	0.00550298	0.000983803	0.0142721	46.3532	95.9949	32.8463
GRSF1	0.928851	0.805968	0.937238	1.85298	10.1011	-1.48767
GSDMA	0.0359189	0.0203607	0.000123508	-24.8749	42.4492	73.4325
H1F0	0.00968216	0.0249539	0.0838555	-30.1622	-36.5575	-18.7673
HADHA	0.979101	0.00318146	0.000421086	0.317564	-51.0307	-52.9694
HINT2	0.586328	0.891084	0.355796	-6.65668	1.69259	8.10694
HIST1H1B	0.00273472	0.00051172	0.00212083	-49.6928	-67.0028	-41.8903
HIST1H1D	0.0294424	0.000150721	0.000160095	13.5231	-56.9573	-65.6388
HIST1H1E	0.0285167	0.00853149	0.0135328	-31.3937	-47.9212	-31.929
HISTH1C	0.0118227	0.00581833	0.0901335	-29.599	-36.4774	-17.8101
HNRNPA2B1	0.000190263	0.00690678	0.0980608	-52.296	-44.6201	16.6785
HNRNPA3	0.00661677	0.00201844	0.564054	-35.7441	-40.8543	-5.33121
HNRNPK	9.52889e-05	7.77741e-05	0.000435087	-65.3772	-80.0161	-44.7879
HNRNPL	1.22205e-06	0.000151678	0.771465	-79.4787	-78.5045	5.31354
HNRNPR	0.0364439	0.00140803	0.0197035	-40.8571	-58.3806	-25.0962
HSD17B10	0.528351	0.0185628	0.0291755	5.26914	27.2079	19.4682
IDH2	0.010924	0.00247429	0.0100281	-51.9286	-63.6084	-31.5063
IDH3B	0.000229165	0.00186764	0.0392017	-42.6935	-50.8514	-14.2094
IGF2BP1	0.790656	0.0327497	0.000478097	-6.35428	-37.8092	-32.413
IGF2BP3	0.118847	0.0476589	0.0440353	-25.4556	-39.5065	-21.4209
ILF2	3.60512e-07	0.000145142	0.0534991	-52.9771	-63.0497	-21.4418
IPO4	0.513038	0.593248	0.98007	7.06984	6.74672	0.141546
KPNA2	0.0728099	0.208125	0.00824778	-15.6458	18.6783	41.1923
LARS	0.36265	0.0379509	0.00861197	-22.5822	-57.0651	-56.1952
LGALS9	0.569374	0.783211	0.370892	9.39072	10.5503	-13.2727
LOR	0.00791047	0.00262541	0.186532	-41.8443	-48.5655	-18.0575
LRPPRC	0.000304163	0.0348459	0.431417	45.4996	36.7004	-6.60014
MBNL1	0.3432	0.0447731	0.817233	-22.5532	-39.0499	-5.85431
MBOAT7	0.00219359	0.000936283	0.0520285	49.4228	95.2443	31.9594
MCCC1	0.212322	0.0524071	0.00432828	-23.6831	-39.9319	-22.8683
METTL14	3.82266e-05	0.00072063	0.371136	-72.8858	-68.1072	19.4776
METTL3	0.154032	0.0375467	0.240602	-20.4268	-34.8731	-17.8373
MRPL1	0.00652349	0.0197902	0.124777	-22.4816	-36.0477	-19.1487
MRPS31	0.00973242	0.0365455	0.248091	-18.1072	-25.8208	-9.37193
MRPS9	0.0157489	0.0218128	0.0703361	27.2742	76.724	39.6402
MTHFD1L	0.0439319	0.00569192	0.00928042	-36.208	-59.1302	-42.3342
MTHFD2	0.454726	0.103306	0.0283539	7.42468	-16.9643	-21.5033
MUT	0.532229	0.0305452	0.00650723	-8.16153	23.4082	34.0826
NCAPG	0.0077628	0.142983	0.558473	-35.849	-39.4976	-14.1653
NCBP1	0.00572602	0.00164025	0.350554	-59.5191	-71.6984	-10.5411
NCLN	0.0108877	0.0216917	0.262751	33.7243	80.9531	26.0939
NCOA5	0.00529619	0.318665	0.423909	-25.6964	-16.3954	11.3411
NUP155	0.163749	0.117748	0.0071449	24.4201	-23.9649	-38.2822
NUP54	4.79913e-06	2.93946e-05	2.54736e-05	-31.8333	-73.2588	-60.7009
OAT	0.215665	0.884393	0.481738	-12.2002	-2.0165	10.5527
PABPC1	1.60361e-07	0.00055315	0.127598	-57.2533	-49.8902	17.259
PABPN1	8.95503e-05	0.000112573	0.00355389	-43.6076	-69.3752	-45.226
PC	0.126835	0.371123	0.951565	-22.1715	-20.1929	-0.669419
PCCA	0.158844	0.4959	0.566959	-20.8764	-15.8965	-7.50167
PMPCB	0.0522493	0.00450359	0.00460784	-25.2546	-45.6213	-28.4737
PRRC2A	0.0777093	0.00908985	0.00664212	-20.752	-38.8546	-23.8742
PRRC2C	0.0527195	0.123862	0.239603	19.8227	10.8746	-8.18973
PSMD14	0.000411652	0.000551097	0.218368	-77.6274	-84.4258	-101.329
RBM15B	0.00489422	0.306128	0.0829326	-34.3572	-10.8672	35.6482
RBM4	0.14771	0.000787903	9.9183e-05	-17.2235	52.4399	84.27
RBMS1	0.566952	0.0497804	0.0426498	5.02694	38.6435	29.7386
RBMX	0.0556644	0.00549691	0.04662	-18.5983	-38.2508	-25.2483
RFC3	0.714376	0.216361	0.00191504	12.0681	-31.6965	-42.9802
RPL15	0.00374107	0.0216255	0.0105775	-73.0856	-58.3002	69.0583
RPL21	0.0020221	0.0656377	0.508501	-59.3271	-45.1872	15.9999
RPL29	0.180157	0.0782906	0.0825053	-34.1797	-47.8884	-24.9175
RPS17	0.00783569	0.00131634	0.00344781	-51.6115	-68.1027	-33.124
SBNO1	0.0129247	0.0047089	0.291498	-37.5079	-47.2108	-12.996
SCCPDH	0.0705926	0.0497869	0.0792221	-37.0988	-45.0025	-15.7252
SEPT2	0.0335286	0.277278	0.672574	-30.4281	-24.7604	4.68854
SF3B2	0.00135046	0.00655333	0.147984	-71.6172	-61.8076	50.8471
SLIRP	0.00193919	0.0127587	0.516385	-42.2259	-49.4665	-12.2039
SLTM	0.986992	0.680898	0.539826	-0.354852	13.186	7.35717
SON	0.805214	0.953478	0.313426	-10.5607	2.99095	10.093
SPEN	0.00473211	1.51394e-06	4.46901e-05	-35.6833	-77.23	-64.6097
SRP72	0.00284321	0.00500604	0.385661	-64.9925	-61.7528	13.583
SRRM2	0.00796369	0.222672	0.00119301	-62.9838	-29.7365	103.65
SRSF6	0.00260249	0.243436	0.00333613	-38.4056	14.9006	87.4954
STAU2	0.0163147	0.00267053	0.132263	-44.6974	-56.961	-17.7356
TARS2	0.146309	0.0693181	0.0412324	-16.6971	-35.3315	-23.7338
TCOF1	0.319891	0.293647	0.652162	-9.25317	-11.6957	-3.13358
TGM3	0.253989	0.00850309	0.0127355	-13.3842	-36.6327	-25.0392
TNPO1	0.406323	0.21743	0.525728	-21.65	-29.3948	36.6004
TOMM40	0.236769	0.0764964	0.688596	10.9662	15.6308	3.87529
TOP1	0.0858791	0.257008	0.766999	-36.6118	-30.7585	3.26943
TRA2A	0.0181979	0.00196695	0.787604	-50.611	-58.6157	-4.20526
TRIM56	0.0344318	0.0315372	0.526738	-47.7416	-52.1098	-7.54457
TUFM	0.0305418	0.11612	0.450733	-25.7095	-30.5277	-9.02655
U2AF1	0.00197186	0.0677315	0.00406088	-90.9207	-47.4107	473.731
UBAP2L	7.2494e-05	0.000578178	0.0203918	-49.047	-58.2953	-17.4205
UPF1	0.0042741	0.0017853	0.311679	-68.0772	-75.0562	-12.6039
UPF2	0.047682	0.917221	0.000286324	-41.1017	3.19468	73.7391
UPF3A	0.063331	0.0772374	0.234791	-30.251	-26.4037	14.8212
UPF3B	0.000968266	0.0528285	0.0731444	-64.4351	-47.5477	58.6852
VAPA	0.221297	0.199698	0.465872	-32.3917	-32.0283	13.513
VARS	0.000898495	1.69659e-05	0.00488401	-63.1527	-75.2594	-33.7508
VWA8	0.0280434	0.940633	0.0176334	-26.7516	0.32717	37.9889
YBX1	0.0207997	0.00391979	7.64598e-05	31.3924	-43.1258	-56.1598
YBX3	0.0492814	0.291199	0.657293	49.1489	82.6763	12.9599
YTHDC1	0.00508395	6.63227e-05	0.0015356	-50.6466	-77.9006	-51.2217
YTHDC2	0.00213766	0.00466495	0.49774	-55.4057	-51.3226	18.2144
YTHDF1	0.0211835	0.0204916	0.457158	-46.078	-44.6773	5.97226
YTHDF2	0.0011751	0.00324035	0.340043	-51.6436	-43.4929	23.6152
YTHDF3	0.000182977	5.82213e-05	0.620462	-72.8345	-74.3146	15.6288
ZNF326	0.000271955	0.000929904	0.509106	-58.2514	-55.1923	10.7314

## Sheet: Figure 4D
Figure 4D Data:
		Early (mCherry)	Late (CFP)	Bio Stdev M	Bio Stdev C
	CTRL	1	1	0	0
	HNRNPR	0.591429	0.416194	0.236239	0.143086
	FAM120A	0.722467	0.436893	0.0625456	0.11204
	IGF2BP3	0.745444	0.604935	0.303295	0.329625
	LRPPRC	1.455	1.367	0.00183206	0.0791205
	MBOAT7	1.49423	1.95244	0.142458	0.270737
