# Supplementary material for: Identification of host proteins differentially associated with HIV-1 RNA splice variants
Source: eLife. 2021 Feb 25;10:e62470. doi: 10.7554/eLife.62470 (PMC7906601; doi:10.7554/eLife.62470)
Supplement: Figure 4—source data 1. [file elife-62470-fig4-data1.xlsx]

## Sheet: Figure 4-source data 1
Figure 4-source data 1: Frequency of co-localization phenotypes observed. Related to Figures 4 and S3.
Protein	total # of infected cells evaluated	Co-Loc in Nucleus	Co-Loc Peri Nuc	Co-Loc in Cyto	Co-Loc at PM
CSDE1	41	3	12	38	12
DNM2	29	2	0	29	18
FAM120A	38	3	2	37	10
HNRNPR	41	33	17	37	13
IGF2BP3	45	2	0	44	21
LRPPRC	39	11	21	31	0
MBOAT7	47	27	43	43	0
MOV10	45	0	9	38	10
RBM4	23	22	0	17	4
RBMX	17	14	7	13	2
TRIM56	49	0	4	35	4
Protein	total # of infected cells evaluated	% Co-Loc in Nucleus	% Co-Loc Peri Nuc	% Co-Loc in Cyto	% Co-Loc at PM
RBMX	17	82.3529	41.1765	76.4706	50
HNRNPR	41	80.4878	41.4634	90.2439	68.4211
FAM120A	38	7.89474	5.26316	97.3684	83.3333
IGF2BP3	45	4.44444	0	97.7778	67.7419
DNM2	29	6.89655	0	100	100
MOV10	45	0	20	84.4444	83.3333
TRIM56	49	0	8.16327	71.4286	30.7692
RBM4	23	95.6522	0	73.913	100
MBOAT7	47	57.4468	91.4894	91.4894	0
LRPPRC	39	28.2051	53.8462	79.4872	0
CSDE1	41	7.31707	29.2683	92.6829	80

## Sheet: CSDE1
File Name	Cell # (top left to bottom right)	Infection Stage	Nuc Punct	Nuc punct z	PeriNuc	PeriNuc z	Cyto Puncta	cyto z	PM puncta present?	PM Puncta	PM z
190925_P2_100X_zstack_CSDE1001	1	late			x	1			yes	x	7/8
190925_P2_100X_zstack_CSDE1001	2	late							yes	x	3
190925_P2_100X_zstack_CSDE1001	3	early			x	15	x	2
190925_P2_100X_zstack_CSDE1001	4	late					x	1,2	yes	x	10
190925_P2_100X_zstack_CSDE1001	5	late			x	5	x	3	yes
190925_P2_100X_zstack_CSDE1001	6	early
190925_P2_100X_zstack_CSDE1002	7	late					x	12	yes
190925_P2_100X_zstack_CSDE1002	8	late	x	12			x	1*	yes	x	14
190925_P2_100X_zstack_CSDE1002	9	early			x	1	x	5
190925_P2_100X_zstack_CSDE1002	10	early			x	11	x	10
190925_P2_100X_zstack_CSDE1002	11	late					x	8	yes	x	3
190925_P2_100X_zstack_CSDE1003	12	early					x	9
190925_P2_100X_zstack_CSDE1003	13	early					x	2
190925_P2_100X_zstack_CSDE1003	14	early					x	2
190925_P2_100X_zstack_CSDE1003	15	early					x	3
190925_P2_100X_zstack_CSDE1003	16	early					x	1
190925_P2_100X_zstack_CSDE1003	17	early
190925_P2_100X_zstack_CSDE1003	18	early			x	10	x	10
190925_P2_100X_zstack_CSDE1003	19	early					x	1
190925_P2_100X_zstack_CSDE1004	22	early					x	1
190925_P2_100X_zstack_CSDE1004	23	late					x	1	yes	x	8,10
190925_P2_100X_zstack_CSDE1004	24	early					x	13
190925_P2_100X_zstack_CSDE1004	25	early					x	9
190925_P2_100X_zstack_CSDE1004	27	late			x	1	x	9	no
190925_P2_100X_zstack_CSDE1004	28	late	x?	1			x	3
190925_P2_100X_zstack_CSDE1005	29	late					x	4	no
190925_P2_100X_zstack_CSDE1005	30	early			x	2
190925_P2_100X_zstack_CSDE1005	31	late					x	5	yes
190925_P2_100X_zstack_CSDE1005	32	late					x	1
190925_P2_100X_zstack_CSDE1005	33	late			x	3	x	9
190925_P2_100X_zstack_CSDE1006	35	late					x	5	yes	x	12
190925_P2_100X_zstack_CSDE1006	36	late					x	1	yes	x	11
190925_P2_100X_zstack_CSDE1006	37	late	x	7**			x	5**, 1	no
190925_P2_100X_zstack_CSDE1006	38	late					x	5	yes	x	13
190925_P2_100X_zstack_CSDE1006	39	early					x	12
190925_P2_100X_zstack_CSDE1006	40	late					x	1	yes	x	12
190318_CSDE1_60X_zstack_2B	41	late			x	1	x	7, 13	yes	x	7
190318_CSDE1_60X_zstack_2B	42	late					x	1	yes	x	3
190318_CSDE1_60X_zstack_2B	43	early			x	3
190318_CSDE1_60X_zstack_2B	44	early					x	1
190318_CSDE1_60X_zstack_2B	45	early					x	3

## Sheet: DNM2
File	Cell #	Infection state	cyto punct	cyto punct z	PM punct present	PM punct co-loc	PM punct z	nuc punct	nuc punct z
190525_P2_100X_zstack_DNM2	1	early	x	1
190525_P2_100X_zstack_DNM2	2	late	x	8	yes	x	3
190525_P2_100X_zstack_DNM2	7	late	x	6**	yes	x	6**
190525_P2_100X_zstack_DNM2	8	late	x	6**	yes	x	6**
190925_P2_100X_zstack_DNM2002	9	late	x	3	no
190925_P2_100X_zstack_DNM2002	10	early	x	7
190925_P2_100X_zstack_DNM2002	11	late	x	4	yes	x	4
190925_P2_100X_zstack_DNM2002	15	late	x	6,7	yes	x	9
190925_P2_100X_zstack_DNM2002	16	late	x	11**no gag	yes	x	7**
190925_P2_100X_zstack_DNM2002	17	late	x	6	yes	x	15
190925_P2_100X_zstack_DNM2002	18	late	x	7	yes	x	7
190925_P2_100X_zstack_DNM2002	19	late	x	8	yes	x	4
190925_P2_100X_zstack_DNM2002	20	late	x	3	yes	x	3
190925_P2_100X_zstack_DNM2001	21	late	x	7	yes	x	5
190925_P2_100X_zstack_DNM2001	22	late	x	8	yes	x	8
190925_P2_100X_zstack_DNM2001	23	early	x	16				x	9
190925_P2_100X_zstack_DNM2001	25	late	x	10	yes	x	7
190925_P2_100X_zstack_DNM2001	26	early	x	3, no gag
190925_P2_100X_zstack_DNM2001	27	early	x	3, no gag				x	12
190925_P2_100X_zstack_DNM2001	28	early	x	with gag
190925_P2_100X_zstack_DNM2001	29	early	x	with gag
190925_P2_100X_zstack_DNM2001	30	late	x	2	no
190925_P2_100X_zstack_DNM2003	31	late	x	5	yes	x	1
190925_P2_100X_zstack_DNM2003	32	late	x	5	yes	x	5
190925_P2_100X_zstack_DNM2003	33	late	x	9	yes	x	6
190925_P2_100X_zstack_DNM2003	34	late	x	4, no gag	no
190925_P2_100X_zstack_DNM2003	37	late	x	4, no gag	no
190925_P2_100X_zstack_DNM2003	38	late	x	1, no gag	yes	x	9
190925_P2_100X_zstack_DNM2003	39	late	x	1	yes	x	14

## Sheet: FAM120A
File	Cell #	Infection state	nuc punct	nuc punct z	perinuc punct	perinuc punct z	cyto punct	cyto punct without Gag?	cyto punct z	PM punct present	PM punct coloc	PM punct z
190925_P2_100X_zstack_FAM120A	1	early					x		1
190925_P2_100X_zstack_FAM120A	2	early	x	2			x	x
190925_P2_100X_zstack_FAM120A	3	early					x		4
190925_P2_100X_zstack_FAM120A	4	early					x		6
190925_P2_100X_zstack_FAM120A	5	early					x		1
190925_P2_100X_zstack_FAM120A	6	early					x		3
190925_P2_100X_zstack_FAM120A	7	early					x	x	2
190925_P2_100X_zstack_FAM120A001	8	late					x	x	4
190925_P2_100X_zstack_FAM120A001	9	early					x		2
190925_P2_100X_zstack_FAM120A001	10	late					x	x	1
190925_P2_100X_zstack_FAM120A001	11	late					x	x1	1,2	yes	x	3
190925_P2_100X_zstack_FAM120A001	12	early					x		1
190925_P2_100X_zstack_FAM120A001	13	late					x	x	1,9
190925_P2_100X_zstack_FAM120A002	14	early					x		2
190925_P2_100X_zstack_FAM120A002	15	early					x		2
190925_P2_100X_zstack_FAM120A002	16	late					x	x	4
190925_P2_100X_zstack_FAM120A002	17	late					x	x	5,1,
190925_P2_100X_zstack_FAM120A002	18	late								yes	x	16, 1
190925_P2_100X_zstack_FAM120A002	19	late					x		1	yes
190925_P2_100X_zstack_FAM120A003	20	late					x	x	1
190925_P2_100X_zstack_FAM120A003	21	late					x		9*	yes	x	4
190925_P2_100X_zstack_FAM120A003	22	late					x	x	9*
190925_P2_100X_zstack_FAM120A004	23	early					x		2
190925_P2_100X_zstack_FAM120A004	24	late					x		1	yes	x	6
190925_P2_100X_zstack_FAM120A004	25	late					x	x	11
190925_P2_100X_zstack_FAM120A004	26	early					x		11
190925_P2_100X_zstack_FAM120A004	27	late					x	x	7	no
190925_P2_100X_zstack_FAM120A004	28	late					x	x	1	yes
190925_P2_100X_zstack_FAM120A004	29	late					x	x	5
190925_P2_100X_zstack_FAM120A004	30	late					x	x	1	yes	x	1, 4*
190319_FAM120A_60X_1B001	31	late	x	10			x	x	6	yes	x	8
190319_FAM120A_60X_1B001	32	late			x	4	x	x	5	no
190319_FAM120A_60X_1B001	33	late	x	7			x	x	12	no
190925_P2_100X_zstack_FAM120A005	34	early					x		1
190925_P2_100X_zstack_FAM120A005	35	late					x	x	10	yes	x	16
190925_P2_100X_zstack_FAM120A005	36	late					x	x	10	no
190925_P2_100X_zstack_FAM120A005	37	late					x		5	yes	x	7
190925_P2_100X_zstack_FAM120A005	38	late					x	x	12
190925_P2_100X_zstack_FAM120A005	39	late					x	x	6	yes	x	16
190925_P2_100X_zstack_FAM120A005	40	late					x		3	yes	x	8
190925_P2_100X_zstack_FAM120A005	41	late			x	14

## Sheet: G3BP1
File Name	Cell # (top left to bottom right)	Infection Stage	transcr. nuclear puncta	transcr. nuclear puncta z	small nuclear puncta	small nuclear puncta z	peri nuclear	peri nuclear x	Cyto puncta without Gag	Cyto puncta without Gag z	cyto puncta with Gag	cyto puncta with Gag z	PM puncta present?	PM puncta	PM puncta z
190809_G3BP1_P3001	1	late									x	1*
190809_G3BP1_P3004	2	late									x	8	yes
190809_G3BP1_P3004	3	late	x	13									yes	x	1
190809_G3BP1_P3004	4	late	x	1			x	1			x	14	yes	x	6
190809_G3BP1_P3004	5	late									x	4
190809_G3BP1_P3004	6	late					x	1			x	1
190809_G3BP1_P3004	7	late									x	3, 8
190809_G3BP1_P3006	8	late	x	6*			x	1*			x	1, 14
190809_G3BP1_P3006	9	late									x	5
190809_G3BP1_P3006	10	late					x	1			x	9	yes	x	1
190809_G3BP1_P3006	11	late	x	5							x	4, 7	yes	x	3
190809_G3BP1_P3007	12	late					x	1			x	1, 5
190809_G3BP1_P3007	13	late									x	5
190809_G3BP1_P3007	14	late									x	14	yes	x	18
190809_G3BP1_P3007	15	late									x	13, 14

## Sheet: HNRNPR
File	Cell #	Infection state	nuc punct	nuc punct z	perinuc punct	perinuc punct z	cyto punct without Gag?	cyto punct z	cyto punct with Gag?	cyto punct z	PM punct present	PM punct coloc	PM punct z	Comments
190925_P2_100X_zstack_HNRNPR	1	uninf
190925_P2_100X_zstack_HNRNPR	2	early	x	10
190925_P2_100X_zstack_HNRNPR	3	late			x	11					no
190925_P2_100X_zstack_HNRNPR	4	late	x	6	x	3	x	5			no
190925_P2_100X_zstack_HNRNPR	5	late			x	1	x	1			yes	x	1
190925_P2_100X_zstack_HNRNPR	6	late			x	1	x	9	x	1	yes	x	8
190925_P2_100X_zstack_HNRNPR001	7	early			x	16			x	1
190925_P2_100X_zstack_HNRNPR001	8	early	x	15					x	7
190925_P2_100X_zstack_HNRNPR001	9	early							x	3
190925_P2_100X_zstack_HNRNPR001	10	early
190925_P2_100X_zstack_HNRNPR001	11	late	x	9			x	1	x	2	no
190925_P2_100X_zstack_HNRNPR001	12	late	x	14			x	9			yes
190925_P2_100X_zstack_HNRNPR001	13	late	x	12	x	3	x	3	x	6	yes	x	12
190925_P2_100X_zstack_HNRNPR001	14	late					x	12	x	12	yes	x	6
190925_P2_100X_zstack_HNRNPR002	15	late	x	15			x	8	x	2	no
190925_P2_100X_zstack_HNRNPR002	16	late	x	15			x	8	x	3	yes	x	1
190925_P2_100X_zstack_HNRNPR002	17	late	x	17	x	1	x	6
190925_P2_100X_zstack_HNRNPR002	18	late	x	12	x	8	x	6	x	9	no
190925_P2_100X_zstack_HNRNPR002	19	late	x	15			x	4
190925_P2_100X_zstack_HNRNPR002	20	late	x	14	x	6	x	7	x	1	yes
190925_P2_100X_zstack_HNRNPR002	21	late					x	1			yes	x	1
190925_P2_100X_zstack_HNRNPR003	22	late	x	4					x	1	yes	x	1
190925_P2_100X_zstack_HNRNPR003	23	late	x	1**	x	5			x	5	yes	x	5
190925_P2_100X_zstack_HNRNPR003	24	late	x	9			x	3	x	3	yes	x	17
190925_P2_100X_zstack_HNRNPR003	25	late	x	11	x	5	x	5	x	11	no
190925_P2_100X_zstack_HNRNPR003	26	late	x	15	x	6			x	6	no
190925_P2_100X_zstack_HNRNPR003	27	late	x	11			x	1	x	11	no
190925_P2_100X_zstack_HNRNPR004	28	late	x	2			x	8			yes
190925_P2_100X_zstack_HNRNPR004	29	late	x	15	x	9	x	11	x	9	yes
190925_P2_100X_zstack_HNRNPR004	30	early	x	3***										***Other nuclear co-loc, smaller puncta near transcription site
190925_P2_100X_zstack_HNRNPR004	31	late	x	7	x	1			x	1	yes	x	9
190925_P2_100X_zstack_HNRNPR004	32	late	x	14					x	14
190925_P2_100X_zstack_HNRNPR004	33	late	x	8	x	10	x	14	x	3	yes	x	6
190925_P2_100X_zstack_HNRNPR004	34	late	x	3			x	11	x	6
190925_P2_100X_zstack_HNRNPR004	35	late	x	3, 17					x	1
190925_P2_100X_zstack_HNRNPR005	36	late	x	8			x	8	x	6	yes	x	12
190925_P2_100X_zstack_HNRNPR005	37	late	x	5	x	5	x	5	x	6	yes
190925_P2_100X_zstack_HNRNPR005	38	late	x	10			x	1	x	5	yes
190925_P2_100X_zstack_HNRNPR005	39	late	x	9			x	9	x	9	yes	x	9
190925_P2_100X_zstack_HNRNPR005	40	early	x	9
190925_P2_100X_zstack_HNRNPR005	41	early	x	12***	x	5			x	10				***Other nuclear co-loc, smaller puncta near transcription site
190925_P2_100X_zstack_HNRNPR005	42	early	x	16										***Other nuclear co-loc, smaller puncta near transcription site

## Sheet: IGF2BP3
File	Cell #	Infection state	nuc punct	nuc punct z	perinuc punct	perinuc punct z	cyto punct	cyto punct without Gag?	cyto punct z	PM punct present	PM punct coloc	PM punct z	large cyto granules	large cyto granules z
190925_P2_100X_zstack_IGF2BP3	1	late								yes	x	1
190925_P2_100X_zstack_IGF2BP3	2	late					x		2	yes
190925_P2_100X_zstack_IGF2BP3	3	late					x		4	yes	x	1
190925_P2_100X_zstack_IGF2BP3	4	late					x		2	no
190925_P2_100X_zstack_IGF2BP3	5	late								no
190925_P2_100X_zstack_IGF2BP3001	6	late					x		10	yes	x	6,7
190925_P2_100X_zstack_IGF2BP3001	7	early/late					x		9	no
190925_P2_100X_zstack_IGF2BP3001	8	early					x		10	no
190925_P2_100X_zstack_IGF2BP3001	9	late					x		9	no
190925_P2_100X_zstack_IGF2BP3002	10	late					x	x	1	yes	x	17
190925_P2_100X_zstack_IGF2BP3002							x		11
190925_P2_100X_zstack_IGF2BP3002	11	late					x		1	yes	x	2
190925_P2_100X_zstack_IGF2BP3002	12	late					x		1, 8	yes	x	4
190925_P2_100X_zstack_IGF2BP3002	13	early/late					x		1
190925_P2_100X_zstack_IGF2BP3003	14	late					x		6	yes	x	13
190925_P2_100X_zstack_IGF2BP3003	15	late					x		17	yes	x
190925_P2_100X_zstack_IGF2BP3003							x	x	13
190925_P2_100X_zstack_IGF2BP3003	16	late	x	6						yes	x	13
190925_P2_100X_zstack_IGF2BP3003							x	x	3, 12
190925_P2_100X_zstack_IGF2BP3003	17	late					x		10	yes
190925_P2_100X_zstack_IGF2BP3003							x	x	7
190925_P2_100X_zstack_IGF2BP3003	18	late					x		1	yes
190925_P2_100X_zstack_IGF2BP3003							x	x	6
190925_P2_100X_zstack_IGF2BP3003	19	late					x		8, 11	yes	x	8
190417_2B_IGF2BP3002	20	late					x	x	6
190417_2B_IGF2BP3002							x		8	yes
190417_2B_IGF2BP3002	21	late					x	x	6
190417_2B_IGF2BP3002							x		5
190417_2B_IGF2BP3002	22	late					x		14	yes	x	15
190417_2B_IGF2BP3002							x	x	14
190417_2B_IGF2BP3002	23	late					x		4	yes	x	13
190417_2B_IGF2BP3002							x	x	4
190417_2B_IGF2BP3002	24	late					x		1	yes
190417_2B_IGF2BP3002							x	x	1
190417_2B_IGF2BP3002	25	late					x	x	8	yes	x	8
190417_2B_IGF2BP3002							x	x	8
190417_2B_IGF2BP3002	26	late					x	x	1	yes	x	6, 9
190417_2B_IGF2BP3002
190319_IGF2BP3_60X_1B	27	late					x	x	1	no
190319_IGF2BP3_60X_1B
190319_IGF2BP3_60X_1B	28	late					x	x	14	no
190319_IGF2BP3_60X_1B
190319_IGF2BP3_60X_1B	29	late	x	14			x	x	10	yes
190319_IGF2BP3_60X_1B
190319_IGF2BP3_60X_1B	30	late											x	1
190925_P2_100X_zstack_IGF2BP3004	31	late					x		1	yes
190925_P2_100X_zstack_IGF2BP3004							x	x	3
190925_P2_100X_zstack_IGF2BP3004	32	late					x		11	yes	x	5
190925_P2_100X_zstack_IGF2BP3004							x	x	4
190925_P2_100X_zstack_IGF2BP3004	33	late					x		14	yes	x	6
190925_P2_100X_zstack_IGF2BP3004							x	x	1
190925_P2_100X_zstack_IGF2BP3004	34	late					x	x	1	yes	x	1
190925_P2_100X_zstack_IGF2BP3004							x		1
190925_P2_100X_zstack_IGF2BP3005	35	early					x		8
190925_P2_100X_zstack_IGF2BP3005
190925_P2_100X_zstack_IGF2BP3005	36	late					x		1	no
190925_P2_100X_zstack_IGF2BP3005							x	x	1
190925_P2_100X_zstack_IGF2BP3005	37	late					x		11	yes
190925_P2_100X_zstack_IGF2BP3005							x	x	11
190925_P2_100X_zstack_IGF2BP3006	38	late					x	x	2
190925_P2_100X_zstack_IGF2BP3006
190925_P2_100X_zstack_IGF2BP3006	39	late					x	x	10
190925_P2_100X_zstack_IGF2BP3006
190925_P2_100X_zstack_IGF2BP3006	40	late					x		6	yes
190925_P2_100X_zstack_IGF2BP3006							x	x	1
190925_P2_100X_zstack_IGF2BP3006	41	late					x		1	yes	x	1
190925_P2_100X_zstack_IGF2BP3006
190919_P2_zstack_IGF2BP3001	42	late					x		7	yes	x	15
190919_P2_zstack_IGF2BP3001							x	x	1
190919_P2_zstack_IGF2BP3001	43	late					x		2	yes	x	1
190919_P2_zstack_IGF2BP3001
190919_P2_zstack_IGF2BP3001	44	late					x	x	3	yes	x	6
190919_P2_zstack_IGF2BP3001							x		17
190919_P2_zstack_IGF2BP3001	45	late					x		6	yes
190919_P2_zstack_IGF2BP3001							x	x	1

## Sheet: LRPPRC
File	Cell #	cell location	Infection state	nuc punct	nuc punct z	Description	perinuc	perinuc punct z	Description	cyto punct	cyto punct z	Description
190925_P2_100X_zstack_LRPPRC	1	top middle	late	x	7-13	two puncta, perinuclear/nuclear LRPPRC tendrels near/surround puncta
190925_P2_100X_zstack_LRPPRC	2	middle right	late				x	1	"scorpio"-looking co-loc: gRNA puncta partially overlapped with LRPPRC signal that then stretches away from the puncta.	x	1	"scorpio"-looking co-loc: gRNA puncta partially overlapped with LRPPRC signal that then stretches away from the puncta.
190925_P2_100X_zstack_LRPPRC	3	bottom right	late				x			x
190925_P2_100X_zstack_LRPPRC001	4	middle left	late							x	11	trio and dublet of gRNA; each with LRPPRC co-loc
190925_P2_100X_zstack_LRPPRC001	5	bottom right	late				x	6	bright gRNA puncta with surrounding LRPPRC
190925_P2_100X_zstack_LRPPRC002	6	bottom left	late							x	6
190925_P2_100X_zstack_LRPPRC002	6	bottom left	late							x	7	puncta engulfed by LRPPRC
190925_P2_100X_zstack_LRPPRC002	7	top left	late							x	9
190925_P2_100X_zstack_LRPPRC003	8	middle left	earlyish				x	6
190925_P2_40X_zstackLRPPRC_Inf	9	top left	late	x	6	small puncta with arms of LRPPRC connecting to nucleus periphery				x	7
190925_P2_40X_zstackLRPPRC_Inf	10	top left (2)	late	x	6	small puncta with arms of LRPPRC connecting to nucleus periphery
190925_P2_40X_zstackLRPPRC_Inf	11	bottom right	early	x	13	small puncta;
190925_P2_40X_zstackLRPPRC_Inf	12	middle right	early				x	8
190925_P2_40X_zstackLRPPRC_Inf001	13		late				x	26		x	15
190925_P2_40X_zstackLRPPRC_Inf001	14		late	x	20	transcription puncta, adjacent LRPPRC puncta/chain, leads to nuclear periphery	x	11, 12
190925_P2_40X_zstackLRPPRC_Inf001	15		late
190925_P2_40X_zstackLRPPRC_Inf001	16		late				x	12, 13
190925_P2_40X_zstackLRPPRC_Inf001	17		late				x	17		x	17
190925_P2_40X_zstackLRPPRC_Inf001	18		late							x	17
190925_P2_40X_zstackLRPPRC_Inf001	19		late				x	11, 27
190925_P2_40X_zstackLRPPRC_Inf001	20		late				x	11, 27		x	13, 15
190925_P2_40X_zstackLRPPRC_Inf001	21	***center cell!!	late	x	16-23***	large puncta on edge/bottom of nucleus, 1 z-frame above is large LRPPRC puncta that leads to the periphery of the nucleus	x	10***		x	13***	bright puncta
190925_P2_40X_zstackLRPPRC_Inf001	22		late	x	12-16	nuclear puncta, LRPPRC chain to periphery	x	16
190925_P2_40X_zstackLRPPRC_Inf001	23		late
190925_P2_40X_zstackLRPPRC_Inf001	24		late
190925_P2_40X_zstackLRPPRC_Inf001	25		late	x	12-15
190925_P2_40X_zstackLRPPRC_Inf001	26		late							x	17
190925_P2_40X_zstackLRPPRC_Inf001	27		late							x	14
190925_P2_40X_zstackLRPPRC_Inf001	28		late
190925_P2_40X_zstackLRPPRC_Inf001	29		early				x	12		x	16
190925_P2_40X_zstackLRPPRC_Inf001	30		early				x	27
190925_P2_40X_zstackLRPPRC_Inf001	31		early							x	13
190925_P2_40X_zstackLRPPRC_Inf001	32		early							x	13
190925_P2_40X_zstackLRPPRC_Inf001	33		early
LRPPRC_P5A (confocal?)	34		late	x	10	small but bright puncta	x	12, 17	many! In many slices	x	11	many
LRPPRC_P5A (confocal?)	35		late				x	4		x	11
LRPPRC_P5A001 (confocal?)	36		late				x	19		x	19
LRPPRC_P5A001 (confocal?)	37		late				x	6		x	5, 7
RKS145_P5A_LRPPRC_W1010	38		late	x	5-7***	long trail of LRPPRC leading to two gRNA puncta	x	5		x	9
RKS145_P5A_LRPPRC_W1010	39		late	x	5-8	arm/hand leading from puncta to periphery	x	6		x	6

## Sheet: MBOAT7
File Name	Cell # (top left to bottom right)	Infection stage (early-low gRNA in cyto; late-high gRNA in cyto)	gRNA Nuc puncta present (yes/no)	Nuc puncta (transcription site)	Other Nuc puncta (small)	Perinuclear Puncta	Cytoplasmic Puncta				Total cells	Cells with gRNA nuc punc	Nuc puncta (transcription site)	Other Nuc puncta (small)	Perinuclear Puncta	Cytoplasmic Puncta	% Nuc puncta (transcription site)	% Other Nuc puncta (small)	% Perinuclear Puncta	% Cytoplasmic Puncta
190919_P2_zstack_MBOAT7	1	early	yes	1		1				Early	60	22	15	6	44	27	68.1818	10	73.3333	45
190919_P2_zstack_MBOAT7004	2	late	yes			1				Late	27	25	10	6	26	20	40	22.2222	96.2963	74.0741
190919_P2_zstack_MBOAT7	3	early	yes	1		1					87	47	25	12	70	47	53.1915	13.7931	80.4598	54.023
190919_P2_zstack_MBOAT7004	4	late	yes		1	1	1
190919_P2_zstack_MBOAT7	5	early	yes			1	1
190919_P2_zstack_MBOAT7	6	early	yes	1	1	1
190919_P2_zstack_MBOAT7	7	early	yes	1	1	1	1
190919_P2_zstack_MBOAT7004	8	late	yes	1	1	1	1
190919_P2_zstack_MBOAT7	9	early	yes	1	1	1	1
190919_P2_zstack_MBOAT7004	10	late	yes	1		1	1
190919_P2_zstack_MBOAT7004	11	late	yes		1	1	1
190919_P2_zstack_MBOAT7	12	early	yes	1			1
190919_P2_zstack_MBOAT7001	13	early	yes			1
190919_P2_zstack_MBOAT7001	14	early	yes			1	1
190919_P2_zstack_MBOAT7004	15	late	yes			1	1
190919_P2_zstack_MBOAT7001	16	early	yes	1		1	1
190919_P2_zstack_MBOAT7001	17	early	yes			1	1
190919_P2_zstack_MBOAT7004	18	late	yes		1	1	1
190919_P2_zstack_MBOAT7005	19	late	yes	1		1	1
190919_P2_zstack_MBOAT7005	20	late	yes	1	1	1	1
190919_P2_zstack_MBOAT7005	21	late	yes			1
190919_P2_zstack_MBOAT7002	22	early	yes			1
190919_P2_zstack_MBOAT7002	23	early	yes	1	1	1
190919_P2_zstack_MBOAT7002	24	early	yes	1
190919_P2_zstack_MBOAT7002	25	early	yes	1		1
190919_P2_zstack_MBOAT7005	26	late	yes			1
190919_P2_zstack_MBOAT7002	27	early	yes	1
190919_P2_zstack_MBOAT7005	28	late	yes	1		1	1
190919_P2_zstack_MBOAT7002	29	early	yes	1		1
190919_P2_zstack_MBOAT7005	30	late	yes	1		1
190919_P2_zstack_MBOAT7005	31	late	yes			1	1
190919_P2_zstack_MBOAT7003	32	early	yes			1	1
190919_P2_zstack_MBOAT7005	33	late	yes			1	1
190919_P2_zstack_MBOAT7005	34	late	yes	1	1	1	1
190919_P2_zstack_MBOAT7003	35	early	yes			1
190919_P2_zstack_MBOAT7003	36	early	yes	1		1
190919_P2_zstack_MBOAT7003	37	early	yes			1
190919_P2_zstack_MBOAT7005	38	late	yes			1	1
190919_P2_zstack_quantMBOAT7001	39	late	yes			1	1
190919_P2_zstack_quantMBOAT7001	40	late	yes	1		1	1
190919_P2_zstack_quantMBOAT7001	41	late	yes
190919_P2_zstack_quantMBOAT7002	42	late	yes	1		1
190919_P2_zstack_quantMBOAT7002	43	late	yes			1	1
190919_P2_zstack_quantMBOAT7002	44	late	yes	1		1	1
190919_P2_zstack_MBOAT7004	45	early	yes	1		1	1
190919_P2_zstack_quantMBOAT7002	46	late	yes			1
190919_P2_zstack_quantMBOAT7003	47	late	yes			1	1

## Sheet: MOV10
File Name	Cell # (top left to bottom right)	Infection Stage	Cyto Puncta	cyto z	PM puncta present?	PM Puncta	PM z	PeriCyto Punct	Peri z
190919_P2_zstack_MOV10001	1	late
190919_P2_zstack_MOV10001	2	late	x	1	yes	x	8
190919_P2_zstack_MOV10001	3	early	x	4
190919_P2_zstack_MOV10001	4	late	x	7	yes	x?	13	x	4
190919_P2_zstack_MOV10001	5	late	x	1	yes	many	8,2
190919_P2_zstack_MOV10	6	late	many	2	no
190919_P2_zstack_MOV10	7	early	x	12	no
190919_P2_zstack_MOV10	8	early	x couple	6	no
190919_P2_zstack_MOV10	9	late	many*	10	no
190919_P2_zstack_MOV10	10	late	many**	10	no
190919_P2_zstack_MOV10	11	early	x	3	no
190919_P2_zstack_MOV10	12	early	x	2	no
190919_P2_zstack_MOV10	13	early
190919_P2_zstack_MOV10002	14	late	x	7	yes	x*	1
190919_P2_zstack_MOV10002	15	early	x	10	no
190919_P2_zstack_MOV10002	16	late	x	1	yes	x	6
190919_P2_zstack_MOV10002	17	late	x	1	no
190919_P2_zstack_MOV10002	18	early	x	5	no			x	7*
190919_P2_zstack_MOV10002	19	late	x	7	yes	x	11
190919_P2_zstack_MOV10002	20	early	x	1	no
190919_P2_zstack_MOV10002	21	early						x	1	Weird co-loc with P-body
190919_P2_zstack_MOV10003	22	late	x	11	no					Weird co-loc with P-body
190919_P2_zstack_MOV10003	23	early
190919_P2_zstack_MOV10003	24	early						x	12
190919_P2_zstack_MOV10003	25	early
190919_P2_zstack_MOV10003	26	late	x	12
190919_P2_zstack_MOV10003	27	early						x	8
190919_P2_zstack_MOV10003	28	early
190919_P2_zstack_MOV10003	29	late	x*	6	yes
190919_P2_zstack_MOV10004	30	early						x	6
190919_P2_zstack_MOV10004	31	late	x	1	no
190919_P2_zstack_MOV10004	32	late	x	1	yes	x	1
190919_P2_zstack_MOV10004	33	early	x	4	yes	x	5	x	4
190919_P2_zstack_MOV10004	34	late	x	5	yes	x**	4
190919_P2_zstack_MOV10004	35	early	x	10
190919_P2_zstack_MOV10004	36	early
190919_P2_zstack_MOV10004	37	early	x	4
190919_P2_zstack_MOV10004	38	early	x	6				x	6
190919_P2_zstack_MOV10004	39	late	x	2, 6	yes	x	1
190919_P2_zstack_MOV10005	40	early	x	3	yes (incoming?)	x	3	x	4
190919_P2_zstack_MOV10005	41	late	x	3	yes	x	5
190919_P2_zstack_MOV10005	42	late	x	2	yes
190919_P2_zstack_MOV10005	43	late	x	2	no
190919_P2_zstack_MOV10005	44	early			yes?
190919_P2_zstack_MOV10005	45	early	x	10

[truncated: 3 more sheets: RBM4, RBMX, TRIM56]
