# Supplementary material for: Identification of host proteins differentially associated with HIV-1 RNA splice variants
Source: eLife. 2021 Feb 25;10:e62470. doi: 10.7554/eLife.62470 (PMC7906601; doi:10.7554/eLife.62470)
Supplement: Figure 5—source data 1. [file elife-62470-fig5-data1.xlsx]

## Sheet: Figure 5-source data 1
Figure 5-source data 1: Quantitation of expression and distribution changes of host proteins in early and late stages of HIV infection. Related to Figures 5 and S5.
"HIV RNA Correlation" tabs: display the raw single cell fluorescence data; the plots shown are analogous to those described in the legend of Figure 5.
"Outliers" tabs: displays the calculations for determining outliers as described in the methods section "Quantiation of HIV RNA, Gag, and Host Protein Immunofluorescence".
"Exp and Dist Changes" tabs: displays the statistical analysis for determining significant changes in protein expression or cellular distribuition as described in the legend of Figure 5.

## Sheet: Sum. of Exp and Dist Results
	p-values					% Difference
Host Protein	total	nuclear	cytoplasmic	perinuclear	N/C	total	nuclear	cytoplasmic	perinuclear	N/C
CSDE1	0.0537055	0.0594521	0.220333		0.0955351	18.3025	22.4761	1.64666		8.52333
DNM2	0.574311	0.777539	0.334035		0.595249	-0.802368	2.85674	3.89937		-5.33889
FAM120A	0.953332	0.332836	0.455133		0.0934615	2.00488	9.56125	3.49195		-11.8687
HNRNPR	0.222268	0.949378	0.0548264		5.02114e-11	5.59278	-2.56245	20.6411		-51.924
IGF2BP3	0.153967	0.465136	0.00445694		0.0901886	7.73958	7.50697	26.0774		-12.7766
LRPPRC	0.614169	0.0875548	0.591822		0.688112	-7.42642	-32.1474	2.05735		-16.9442
MBOAT7	0.000809013	0.00243676	2.92929e-05	0.0027514	7.12881e-06	32.0548	29.5274	40.2656	25.8423	-27.4326
MOV10	0.0690513	0.0410652	0.113534		0.16442	-8.17153	-15.1809	-5.4234		-5.54192
RBM4	0.873225	0.939485	0.11545		0.0029476	8.84211	2.58999	24.4212		-22.9856
RBMX	0.0342487	0.390483	0.000640356		1.47267e-05	8.57106	2.21224	27.08		-21.1529
SRRM2	0.0694669	0.0583256	0.401089		0.00975902	20.7983	20.0954	0.92097		33.582
TRIM56	0.0124936	0.998145	0.0252473		0.00106332	15.5947	-4.58401	14.032		-32.6761
						% Difference
					Host Protein	total	nuclear	cytoplasmic	perinuclear	N/C
					TRIM56	15.5947		14.032		-32.6761
					RBMX	8.57106		27.08		-21.1529
					MOV10		-15.1809
					MBOAT7	32.0548	29.5274	40.2656	25.8423	-27.4326
					IGF2BP3			26.0774
						% Difference
					Host Protein	total	nuclear	cytoplasmic	perinuclear	N/C
					TRIM56	15.5947		14.032		-32.6761
					SRRM2					33.582
					RBMX	8.57106		27.08		-21.1529
					RBM4					-22.9856
					MBOAT7	32.0548	29.5274	40.2656	25.8423	-27.4326
					HNRNPR					-51.924

## Sheet: Sum. of Correlation Results
	Total Early		Total Late		Nuc Early		Nuc Late		Cyto Early		Cyto Late		N/C Early		N/C Late		PeriNuc Early		PeriNuc Late
	R	R^2	R	R^2	R	R^2	R	R^2	R	R^2	R	R^2	R	R^2	R	R^2	R	R^2	R	R^2
CSDE1	0.559143	0.3126	0.374748	0.1404	0.439231	0.1929	0.44714	0.1999	0.595183	0.3542	0.1438	0.0207	-0.137326	0.0189	0.360752	0.1301
DNM2	0.452408	0.2047	0.511176	0.2613	0.450877	0.2033	0.580399	0.3369	0.489507	0.2396	0.617641	0.3815	-0.235009	0.0552	-0.513904	0.2641
FAM120A	0.449539	0.2021	0.542166	0.2939	0.311786	0.0972	0.560621	0.3143	0.688775	0.4744	0.574166	0.3297	-0.323464	0.1046	-0.424018	0.1798
HNRNPR	0.603617	0.3644	0.54002	0.6897	0.562406	0.3163	0.61039	0.7316	0.694545	0.4824	0.216136	0.2191	-0.0164335	0.0003	-0.389576	0.1518
IGF2BP3	0.73251	0.5366	0.363237	0.1319	0.70457	0.4964	0.292989	0.1209	0.618774	0.3829	0.292189	0.1212	0.637647	0.4066	0.197499	0.039
LRPPRC	0.873781	0.7635	0.825338	0.6812	0.852979	0.7276	0.735498	0.541	0.869082	0.7553	0.831819	0.6919	-0.0107278	0.0049	0.19413	0.0276
MBOAT7	0.385249	0.1484	-0.00943394	9e-05	0.466165	0.2173	-0.089342	0.008	0.53875	0.2903	0.334361	0.1118	0.00638102	4e-05	-0.33157	0.1099	0.440837	0.1943	-0.0975522	0.0095
MOV10	0.381941	0.1459	0.483246	0.2335	0.360324	0.1298	0.488132	0.2858	0.257619	0.0664	0.453578	0.2057	0.354979	0.126	0.301164	0.0907
RBM4	0.6142	0.6531	0.625253	0.3571	0.345847	0.1196	0.447187	0.2	0.827684	0.6851	0.673927	0.4542	-0.477298	0.2278	-0.0295808	0.0009
RBMX	0.414595	0.1719	0.36751	0.1351	0.33413	0.1116	0.286086	0.0818	0.517223	0.2675	0.304233	0.0926	-0.393088	0.1545	0.00672182	5e-05
SRRM2	-0.0589632	0.0035	0.554202	0.205	0.250131	0.0626	0.450789	0.2032	-0.443511	0.1967	0.472373	0.2231	0.124067	-0.261102	0.0154	0.0682
TRIM56	0.452913	0.2051	-0.236663	0.056	0.123258	0.0152	0.243659	0.0594	0.493507	0.4141	-0.171135	0.0293	-0.536604	0.295	0.344318	0.1186
	Total		Nuclear		Cytoplasmic		Nuc / Cyto
	Early	Late	Early	Late	Early	Late	Early	Late
CSDE1	0.559143		0.439231	0.44714	0.595183
DNM2	0.452408	0.511176	0.450877	0.580399	0.489507	0.617641		-0.513904
FAM120A	0.449539	0.542166		0.560621	0.688775	0.574166		-0.424018
HNRNPR	0.603617	0.54002	0.562406	0.61039	0.694545			-0.389576
IGF2BP3	0.73251		0.70457		0.618774		0.637647
LRPPRC	0.873781	0.825338	0.852979	0.735498	0.869082	0.831819
MBOAT7			0.466165		0.53875
MOV10		0.483246		0.488132		0.453578
RBM4	0.6142	0.625253		0.447187	0.827684	0.673927	-0.477298
RBMX	0.414595				0.517223		-0.393088
SRRM2		0.554202		0.450789	-0.443511	0.472373
TRIM56	0.452913				0.493507		-0.536604
R>0.35	R^2>0.15

## Sheet: CSDE1 HIV RNA Correlation
Cell #	Inf Stage	total gRNA	total gag	mean nuc gRNA	mean nuc csde1	mean cyto gRNA	mean cyto csde1	mean total gRNA	mean total csde1	N/C mean csde1	CSDE1	Early Pearson's R	Late Pearson's R	Early R^2	Late R^2		total gag	total gRNA
26	Early	685602	105293	1629.41	1715.85	1062.37	1532.51	1276.73	3248.36	1.11963	Nuc Mean	0.439231	0.44714	0.1929	0.1999		105293	685602
25	Early	702809	125396	1703.8	1592.89	1561.78	1773.31	1619.38	3366.2	0.898259	Cyto Mean	0.595183	0.1438	0.3542	0.0207		125396	702809
28	Early	664951	153187	1515.72	1257.37	1197.48	1615.58	1319.35	2872.94	0.778279	N/C Mean	-0.137326	0.360752	0.0189	0.1301		153187	664951
23	Early	851416	166858	1541	1941.65	1184.42	2278.62	1311.89	4220.27	0.852118	Total	0.559143	0.374748	0.3126	0.1404		166858	851416
29	Early	802784	194268	1737.45	2557.62	1719.32	3601.33	1726.42	6158.94	0.710187							194268	802784
42	Early	586208	269166	2254.44	1700.14	1819.47	2505.52	2035.44	4205.66	0.678558							269166	586208
21	Early	666723	345931	1875.61	1743.6	1725.16	2608.16	1782.68	4351.77	0.668517							345931	666723
41	Early	817504	360843	1775.95	1911.38	1159.19	1673.61	1340.17	3584.99	1.14207							360843	817504
30	Early	1452500	406940	2699.05	2585.11	2635.03	2707.86	2655.39	5292.97	0.954669							406940	1452500
24	Early	1386845	429928	1793.93	2520.83	1972.42	2464.85	1902.39	4985.68	1.02271							429928	1386845
34	Early	1231589	491273	2652.18	2038.19	2332.92	2316.28	2463.18	4354.47	0.879941							491273	1231589
20	Early	974093	608330	1994.45	2320.96	1878.53	2276.44	1921.29	4597.4	1.01956							608330	974093
6	Early	708178	666232	2212.53	1605.12	1794.2	2151.91	1989.26	3757.03	0.745907							666232	708178
22	Early	963357	670124	2116.99	2200.29	1981.99	2384.26	2032.4	4584.54	0.922841							670124	963357
19	Early	1011981	827309	2037.02	1551.78	1971.03	2102.37	1996.02	3654.15	0.738106							827309	1011981
17	Early	1239413	993342	1967.93	1734.5	1434.29	1490.58	1643.78	3225.08	1.16364							993342	1239413
8	Early	631434	1071010	1075.22	1134.02	874.725	1439.03	961.087	2573.05	0.78805							1071010	631434
3	Early	1146378	1140068	2302.9	1489.45	2176.74	2102.08	2225.98	3591.52	0.70856							1140068	1146378
15	Early	1197246	1239199	1861.75	1428.27	1420.8	1303.47	1544.83	2731.73	1.09574							1239199	1197246
12	Early	1318315	1594219	2407.38	2512.05	1778.95	2390.85	1970.58	4902.89	1.05069							1594219	1318315
11	Early	1180411	2054960	1333.45	1239.31	1085.76	1578.58	1176.88	2817.89	0.785076							2054960	1180411
10	Early	998291	2243970	2545.65	1564.71	1981.52	1942.49	2228.33	3507.2	0.805518							2243970	998291
4	Late	2268872	4581157	5422.29	1835.18	6040.11	2425.93	5787.94	4261.11	0.756485							4581157	2268872
38	Late	4245530	5139846	9082.7	1923.74	12350.4	2616.05	10914	4539.79	0.735361							5139846	4245530
5	Late	2235989	5813665	5872.4	2335.13	5621.26	2254.75	5733.31	4589.88	1.03565							5813665	2235989
32	Late	15547114	6828081	17175.6	2290.34	26778	2765.91	22829.8	5056.25	0.828061							6828081	15547114
27	Late	13661283	7826477	12132	2162.32	23006.7	2344.5	18974	4506.82	0.922295							7826477	13661283
31	Late	18344294	8217039	23879.8	2416.81	40858.9	2553.3	34611.9	4970.1	0.946543							8217039	18344294
14	Late	4927044	10031023	7406.05	1551.64	9498.42	1642.78	8751.41	3194.42	0.944523							10031023	4927044
35	Late	11887619	12935043	11973.6	1747.89	21644.9	2078.28	18121.4	3826.17	0.841029							12935043	11887619
39	Late	10758553	15996615	13482.1	2279.57	20894.9	2465.89	17782.7	4745.46	0.924443							15996615	10758553
40	Late	11048063	16557121	9821.71	1266.47	17485.1	2100.41	14770.1	3366.88	0.602964							16557121	11048063
33	Late	12012877	19129761	12438.5	2745.62	23422.3	1978.26	18567	4723.88	1.38789							19129761	12012877
36	Late	12698328	23570385	12407.3	2057.03	22405.7	2199.64	18537.7	4256.67	0.935167							23570385	12698328
7	Late	7368349	29314955	14792.7	2029.52	19288.5	1924.62	17543.7	3954.14	1.05451							29314955	7368349
1	Late	8875883	29362655	13754.4	2063.53	20163.9	2124.69	18040.4	4188.22	0.971212							29362655	8875883
37	Late	24888670	36590751	22942	2513.25	38278.2	1947.29	32322.9	4460.54	1.29064							36590751	24888670
2	Late	11090201	36785797	16002.8	2504.44	21690.5	1802.62	19663.5	4307.07	1.38933							36785797	11090201
13	Late	16645493	70537216	8456.61	1884.42	12218.8	2033.4	11074.8	3917.82	0.926737							70537216	16645493
9	Late	18866992	71912304	17306.8	1163.11	22573.4	1479.03	21222.7	2642.14	0.786401							71912304	18866992
16	Late	37501989	96018405	24836.6	2720.27	40166.1	2409.06	35379.2	5129.33	1.12918							96018405	37501989
18	Late	37915371	132283003	13750.5	2514.52	20166.1	2440.79	19005.2	4955.31	1.0302							132283003	37915371

## Sheet: CSDE1_Outliers
Early total gRNA	Late Total gRNA				Early	Late
2655.39	35379.2			Min	961.087	5733.31
2463.18	34611.9			Q1-Min	430.249	8113.01
2228.33	32322.9			Med-Q1	451.201	4483.22
2225.98	22829.8			Q3-Med	180.766	1723.75
2035.44	21222.7			Max-Q3	632.09	15325.9
2032.4	19663.5
1996.02	19005.2				Early	Late
1989.26	18974		Lower	Min	961.087	5733.31
1970.58	18567			Q1	1391.34	13846.3
1921.29	18537.7			Median	1842.54	18329.5
1902.39	18121.4			Q3	2023.3	20053.3
1782.68	18040.4		Upper	Max	2655.39	35379.2
1726.42	17782.7			Mean	1778.34	18481.7
1643.78	17543.7
1619.38	14770.1				Early	Late
1544.83	11074.8			Min	961.087	5733.31
1340.17	10914			Q1-Min	430.249	8113.01
1319.35	8751.41			Med-Q1	451.201	4483.22
1311.89	5787.94			Q3-Med	180.766	1723.75
1276.73	5733.31			Max-Q3	632.09	15325.9
1176.88
961.087
				Outliers
						0
						0
					0	0
					0	0
					0	0
					0	0
					0	0
					0	0
					0	0
					0	0
					0	0
					0	0
					0	0
					0	0
					0	0
					0	0
					0	0
					0	0
					0	0
					0	0

## Sheet: CSDE1_Exp and Dist Changes
Nuc Early	Nuc Late	Cyto Early	Cyto-Late	Total Early	Total Late	N/C Early	N/C Late			p-values			Early	Late	Early	Late	Early	Late	Early	Late
2585.11	2745.62	3601.33	2765.91	6158.94	5129.33	1.16364	1.38933			0.0594521		Min	1134.02	1163.11	1303.47	1479.03	2573.05	2642.14	0.668517	0.602964
2557.62	2720.27	2707.86	2616.05	5292.97	5056.25	1.14207	1.38789					Q1-Min	420.985	709.004	326.614	491.489	704.766	1302.92	0.085483	0.234823
2520.83	2514.52	2608.16	2553.3	4985.68	4970.1	1.11963	1.29064			0.220333		Med-Q1	170.164	240.811	497.057	191.649	427.77	438.742	0.11203	0.102057
2512.05	2513.25	2505.52	2465.89	4902.89	4955.31	1.09574	1.12918					Q3-Med	434.59	325.79	262.058	267.48	821.438	345.469	0.155892	0.100516
2320.96	2504.44	2464.85	2440.79	4597.4	4745.46	1.05069	1.05451			0.0537055		Max-Q3	425.345	306.901	1212.13	336.263	1631.91	400.058	0.141719	0.348972
2200.29	2416.81	2390.85	2425.93	4584.54	4723.88	1.02271	1.03565
2038.19	2335.13	2384.26	2409.06	4354.47	4589.88	1.01956	1.0302			0.0955351			Early	Late	Early	Late	Early	Late	Early	Late	% Change Nuclear	% Change Cytoplasm	% Change Total	% Change N/C
1941.65	2290.34	2316.28	2344.5	4351.77	4539.79	0.954669	0.971212				Lower	Min	1134.02	1163.11	1303.47	1479.03	2573.05	2642.14	0.668517	0.602964
1911.38	2279.57	2278.62	2254.75	4220.27	4506.82	0.922841	0.946543					Q1	1555.01	1872.11	1630.08	1970.52	3277.82	3945.06	0.754	0.837787
1743.6	2162.32	2276.44	2199.64	4205.66	4460.54	0.898259	0.944523					Median	1725.17	2112.92	2127.14	2162.17	3705.59	4383.8	0.86603	0.939845	22.4761	1.64666	18.3025	8.52333
1734.5	2063.53	2151.91	2124.69	3757.03	4307.07	0.879941	0.935167					Q3	2159.76	2438.71	2389.2	2429.65	4527.03	4729.27	1.02192	1.04036
1715.85	2057.03	2102.37	2100.41	3654.15	4261.11	0.852118	0.926737				Upper	Max	2585.11	2745.62	2707.86	2765.91	5292.97	5129.33	1.14207	1.38933
1700.14	2029.52	2102.08	2078.28	3591.52	4256.67	0.805518	0.924443					Mean	1833.87	2100.24	2101.8	2179.36	3935.67	4279.6	0.887665	0.971931	14.5252	3.69005	8.73881	9.49298
1605.12	1923.74	1942.49	2033.4	3584.99	4188.22	0.78805	0.922295
1592.89	1884.42	1773.31	1978.26	3507.2	3954.14	0.785076	0.841029						Early	Late	Early	Late	Early	Late	Early	Late
1564.71	1835.18	1673.61	1947.29	3366.2	3917.82	0.778279	0.828061					Min	1134.02	1163.11	1303.47	1479.03	2573.05	2642.14	0.668517	0.602964
1551.78	1747.89	1615.58	1924.62	3248.36	3826.17	0.745907	0.786401					Q1-Min	420.985	709.004	326.614	491.489	704.766	1302.92	0.085483	0.234823
1489.45	1551.64	1578.58	1802.62	3225.08	3366.88	0.738106	0.756485					Med-Q1	170.164	240.811	497.057	191.649	427.77	438.742	0.11203	0.102057
1428.27	1266.47	1532.51	1642.78	2872.94	3194.42	0.710187	0.735361					Q3-Med	434.59	325.79	262.058	267.48	821.438	345.469	0.155892	0.100516
1257.37	1163.11	1490.58	1479.03	2817.89	2642.14	0.70856	0.602964					Max-Q3	425.345	306.901	318.66	336.263	765.941	400.058	0.120151	0.348972
1239.31		1439.03		2731.73		0.678558
1134.02		1303.47		2573.05		0.668517
												Outliers			3601.33		6158.94		1.16364
														0		0		0		0
														0		0		0		0
													0	0	0	0
													0	0	0	0
													0	0	0	0
													0	0	0	0
													0	0	0	0
													0	0	0	0
													0	0	0	0
													0	0	0	0
													0	0	0	0
													0	0	0	0
													0	0	0	0
													0	0	0	0
													0	0	0	0
													0	0	0	0
													0	0	0	0
													0	0	0	0
													0	0	0	0
													0	0	0	0

## Sheet: DNM2_HIV RNA Correlation
Cell #	Inf Stage	total gRNA	total gag	mean nuc gRNA	mean nuc dnm2	mean cyto gRNA	mean cyto dnm2	mean total gRNA	mean total dnm2	N/C mean dnm2		Early Pearson's R	Late Pearson's R	Early Pearson's R without outliers	Late Pearson's R without outliers	Early R^2 without outliers	Late R^2 without outliers			total gag	total gRNA
20	Early	551691	162794	1728.24	1464.61	1286.57	1341.17	1459.5	2805.79	1.09204	Nuc Mean	0.450877	0.283234	0.450877	0.580399	0.2033	0.3369			162794	551691
8	Early	716083	212440	1508.6	1129.62	861.335	879.597	1110.21	2009.21	1.28424	Cyto Mean	0.489507	0.386626	0.489507	0.617641	0.2396	0.3815			212440	716083
45	Early	1309407	227257	2545.88	1208.28	1324.54	802.652	1781.51	2010.93	1.50535	N/C Mean	-0.235009	-0.378183	-0.235009	-0.513904	0.0552	0.2641			227257	1309407
23	Early	694408	388842	1206.9	1352.83	979.793	1119.95	1071.62	2472.78	1.20793	Total			0.452408	0.511176	0.2047	0.2613			388842	694408
50	Early	1144022	440450	2625.34	1581.88	1849.06	1513.24	2134.37	3095.13	1.04536										440450	1144022
16	Early	835563	495031	1241.39	1088.49	1038.47	1048.16	1108.17	2136.65	1.03848										495031	835563
12	Early	697136	501657	1774.29	1400.49	1506.81	1277.94	1580.81	2678.43	1.0959										501657	697136
11	Early	580494	544550	1787.58	1558.59	1490.45	1314.22	1653.83	2872.81	1.18595										544550	580494
21	Early	879060	661682	2570.11	862.413	2074.31	1086.84	2307.24	1949.25	0.793504										661682	879060
35	Early	1138585	690734	2987.41	1754.93	2239.48	1579.55	2443.32	3334.48	1.11103										690734	1138585
4	Early	487434	703987	498.252	1208.51	783.592	1253.76	680.774	2462.27	0.963907										703987	487434
46	Early	2623734	800618	3251.7	1263.77	2589.37	1253.56	2806.13	2517.33	1.00815										800618	2623734
32	Early	1228224	834949	2611.1	1558.43	2491.85	1554.67	2532.42	3113.1	1.00242										834949	1228224
7	Early	793460	839500	982.385	724.859	1181.78	815.892	1123.88	1540.75	0.888424										839500	793460
15	Early	1688621	944739	3823.98	1495.85	2443.15	1744.32	3064.65	3240.16	0.857555										944739	1688621
1	Early	1241470	1031271	1620.17	1198.52	1696.2	1260.26	1666.4	2458.78	0.951006										1031271	1241470
3	Early	900610	1087568	501.141	616.98	1304.75	760.961	1068.34	1377.94	0.81079										1087568	900610
51	Early	1494516	1419283	2628.1	1542.15	2633.03	1412.6	2631.19	2954.75	1.09171										1419283	1494516
17	Early	2520578	1673006	4135.81	1358.01	4470.45	1247.59	4345.82	2605.59	1.08851										1673006	2520578
18	Early	1831594	1736434	3981.39	1165.01	4375.42	1486.88	4210.56	2651.89	0.783523										1736434	1831594
42	Late	3950658	4545443	2154.49	983.765	3102.71	798.597	2926.41	1782.36	1.23187										2964137	3056975
31	Late	3509821	3298848	5876.4	1431.56	3228.31	1197.96	3895.47	2629.52	1.195										3298848	3509821
41	Late	4377892	4973779	3205.67	996.417	4731.02	805.221	4399.89	1801.64	1.23745										3313672	8793266
40	Late	6502481	4490580	3256.59	826.685	5460.98	838.172	5048.51	1664.86	0.986295										3598332	5588728
38	Late	7235034	4084604	3882.42	1099.49	5742.88	885.07	5284.9	1984.56	1.24226										4084604	7235034
49	Late	5588728	3598332	7905.53	1439.78	4769.89	1323.35	5685.38	2763.13	1.08798										4490580	6502481
39	Late	7147683	4984560	5078.83	1345.68	6750.55	1056.6	6237.07	2402.27	1.27359										4500012	3955040
22	Late	4534273	5539002	4443.38	986.95	7734.53	1187.93	6677.87	2174.88	0.830813										4545443	3950658
36	Late	3056975	2964137	5479.54	1169.27	7241.87	1299.74	6869.61	2469.01	0.899613										4937065	3480024
19	Late	5457376	6944022	5792.49	1481.18	8545.91	1270.13	7751.95	2751.31	1.16616										4973779	4377892
10	Late	5914750	8912313	6216.11	1551.87	10352.7	1394.75	8622.08	2946.62	1.11265										4984560	7147683
37	Late	8793266	3313672	7394	1448.31	9403.4	1083.49	8775.71	2531.8	1.3367										5539002	4534273
43	Late	3480024	4937065	6929.49	1195.72	10922.3	1345.19	9747.97	2540.91	0.888891										6944022	5457376
44	Late	3955040	4500012	8782.55	1200.61	10812.6	1306.03	10141.1	2506.64	0.919286										7579201	6511040
9	Late	7180858	13130320	6169.7	676.881	11951	897.714	10467.7	1574.59	0.754005										8501627	6463313
14	Late	6924693	11384949	10097.6	1700.71	12015.3	1968.01	11352	3668.71	0.864178										8912313	5914750
47	Late	8750314	11637702	8175.07	1255.3	13280.5	1466.16	11824.7	2721.47	0.856183										11384949	6924693
29	Late	6463313	8501627	9553	2077.12	15451.9	1988.15	12723.1	4065.27	1.04475										11637702	8750314
2	Late	16572423	31510507	10371.8	1692.82	15472.7	1614.85	14188.7	3307.67	1.04828										13130320	7180858
13	Late	10382104	16344604	9410.32	1066.15	16821	1218.95	14747.3	2285.1	0.874641										16344604	10382104
5	Late	12722269	24600771	8541.89	919.361	17224.8	1196.78	14985	2116.14	0.768198										18208729	10304738
30	Late	6511040	7579201	14042.9	2842.27	15469	2429.4	15002.4	5271.68	1.16995										18777902	13954861
24	Late	13954861	18777902	10705	1623.72	16987.6	1527.43	15201.4	3151.15	1.06304										23165455	14611639
25	Late	10304738	18208729	12259.5	1397.2	18134.2	1520.29	15951.6	2917.49	0.919039										24600771	12722269
6	Late	15214757	27250361	11295.9	922.772	17965.8	1204.71	16083.3	2127.48	0.765972										26457439	11409751
33	Late	11409751	26457439	14520.6	1432.91	23640.8	1733.14	20595.2	3166.05	0.826774										27250361	15214757
48	Late	29791702	55095286	16064.5	1764.27	25782.1	1871.22	23366	3635.49	0.942844										27607561	15371078
53	Late	15371078	27607561	17391.1	1388.37	31739.9	1879.19	26230.5	3267.56	0.738814										30480373	20470380
27	Late	20470380	30480373	19160.5	1092.11	31752.5	1078.91	27403.5	2171.02	1.01223										31510507	16572423
52	Late	14611639	23165455	17462.5	1508.34	33195.6	2216.4	28317.1	3724.74	0.680534										38337548	25541750
26	Late	27411557	42139100	22076.2	1244.26	37769.5	1082.14	33510.5	2326.4	1.14981										42139100	27411557
28	Late	25541750	38337548	23644.8	1014.01	44147.8	1376.85	39234.6	2390.85	0.73647										55095286	29791702
34	Late	29404183	56376939	29218.4	1708.27	44108.7	1564.44	39257.9	3272.71	1.09194										56376939	29404183

## Sheet: DNM2_Outliers
Early Total gRNA	Late Total gRNA			Early	Late
1754.93	39257.9		Min	616.98	2926.41
1581.88	39234.6		Q1-Min	539.179	3943.19
1558.59	33510.5		Med-Q1	152.143	4955.14
1558.43	28317.1		Q3-Med	199.121	4258.5
1542.15	27403.5		Max-Q3	247.506	23174.7
1495.85	26230.5
1464.61	23366			Early	Late
1400.49	20595.2	Lower	Min	616.98	2926.41
1358.01	16083.3		Q1	1156.16	6869.61
1352.83	15951.6		Median	1308.3	11824.7
1263.77	15201.4		Q3	1507.42	16083.3
1208.51	15002.4	Upper	Max	1754.93	23366
1208.28	14985		Mean	1276.71	14621.4
1198.52	14747.3
1165.01	14188.7			Early	Late		1137.95
1129.62	12723.1		Min	616.98	2926.41
1088.49	11824.7		Q1-Min	539.179	3943.19
862.413	11352		Med-Q1	152.143	4955.14
724.859	10467.7		Q3-Med	199.121	4258.5
616.98	10141.1		Max-Q3	247.506	7282.79
	9747.97
	8775.71			Early	Late
	8622.08		Outliers		39257.9
	7751.95				39234.6
	6869.61				33510.5
	6677.87				28317.1
	6237.07				27403.5
	5685.38				26230.5
	5284.9
	5048.51
	4399.89
	3895.47
	2926.41
				0
				0
				0
				0
				0
				0
				0
				0
				0
				0
				0
				0
				0
				0	0
				0	0
				0	0
				0	0
				0	0
				0	0
				0	0

## Sheet: DNM2_Exp and Dist Changes
Nuc Early	Nuc Late	Cyto Early	Cyto-Late	Total Early	Total Late	N/C Early	N/C Late	p-values			Early	Late	Early	Late	Early	Late	Early	Late
1459.5	2842.27	1744.32	2429.4	3334.48	5271.68	1.50535	1.3367	0.00481271		Min	680.774	676.881	760.961	798.597	1377.94	1574.59	0.783523	0.680534
1110.21	2077.12	1579.55	2216.4	3240.16	4065.27	1.28424	1.27359			Q1-Min	439.689	389.267	316.209	284.897	727.28	600.288	0.151838	0.175649
1781.51	1764.27	1554.67	1988.15	3113.1	3724.74	1.20793	1.24226	0.334035		Med-Q1	603.492	279.529	179.841	222.533	456.242	366.028	0.106561	0.130112
1071.62	1708.27	1513.24	1968.01	3095.13	3668.71	1.18595	1.23745			Q3-Med	833.159	162.661	174.162	258.411	331.83	625.141	0.0577582	0.163512
2134.37	1700.71	1486.88	1879.19	2954.75	3635.49	1.11103	1.23187	0.574311		Max-Q3	1788.71	1333.94	313.144	864.966	441.191	2105.63	0.405675	0.186894
1108.17	1692.82	1412.6	1871.22	2872.81	3307.67	1.0959	1.195
1580.81	1623.72	1341.17	1733.14	2805.79	3272.71	1.09204	1.16995	0.595249			Early	Late	Early	Late	Early	Late	Early	Late	% Change Nuclear	% Change Cytoplasm	% Change in Distribution	% Change in Distribution
1653.83	1551.87	1314.22	1614.85	2678.43	3267.56	1.09171	1.16616		Lower	Min	680.774	676.881	760.961	798.597	1377.94	1574.59	0.783523	0.680534
2307.24	1508.34	1277.94	1564.44	2651.89	3166.05	1.08851	1.14981			Q1	1120.46	1066.15	1077.17	1083.49	2105.22	2174.88	0.93536	0.856183
2443.32	1481.18	1260.26	1527.43	2605.59	3151.15	1.04536	1.11265			Median	1723.95	1345.68	1257.01	1306.03	2561.46	2540.91	1.04192	0.986295	-21.9425	3.89937	-0.802368	-5.33889
680.774	1448.31	1253.76	1520.29	2517.33	2946.62	1.03848	1.09194			Q3	2557.11	1508.34	1431.17	1564.44	2893.29	3166.05	1.09968	1.14981
2806.13	1439.78	1253.56	1466.16	2472.78	2917.49	1.00815	1.08798		Upper	Max	3064.65	2077.12	1744.32	1988.15	3334.48	3724.74	1.28424	1.3367
2532.42	1432.91	1247.59	1394.75	2462.27	2763.13	1.00242	1.06304			Mean	2039.04	1348	1237.69	1382.64	2514.4	2730.64	1.04029	0.9914	-33.8902	11.7109	8.59996	-4.69955
1123.88	1431.56	1119.95	1376.85	2458.78	2751.31	0.963907	1.04828
3064.65	1397.2	1086.84	1345.19	2136.65	2721.47	0.951006	1.04475				Early	Late	Early	Late	Early	Late	Early	Late
1666.4	1388.37	1048.16	1323.35	2010.93	2629.52	0.888424	1.01223			Min	680.774	676.881	760.961	798.597	1377.94	1574.59	0.783523	0.680534
1068.34	1345.68	879.597	1306.03	2009.21	2540.91	0.857555	0.986295			Q1-Min	439.689	389.267	316.209	284.897	727.28	600.288	0.151838	0.175649
2631.19	1255.3	815.892	1299.74	1949.25	2531.8	0.81079	0.942844			Med-Q1	603.492	279.529	179.841	222.533	456.242	366.028	0.106561	0.130112
4345.82	1244.26	802.652	1270.13	1540.75	2506.64	0.793504	0.919286			Q3-Med	833.159	162.661	174.162	258.411	331.83	625.141	0.0577582	0.163512
4210.56	1200.61	760.961	1218.95	1377.94	2469.01	0.783523	0.919039			Max-Q3	507.535	568.786	313.144	423.709	441.191	558.687	0.184564	0.186894
	1195.72		1204.71		2402.27		0.899613
	1169.27		1197.96		2390.85		0.888891				Early	Late	Early	Late	Early	Late	Early	Late
	1099.49		1196.78		2326.4		0.874641			Outliers		2842.27		2429.4		5271.68	1.50535
	1092.11		1187.93		2285.1		0.864178							2216.4		4065.27
	1066.15		1083.49		2174.88		0.856183
	1014.01		1082.14		2171.02		0.830813
	996.417		1078.91		2127.48		0.826774
	986.95		1056.6		2116.14		0.768198
	983.765		897.714		1984.56		0.765972
	922.772		885.07		1801.64		0.754005
	919.361		838.172		1782.36		0.738814
	826.685		805.221		1664.86		0.73647
	676.881		798.597		1574.59		0.680534
											4345.82
											4210.56
											0		0		0		0
											0		0		0		0
											0		0		0		0
											0		0		0		0
											0		0		0		0
											0		0		0		0
											0		0		0		0
											0		0		0		0
											0		0		0		0
											0		0		0		0
											0		0		0		0
											0		0		0		0
											0		0		0		0
											0	0	0	0	0	0	0	0
											0	0	0	0	0	0	0	0
											0	0	0	0	0	0	0	0
											0	0	0	0	0	0	0	0
											0	0	0	0	0	0	0	0
											0	0	0	0
											0	0	0	0

## Sheet: FAM120A HIV RNA Correlation
Cell #	Inf Stage	total gag	nuc gRNA	nuc fam120a	cyto gRNA	cyto fam120a	total gRNA	total fam120a	N/C		Early Pearson's R	Late Pearson's R	Early Pearson's R without outliers	Late Pearson's R without outliers	Early R^2 without outliers	Late R^2 without outliers		total gag	total gRNA
23	Early	1242878	1128604	649977	1720153	1707114	2848757	2357091	0.380746	Nuc	0.573014	0.466504	0.311786	0.560621	0.0972	0.3143		1106065	3414491
8	Early	4779789	419014	1349597	2572008	4427664	2991022	5777261	0.30481	Cyto	0.561004	0.710604	0.688775	0.574166	0.4744	0.3297		1138583	3804499
22	Early	1904253	1391646	813212	1980011	2435685	3371657	3248897	0.333874	N/C	-0.251023	-0.526307	-0.323464	-0.424018	0.1046	0.1798		1142962	3944563
12	Early	2974684	1005332	1276482	2386863	4536788	3392195	5813270	0.281362	Total			0.449539	0.542166	0.2021	0.2939		1173962	3568097
46	Early	1106065	1458754	770553	1955737	1791539	3414491	2562092	0.430107									1237883	3459800
25	Early	1756529	1397774	927919	2027171	1915733	3424945	2843652	0.484368									1242878	2848757
50	Early	1237883	1324067	948244	2135733	2258844	3459800	3207088	0.419792									1263803	3911592
49	Early	1430395	1121157	970648	2345739	2964948	3466896	3935596	0.327374									1265516	3502116
16	Early	1265516	1231220	956622	2270896	3412035	3502116	4368657	0.280367									1384116	3669274
48	Early	1173962	1772004	1701689	1796093	3520563	3568097	5222252	0.483357									1430395	3466896
14	Early	1444537	1638815	1106822	1987370	2806331	3626185	3913153	0.394402									1444537	3626185
26	Early	1925511	1415799	957377	2214027	2714133	3629826	3671510	0.352738									1756529	3424945
38	Early	1384116	1353687	832520	2315587	2256231	3669274	3088751	0.368987									1794135	4440657
9	Early	1138583	1487507	1008167	2316992	3683540	3804499	4691707	0.273695									1835917	4778395
47	Early	1263803	1619157	895076	2292435	2403427	3911592	3298503	0.372417									1904253	3371657
32	Early	1142962	1844475	1469818	2100088	3263825	3944563	4733643	0.450336									1925511	3629826
43	Early	3788362	1359443	1029965	2734711	5647886	4094154	6677851	0.182363									2536431	4428790
24	Early	2536431	1742183	1094159	2686607	3298141	4428790	4392300	0.33175									2703290	5248948
45	Early	1794135	2095650	1358905	2345007	2609421	4440657	3968326	0.520769									2974684	3392195
42	Early	3620864	2059307	1142508	2688036	3777450	4747343	4919958	0.302455									3517648	6777847
41	Early	1835917	2208112	1488244	2570283	4114483	4778395	5602727	0.361709									3518891	4955664
39	Early	3518891	1549961	827044	3405703	5316057	4955664	6143101	0.155575									3620864	4747343
14	Early	2703290	1799569	956463	3449379	3837545	5248948	4794008	0.249238									3788362	4094154
1	Early	4917029	2307565	1610753	3675839	3699696	5983404	5310449	0.435374									4064464	9270589
35	Early	3517648	2428969	2164217	4348878	7139514	6777847	9303731	0.303132									4779789	2991022
17	Early	7215559	2197351	1008055	5414450	4669637	7611801	5677692	0.215874									4917029	5983404
7	Early	8574764	2898373	910587	5985253	3232159	8883626	4142746	0.281727									7215559	7611801
37	Early	4064464	4615696	2050899	4654893	5630274	9270589	7681173	0.364263									8574764	8883626
33	Late	37061458	8085222	1043108	14070271	1866495	22155493	2909603	0.558859									37061458	22155493
36	Late	49373835	5038588	673362	22473642	2346261	27512230	3019623	0.286994									49373835	27512230
34	Late	51374807	9555070	1304567	21569043	2662534	31124113	3967101	0.489972									51374807	31124113
27	Late	56029388	8485349	845626	26168840	2794903	34654189	3640529	0.30256									56029388	34654189
20	Late	78183731	7197327	840037	32266796	3513382	39464123	4353419	0.239096									66441115	39885252
28	Late	66441115	9865255	1104499	30019997	3272838	39885252	4377337	0.337474									76249408	41644670
31	Late	76249408	12441937	1717307	29202733	3366861	41644670	5084168	0.510062									78183731	39464123
19	Late	112445921	7979869	1043358	38549388	5428294	46529257	6471652	0.192207									80708831	49482191
6	Late	80708831	12055249	2124463	37426942	5208406	49482191	7332869	0.407891									89314208	52919652
4	Late	103579839	12623470	1036068	40291848	3472246	52915318	4508314	0.298386									97987610	68798966
30	Late	89314208	10947806	1010279	41971846	3162479	52919652	4172758	0.319458									103413866	62084615
3	Late	104279742	18191282	2334904	42732768	7275939	60924050	9610843	0.320908									103579839	52915318
18	Late	103413866	11409415	1272379	50675200	5607617	62084615	6879996	0.226902									104279742	60924050
5	Late	104668886	20697847	1357308	46110053	3275757	66807900	4633065	0.414349									104668886	66807900
13	Late	97987610	19549019	1583152	49249947	4204180	68798966	5787332	0.376566									105285329	81638068
15	Late	112735656	11799643	966862	57069042	4263062	68868685	5229924	0.2268									106773523	104219215
21	Late	129997790	18419876	1833631	58659149	5387379	77079025	7221010	0.340357									112445921	46529257
11	Late	105285329	17100560	635532	64537508	2708360	81638068	3343892	0.234656									112735656	68868685
40	Late	156122672	17808628	1693824	71912606	6469627	89721234	8163451	0.261812									129997790	77079025
10	Late	106773523	23436022	925364	80783193	3375941	104219215	4301305	0.274106									156122672	89721234
44	Late	242281922	19238214	2303261	105100627	13959809	124338841	16263070	0.164992									242281922	124338841

[truncated: 29 more sheets: FAM120A_Outliers, FAM120A_Exp and Dist Changes, HNRNPR HIV RNA Correlation, HNRNPR_Outliers, HNRNPR_Exp and Dist Changes, IGF2BP3 HIV RNA Correlation, IGF2BP3_Outliers, IGF2BP3 Exp and Dist Change, LRPPRC HIV RNA Correlation, LRPPRC_Outliers, LRPPRC Exp and Dist Changes, MBOAT7 HIV RNA Correlation, MBOAT7_Outliers, MBOAT7 Exp and Dist Changes, MOV10 HIV RNA Correlation, MOV10_Outliers, MOV10 Exp and Dist Changes, RBM4 HIV RNA Correlation, RBM4_Outliers, RBM4 Exp and Dist Changes …]
