# Supplementary material for: Identification of host proteins differentially associated with HIV-1 RNA splice variants
Source: eLife. 2021 Feb 25;10:e62470. doi: 10.7554/eLife.62470 (PMC7906601; doi:10.7554/eLife.62470)
Supplement: Supplementary file 2. — Includes comparison of common protein interactors to a meta-analysis of studies identifying general mRNA interactors. Also includes comparison of proteins previously determined to interact with human immunodeficiency virus type 1 (HIV-1) RNAs. [file elife-62470-supp2.xlsx]

## Sheet: Common Protein Interactors
									Log2 transformation of protein intensity									# of Bioreps containing each protein			Proteins Identified by HyPR-MS			Protein Identified in PolyA RNA Binding Protein Studies									Proteins Identified by HyPR-MS		Protein previously identified in HIV RNA segment interaction studies
LFQ intensity FL Bio1	LFQ intensity FL Bio2	LFQ intensity FL Bio3	LFQ intensity PS Bio1	LFQ intensity PS Bio2	LFQ intensity PS Bio3	LFQ intensity CS Bio1	LFQ intensity CS Bio2	LFQ intensity CS Bio3	Log2 FL Bio1	Log2 FL Bio2	Log2 FL Bio3	Log2 PS Bio1	Log2 PS Bio2	Log2 PS Bio3	Log2 CS Bio1	Log2 CS Bio2	Log2 CS Bio3	FL Count	PS Count	CS Count	Protein IDs	Gene names	Differential Interactors (per HyPR-MS_SV)	Hs_Baltz2012	Hs_Beckmann 2015	Hs_Kramer 2014	Hs_Castello 2012	Hs_Castello 2016	Hs_Conrad 2016_chr	Hs_Conrad 2016	Hs_Queiroz (OOPS)	# of studies "yes"	Protein IDs	Gene names	Stake, 2015 (5'UTR)	Kula, 2011 (5'LTR, TAR, SD1, psi, SA7, 3'LTR)	Marchand, 2011 (nt 7965-8046; SLS2-A7)-nuclear factors
8971000	5912700	10117000	6845400	6115600	7528400	11962000	11322000	10491000	23.0968	22.4954	23.2703	22.7067	22.5441	22.8439	23.512	23.4326	23.3226	3	3	3	P49588	AARS			YES						YES	2	P49588	AARS
23601000	23202000	20839000	4969500	14805000	8900600	3978900	4141900	4082800	24.4923	24.4677	24.3128	22.2447	23.8196	23.0855	21.9239	21.9819	21.9611	3	3	3	Q5JTZ9	AARS2	X								YES	1	Q5JTZ9	AARS2
12767000	16828000	20309000	17703000	13011000	16903000	17477000	16488000	21907000	23.6059	24.0044	24.2756	24.0775	23.6332	24.0108	24.059	23.9749	24.3849	3	3	3	P61221	ABCE1						YES			YES	2	P61221	ABCE1
3308600	3599900	4223500	4764000		3683100	4318700	4792600	5803200	21.6578	21.7795	22.01	22.1837		21.8125	22.0422	22.1924	22.4684	3	2	3	H7C131	ACAA1											H7C131	ACAA1
36394000	27346000	29081000	7795500	6983000	12300000	8995900	7620500	7881700	25.1172	24.7048	24.7936	22.8942	22.7354	23.5522	23.1008	22.8615	22.9101	3	3	3	Q13085	ACACA	X								YES	1	Q13085	ACACA
64967000	75988000	49849000	30533000	27441000	26870000	19321000	19600000	23328000	25.9532	26.1793	25.5711	24.8639	24.7098	24.6795	24.2037	24.2244	24.4756	3	3	3	B7Z9I1	ACADM	X										B7Z9I1	ACADM
9597900	7409800	3882200	3685100	4632100	4309100	4341100	4328100	3704900	23.1943	22.821	21.8884	21.8133	22.1432	22.039	22.0496	22.0453	21.821	3	3	3	P49748	ACADVL									YES	1	P49748	ACADVL
17771000	17067000	16833000	12098000	11028000	8630000	11305000	13613000	11919000	24.083	24.0247	24.0048	23.5283	23.3947	23.0409	23.4305	23.6985	23.5068	3	3	3	P24752	ACAT1						YES			YES	2	P24752	ACAT1
10141000	8476300	8824700	15528000	20287000	16882000	9657400	9956700	12286000	23.2737	23.015	23.0731	23.8884	24.2741	24.009	23.2032	23.2472	23.5505	3	3	3	S4R3H4	ACIN1		YES	YES		YES					3	S4R3H4	ACIN1
19964000	26259000	25966000	24048000	22314000	26362000	37645000	31841000	34466000	24.2509	24.6463	24.6301	24.5194	24.4114	24.652	25.166	24.9244	25.0387	3	3	3	P53396	ACLY									YES	1	P53396	ACLY	YES
65896000	57548000	42368000	38585000	29879000	36043000	36700000	35077000	40781000	25.9737	25.7783	25.3365	25.2015	24.8326	25.1032	25.1293	25.064	25.2814	3	3	3	A2A274	ACO2						YES				1	A2A274	ACO2
6728100	10900000	6093600	9521400	9570700	8911800	6804400	8222800	7480300	22.6818	23.3778	22.5389	23.1827	23.1902	23.0873	22.698	22.9712	22.8347	3	3	3	O00154	ACOT7									YES	1	O00154	ACOT7
997800	1158200	1132900	1248200		963480	1213700	1370300	1090500	19.9284	20.1435	20.1116	20.2514		19.8779	20.211	20.3861	20.0566	3	2	3	Q15067	ACOX1											Q15067	ACOX1
	2789300	3118000	2014000	1914000	1452900	1158700	2435900	2035400		21.4115	21.5722	20.9416	20.8682	20.4705	20.1441	21.216	20.9569	2	3	3	P24666	ACP1									YES	1	P24666	ACP1
16990000	14033000	6072800	4937100	8778000	7155400	4555400	3305100	3546800	24.0182	23.7423	22.5339	22.2352	23.0655	22.7706	22.1191	21.6563	21.7581	3	3	3	Q4G176	ACSF3	X										Q4G176	ACSF3
3133900	3208500	5162600	3950000	3381600	3630000	5311100	3168200	5938500	21.5795	21.6135	22.2997	21.9134	21.6893	21.7915	22.3406	21.5952	22.5017	3	3	3	O95573	ACSL3									YES	1	O95573	ACSL3
11477000	6656600	6814700	4825300	4391800	5419900	3880200	4825700	4408700	23.4522	22.6664	22.7002	22.2022	22.0664	22.3698	21.8877	22.2023	22.0719	3	3	3	Q9NUB1	ACSS1											Q9NUB1	ACSS1
1131900000	1328600000	2123600000	1502200000	1219400000	1377700000	1766200000	1547300000	1681100000	30.0761	30.3073	30.9839	30.4844	30.1835	30.3596	30.718	30.5271	30.6468	3	3	3	P60709	ACTB											P60709	ACTB
	13647000	51726000	18929000		7796700	43144000	20932000	25359000		23.7021	25.6244	24.1741		22.8944	25.3627	24.3192	24.596	2	2	3	P63267	ACTG2	X										P63267	ACTG2
18501000	20926000	16386000	20014000	15035000	19800000	26133000	26581000	25085000	24.1411	24.3188	23.966	24.2545	23.8418	24.239	24.6394	24.6639	24.5803	3	3	3	O43707	ACTN4					YES				YES	2	O43707	ACTN4
2958700	4250400	7766200	5007800		3655700	6646700	5305300	6544600	21.4965	22.0192	22.8888	22.2557		21.8017	22.6642	22.339	22.6419	3	2	3	R4GMT0	ACTR1A											R4GMT0	ACTR1A
8000200	5692000	8815400	7203700	5481700	6592800	7476800	10076000	9655400	22.9316	22.4405	23.0716	22.7803	22.3862	22.6525	22.834	23.2644	23.2029	3	3	3	P61160	ACTR2											P61160	ACTR2
6944900	9148100	10265000	8862800	5389300	7489500	10666000	11924000	14405000	22.7275	23.125	23.2912	23.0793	22.3617	22.8364	23.3465	23.5074	23.7801	3	3	3	P61158	ACTR3									YES	1	P61158	ACTR3
12232000	13701000	39292000	17910000	10656000	14774000	20699000	25150000	21617000	23.5442	23.7078	25.2277	24.0943	23.3452	23.8166	24.3031	24.5841	24.3657	3	3	3	P00813	ADA											P00813	ADA
3464200	3631000	4510700	4369700	3249300	4548700	4097400	4931900	5546000	21.7241	21.7919	22.1049	22.0591	21.6317	22.117	21.9663	22.2337	22.403	3	3	3	P55265	ADAR		YES	YES		YES	YES	YES	YES	YES	7	P55265	ADAR
2105400	1674900	2455800	2131700	1589000	1875700	2187800	2479200	2511800	21.0057	20.6756	21.2278	21.0236	20.5997	20.839	21.061	21.2414	21.2603	3	3	3	E7EV99	ADD1					YES					1	E7EV99	ADD1
3179200	3445600	5192000	5554700	4344800	3805600	6305400	4971700	5845100	21.6002	21.7163	22.3079	22.4053	22.0509	21.8597	22.5882	22.2453	22.4788	3	3	3	P11766	ADH5									YES	1	P11766	ADH5
1056900	1528800	1363000	1338200	1176500		1582800	1879000	2325800	20.0114	20.544	20.3784	20.3519	20.1661		20.594	20.8415	21.1493	3	2	3	P25098	ADRBK1											P25098	ADRBK1
2465400	2537200	2139500	2896600	1800600	2642500	2973700	3120600	4156900	21.2334	21.2748	21.0288	21.4659	20.78	21.3335	21.5038	21.5734	21.9871	3	3	3	P30520	ADSS									YES	1	P30520	ADSS
6891700	6441000	4886000	3195300	4504800	4873200	2766900	3044100	2745000	22.7164	22.6189	22.2202	21.6075	22.103	22.2164	21.3998	21.5376	21.3884	3	3	3	Q9Y4W6	AFG3L2	X										Q9Y4W6	AFG3L2
3080100	2875500	3232400	3267400	3197500	4038600	4477900	5167900	5123200	21.5545	21.4554	21.6242	21.6397	21.6085	21.9454	22.0944	22.3011	22.2886	3	3	3	O00116	AGPS	X								YES	1	O00116	AGPS
15913000	12595000	17020000	18149000	16705000	15788000	21105000	21769000	21444000	23.9237	23.5863	24.0207	24.1134	23.9938	23.9123	24.3311	24.3758	24.3541	3	3	3	P23526	AHCY									YES	1	P23526	AHCY
3514100	4668700	6458000	2575100	5447200	6892000	4919900	5826000	6070200	21.7447	22.1546	22.6227	21.2962	22.3771	22.7165	22.2302	22.4741	22.5333	3	3	3	O95433	AHSA1											O95433	AHSA1
5612400	7642200	8432800	6273300	5425300	6795300	10016000	10288000	10029000	22.4202	22.8656	23.0076	22.5808	22.3713	22.6961	23.2558	23.2945	23.2577	3	3	3	O95831	AIFM1											O95831	AIFM1
2819600	6585400	9107400	6373900		4093700	10216000	10847000	9190100	21.4271	22.6508	23.1186	22.6037		21.965	23.2843	23.3708	23.1316	3	2	3	Q13155	AIMP2	X								YES	1	Q13155	AIMP2	YES
3703100	2745200	4230200	3918500	2649500		3825900	3589600	3465500	21.8203	21.3885	22.0123	21.9019	21.3373		21.8674	21.7754	21.7246	3	2	3	O00170	AIP									YES	1	O00170	AIP
35608000	38350000	26591000	16710000	16329000	19583000	17814000	17357000	19169000	25.0857	25.1927	24.6644	23.9942	23.9609	24.2231	24.0865	24.049	24.1923	3	3	3	P54886	ALDH18A1	X				YES	YES			YES	3	P54886	ALDH18A1
4607400	2421600	3708700	1820400	1784000	1545000	1058400	1521400	1378000	22.1355	21.2075	21.8225	20.7958	20.7667	20.5592	20.0135	20.537	20.3941	3	3	3	P30038	ALDH4A1	X										P30038	ALDH4A1
2072300		1978000	1848900		1867400	2434000	2115100	2206300	20.9828		20.9156	20.8182		20.8326	21.2149	21.0123	21.0732	2	2	3	C9J8Q5	ALDH5A1											C9J8Q5	ALDH5A1
2472100	2507400	2117800	2857100	3467000	3352100	3875800	2065600	3244800	21.2373	21.2578	21.0141	21.4461	21.7253	21.6766	21.8861	20.9781	21.6297	3	3	3	P49189	ALDH9A1									YES	1	P49189	ALDH9A1
96936000	107760000	160140000	133770000	82804000	111260000	127060000	132070000	141470000	26.5305	26.6832	27.2548	26.9952	26.3032	26.7294	26.9209	26.9767	27.0759	3	3	3	P04075	ALDOA		YES				YES				2	P04075	ALDOA
23356000	22721000	29211000	29041000	16633000	19452000	33408000	30907000	27420000	24.4773	24.4375	24.8	24.7916	23.9875	24.2134	24.9937	24.8814	24.7087	3	3	3	P09972	ALDOC						YES				1	P09972	ALDOC
15273000	13058000	10651000	16035000	23586000	16549000	5428800	4313500	7227800	23.8645	23.6384	23.3445	23.9347	24.4914	23.9802	22.3722	22.0404	22.7851	3	3	3	O75342	ALOX12B	X										O75342	ALOX12B
5907000	7136200	3860600	9074700	10503000	5883500	4771000	3233900	4321100	22.494	22.7667	21.8804	23.1134	23.3243	22.4882	22.1859	21.6248	22.043	3	3	3	J3KPH2	ALOXE3											J3KPH2	ALOXE3
13335000	15362000	23272000	15859000	14011000	15693000	15670000	16642000	19008000	23.6687	23.8729	24.4721	23.9188	23.7401	23.9036	23.9015	23.9883	24.1801	3	3	3	Q86V81	ALYREF		YES	YES		YES	YES	YES	YES	YES	7	Q86V81	ALYREF
17183000	26923000	16542000	24114000	16670000	21075000	104840000	22748000	26320000	24.0345	24.6823	23.9796	24.5234	23.9908	24.329	26.6436	24.4392	24.6497	3	3	3	P04083	ANXA1									YES	1	P04083	ANXA1
28013000	30819000	15680000	28881000	23698000	18396000	20682000	23213000	14749000	24.7396	24.8773	23.9024	24.7836	24.4983	24.1329	24.3019	24.4684	23.8141	3	3	3	P07355	ANXA2			YES		YES				YES	3	P07355	ANXA2
10168000	13691000	19259000	14492000	5864100	12919000	20010000	21421000	21794000	23.2775	23.7067	24.199	23.7888	22.4835	23.623	24.2542	24.3525	24.3774	3	3	3	P08133	ANXA6									YES	1	P08133	ANXA6
7698500	7099300	8560100	9259800	11123000	12397000	9532200	11572000	13279000	22.8761	22.7592	23.0292	23.1425	23.407	23.5635	23.1844	23.4641	23.6626	3	3	3	P63010	AP2B1									YES	1	P63010	AP2B1
5148100	3031700	4172400	3566400		4061500	2990500	3274100	2779400	22.2956	21.5317	21.9924	21.766		21.9536	21.512	21.6427	21.4063	3	2	3	C9JIF9	APEH					YES					1	C9JIF9	APEH
2113800	846920	842460	3950700	4427700	8482100	1180300	48741000	1012000	21.0114	19.6919	19.6842	21.9137	22.0781	23.016	20.1707	25.5386	19.9488	3	3	3	C9JF17	APOD	X										C9JF17	APOD
7008800	4727100	5271500	6929700	4911200	6001100	3912600	4778700	4367200	22.7407	22.1725	22.3298	22.7244	22.2276	22.5168	21.8997	22.1882	22.0583	3	3	3	P07741	APRT											P07741	APRT
4374700	4493600	4727300	3356600	6070800	4834300	4625500	4458700	4453800	22.0608	22.0994	22.1726	21.6786	22.5335	22.2049	22.1412	22.0882	22.0866	3	3	3	P48444	ARCN1					YES	YES			YES	3	P48444	ARCN1
9795000	12540000	7513700	14620000	12004000	11925000	13239000	13327000	15050000	23.2236	23.58	22.8411	23.8014	23.517	23.5075	23.6583	23.6678	23.8433	3	3	3	P84077	ARF1		YES								1	P84077	ARF1
36258000	32899000	21055000	45081000	27871000	20064000	20344000	19282000	21219000	25.1118	24.9715	24.3277	25.426	24.7323	24.2581	24.2781	24.2008	24.3389	3	3	3	P05089	ARG1											P05089	ARG1
11198000	11448000	21239000	16903000	13181000	11058000	13364000	10153000	12542000	23.4167	23.4486	24.3402	24.0108	23.652	23.3986	23.6718	23.2754	23.5803	3	3	3	J3KTF8	ARHGDIA											J3KTF8	ARHGDIA
13669000	15899000	28264000	19483000		11437000	20852000	17535000	25800000	23.7044	23.9224	24.7525	24.2157		23.4472	24.3137	24.0637	24.6209	3	2	3	P52566	ARHGDIB											P52566	ARHGDIB
3709000	3732000	6234900	4822900	2514400	2849100	6510600	5092200	7411700	21.8226	21.8315	22.5719	22.2015	21.2618	21.4421	22.6344	22.2799	22.8214	3	3	3	V9GYM8	ARHGEF2						YES				1	V9GYM8	ARHGEF2
	2891100	2032200	1910900	2898700	2396900	3102900	3540700	4356700		21.4632	20.9546	20.8658	21.467	21.1927	21.5652	21.7556	22.0548	2	3	3	Q15052	ARHGEF6											Q15052	ARHGEF6
9106800	12013000	7966800	10912000	12812000	16359000	8399900	9370900	10059000	23.1185	23.5181	22.9256	23.3794	23.611	23.9636	23.0019	23.1598	23.262	3	3	3	O15143	ARPC1B						YES			YES	2	O15143	ARPC1B
5105900	8596500	5790700	8554600	5904500	7067200	9362100	9619700	9724000	22.2837	23.0353	22.4653	23.0283	22.4934	22.7527	23.1584	23.1976	23.2131	3	3	3	F8WCF6	ARPC4-TTLL3											F8WCF6	ARPC4-TTLL3
4100700	3771400	2288200	5524600	5673900	4734700	3479200	2681300	3002600	21.9674	21.8467	21.1258	22.3974	22.4359	22.1748	21.7303	21.3545	21.5178	3	3	3	E7EMM4	ASAH1											E7EMM4	ASAH1
13066000	14923000	10629000	8374400	6493900	7707000	12704000	13269000	10536000	23.6393	23.831	23.3415	22.9976	22.6307	22.8777	23.5988	23.6616	23.3288	3	3	3	Q9NVI7	ATAD3A											Q9NVI7	ATAD3A
29935000	30788000	41306000	32049000	25171000	26784000	40601000	42444000	44482000	24.8353	24.8759	25.2998	24.9338	24.5853	24.6749	25.275	25.3391	25.4067	3	3	3	P31939	ATIC									YES	1	P31939	ATIC
7026300	9402800	6212200	4272500	3858100	5820800	6900900	10298000	13381000	22.7443	23.1647	22.5667	22.0266	21.8795	22.4728	22.7184	23.2959	23.6737	3	3	3	Q6DD88	ATL3									YES	1	Q6DD88	ATL3
3939600	4489900	4510900	5898800	7069500	7267300	5820600	4958600	5025300	21.9096	22.0983	22.105	22.492	22.7532	22.793	22.4727	22.2415	22.2608	3	3	3	Q9HD20	ATP13A1											Q9HD20	ATP13A1
40633000	33863000	22800000	33870000	28587000	31779000	38657000	42530000	49689000	25.2761	25.0132	24.4425	25.0135	24.7689	24.9216	25.2042	25.342	25.5664	3	3	3	P05023	ATP1A1			YES			YES			YES	3	P05023	ATP1A1
1902400	2523400			2712300	2497800	2906400	2796200	6033500	20.8594	21.2669			21.3711	21.2522	21.4708	21.415	22.5246	2	2	3	C9JA36	ATP1B3											C9JA36	ATP1B3
25153000	15153000	15314000	22576000	20201000	22704000	21793000	27140000	32387000	24.5842	23.8531	23.8683	24.4283	24.2679	24.4364	24.3774	24.6939	24.9489	3	3	3	P16615	ATP2A2			YES						YES	2	P16615	ATP2A2
2114900	1691300		1900000		1974800	1707500	1759200	2968100	21.0122	20.6897		20.8576		20.9133	20.7035	20.7465	21.5011	2	2	3	Q93084	ATP2A3											Q93084	ATP2A3
5127200	3853900	4011400	4145000	4100100	5050500	5202700	5667700	6736400	22.2897	21.8779	21.9357	21.9829	21.9672	22.268	22.3108	22.4343	22.6835	3	3	3	P23634	ATP2B4											P23634	ATP2B4
279760000	320320000	307590000	267900000	197640000	253960000	320990000	311990000	312410000	28.0596	28.2549	28.1964	27.9971	27.5583	27.92	28.258	28.2169	28.2189	3	3	3	P25705	ATP5A1					YES	YES				2	P25705	ATP5A1
162270000	213720000	202040000	206340000	130550000	144140000	180590000	164840000	185520000	27.2738	27.6711	27.5901	27.6204	26.96	27.1029	27.4281	27.2965	27.467	3	3	3	P06576	ATP5B			YES							1	P06576	ATP5B
8079400	11358000	7308500	8092800	7189800	11821000	9356200	6166900	10834000	22.9458	23.4372	22.8011	22.9482	22.7775	23.4948	23.1575	22.5561	23.3691	3	3	3	P36542	ATP5C1					YES	YES				2	P36542	ATP5C1
6282900	4692200	5399000	7790600	6211600	6132200	8980100	9568000	12935000	22.583	22.1618	22.3643	22.8933	22.5665	22.548	23.0983	23.1898	23.6248	3	3	3	Q5QNZ2	ATP5F1	X										Q5QNZ2	ATP5F1
10280000	7158500	16619000	19092000	8242100	10380000	13865000	20041000	10546000	23.2933	22.7712	23.9863	24.1865	22.9746	23.3073	23.7249	24.2565	23.3302	3	3	3	O75964	ATP5L											O75964	ATP5L
32919000	34520000	33384000	32324000	13325000	25845000	31658000	27534000	31313000	24.9724	25.0409	24.9927	24.9461	23.6676	24.6234	24.9161	24.7147	24.9003	3	3	3	P48047	ATP5O											P48047	ATP5O
2032200	2769700	3078700	2288200		2077200	2916500	3976100	2952400	20.9546	21.4013	21.5539	21.1258		20.9862	21.4758	21.9229	21.4935	3	2	3	P38606	ATP6V1A									YES	1	P38606	ATP6V1A
3019100	3410200	4023500	3836900		2935200	3201700	3782700	4587300	21.5257	21.7014	21.94	21.8715		21.485	21.6104	21.851	22.1292	3	2	3	P21281	ATP6V1B2									YES	1	P21281	ATP6V1B2
6256300	7641800	7190900	7321500	5971000	6805600	11482000	9299500	8245900	22.5769	22.8655	22.7777	22.8037	22.5095	22.6983	23.4529	23.1487	22.9752	3	3	3	Q9UBB4	ATXN10									YES	1	Q9UBB4	ATXN10
18271000	15459000	17272000	24239000	41387000	36445000	5059400	6979200	6306700	24.1231	23.8819	24.0419	24.5308	25.3027	25.1192	22.2705	22.7346	22.5885	3	3	3	Q8WWM7	ATXN2L	X	YES	YES		YES	YES			YES	5	Q8WWM7	ATXN2L
4963300	3047100	2099700	6010800	5417300	7786500	2251700	22544000	1512700	22.2429	21.539	21.0018	22.5191	22.3691	22.8925	21.1026	24.4262	20.5287	3	3	3	P25311	AZGP1											P25311	AZGP1
2226200	2238200	1740300	1882800	1783000	1473300	1763700	1604300	2431000	21.0862	21.0939	20.7309	20.8444	20.7659	20.4906	20.7502	20.6135	21.2131	3	3	3	Q9UIG0	BAZ1B						YES			YES	2	Q9UIG0	BAZ1B
7002400	5123600	2511200	8372900	11804000	11366000	1411500	1546100	3932300	22.7394	22.2887	21.2599	22.9973	23.4928	23.4382	20.4288	20.5602	21.9069	3	3	3	E9PK09	BCLAF1	X	YES	YES		YES		YES	YES		5	E9PK09	BCLAF1
7192100	7861600	3843300	11854000	6565600	8243500	5437400	5548000	8438900	22.778	22.9064	21.8739	23.4989	22.6465	22.9748	22.3745	22.4035	23.0086	3	3	3	K7ES02	BLMH											K7ES02	BLMH
4572500	4473800	3311600	3458900	3452300	4642300	3900900	4450200	4136500	22.1246	22.0931	21.6591	21.7219	21.7191	22.1464	21.8954	22.0854	21.98	3	3	3	Q14137	BOP1					YES				YES	2	Q14137	BOP1
2963300	2618000	6951600	4137700	2639300	3091200	4958200	6538500	5255000	21.4988	21.32	22.7289	21.9804	21.3317	21.5597	22.2414	22.6405	22.3253	3	3	3	A0A087X2B5	BSG											A0A087X2B5	BSG
22187000	17782000	14611000	22339000	39600000	26766000	10862000	12876000	13282000	24.4032	24.0839	23.8006	24.4131	25.239	24.6739	23.3728	23.6182	23.663	3	3	3	J3QT28	BUB3	X										J3QT28	BUB3
	596710	679500	1099800	1040400		839170		619350		19.1867	19.3741	20.0688	19.9887		19.6786		19.2404	2	2	2	E9PQS1	C11orf54											E9PQS1	C11orf54
3014300	3110500	3738000	3926000	2996800	3703900	3972200	3185600	3671900	21.5234	21.5687	21.8338	21.9046	21.515	21.8206	21.9215	21.6031	21.8081	3	3	3	Q9Y224	C14orf166			YES		YES					2	Q9Y224	C14orf166		YES	YES
25114000	21332000	22289000	21064000	27321000	22269000	21355000	21691000	25333000	24.582	24.3465	24.4098	24.3283	24.7035	24.4085	24.3481	24.3706	24.5945	3	3	3	A0A0A6YYC3	C7orf55-LUC7L2											A0A0A6YYC3	C7orf55-LUC7L2
9593200	18308000	23946000	18660000	15412000	16185000	16366000	19528000	20225000	23.1936	24.126	24.5133	24.1534	23.8776	23.9482	23.9642	24.219	24.2696	3	3	3	Q9HB71	CACYBP			YES						YES	2	Q9HB71	CACYBP
22279000	20779000	22022000	23395000	19606000	19609000	30637000	29523000	32847000	24.4092	24.3086	24.3924	24.4797	24.2248	24.225	24.8688	24.8153	24.9693	3	3	3	F8VPD4	CAD	X										F8VPD4	CAD
2826900	4903300	13278000	5381100		2669200	8175200	6903400	6578200	21.4308	22.2253	23.6625	22.3595		21.348	22.9628	22.7189	22.6493	3	2	3	P27797	CALR			YES		YES					2	P27797	CALR
16538000	16941000	23775000	20163000	15102000	18421000	26563000	25225000	28300000	23.9793	24.014	24.5029	24.2652	23.8482	24.1348	24.6629	24.5884	24.7543	3	3	3	Q86VP6	CAND1			YES						YES	2	Q86VP6	CAND1
3872800	4279400	14892000	6205400	2940300	3735900	15712000	17019000	14332000	21.8849	22.029	23.828	22.5651	21.4875	21.833	23.9054	24.0206	23.7727	3	3	3	P27824	CANX	X	YES	YES		YES	YES			YES	5	P27824	CANX
7488900	6962500	11102000	9634500	8441600	11266000	10738000	10119000	10747000	22.8363	22.7312	23.4043	23.1998	23.0091	23.4255	23.3562	23.2706	23.3574	3	3	3	Q01518	CAP1									YES	1	Q01518	CAP1
5343300	6195100	14744000	5730200	3039600	7249200	10607000	10084000	10751000	22.3493	22.5627	23.8136	22.4502	21.5355	22.7894	23.3385	23.2656	23.358	3	3	3	P40121	CAPG									YES	1	P40121	CAPG
4211900	4377500	3764200	3462100	3818500	4429300	3960100	4328800	4751300	22.006	22.0617	21.8439	21.7232	21.8646	22.0786	21.9171	22.0455	22.1799	3	3	3	P07384	CAPN1									YES	1	P07384	CAPN1
28616000	22698000	33932000	21436000	38309000	35889000	6824400	7575700	6006200	24.7703	24.4361	25.0161	24.3535	25.1912	25.097	22.7023	22.8529	22.518	3	3	3	Q14444	CAPRIN1	X	YES	YES		YES	YES			YES	5	Q14444	CAPRIN1		YES
9730100	9547800	21443000	13619000	10753000	14587000	14565000	15269000	14964000	23.214	23.1867	24.354	23.6991	23.3582	23.7982	23.796	23.8641	23.835	3	3	3	P52907	CAPZA1									YES	1	P52907	CAPZA1
3694800	4378900	3220700	3956800	3980500		2861700	2691300	2469200	21.8171	22.0621	21.6189	21.9159	21.9245		21.4484	21.3599	21.2356	3	2	3	P47755	CAPZA2											P47755	CAPZA2
10707000	8559900	6064400	9631900	8796800	13289000	12809000	12510000	10640000	23.3521	23.0292	22.5319	23.1994	23.0685	23.6637	23.6107	23.5766	23.343	3	3	3	B1AK87	CAPZB											B1AK87	CAPZB
11322000	6394800	7231600	8646800	17063000	10062000	4072800	3556100	3190500	23.4326	22.6085	22.7859	23.0437	24.0244	23.2624	21.9576	21.7619	21.6054	3	3	3	P31944	CASP14	X										P31944	CASP14
21273000	13673000	13726000	24394000	26916000	16380000	11866000	11498000	14081000	24.3425	23.7048	23.7104	24.54	24.682	23.9654	23.5003	23.4549	23.7472	3	3	3	CATA_HUMAN	CAT						YES				1	CATA_HUMAN	CAT
2028500		2737300	1504400		1574500	2719500		2436600	20.952		21.3843	20.5208		20.5865	21.3749		21.2164	2	2	2	Q13185	CBX3									YES	1	Q13185	CBX3
13999000	16562000	14910000	15047000	14383000	15329000	14958000	19075000	18466000	23.7388	23.9814	23.8298	23.843	23.7779	23.8698	23.8344	24.1852	24.1384	3	3	3	Q8N163	CCAR2		YES	YES		YES		YES	YES	YES	6	Q8N163	CCAR2
2108300	2306300	1805600	1644600		1780300	2085700	1998600	1926600	21.0076	21.1371	20.784	20.6493		20.7637	20.9921	20.9306	20.8776	3	2	3	A0A0A0MRN7	CCBL2											A0A0A0MRN7	CCBL2
2202700	3366800	2490000	2550600	1824100	3597700	2318900	3615800	3434000	21.0708	21.6829	21.2477	21.2824	20.7988	21.7786	21.145	21.7859	21.7115	3	3	3	P14635	CCNB1											P14635	CCNB1
46107000	42865000	51912000	49960000	36833000	44552000	63199000	66477000	71339000	25.4585	25.3533	25.6296	25.5743	25.1345	25.409	25.9134	25.9864	26.0882	3	3	3	P78371	CCT2						YES			YES	2	P78371	CCT2
32287000	38888000	60387000	40509000	28460000	33883000	58708000	50895000	59842000	24.9445	25.2128	25.8477	25.2717	24.7624	25.0141	25.8071	25.601	25.8347	3	3	3	P49368	CCT3		YES							YES	2	P49368	CCT3
61491000	68809000	78304000	77800000	52031000	62555000	99400000	97131000	108870000	25.8739	26.0361	26.2226	26.2133	25.6329	25.8986	26.5667	26.5334	26.698	3	3	3	P50991	CCT4			YES		YES				YES	3	P50991	CCT4
23500000	20102000	31750000	24698000	21126000	20474000	34772000	31707000	34945000	24.4862	24.2608	24.9203	24.5579	24.3325	24.2873	25.0514	24.9183	25.0586	3	3	3	P48643	CCT5									YES	1	P48643	CCT5
50151000	45863000	72270000	51643000	43752000	49745000	74501000	60252000	78336000	25.5798	25.4508	26.1069	25.6221	25.3828	25.568	26.1508	25.8445	26.2232	3	3	3	P40227	CCT6A					YES				YES	2	P40227	CCT6A
58711000	64075000	73025000	71268000	47365000	75689000	94727000	87880000	106230000	25.8071	25.9333	26.1219	26.0868	25.4973	26.1736	26.4973	26.389	26.6626	3	3	3	Q99832	CCT7									YES	1	Q99832	CCT7
95273000	89545000	98660000	84859000	69599000	109010000	115770000	136410000	124290000	26.5056	26.4161	26.556	26.3386	26.0526	26.6999	26.7867	27.0234	26.8891	3	3	3	P50990	CCT8									YES	1	P50990	CCT8
9448900	7897300	9043400	7864900	8509700	10036000	9384500	11018000	10562000	23.1717	22.9129	23.1084	22.907	23.0207	23.2587	23.1618	23.3934	23.3324	3	3	3	E9PSH8	CD3E											E9PSH8	CD3E
10596000	6940700	6110500	8785300	9482900	11237000	11222000	11567000	9988900	23.337	22.7266	22.5429	23.0667	23.1769	23.4218	23.4198	23.4635	23.2519	3	3	3	Q08722	CD47											Q08722	CD47
12135000	10956000	13742000	11375000	8948600	12388000	11277000	10186000	9755400	23.5327	23.3852	23.7121	23.4394	23.0932	23.5624	23.4269	23.2801	23.2178	3	3	3	A0A024QZP7	CDC2											A0A024QZP7	CDC2
4672500	5669100	5758700	6738000	6265400	4221900	4291100	4887700	6614000	22.1558	22.4347	22.4573	22.6839	22.579	22.0095	22.0329	22.2207	22.6571	3	3	3	Q16543	CDC37									YES	1	Q16543	CDC37
3239400	4600200	4749700	4263800	6062900	5538400	6659700	4395200	5498300	21.6273	22.1333	22.1794	22.0237	22.5316	22.401	22.667	22.0675	22.3906	3	3	3	P60953	CDC42											P60953	CDC42
5248200	7424500	7671300	6891600	5564200	6006000	8724100	8783900	8890500	22.3234	22.8239	22.871	22.7164	22.4077	22.518	23.0566	23.0664	23.0838	3	3	3	Q99459	CDC5L		YES						YES	YES	3	Q99459	CDC5L
17972000	19282000	22600000	20177000	12575000	20097000	20095000	24200000	24085000	24.0992	24.2008	24.4298	24.2662	23.5841	24.2605	24.2603	24.5285	24.5216	3	3	3	Q00534	CDK6											Q00534	CDK6
58655000	45164000	49171000	59796000	82756000	40668000	32402000	35002000	26263000	25.8058	25.4287	25.5513	25.8335	26.3024	25.2774	24.9496	25.0609	24.6465	3	3	3	G8JLG2	CDSN											G8JLG2	CDSN
4901300	6185000	4800800	5251600	5358800	5479300	5219300	6213000	7174700	22.2247	22.5603	22.1948	22.3243	22.3535	22.3856	22.3154	22.5669	22.7745	3	3	3	Q7Z7K6	CENPV											Q7Z7K6	CENPV
2720500	2617800	3075000	2871500	2182400	2910500	3385500	4045900	4468100	21.3754	21.3199	21.5522	21.4534	21.0575	21.4728	21.6909	21.948	22.0912	3	3	3	Q9Y6A4	CFAP20		YES								1	Q9Y6A4	CFAP20
19147000	35705000	54782000	27465000	18493000	16561000	40457000	26627000	21615000	24.1906	25.0896	25.7072	24.7111	24.1405	23.9813	25.2699	24.6664	24.3655	3	3	3	P23528	CFL1			YES			YES			YES	3	P23528	CFL1		YES
4602000	4056300	3646500	3694100	3721900	4955800	5780700	6161500	5453300	22.1338	21.9517	21.7981	21.8168	21.8276	22.2407	22.4628	22.5549	22.3787	3	3	3	C9JRZ6	CHCHD3						YES				1	C9JRZ6	CHCHD3
7214700	7524500	5205200	6236300	5538800	7793900	9405400	10773000	10304000	22.7825	22.8432	22.3115	22.5723	22.4011	22.8939	23.1651	23.3609	23.2967	3	3	3	F5GWX5	CHD4											F5GWX5	CHD4
5534600	3862100	4427600	2425300	3048100	4925500	1795600	2793000	2578600	22.4	21.881	22.0781	21.2097	21.5395	22.2318	20.776	21.4134	21.2982	3	3	3	H0YE91	CHI3L2	X										H0YE91	CHI3L2
4186900	6949300	4045600	8109000	9317500	5629200	5644000	5077600	5226100	21.9975	22.7284	21.9479	22.9511	23.1515	22.4245	22.4283	22.2757	22.3173	3	3	3	Q9UHD1	CHORDC1									YES	1	Q9UHD1	CHORDC1
2794400	1847200	2803900	2343200	3418100	2477400	2890200	3183100	4250100	21.4141	20.8169	21.419	21.16	21.7048	21.2404	21.4627	21.602	22.0191	3	3	3	X6R700	CHTOP		YES	YES		YES	YES	YES	YES		6	X6R700	CHTOP
4438100	5511000	6985600	6654700	3341500	5350600	8761400	10412000	10702000	22.0815	22.3939	22.736	22.6659	21.6721	22.3513	23.0627	23.3117	23.3514	3	3	3	Q14008	CKAP5	X								YES	1	Q14008	CKAP5
20287000	20532000	37951000	29586000	16998000	21007000	32854000	30312000	31117000	24.2741	24.2914	25.1776	24.8184	24.0189	24.3244	24.9696	24.8534	24.8912	3	3	3	O00299	CLIC1									YES	1	O00299	CLIC1
3881800	5257700	4574500	3648100	3908400	4172300	2658400	3870400	3989200	21.8883	22.326	22.1252	21.7987	21.8981	21.9924	21.3421	21.8841	21.9277	3	3	3	M0R208	CLPP											M0R208	CLPP
30079000	27600000	20743000	7621100	12508000	12887000	8688500	8499700	9431100	24.8423	24.7182	24.3061	22.8616	23.5763	23.6194	23.0507	23.019	23.169	3	3	3	O76031	CLPX	X										O76031	CLPX
21712000	32551000	37978000	33112000	33041000	29629000	43763000	42031000	50080000	24.372	24.9562	25.1787	24.9809	24.9778	24.8205	25.3832	25.325	25.5777	3	3	3	A0A087WVQ6	CLTC		YES	YES							2	A0A087WVQ6	CLTC
7656500	8906500	8126200	5370700	5640900	7513400	8494500	11780000	9505900	22.8683	23.0864	22.9541	22.3567	22.4275	22.841	23.0181	23.4898	23.1804	3	3	3	Q96KP4	CNDP2						YES			YES	2	Q96KP4	CNDP2
1580800	2045700	1728600	2470200		2204000	3042900	1890700	2447600	20.5922	20.9642	20.7212	21.2362		21.0717	21.537	20.8505	21.2229	3	2	3	P21964	COMT											P21964	COMT
15377000	17504000	12052000	13374000	12795000	18328000	21038000	21537000	24038000	23.8743	24.0612	23.5228	23.6729	23.6091	24.1275	24.3265	24.3603	24.5188	3	3	3	P53621	COPA									YES	1	P53621	COPA
3355700	2324700	6932500	3630100	2334700	2353000	5216200	3786300	6202600	21.6782	21.1486	22.7249	21.7916	21.1548	21.1661	22.3146	21.8524	22.5644	3	3	3	P53618	COPB1						YES			YES	2	P53618	COPB1
15045000	16114000	14428000	17420000	18386000	19079000	18616000	19800000	17572000	23.8428	23.9418	23.7824	24.0542	24.1321	24.1855	24.15	24.239	24.0668	3	3	3	P35606	COPB2									YES	1	P35606	COPB2
3366900	4418300	6412000	5517400	4322300	5543600	10702000	9401300	8984800	21.683	22.0751	22.6123	22.3956	22.0434	22.4024	23.3514	23.1644	23.0991	3	3	3	Q9Y678	COPG1	X					YES			YES	2	Q9Y678	COPG1
1665900	1872600	4076200	2586200		2055900	2625500	3607200	2460600	20.6679	20.8366	21.9588	21.3024		20.9713	21.3242	21.7824	21.2306	3	2	3	D6RAX7	COPS4											D6RAX7	COPS4
81300000	73717000	112660000	96468000	83839000	86788000	95936000	108600000	104880000	26.2768	26.1355	26.7474	26.5235	26.3211	26.371	26.5156	26.6944	26.6442	3	3	3	P31146	CORO1A					YES					1	P31146	CORO1A
6216200	3776200	11629000	4532400	5568800	8695100	8790500	7326400	9067800	22.5676	21.8485	23.4712	22.1118	22.4089	23.0518	23.0675	22.8047	23.1123	3	3	3	P13073	COX4I1											P13073	COX4I1
	2159000	2647000	2244600		2028900	1794600	1571700	2253400		21.0419	21.3359	21.098		20.9523	20.7752	20.5839	21.1037	2	2	3	O75131	CPNE3					YES				YES	2	O75131	CPNE3
8621400	5418200	9187300	7762900	7497000	5977900	9783100	8904700	9737900	23.0395	22.3694	23.1312	22.8882	22.8379	22.5112	23.2219	23.0861	23.2152	3	3	3	P50416	CPT1A											P50416	CPT1A
2232100	2526600	2048500	2304500	1667500	2044000	2219300	2500100	2643500	21.09	21.2688	20.9661	21.136	20.6693	20.963	21.0817	21.2536	21.334	3	3	3	Q08257	CRYZ											Q08257	CRYZ
33622000	24116000	21876000	21144000	13220000	20071000	20145000	18661000	22614000	25.0029	24.5235	24.3828	24.3337	23.6562	24.2586	24.2639	24.1535	24.4307	3	3	3	B4DJV2	CS		YES								1	B4DJV2	CS
40294000	45778000	42378000	32955000	42093000	38226000	13447000	15550000	18907000	25.2641	25.4482	25.3368	24.974	25.3271	25.1881	23.6808	23.8904	24.1724	3	3	3	O75534	CSDE1	X	YES	YES		YES	YES		YES	YES	6	O75534	CSDE1
47685000	39643000	36696000	44089000	93318000	64174000	66205000	77297000	75755000	25.507	25.2406	25.1291	25.3939	26.4757	25.9355	25.9804	26.2039	26.1748	3	3	3	P55060	CSE1L	X		YES			YES			YES	3	P55060	CSE1L
4128900	5646000	3621400	5201900	6038200	4436900	5717100	5887900	6660100	21.9773	22.4288	21.7881	22.3106	22.5257	22.0811	22.4469	22.4893	22.6671	3	3	3	P41240	CSK									YES	1	P41240	CSK
2302900		2014300	2907000		2400300	1944700	1866900	2490800	21.135		20.9418	21.4711		21.1948	20.8911	20.8322	21.2482	2	2	3	Q13363	CTBP1											Q13363	CTBP1
1666900	3336400	6191600	5202400		5293300	8064100	6985400	6729900	20.6687	21.6699	22.5619	22.3107		22.3357	22.9431	22.7359	22.6822	3	2	3	P17812	CTPS1									YES	1	P17812	CTPS1
19434000	22213000	24774000	37247000	25469000	30812000	16382000	19451000	15497000	24.2121	24.4049	24.5623	25.1506	24.6022	24.877	23.9656	24.2133	23.8855	3	3	3	CATD_HUMAN	CTSD											CATD_HUMAN	CTSD
11683000	11503000	12314000	14629000	13346000	15378000	14507000	13231000	15553000	23.4779	23.4555	23.5538	23.8023	23.6699	23.8744	23.7902	23.6574	23.8907	3	3	3	P00387	CYB5R3									YES	1	P00387	CYB5R3
7855900	7089800	7881700	8501900	7788500	8620900	9272400	8409800	8005600	22.9053	22.7573	22.9101	23.0194	22.8929	23.0394	23.1445	23.0036	22.9326	3	3	3	F5GXX5	DAD1											F5GXX5	DAD1
15715000	15223000	17638000	17540000	15147000	23424000	20415000	23110000	24909000	23.9056	23.8597	24.0722	24.0641	23.8525	24.4815	24.2831	24.462	24.5702	3	3	3	P14868	DARS					YES				YES	2	P14868	DARS
22330000	9002800	4700900	17732000	19725000	11537000	14022000	5931500	4698600	24.4125	23.1019	22.1645	24.0799	24.2335	23.4598	23.7412	22.5	22.1638	3	3	3	P81605	DCD					YES					1	P81605	DCD
20052000	12180000	14191000	17643000	14405000	16136000	20752000	21640000	24442000	24.2572	23.538	23.7585	24.0726	23.7801	23.9438	24.3067	24.3672	24.5429	3	3	3	Q16531	DDB1									YES	1	Q16531	DDB1
49896000	36261000	35941000	11569000	47751000	41699000		17756000	27893000	25.5724	25.1119	25.0991	23.4638	25.509	25.3135		24.0818	24.7334	3	3	2	Q8IXT1	DDIAS											Q8IXT1	DDIAS
22282000	27321000	23869000	29073000	28029000	30015000	31355000	29140000	28802000	24.4094	24.7035	24.5086	24.7932	24.7404	24.8392	24.9022	24.7965	24.7797	3	3	3	A0A0C4DGS1	DDOST											A0A0C4DGS1	DDOST
5010800	5761100	6913000	7561800	5763200	6410800	5585200	5797500	6228800	22.2566	22.4579	22.7209	22.8503	22.4584	22.6121	22.4132	22.467	22.5705	3	3	3	F1T0B3	DDX1		YES	YES		YES					3	F1T0B3	DDX1			YES
50189000	54399000	37837000	57873000	62490000	55969000	44408000	45402000	49520000	25.5809	25.6971	25.1733	25.7864	25.8971	25.7381	25.4043	25.4363	25.5615	3	3	3	H3BLZ8	DDX17		YES	YES		YES	YES	YES	YES		6	H3BLZ8	DDX17	YES
64184000	67800000	39312000	36074000	37706000	40789000	41788000	43592000	46908000	25.9357	26.0148	25.2285	25.1045	25.1683	25.2817	25.3166	25.3776	25.4833	3	3	3	Q9NR30	DDX21		YES	YES		YES	YES	YES	YES	YES	7	Q9NR30	DDX21	YES
3789900	3921700	2561000	4491200	4512800	4321700	3936900	4525600	5152000	21.8537	21.903	21.2883	22.0987	22.1056	22.0432	21.9086	22.1097	22.2967	3	3	3	Q9BUQ8	DDX23		YES							YES	2	Q9BUQ8	DDX23
3045700	3938700	2041300	2368400		2264900	2745400	3861400	2947600	21.5383	21.9093	20.9611	21.1755		21.111	21.3886	21.8807	21.4911	3	2	3	F5GYL3	DDX24		YES	YES		YES		YES	YES		5	F5GYL3	DDX24
21560000	17103000	29417000	21627000	18883000	28288000	27303000	26578000	29569000	24.3619	24.0277	24.8101	24.3663	24.1706	24.7537	24.7026	24.6637	24.8176	3	3	3	Q13838	DDX39B		YES			YES		YES	YES	YES	5	Q13838	DDX39B		YES
16383000	13170000	13965000	14067000	16199000	16932000	10094000	10768000	10601000	23.9657	23.6508	23.7353	23.7458	23.9494	24.0132	23.267	23.3602	23.3377	3	3	3	A0A0D9SFB3	DDX3X		YES			YES			YES		3	A0A0D9SFB3	DDX3X	YES	YES
16396000	14934000	8011300	13810000	16943000	23710000	11673000	12407000	15617000	23.9668	23.8321	22.9336	23.7192	24.0142	24.499	23.4767	23.5647	23.8966	3	3	3	A0A0C4DG89	DDX46		YES								1	A0A0C4DG89	DDX46
93845000	87974000	85414000	95841000	108620000	105870000	95836000	85226000	87433000	26.4838	26.3906	26.348	26.5141	26.6947	26.6577	26.5141	26.3448	26.3817	3	3	3	J3KTA4	DDX5		YES	YES		YES	YES				4	J3KTA4	DDX5	YES		YES
10630000	13061000	8757500	15242000	7161600	15201000	9533200	7814400	10589000	23.3416	23.6388	23.0621	23.8615	22.7719	23.8577	23.1845	22.8977	23.3361	3	3	3	P26196	DDX6		YES	YES		YES				YES	4	P26196	DDX6
5869800	7030700	5291300	2015000	3176400	3670800	3550600	6482400	8051600	22.4849	22.7452	22.3352	20.9423	21.599	21.8077	21.7596	22.6281	22.9408	3	3	3	P35659	DEK		YES	YES		YES				YES	4	P35659	DEK
3325400	3342800	3614000		14041000	4935400	2446900	2139300	2450800	21.6651	21.6726	21.7852		23.7431	22.2347	21.2225	21.0287	21.2248	3	2	3	B4E1G1	DERL1	X										B4E1G1	DERL1
3389800	1616300	3281000	2866200	4658400	4611800	2043800	4042600	5331100	21.6928	20.6243	21.6457	21.4507	22.1514	22.1369	20.9628	21.9469	22.346	3	3	3	Q9UBM7	DHCR7			YES							1	Q9UBM7	DHCR7
25768000	24757000	17784000	25989000	28146000	26322000	25750000	27106000	32351000	24.6191	24.5613	24.0841	24.6314	24.7464	24.6498	24.6181	24.6921	24.9473	3	3	3	O43143	DHX15		YES	YES	YES	YES	YES	YES	YES	YES	8	O43143	DHX15
830430	735460	662210	749850		742250		855000	1563200	19.6635	19.4883	19.3369	19.5162		19.5015		19.7056	20.5761	3	2	2	O60231	DHX16		YES			YES				YES	3	O60231	DHX16
18445000	17704000	13698000	14969000	22974000	21899000	7820500	7815500	9260100	24.1367	24.0776	23.7075	23.8355	24.4535	24.3844	22.8988	22.8979	23.1426	3	3	3	H7BXY3	DHX30	X	YES			YES	YES	YES			4	H7BXY3	DHX30
64688000	66080000	51035000	60818000	65319000	68665000	68550000	71399000	76899000	25.947	25.9777	25.605	25.858	25.961	26.0331	26.0307	26.0894	26.1965	3	3	3	Q08211	DHX9		YES	YES		YES	YES	YES	YES	YES	7	Q08211	DHX9	YES		YES
6001200	6813500	11173000	6867300	7711200	5980700	10123000	9967800	12868000	22.5168	22.7	23.4135	22.7113	22.8785	22.5119	23.2711	23.2488	23.6173	3	3	3	A0A140T8Z0	DIAPH1					YES					1	A0A140T8Z0	DIAPH1
8718200	8210100	9301900	9169700	7737600	9089300	10150000	10286000	11869000	23.0556	22.969	23.1491	23.1284	22.8835	23.1157	23.275	23.2942	23.5007	3	3	3	P10515	DLAT						YES			YES	2	P10515	DLAT
15394000	18757000	14481000	17864000	9770400	15839000	20227000	17741000	20741000	23.8759	24.1609	23.7877	24.0906	23.22	23.917	24.2698	24.0806	24.306	3	3	3	P31689	DNAJA1						YES			YES	2	P31689	DNAJA1
7974000	7788700	4854200	4953200	5336800	5216500	5102800	4863800	5307400	22.9269	22.893	22.2108	22.2399	22.3475	22.3147	22.2829	22.2137	22.3396	3	3	3	Q96EY1	DNAJA3											Q96EY1	DNAJA3
7014300	9108100	9793600	10608000	5497200	8945000	11970000	11208000	12247000	22.7419	23.1187	23.2234	23.3386	22.3903	23.0927	23.5129	23.418	23.5459	3	3	3	P25685	DNAJB1											P25685	DNAJB1
3160000	2140900	2743200	2128200	2057500	2015900	2940400	3404300	3919800	21.5915	21.0298	21.3874	21.0212	20.9725	20.943	21.4876	21.6989	21.9023	3	3	3	Q99615	DNAJC7									YES	1	Q99615	DNAJC7
1962200	2365100	1851500	2296400		2233400	3860800	3336500	3560400	20.904	21.1735	20.8203	21.1309		21.0908	21.8805	21.6699	21.7636	3	2	3	P50570	DNM2	X										P50570	DNM2
5979700	6087600	4783800	5396500	4982900	5637800	4501500	5059800	5891300	22.5116	22.5374	22.1897	22.3636	22.2486	22.4267	22.102	22.2706	22.4902	3	3	3	P26358	DNMT1									YES	1	P26358	DNMT1
7391700	6181300	12424000	6376400	6957200	5250600	12547000	13254000	16735000	22.8175	22.5595	23.5666	22.6043	22.7301	22.3241	23.5808	23.6599	23.9964	3	3	3	Q92608	DOCK2	X										Q92608	DOCK2
3417600	5570700	6544000	5882300	3166500	4366700	6424000	7336000	6396100	21.7046	22.4094	22.6417	22.4879	21.5945	22.0581	22.615	22.8066	22.6088	3	3	3	G3V1D3	DPP3											G3V1D3	DPP3
11275000	11869000	11487000	11551000	11360000	10468000	12336000	12517000	12554000	23.4266	23.5007	23.4535	23.4615	23.4375	23.3195	23.5564	23.5774	23.5816	3	3	3	Q16555	DPYSL2									YES	1	Q16555	DPYSL2
6338000	3995300	7320300	5730800	5340100	5528300	9270300	8917200	8662300	22.5956	21.9299	22.8035	22.4503	22.3484	22.3984	23.1442	23.0882	23.0463	3	3	3	Q9Y295	DRG1									YES	1	Q9Y295	DRG1
34144000	22329000	23683000	25036000	36303000	20688000	17703000	17413000	14729000	25.0251	24.4124	24.4973	24.5775	25.1136	24.3023	24.0775	24.0537	23.8122	3	3	3	Q08554	DSC1											Q08554	DSC1
143480000	132360000	110780000	161580000	195200000	121490000	90594000	109830000	74969000	27.0963	26.9799	26.7231	27.2677	27.5404	26.8563	26.4329	26.7107	26.1598	3	3	3	Q02413	DSG1											Q02413	DSG1
172980000	233200000	114890000	142870000	199600000	112090000	127950000	243970000	41478000	27.366	27.797	26.7757	27.0901	27.5725	26.7401	26.931	27.8621	25.3058	3	3	3	P15924	DSP					YES	YES			YES	3	P15924	DSP
7898100	8845200	9149900	10369000	6040700	7142800	12742000	12238000	12763000	22.9131	23.0765	23.1253	23.3058	22.5263	22.7681	23.6031	23.5449	23.6055	3	3	3	Q14204	DYNC1H1	X	YES			YES				YES	3	Q14204	DYNC1H1
11778000	16282000	17542000	12617000	9952600	13645000	13788000	13840000	16319000	23.4896	23.9568	24.0643	23.5889	23.2466	23.7019	23.7169	23.7223	23.96	3	3	3	Q13011	ECH1											Q13011	ECH1
4888600	5524100	8184100	6840600	4896100	6960300	9231200	7880800	9192900	22.221	22.3973	22.9644	22.7057	22.2232	22.7307	23.1381	22.9099	23.1321	3	3	3	Q6P2E9	EDC4			YES						YES	2	Q6P2E9	EDC4
424570000	497930000	483840000	511320000	366790000	433470000	658610000	728010000	732600000	28.6614	28.8914	28.85	28.9297	28.4504	28.6914	29.2948	29.4394	29.4485	3	3	3	Q5VTE0	EEF1A1P5	X										Q5VTE0	EEF1A1P5		EEF1A1	EEF1A1
1777800	1807900	4849700	1742600		1244300	2255700	2490900	2123700	20.7617	20.7859	22.2095	20.7328		20.2469	21.1051	21.2482	21.0181	3	2	3	P24534	EEF1B2									YES	1	P24534	EEF1B2
8819700	16658000	27329000	16881000	11660000	14568000	18142000	16517000	17740000	23.0723	23.9897	24.7039	24.0089	23.4751	23.7963	24.1128	23.9774	24.0805	3	3	3	E9PK01	EEF1D											E9PK01	EEF1D
65279000	67269000	94481000	72410000	53002000	62092000	81948000	75526000	91853000	25.9601	26.0034	26.4935	26.1097	25.6595	25.8879	26.2882	26.1705	26.4528	3	3	3	P26641	EEF1G						YES			YES	2	P26641	EEF1G
155900000	153060000	200340000	174670000	132240000	154030000	242950000	229410000	250900000	27.216	27.1895	27.5779	27.3801	26.9786	27.1986	27.8561	27.7734	27.9025	3	3	3	P13639	EEF2		YES	YES		YES	YES			YES	5	P13639	EEF2
20651000	19381000	26179000	23151000	19897000	22150000	25050000	25885000	28789000	24.2997	24.2081	24.6419	24.4646	24.246	24.4008	24.5783	24.6256	24.779	3	3	3	Q15029	EFTUD2		YES	YES		YES				YES	4	Q15029	EFTUD2
4546900	7158200	4660200	3390400	5209500	5247400	5383500	5145300	5792000	22.1165	22.7712	22.152	21.693	22.3127	22.3232	22.3601	22.2948	22.4656	3	3	3	F8WAE5	EIF2A											F8WAE5	EIF2A
8908600	5284300	9704400	10237000	8235200	8839200	9269200	9365700	8866400	23.0868	22.3333	23.2102	23.2873	22.9734	23.0755	23.144	23.159	23.0799	3	3	3	P05198	EIF2S1		YES	YES		YES				YES	4	P05198	EIF2S1	YES
2310000	2542800	2060200	1890000	2784900	2573800	3764300	3126300	3859100	21.1395	21.278	20.9744	20.85	21.4092	21.2955	21.844	21.576	21.8798	3	3	3	P20042	EIF2S2		YES	YES		YES	YES			YES	5	P20042	EIF2S2
59579000	55068000	34080000	57183000	59832000	59737000	42492000	53897000	57653000	25.8283	25.7147	25.0224	25.7691	25.8344	25.8321	25.3407	25.6837	25.7809	3	3	3	P41091	EIF2S3									YES	1	P41091	EIF2S3	YES
82751000	66060000	66850000	86053000	96677000	91724000	97461000	91181000	109670000	26.3023	25.9773	25.9944	26.3587	26.5267	26.4508	26.5383	26.4422	26.7086	3	3	3	Q14152	EIF3A		YES	YES		YES				YES	4	Q14152	EIF3A
10731000	10207000	10292000	12312000	9343100	14507000	17244000	17862000	22851000	23.3553	23.2831	23.295	23.5536	23.1555	23.7902	24.0396	24.0904	24.4458	3	3	3	Q99613	EIF3C	X	YES			YES					2	Q99613	EIF3C
11743000	10497000	5272500	10820000	8756000	7996800	10784000	13161000	13796000	23.4853	23.3235	22.3301	23.3672	23.0618	22.931	23.3624	23.6498	23.7177	3	3	3	P60228	EIF3E		YES	YES						YES	3	P60228	EIF3E
8627200	5806900	5561900	7705500	10238000	9701300	9523000	7973200	10705000	23.0405	22.4693	22.4071	22.8775	23.2874	23.2097	23.183	22.9267	23.3518	3	3	3	O00303	EIF3F											O00303	EIF3F
1957700	1839200	2216900	2053300	2145100	5540700	1856200	3066200	4054100	20.9007	20.8106	21.0801	20.9695	21.0326	22.4016	20.8239	21.548	21.951	3	3	3	B3KS98	EIF3H			YES		YES					2	B3KS98	EIF3H
3546200	4540500	6276000	3672500		5101600	5821800	6942400	8854800	21.7578	22.1144	22.5814	21.8083		22.2825	22.473	22.727	23.078	3	2	3	B0QY89	EIF3L		YES	YES		YES					3	B0QY89	EIF3L
38188000	53541000	58931000	51848000	44095000	44672000	71229000	62728000	65783000	25.1866	25.6741	25.8125	25.6278	25.3941	25.4129	26.086	25.9026	25.9712	3	3	3	P60842	EIF4A1		YES	YES		YES	YES			YES	5	P60842	EIF4A1		YES
10597000	9928700	10617000	13542000	8030900	12461000	10543000	11667000	12833000	23.3372	23.2432	23.3399	23.6909	22.9371	23.5709	23.3298	23.4759	23.6134	3	3	3	P38919	EIF4A3		YES	YES		YES				YES	4	P38919	EIF4A3
11023000	7695200	8111100	12033000	11649000	11151000	11240000	11309000	12596000	23.394	22.8755	22.9515	23.5205	23.4737	23.4107	23.4221	23.431	23.5865	3	3	3	E7EX73	EIF4G1		YES	YES		YES	YES				4	E7EX73	EIF4G1
3533500	3162900	5038400	3822500	3789100	4889100	6779500	6986000	6510800	21.7527	21.5928	22.2645	21.8661	21.8534	22.2211	22.6927	22.736	22.6344	3	3	3	H0Y3P2	EIF4G2	X	YES	YES		YES	YES				4	H0Y3P2	EIF4G2
1825600	2868300	5993600	2621000	2133100	3124500	2686200	3393300	3650600	20.7999	21.4518	22.515	21.3217	21.0245	21.5752	21.3571	21.6943	21.7997	3	3	3	Q15056	EIF4H		YES	YES		YES	YES	YES	YES	YES	7	Q15056	EIF4H
3733100	4051000	17199000	2343400		4686500	6132000	6309400	3857700	21.8319	21.9498	24.0358	21.1602		22.1601	22.5479	22.5891	21.8793	3	2	3	I3L397	EIF5A		YES								1	I3L397	EIF5A
6057300	6142000	4154400	10365000	11905000	7037100	6744900	6016200	6377400	22.5302	22.5503	21.9862	23.3052	23.5051	22.7465	22.6854	22.5204	22.6045	3	3	3	A0A087WUT6	EIF5B		YES	YES		YES	YES				4	A0A087WUT6	EIF5B
22688000	26895000	27044000	27479000	34746000	34064000	25771000	26197000	24254000	24.4354	24.6808	24.6888	24.7118	25.0503	25.0217	24.6192	24.6429	24.5317	3	3	3	Q15717	ELAVL1		YES	YES	YES	YES	YES	YES	YES	YES	8	Q15717	ELAVL1
2673100	2636200	5847000	3439600	2762500	4137100	6320000	5596900	6311400	21.3501	21.33	22.4793	21.7138	21.3975	21.9802	22.5915	22.4162	22.5895	3	3	3	Q92556	ELMO1											Q92556	ELMO1
3957800	4668500	1429900	3599500	3857200	3190900	4289100	4874500	6060400	21.9163	22.1545	20.4475	21.7794	21.8791	21.6055	22.0322	22.2168	22.531	3	3	3	Q8N766	EMC1											Q8N766	EMC1
5243600	4066300	4950700	5387800	4816600		7440900	6381900	5212600	22.3221	21.9553	22.2392	22.3613	22.1996		22.827	22.6056	22.3136	3	2	3	Q92979	EMG1		YES	YES		YES					3	Q92979	EMG1
233920000	270900000	347420000	292160000	192220000	261310000	400840000	367460000	387850000	27.8014	28.0132	28.3721	28.1222	27.5182	27.9612	28.5785	28.453	28.5309	3	3	3	P06733	ENO1			YES		YES	YES			YES	4	P06733	ENO1
16615000	18417000	21348000	20323000	18237000	18701000	29049000	28592000	30394000	23.986	24.1345	24.3476	24.2766	24.1204	24.1566	24.792	24.7691	24.8573	3	3	3	P07814	EPRS	X					YES			YES	2	P07814	EPRS	YES
7941900		4754900	8178700	6649200	6535200	7718400	7027100	6417900	22.9211		22.181	22.9634	22.6647	22.6398	22.8799	22.7445	22.6137	2	3	3	Q9NZ08	ERAP1											Q9NZ08	ERAP1
	3214700	5051900	2868300	2419700	2621200	4666700	5313300	5008100		21.6163	22.2684	21.4518	21.2064	21.3218	22.154	22.3412	22.2558	2	3	3	Q969X5	ERGIC1											Q969X5	ERGIC1
11761000	13579000	16281000	15555000	15355000	13974000	11589000	13967000	13425000	23.4875	23.6949	23.9567	23.8909	23.8722	23.7362	23.4663	23.7355	23.6784	3	3	3	G3V279	ERH		YES								1	G3V279	ERH
2310800	2069000	2645900	3705600		4375000	2265300	2771200	3028800	21.14	20.9805	21.3353	21.8213		22.0609	21.1113	21.4021	21.5303	3	2	3	O75477	ERLIN1											O75477	ERLIN1
5245700	4692000	7155100	6579400	4092000	5563900	6448500	5195700	8587900	22.3227	22.1618	22.7705	22.6495	21.9644	22.4077	22.6205	22.3089	23.0339	3	3	3	Q96HE7	ERO1L											Q96HE7	ERO1L
8538900	16053000	19764000	16042000	13630000	14086000	16223000	12172000	15091000	23.0256	23.9363	24.2364	23.9354	23.7003	23.7478	23.9515	23.5371	23.8472	3	3	3	P30040	ERP29						YES				1	P30040	ERP29
9291800	6216200	11216000	5912900		4977000	5889700	5868900	6787600	23.1475	22.5676	23.4191	22.4954		22.2468	22.4898	22.4847	22.6945	3	2	3	P10768	ESD											P10768	ESD
13535000	13724000	19360000	13603000	6213700	10895000	19029000	20454000	22682000	23.6902	23.7102	24.2066	23.6974	22.567	23.3772	24.1817	24.2859	24.435	3	3	3	Q9BSJ8	ESYT1									YES	1	Q9BSJ8	ESYT1
5637400	6181600	9210400	7472200	7698500	7646300	10736000	10100000	10467000	22.4266	22.5595	23.1348	22.8331	22.8761	22.8663	23.356	23.2679	23.3193	3	3	3	H7BXI1	ESYT2											H7BXI1	ESYT2
21144000	22575000	14323000	12250000	9335700	12329000	10127000	10994000	11766000	24.3337	24.4282	23.7718	23.5463	23.1543	23.5556	23.2717	23.3902	23.4881	3	3	3	P13804	ETFA									YES	1	P13804	ETFA
40896000	49025000	29018000	27850000	20139000	25540000	17116000	17601000	19184000	25.2855	25.547	24.7904	24.7312	24.2635	24.6063	24.0288	24.0692	24.1934	3	3	3	P38117	ETFB	X										P38117	ETFB
3465600	7423700	3128400	2467600	1921100	2244600	2031100	2131800		21.7247	22.8237	21.577	21.2347	20.8735	21.098	20.9538	21.0236		3	3	2	M0QXB5	ETHE1											M0QXB5	ETHE1
3664400	3953900	2570900	3932900	5150800	4961800	2468800	3096200	3772500	21.8051	21.9148	21.2938	21.9072	22.2964	22.2424	21.2354	21.5621	21.8471	3	3	3	B0QYK0	EWSR1		YES	YES		YES	YES	YES	YES		6	B0QYK0	EWSR1
2512400	2583200	5625800	2341700		2776200	3305500	10148000	1999300	21.2606	21.3007	22.4236	21.1591		21.4047	21.6564	23.2747	20.9311	3	2	3	Q01469	FABP5									YES	1	Q01469	FABP5
1675600	5031100	3806100		3374800	3041500	2968600	3003500	4434400	20.6762	22.2624	21.8599		21.6864	21.5364	21.5014	21.5182	22.0803	3	2	3	O95864	FADS2			YES						YES	2	O95864	FADS2
3417900	1137900	3085000	1499900		2869200	3646200	2650800	3837500	21.7047	20.1179	21.5568	20.5164		21.4522	21.798	21.338	21.8717	3	2	3	Q96CS3	FAF2											Q96CS3	FAF2
138350000	140990000	136960000	114180000	177680000	152080000	11806000	12735000	14223000	27.0437	27.071	27.0292	26.7667	27.4047	27.1803	23.493	23.6023	23.7617	3	3	3	Q9NZB2	FAM120A	X	YES	YES		YES	YES		YES	YES	6	Q9NZB2	FAM120A
4891600	3253900	2766300	11133000	18181000	11021000	948740		1152300	22.2219	21.6337	21.3995	23.4083	24.1159	23.3938	19.8557		20.1361	3	3	2	G3XAI9	FAM133B	X	YES								1	G3XAI9	FAM133B
3761700	3672900	2978300	4072300	3483100	4007400	5514100	5282500	4836000	21.843	21.8085	21.5061	21.9574	21.7319	21.9342	22.3947	22.3328	22.2054	3	3	3	Q9NUQ9	FAM49B									YES	1	Q9NUQ9	FAM49B
2300900		3736300	2221400	2363900	2102000	3175200	4204200	2299100	21.1338		21.8332	21.083	21.1727	21.0033	21.5984	22.0034	21.1326	2	3	3	Q52LJ0	FAM98B		YES							YES	2	Q52LJ0	FAM98B
5358800	7560300	9055300	5883000	3631700	8052000	10274000	8403800	11339000	22.3535	22.85	23.1103	22.4881	21.7922	22.9409	23.2925	23.0026	23.4348	3	3	3	Q9NSD9	FARSB			YES			YES			YES	3	Q9NSD9	FARSB
25173000	18766000	28773000	24796000	19511000	33530000	36514000	37597000	41101000	24.5854	24.1616	24.7782	24.5636	24.2178	24.9989	25.1219	25.1641	25.2927	3	3	3	A0A0U1RQF0	FASN		YES	YES		YES					3	A0A0U1RQF0	FASN
20530000	17533000	10325000	15615000	12128000	13351000	12920000	15186000	14454000	24.2912	24.0636	23.2996	23.8964	23.5318	23.6704	23.6231	23.8562	23.785	3	3	3	E9PR30	FAU		YES	YES							2	E9PR30	FAU
24528000	25228000	25285000	23057000	24355000	24155000	25470000	22145000	26754000	24.5479	24.5885	24.5918	24.4587	24.5377	24.5258	24.6023	24.4005	24.6733	3	3	3	M0R299	FBL		YES	YES		YES		YES	YES		5	M0R299	FBL
8347300	5525800	10394000	7072700	7961900	5626300	9310000	8526600	9528700	22.9929	22.3978	23.3092	22.7538	22.9247	22.4238	23.1503	23.0235	23.1838	3	3	3	P37268	FDFT1											P37268	FDFT1
9040700	7347300	10389000	10883000	5801300	7874400	10138000	10204000	9666100	23.108	22.8088	23.3086	23.3756	22.4679	22.9087	23.2733	23.2826	23.2045	3	3	3	P14324	FDPS					YES				YES	2	P14324	FDPS
4474400	4193100	1825600	1612200	1490600	1517200		1425900	1217100	22.0933	21.9996	20.7999	20.6206	20.5075	20.533		20.4434	20.215	3	3	2	A0A0A0MTN9	FDXR											A0A0A0MTN9	FDXR
9750600	9048600	8611200	11409000	7780300	9731000	10412000	12340000	11728000	23.2171	23.1093	23.0378	23.4437	22.8914	23.2142	23.3117	23.5568	23.4835	3	3	3	P39748	FEN1			YES							1	P39748	FEN1
15332000	18730000	14837000	17783000	18697000	18874000	21166000	17829000	19780000	23.87	24.1588	23.8227	24.084	24.1563	24.1699	24.3352	24.0877	24.2375	3	3	3	Q86UX7	FERMT3											Q86UX7	FERMT3
15346000	16678000	15436000	15191000	10768000	15821000	19544000	16582000	18888000	23.8714	23.9914	23.8798	23.8567	23.3602	23.9153	24.2202	23.9831	24.171	3	3	3	P07954	FH									YES	1	P07954	FH
1976100	3453000		3043300	2635700	4288900	3133000	3760700	3974600	20.9142	21.7194		21.5372	21.3298	22.0322	21.5791	21.8426	21.9224	2	3	3	Q6UN15	FIP1L1		YES	YES		YES			YES	YES	5	Q6UN15	FIP1L1
6966900	6318800	13216000	6162400	5988500	9462900	9369400	10475000	10209000	22.7321	22.5912	23.6558	22.5551	22.5138	23.1739	23.1595	23.3204	23.2833	3	3	3	Q02790	FKBP4					YES				YES	2	Q02790	FKBP4
3188300	3850600	8542000	5338500	2628500	4236400	5844500	5332100	6589000	21.6044	21.8767	23.0261	22.348	21.3258	22.0144	22.4786	22.3463	22.6516	3	3	3	Q14318	FKBP8									YES	1	Q14318	FKBP8
2586300	2124900	1880500	2017100		2363000	2263400	2410800	2881900	21.3025	21.019	20.8427	20.9439		21.1722	21.1101	21.2011	21.4586	3	2	3	Q13045	FLII									YES	1	Q13045	FLII
127740000	122170000	133170000	146630000	127120000	144930000	149880000	159180000	180840000	26.9286	26.8643	26.9887	27.1276	26.9216	27.1108	27.1592	27.2461	27.4301	3	3	3	Q60FE5	FLNA		YES	YES		YES	YES				4	Q60FE5	FLNA
23106000	19545000	20398000	21369000	21540000	24257000	23841000	28127000	29290000	24.4618	24.2203	24.2819	24.349	24.3605	24.5319	24.5069	24.7455	24.8039	3	3	3	O75369	FLNB		YES	YES			YES			YES	4	O75369	FLNB	YES
3579600	4172500	2753000	2621900		1782900	2920900	3039200	2753300	21.7714	21.9925	21.3926	21.3222		20.7658	21.478	21.5353	21.3927	3	2	3	Q8IY81	FTSJ3		YES	YES		YES		YES	YES	YES	6	Q8IY81	FTSJ3
19432000	16677000	13645000	15319000	18435000	23391000	14333000	16398000	17469000	24.2119	23.9914	23.7019	23.8688	24.1359	24.4795	23.7728	23.967	24.0583	3	3	3	E9PEB5	FUBP1		YES	YES		YES	YES	YES	YES		6	E9PEB5	FUBP1
4211200	4106100	4270700	5989700	4552200	8273600	3277600	2964200	3739900	22.0058	21.9693	22.026	22.5141	22.1181	22.9801	21.6442	21.4992	21.8346	3	3	3	Q96I24	FUBP3		YES	YES		YES	YES	YES	YES	YES	7	Q96I24	FUBP3
13300000	13273000	14670000	16267000	24701000	19426000	9647100	7420400	9977900	23.6649	23.662	23.8064	23.9554	24.5581	24.2115	23.2017	22.8231	23.2503	3	3	3	H3BPE7	FUS		YES	YES	YES	YES	YES	YES	YES		7	H3BPE7	FUS		YES
15482000	15534000	15093000	8919500	11921000	12872000	4660800	4206900	4839300	23.8841	23.8889	23.8474	23.0885	23.507	23.6177	22.1521	22.0043	22.2064	3	3	3	P51114	FXR1	X	YES	YES		YES	YES		YES	YES	6	P51114	FXR1
27109000	21970000	19964000	22821000	35582000	28296000	7891600	7214400	9274900	24.6923	24.389	24.2509	24.4439	25.0846	24.7541	22.9119	22.7824	23.1449	3	3	3	Q13283	G3BP1	X	YES	YES		YES	YES		YES	YES	6	Q13283	G3BP1
2254900	2146300	3949800	2651200	2642300	3719200	3595200	2599400	4700000	21.1046	21.0334	21.9133	21.3382	21.3334	21.8266	21.7776	21.3097	22.1642	3	3	3	Q9UN86	G3BP2		YES	YES		YES			YES	YES	5	Q9UN86	G3BP2
3161600	5600300	7426600	4330800	5457600	4275300	7345800	8745200	8540200	21.5922	22.4171	22.8243	22.0462	22.3798	22.0276	22.8085	23.0601	23.0258	3	3	3	P11413	G6PD									YES	1	P11413	G6PD
10262000	49742000	29561000	12887000	10834000	22282000	4213100	2533900	2478800	23.2908	25.568	24.8172	23.6194	23.3691	24.4094	22.0065	21.2729	21.2412	3	3	3	P04591	Gag	X										P04591	Gag
965020000	943270000	775600000	577380000	853180000	788730000	144550000	133490000	127730000	29.846	29.8131	29.5307	29.1049	29.6683	29.555	27.107	26.9922	26.9285	3	3	3	P04585	Gag-Pol	X										P04585	Gag-Pol
2853600	3162200	4258600	2378100		2953600	5409300	5852200	6071200	21.4444	21.5925	22.0219	21.1814		21.494	22.367	22.4805	22.5336	3	2	3	Q10471	GALNT2	X								YES	1	Q10471	GALNT2
20284000	18743000	22792000	25841000	18088000	22802000	31332000	29794000	30810000	24.2738	24.1598	24.442	24.6232	24.1085	24.4427	24.9011	24.8285	24.8769	3	3	3	Q14697	GANAB	X		YES		YES					2	Q14697	GANAB
397640000	385670000	509660000	485560000	565700000	509820000	413800000	456540000	462980000	28.5669	28.5228	28.925	28.8551	29.0755	28.9254	28.6244	28.7662	28.7864	3	3	3	P04406	GAPDH									YES	1	P04406	GAPDH		YES
7214400	7380100	6246800	6084800	6315200	6600300	7564100	5927300	7777300	22.7824	22.8152	22.5747	22.5368	22.5904	22.6541	22.8507	22.4989	22.8908	3	3	3	P41250	GARS									YES	1	P41250	GARS
13875000	13842000	14928000	17978000	10980000	14814000	19271000	18556000	22671000	23.726	23.7225	23.8315	24.0997	23.3884	23.8205	24.1999	24.1454	24.4343	3	3	3	P22102	GART									YES	1	P22102	GART
3009500	3398300	3838000	2905800		3884300	4769800	4155400	4766600	21.5211	21.6964	21.8719	21.4705		21.8892	22.1855	21.9866	22.1845	3	2	3	Q86YP4	GATAD2A									YES	1	Q86YP4	GATAD2A
6635100	5313800	6426400	2709900	2547400	3947300	2986500	3176200	3693500	22.6617	22.3413	22.6156	21.3698	21.2806	21.9124	21.51	21.5989	21.8166	3	3	3	O75323	GBAS	X										O75323	GBAS
15813000	17937000	15267000	21700000	14930000	18216000	25743000	21830000	26815000	23.9146	24.0964	23.8639	24.3712	23.8317	24.1187	24.6177	24.3798	24.6765	3	3	3	P50395	GDI2		YES							YES	2	P50395	GDI2
15798000	10733000	6262200	6706100	7393600	6601500		2670900	5184000	23.9132	23.3556	22.5782	22.677	22.8178	22.6544		21.3489	22.3056	3	3	2	F8WAU4	GFM1					YES					1	F8WAU4	GFM1
2848900	4931000	3429600	4941700	2582200	4417000	6035000	4453100	6888000	21.442	22.2334	21.7096	22.2366	21.3002	22.0746	22.5249	22.0864	22.7157	3	3	3	Q06210	GFPT1									YES	1	Q06210	GFPT1
9026600	8754400	8352900	15842000	15480000	8997100	3741500	3362000	5856900	23.1058	23.0616	22.9938	23.9173	23.8839	23.101	21.8352	21.6809	22.4817	3	3	3	O75223	GGCT	X		YES							1	O75223	GGCT
1294700	2587100	5261200	2699900	2055300	1913400	4235700	3660700	3986500	20.3042	21.3029	22.327	21.3645	20.9709	20.8677	22.0142	21.8037	21.9267	3	3	3	O76003	GLRX3					YES				YES	2	O76003	GLRX3
20432000	20578000	12747000	10740000	12015000	13264000	11326000	14705000	13159000	24.2843	24.2946	23.6037	23.3565	23.5183	23.661	23.4331	23.8098	23.6495	3	3	3	O94925	GLS									YES	1	O94925	GLS
19550000	23258000	28381000	21892000	16323000	16739000	21581000	25119000	24530000	24.2207	24.4712	24.7584	24.3839	23.9604	23.9967	24.3633	24.5823	24.548	3	3	3	P00367	GLUD1											P00367	GLUD1
7496400	6158400	9667500	6450900	5003600	6877000	5177200	6229300	6167200	22.8378	22.5541	23.2047	22.6211	22.2545	22.7133	22.3037	22.5706	22.5562	3	3	3	O60234	GMFG											O60234	GMFG
4140300	4317400	6279500	4802900	2615600	3472200	9360200	7899800	6118000	21.9813	22.0417	22.5822	22.1955	21.3187	21.7274	23.1581	22.9134	22.5446	3	3	3	P49915	GMPS									YES	1	P49915	GMPS
28844000	31817000	14987000	31101000	19852000	27155000	40294000	34596000	34787000	24.7818	24.9233	23.8372	24.8905	24.2428	24.6947	25.2641	25.0441	25.052	3	3	3	P04899	GNAI2									YES	1	P04899	GNAI2
1901400	1508500	1286200	2118300	1934600	960210	1879100	3281600	2634500	20.8586	20.5247	20.2947	21.0145	20.8836	19.873	20.8416	21.646	21.3291	3	3	3	P50148	GNAQ											P50148	GNAQ
5719000	4460000	4556400	4402800	5329100	6050600	5816800	8503300	7091800	22.4473	22.0886	22.1195	22.07	22.3455	22.5286	22.4718	23.0196	22.7577	3	3	3	P63092	GNAS											P63092	GNAS
7168800	10119000	17986000	7908000	5123600	7907400	9815500	12556000	10596000	22.7733	23.2706	24.1004	22.9149	22.2887	22.9148	23.2266	23.5819	23.337	3	3	3	P62873	GNB1									YES	1	P62873	GNB1
30899000	36650000	36529000	38977000	42021000	38271000	44295000	40864000	40649000	24.8811	25.1273	25.1225	25.2161	25.3246	25.1897	25.4006	25.2843	25.2767	3	3	3	P63244	GNB2L1									YES	1	P63244	GNB2L1
2879100	3239400	1796000	1918700	1975500		2231500	2110700	2404000	21.4572	21.6273	20.7764	20.8717	20.9138		21.0896	21.0093	21.197	3	2	3	Q9BVP2	GNL3		YES			YES		YES	YES	YES	5	Q9BVP2	GNL3
11061000	9318200	5747500	12262000	11010000	11253000	14049000	13765000	15211000	23.399	23.1516	22.4545	23.5477	23.3923	23.4238	23.744	23.7145	23.8586	3	3	3	P00505	GOT2		YES							YES	2	P00505	GOT2
13928000	11718000	15199000	14551000	11183000	11974000	15507000	13766000	18795000	23.7315	23.4822	23.8575	23.7946	23.4148	23.5134	23.8864	23.7146	24.1638	3	3	3	K7EQ48	GPI											K7EQ48	GPI
2876900	4379500	5797600	2338100		1702600	3925700	2991200	5002900	21.4561	22.0623	22.467	21.1569		20.6993	21.9045	21.5123	22.2543	3	2	3	U3KQ56	GRHPR	X										U3KQ56	GRHPR
18281000	10763000	12391000	10888000	20019000	15643000	4274900	3629100	3925300	24.1238	23.3596	23.5628	23.3762	24.2549	23.899	22.0275	21.7912	21.9044	3	3	3	F5H5I6	GRSF1	X	YES	YES		YES	YES	YES	YES		6	F5H5I6	GRSF1	YES
30582000	24474000	19084000	25173000	28811000	19793000	10217000	13072000	15395000	24.8662	24.5447	24.1859	24.5854	24.7801	24.2385	23.2845	23.64	23.876	3	3	3	Q96QA5	GSDMA	X										Q96QA5	GSDMA
	3816800	7249900	5457000	3726200	5553100	5842700	7382500	5577500		21.8639	22.7895	22.3797	21.8293	22.4049	22.4782	22.8157	22.4112	2	3	3	P78417	GSTO1									YES	1	P78417	GSTO1
30291000	41128000	74827000	44161000	23902000	37143000	49239000	42102000	41083000	24.8524	25.2936	26.1571	25.3963	24.5106	25.1466	25.5533	25.3274	25.292	3	3	3	P09211	GSTP1			YES							1	P09211	GSTP1
4531700	3617800	2888800	4401100	3754400	4741700	4800400	6399300	5189100	22.1116	21.7867	21.462	22.0694	21.8402	22.177	22.1947	22.6095	22.3071	3	3	3	Q9BZE4	GTPBP4		YES	YES		YES	YES	YES	YES	YES	7	Q9BZE4	GTPBP4
14914000	12609000	6007100	7573200	15157000	8107900	4293200	3376500	2694300	23.8302	23.588	22.5182	22.8525	23.8535	22.9509	22.0336	21.6871	21.3615	3	3	3	P07305	H1F0	X	YES			YES	YES				3	P07305	H1F0
27482000	34926000	13449000	11010000	15894000	18344000	16922000	18474000	21322000	24.712	25.0578	23.681	23.3923	23.922	24.1288	24.0124	24.139	24.3458	3	3	3	Q92522	H1FX		YES								1	Q92522	H1FX	YES	YES
10341000	18152000	12752000	13258000	6065100	7217800	13235000	13273000	16028000	23.3019	24.1136	23.6042	23.6604	22.5321	22.7831	23.6579	23.662	23.9341	3	3	3	Q71UI9	H2AFV											Q71UI9	H2AFV
143660000	184410000	108500000	99951000	100890000	111440000	116130000	118260000	121650000	27.0981	27.4583	26.6931	26.5747	26.5882	26.7317	26.7912	26.8174	26.8582	3	3	3	O75367	H2AFY						YES			YES	2	O75367	H2AFY
4439300	4306700	2003400	2515300	4853000	2583000	2282900	2226700	2669000	22.0819	22.0382	20.934	21.2623	22.2104	21.3006	21.1224	21.0865	21.3479	3	3	3	H3BS72	HACD3											H3BS72	HACD3
5738100	3948500	5019600		3687400	3055000	5688700	6195300	3811300	22.4521	21.9129	22.2591		21.8142	21.5427	22.4397	22.5627	21.8619	3	2	3	E9PF18	HADH						YES				1	E9PF18	HADH
74058000	71886000	55242000	43662000	41480000	42238000	38424000	37527000	36763000	26.1422	26.0992	25.7193	25.3799	25.3059	25.332	25.1955	25.1614	25.1318	3	3	3	P40939	HADHA	X								YES	1	P40939	HADHA
18939000	16477000	11072000	13185000	8288500	9842100	8459100	9304500	7254300	24.1749	23.974	23.4004	23.6524	22.9827	23.2305	23.0121	23.1495	22.7904	3	3	3	P55084	HADHB					YES				YES	2	P55084	HADHB
7445600	4309400	5259700	6776000	7393300	6704200	3738900	2754000	3012000	22.828	22.0391	22.3265	22.692	22.8178	22.6766	21.8342	21.3931	21.5223	3	3	3	P42357	HAL	X										P42357	HAL
6299000	6596500	4807000	4486400	4341600	4679400	4414900	5163000	5482600	22.5867	22.6533	22.1967	22.0971	22.0498	22.1579	22.0739	22.2998	22.3864	3	3	3	SYH_HUMAN	HARS											SYH_HUMAN	HARS
3412000	3966100	4741300	4646000	4494200	5081800	7377000	8271700	7810100	21.7022	21.9193	22.1769	22.1476	22.0996	22.2769	22.8146	22.9798	22.8969	3	3	3	O14929	HAT1	X								YES	1	O14929	HAT1
12586000	13504000	12392000	15336000	12297000	14862000	14217000	13603000	15433000	23.5853	23.6869	23.5629	23.8704	23.5518	23.8251	23.7611	23.6974	23.8795	3	3	3	A6NEM2	HCFC1											A6NEM2	HCFC1
3350700	5667800	4893900	4013000		6843000	6764500	8254100	6551800	21.676	22.4344	22.2226	21.9362		22.7062	22.6896	22.9767	22.6435	3	2	3	Q13547	HDAC1									YES	1	Q13547	HDAC1
2645600	2072700	2406600	2455000	2070400	2690100	2596800	1834600	2200200	21.3352	20.9831	21.1986	21.2273	20.9815	21.3592	21.3083	20.807	21.0692	3	3	3	A0A024R4E5	HDLBP		YES	YES		YES	YES		YES		5	A0A024R4E5	HDLBP	YES
1274100000	1056400000	699330000	1395400000	2173700000	1572600000	640350000	614460000	701780000	30.2468	29.9765	29.3814	30.378	31.0175	30.5505	29.2543	29.1947	29.3864	3	3	3	P16401	HIST1H1B	X				YES	YES	YES	YES		4	P16401	HIST1H1B
601750000	249230000	83500000	295750000	655200000	283930000	140980000	126330000	118890000	29.1646	27.8929	26.3153	28.1398	29.2874	28.081	27.0709	26.9126	26.8251	3	3	3	P16403	HIST1H1C	X	YES			YES	YES	YES		YES	5	P16403	HIST1H1C	YES
2427200000	1802000000	1712200000	2604100000	3976200000	2986000000	916180000	901280000	1045600000	31.1766	30.747	30.6732	31.2781	31.8887	31.4756	29.7711	29.7474	29.9617	3	3	3	P16402	HIST1H1D	X	YES						YES		2	P16402	HIST1H1D
1373100000	727570000	604470000	1168500000	1764000000	1434000000	262540000	287390000	402910000	30.3548	29.4385	29.1711	30.122	30.7162	30.4174	27.968	28.0984	28.5859	3	3	3	P10412	HIST1H1E	X	YES				YES	YES	YES	YES	5	P10412	HIST1H1E
18257000	40547000	29705000	30154000	9335000	18344000	44253000	36464000	37350000	24.1219	25.2731	24.8242	24.8458	23.1542	24.1288	25.3993	25.12	25.1546	3	3	3	Q93077	HIST1H2AC											Q93077	HIST1H2AC
1155600000	1475600000	1078700000	1402600000	521770000	1170400000	1407800000	1523100000	1321300000	30.106	30.4587	30.0066	30.3855	28.9588	30.1244	30.3908	30.5044	30.2993	3	3	3	Q99878	HIST1H2AJ											Q99878	HIST1H2AJ
2022000000	2336500000	1890100000	1618000000	1110700000	1361400000	1746000000	1585400000	1624000000	30.9131	31.1217	30.8158	30.5916	30.0488	30.3424	30.7014	30.5622	30.5969	3	3	3	B2R4S9	HIST1H2BI											B2R4S9	HIST1H2BI
843890000	1084300000	757910000	604990000	581470000	630660000	810860000	825720000	838110000	29.6525	30.0141	29.4975	29.1723	29.1151	29.2323	29.5949	29.6211	29.6426	3	3	3	P68431	HIST1H3A											P68431	HIST1H3A
1655700000	2078600000	1648100000	1561600000	1068700000	1296400000	2581600000	2104400000	1952000000	30.6248	30.953	30.6182	30.5404	29.9932	30.2719	31.2656	30.9708	30.8623	3	3	3	P62805	HIST1H4A						YES			YES	2	P62805	HIST1H4A
165680000	143360000	143020000	161200000	122090000	175750000	121080000	126430000	124920000	27.3038	27.0951	27.0916	27.2643	26.8634	27.3889	26.8514	26.9138	26.8964	3	3	3	Q16778	HIST2H2BE											Q16778	HIST2H2BE	YES
56372000	74692000	52976000	66706000	43304000	45414000	71491000	63039000	72263000	25.7485	26.1545	25.6588	25.9913	25.368	25.4366	26.0913	25.9097	26.1068	3	3	3	Q5TEC6	HIST2H3PS2											Q5TEC6	HIST2H3PS2
5261600	5327300	11687000	8775400		5679900	12327000	12235000	11700000	22.3271	22.345	23.4784	23.065		22.4374	23.5553	23.5445	23.48	3	2	3	Q5SRN7	HLA-A					YES					1	Q5SRN7	HLA-A
1363200	1759000	2087600	1767800	1929800		3710900	3806100	2996400	20.3786	20.7463	20.9934	20.7535	20.88		21.8233	21.8599	21.5148	3	2	3	Q8TCT9	HM13	X										Q8TCT9	HM13
11870000	11059000	9489800	10663000	9452000	12537000	13527000	12112000	16375000	23.5008	23.3987	23.1779	23.3461	23.1722	23.5797	23.6893	23.5299	23.965	3	3	3	P17096	HMGA1						YES			YES	2	P17096	HMGA1
12881000	21137000	25130000	20196000	12585000	22105000	25067000	28399000	37521000	23.6187	24.3333	24.5829	24.2676	23.5852	24.3979	24.5793	24.7593	25.1612	3	3	3	P09429	HMGB1		YES	YES		YES	YES			YES	5	P09429	HMGB1
4546700	4984200	12529000	3310900	3173500		9067200	9460900	7608600	22.1164	22.2489	23.5788	21.6588	21.5976		23.1122	23.1735	22.8592	3	2	3	P26583	HMGB2	X	YES			YES	YES			YES	4	P26583	HMGB2
2742200	2020800	4099900	2205900	3362900	3544600	2048500	1483300	2228600	21.3869	20.9465	21.9672	21.0729	21.6813	21.7572	20.9661	20.5004	21.0877	3	3	3	Q13151	HNRNPA0		YES	YES		YES	YES	YES	YES	YES	7	Q13151	HNRNPA0
62564000	80923000	71358000	57839000	64442000	64954000	56762000	53356000	59836000	25.8988	26.27	26.0886	25.7855	25.9415	25.9529	25.7584	25.6691	25.8345	3	3	3	F8W6I7	HNRNPA1		YES		YES	YES	YES	YES	YES		6	F8W6I7	HNRNPA1	YES		YES
125780000	117220000	149230000	95003000	132360000	137290000	58561000	71345000	57181000	26.9063	26.8046	27.153	26.5015	26.9799	27.0327	25.8034	26.0883	25.769	3	3	3	P22626	HNRNPA2B1	X	YES	YES	YES	YES	YES	YES	YES	YES	8	P22626	HNRNPA2B1	YES		YES
25575000	26245000	28638000	25019000	32187000	30195000	17834000	14297000	15999000	24.6082	24.6455	24.7714	24.5765	24.94	24.8478	24.0881	23.7692	23.9315	3	3	3	P51991	HNRNPA3	X	YES	YES	YES	YES	YES	YES	YES	YES	8	P51991	HNRNPA3	YES	YES	YES
27404000	21269000	13521000	21441000	25540000	26611000	13142000	10075000	11574000	24.7079	24.3422	23.6887	24.3539	24.6063	24.6655	23.6477	23.2643	23.4644	3	3	3	D6R9P3	HNRNPAB		YES	YES	YES	YES	YES	YES	YES		7	D6R9P3	HNRNPAB	YES
51371000	54706000	49810000	56557000	53959000	61407000	45094000	37336000	39518000	25.6145	25.7052	25.5699	25.7532	25.6854	25.8719	25.4264	25.1541	25.236	3	3	3	G3V4W0	HNRNPC		YES	YES	YES	YES	YES	YES	YES		7	G3V4W0	HNRNPC
71172000	76747000	95116000	92556000	103450000	113440000	53496000	55777000	60046000	26.0848	26.1936	26.5032	26.4638	26.6244	26.7574	25.6729	25.7332	25.8396	3	3	3	H0YA96	HNRNPD		YES	YES	YES	YES	YES	YES	YES		7	H0YA96	HNRNPD	YES	YES	YES
4031200	3616900	2757700	3031000	3244600	2867900	2246500	2155300		21.9428	21.7863	21.395	21.5314	21.6296	21.4516	21.0992	21.0395		3	3	2	A0A087WUK2	HNRNPDL		YES	YES	YES	YES	YES	YES	YES		7	A0A087WUK2	HNRNPDL
22360000	19558000	24841000	17591000	21589000	18079000	14324000	13181000	16687000	24.4144	24.2213	24.5662	24.0683	24.3638	24.1078	23.7719	23.652	23.9922	3	3	3	P52597	HNRNPF		YES	YES		YES	YES	YES	YES	YES	7	P52597	HNRNPF	YES	YES
55955000	83500000	93537000	70201000	73301000	70065000	56194000	53536000	63654000	25.7378	26.3153	26.479	26.065	26.1273	26.0622	25.7439	25.674	25.9237	3	3	3	E9PCY7	HNRNPH1		YES	YES		YES	YES	YES	YES		6	E9PCY7	HNRNPH1	YES
14014000	21788000	23221000	22220000	16708000	16740000	12126000	11269000	13724000	23.7404	24.377	24.4689	24.4054	23.994	23.9968	23.5316	23.4259	23.7102	3	3	3	P31942	HNRNPH3		YES	YES		YES	YES	YES	YES	YES	7	P31942	HNRNPH3	YES		YES
166540000	163450000	177210000	152490000	188530000	184390000	118120000	118080000	118250000	27.3113	27.2843	27.4009	27.1841	27.4902	27.4582	26.8157	26.8152	26.8173	3	3	3	P61978	HNRNPK	X	YES	YES	YES	YES	YES	YES	YES	YES	8	P61978	HNRNPK	YES		YES
68801000	67628000	53078000	58475000	93525000	73838000	33436000	30601000	31188000	26.0359	26.0111	25.6616	25.8013	26.4788	26.1379	24.9949	24.8671	24.8945	3	3	3	P14866	HNRNPL	X	YES	YES	YES	YES	YES	YES	YES	YES	8	P14866	HNRNPL
71997000	51497000	68030000	64224000	71984000	64631000	55188000	57056000	63792000	26.1014	25.618	26.0197	25.9366	26.1012	25.9457	25.7179	25.7659	25.9269	3	3	3	P52272	HNRNPM		YES	YES	YES	YES	YES	YES	YES	YES	8	P52272	HNRNPM		YES
356650000	417900000	339840000	317880000	440970000	414290000	59860000	52089000	61666000	28.4099	28.6386	28.3403	28.2439	28.7161	28.6261	25.8351	25.6345	25.878	3	3	3	O43390	HNRNPR	X	YES	YES	YES	YES	YES	YES	YES	YES	8	O43390	HNRNPR	YES	YES	YES
256180000	295310000	262760000	267980000	426780000	334530000	198990000	179330000	183800000	27.9326	28.1377	27.9692	27.9976	28.6689	28.3176	27.5681	27.418	27.4536	3	3	3	Q00839	HNRNPU		YES	YES	YES	YES	YES	YES	YES	YES	8	Q00839	HNRNPU	YES		YES
14010000	9595400	8705100	10203000	15006000	13205000	9671600	8164700	8432100	23.74	23.1939	23.0534	23.2825	23.839	23.6546	23.2053	22.961	23.0075	3	3	3	A0A0A0MRA5	HNRNPUL1		YES			YES		YES	YES		4	A0A0A0MRA5	HNRNPUL1
34838000	23495000	24315000	17080000	15882000	14570000	17735000	16104000	21794000	25.0542	24.4859	24.5353	24.0258	23.9209	23.7965	24.0801	23.9409	24.3774	3	3	3	Q5SSJ5	HP1BP3									YES	1	Q5SSJ5	HP1BP3	YES
52741000	67501000	51051000	38072000	23741000	29317000	28960000	30231000	27371000	25.6524	26.0084	25.6054	25.1822	24.5009	24.8052	24.7876	24.8495	24.7061	3	3	3	Q99714	HSD17B10	X	YES	YES						YES	3	Q99714	HSD17B10
	1407100	1025100	1639500	1838800		1517000	1473900	1481800		20.4243	19.9673	20.6448	20.8103		20.5328	20.4912	20.4989	2	2	3	D6RCD0	HSD17B11											D6RCD0	HSD17B11
17833000	21762000	20571000	19420000	16341000	20065000	24734000	22380000	22913000	24.088	24.3753	24.2941	24.211	23.962	24.2582	24.56	24.4157	24.4497	3	3	3	P51659	HSD17B4									YES	1	P51659	HSD17B4
103900000	110390000	144650000	123220000	85679000	109520000	132380000	148950000	147250000	26.6306	26.718	27.108	26.8767	26.3524	26.7066	26.9801	27.1503	27.1337	3	3	3	P07900	HSP90AA1		YES	YES		YES	YES			YES	5	P07900	HSP90AA1
398540000	506890000	855470000	552440000	417420000	468660000	809640000	812960000	816790000	28.5701	28.9171	29.6721	29.0412	28.6369	28.804	29.5927	29.5986	29.6054	3	3	3	P08238	HSP90AB1		YES	YES		YES	YES				4	P08238	HSP90AB1	YES
57566000	53573000	120350000	66901000	55262000	65538000	90504000	105150000	91419000	25.7787	25.675	26.8427	25.9955	25.7198	25.9658	26.4315	26.6479	26.446	3	3	3	P14625	HSP90B1			YES			YES				2	P14625	HSP90B1
6899000	8744000	9988800	7411400	6690600	8538800	11820000	9623900	10016000	22.718	23.0599	23.2519	22.8213	22.6737	23.0256	23.4947	23.1982	23.2558	3	3	3	A0A0G2JIW1	HSPA1B		YES			YES					2	A0A0G2JIW1	HSPA1B
20681000	21786000	28951000	34446000	22219000	27138000	29395000	34290000	37109000	24.3018	24.3769	24.7871	25.0378	24.4053	24.6938	24.8091	25.0313	25.1453	3	3	3	P34932	HSPA4									YES	1	P34932	HSPA4
126290000	148100000	210120000	183880000	126800000	155080000	182050000	188200000	196530000	26.9122	27.142	27.6466	27.4542	26.918	27.2084	27.4398	27.4877	27.5502	3	3	3	P11021	HSPA5			YES			YES			YES	3	P11021	HSPA5
516180000	498130000	738180000	557750000	481630000	535900000	718870000	657310000	770590000	28.9433	28.8919	29.4594	29.055	28.8434	28.9974	29.4212	29.292	29.5214	3	3	3	P11142	HSPA8		YES	YES		YES	YES			YES	5	P11142	HSPA8	YES
416140000	500490000	383900000	279160000	252190000	267300000	263870000	285830000	318400000	28.6325	28.8988	28.5162	28.0565	27.9099	27.9939	27.9753	28.0906	28.2463	3	3	3	P38646	HSPA9		YES			YES	YES			YES	4	P38646	HSPA9
	12574000	1751400	2085200	1665700	1703600	18829000	5182300	949160		23.5839	20.7401	20.9918	20.6677	20.7002	24.1665	22.3052	19.8563	2	3	3	P04792	HSPB1					YES	YES			YES	3	P04792	HSPB1	YES
850640000	893790000	897320000	823430000	627080000	772200000	1035800000	942570000	1062400000	29.664	29.7354	29.741	29.6171	29.2241	29.5244	29.9481	29.812	29.9847	3	3	3	P10809	HSPD1					YES	YES			YES	3	P10809	HSPD1
20934000	16579000	29323000	16824000	15397000	16443000	17891000	18939000	17862000	24.3193	23.9829	24.8055	24.004	23.8761	23.971	24.0927	24.1749	24.0904	3	3	3	P61604	HSPE1			YES		YES	YES				3	P61604	HSPE1
16422000	17995000	19457000	21138000	15956000	16765000	23307000	24492000	27599000	23.9691	24.1011	24.2138	24.3333	23.9276	23.9989	24.4743	24.5458	24.7181	3	3	3	Q92598	HSPH1									YES	1	Q92598	HSPH1
1962900	1970800	1401100	1758500	1733100		4149800	2448900	3403000	20.9046	20.9103	20.4181	20.7459	20.7249		21.9846	21.2237	21.6984	3	2	3	Q7Z6Z7	HUWE1					YES				YES	2	Q7Z6Z7	HUWE1
10014000	13234000	22525000	11804000	5847500	11750000	19477000	18308000	17954000	23.2555	23.6577	24.425	23.4928	22.4794	23.4862	24.2153	24.126	24.0978	3	3	3	A0A087X054	HYOU1											A0A087X054	HYOU1
9123700	10306000	12977000	11735000	7219000	9233300	13961000	15868000	15998000	23.1212	23.297	23.6295	23.4843	22.7834	23.1384	23.7349	23.9196	23.9314	3	3	3	J3KR24	IARS											J3KR24	IARS
17988000	15908000	10055000	9474100	9888000	8784400	8828300	12907000	9779300	24.1005	23.9232	23.2614	23.1756	23.2372	23.0665	23.0737	23.6217	23.2213	3	3	3	Q9NSE4	IARS2									YES	1	Q9NSE4	IARS2
177040000	145950000	144740000	84479000	89905000	79148000	61971000	68315000	70581000	27.3995	27.1209	27.1089	26.3321	26.4219	26.238	25.8851	26.0257	26.0728	3	3	3	P48735	IDH2	X					YES				1	P48735	IDH2
21267000	23229000	15519000	7661700	9800900	8800200	8055000	7179000	7820200	24.3421	24.4694	23.8875	22.8692	23.2245	23.0691	22.9415	22.7754	22.8988	3	3	3	H0YL72	IDH3A	X										H0YL72	IDH3A
16577000	13056000	12546000	6981800	9441700	8374500	4713800	4224600	4386000	23.9827	23.6382	23.5807	22.7352	23.1706	22.9976	22.1685	22.0104	22.0645	3	3	3	A0A087WZN1	IDH3B	X										A0A087WZN1	IDH3B
33128000	26743000	18119000	29392000	35912000	29455000	22229000	21959000	23578000	24.9815	24.6727	24.111	24.8089	25.098	24.812	24.4059	24.3883	24.4909	3	3	3	Q16666	IFI16					YES				YES	2	Q16666	IFI16
96196000	91938000	88963000	75894000	132910000	103270000	17184000	18342000	19182000	26.5195	26.4542	26.4067	26.1775	26.9859	26.6218	24.0346	24.1286	24.1932	3	3	3	Q9NZI8	IGF2BP1	X	YES	YES		YES	YES	YES	YES		6	Q9NZI8	IGF2BP1	YES
38993000	36521000	35340000	38578000	59920000	48615000	7150400	6725500	7398800	25.2167	25.1222	25.0748	25.2013	25.8365	25.5349	22.7696	22.6812	22.8189	3	3	3	O00425	IGF2BP3	X	YES	YES		YES	YES	YES	YES		6	O00425	IGF2BP3	YES
7140300	6847000	7981500	6812500	7307600	7454000	10271000	10596000	11609000	22.7676	22.707	22.9282	22.6998	22.801	22.8296	23.2921	23.337	23.4687	3	3	3	P11717	IGF2R											P11717	IGF2R
35915000	22539000	11995000	40656000	52854000	40637000	27154000	12027000	9361200	25.0981	24.4259	23.5159	25.277	25.6555	25.2763	24.6947	23.5198	23.1583	3	3	3	P01876	IGHA1	X										P01876	IGHA1
13523000	12224000	8820000	16095000	23470000	18127000	22707000	7620200	4159100	23.6889	23.5432	23.0723	23.9401	24.4843	24.1116	24.4366	22.8614	21.9878	3	3	3	A0A0A0MS07	IGHG1											A0A0A0MS07	IGHG1
5454500	5415500	5387800	7331200	8612400	6942000	6057200	5354300	5496100	22.379	22.3687	22.3613	22.8056	23.038	22.7269	22.5302	22.3523	22.39	3	3	3	A0A087WZW8	IGKV3-11											A0A087WZW8	IGKV3-11
84368000	86752000	67732000	112610000	178740000	143990000	32779000	30017000	34243000	26.3302	26.3704	26.0133	26.7468	27.4133	27.1014	24.9663	24.8393	25.0293	3	3	3	B4DY09	ILF2	X	YES	YES		YES	YES	YES	YES		6	B4DY09	ILF2	YES		YES
107680000	79926000	78651000	126300000	187880000	166290000	31198000	32161000	36151000	26.6822	26.2522	26.229	26.9123	27.4852	27.3091	24.895	24.9388	25.1075	3	3	3	Q12906	ILF3	X	YES	YES		YES	YES	YES	YES	YES	7	Q12906	ILF3	YES	YES	YES
17215000	16797000	27320000	14638000	12865000	15415000	21162000	20553000	26000000	24.0372	24.0017	24.7035	23.8032	23.6169	23.8778	24.335	24.2928	24.632	3	3	3	B9A067	IMMT					YES					1	B9A067	IMMT
21863000	26589000	31186000	25981000	14323000	22443000	32552000	29984000	31549000	24.382	24.6643	24.8944	24.631	23.7718	24.4198	24.9562	24.8377	24.9111	3	3	3	H0Y4R1	IMPDH2											H0Y4R1	IMPDH2
2103500	2099000	2198600	1308300		1354300	2359400	1916100	2207700	21.0044	21.0013	21.0682	20.3193		20.3691	21.17	20.8697	21.0741	3	2	3	Q9NQS7	INCENP									YES	1	Q9NQS7	INCENP
2937300	1699000	3225200	3032400	3179300	2308800	2668600	2463100	2492700	21.4861	20.6963	21.621	21.532	21.6003	21.1387	21.3477	21.232	21.2493	3	3	3	H0Y8C6	IPO5		YES	YES							2	H0Y8C6	IPO5			YES
8131000	14759000	14037000	10937000	11085000	11173000	18442000	16396000	18332000	22.955	23.8151	23.7427	23.3827	23.4021	23.4135	24.1365	23.9668	24.1279	3	3	3	P46940	IQGAP1									YES	1	P46940	IQGAP1			YES
9995000	10387000	14291000	11145000	6752300	11058000	17871000	16315000	15619000	23.2528	23.3083	23.7686	23.4099	22.6869	23.3986	24.0911	23.9597	23.8968	3	3	3	D3DSM0	ITGB2											D3DSM0	ITGB2
105810000	135780000	98728000	59811000	131510000	60661000	70709000	142150000	19474000	26.6569	27.0167	26.557	25.8339	26.9706	25.8543	26.0754	27.0828	24.215	3	3	3	P14923	JUP											P14923	JUP
14397000	18202000	15916000	16994000	12252000	15604000	18174000	20577000	19144000	23.7793	24.1176	23.924	24.0185	23.5465	23.8954	24.1154	24.2945	24.1904	3	3	3	Q15046	KARS									YES	1	Q15046	KARS
2662500	2475300	1501700	2845300		2857000	4126200	3450800	5303400	21.3444	21.2392	20.5182	21.4401		21.4461	21.9764	21.7185	22.3385	3	2	3	O60341	KDM1A											O60341	KDM1A
2301500	1933100	4225100	2938900	3081800	2445400	2383600	2443800	2321300	21.1341	20.8825	22.0106	21.4868	21.5553	21.2216	21.1847	21.2207	21.1465	3	3	3	Q07666	KHDRBS1		YES	YES		YES		YES	YES	YES	6	Q07666	KHDRBS1
38952000	31191000	37329000	37028000	40184000	48168000	33438000	36089000	36105000	25.2152	24.8946	25.1538	25.1421	25.2601	25.5216	24.995	25.1051	25.1057	3	3	3	A0A087WTP3	KHSRP		YES	YES	YES	YES	YES	YES	YES		7	A0A087WTP3	KHSRP
2497400	3995500	2073000	3472800	2780100	2637700	3554300	3502100	4668000	21.252	21.9299	20.9833	21.7277	21.4067	21.3308	21.7611	21.7398	22.1544	3	3	3	P52732	KIF11									YES	1	P52732	KIF11
2687400	3376400	4550000	3057700	2876900		3874600	6094300	5600400	21.3578	21.6871	22.1174	21.544	21.4561		21.8856	22.539	22.4171	3	2	3	P33176	KIF5B									YES	1	P33176	KIF5B
2590500	1965200	2630600	1946400		2032100	1945800	2973200	2809900	21.3048	20.9062	21.327	20.8924		20.9545	20.8919	21.5036	21.4221	3	2	3	Q9BW19	KIFC1									YES	1	Q9BW19	KIFC1
28884000	34614000	37847000	37181000	32753000	32378000	39514000	42241000	47373000	24.7838	25.0449	25.1737	25.1481	24.9651	24.9485	25.2359	25.3321	25.4976	3	3	3	P52292	KPNA2		YES	YES						YES	3	P52292	KPNA2
18633000	20526000	28827000	21802000	18419000	22122000	27107000	32658000	30699000	24.1514	24.2909	24.7809	24.378	24.1347	24.399	24.6922	24.9609	24.8717	3	3	3	Q14974	KPNB1		YES	YES						YES	3	Q14974	KPNB1
208240000	203480000	162170000	267030000	312340000	214320000	135730000	187730000	156850000	27.6337	27.6003	27.2729	27.9924	28.2185	27.6752	27.0162	27.4841	27.2248	3	3	3	Q5T749	KPRP											Q5T749	KPRP
23051000	23834000	13686000	13032000	11370000	13962000	12247000	14607000	14050000	24.4583	24.5065	23.7062	23.6356	23.4387	23.735	23.5459	23.8002	23.7441	3	3	3	P28838	LAP3											P28838	LAP3
9572400	7894800	4395600	8185700	13070000	12592000	7832200	8203600	7914900	23.1904	22.9125	22.0676	22.9647	23.6398	23.586	22.901	22.9678	22.9161	3	3	3	A0A0B4J210	LARP1		YES	YES		YES	YES		YES		5	A0A0B4J210	LARP1
9263700	8244900	9107400	8028800	5653200	8736600	13199000	14597000	14952000	23.1432	22.9751	23.1186	22.9368	22.4306	23.0586	23.6539	23.7992	23.8338	3	3	3	Q9P2J5	LARS	X								YES	1	Q9P2J5	LARS
10626000	8163900	8409000	9633400	8346200	9729200	10253000	8077800	10910000	23.3411	22.9608	23.0035	23.1996	22.9927	23.2139	23.2895	22.9455	23.3791	3	3	3	Q14739	LBR		YES							YES	2	Q14739	LBR
21952000	22710000	30571000	21896000	22033000	22140000	27597000	27478000	31216000	24.3878	24.4368	24.8657	24.3842	24.3932	24.4002	24.718	24.7118	24.8958	3	3	3	Q573B4	LCK											Q573B4	LCK
9573500	10914000	7755100	17515000	17853000	10584000	6288700	5958400	4068600	23.1906	23.3797	22.8867	24.0621	24.0897	23.3354	22.5843	22.5065	21.9561	3	3	3	P31025	LCN1	X										P31025	LCN1
99185000	89423000	141540000	121250000	78024000	96884000	177530000	162880000	170690000	26.5636	26.4141	27.0766	26.8534	26.2174	26.5298	27.4035	27.2792	27.3468	3	3	3	P13796	LCP1									YES	1	P13796	LCP1
61203000	59529000	70417000	52153000	57823000	63110000	79040000	68656000	77913000	25.8671	25.8271	26.0694	25.6362	25.7851	25.9114	26.2361	26.0329	26.2154	3	3	3	P00338	LDHA			YES						YES	2	P00338	LDHA
117270000	111570000	137080000	118130000	94049000	122090000	136700000	169730000	152220000	26.8053	26.7334	27.0304	26.8158	26.4869	26.8634	27.0264	27.3387	27.1816	3	3	3	P07195	LDHB						YES			YES	2	P07195	LDHB
11749000	8022400	12129000	10419000	8354000	11136000	12089000	11608000	13126000	23.486	22.9356	23.532	23.3127	22.994	23.4087	23.5272	23.4686	23.6459	3	3	3	O95202	LETM1											O95202	LETM1
	15098000	3569100	3569300	3009900	2662200	3060200	2457500	1767200		23.8479	21.7671	21.7672	21.5213	21.3442	21.5452	21.2288	20.753	2	3	3	P47929	LGALS7											P47929	LGALS7
18592000	20639000	15010000	20424000	26563000	18373000	9184600	11802000	9162600	24.1482	24.2989	23.8394	24.2838	24.6629	24.1311	23.1308	23.4925	23.1273	3	3	3	O00182	LGALS9	X										O00182	LGALS9
8878300	7752600	10827000	7726200	9102800	8516900	10962000	11280000	12539000	23.0819	22.8862	23.3681	22.8813	23.1179	23.0219	23.386	23.4273	23.5799	3	3	3	P49257	LMAN1									YES	1	P49257	LMAN1
6204500	6613600	8906200	11074000	6150300	6159100	11835000	10890000	10214000	22.5649	22.657	23.0864	23.4007	22.5522	22.5543	23.4966	23.3765	23.284	3	3	3	Q12907	LMAN2											Q12907	LMAN2
33112000	32350000	53660000	27253000	30473000	28642000	47740000	50519000	43686000	24.9809	24.9473	25.6773	24.6999	24.861	24.7716	25.5087	25.5903	25.3807	3	3	3	P20700	LMNB1									YES	1	P20700	LMNB1
1634700	1877200	2212600	1436600		1617600	1595900	2657600	2647200	20.6406	20.8402	21.0773	20.4542		20.6254	20.6059	21.3417	21.336	3	2	3	J9JID7	LMNB2											J9JID7	LMNB2
124830000	125730000	95552000	59096000	59947000	47227000	52873000	40671000	49041000	26.8954	26.9058	26.5098	25.8166	25.8372	25.4931	25.656	25.2775	25.5475	3	3	3	K7EJE8	LONP1	X										K7EJE8	LONP1
30341000	19166000	16337000	27550000	34075000	23553000	10025000	8146100	16608000	24.8548	24.192	23.9616	24.7155	25.0222	24.4894	23.2571	22.9577	23.9854	3	3	3	P23490	LOR	X										P23490	LOR
264500000	239650000	195940000	157100000	272270000	242830000	65932000	64298000	70498000	27.9787	27.8364	27.5458	27.2271	28.0205	27.8554	25.9745	25.9383	26.0711	3	3	3	P42704	LRPPRC	X	YES	YES		YES	YES		YES	YES	6	P42704	LRPPRC
2104100	2737700	4582600	3289000	2557400	2400600	3629300	3434200	4198400	21.0048	21.3845	22.1277	21.6492	21.2862	21.195	21.7913	21.7115	22.0014	3	3	3	Q8N1G4	LRRC47		YES	YES						YES	3	Q8N1G4	LRRC47
6910900	4307400	6819700	6726400	5749100	8289200	9440800	9255500	9172600	22.7204	22.0384	22.7013	22.6814	22.4549	22.9828	23.1705	23.1419	23.1289	3	3	3	Q96AG4	LRRC59			YES		YES				YES	3	Q96AG4	LRRC59
4656400	4713100	7230300	5019400	4924300	5965100	7906000	9543500	7964300	22.1508	22.1682	22.7856	22.2591	22.2315	22.5081	22.9145	23.1861	22.9251	3	3	3	P48449	LSS									YES	1	P48449	LSS
6110600	4121300	5150200	4368300	8116900	6460000	4187700	4269800	4357000	22.5429	21.9747	22.2962	22.0586	22.9525	22.6231	21.9977	22.0257	22.0549	3	3	3	P09960	LTA4H					YES				YES	2	P09960	LTA4H
9771600	9664900	6100500	16014000	16722000	14153000	7762400	4832700	3331900	23.2202	23.2043	22.5405	23.9328	23.9952	23.7546	22.8881	22.2044	21.6679	3	3	3	E7EQB2	LTF	X										E7EQB2	LTF
4798800	2513200	1968000	3013400	5346800	3793900	2844900	2814800	4011400	22.1942	21.2611	20.9083	21.523	22.3502	21.8553	21.4399	21.4246	21.9357	3	3	3	Q9NQ29	LUC7L			YES						YES	2	Q9NQ29	LUC7L
10100000	9933300	6547100	12081000	14084000	12462000	9252800	9103800	7515300	23.2679	23.2438	22.6424	23.5262	23.7476	23.571	23.1415	23.118	22.8414	3	3	3	J3KPP4	LUC7L3		YES			YES					2	J3KPP4	LUC7L3
25257000	31704000	9372300	39515000	28032000	26952000	18734000	12335000	8873900	24.5902	24.9182	23.16	25.2359	24.7406	24.6839	24.1592	23.5563	23.0811	3	3	3	LYSC_HUMAN	LYZ											LYSC_HUMAN	LYZ
3282800	2855600	6429500	4325600		3484900	4420400	5998300	4757600	21.6465	21.4454	22.6163	22.0445		21.7327	22.0757	22.5161	22.1818	3	2	3	A8K878	MANF						YES				1	A8K878	MANF
9710600	8094300	6092600	9455700	13451000	12218000	5015700	5462900	5943200	23.2111	22.9485	22.5386	23.1728	23.6812	23.5425	22.258	22.3812	22.5028	3	3	3	E7EVA0	MAP4		YES	YES		YES	YES				4	E7EVA0	MAP4
3260600	6659600	8862500	5121300	2578000	3598200	7221300	4493300	6125200	21.6367	22.667	23.0793	22.2881	21.2978	21.7788	22.7838	22.0993	22.5463	3	3	3	Q15691	MAPRE1		YES	YES						YES	3	Q15691	MAPRE1
6277400	7552900	12014000	8003300	7197800	6821800	11878000	10993000	13408000	22.5817	22.8486	23.5182	22.9322	22.7791	22.7017	23.5018	23.3901	23.6766	3	3	3	P56192	MARS									YES	1	P56192	MARS
3852300	9138200	10954000	10511000	4742900	5418300	12365000	14589000	10631000	21.8773	23.1235	23.385	23.3254	22.1773	22.3694	23.5598	23.7984	23.3418	3	3	3	P31153	MAT2A						YES			YES	2	P31153	MAT2A
17890000	15072000	17394000	24862000	24647000	26995000	19931000	17921000	20068000	24.0927	23.8454	24.0521	24.5674	24.5549	24.6862	24.2485	24.0951	24.2584	3	3	3	A0A0R4J2E8	MATR3		YES	YES		YES	YES	YES	YES		6	A0A0R4J2E8	MATR3	YES	YES
12422000	7501900	7669300	18086000	27896000	23266000	4843400	4482200	4211400	23.5664	22.8388	22.8707	24.1084	24.7336	24.4717	22.2076	22.0958	22.0059	3	3	3	C9JP00	MBNL1	X	YES			YES		YES	YES		4	C9JP00	MBNL1
10749000	7409900	6446100	12081000	22319000	18750000	3807600	4830800	4180400	23.3577	22.821	22.62	23.5262	24.4118	24.1604	21.8605	22.2038	21.9952	3	3	3	Q96N66	MBOAT7	X										Q96N66	MBOAT7
21949000	20476000	22149000	20710000	20907000	23338000	24592000	27546000	28414000	24.3877	24.2874	24.4007	24.3038	24.3175	24.4762	24.5517	24.7153	24.7601	3	3	3	P49736	MCM2									YES	1	P49736	MCM2
38972000	35075000	33345000	35224000	31451000	40856000	52088000	49761000	51468000	25.2159	25.0639	24.991	25.0701	24.9066	25.284	25.6344	25.5685	25.6172	3	3	3	P25205	MCM3									YES	1	P25205	MCM3
16116000	15325000	18793000	16102000	10470000	15439000	23624000	24615000	22236000	23.942	23.8694	24.1637	23.9407	23.3198	23.8801	24.4937	24.553	24.4064	3	3	3	P33991	MCM4									YES	1	P33991	MCM4
19686000	21233000	24800000	22536000	15675000	22268000	28521000	26715000	26654000	24.2307	24.3398	24.5638	24.4257	23.902	24.4085	24.7655	24.6711	24.6678	3	3	3	B1AHB1	MCM5											B1AHB1	MCM5
24708000	17231000	28148000	21806000	18238000	24340000	32316000	33846000	32921000	24.5585	24.0385	24.7465	24.3782	24.1204	24.5368	24.9457	25.0125	24.9725	3	3	3	Q14566	MCM6									YES	1	Q14566	MCM6
26733000	31082000	33686000	25462000	20140000	34061000	43319000	42339000	46774000	24.6721	24.8896	25.0056	24.6018	24.2636	25.0216	25.3685	25.3355	25.4792	3	3	3	P33993	MCM7									YES	1	P33993	MCM7
9844400	10435000	15636000	7248400	9760300	10581000	12372000	13695000	16301000	23.2309	23.3149	23.8984	22.7892	23.2185	23.335	23.5606	23.7071	23.9585	3	3	3	B9A041	MDH1						YES				1	B9A041	MDH1
82176000	100140000	111880000	94928000	73523000	88914000	107150000	106750000	109130000	26.2922	26.5774	26.7374	26.5003	26.1317	26.4059	26.6751	26.6697	26.7015	3	3	3	P40926	MDH2		YES	YES		YES	YES				4	P40926	MDH2
15785000	16794000	9419000	9886700	9135200	10094000	14187000	12873000	15446000	23.9121	24.0014	23.1671	23.2371	23.123	23.267	23.7581	23.6178	23.8807	3	3	3	P23368	ME2											P23368	ME2
11099000	14985000	11384000	14414000	9724300	10597000	16110000	17495000	14211000	23.4039	23.837	23.4405	23.781	23.2132	23.3372	23.9415	24.0604	23.7605	3	3	3	P14174	MIF									YES	1	P14174	MIF
9113900	12379000	6164500	2720600	3230600	3293900	5126100	5577800	3914800	23.1196	23.5614	22.5556	21.3755	21.6234	21.6514	22.2894	22.4113	21.9005	3	3	3	A0A087WV66	MKI67			YES		YES		YES	YES		4	A0A087WV66	MKI67
20779000	16639000	11898000	22404000	32661000	28920000	16840000	19815000	15515000	24.3086	23.9881	23.5042	24.4173	24.9611	24.7856	24.0054	24.2401	23.8872	3	3	3	F5H1S8	MLEC											F5H1S8	MLEC
2908500	2705600	2519100	2663000	2419900	2589200	3386600	3480300	4268700	21.4718	21.3675	21.2645	21.3446	21.2065	21.3041	21.6914	21.7308	22.0254	3	3	3	Q13724	MOGS											Q13724	MOGS
106040000	98373000	87640000	162690000	282450000	245480000	3404200	3279100	3531600	26.66	26.5518	26.3851	27.2776	28.0734	27.871	21.6989	21.6449	21.7519	3	3	3	Q9HCE1	MOV10	X	YES	YES		YES			YES	YES	5	Q9HCE1	MOV10		YES
6609300	4352300	4417300	2863200	3617600	3124400	2360200		1861000	22.6561	22.0533	22.0747	21.4492	21.7866	21.5751	21.1705		20.8276	3	3	2	Q9BYD6	MRPL1	X	YES	YES		YES					3	Q9BYD6	MRPL1
1316800	1573500	1936500	1051800		1437900	885940	929010	960110	20.3286	20.5855	20.885	20.0044		20.4555	19.7568	19.8253	19.8728	3	2	3	Q9Y3B7	MRPL11	X	YES	YES		YES					3	Q9Y3B7	MRPL11
1276700	2356900	1693000	2857500	1917700	2383600	2488500	4579200	2774500	20.284	21.1685	20.6912	21.4463	20.8709	21.1847	21.2468	22.1267	21.4038	3	3	3	B4DLN1	MRPL12											B4DLN1	MRPL12
6499800	4584100	3384200	2630800	3152700	3369300	2725900	2046100	2258300	22.632	22.1282	21.6904	21.3271	21.5882	21.684	21.3783	20.9644	21.1068	3	3	3	P82933	MRPS9	X	YES	YES						YES	3	P82933	MRPS9
1787000	1978400	1985400	2456200	3881900	3096500	1201500	1166900	1255700	20.7691	20.9159	20.921	21.228	21.8883	21.5622	20.1964	20.1542	20.2601	3	3	3	B4DHE8	MSI2	X	YES	YES		YES	YES	YES	YES		6	B4DHE8	MSI2
58285000	55558000	81368000	83949000	77854000	72046000	64705000	68490000	68126000	25.7966	25.7275	26.278	26.323	26.2143	26.1024	25.9474	26.0294	26.0217	3	3	3	P26038	MSN						YES			YES	2	P26038	MSN
4544700	4047100	7390300	4247500	3680900	5235600	8469600	9913300	10118000	22.1158	21.9485	22.8172	22.0182	21.8116	22.3199	23.0139	23.2409	23.2704	3	3	3	O94776	MTA2	X								YES	1	O94776	MTA2
1950900		2927500	2468800		2579500	3461400	3098000	2378800	20.8957		21.4812	21.2354		21.2987	21.7229	21.5629	21.1818	2	2	3	Q9Y6C9	MTCH2											Q9Y6C9	MTCH2
5268700	7690500	8527900	4255300	5100700	6694400	9671500	9135200	10488000	22.329	22.8746	23.0238	22.0208	22.2823	22.6745	23.2053	23.123	23.3222	3	3	3	P00403	MT-CO2											P00403	MT-CO2
13196000	13121000	6860000	8432400	8150500	9591300	12492000	12484000	14016000	23.6536	23.6454	22.7098	23.0075	22.9585	23.1933	23.5745	23.5736	23.7406	3	3	3	Q86UE4	MTDH		YES	YES		YES	YES			YES	5	Q86UE4	MTDH
42910000	38046000	39070000	34249000	29580000	41028000	55623000	54677000	58285000	25.3548	25.1812	25.2196	25.0296	24.8181	25.2901	25.7292	25.7044	25.7966	3	3	3	P11586	MTHFD1						YES			YES	2	P11586	MTHFD1
30885000	30820000	20548000	13038000	14218000	16643000	13216000	13104000	13111000	24.8804	24.8774	24.2925	23.6362	23.7612	23.9884	23.6558	23.6435	23.6443	3	3	3	A0A087WVM4	MTHFD1L	X										A0A087WVM4	MTHFD1L
1456300	1245800	1718100	1378300		1582700	1712000	2468300	2392100	20.4739	20.2486	20.7124	20.3945		20.594	20.7073	21.2351	21.1898	3	2	3	A0A0A0MRK6	MTX1											A0A0A0MRK6	MTX1
6660400	7184300	4202900	2800600	3606500	4350600	2267700	2335500	2649800	22.6672	22.7764	22.003	21.4173	21.7822	22.0528	21.1128	21.1553	21.3375	3	3	3	P22033	MUT	X										P22033	MUT
3208000	4618900	3722600	6713800	7955700	5346400	3401700	2841500	3411400	21.6132	22.1391	21.8279	22.6787	22.9236	22.3501	21.6978	21.4382	21.7019	3	3	3	M0QXF7	MYDGF											M0QXF7	MYDGF
9593400	10920000	13359000	12022000	9970900	12276000	14054000	15565000	17433000	23.1936	23.3805	23.6713	23.5192	23.2493	23.5493	23.7445	23.8918	24.0553	3	3	3	P35580	MYH10									YES	1	P35580	MYH10
122460000	139100000	171140000	142400000	108130000	132180000	212990000	209070000	222480000	26.8677	27.0515	27.3506	27.0854	26.6882	26.9779	27.6662	27.6394	27.7291	3	3	3	P35579	MYH9		YES	YES						YES	3	P35579	MYH9
2600500	3490500	5872400	3470000	6773500	2668200	4647100	6154000	5513900	21.3104	21.735	22.4855	21.7265	22.6915	21.3474	22.1479	22.5531	22.3946	3	3	3	J3QRS3	MYL12A											J3QRS3	MYL12A
20291000	25187000	32029000	23181000	16447000	20849000	35238000	35788000	38018000	24.2743	24.5862	24.9329	24.4664	23.9713	24.3135	25.0706	25.093	25.1802	3	3	3	B0I1T2	MYO1G											B0I1T2	MYO1G
13107000	10759000	11540000	9644300	9554300	13718000	17982000	18357000	17247000	23.6438	23.359	23.4601	23.2012	23.1877	23.7096	24.1001	24.1298	24.0398	3	3	3	F8W1N5	NACA	X										F8W1N5	NACA	YES
5069300	3373500	13979000	2842100		3714800	4549700	3265300	4132800	22.2734	21.6858	23.7368	21.4385		21.8249	22.1173	21.6388	21.9787	3	2	3	F8W020	NAP1L1		YES	YES							2	F8W020	NAP1L1
3219200	2656600	4620400	3061000		2890500	2642800	1672200	3287000	21.6183	21.3411	22.1396	21.5456		21.4629	21.3336	20.6733	21.6483	3	2	3	C9J6D1	NAP1L4			YES		YES					2	C9J6D1	NAP1L4
1790800	2670900	4784000	3197100		4596500	4324400	4868200	3439500	20.7722	21.3489	22.1898	21.6083		22.1321	22.0441	22.215	21.7138	3	2	3	M0R0Y2	NAPA											M0R0Y2	NAPA
2926400	2646200	4522500	4120000	4147900	3814500	5518100	4843700	5718400	21.4807	21.3355	22.1087	21.9742	21.9839	21.8631	22.3957	22.2077	22.4472	3	3	3	O43776	NARS			YES						YES	2	O43776	NARS
6692200	7768800	5442800	5465000	4698600	5839200	7519000	6119300	7235900	22.674	22.8893	22.3759	22.3818	22.1638	22.4773	22.8421	22.5449	22.7867	3	3	3	Q9H0A0	NAT10		YES	YES		YES				YES	4	Q9H0A0	NAT10
2765200	2748900	2719300		2547800	3153700	2965700	3263700	3505600	21.399	21.3904	21.3748		21.2808	21.5886	21.4999	21.6381	21.7412	3	2	3	Q09161	NCBP1		YES							YES	2	Q09161	NCBP1
5531300	4230700		5297700	7291600		2736800	3837400	2498600	22.3992	22.0125		22.3369	22.7978		21.3841	21.8717	21.2527	2	2	3	Q6ZVX7	NCCRP1											Q6ZVX7	NCCRP1
238730000	230580000	192660000	127980000	133490000	157590000	196600000	198140000	217790000	27.8308	27.7807	27.5215	26.9313	26.9922	27.2316	27.5507	27.5619	27.6984	3	3	3	P19338	NCL		YES	YES	YES	YES	YES	YES	YES	YES	8	P19338	NCL	YES		YES
2633400	2557400	2488300	3764400	5289100	3062100	4720500	6236500	6957300	21.3285	21.2862	21.2467	21.844	22.3346	21.5461	22.1705	22.5723	22.7301	3	3	3	Q969V3	NCLN	X										Q969V3	NCLN
5075400	3374700	3919000	2144300	6194900	7073200	1889100	894150	1403500	22.2751	21.6863	21.9021	21.0321	22.5626	22.7539	20.8493	19.7702	20.4206	3	3	3	Q9HCD5	NCOA5	X	YES							YES	2	Q9HCD5	NCOA5
1486000	2057600	2652100	1735400	1067600	1569100	1963700	2320300	1704300	20.503	20.9725	21.3387	20.7268	20.0259	20.5815	20.9051	21.1459	20.7007	3	3	3	O95168	NDUFB4											O95168	NDUFB4
5369200	7094200	4153900	4251400	3400700	3832400	4577300	3607400	4771100	22.3563	22.7582	21.986	22.0195	21.6974	21.8698	22.1261	21.7825	22.1859	3	3	3	B4DJ81	NDUFS1											B4DJ81	NDUFS1
2706000	3936700	2792100	3307100	2528600	2157600	2560200	2457500	2225300	21.3677	21.9086	21.4129	21.6571	21.2699	21.041	21.2878	21.2288	21.0856	3	3	3	O75489	NDUFS3											O75489	NDUFS3
10950000	7357300	11165000	10816000	8684800	9421100	14368000	17493000	12585000	23.3844	22.8107	23.4125	23.3667	23.0501	23.1675	23.7764	24.0603	23.5852	3	3	3	B1AHD1	NHP2L1											B1AHD1	NHP2L1
20486000	19145000	33044000	21767000	18119000	19793000	24667000	25568000	25229000	24.2881	24.1905	24.9779	24.3756	24.111	24.2385	24.5561	24.6078	24.5886	3	3	3	Q32Q12	NME1-NME2											Q32Q12	NME1-NME2
39514000	37314000	22063000	30630000	36748000	35069000	31419000	29406000	34592000	25.2359	25.1532	24.3951	24.8684	25.1312	25.0637	24.9051	24.8096	25.0439	3	3	3	Q13423	NNT									YES	1	Q13423	NNT
1760600	2643900		1461800	1839000		1574800	2651900	2043000	20.7476	21.3342		20.4793	20.8105		20.5867	21.3386	20.9623	2	2	3	A0A0A0MRM9	NOLC1		YES	YES		YES		YES	YES		5	A0A0A0MRM9	NOLC1	YES
11958000	11868000	9282900	9591600	11612000	10387000	12383000	12768000	12030000	23.5115	23.5006	23.1461	23.1933	23.4691	23.3083	23.5619	23.606	23.5201	3	3	3	J3KN36	NOMO3											J3KN36	NOMO3
38008000	32041000	46260000	42009000	42686000	50522000	39662000	39217000	38142000	25.1798	24.9334	25.4633	25.3242	25.3473	25.5904	25.2413	25.225	25.1849	3	3	3	Q15233	NONO		YES	YES		YES	YES	YES	YES	YES	7	Q15233	NONO
22104000	20458000	12527000	10070000	13077000	12752000	15503000	15254000	16664000	24.3978	24.2862	23.5785	23.2636	23.6405	23.6042	23.886	23.8627	23.9902	3	3	3	A0A087WV73	NOP2		YES	YES		YES	YES		YES		5	A0A087WV73	NOP2	YES
19103000	19120000	14424000	13243000	9877800	14066000	17708000	19980000	20946000	24.1873	24.1886	23.782	23.6587	23.2358	23.7457	24.0779	24.2521	24.3202	3	3	3	O00567	NOP56		YES	YES		YES	YES	YES	YES	YES	7	O00567	NOP56
33090000	19551000	19281000	23445000	22761000	22117000	21940000	21619000	20153000	24.9799	24.2207	24.2007	24.4828	24.4401	24.3987	24.3871	24.3658	24.2645	3	3	3	Q9Y2X3	NOP58		YES	YES		YES	YES	YES	YES	YES	7	Q9Y2X3	NOP58	YES
30769000	31606000	29301000	21131000	17383000	26645000	25948000	27637000	32572000	24.875	24.9137	24.8044	24.3329	24.0512	24.6674	24.6291	24.7201	24.9571	3	3	3	P06748	NPM1		YES	YES		YES	YES	YES		YES	6	P06748	NPM1			YES
2887000	4014200	4556600	3981900	2465300	3128900	5184500	4984400	6988100	21.4611	21.9367	22.1195	21.925	21.2333	21.5772	22.3058	22.249	22.7365	3	3	3	I3L0N3	NSF						YES				1	I3L0N3	NSF
3976900	7181900	6118700	4660600	4421200	4122300	6258500	6236800	6460300	21.9232	22.7759	22.5448	22.1521	22.076	21.975	22.5774	22.5724	22.6232	3	3	3	Q08J23	NSUN2		YES	YES		YES	YES	YES		YES	6	Q08J23	NSUN2	YES
5585400	7940200	4455100	5030400	4033400	4948200	4826700	5131700	5228700	22.4132	22.9207	22.087	22.2622	21.9436	22.2385	22.2026	22.291	22.318	3	3	3	Q5TDF0	NTPCR		YES	YES							2	Q5TDF0	NTPCR
	2537700	2047100	2173700		2417600	2054000	2468600	1553000		21.2751	20.9652	21.0517		21.2051	20.97	21.2353	20.5666	2	2	3	Q9Y266	NUDC									YES	1	Q9Y266	NUDC
3893700	3628800	4657000	4473900	3754500	5035600	6409100	3170500	4557000	21.8927	21.7911	22.151	22.0931	21.8402	22.2637	22.6117	21.5963	22.1197	3	3	3	O43809	NUDT21		YES	YES		YES			YES		4	O43809	NUDT21
7205100	9579000	8387200	8200300	14805000	11318000	3482800	3344300	3540400	22.7806	23.1914	22.9998	22.9672	23.8196	23.4321	21.7318	21.6733	21.7555	3	3	3	Q7Z417	NUFIP2	X	YES	YES		YES	YES			YES	5	Q7Z417	NUFIP2
8434900	9648100	7216700	5335700	5821900	5179600	9335400	11647000	12159000	23.0079	23.2018	22.7829	22.3472	22.4731	22.3044	23.1543	23.4735	23.5355	3	3	3	Q14980	NUMA1											Q14980	NUMA1
1996000	1484200		1811700		1929500	2945700	1974900	4028500	20.9287	20.5013		20.7889		20.8798	21.4902	20.9133	21.9418	2	2	3	P57740	NUP107									YES	1	P57740	NUP107
2426500	1648900	2084900	1699400		2420200	2817400	3009000	2694000	21.2104	20.6531	20.9915	20.6966		21.2067	21.4259	21.5209	21.3613	3	2	3	P49790	NUP153											P49790	NUP153
3603600	4040400	4723000	5745400	4251700	4015700	7511600	7447300	6256400	21.781	21.9461	22.1713	22.454	22.0196	21.9372	22.8407	22.8283	22.5769	3	3	3	E9PF10	NUP155	X										E9PF10	NUP155
1216800		1550300	1282100		1161600	1408900	2493400	1633500	20.2147		20.5641	20.2901		20.1477	20.4261	21.2497	20.6395	2	2	3	Q92621	NUP205									YES	1	Q92621	NUP205
51192000	45050000	50434000	43344000	43104000	53419000	69627000	66024000	74420000	25.6094	25.425	25.5879	25.3693	25.3613	25.6708	26.0531	25.9765	26.1492	3	3	3	Q8TEM1	NUP210											Q8TEM1	NUP210
2070000	1253700	2484700	1871600		2317700	3365100	2527700	4915900	20.9812	20.2578	21.2446	20.8358		21.1443	21.6822	21.2694	22.229	3	2	3	Q9UKX7	NUP50									YES	1	Q9UKX7	NUP50
5104000	3850500	5985400	5739600	6750800	7411200	6799300	9118600	8348300	22.2832	21.8766	22.513	22.4525	22.6866	22.8213	22.697	23.1204	22.9931	3	3	3	Q8N1F7	NUP93									YES	1	Q8N1F7	NUP93
1420500	1520400	1680600	3433900	6890400	6742500	566780	886260	858960	20.438	20.536	20.6805	21.7114	22.7162	22.6849	19.1124	19.7574	19.7122	3	3	3	E9PIN3	NXF1	X	YES	YES		YES					3	E9PIN3	NXF1
3874500	4441600	3317200	2039600	1539400	1413700	1364200	1673600		21.8856	22.0826	21.6615	20.9599	20.5539	20.431	20.3796	20.6745		3	3	2	P04181	OAT	X								YES	1	P04181	OAT
4127000	3844400	2742100	2186800	2475400	2418700	2550300	2454600	2466400	21.9767	21.8743	21.3868	21.0604	21.2392	21.2058	21.2822	21.2271	21.234	3	3	3	A0A0D9SFS3	OGDH											A0A0D9SFS3	OGDH
8735600	6640700	8650200	4969300	4861800	5913000	8939000	7920400	7404100	23.0585	22.6629	23.0443	22.2446	22.2131	22.4955	23.0917	22.9171	22.8199	3	3	3	P55809	OXCT1											P55809	OXCT1
21154000	17702000	44525000	20305000	21668000	22167000	25559000	28254000	26121000	24.3344	24.0774	25.4081	24.2753	24.3691	24.4019	24.6073	24.752	24.6387	3	3	3	P07237	P4HB		YES	YES		YES	YES			YES	5	P07237	P4HB
16097000	16341000	23433000	15967000	15706000	14208000	23855000	24073000	22335000	23.9403	23.962	24.482	23.9286	23.9048	23.7602	24.5078	24.5209	24.4128	3	3	3	Q9UQ80	PA2G4			YES		YES		YES		YES	4	Q9UQ80	PA2G4
57249000	84783000	84552000	80791000	95253000	95544000	84835000	71826000	84342000	25.7707	26.3373	26.3333	26.2677	26.5053	26.5097	26.3382	26.098	26.3297	3	3	3	P11940	PABPC1		YES	YES		YES	YES		YES	YES	6	P11940	PABPC1
9794600	14967000	5952200	12516000	12347000	13592000	8167300	9351400	8711600	23.2236	23.8353	22.505	23.5773	23.5577	23.6963	22.9614	23.1568	23.0545	3	3	3	B1ANR0	PABPC4		YES	YES		YES	YES		YES		5	B1ANR0	PABPC4
5037200	4394800	7147500	5627300		4905000	7158400	8364400	7403500	22.2642	22.0674	22.769	22.424		22.2258	22.7712	22.9958	22.8198	3	2	3	Q15102	PAFAH1B3			YES						YES	2	Q15102	PAFAH1B3
38873000	37813000	35513000	44341000	32364000	39721000	54798000	55407000	51938000	25.2123	25.1724	25.0818	25.4021	24.9479	25.2434	25.7076	25.7236	25.6303	3	3	3	P22234	PAICS	X		YES						YES	2	P22234	PAICS
7915300	7763300	13936000	8860300	7866600	9126600	13236000	14594000	12013000	22.9162	22.8882	23.7323	23.0789	22.9073	23.1216	23.658	23.7989	23.5181	3	3	3	Q13177	PAK2									YES	1	Q13177	PAK2
2618000	2948700	11407000	2945300	2667800	2697800	2362200	2100000	4134500	21.32	21.4916	23.4434	21.49	21.3472	21.3634	21.1717	21.002	21.9793	3	3	3	Q99497	PARK7						YES			YES	2	Q99497	PARK7
33936000	42118000	34142000	36782000	32452000	40041000	46277000	47366000	53922000	25.0163	25.3279	25.025	25.1325	24.9518	25.255	25.4638	25.4973	25.6844	3	3	3	P09874	PARP1		YES			YES				YES	3	P09874	PARP1			YES
168870000	163900000	146120000	723840	363020	789440	1867800	57087	108350	27.3313	27.2882	27.1226	19.4653	18.4697	19.5905	20.8329	15.8009	16.7253	3	3	3	P11498	PC	X		YES						YES	2	P11498	PC
90310000	74412000	91010000	82818000	89905000	85294000	84956000	86043000	81488000	26.4284	26.149	26.4395	26.3034	26.4219	26.3459	26.3402	26.3586	26.2801	3	3	3	Q15365	PCBP1		YES	YES	YES	YES	YES	YES	YES	YES	8	Q15365	PCBP1
29797000	29232000	32991000	36424000	30339000	34168000	35729000	37168000	35949000	24.8287	24.801	24.9756	25.1184	24.8547	25.0261	25.0906	25.1476	25.0994	3	3	3	H3BRU6	PCBP2		YES	YES	YES	YES	YES	YES	YES		7	H3BRU6	PCBP2
121290000	126860000	55901000	21385000	15472000	18909000	21405000	26875000	22854000	26.8539	26.9187	25.7364	24.3501	23.8832	24.1726	24.3514	24.6798	24.4459	3	3	3	P12004	PCNA	X								YES	1	P12004	PCNA
4179900	3492400	1906300	833630		1079200	1953800	1533700	1793900	21.995	21.7358	20.8623	19.669		20.0415	20.8979	20.5486	20.7747	3	2	3	Q14690	PDCD11		YES			YES	YES	YES		YES	5	Q14690	PDCD11
1561700	1242400	2344300	1514700		1804300	1803800	1804900		20.5747	20.2447	21.1607	20.5306		20.783	20.7826	20.7835		3	2	2	O14737	PDCD5											O14737	PDCD5
3223300	3243100	4966200	4420700	3087600	3759100	3965300	4105800	5004000	21.6201	21.6289	22.2437	22.0758	21.5581	21.842	21.919	21.9692	22.2547	3	3	3	Q8WUM4	PDCD6IP						YES			YES	2	Q8WUM4	PDCD6IP
5188000	4803100	2901900	2888300	3225300	2923300	3261800	3692200	3321200	22.3067	22.1955	21.4686	21.4618	21.621	21.4792	21.6372	21.816	21.6633	3	3	3	F6T1Q0	PDE12											F6T1Q0	PDE12
12252000	10382000	8604000	2957500	4409100	3115900	2155100	2266300	2572700	23.5465	23.3076	23.0366	21.4959	22.0721	21.5712	21.0393	21.1119	21.2949	3	3	3	P11177	PDHB	X								YES	1	P11177	PDHB
41277000	35712000	61822000	43988000	35796000	43799000	52136000	53821000	55083000	25.2988	25.0899	25.8816	25.3906	25.0933	25.3844	25.6358	25.6817	25.7151	3	3	3	P30101	PDIA3			YES		YES	YES			YES	4	P30101	PDIA3
10368000	10482000	20513000	13086000	11004000	13104000	17202000	19933000	12909000	23.3056	23.3214	24.29	23.6415	23.3915	23.6435	24.0361	24.2487	23.6219	3	3	3	P13667	PDIA4					YES				YES	2	P13667	PDIA4
10618000	15787000	23145000	16864000	7377300	13474000	18387000	18961000	18144000	23.34	23.9122	24.4642	24.0074	22.8147	23.6837	24.1322	24.1765	24.113	3	3	3	Q15084	PDIA6									YES	1	Q15084	PDIA6
4172500	3456500	3020200	2880500	4958300	4019600	4565300	5456100	5069500	21.9925	21.7209	21.5262	21.4579	22.2414	21.9386	22.1223	22.3794	22.2734	3	3	3	Q29RF7	PDS5A						YES			YES	2	Q29RF7	PDS5A			YES
7653600	8133000	13803000	8095600	12075000	5439100	6622600	9085500	7712600	22.8677	22.9554	23.7185	22.9487	23.5255	22.3749	22.659	23.1151	22.8788	3	3	3	P30086	PEBP1			YES		YES	YES			YES	4	P30086	PEBP1
3847900	4708700	2563100	2889600	4069500	4393000	4844300	5220200	7367000	21.8756	22.1669	21.2895	21.4624	21.9564	22.0668	22.2079	22.3157	22.8126	3	3	3	O15067	PFAS									YES	1	O15067	PFAS
11952000	13251000	13936000	12822000	9140800	12515000	17385000	16244000	19376000	23.5107	23.6596	23.7323	23.6121	23.1239	23.5772	24.0513	23.9534	24.2078	3	3	3	Q01813	PFKP											Q01813	PFKP
30750000	53202000	112610000	42274000	38969000	41140000	37182000	38995000	44778000	24.8741	25.665	26.7468	25.3333	25.2158	25.294	25.1481	25.2168	25.4163	3	3	3	P07737	PFN1		YES	YES						YES	3	P07737	PFN1
11326000	17024000	35192000	31063000	11302000	15560000	24354000	25514000	27022000	23.4331	24.0211	25.0687	24.8887	23.4301	23.8913	24.5377	24.6048	24.6876	3	3	3	P18669	PGAM1									YES	1	P18669	PGAM1
3534600	3519400	5190700	10984000	4105400		5742500	7589300	4188000	21.7531	21.7469	22.3075	23.3889	21.9691		22.4532	22.8555	21.9978	3	2	3	Q96HS1	PGAM5											Q96HS1	PGAM5
24137000	23830000	20552000	19095000	17794000	22558000	27791000	29108000	33630000	24.5247	24.5063	24.2928	24.1867	24.0849	24.4271	24.7281	24.7949	25.0032	3	3	3	P52209	PGD									YES	1	P52209	PGD
93277000	103100000	171500000	124330000	75207000	94785000	143390000	149080000	159960000	26.475	26.6195	27.3536	26.8896	26.1644	26.4982	27.0954	27.1515	27.2531	3	3	3	P00558	PGK1									YES	1	P00558	PGK1
5042700	5553900	5047300	4346200	2897600	4809800	5697000	6580800	5421700	22.2658	22.4051	22.2671	22.0513	21.4664	22.1975	22.4418	22.6498	22.3703	3	3	3	O95336	PGLS											O95336	PGLS
14056000	18568000	28735000	25192000	14500000	17429000	20563000	24498000	21625000	23.7447	24.1463	24.7763	24.5865	23.7895	24.055	24.2935	24.5462	24.3662	3	3	3	P35232	PHB									YES	1	P35232	PHB
26979000	24148000	35341000	25890000	21657000	28440000	41712000	35331000	35489000	24.6853	24.5254	25.0748	24.6259	24.3683	24.7614	25.314	25.0744	25.0809	3	3	3	J3KPX7	PHB2											J3KPX7	PHB2
37615000	41634000	28770000	36457000	32384000	37920000	52719000	53500000	47464000	25.1648	25.3113	24.7781	25.1197	24.9488	25.1765	25.6518	25.673	25.5003	3	3	3	O43175	PHGDH						YES			YES	2	O43175	PHGDH
5048000	3986100	2783200	6648100	5439000	6521100	3083600	5162900	2673900	22.2673	21.9265	21.4083	22.6645	22.3749	22.6367	21.5562	22.2998	21.3505	3	3	3	P12273	PIP											P12273	PIP
4152700	5102900	2429900	2460700	2309100	2388100	2675300	2186800	2590800	21.9856	22.2829	21.2125	21.2306	21.1389	21.1874	21.3513	21.0604	21.305	3	3	3	Q5JRX3	PITRM1									YES	1	Q5JRX3	PITRM1
253520000	302770000	391140000	336090000	282570000	299040000	392930000	403280000	476310000	27.9175	28.1736	28.5431	28.3243	28.074	28.1558	28.5497	28.5872	28.8273	3	3	3	P14618	PKM			YES		YES				YES	3	P14618	PKM
17980000	79948000	11818000	26694000	27396000	15467000	19410000	27713000	5405700	24.0999	26.2526	23.4945	24.67	24.7075	23.8827	24.2103	24.7241	22.3661	3	3	3	Q13835	PKP1											Q13835	PKP1
	2382300	1971900	1959600		2128100	2433600	2428900	3179300		21.1839	20.9112	20.9021		21.0211	21.2147	21.2119	21.6003	2	2	3	P19174	PLCG1									YES	1	P19174	PLCG1
3875700	3283600	2446000	3730700		3566600	3566100	4132900	4741300	21.886	21.6468	21.222	21.831		21.7661	21.7659	21.9787	22.1769	3	2	3	P53350	PLK1									YES	1	P53350	PLK1
18796000	15958000	15247000	9568100	9697100	10109000	6282700	5972700	6287300	24.1639	23.9278	23.862	23.1898	23.2091	23.2691	22.583	22.51	22.584	3	3	3	O75439	PMPCB	X								YES	1	O75439	PMPCB
7022200	7806100	6273000	7456500	7172600	8272700	5824700	6787700	11203000	22.7435	22.8962	22.5807	22.8301	22.7741	22.9799	22.4738	22.6945	23.4174	3	3	3	Q9H307	PNN		YES	YES		YES		YES	YES	YES	6	Q9H307	PNN
6627300	4872700	4664800	6104100	5608600	7607200	5556300	6637700	6943700	22.66	22.2163	22.1534	22.5413	22.4192	22.8589	22.4057	22.6623	22.7273	3	3	3	P00491	PNP											P00491	PNP
10106000	10848000	7102100	5575300	5495000	7419200	6863400	7218200	7058500	23.2687	23.3709	22.7598	22.4106	22.3897	22.8228	22.7105	22.7832	22.7509	3	3	3	Q8TCS8	PNPT1		YES								1	Q8TCS8	PNPT1
1745100	4996800	1552400	1638600	2075100		1274700	1869800	902610	20.7349	22.2526	20.5661	20.644	20.9847		20.2817	20.8345	19.7837	3	2	3	Q8WVV4	POF1B											Q8WVV4	POF1B
8194300	8980500	6281600	7329400	6183800	7782700	7372800	7645900	8479000	22.9662	23.0984	22.5827	22.8053	22.5601	22.8918	22.8138	22.8663	23.0155	3	3	3	F6VRR5	POLDIP3		YES	YES		YES	YES	YES	YES		6	F6VRR5	POLDIP3
2581700	3561200	1298900	1838400	1823400	1735500	2253900	3020400	2244900	21.2999	21.7639	20.3089	20.81	20.7982	20.7269	21.104	21.5263	21.0982	3	3	3	C9J2Y9	POLR2B		YES	YES		YES		YES	YES		5	C9J2Y9	POLR2B
3228800	4483300	5895900	5550300	1816200	4777700	3736300	5718800	5113700	21.6226	22.0961	22.4913	22.4041	20.7925	22.1879	21.8332	22.4473	22.2859	3	3	3	Q15181	PPA1									YES	1	Q15181	PPA1
29530000	68944000	94715000	45079000	31238000	33451000	60569000	56326000	62442000	24.8157	26.0389	26.4971	25.426	24.8968	24.9955	25.8521	25.7473	25.896	3	3	3	PPIA_HUMAN	PPIA		YES	YES		YES					3	PPIA_HUMAN	PPIA
11873000	16502000	12820000	21580000	12075000	15026000	17849000	20394000	18028000	23.5012	23.9761	23.6119	24.3632	23.5255	23.841	24.0893	24.2816	24.1037	3	3	3	P23284	PPIB		YES			YES	YES				3	P23284	PPIB
	2882800	1832000	2674300	5055000	4129800	2177600	2001900	2163000		21.459	20.805	21.3507	22.2693	21.9776	21.0543	20.9329	21.0446	2	3	3	C9JN15	PPIG		YES	YES		YES		YES			4	C9JN15	PPIG
3414400	3672200	4426600	3348400		5120800	5244700	4870500	5945400	21.7032	21.8082	22.0778	21.675		22.2879	22.3224	22.2156	22.5033	3	2	3	O15355	PPM1G									YES	1	O15355	PPM1G
3351400	6956200	7375800	5449900		6657500	7071800	7033400	5984500	21.6763	22.7299	22.8144	22.3778		22.6665	22.7536	22.7458	22.5128	3	2	3	P62136	PPP1CA									YES	1	P62136	PPP1CA
	921930	1864100	1422000		1024400	2088300	1405300	1802100		19.8143	20.83	20.4395		19.9663	20.9939	20.4224	20.7812	2	2	3	F8VR82	PPP1CC		YES								1	F8VR82	PPP1CC
3209700	5028300	5306300	3433500		4331600	6131200	4534900	7080000	21.614	22.2616	22.3393	21.7112		22.0465	22.5477	22.1126	22.7553	3	2	3	P30153	PPP2R1A									YES	1	P30153	PPP2R1A
35945000	46478000	96239000	41342000	36118000	42960000	64259000	59195000	52584000	25.0993	25.47	26.5201	25.3011	25.1062	25.3565	25.9374	25.819	25.6481	3	3	3	PRDX1_HUMAN	PRDX1		YES	YES		YES	YES				4	PRDX1_HUMAN	PRDX1
2549700	3559300	1799600	4006900	3497500	2515800	2424500	2062100	1862500	21.2819	21.7632	20.7792	21.9341	21.7379	21.2626	21.2093	20.9757	20.8288	3	3	3	P32119	PRDX2											P32119	PRDX2
5433700	10253000	8683700	6312500	2950500	3162900	5633700	5992000	7452100	22.3735	23.2895	23.0499	22.5898	21.4925	21.5928	22.4257	22.5146	22.8292	3	3	3	P30048	PRDX3			YES							1	P30048	PRDX3
7656400	7411300	7358200	5757600	4131000	5044700	4406900	5712300	5050300	22.8682	22.8213	22.8109	22.457	21.9781	22.2663	22.0713	22.4456	22.2679	3	3	3	P30044	PRDX5									YES	1	P30044	PRDX5
8187200	8970400	6455600	10992000	6821900	5781600	7265700	6441200	5372200	22.9649	23.0967	22.6221	23.39	22.7017	22.463	22.7927	22.6189	22.3571	3	3	3	P30041	PRDX6									YES	1	P30041	PRDX6
956660	1198100	1594000	1159500		1429000	2282300	1178800	2353900	19.8676	20.1923	20.6042	20.1451		20.4466	21.1221	20.1689	21.1666	3	2	3	P48147	PREP									YES	1	P48147	PREP
7045400	8379200	11713000	8606300	8730700	8710700	10985000	10701000	13022000	22.7483	22.9984	23.4816	23.037	23.0577	23.0544	23.389	23.3512	23.6344	3	3	3	P17252	PRKCA											P17252	PRKCA
2533700	2781700	11149000	4321700	3057900	2945800	3367200	4193000	3276200	21.2728	21.4075	23.4104	22.0432	21.5441	21.4902	21.6831	21.9996	21.6436	3	3	3	K7ELL7	PRKCSH											K7ELL7	PRKCSH
42594000	40628000	38233000	41212000	37829000	47906000	53475000	59039000	59405000	25.3441	25.276	25.1883	25.2966	25.173	25.5137	25.6724	25.8152	25.8241	3	3	3	P78527	PRKDC		YES	YES				YES	YES	YES	5	P78527	PRKDC		YES	YES
6518800	7126400	8609700	11086000	10840000	8735400	8887000	9020600	11278000	22.6362	22.7647	23.0375	23.4022	23.3699	23.0584	23.0833	23.1048	23.427	3	3	3	E9PKG1	PRMT1		YES	YES							2	E9PKG1	PRMT1
3364600	2670900	4099200	4166300	3078600	2955900	3128600	3922400	4497000	21.682	21.3489	21.9669	21.9903	21.5538	21.4952	21.5771	21.9033	22.1005	3	3	3	O14744	PRMT5									YES	1	O14744	PRMT5
34996000	40996000	32219000	53713000	38435000	44499000	35169000	36833000	42583000	25.0607	25.289	24.9414	25.6788	25.1959	25.4073	25.0678	25.1345	25.3438	3	3	3	Q9UMS4	PRPF19									YES	1	Q9UMS4	PRPF19
3486700	3031900	2879700	3051100		1771100	4256400	3147200	4120900	21.7334	21.5318	21.4575	21.5409		20.7562	22.0212	21.5856	21.9745	3	2	3	E7EVX8	PRPF31		YES			YES					2	E7EVX8	PRPF31
4504400	2103600	3244900	2458200	6366800	5645400	2589700	2901800	4994100	22.1029	21.0044	21.6297	21.2292	22.6021	22.4286	21.3044	21.4685	22.2518	3	3	3	O75400	PRPF40A		YES						YES	YES	3	O75400	PRPF40A
5128700	4402900	4263800	4943500	4864200	4752200	7583300	6170300	6067500	22.2902	22.07	22.0237	22.2371	22.2138	22.1802	22.8544	22.5569	22.5327	3	3	3	O94906	PRPF6					YES				YES	2	O94906	PRPF6
12149000	9160400	8606300	8134000	11103000	10512000	11432000	11110000	11661000	23.5343	23.127	23.037	22.9555	23.4044	23.3255	23.4466	23.4054	23.4752	3	3	3	Q6P2Q9	PRPF8		YES			YES		YES		YES	4	Q6P2Q9	PRPF8
4781100	3641300	4689700	4279500		3953400	5789400	4583600	4753100	22.1889	21.796	22.1611	22.029		21.9147	22.465	22.128	22.1804	3	2	3	P11908	PRPS2											P11908	PRPS2
13855000	13800000	17485000	25389000	50793000	41923000	2591700	2399400	2687700	23.7239	23.7182	24.0596	24.5977	25.5981	25.3212	21.3055	21.1942	21.3579	3	3	3	P48634	PRRC2A	X	YES	YES		YES			YES	YES	5	P48634	PRRC2A		YES (Bat2)
20308000	9470500	10241000	36171000	43502000	41014000	2667300	2918300	3084600	24.2755	23.175	23.2879	25.1083	25.3746	25.2896	21.3469	21.4767	21.5567	3	3	3	E7EPN9	PRRC2C	X	YES	YES		YES	YES		YES		5	E7EPN9	PRRC2C
4329700	2286700	4748500	4701500	2349800	2851700	3532200	4937900	3995400	22.0458	21.1248	22.179	22.1647	21.1641	21.4434	21.7521	22.2355	21.9299	3	3	3	Q9Y617	PSAT1									YES	1	Q9Y617	PSAT1
13403000	15611000	15696000	13939000	14690000	17154000	12833000	12691000	15141000	23.6761	23.8961	23.9039	23.7326	23.8083	24.032	23.6134	23.5973	23.852	3	3	3	P25786	PSMA1											P25786	PSMA1
3445100	2736000	3023600	2765000	4083700		3624500	3618600	2991800	21.7161	21.3836	21.5278	21.3988	21.9614		21.7894	21.787	21.5126	3	2	3	A0A024RA52	PSMA2											A0A024RA52	PSMA2
7677400	7170100	6287000	9397900	7237400	7441900	5324400	7455800	6534400	22.8722	22.7736	22.5839	23.1639	22.787	22.8272	22.3442	22.8299	22.6396	3	3	3	P25788	PSMA3											P25788	PSMA3
5540500	5409600	6891100	6801400	5058400	6016300	6589900	7045000	5565500	22.4016	22.3671	22.7163	22.6974	22.2702	22.5204	22.6518	22.7482	22.4081	3	3	3	P25789	PSMA4						YES				1	P25789	PSMA4
4658500	4598400	6553600	7938500	4387900	3560500	4671700	4928300	6756200	22.1514	22.1327	22.6439	22.9204	22.0651	21.7636	22.1555	22.2327	22.6878	3	3	3	P28066	PSMA5											P28066	PSMA5
10038000	6927300	16719000	7348200	11284000	9112000	8144800	9783100	8735500	23.259	22.7239	23.995	22.809	23.4278	23.1193	22.9574	23.2219	23.0585	3	3	3	G3V295	PSMA6											G3V295	PSMA6
21235000	22886000	15443000	24877000	19792000	21873000	24126000	27145000	21548000	24.3399	24.448	23.8804	24.5683	24.2384	24.3826	24.5241	24.6942	24.3611	3	3	3	O14818	PSMA7											O14818	PSMA7
1993000	2928900	3684600	2877500	2522000	4331200	3515700	4985400	3184200	20.9265	21.4819	21.8131	21.4564	21.2661	22.0463	21.7454	22.2493	21.6025	3	3	3	P20618	PSMB1			YES							1	P20618	PSMB1
3565900	5477300	1983000	5680100	3393700	3304600	5812700	5088200	7049600	21.7658	22.385	20.9193	22.4375	21.6944	21.656	22.4708	22.2787	22.7491	3	3	3	P49721	PSMB2											P49721	PSMB2
4157100	2497500	1194700		3129600	6345600	5636500	5447700	4171400	21.9871	21.2521	20.1882		21.5775	22.5973	22.4264	22.3772	21.9921	3	2	3	A0A087WUL2	PSMB3											A0A087WUL2	PSMB3
4639300	3351200	4556600	4552000	5283100	6090500	4404400	4511200	4342900	22.1455	21.6762	22.1195	22.1181	22.333	22.5381	22.0705	22.1051	22.0502	3	3	3	P28070	PSMB4											P28070	PSMB4
3298300	3425700	3254100	4417000	4624200	4955400	3190000	4184400	3637700	21.6533	21.708	21.6338	22.0746	22.1408	22.2406	21.6051	21.9966	21.7946	3	3	3	P28074	PSMB5											P28074	PSMB5
3969400	3155800	5585600	4338400	4938200	3305100	6989600	5214800	6369900	21.9205	21.5896	22.4133	22.0487	22.2356	21.6563	22.7368	22.3142	22.6028	3	3	3	P62191	PSMC1					YES				YES	2	P62191	PSMC1
12083000	9714000	11700000	9439100	6025700	8087500	13471000	13031000	11651000	23.5265	23.2116	23.48	23.1702	22.5227	22.9473	23.6834	23.6354	23.474	3	3	3	P35998	PSMC2						YES			YES	2	P35998	PSMC2
6682100	6206500	7342400	6660000	3523300	5961500	5858700	7507800	8195000	22.6719	22.5653	22.8078	22.6671	21.7485	22.5072	22.4821	22.84	22.9663	3	3	3	J3QQM1	PSMC5											J3QQM1	PSMC5
	1425100	2062900	1289100		1835600	1509500	1613400	1621200		20.4426	20.9762	20.2979		20.8078	20.5256	20.6217	20.6286	2	2	3	A0A087X2I1	PSMC6											A0A087X2I1	PSMC6
2395600	4178000	3996000	2657800	4781200	6545900	7361800	5054900	5771200	21.192	21.9944	21.9301	21.3418	22.1889	22.6422	22.8116	22.2693	22.4604	3	3	3	A0A087WW66	PSMD1											A0A087WW66	PSMD1
5406900	4911700	10328000	5910300	3840900	5041400	9362100	10717000	9501900	22.3664	22.2278	23.3001	22.4948	21.873	22.2654	23.1584	23.3534	23.1798	3	3	3	O00231	PSMD11											O00231	PSMD11
3769600	3589200	3736700	3631600	4406200	3939500	4920900	5177900	4903000	21.846	21.7752	21.8333	21.7922	22.0711	21.9096	22.2305	22.3039	22.2252	3	3	3	Q9UNM6	PSMD13											Q9UNM6	PSMD13
2904400	5859200	6833800	6050000	2851600	4562500	8983100	9339300	8088700	21.4698	22.4823	22.7043	22.5285	21.4433	22.1214	23.0988	23.1549	22.9475	3	3	3	Q13200	PSMD2									YES	1	Q13200	PSMD2
8868000	9206300	8352100	10976000	7804900	10456000	9637600	11738000	12034000	23.0802	23.1342	22.9937	23.3878	22.8959	23.3178	23.2002	23.4847	23.5206	3	3	3	O43242	PSMD3											O43242	PSMD3
5002800	1261200	3321200	1460100	2117000		3242100	2797700	3047400	22.2543	20.2664	21.6633	20.4776	21.0136		21.6285	21.4158	21.5391	3	2	3	P51665	PSMD7									YES	1	P51665	PSMD7
6959100	5304100	9617800	6936100	4393200	5810900	8145200	8479400	7618900	22.7305	22.3387	23.1973	22.7257	22.0668	22.4703	22.9575	23.0155	22.8612	3	3	3	Q06323	PSME1											Q06323	PSME1
	2999000	2945000	2548200		2069800	2183800	2198600	2368400		21.5161	21.4898	21.281		20.9811	21.0584	21.0682	21.1755	2	2	3	K7ENH2	PSME3											K7ENH2	PSME3
24265000	28676000	33991000	30390000	30095000	24924000	35419000	40798000	42019000	24.5324	24.7733	25.0186	24.8571	24.843	24.571	25.078	25.282	25.3245	3	3	3	A0A0U1RRM4	PTBP1		YES	YES	YES	YES	YES	YES	YES		7	A0A0U1RRM4	PTBP1	YES	YES
6804800	3203100	3781800	2959700	2946600	3865900	3134500	3370600	2769900	22.6981	21.611	21.8506	21.497	21.4906	21.8824	21.5798	21.6846	21.4014	3	3	3	Q96EY7	PTCD3		YES	YES		YES	YES		YES	YES	6	Q96EY7	PTCD3
2076300	1907500	2600100	2290900		2050100	2357400	3144600	2538700	20.9856	20.8633	21.3101	21.1275		20.9673	21.1688	21.5844	21.2757	3	2	3	A0A087WYT3	PTGES3											A0A087WYT3	PTGES3
3488900	3686900	2400800	2653100	2022100	3131200	4770000	4192200	5141000	21.7343	21.814	21.1951	21.3392	20.9474	21.5783	22.1856	21.9993	22.2936	3	3	3	P29350	PTPN6											P29350	PTPN6
13944000	15485000	23538000	15864000	13646000	16436000	26571000	25463000	28348000	23.7331	23.8844	24.4885	23.9193	23.702	23.9704	24.6633	24.6019	24.7567	3	3	3	X6R433	PTPRC											X6R433	PTPRC
8085600	6996900	9345600	7843400	6487900	5643100	7526800	9875700	9873700	22.9469	22.7383	23.1559	22.903	22.6293	22.4281	22.8436	23.2355	23.2352	3	3	3	A0A0J9YVR6	PUF60		YES	YES	YES	YES	YES	YES	YES		7	A0A0J9YVR6	PUF60
3978300	6037600	4405900	3709700	3141400	3350500	3286400	3611400	4128600	21.9237	22.5255	22.071	21.8229	21.583	21.6759	21.6481	21.7841	21.9772	3	3	3	Q96C36	PYCR2											Q96C36	PYCR2
3259800	2642300	7386400	4428700	3940500	5491500	8883000	7006200	8965300	21.6364	21.3334	22.8164	22.0785	21.9099	22.3888	23.0826	22.7402	23.0959	3	3	3	P47897	QARS									YES	1	P47897	QARS
25541000	19840000	36261000	26202000	21055000	25025000	31080000	38684000	36591000	24.6063	24.2419	25.1119	24.6432	24.3277	24.5769	24.8895	25.2052	25.125	3	3	3	Q15907	RAB11B											Q15907	RAB11B
7820600	9431600	9567100	12233000	8274600	10589000	12476000	12592000	13731000	22.8988	23.1691	23.1897	23.5443	22.9803	23.3361	23.5727	23.586	23.7109	3	3	3	P61106	RAB14									YES	1	P61106	RAB14
20146000	20582000	24010000	15480000	17574000	19269000	27010000	28428000	33089000	24.264	24.2949	24.5171	23.8839	24.0669	24.1998	24.687	24.7608	24.9798	3	3	3	Q9H0U4	RAB1B									YES	1	Q9H0U4	RAB1B
8030100	5242300	3413200	7172900	4594200	7147600	7272300	7034300	8255700	22.937	22.3218	21.7027	22.7741	22.1314	22.769	22.794	22.746	22.977	3	3	3	P61019	RAB2A											P61019	RAB2A
8476000	10772000	8807600	9323700	8720500	11654000	14573000	12823000	13449000	23.015	23.3608	23.0703	23.1525	23.056	23.4743	23.7968	23.6122	23.681	3	3	3	P51148	RAB5C									YES	1	P51148	RAB5C
16890000	18922000	14232000	19049000	17426000	13391000	23006000	23717000	21972000	24.0097	24.1736	23.7626	24.1832	24.0547	23.6748	24.4555	24.4994	24.3892	3	3	3	P20340	RAB6A											P20340	RAB6A
21308000	21968000	20632000	24933000	21003000	24307000	29311000	27952000	31491000	24.3449	24.3889	24.2984	24.5716	24.3241	24.5349	24.8049	24.7364	24.9084	3	3	3	P51149	RAB7A											P51149	RAB7A
4231700	4374000	5463900	7460100	5424500	5886700	7112200	6525200	6996800	22.0128	22.0605	22.3815	22.8308	22.3711	22.489	22.7619	22.6376	22.7383	3	3	3	P61006	RAB8A											P61006	RAB8A
3498800		4081200	3531000	4582700		4341700	4451800		21.7384		21.9606	21.7516	22.1278		22.0498	22.086		2	2	2	P63000	RAC1											P63000	RAC1
50020000	34200000	66997000	39293000	37685000	43045000	49903000	54347000	50329000	25.576	25.0275	25.9976	25.2278	25.1675	25.3593	25.5726	25.6957	25.5849	3	3	3	P15153	RAC2											P15153	RAC2
16835000	19014000	21805000	17026000	18086000	19316000	17216000	11974000	14733000	24.005	24.1806	24.3782	24.0212	24.1084	24.2033	24.0372	23.5134	23.8125	3	3	3	Q5QPL9	RALY		YES	YES		YES	YES	YES	YES		6	Q5QPL9	RALY
90708000	72390000	95000000	96358000	123450000	106560000	74168000	79850000	65962000	26.4347	26.1093	26.5014	26.5219	26.8794	26.6671	26.1443	26.2508	25.9751	3	3	3	B5MDF5	RAN		YES	YES		YES					3	B5MDF5	RAN	YES		YES
5638600	4369500	5366500	4633200	7781300	7497500	6262100	6762600	6866800	22.4269	22.059	22.3556	22.1436	22.8916	22.838	22.5782	22.6891	22.7112	3	3	3	P49792	RANBP2						YES			YES	2	P49792	RANBP2
1230700	1638800	1468900	1479800		1444500	1538500	1406100	1689000	20.231	20.6442	20.4863	20.497		20.4621	20.5531	20.4233	20.6877	3	2	3	Q96S59	RANBP9									YES	1	Q96S59	RANBP9
7307600	7405500	13109000	8015500	7126400	8339100	9192800	11490000	9423600	22.801	22.8202	23.6441	22.9344	22.7647	22.9915	23.1321	23.4539	23.1678	3	3	3	E7ESV4	RAP1B											E7ESV4	RAP1B
17006000	12352000	13597000	16998000	11579000	12694000	21448000	21788000	22236000	24.0195	23.5582	23.6968	24.0189	23.465	23.5976	24.3543	24.377	24.4064	3	3	3	P54136	RARS									YES	1	P54136	RARS	YES
4289200	4496000	3988800	3782900		4395400	5556400	5483200	5782300	22.0323	22.1002	21.9275	21.8511		22.0676	22.4057	22.3866	22.4632	3	2	3	Q86YV0	RASAL3											Q86YV0	RASAL3
5160800	3831500	4342300	4901500	4534500	4113300	5892700	6355300	4781900	22.2992	21.8695	22.05	22.2248	22.1125	21.9719	22.4905	22.5995	22.1892	3	3	3	P06400	RB1											P06400	RB1
8073400	5636700	10405000	4144600	4551400	7507800	4998100	5992000	6767500	22.9447	22.4264	23.3108	21.9828	22.1179	22.84	22.2529	22.5146	22.6902	3	3	3	Q09028	RBBP4									YES	1	Q09028	RBBP4
4953400	7739600	5579000	10188000	9853600	11999000	4254500	3578500	2435700	22.24	22.8838	22.4116	23.2804	23.2322	23.5164	22.0206	21.7709	21.2159	3	3	3	Q7Z6E9	RBBP6	X	YES					YES	YES	YES	4	Q7Z6E9	RBBP6
1799500	945450	873920	1699100	1927900	1802000	1551700	1426300	1435300	20.7792	19.8506	19.7371	20.6963	20.8786	20.7812	20.5654	20.4438	20.4529	3	3	3	Q9NTZ6	RBM12		YES	YES		YES			YES	YES	5	Q9NTZ6	RBM12
23339000	15751000	15870000	20537000	25056000	24428000	16573000	17148000	17945000	24.4762	23.9089	23.9198	24.2917	24.5787	24.542	23.9823	24.0315	24.0971	3	3	3	Q96PK6	RBM14		YES	YES		YES	YES	YES	YES	YES	7	Q96PK6	RBM14
21851000	18518000	16220000	21879000	27747000	25505000	18251000	17909000	21835000	24.3812	24.1424	23.9513	24.383	24.7258	24.6043	24.1215	24.0942	24.3801	3	3	3	A0A0U1RQH7	RBM39		YES	YES	YES	YES	YES	YES	YES		7	A0A0U1RQH7	RBM39
68135000	62899000	61334000	67357000	105790000	82295000	33822000	31253000	36129000	26.0219	25.9065	25.8702	26.0053	26.6566	26.2943	25.0115	24.8975	25.1067	3	3	3	P38159	RBMX	X	YES	YES		YES	YES	YES	YES	YES	7	P38159	RBMX	YES
19536000	16279000	16734000	19916000	22193000	19230000	17898000	19003000	19306000	24.2196	23.9565	23.9963	24.2474	24.4036	24.1969	24.0933	24.1797	24.2025	3	3	3	P18754	RCC1									YES	1	P18754	RCC1
21259000	19932000	21120000	22600000	20674000	17241000	20834000	18867000	20352000	24.3416	24.2486	24.3321	24.4298	24.3013	24.0393	24.3124	24.1694	24.2787	3	3	3	Q9P258	RCC2		YES	YES		YES				YES	4	Q9P258	RCC2
	2217900	2914200	3719900		3632700	4312000	4039600	4696400		21.0808	21.4747	21.8268		21.7926	22.0399	21.9458	22.1631	2	2	3	Q8TC12	RDH11											Q8TC12	RDH11
28314000	17954000	16969000	17710000	22607000	24066000	18187000	22002000	16129000	24.755	24.0978	24.0164	24.0781	24.4303	24.5205	24.1164	24.3911	23.9432	3	3	3	P04618	Rev											P04618	Rev
1612400	1457000	1798300	2069600		1282500	2806200	3546000	2736700	20.6208	20.4746	20.7782	20.9809		20.2905	21.4202	21.7578	21.384	3	2	3	P35249	RFC4	X										P35249	RFC4
1997300	1910000	1512300	2739700	4545200	2519300	2013000	1944400	2413700	20.9296	20.8651	20.5283	21.3856	22.1159	21.2646	20.9409	20.8909	21.2028	3	3	3	B5MDE0	RFT1											B5MDE0	RFT1
2491000	2174500	2264700	1936200	1929800	2882000	5045900	4590500	4970800	21.2483	21.0523	21.1109	20.8848	20.88	21.4586	22.2667	22.1302	22.245	3	3	3	P61586	RHOA	X										P61586	RHOA
8736700	4757100	10255000	5630300	5312800	4566200	5869900	8869200	9703600	23.0587	22.1817	23.2898	22.4248	22.341	22.1226	22.4849	23.0804	23.2101	3	3	3	P84095	RHOG											P84095	RHOG
1836200	2435900	3161300	2600800		1843200	1874200	3141900	2679400	20.8083	21.216	21.5921	21.3105		20.8138	20.8378	21.5832	21.3535	3	2	3	O75792	RNASEH2A											O75792	RNASEH2A
13126000	9626900	11723000	9193400	9921400	12703000	13050000	10758000	12205000	23.6459	23.1986	23.4828	23.1322	23.2421	23.5987	23.6375	23.3589	23.541	3	3	3	P13489	RNH1						YES			YES	2	P13489	RNH1
13569000	16423000	13015000	15042000	17305000	13819000	12192000	11566000	13966000	23.6938	23.9692	23.6337	23.8425	24.0447	23.7201	23.5394	23.4634	23.7354	3	3	3	H3BPG5	RNPS1		YES			YES		YES	YES		4	H3BPG5	RNPS1
13478000	11283000	11134000	13548000	11430000	13596000	13522000	10374000	11635000	23.6841	23.4276	23.4085	23.6916	23.4463	23.6967	23.6888	23.3065	23.472	3	3	3	P27694	RPA1									YES	1	P27694	RPA1
8324100	7811100	11614000	9520800	7404000	10367000	14585000	16049000	23302000	22.9889	22.8971	23.4694	23.1827	22.8199	23.3055	23.798	23.936	24.474	3	3	3	X1WI28	RPL10	X	YES			YES					2	X1WI28	RPL10
20660000	12308000	25846000	17863000	18453000	18814000	29601000	22339000	24723000	24.3003	23.5531	24.6234	24.0905	24.1374	24.1653	24.8191	24.4131	24.5594	3	3	3	P62906	RPL10A		YES	YES		YES	YES			YES	5	P62906	RPL10A
49774000	59692000	76477000	54746000	49123000	52506000	77650000	67346000	74861000	25.5689	25.831	26.1885	25.7063	25.5499	25.646	26.2105	26.0051	26.1577	3	3	3	P62913	RPL11		YES	YES						YES	3	P62913	RPL11
45304000	41712000	69099000	51334000	34430000	57582000	55030000	64843000	68139000	25.4331	25.314	26.0422	25.6134	25.0372	25.7791	25.7137	25.9504	26.022	3	3	3	P30050	RPL12		YES	YES			YES			YES	4	P30050	RPL12	YES
75566000	46364000	61313000	52814000	71299000	70979000	80046000	83687000	93381000	26.1712	25.4665	25.8697	25.6544	26.0874	26.0809	26.2543	26.3185	26.4766	3	3	3	P26373	RPL13			YES		YES	YES	YES	YES	YES	6	P26373	RPL13	YES
32744000	33949000	26069000	34697000	28324000	37714000	46577000	49421000	47055000	24.9647	25.0169	24.6358	25.0483	24.7555	25.1686	25.4731	25.5586	25.4878	3	3	3	M0QYS1	RPL13A			YES		YES					2	M0QYS1	RPL13A
31114000	26198000	34398000	32434000	30389000	39682000	48291000	53324000	57700000	24.8911	24.643	25.0358	24.951	24.857	25.242	25.5253	25.6683	25.7821	3	3	3	P50914	RPL14	X	YES	YES		YES	YES	YES		YES	6	P50914	RPL14	YES
98001000	74753000	59665000	38201000	53077000	35185000	26026000	28181000	40183000	26.5463	26.1556	25.8304	25.1871	25.6616	25.0685	24.6335	24.7482	25.2601	3	3	3	P61313	RPL15	X	YES	YES		YES	YES	YES		YES	6	P61313	RPL15	YES
31693000	21667000	28620000	17367000	25973000	25056000	31924000	36115000	30722000	24.9177	24.369	24.7705	24.0498	24.6305	24.5787	24.9281	25.1061	24.8728	3	3	3	A0A087WXM6	RPL17		YES				YES				2	A0A087WXM6	RPL17
104370000	94618000	100700000	72536000	75114000	113280000	100030000	120120000	125700000	26.6371	26.4956	26.5855	26.1122	26.1626	26.7553	26.5759	26.8399	26.9054	3	3	3	G3V203	RPL18			YES				YES			2	G3V203	RPL18
45546000	45618000	50371000	50101000	56600000	47648000	57282000	57092000	59195000	25.4408	25.4431	25.5861	25.5783	25.7543	25.5059	25.7716	25.7668	25.819	3	3	3	M0R117	RPL18A		YES	YES		YES	YES				4	M0R117	RPL18A
27222000	21288000	13101000	21483000	22153000	19264000	27050000	28306000	25159000	24.6983	24.3435	23.6432	24.3567	24.401	24.1994	24.6891	24.7546	24.5846	3	3	3	J3QR09	RPL19			YES		YES	YES				3	J3QR09	RPL19
18372000	21121000	19495000	15829000	23424000	17427000	36406000	28255000	39105000	24.131	24.3322	24.2166	23.9161	24.4815	24.0548	25.1177	24.752	25.2208	3	3	3	P46778	RPL21	X	YES	YES		YES	YES			YES	5	P46778	RPL21
42171000	44568000	41343000	45147000	41189000	44629000	37881000	33505000	38331000	25.3297	25.4095	25.3011	25.4281	25.2958	25.4115	25.175	24.9979	25.192	3	3	3	K7ERI7	RPL22		YES	YES		YES		YES	YES		5	K7ERI7	RPL22	YES
28523000	25827000	27303000	30448000	20634000	32640000	39003000	30590000	36344000	24.7656	24.6224	24.7026	24.8598	24.2985	24.9601	25.2171	24.8666	25.1152	3	3	3	P62829	RPL23			YES		YES	YES			YES	4	P62829	RPL23
54496000	42073000	77046000	51213000	33623000	46329000	77386000	84537000	90066000	25.6996	25.3264	26.1992	25.61	25.0029	25.4654	26.2056	26.3331	26.4245	3	3	3	P62750	RPL23A		YES	YES		YES	YES	YES		YES	6	P62750	RPL23A	YES
21422000	15174000	15018000	14853000	18044000	17443000	29804000	24280000	29343000	24.3526	23.8551	23.8402	23.8243	24.105	24.0561	24.829	24.5333	24.8065	3	3	3	C9JXB8	RPL24		YES	YES		YES	YES				4	C9JXB8	RPL24	YES
18687000	14591000	25108000	16813000	15860000	23292000	22258000	22365000	23978000	24.1555	23.7986	24.5816	24.0031	23.9189	24.4733	24.4078	24.4147	24.5152	3	3	3	P61254	RPL26		YES							YES	2	P61254	RPL26
26390000	25218000	29181000	26167000	25340000	26307000	43711000	30553000	40569000	24.6535	24.588	24.7985	24.6412	24.5949	24.6489	25.3815	24.8648	25.2739	3	3	3	P61353	RPL27		YES	YES		YES				YES	4	P61353	RPL27
31402000	23764000	20098000	36658000	23607000	23421000	28344000	29689000	31750000	24.9044	24.5023	24.2605	25.1276	24.4927	24.4813	24.7565	24.8234	24.9203	3	3	3	E9PJD9	RPL27A		YES	YES			YES				3	E9PJD9	RPL27A	YES
30172000	23470000	19043000	18706000	24520000	27303000	36392000	31074000	35692000	24.8467	24.4843	24.1828	24.157	24.5475	24.7026	25.1171	24.8892	25.0891	3	3	3	P46779	RPL28			YES		YES	YES			YES	4	P46779	RPL28
240760000	155420000	127850000	133210000	159880000	121920000	50618000	50328000	53882000	27.843	27.2116	26.9299	26.9891	27.2524	26.8614	25.5931	25.5849	25.6833	3	3	3	P47914	RPL29	X	YES	YES		YES		YES	YES	YES	6	P47914	RPL29	YES
37128000	27469000	38851000	37744000	36503000	32437000	46358000	39104000	47042000	25.146	24.7113	25.2114	25.1697	25.1215	24.9511	25.4663	25.2208	25.4874	3	3	3	P39023	RPL3		YES	YES		YES	YES	YES		YES	6	P39023	RPL3	YES	YES
20377000	14542000	23871000	24853000	14967000	20272000	23670000	26231000	27554000	24.2804	23.7937	24.5088	24.5669	23.8353	24.273	24.4966	24.6448	24.7158	3	3	3	E5RI99	RPL30		YES	YES		YES	YES				4	E5RI99	RPL30
41402000	34415000	22900000	26460000	28722000	31043000	29383000	27126000	42296000	25.3032	25.0365	24.4488	24.6573	24.7757	24.8878	24.8085	24.6932	25.334	3	3	3	H7C2W9	RPL31			YES		YES	YES	YES	YES		5	H7C2W9	RPL31
16592000	17608000	14704000	7389100	11453000	17385000	11782000	8758700	14479000	23.984	24.0697	23.8097	22.817	23.4492	24.0513	23.4901	23.0623	23.7875	3	3	3	D3YTB1	RPL32					YES	YES				2	D3YTB1	RPL32
15543000	18129000	13742000	17870000	21988000	18565000	14162000	15428000	15878000	23.8898	24.1118	23.7121	24.091	24.3902	24.1461	23.7555	23.879	23.9205	3	3	3	P49207	RPL34									YES	1	P49207	RPL34
11326000	8641800	13605000	12368000	11994000	18150000	16103000	20289000	20013000	23.4331	23.0429	23.6976	23.5601	23.5158	24.1135	23.9408	24.2742	24.2544	3	3	3	P18077	RPL35A		YES			YES					2	P18077	RPL35A
12087000	8744400	8839300	10096000	9832900	11839000	11986000	10097000	12282000	23.527	23.0599	23.0755	23.2673	23.2292	23.497	23.5148	23.2674	23.55	3	3	3	Q9Y3U8	RPL36					YES	YES				2	Q9Y3U8	RPL36
8177400	6556300	6360400	7263800		5181500	5226300	5580500	5194200	22.9632	22.6445	22.6007	22.7923		22.3049	22.3174	22.412	22.3085	3	2	3	H0Y5B4	RPL36A		YES								1	H0Y5B4	RPL36A	YES
12695000	13322000	8279300	10595000	10907000	11275000	15701000	19556000	16716000	23.5978	23.6673	22.9811	23.3369	23.3788	23.4266	23.9044	24.2211	23.9947	3	3	3	P61513	RPL37A		YES								1	P61513	RPL37A
2664600	3673900	2009500	2728200	2329900	2626800	4995500	3931100	3048900	21.3455	21.8089	20.9384	21.3795	21.1518	21.3249	22.2522	21.9065	21.5399	3	3	3	P63173	RPL38						YES				1	P63173	RPL38
44781000	40099000	48879000	42762000	35378000	34926000	55569000	50881000	54831000	25.4164	25.2571	25.5427	25.3498	25.0763	25.0578	25.7278	25.6006	25.7085	3	3	3	P36578	RPL4		YES			YES	YES	YES	YES	YES	6	P36578	RPL4	YES
25456000	26520000	47468000	31351000	32286000	34707000	39912000	41442000	35853000	24.6015	24.6606	25.5005	24.902	24.9444	25.0487	25.2503	25.3046	25.0956	3	3	3	P46777	RPL5		YES	YES		YES	YES	YES	YES	YES	7	P46777	RPL5
103610000	107240000	88754000	70796000	76011000	72862000	74005000	102830000	85841000	26.6266	26.6763	26.4033	26.0772	26.1797	26.1187	26.1411	26.6157	26.3552	3	3	3	Q02878	RPL6			YES		YES	YES	YES	YES	YES	6	Q02878	RPL6	YES
64127000	54371000	73979000	41134000	39594000	50931000	66641000	68700000	79555000	25.9344	25.6963	26.1406	25.2938	25.2388	25.602	25.9899	26.0338	26.2454	3	3	3	P18124	RPL7		YES	YES		YES		YES		YES	5	P18124	RPL7	YES
76461000	76049000	57237000	68047000	58779000	65618000	85431000	92139000	107400000	26.1882	26.1804	25.7704	26.02	25.8088	25.9676	26.3483	26.4573	26.6784	3	3	3	P62424	RPL7A		YES	YES		YES	YES	YES		YES	6	P62424	RPL7A	YES
23519000	20631000	60393000	26684000	28641000	40638000	39390000	47628000	47013000	24.4873	24.2983	25.8479	24.6695	24.7716	25.2763	25.2313	25.5053	25.4866	3	3	3	P62917	RPL8		YES	YES		YES		YES	YES	YES	6	P62917	RPL8	YES
37385000	40834000	34372000	37216000	38240000	40707000	51475000	38196000	45783000	25.156	25.2833	25.0347	25.1494	25.1886	25.2788	25.6174	25.1869	25.4483	3	3	3	D6RAN4	RPL9											D6RAN4	RPL9
34497000	47232000	66554000	56250000	37866000	51021000	67197000	66790000	77799000	25.04	25.4933	25.988	25.7453	25.1744	25.6046	26.0019	25.9931	26.2132	3	3	3	P05388	RPLP0		YES	YES		YES				YES	4	P05388	RPLP0	YES
1647400	1561700	3819900	1990600		1146200	2773200	4280600	3618500	20.6518	20.5747	21.8651	20.9248		20.1284	21.4031	22.0294	21.787	3	2	3	P05387	RPLP2	X					YES			YES	2	P05387	RPLP2
38874000	39670000	48621000	46778000	36144000	37440000	57811000	57444000	58991000	25.2123	25.2415	25.5351	25.4793	25.1073	25.1581	25.7848	25.7757	25.814	3	3	3	P04843	RPN1			YES		YES	YES				3	P04843	RPN1
75221000	54476000	60197000	113360000	127960000	96182000	52313000	54334000	57712000	26.1646	25.6991	25.8432	26.7563	26.9311	26.5193	25.6407	25.6954	25.7824	3	3	3	P04844	RPN2											P04844	RPN2
11194000	11014000	21848000	17375000	9432500	14109000	13858000	16864000	13150000	23.4162	23.3928	24.381	24.0505	23.1692	23.7501	23.7242	24.0074	23.6486	3	3	3	P46783	RPS10		YES	YES		YES	YES		YES	YES	6	P46783	RPS10	YES
47640000	42219000	68450000	39050000	35062000	48137000	65697000	75030000	64651000	25.5057	25.3314	26.0285	25.2188	25.0634	25.5206	25.9693	26.161	25.9462	3	3	3	P62280	RPS11			YES		YES				YES	3	P62280	RPS11
4543500	6504900	17548000	5848100	3590500	4424800	8045900	9434800	7771000	22.1154	22.6331	24.0648	22.4795	21.7758	22.0772	22.9398	23.1696	22.8897	3	3	3	P25398	RPS12		YES	YES		YES	YES			YES	5	P25398	RPS12
23301000	15576000	37787000	16916000	20263000	24478000	35779000	29952000	24401000	24.4739	23.8928	25.1714	24.0119	24.2723	24.545	25.0926	24.8361	24.5404	3	3	3	P62277	RPS13		YES	YES			YES			YES	4	P62277	RPS13	YES
49277000	37576000	48994000	36513000	32374000	35650000	30517000	24883000	33702000	25.5544	25.1633	25.5461	25.1219	24.9483	25.0874	24.8631	24.5687	25.0063	3	3	3	P62263	RPS14		YES	YES			YES		YES	YES	5	P62263	RPS14	YES
19380000	24244000	21966000	26240000	12556000	21251000	35476000	26480000	32750000	24.2081	24.5311	24.3888	24.6453	23.5819	24.341	25.0803	24.6584	24.965	3	3	3	I3L3P7	RPS15A		YES	YES		YES					3	I3L3P7	RPS15A
27179000	34820000	42831000	32495000	22816000	32295000	63228000	49604000	49119000	24.696	25.0534	25.3522	24.9537	24.4435	24.9448	25.9141	25.564	25.5498	3	3	3	P62249	RPS16		YES	YES			YES	YES		YES	5	P62249	RPS16	YES
4513100	7002500	5525500	10810000	5313200	4094100	9323600	9742000	12594000	22.1057	22.7394	22.3977	23.3659	22.3411	21.9651	23.1525	23.2158	23.5862	3	3	3	P08708	RPS17	X	YES			YES				YES	3	P08708	RPS17
13202000	21163000	34409000	18508000	16479000	17920000	30098000	30811000	29776000	23.6543	24.335	25.0363	24.1416	23.9741	24.0951	24.8432	24.8769	24.8276	3	3	3	P62269	RPS18		YES			YES			YES	YES	4	P62269	RPS18	YES
8212000	8123700	10008000	10622000	4712800	8424100	10966000	10787000	9990000	22.9693	22.9537	23.2547	23.3406	22.1682	23.0061	23.3865	23.3628	23.2521	3	3	3	P39019	RPS19		YES	YES			YES			YES	4	P39019	RPS19
37503000	57056000	65726000	49754000	38149000	49321000	65655000	61585000	70346000	25.1605	25.7659	25.97	25.5683	25.1851	25.5557	25.9684	25.8761	26.068	3	3	3	P15880	RPS2		YES	YES		YES	YES	YES		YES	6	P15880	RPS2
12263000	20096000	33791000	20864000	11043000	16697000	25428000	21049000	25135000	23.5478	24.2604	25.0101	24.3145	23.3966	23.9931	24.5999	24.3272	24.5832	3	3	3	P60866	RPS20		YES	YES		YES	YES			YES	5	P60866	RPS20
11503000	9858800	19435000	12278000	7991700	10712000	17667000	17268000	15265000	23.4555	23.233	24.2122	23.5496	22.9301	23.3527	24.0746	24.0416	23.8637	3	3	3	P62266	RPS23		YES	YES			YES			YES	4	P62266	RPS23
21830000	26422000	11693000	17558000	13980000	16651000	23094000	29935000	21732000	24.3798	24.6552	23.4791	24.0656	23.7369	23.9891	24.461	24.8353	24.3733	3	3	3	E7ETK0	RPS24		YES	YES		YES	YES				4	E7ETK0	RPS24
23943000	16825000	13209000	24337000	10232000	18949000	27139000	25838000	31849000	24.5131	24.0041	23.655	24.5366	23.2866	24.1756	24.6939	24.623	24.9247	3	3	3	P62851	RPS25		YES	YES						YES	3	P62851	RPS25
11961000	10306000	20677000	10135000	7670100	8105200	14946000	13215000	11638000	23.5118	23.297	24.3015	23.2728	22.8708	22.9504	23.8333	23.6557	23.4723	3	3	3	P42677	RPS27		YES	YES			YES				3	P42677	RPS27
363980000	369960000	243410000	249470000	331550000	391530000	478220000	418980000	450270000	28.4393	28.4628	27.8588	27.8943	28.3047	28.5445	28.8331	28.6423	28.7462	3	3	3	RS27A_HUMAN	RPS27A		YES			YES					2	RS27A_HUMAN	RPS27A
151890000	152650000	146870000	173090000	132140000	146260000	181730000	190040000	199340000	27.1785	27.1857	27.13	27.3669	26.9775	27.124	27.4372	27.5017	27.5707	3	3	3	P23396	RPS3		YES	YES		YES	YES		YES	YES	6	P23396	RPS3	YES
44145000	36218000	54949000	41299000	36279000	43443000	54529000	54684000	61192000	25.3957	25.1102	25.7116	25.2996	25.1126	25.3726	25.7005	25.7046	25.8668	3	3	3	P61247	RPS3A		YES	YES		YES	YES			YES	5	P61247	RPS3A	YES
46100000	44506000	56480000	47426000	39269000	54929000	77990000	71570000	84679000	25.4583	25.4075	25.7512	25.4992	25.2269	25.7111	26.2168	26.0929	26.3355	3	3	3	P62701	RPS4X	X	YES			YES				YES	3	P62701	RPS4X	YES
9683100	9751900	23596000	14056000	12163000	13467000	17067000	17880000	17216000	23.207	23.2173	24.492	23.7447	23.536	23.6829	24.0247	24.0918	24.0372	3	3	3	M0R0F0	RPS5		YES	YES		YES	YES				4	M0R0F0	RPS5
53613000	65893000	52998000	62415000	48119000	55867000	69056000	72255000	73119000	25.6761	25.9736	25.6594	25.8954	25.5201	25.7355	26.0413	26.1066	26.1237	3	3	3	P62753	RPS6			YES		YES	YES	YES		YES	5	P62753	RPS6
8688400	9442500	19289000	10088000	12809000	10811000	19380000	18460000	19414000	23.0507	23.1707	24.2013	23.2661	23.6107	23.366	24.2081	24.1379	24.2106	3	3	3	P62081	RPS7		YES	YES		YES				YES	4	P62081	RPS7	YES
112080000	112550000	102200000	110550000	106870000	124350000	163180000	162180000	183940000	26.74	26.746	26.6068	26.7201	26.6713	26.8898	27.2819	27.273	27.4547	3	3	3	P62241	RPS8	X	YES	YES		YES	YES	YES	YES	YES	7	P62241	RPS8	YES
42600000	32848000	49278000	36682000	31599000	43801000	61158000	59910000	62293000	25.3444	24.9693	25.5544	25.1286	24.9134	25.3845	25.866	25.8363	25.8926	3	3	3	A0A024R4M0	RPS9			YES		YES	YES				3	A0A024R4M0	RPS9
27923000	26450000	49694000	35394000	24205000	30445000	31969000	35634000	33522000	24.735	24.6568	25.5666	25.077	24.5288	24.8597	24.9302	25.0868	24.9986	3	3	3	C9J9K3	RPSA		YES								1	C9J9K3	RPSA
13341000	10100000	3685900	11017000	13137000	11385000	5174000	5385300	4172200	23.6694	23.2679	21.8136	23.3932	23.6471	23.4406	22.3028	22.3606	21.9924	3	3	3	A0A0A0MRV0	RRBP1	X	YES	YES							2	A0A0A0MRV0	RRBP1
2099800	1085400	2198800	2235700		1623800		2374400	2668700	21.0018	20.0498	21.0683	21.0923		20.6309		21.1791	21.3477	3	2	2	P31350	RRM2											P31350	RRM2
12323000	12128000	8068200	5533600	6872000	7282900	8557100	9225100	9757000	23.5549	23.5318	22.9438	22.3998	22.7123	22.7961	23.0287	23.1371	23.218	3	3	3	O76021	RSL1D1		YES	YES		YES	YES	YES	YES	YES	7	O76021	RSL1D1
7792500	8302200	10007000	5787000	8595400	8138500	8819100	8544200	9931900	22.8937	22.9851	23.2545	22.4644	23.0351	22.9563	23.0722	23.0265	23.2436	3	3	3	Q9Y3I0	RTCB		YES	YES		YES	YES		YES	YES	6	Q9Y3I0	RTCB
4353900	7099600	8539800	16878000	8034500	13704000	10607000	11864000	14830000	22.0539	22.7593	23.0258	24.0086	22.9378	23.7081	23.3385	23.5001	23.822	3	3	3	F8W914	RTN4			YES		YES					2	F8W914	RTN4
15179000	14200000	18187000	17498000	10815000	16944000	21935000	20750000	21584000	23.8556	23.7594	24.1164	24.0607	23.3665	24.0143	24.3867	24.3066	24.3635	3	3	3	Q9Y265	RUVBL1									YES	1	Q9Y265	RUVBL1	YES
20918000	23899000	22442000	24569000	18896000	24008000	27981000	25385000	27696000	24.3182	24.5104	24.4197	24.5503	24.1716	24.517	24.7379	24.5975	24.7232	3	3	3	Q9Y230	RUVBL2									YES	1	Q9Y230	RUVBL2
25393000	24457000	27053000	34012000	34373000	35607000	25590000	12146000	9199000	24.5979	24.5437	24.6893	25.0195	25.0348	25.0857	24.6091	23.534	23.133	3	3	3	P05109	S100A8											P05109	S100A8
3207800	2932800	3416300	6289100	4027900	3505700	2674600	2553800	1640200	21.6132	21.4838	21.704	22.5844	21.9416	21.7413	21.3509	21.2842	20.6454	3	3	3	P06702	S100A9								YES		1	P06702	S100A9
	2299100	4165400	3451500		3327200	5569500	3898700	4560800		21.1326	21.99	21.7188		21.6659	22.4091	21.8946	22.1209	2	2	3	Q9NTJ5	SACM1L									YES	1	Q9NTJ5	SACM1L
30306000	29729000	29839000	38426000	64206000	56062000	13133000	14954000	17104000	24.8531	24.8254	24.8307	25.1956	25.9362	25.7405	23.6467	23.834	24.0278	3	3	3	Q15424	SAFB	X	YES	YES		YES	YES	YES	YES	YES	7	Q15424	SAFB
1956800	1340400	1276400	2328900		2271500	1571200	2879000	1682400	20.9001	20.3542	20.2836	21.1512		21.1152	20.5834	21.4571	20.6821	3	2	3	Q9Y512	SAMM50											Q9Y512	SAMM50
2831300	2886100	1857000	2943500	1774400	2639500	3203400	3889300	3740700	21.433	21.4607	20.8245	21.4891	20.7589	21.3318	21.6112	21.8911	21.8349	3	3	3	Q9NR31	SAR1A											Q9NR31	SAR1A
6192900	4379200	8447700	5227800	7463100	6473900	6058400	6425000	5244300	22.5622	22.0622	23.0101	22.3178	22.8313	22.6262	22.5305	22.6153	22.3223	3	3	3	P82979	SARNP		YES	YES		YES		YES	YES		5	P82979	SARNP
5718500	3089600	3036200	1716100	1720100	2194100	1650200	1572600	1462000	22.4472	21.559	21.5338	20.7107	20.7141	21.0652	20.6542	20.5847	20.4795	3	3	3	M0QWZ7	SARS2	X	YES								1	M0QWZ7	SARS2
3847300	3419400	4109300	3956500	3874700	3985300	4059300	5540900	5996300	21.8754	21.7053	21.9705	21.9158	21.8857	21.9263	21.9528	22.4017	22.5156	3	3	3	O43290	SART1		YES			YES	YES			YES	4	O43290	SART1
14699000	19026000	10157000	20893000	25184000	23495000	12656000	10755000	16828000	23.8092	24.1815	23.276	24.3165	24.586	24.4859	23.5933	23.3585	24.0044	3	3	3	O14828	SCAMP3						YES			YES	2	O14828	SCAMP3
4718200	6173000	4638600	5946900	6559200	5915900	9958400	9106900	10858000	22.1698	22.5575	22.1453	22.5037	22.6451	22.4962	23.2475	23.1185	23.3723	3	3	3	Q8NBX0	SCCPDH	X										Q8NBX0	SCCPDH
9374800	12496000	8510100	8274700	7320500	9411000	7180400	8739400	8540100	23.1604	23.575	23.0207	22.9803	22.8035	23.1659	22.7756	23.0591	23.0258	3	3	3	P31040	SDHA									YES	1	P31040	SDHA
2933600	3307600	2671000	1884600	1456100	1850200	2798200	2120400	3359700	21.4842	21.6574	21.3489	20.8458	20.4737	20.8192	21.4161	21.0159	21.6799	3	3	3	P21912	SDHB											P21912	SDHB
8725000	9741700	8047900	10257000	7331000	9667500	10821000	10795000	10235000	23.0567	23.2157	22.9402	23.2901	22.8056	23.2047	23.3673	23.3639	23.287	3	3	3	O75396	SEC22B											O75396	SEC22B
4157400	2558700	3187200	2875500	3969600	3749700	4400000	4731200	4730600	21.9873	21.287	21.6039	21.4554	21.9206	21.8383	22.0691	22.1738	22.1736	3	3	3	G5EA31	SEC24C											G5EA31	SEC24C
	2215000	3742700	1445900	1957000	2087900	3463600	3559200	2668500		21.0789	21.8356	20.4635	20.9002	20.9936	21.7238	21.7631	21.3476	2	3	3	B4DR61	SEC61A1			YES							1	B4DR61	SEC61A1
27041000	37827000	33762000	25182000	32705000	27911000	32050000	33428000	35073000	24.6886	25.1729	25.0089	24.5859	24.963	24.7343	24.9338	24.9946	25.0639	3	3	3	J3KNL2	Septin-1											J3KNL2	Septin-1
3968800	3918800	4083700	4334300	4904300	4836900	5546800	5793200	6594000	21.9203	21.902	21.9614	22.0474	22.2256	22.2057	22.4032	22.4659	22.6527	3	3	3	B5MCX3	Septin-2	X										B5MCX3	Septin-2
8324000	10838000	9413300	8654200	6478300	6737600	10600000	9184400	11228000	22.9888	23.3696	23.1663	23.045	22.6272	22.6838	23.3376	23.1308	23.4206	3	3	3	B1AMS2	Septin-6											B1AMS2	Septin-6
6260500	6639000	9810500	6387400	4626400	5509100	11900000	9261500	10176000	22.5778	22.6625	23.2259	22.6068	22.1415	22.3934	23.5045	23.1428	23.2787	3	3	3	E7ES33	Septin-7											E7ES33	Septin-7
6824100	6798500	13411000	7354200	4386300	5971300	11021000	10549000	9861500	22.7022	22.6968	23.6769	22.8101	22.0646	22.5096	23.3938	23.3306	23.2334	3	3	3	K7EL40	Septin-9											K7EL40	Septin-9
16516000	15679000	13540000	10408000	13059000	16838000	14313000	15948000	16182000	23.9774	23.9023	23.6907	23.3112	23.6385	24.0052	23.7708	23.9269	23.9479	3	3	3	Q8NC51	SERBP1		YES	YES		YES	YES		YES	YES	6	Q8NC51	SERBP1
33523000	25730000	20670000	29244000	45628000	27565000	10980000	19869000	11644000	24.9986	24.6169	24.301	24.8016	25.4434	24.7163	23.3884	24.244	23.4731	3	3	3	Q96P63	SERPINB12											Q96P63	SERPINB12
5637800	6608700	4157100	11701000	6561200	5904300	4283300	14605000	1976800	22.4267	22.6559	21.9871	23.4801	22.6455	22.4933	22.0303	23.8	20.9147	3	3	3	P29508	SERPINB3											P29508	SERPINB3
7411400	9578300	11791000	10830000	8737700	9534100	10575000	11401000	13546000	22.8213	23.1913	23.4912	23.3685	23.0588	23.1847	23.3342	23.4427	23.6914	3	3	3	Q15459	SF3A1		YES	YES		YES				YES	4	Q15459	SF3A1
4099500	3971900	9885900	5493300	4778500	4648600	7157900	6807400	5719300	21.967	21.9214	23.2369	22.3892	22.1881	22.1484	22.7711	22.6987	22.4474	3	3	3	Q12874	SF3A3		YES	YES		YES		YES	YES		5	Q12874	SF3A3
9317600	6982400	5366300	11936000	9853100	11020000	12102000	11806000	9268200	23.1515	22.7353	22.3555	23.5088	23.2321	23.3936	23.5287	23.493	23.1439	3	3	3	O75533	SF3B1		YES	YES		YES	YES	YES	YES	YES	7	O75533	SF3B1
12004000	13239000	12618000	13039000	11689000	14341000	22127000	21152000	21935000	23.517	23.6583	23.589	23.6363	23.4786	23.7736	24.3993	24.3343	24.3867	3	3	3	A0A087WZZ5	SF3B2	X	YES	YES		YES					3	A0A087WZZ5	SF3B2
30681000	23139000	31947000	28159000	25845000	30744000	41763000	41975000	43196000	24.8708	24.4638	24.9292	24.7471	24.6234	24.8738	25.3157	25.323	25.3644	3	3	3	Q15393	SF3B3									YES	1	Q15393	SF3B3
32442000	29150000	33705000	30985000	37073000	40021000	24709000	23747000	22414000	24.9514	24.797	25.0065	24.8851	25.1439	25.2543	24.5585	24.5012	24.4179	3	3	3	P23246	SFPQ		YES	YES		YES	YES	YES	YES	YES	7	P23246	SFPQ	YES	YES	YES
14966000	19968000	18545000	19021000	12309000	16186000	23362000	24594000	24663000	23.8352	24.2512	24.1445	24.1811	23.5532	23.9482	24.4777	24.5518	24.5558	3	3	3	Q9H9B4	SFXN1											Q9H9B4	SFXN1
79049000	78662000	59770000	46979000	44799000	53674000	49404000	45955000	47597000	26.2362	26.2292	25.8329	25.4855	25.417	25.6777	25.5581	25.4537	25.5044	3	3	3	P34897	SHMT2									YES	1	P34897	SHMT2
1542400	1158700		917420	1144100		1341100	2071000	1456300	20.5567	20.1441		19.8072	20.1258		20.355	20.9819	20.4739	2	2	3	A0A087WXW3	SIT1											A0A087WXW3	SIT1
2550200	3600600	2427400	1977700	2573200	2861800	3965700	3627100	4237900	21.2822	21.7798	21.211	20.9154	21.2951	21.4485	21.9191	21.7904	22.0149	3	3	3	P42285	SKIV2L2			YES		YES			YES	YES	4	P42285	SKIV2L2
3127700		888610	2711800		2470300	2027900	1440800	3754200	21.5767		19.7612	21.3708		21.2363	20.9516	20.4584	21.8401	2	2	3	Q15758	SLC1A5											Q15758	SLC1A5
20241000	15551000	11558000	16719000	16302000	19455000	22861000	26809000	23509000	24.2708	23.8905	23.4624	23.995	23.9585	24.2136	24.4464	24.6762	24.4867	3	3	3	I3L1P8	SLC25A11		YES								1	I3L1P8	SLC25A11
59390000	26058000	53720000	36467000	36531000	37521000	69992000	58848000	59712000	25.8237	24.6352	25.679	25.1201	25.1226	25.1612	26.0607	25.8105	25.8315	3	3	3	Q00325	SLC25A3									YES	1	Q00325	SLC25A3	YES
84946000	99421000	87879000	84530000	89033000	82082000	87489000	85220000	94169000	26.34	26.567	26.389	26.333	26.4078	26.2906	26.3826	26.3447	26.4887	3	3	3	P05141	SLC25A5			YES		YES					2	P05141	SLC25A5
14139000	14045000	12758000	12774000		15780000	12968000	12478000	18345000	23.7532	23.7436	23.6049	23.6067		23.9116	23.6285	23.5729	24.1289	3	2	3	P12236	SLC25A6											P12236	SLC25A6
7755200	12909000	13230000	18347000	5581400	8310100	20642000	17777000	20735000	22.8867	23.6219	23.6573	24.129	22.4122	22.9864	24.2991	24.0835	24.3056	3	3	3	F5GZS6	SLC3A2					YES					1	F5GZS6	SLC3A2
6353500		8051100	6462900	8175600	7825100	9966700	10673000	7965400	22.5991		22.9408	22.6238	22.9629	22.8997	23.2487	23.3475	22.9253	2	3	3	Q01650	SLC7A5											Q01650	SLC7A5
2899100	4367900	6824600	3856500	4200800	3930200	6073400	5553300	5280700	21.4672	22.0585	22.7023	21.8789	22.0022	21.9062	22.5341	22.4049	22.3323	3	3	3	O14745	SLC9A3R1											O14745	SLC9A3R1
6307700	6723200	8915600	5279000	9709400	6548800	4385600	4085000	4196900	22.5887	22.6807	23.0879	22.3318	23.211	22.6428	22.0643	21.9619	22.0009	3	3	3	Q9GZT3	SLIRP	X	YES	YES		YES	YES		YES	YES	6	Q9GZT3	SLIRP
23674000	16377000	18908000	52309000	80108000	61727000	3776400	4528800	4917900	24.4968	23.9652	24.1725	25.6406	26.2554	25.8794	21.8486	22.1107	22.2296	3	3	3	Q9NWH9	SLTM	X	YES	YES		YES	YES	YES	YES	YES	7	Q9NWH9	SLTM
2989300	3079400	4079300	2332200	2665900	1753700	3986800	3851600	4703400	21.5114	21.5542	21.9599	21.1533	21.3462	20.742	21.9268	21.877	22.1653	3	3	3	A0A0A0MT49	SMARCA4											A0A0A0MT49	SMARCA4			YES
8986400	7785800	6540800	6112700	6824900	9332100	10600000	12949000	11730000	23.0993	22.8924	22.641	22.5434	22.7024	23.1538	23.3376	23.6263	23.4837	3	3	3	O60264	SMARCA5									YES	1	O60264	SMARCA5			YES
1616700	1778200		1801600		1839000	3199900	2126600	3288700	20.6246	20.762		20.7808		20.8105	21.6096	21.0201	21.6491	2	2	3	Q14683	SMC1A		YES							YES	2	Q14683	SMC1A
25222000	28233000	20031000	22141000	21941000	23572000	33521000	35911000	34698000	24.5882	24.7509	24.2557	24.4002	24.3871	24.4906	24.9986	25.0979	25.0483	3	3	3	O95347	SMC2									YES	1	O95347	SMC2
11727000	10072000	8663900	10300000	7604900	9614600	14226000	10632000	12455000	23.4833	23.2638	23.0466	23.2961	22.8585	23.1968	23.762	23.3419	23.5702	3	3	3	Q9NTJ3	SMC4									YES	1	Q9NTJ3	SMC4
5169100	6397100	4349600	6232800	7469300	8460300	6394700	5530300	6348700	22.3015	22.609	22.0525	22.5714	22.8325	23.0123	22.6084	22.3989	22.598	3	3	3	Q2TAY7	SMU1									YES	1	Q2TAY7	SMU1
43519000	40904000	37264000	43062000	45501000	51610000	46577000	45476000	50886000	25.3751	25.2857	25.1513	25.3599	25.4394	25.6211	25.4731	25.4386	25.6008	3	3	3	Q7KZF4	SND1		YES	YES		YES	YES		YES	YES	6	Q7KZF4	SND1
19918000	20362000	19408000	20343000	19148000	24040000	25585000	24289000	26683000	24.2476	24.2794	24.2101	24.278	24.1907	24.5189	24.6088	24.5338	24.6694	3	3	3	O75643	SNRNP200		YES			YES				YES	3	O75643	SNRNP200
4749000	4081500	5185700	4788300	5987000	5365600	5568200	5098600	5580900	22.1792	21.9607	22.3061	22.1911	22.5134	22.3553	22.4088	22.2817	22.4121	3	3	3	P08621	SNRNP70		YES	YES	YES	YES				YES	5	P08621	SNRNP70	YES
3924500	4936600	6860600	6545000	4175900	4949100	7666000	7971900	8112700	21.9041	22.2351	22.7099	22.642	21.9937	22.2387	22.87	22.9265	22.9518	3	3	3	P09012	SNRPA		YES	YES						YES	3	P09012	SNRPA	YES
4171600	4259900	4831400	5125600	4278000	5455700	5369200	5237500	5008300	21.9922	22.0224	22.204	22.2893	22.0285	22.3793	22.3563	22.3204	22.2559	3	3	3	P09661	SNRPA1		YES				YES				2	P09661	SNRPA1
10305000	17267000	9774600	20026000	19694000	18308000	23381000	14696000	23321000	23.2968	24.0415	23.2206	24.2554	24.2313	24.126	24.4788	23.8089	24.4751	3	3	3	P62314	SNRPD1		YES			YES	YES	YES			4	P62314	SNRPD1
16022000	9535800	15232000	19588000	17881000	24047000	10146000	10792000	10070000	23.9336	23.1849	23.8606	24.2235	24.0919	24.5194	23.2744	23.3635	23.2636	3	3	3	P62316	SNRPD2					YES	YES				2	P62316	SNRPD2
21743000	24139000	14111000	31979000	24094000	30725000	16406000	16188000	17920000	24.374	24.5249	23.7503	24.9306	24.5222	24.8729	23.9677	23.9484	24.0951	3	3	3	P62318	SNRPD3		YES				YES	YES			3	P62318	SNRPD3
2278400	2516200	3289000	1944800	2723700		5297100	2676000	1425600	21.1196	21.2628	21.6492	20.8912	21.3771		22.3368	21.3516	20.4431	3	2	3	P62304	SNRPE											P62304	SNRPE
6955800	6565000	4374200	12430000	15329000	10073000	6134400	3589400	6688300	22.7298	22.6464	22.0606	23.5673	23.8698	23.264	22.5485	21.7753	22.6732	3	3	3	J3QLE5	SNRPN											J3QLE5	SNRPN
2242000	2545300	1871700	2383300	2149500	2591200	2473400	2558400	3161200	21.0964	21.2794	20.8359	21.1845	21.0356	21.3052	21.2381	21.2868	21.592	3	3	3	Q13596	SNX1											Q13596	SNX1
12136000	12629000	7415100	14583000	22637000	22629000	7055100	6540800	8540000	23.5328	23.5902	22.822	23.7978	24.4322	24.4317	22.7502	22.641	23.0258	3	3	3	P18583	SON	X	YES	YES		YES		YES		YES	5	P18583	SON
4882000	4247600	4933500	4040000	4370100	5826300	4577600	4734200	5669000	22.219	22.0182	22.2342	21.9459	22.0592	22.4741	22.1262	22.1747	22.4347	3	3	3	Q00796	SORD											Q00796	SORD
1722500	1363100	1713600	2749100	9020200	7067400	1394600	1347400	1437600	20.7161	20.3785	20.7086	21.3905	23.1047	22.7527	20.4114	20.3617	20.4552	3	3	3	Q96T58	SPEN	X	YES	YES		YES	YES	YES	YES	YES	7	Q96T58	SPEN
18485000	9082200	4014600	8854600	13407000	9233100	19341000	26323000	2763800	24.1399	23.1146	21.9368	23.078	23.6765	23.1384	24.2052	24.6498	21.3982	3	3	3	P22528	SPRR1B											P22528	SPRR1B
24471000	11175000	4563600	14812000	28216000	20003000	7082400	9611000	3460000	24.5446	23.4138	22.1217	23.8203	24.75	24.2537	22.7558	23.1963	21.7223	3	3	3	P22531	SPRR2E	X										P22531	SPRR2E
23431000	27716000	49288000	29923000	26048000	32114000	40269000	40380000	47420000	24.4819	24.7242	25.5547	24.8348	24.6347	24.9367	25.2632	25.2671	25.499	3	3	3	Q13813	SPTAN1			YES			YES			YES	3	Q13813	SPTAN1	YES
43182000	39290000	46625000	48533000	36696000	45310000	63975000	63410000	67757000	25.3639	25.2277	25.4746	25.5325	25.1291	25.4333	25.931	25.9182	26.0139	3	3	3	Q01082	SPTBN1	X	YES	YES			YES				3	Q01082	SPTBN1	YES
9082800	5445600	5988300	3831900	5973100	6067000	4583500	5451700	6086600	23.1147	22.3767	22.5137	21.8696	22.51	22.5326	22.128	22.3783	22.5372	3	3	3	Q9Y6N5	SQRDL									YES	1	Q9Y6N5	SQRDL
4900400	5183300	5798700	5998600	4940300	3800200	6559100	6207600	6340200	22.2245	22.3054	22.4673	22.5162	22.2362	21.8576	22.6451	22.5656	22.5961	3	3	3	H0YLA2	SRP14		YES	YES		YES					3	H0YLA2	SRP14
7001400	3822200	5562700	5588900	4155100	6100500	7968700	7726500	7745800	22.7392	21.866	22.4074	22.4141	21.9865	22.5405	22.9259	22.8814	22.885	3	3	3	Q9UHB9	SRP68					YES				YES	2	Q9UHB9	SRP68
2515400	3284600	3616700	2188600		3064800	4875500	5193200	5441800	21.2624	21.6473	21.7862	21.0616		21.5474	22.2171	22.3082	22.3757	3	2	3	O76094	SRP72	X	YES	YES		YES	YES			YES	5	O76094	SRP72
3748200	5191600	6627200	4831400	3808400	3964000	4386800	5232000	5364200	21.8378	22.3077	22.66	22.204	21.8608	21.9185	22.0647	22.3189	22.3549	3	3	3	P49458	SRP9									YES	1	P49458	SRP9
3809300	4140800	3165900	3283500	2465700	3643500	4865300	7136400	5769400	21.8611	21.9815	21.5942	21.6468	21.2336	21.7969	22.2141	22.7668	22.46	3	3	3	Q9Y5M8	SRPRB						YES				1	Q9Y5M8	SRPRB
115480000	90735000	71390000	123670000	208500000	202940000	64031000	59701000	69783000	26.7831	26.4352	26.0892	26.8819	27.6355	27.5965	25.9323	25.8313	26.0564	3	3	3	Q9UQ35	SRRM2	X	YES	YES		YES	YES	YES		YES	6	Q9UQ35	SRRM2
3116800	3508100	2618700	2630200	3253200	3917800	3717700	3901400	3937400	21.5716	21.7423	21.3204	21.3267	21.6334	21.9016	21.826	21.8956	21.9088	3	3	3	Q9BXP5	SRRT		YES	YES		YES		YES	YES	YES	6	Q9BXP5	SRRT
37310000	35802000	29273000	46591000	56855000	61643000	34703000	31159000	34176000	25.1531	25.0935	24.8031	25.4735	25.7608	25.8774	25.0486	24.8931	25.0265	3	3	3	J3KTL2	SRSF1		YES	YES	YES	YES	YES	YES	YES		7	J3KTL2	SRSF1	YES
9050800	6909700	5545000	6854400	13632000	11301000	7134100	9070800	8694000	23.1096	22.7202	22.4028	22.7086	23.7005	23.4299	22.7663	23.1128	23.0516	3	3	3	Q5T760	SRSF11		YES			YES	YES		YES		4	Q5T760	SRSF11
30694000	28384000	23383000	28806000	48618000	39983000	16381000	21466000	21670000	24.8715	24.7586	24.479	24.7799	25.535	25.2529	23.9655	24.3556	24.3692	3	3	3	J3QL05	SRSF2		YES	YES		YES	YES	YES	YES		6	J3QL05	SRSF2
17430000	17729000	19555000	25009000	33857000	28888000	16268000	15789000	17452000	24.0551	24.0796	24.221	24.5759	25.013	24.784	23.9555	23.9124	24.0569	3	3	3	A0A087X2D0	SRSF3		YES	YES	YES	YES	YES	YES	YES		7	A0A087X2D0	SRSF3
20868000	23946000	14532000	26645000	39511000	39159000	13117000	11336000	12953000	24.3148	24.5133	23.7927	24.6674	25.2358	25.2228	23.6449	23.4344	23.6268	3	3	3	Q13247	SRSF6	X	YES	YES	YES	YES	YES	YES	YES	YES	8	Q13247	SRSF6	YES
22105000	20202000	13038000	29660000	42176000	37800000	20341000	25240000	18980000	24.3979	24.268	23.6362	24.822	25.3299	25.1719	24.2779	24.5892	24.178	3	3	3	A0A0B4J1Z1	SRSF7		YES	YES		YES	YES	YES	YES		6	A0A0B4J1Z1	SRSF7
6141300	4859600	6180400	6523800	12580000		3634900	3648600	4565100	22.5501	22.2124	22.5593	22.6373	23.5846		21.7935	21.7989	22.1222	3	2	3	Q13242	SRSF9		YES	YES	YES	YES	YES	YES	YES	YES	8	Q13242	SRSF9
105790000	82139000	81126000	14833000	12827000	21048000	14737000	18936000	15860000	26.6566	26.2916	26.2737	23.8223	23.6127	24.3272	23.8129	24.1746	23.9189	3	3	3	Q04837	SSBP1	X	YES	YES		YES	YES				4	Q04837	SSBP1
2295300	1847500	2463900	2992100	2082800	2591500	3098600	2642200	3270000	21.1303	20.8171	21.2325	21.5127	20.9901	21.3054	21.5632	21.3333	21.6409	3	3	3	C9J3L8	SSR1			YES							1	C9J3L8	SSR1
6040000	14295000	8710200	11903000	11629000	16156000	6759800	6530100	8748500	22.5261	23.769	23.0543	23.5048	23.4712	23.9456	22.6885	22.6387	23.0606	3	3	3	P51571	SSR4											P51571	SSR4
13606000	18863000	13065000	13260000	8502300	13080000	20273000	20142000	21093000	23.6977	24.1691	23.6392	23.6606	23.0194	23.6409	24.2731	24.2637	24.3303	3	3	3	Q08945	SSRP1		YES	YES		YES				YES	4	Q08945	SSRP1	YES
9105300	9311200	9014400	12060000	9986300	10965000	10377000	9371400	8874200	23.1183	23.1505	23.1038	23.5237	23.2515	23.3864	23.3069	23.1598	23.0812	3	3	3	H7C3I1	ST13						YES				1	H7C3I1	ST13
1215900	727330	291640	1854400	9800700	7730800	653360	1290400	792940	20.2136	19.4723	18.1538	20.8225	23.2245	22.8822	19.3175	20.2994	19.5969	3	3	3	G5EA18	STAU2	X	YES	YES		YES			YES		4	G5EA18	STAU2
23939000	31976000	49179000	30400000	20417000	24057000	32863000	33657000	36404000	24.5129	24.9305	25.5515	24.8576	24.2833	24.52	24.97	25.0044	25.1176	3	3	3	P31948	STIP1					YES	YES			YES	3	P31948	STIP1
2414600	1278700	1690500	1643600	1975700	1965300	2491700	2943300	2254900	21.2034	20.2862	20.689	20.6484	20.9139	20.9063	21.2487	21.489	21.1046	3	3	3	Q8NBY1	STK26											Q8NBY1	STK26
	3657400	5860300	2916200	3611200	3720800	4416300	5665600	4445100		21.8024	22.4825	21.4757	21.784	21.8272	22.0744	22.4338	22.0838	2	3	3	A2A2D0	STMN1											A2A2D0	STMN1
7663800	11262000	22482000	14915000	9952300	10342000	20540000	18742000	20153000	22.8696	23.425	24.4223	23.8303	23.2466	23.302	24.2919	24.1598	24.2645	3	3	3	Q9UJZ1	STOML2											Q9UJZ1	STOML2
4763600	6210600	5911300	6690700	4163300	5008100	4379800	5399200	4835800	22.1836	22.5663	22.495	22.6737	21.9893	22.2558	22.0624	22.3643	22.2053	3	3	3	Q9Y3F4	STRAP		YES	YES		YES	YES			YES	5	Q9Y3F4	STRAP
3831100	3109900	2486100	4105300	4419900	9374400		1805500	2300900	21.8693	21.5684	21.2455	21.9691	22.0756	23.1603		20.784	21.1338	3	3	2	Q96SI9	STRBP	X	YES	YES		YES	YES	YES	YES	YES	7	Q96SI9	STRBP
3230200	3328900	2646200	3681600	5137000	3802900	3385900	4487000	4207000	21.6232	21.6666	21.3355	21.8119	22.2925	21.8587	21.6911	22.0973	22.0044	3	3	3	P46977	STT3A											P46977	STT3A
11575000	9745900	6739000	11849000	12770000	12463000	13047000	12926000	12543000	23.4645	23.2164	22.6841	23.4983	23.6063	23.5711	23.6372	23.6238	23.5804	3	3	3	Q8TCJ2	STT3B											Q8TCJ2	STT3B
4717700	5106200	4118400	4339500	3454000	5270800	7402700	6302100	6355300	22.1697	22.2838	21.9737	22.0491	21.7198	22.3296	22.8196	22.5874	22.5995	3	3	3	P53999	SUB1		YES	YES		YES				YES	4	P53999	SUB1	YES
21247000	17652000	14584000	7501500	8675800	9088900	9160000	8085700	7568800	24.3408	24.0733	23.7979	22.8387	23.0486	23.1157	23.1269	22.9469	22.8516	3	3	3	Q9P2R7	SUCLA2	X										Q9P2R7	SUCLA2
13103000	8267900	8419600	3529000	4159000	3961700	4813600	4104800	4160900	23.6434	22.9791	23.0053	21.7508	21.9878	21.9177	22.1987	21.9689	21.9885	3	3	3	P53597	SUCLG1	X				YES	YES				2	P53597	SUCLG1
9492900	11908000	7881100	5065500	5026100	5354100	4965600	3834400	4908700	23.1784	23.5054	22.91	22.2723	22.261	22.3522	22.2435	21.8706	22.2269	3	3	3	Q96I99	SUCLG2	X										Q96I99	SUCLG2
	2203500	4496800	1987000	2202900		2256600	2819600	2549800		21.0714	22.1005	20.9222	21.071		21.1057	21.4271	21.282	2	2	3	Q9Y2Z0	SUGT1											Q9Y2Z0	SUGT1
25386000	26338000	19441000	21355000	20788000	21059000	21077000	24360000	26139000	24.5975	24.6506	24.2126	24.3481	24.3092	24.3279	24.3292	24.538	24.6397	3	3	3	Q9Y5B9	SUPT16H		YES			YES				YES	3	Q9Y5B9	SUPT16H
8254100	6795500	4342500	4324700	2766500	4240800	2607300	3921900	4361200	22.9767	22.6961	22.0501	22.0442	21.3996	22.0159	21.3141	21.9031	22.0563	3	3	3	Q8IYB8	SUPV3L1		YES	YES		YES			YES		4	Q8IYB8	SUPV3L1
142470000	186250000	178550000	100940000	154580000	141390000	17508000	17110000	18283000	27.0861	27.4727	27.4118	26.5889	27.2038	27.0751	24.0615	24.0283	24.124	3	3	3	O60506	SYNCRIP	X	YES	YES	YES	YES	YES	YES	YES	YES	8	O60506	SYNCRIP	YES		YES
1411900	2995100	9561700	2456600	1607300	1249900	3873900	2669900	2128200	20.4292	21.5142	23.1888	21.2282	20.6162	20.2534	21.8854	21.3484	21.0212	3	3	3	P37802	TAGLN2			YES			YES			YES	3	P37802	TAGLN2
10274000	9747900	12210000	9713600	7838400	8240700	10320000	12082000	10940000	23.2925	23.2167	23.5416	23.2116	22.9021	22.9743	23.2989	23.5264	23.3831	3	3	3	F2Z393	TALDO1											F2Z393	TALDO1
3372300	5860400	6665000	4745000	3508600	4358100	7163700	7560800	7328000	21.6853	22.4826	22.6682	22.178	21.7425	22.0553	22.7723	22.8501	22.805	3	3	3	P26639	TARS						YES			YES	2	P26639	TARS
1792700	1320600	2541900	1499100		1979500	2043500	2024600	1994500	20.7737	20.3328	21.2775	20.5157		20.9167	20.9626	20.9492	20.9276	3	2	3	K7EK42	TBCB											K7EK42	TBCB
2033600	4110400	3075200	2847000	3720200	4422300	3813800	3752300	3572100	20.9556	21.9708	21.5522	21.441	21.8269	22.0764	21.8628	21.8393	21.7683	3	3	3	Q12788	TBL3					YES				YES	2	Q12788	TBL3
1598300	1721800	1874500	2398700		3272600	1507700	1471200	1331900	20.6081	20.7155	20.8381	21.1938		21.642	20.5239	20.4886	20.3451	3	2	3	O14776	TCERG1		YES	YES		YES				YES	4	O14776	TCERG1
83706000	59635000	62991000	119810000	182430000	116240000	18112000	12931000	18747000	26.3188	25.8297	25.9086	26.8362	27.4428	26.7925	24.1104	23.6243	24.1602	3	3	3	Q13428	TCOF1	X	YES	YES		YES				YES	4	Q13428	TCOF1
81135000	89954000	100010000	95391000	76058000	92613000	110880000	120920000	126270000	26.2738	26.4227	26.5756	26.5073	26.1806	26.4647	26.7244	26.8495	26.9119	3	3	3	P17987	TCP1		YES				YES			YES	3	P17987	TCP1
	1608200	2804400	2105300	2214200	2196000	1333500	1290600	1291400		20.617	21.4193	21.0056	21.0784	21.0664	20.3468	20.2996	20.3005	2	3	3	Q9NZ01	TECR			YES							1	Q9NZ01	TECR
16484000	14737000	21915000	18034000	15185000	19272000	24252000	23296000	24895000	23.9746	23.8129	24.3854	24.1042	23.8561	24.2	24.5316	24.4736	24.5694	3	3	3	P02786	TFRC					YES					1	P02786	TFRC
20692000	17610000	14500000	30076000	32649000	23530000	15720000	11180000	12866000	24.3026	24.0699	23.7895	24.8421	24.9605	24.488	23.9061	23.4144	23.6171	3	3	3	P22735	TGM1											P22735	TGM1
28151000	19408000	14713000	31931000	38846000	26770000	15584000	9000000	9921000	24.7467	24.2101	23.8106	24.9285	25.2113	24.6741	23.8936	23.1015	23.2421	3	3	3	Q08188	TGM3	X										Q08188	TGM3
6371200	4765500	4731800	4853200	6952800	7582000	3786400	4275600	5257300	22.6031	22.1842	22.174	22.2105	22.7292	22.8541	21.8524	22.0277	22.3259	3	3	3	Q9Y2W1	THRAP3		YES	YES		YES		YES	YES	YES	6	Q9Y2W1	THRAP3	YES
7576500	7389200	4212800	3470000		2913400	3761100	3537800	3268200	22.8531	22.817	22.0063	21.7265		21.4743	21.8427	21.7544	21.6401	3	2	3	O43615	TIMM44											O43615	TIMM44
29411000	44168000	45736000	44023000	34874000	46672000	60668000	60795000	60635000	24.8099	25.3965	25.4468	25.3918	25.0556	25.4761	25.8544	25.8574	25.8536	3	3	3	P29401	TKT						YES			YES	2	P29401	TKT
43692000	40691000	49324000	44570000	39971000	47387000	60799000	64949000	75208000	25.3809	25.2782	25.5558	25.4096	25.2525	25.498	25.8575	25.9528	26.1644	3	3	3	Q9Y490	TLN1			YES						YES	2	Q9Y490	TLN1
3891100	2411000	3216800	3227700	4741400	4817400	3287600	3840100	3639300	21.8917	21.2012	21.6172	21.6221	22.1769	22.1998	21.6486	21.8727	21.7952	3	3	3	Q9HD45	TM9SF3											Q9HD45	TM9SF3
4178400	4418800	7002600	6955100	3915500	6053900	6907900	6572800	5905700	21.9945	22.0752	22.7395	22.7296	21.9008	22.5294	22.7198	22.6481	22.4937	3	3	3	P49755	TMED10			YES							1	P49755	TMED10
2111300	2820500	3249500	4577900	2508400	3300500	5477600	4681300	5897200	21.0097	21.4275	21.6318	22.1263	21.2583	21.6543	22.3851	22.1585	22.4916	3	3	3	Q9BVK6	TMED9	X										Q9BVK6	TMED9
31203000	21388000	6873100	8861800	22578000	14544000	10123000	14927000	10347000	24.8952	24.3503	22.7125	23.0792	24.4284	23.7939	23.2711	23.8314	23.3027	3	3	3	Q8WUH6	TMEM263						YES				1	Q8WUH6	TMEM263
3391500	4324100	2598400	6944300	9053700	8853200	3350600	3406900	3567500	21.6935	22.044	21.3092	22.7274	23.1101	23.0778	21.676	21.7	21.7665	3	3	3	P57088	TMEM33	X										P57088	TMEM33
33163000	24504000	33193000	30907000	26206000	30359000	38759000	34067000	36323000	24.9831	24.5465	24.9844	24.8814	24.6434	24.8556	25.208	25.0219	25.1144	3	3	3	P42167	TMPO			YES			YES			YES	3	P42167	TMPO
13724000	8604600	11056000	9427300	10391000	11379000	16613000	17379000	16498000	23.7102	23.0367	23.3983	23.1684	23.3088	23.4399	23.9858	24.0508	23.9758	3	3	3	Q9H3N1	TMX1									YES	1	Q9H3N1	TMX1
1213800	1424500	1333000	1410500		1144000	1829200	1522400	1648600	20.2111	20.442	20.3462	20.4278		20.1257	20.8028	20.5379	20.6528	3	2	3	Q9Y320	TMX2											Q9Y320	TMX2
5703900	5157100	5004300	8227200	8584000	12261000	8753300	9318300	10044000	22.4435	22.2981	22.2547	22.972	23.0332	23.5476	23.0614	23.1516	23.2598	3	3	3	Q92973	TNPO1	X	YES	YES		YES				YES	4	Q92973	TNPO1
13156000	16859000	12760000	25336000	39503000	21614000	12193000	9577600	10860000	23.6492	24.007	23.6051	24.5947	25.2355	24.3655	23.5395	23.1912	23.3725	3	3	3	O96008	TOMM40	X										O96008	TOMM40
137450000	128090000	110680000	380990000	546480000	390690000	78932000	75840000	93561000	27.0343	26.9326	26.7218	28.5052	29.0256	28.5414	26.2341	26.1765	26.4794	3	3	3	P11387	TOP1	X	YES			YES				YES	3	P11387	TOP1	YES
68478000	63558000	47984000	47270000	37726000	50148000	57158000	62734000	63914000	26.0291	25.9216	25.5161	25.4944	25.1691	25.5797	25.7685	25.9027	25.9296	3	3	3	P11388	TOP2A		YES							YES	2	P11388	TOP2A			YES
3178200	5659900	2781600	2944900	1880200	2354600	5413100	5357800	5078000	21.5998	22.4323	21.4075	21.4898	20.8425	21.1671	22.368	22.3532	22.2758	3	3	3	Q02880	TOP2B	X								YES	1	Q02880	TOP2B
1971600	2729800	4050400	2165700		2104400	3059200	4603400	5342600	20.9109	21.3804	21.9496	21.0464		21.005	21.5447	22.1343	22.3491	3	2	3	J3KN66	TOR1AIP1											J3KN66	TOR1AIP1
11876000	13784000	27809000	14532000	10591000	17029000	15276000	16247000	14242000	23.5015	23.7165	24.729	23.7927	23.3363	24.0215	23.8648	23.9537	23.7636	3	3	3	P60174	TPI1									YES	1	P60174	TPI1
2198700	2634200	1797900	2494500		2832900	3002100	3386800	3498300	21.0682	21.3289	20.7779	21.2503		21.4338	21.5175	21.6915	21.7382	3	2	3	Q5VZU9	TPP2											Q5VZU9	TPP2
7520300	9242800	9470200	6082100	4608300	8368500	10045000	10093000	9868600	22.8424	23.1399	23.175	22.5361	22.1358	22.9965	23.26	23.2669	23.2344	3	3	3	P12270	TPR					YES				YES	2	P12270	TPR
4093300	6319200	3959200	5266300	3779100	6169800	6688800	5842800	7246600	21.9648	22.5913	21.9168	22.3284	21.8496	22.5568	22.6733	22.4782	22.7889	3	3	3	Q9ULW0	TPX2						YES			YES	2	Q9ULW0	TPX2
16331000	29438000	18423000	20649000	28594000	31499000	18466000	17606000	15131000	23.9611	24.8112	24.135	24.2996	24.7692	24.9088	24.1384	24.0696	23.851	3	3	3	P62995	TRA2B		YES	YES		YES	YES	YES	YES	YES	7	P62995	TRA2B	YES
62841000	65783000	38776000	29458000	32009000	30501000	28480000	31214000	30856000	25.9052	25.9712	25.2087	24.8122	24.932	24.8624	24.7634	24.8957	24.879	3	3	3	Q12931	TRAP1					YES				YES	2	Q12931	TRAP1
13502000	17390000	25232000	19780000	12526000	15810000	20488000	21783000	25605000	23.6867	24.0518	24.5888	24.2375	23.5784	23.9143	24.2883	24.3767	24.6099	3	3	3	Q13263	TRIM28		YES							YES	2	Q13263	TRIM28			YES
1088700	1921500	1929800	859460	961540	937810	495470	514460	414980	20.0542	20.8738	20.88	19.7131	19.875	19.8389	18.9184	18.9727	18.6627	3	3	3	Q9BRZ2	TRIM56	X	YES	YES		YES				YES	4	Q9BRZ2	TRIM56
336020000	469080000	603110000	440260000	237430000	354930000	525860000	528030000	616010000	28.324	28.8053	29.1678	28.7138	27.8229	28.403	28.9701	28.976	29.1984	3	3	3	P68363	TUBA1B											P68363	TUBA1B	YES	YES
1989800	2547600	6296200	1392300		1215800	2950500	3249300	2643300	20.9242	21.2807	22.586	20.409		20.2135	21.4925	21.6317	21.3339	3	2	3	F5H5D3	TUBA1C											F5H5D3	TUBA1C
245740000	220490000	253510000	234790000	193630000	227540000	248490000	244420000	261320000	27.8726	27.7161	27.9175	27.8068	27.5287	27.7615	27.8886	27.8648	27.9612	3	3	3	Q5JP53	TUBB											Q5JP53	TUBB
192640000	221030000	287780000	246300000	195450000	237680000	309310000	292030000	306760000	27.5213	27.7197	28.1004	27.8758	27.5422	27.8244	28.2045	28.1215	28.1925	3	3	3	P68371	TUBB4B									YES	1	P68371	TUBB4B
156490000	197880000	140600000	84967000	76250000	81326000	66972000	56624000	56248000	27.2215	27.5601	27.067	26.3404	26.1842	26.2772	25.9971	25.7549	25.7453	3	3	3	P49411	TUFM	X		YES		YES	YES			YES	4	P49411	TUFM
3555800	3314300	5486200	10936000	4020600		3315200	3503800	2841500	21.7617	21.6603	22.3874	23.3826	21.939		21.6607	21.7405	21.4382	3	2	3	THIO_HUMAN	TXN		YES	YES		YES	YES				4	THIO_HUMAN	TXN
2396400	2584800	4169500	2550400		1858800	2420200	3093800	2995500	21.1924	21.3016	21.9914	21.2823		20.8259	21.2067	21.5609	21.5144	3	2	3	Q8NBS9	TXNDC5			YES						YES	2	Q8NBS9	TXNDC5
4963700	4535300	7077400	5160200	4270100	7126000	4883000	3660100	4658300	22.243	22.1128	22.7548	22.299	22.0258	22.7647	22.2193	21.8035	22.1514	3	3	3	O43396	TXNL1									YES	1	O43396	TXNL1
6555000	9118200	7131700	11100000	9487500	10545000	9384700	9240500	10733000	22.6442	23.1203	22.7658	23.4041	23.1776	23.3301	23.1619	23.1395	23.3556	3	3	3	K7ENG2	U2AF2		YES	YES	YES	YES	YES	YES	YES		7	K7ENG2	U2AF2
56823000	61468000	74310000	53447000	39561000	54897000	86325000	76830000	89418000	25.76	25.8733	26.1471	25.6716	25.2376	25.7102	26.3633	26.1952	26.4141	3	3	3	P22314	UBA1		YES			YES				YES	3	P22314	UBA1
11216000	10423000	9402700	10045000	17201000	16811000	4655000	4244500	5394900	23.4191	23.3133	23.1646	23.26	24.036	24.0029	22.1503	22.0172	22.3632	3	3	3	F8W726	UBAP2L	X	YES	YES		YES	YES		YES		5	F8W726	UBAP2L
3757200	3086800	5019000	3701500	2384200	4423700	3671200	4565100	6080500	21.8412	21.5577	22.259	21.8197	21.1851	22.0768	21.8078	22.1222	22.5358	3	3	3	P61088	UBE2N		YES								1	P61088	UBE2N
7726800	7907200	4630400	6785600	5149100	6068600	7685500	8034800	7657200	22.8814	22.9147	22.1427	22.694	22.2959	22.5329	22.8737	22.9378	22.8684	3	3	3	Q16763	UBE2S											Q16763	UBE2S
1257500	1112000	1360600	1554300		1237600	1765900	1495000	1718300	20.2621	20.0847	20.3758	20.5678		20.2391	20.752	20.5117	20.7126	3	2	3	O94874	UFL1											O94874	UFL1
12965000	9224400	12204000	10483000	7878000	10628000	18851000	17590000	18358000	23.6281	23.137	23.5409	23.3215	22.9094	23.3414	24.1681	24.0683	24.1299	3	3	3	Q9NYU2	UGGT1											Q9NYU2	UGGT1
52817000	43955000	40954000	180170000	327880000	261830000	23856000	23882000	28033000	25.6545	25.3895	25.2875	27.4248	28.2886	27.9641	24.5078	24.5094	24.7406	3	3	3	Q92900	UPF1	X	YES	YES		YES	YES			YES	5	Q92900	UPF1		YES
7613500	12379000	14829000	9955800	6771600	6856400	11348000	10667000	11694000	22.8601	23.5614	23.8219	23.2471	22.6911	22.709	23.4359	23.3467	23.4793	3	3	3	P31930	UQCRC1									YES	1	P31930	UQCRC1
12590000	10832000	17902000	9159300	7762900	10422000	14757000	13835000	12654000	23.5858	23.3688	24.0936	23.1268	22.8882	23.3131	23.8149	23.7218	23.5931	3	3	3	P22695	UQCRC2									YES	1	P22695	UQCRC2
6209500	5529400	5590000	8147100	4529500	9660800	7289000	7894000	8160000	22.566	22.3987	22.4144	22.9579	22.1109	23.2037	22.7973	22.9123	22.9601	3	3	3	Q96IX5	USMG5											Q96IX5	USMG5
	3152400	2701000		3305800	2674700	2104700	1618500	1933800		21.588	21.3651		21.6566	21.3509	21.0052	20.6262	20.883	2	2	3	Q14694	USP10		YES	YES		YES			YES	YES	5	Q14694	USP10
14848000	14260000	17899000	14401000	13021000	18413000	18664000	24311000	22637000	23.8238	23.7655	24.0934	23.7797	23.6343	24.1342	24.1538	24.5351	24.4322	3	3	3	P54578	USP14									YES	1	P54578	USP14
1940100	1983600	2562000	2573800	3806100	2679900	3426400	3024200	4453500	20.8877	20.9197	21.2888	21.2955	21.8599	21.3537	21.7083	21.5281	22.0865	3	3	3	B9A018	USP39											B9A018	USP39
4229200	3960600	4034300	3540300	3827600	3692700	4282800	4259900	4609300	22.012	21.9173	21.9439	21.7554	21.868	21.8162	22.0301	22.0224	22.1361	3	3	3	P45974	USP5									YES	1	P45974	USP5
	3284800	5160300	2654300	1762300	2121300	5535900	5940500	5145900		21.6474	22.299	21.3399	20.749	21.0165	22.4004	22.5022	22.295	2	3	3	Q9P0L0	VAPA	X								YES	1	Q9P0L0	VAPA
7413000	8337000	9975400	10304000	8455700	9152600	13149000	13845000	14304000	22.8216	22.9911	23.2499	23.2967	23.0115	23.1258	23.6484	23.7229	23.7699	3	3	3	P26640	VARS	X								YES	1	P26640	VARS
27526000	27362000	29976000	31280000	25116000	29003000	34833000	36381000	39755000	24.7143	24.7057	24.8373	24.8987	24.5821	24.7897	25.054	25.1167	25.2446	3	3	3	Q99536	VAT1											Q99536	VAT1
51222000	50202000	63957000	61738000	44636000	58314000	87905000	82725000	89035000	25.6103	25.5812	25.9306	25.8797	25.4117	25.7973	26.3894	26.3018	26.4079	3	3	3	P55072	VCP	X	YES	YES			YES			YES	4	P55072	VCP
57392000	96706000	128970000	122290000	99166000	90558000	98748000	109220000	94550000	25.7743	26.5271	26.9425	26.8657	26.5633	26.4323	26.5572	26.7027	26.4946	3	3	3	P21796	VDAC1									YES	1	P21796	VDAC1
89244000	112580000	92343000	144170000	181760000	131040000	94807000	101610000	100950000	26.4113	26.7464	26.4605	27.1032	27.4375	26.9654	26.4985	26.5985	26.5891	3	3	3	A0A0A0MR02	VDAC2											A0A0A0MR02	VDAC2
15409000	13255000	28469000	19755000	16830000	13725000	25418000	20622000	20618000	23.8773	23.66	24.7629	24.2357	24.0045	23.7103	24.5993	24.2977	24.2974	3	3	3	Q9Y277	VDAC3											Q9Y277	VDAC3
25488000	31237000	68088000	41040000	34591000	33368000	45429000	49487000	48568000	24.6033	24.8968	26.0209	25.2905	25.0439	24.992	25.4371	25.5605	25.5335	3	3	3	P08670	VIM						YES				1	P08670	VIM	YES	YES
5976500	8119900	6953200	9266000	6422900	8074300	10378000	9825700	10762000	22.5109	22.953	22.7292	23.1435	22.6148	22.9449	23.307	23.2281	23.3594	3	3	3	Q96QK1	VPS35									YES	1	Q96QK1	VPS35
1552000	1617100	1799400	1636900		1672000	1751600	1646800	1672800	20.5657	20.625	20.7791	20.6425		20.6731	20.7402	20.6512	20.6738	3	2	3	I3L4J1	VPS4A											I3L4J1	VPS4A
15485000	11214000	10123000	3345100	3409600	3634600	2076200	2369400	2676100	23.8844	23.4188	23.2711	21.6736	21.7012	21.7934	20.9855	21.1761	21.3517	3	3	3	A3KMH1	VWA8	X										A3KMH1	VWA8
48686000	52339000	67597000	58036000	46998000	47906000	64234000	64894000	67813000	25.537	25.6414	26.0105	25.7904	25.4861	25.5137	25.9368	25.9516	26.0151	3	3	3	O75083	WDR1									YES	1	O75083	WDR1
126290000	88384000	70369000	121370000	190220000	121580000	59232000	43654000	90672000	26.9122	26.3973	26.0684	26.8548	27.5031	26.8573	25.8199	25.3796	26.4342	3	3	3	Q5T750	XP32											Q5T750	XP32
4459800	2893500	4296400	4374100	3104500	3798900	4478900	4204300	4339600	22.0885	21.4644	22.0347	22.0606	21.5659	21.8572	22.0947	22.0034	22.0491	3	3	3	Q5T6H7	XPNPEP1											Q5T6H7	XPNPEP1
4857500	5497500	5315600	5729000	5443000	5976300	7362100	7653200	9302700	22.2118	22.3903	22.3418	22.4499	22.376	22.5108	22.8117	22.8676	23.1492	3	3	3	O14980	XPO1									YES	1	O14980	XPO1
40202000	42117000	49921000	45876000	35705000	54233000	62895000	62580000	69860000	25.2608	25.3279	25.5731	25.4512	25.0896	25.6927	25.9064	25.8992	26.058	3	3	3	P13010	XRCC5		YES	YES		YES	YES	YES		YES	6	P13010	XRCC5	YES		YES
52073000	66094000	58943000	69965000	45755000	56396000	93034000	90756000	97605000	25.634	25.978	25.8128	26.0601	25.4474	25.7491	26.4713	26.4355	26.5405	3	3	3	P12956	XRCC6	X	YES	YES		YES	YES	YES	YES	YES	7	P12956	XRCC6	YES		YES
3527300	3710900	3799000	4164400		3032000	5707500	4421300	7560800	21.7501	21.8233	21.8572	21.9897		21.5318	22.4444	22.076	22.8501	3	2	3	Q9H0D6	XRN2		YES	YES		YES		YES	YES	YES	6	Q9H0D6	XRN2
6971900	4990700	6129800	4102800	2963500	4947900	5600700	4756100	3725200	22.7331	22.2508	22.5474	21.9682	21.4989	22.2384	22.4172	22.1813	21.8289	3	3	3	P54577	YARS			YES		YES	YES			YES	4	P54577	YARS
328300000	367310000	395010000	342510000	568550000	551970000	110480000	125050000	107210000	28.2904	28.4524	28.5573	28.3516	29.0827	29.04	26.7192	26.8979	26.6759	3	3	3	P67809	YBX1	X	YES	YES	YES	YES	YES	YES	YES	YES	8	P67809	YBX1	YES		YES
40570000	42679000	29623000	50137000	63356000	61074000	9443100	14496000	13226000	25.2739	25.347	24.8202	25.5794	25.917	25.8641	23.1708	23.7892	23.6569	3	3	3	P16989	YBX3	X	YES	YES	YES	YES	YES	YES	YES	YES	8	P16989	YBX3		YES
1976200	1622300		1383200	2084400	2061000	1070800	1453600	1587300	20.9143	20.6296		20.3996	20.9912	20.9749	20.0303	20.4712	20.5981	2	3	3	F8VU51	YLPM1		YES	YES				YES	YES		4	F8VU51	YLPM1
2716500	3590200	12129000	2773700		3228400	7231900	3988300	5310700	21.3733	21.7756	23.532	21.4034		21.6224	22.7859	21.9273	22.3405	3	2	3	P31946	YWHAB						YES			YES	2	P31946	YWHAB
17682000	18153000	31350000	20620000	15966000	18289000	17681000	25719000	18752000	24.0758	24.1137	24.902	24.2975	23.9285	24.1245	24.0757	24.6163	24.1605	3	3	3	P62258	YWHAE			YES		YES				YES	3	P62258	YWHAE
9476500	7864300	18883000	13249000	7052600	15871000	52034000	11158000	9078100	23.1759	22.9069	24.1706	23.6594	22.7497	23.9199	25.633	23.4116	23.114	3	3	3	P61981	YWHAG					YES	YES			YES	3	P61981	YWHAG
1576300	1043000	8614100	2342700	1976600	1798800	3856200	2527700	2883400	20.5881	19.9923	23.0383	21.1597	20.9146	20.7786	21.8787	21.2694	21.4593	3	3	3	Q04917	YWHAH											Q04917	YWHAH
5460500	6713500	13366000	7185900	7998600	6545600	7575100	14258000	10284000	22.3806	22.6786	23.6721	22.7767	22.9313	22.6421	22.8528	23.7653	23.2939	3	3	3	P27348	YWHAQ									YES	1	P27348	YWHAQ
26574000	23687000	51419000	30485000	32512000	24916000	36539000	39084000	35707000	24.6635	24.4976	25.6158	24.8616	24.9545	24.5706	25.1229	25.2201	25.0897	3	3	3	P63104	YWHAZ					YES	YES			YES	3	P63104	YWHAZ
6741800	3053000	7338800	5706700	7136400	8637500	13368000	13137000	10601000	22.6847	21.5418	22.8071	22.4442	22.7668	23.0422	23.6723	23.6471	23.3377	3	3	3	P43403	ZAP70											P43403	ZAP70
1346200	2128300		1848000		2460200	1791900	2688800	1623700	20.3605	21.0213		20.8175		21.2303	20.7731	21.3585	20.6309	2	2	3	E9PQ61	ZC3H11A		YES	YES		YES	YES	YES	YES		6	E9PQ61	ZC3H11A
24444000	21734000	16174000	22090000	32393000	27598000	17614000	21433000	19323000	24.543	24.3735	23.9472	24.3969	24.9492	24.7181	24.0702	24.3533	24.2038	3	3	3	Q7Z2W4	ZC3HAV1		YES	YES		YES	YES		YES	YES	6	Q7Z2W4	ZC3HAV1
6302500	6364600	4587900	4930800	6983800	4210700	2850800	2881600	2089400	22.5875	22.6016	22.1294	22.2334	22.7356	22.0056	21.4429	21.4584	20.9947	3	3	3	Q5BKZ1	ZNF326	X	YES	YES		YES	YES	YES	YES	YES	7	Q5BKZ1	ZNF326
																						Total	159	306	299	31	312	256	129	144	446	633			93	27	32

## Sheet: Differential Protein Interactor
Proteins Identified by HyPR-MS		Protein Identified in PolyA RNA Binding Protein Studies									Protein previously identified in HIV RNA segment interaction studies
Protein ID	Gene names	Baltz 2012	Beckmann 2015	Kramer 2014	Castello 2012	Castello 2016	Conrad 2016_chr	Conrad 2016	Hs_Queiroz 2019 (OOPS)	# of studies "yes"	Stake, 2015 (5'UTR)	Kula, 2011 (5'LTR, TAR, SD1, psi, SA7, 3'LTR)	Marchand, 2011 (nt 7965-8046; SLS2-A7)-nuclear factors	Knoener, 2017 (US HIV RNA)	Oughtred, 2019 (BioGrid HIV protein-host protein interactions)
Q5JTZ9	AARS2								YES	1
Q13085	ACACA								YES	1					gag
B7Z9I1	ACADM
Q4G176	ACSF3
P63267	ACTG2
O96019	ACTL6A														tat
Q9Y4W6	AFG3L2
E9PC15	AGK
O00116	AGPS								YES	1					vpr
Q13155	AIMP2								YES	1	YES				gag
P54886	ALDH18A1	no	no	no	YES	YES	no	no	YES	3
P30038	ALDH4A1
O75342	ALOX12B
K7EJL1	AP1M1														nef, env
C9JF17	APOD													P05090
Q5QNZ2	ATP5F1														vpu
Q8WWM7	ATXN2L	YES	YES	no	YES	YES	no	no	YES	5					gag
P51572	BCAP31														nef, env
O75934	BCAS2
E9PK09	BCLAF1	YES	YES	no	YES	no	YES	YES		5
Q8WY22	BRI3BP
J3QT28	BUB3
E7ETZ4	BZW2	no	YES	no	no	no	no	no		1					tat
F8VPD4	CAD
P27824	CANX	YES	YES	no	YES	YES	no	no	YES	5					env
Q14444	CAPRIN1	YES	YES	no	YES	YES	no	no	YES	5		YES		Q14444	rev
P31944	CASP14
Q9UKY7	CDV3	no	YES	no	no	no	no	no	YES	2					gag
Q9Y6H1	CHCHD2
H0YE91	CHI3L2														env
Q8N5K1	CISD2	no	no	no	YES	YES	no	no		2
Q14008	CKAP5								YES	1
Q96KA5	CLPTM1L
O76031	CLPX
Q9Y678	COPG1	no	no	no	no	YES	no	no	YES	2
Q9UBF2	COPG2								YES	1
H3BNX8	COX5A														env
O75534	CSDE1	YES	YES	no	YES	YES	no	YES	YES	6					gag
P55060	CSE1L	no	YES	no	no	YES	no	no	YES	3
CATG_HUMAN	CTSG														env
K7EQ55	DAZAP1	YES	YES	no	YES	YES	YES	YES		6					rev
B4E1G1	DERL1
H7BXY3	DHX30	YES	no	no	YES	YES	YES	no		4					tat
P09622	DLD	no	YES	no	no	YES	no	no	YES	3
P50570	DNM2
Q92608	DOCK2
Q14204	DYNC1H1	YES	no	no	YES	no	no	no	YES	3				Q14204	vpr, rev
Q5VTE0	EEF1A1P5											EEF1A1	EEF1A1
Q99613	EIF3C	YES	no	no	YES	no	no	no		2					gag-pol
H0Y3P2	EIF4G2	YES	YES	no	YES	YES	no	no		4
Q9BQ52	ELAC2	YES	YES	no	YES	YES	no	no	YES	5
P07814	EPRS	no	no	no	no	YES	no	no	YES	2	YES				gag
P38117	ETFB
Q9NZB2	FAM120A	YES	YES	no	YES	YES	no	YES	YES	6				Q9NZB2
G3XAI9	FAM133B	YES	no	no	no	no	no	no		1					env
F2Z2S2	FRYL
P51114	FXR1	YES	YES	no	YES	YES	no	YES	YES	6				P51114
Q13283	G3BP1	YES	YES	no	YES	YES	no	YES	YES	6					env
P04591	GAG
P04585	GAG-POL
Q10471	GALNT2								YES	1
Q14697	GANAB	no	YES	no	YES	no	no	no		2					env
O75323	GBAS
Q92947	GCDH
O75223	GGCT	no	YES	no	no	no	no	no		1
P36915	GNL1								YES	1
U3KQ56	GRHPR
F5H5I6	GRSF1	YES	YES	no	YES	YES	YES	YES		6	YES
Q96QA5	GSDMA
P07305	H1F0	YES	no	no	YES	YES	no	no		3
P40939	HADHA								YES	1					vpu
P42357	HAL
O14929	HAT1								YES	1					vpr
Q9BX68	HINT2
P16401	HIST1H1B	no	no	no	YES	YES	YES	YES		4				P16401
P16403	HIST1H1C	YES	no	no	YES	YES	YES	no	YES	5	YES				gag
P16402	HIST1H1D	YES	no	no	no	no	no	YES		2
P10412	HIST1H1E	YES	no	no	no	YES	YES	YES	YES	5
Q8TCT9	HM13														env
P26583	HMGB2	YES	no	no	YES	YES	no	no	YES	4
F2Z2W6	HMGN1
P22626	HNRNPA2B1	YES	YES	YES	YES	YES	YES	YES	YES	8	YES		YES		rev, gag-pol
P51991	HNRNPA3	YES	YES	YES	YES	YES	YES	YES	YES	8	YES	YES	YES		rev
P61978	HNRNPK	YES	YES	YES	YES	YES	YES	YES	YES	8	YES		YES	P61978
P14866	HNRNPL	YES	YES	YES	YES	YES	YES	YES	YES	8					vif
O43390	HNRNPR	YES	YES	YES	YES	YES	YES	YES	YES	8	YES	YES	YES	O43390	rev
Q99714	HSD17B10	YES	YES	no	no	no	no	no	YES	3
P48735	IDH2	no	no	no	no	YES	no	no		1
H0YL72	IDH3A														gag-pol
A0A087WZN1	IDH3B
Q9NZI8	IGF2BP1	YES	YES	no	YES	YES	YES	YES		6	YES			Q9NZI8	gag
O00425	IGF2BP3	YES	YES	no	YES	YES	YES	YES		6	YES
P01876	IGHA1													P01876
A0A075B6L0	IGLC3
B4DY09	ILF2	YES	YES	no	YES	YES	YES	YES		6	YES		YES	Q12905	tat, rev
Q12906	ILF3	YES	YES	no	YES	YES	YES	YES	YES	7	YES	YES	YES		tat, rev
Q8TEX9	IPO4	no	YES	no	no	no	no	no	YES	2					vpr, gag-pol
Q9P2J5	LARS								YES	1				Q9P2J5	gag
P31025	LCN1
O00182	LGALS9
K7EJE8	LONP1
P23490	LOR
P42704	LRPPRC	YES	YES	no	YES	YES	no	YES	YES	6				P42704	vpu
E7EQB2	LTF
Q9NZL9	MAT2B								YES	1
C9JP00	MBNL1	YES	no	no	YES	no	YES	YES		4
Q96N66	MBOAT7
E9PHF7	MCCC1													Q96RQ3	gag
Q9HCE1	MOV10	YES	YES	no	YES	no	no	YES	YES	5		YES		Q9HCE1
Q9BYD6	MRPL1	YES	YES	no	YES	no	no	no		3
Q9Y3B7	MRPL11	YES	YES	no	YES	no	no	no		3					gag
G5E9W7	MRPS22
Q92665	MRPS31	YES	YES	no	YES	YES	no	no		4
P82933	MRPS9	YES	YES	no	no	no	no	no	YES	3					rev
B4DHE8	MSI2	YES	YES	no	YES	YES	YES	YES		6
O94776	MTA2								YES	1					vpr, tat
A0A087WVM4	MTHFD1L
P13995	MTHFD2														nef
P22033	MUT
F8W1N5	NACA										YES
Q9BPX3	NCAPG								YES	1					tat
Q969V3	NCLN
Q9HCD5	NCOA5	YES	no	no	no	no	no	no	YES	2
Q8TDX7	NEK7														tat
C9JDR0	NSDHL
Q7Z417	NUFIP2	YES	YES	no	YES	YES	no	no	YES	5					gag
E9PF10	NUP155
Q7Z3B4	NUP54
E9PIN3	NXF1	YES	YES	no	YES	no	no	no		3
P04181	OAT								YES	1
F8VUA7	OSBPL8
P22234	PAICS	no	YES	no	no	no	no	no	YES	2				P22234
P11498	PC	no	YES	no	no	no	no	no	YES	2				P11498
P05165	PCCA													P05165
P12004	PCNA								YES	1				P12004
P11177	PDHB								YES	1
O75439	PMPCB								YES	1
E7EPA1	PRPSAP2
P48634	PRRC2A	YES	YES	no	YES	no	no	YES	YES	5		YES (Bat2)			gag
E7EPN9	PRRC2C	YES	YES	no	YES	YES	no	YES		5					gag
O00487	PSMD14
P43487	RANBP1								YES	1				P43487	vpu
Q7Z6E9	RBBP6	YES	no	no	no	no	YES	YES	YES	4					tat
B9ZVT1	RBM12B	YES	YES	no	YES	YES	YES	YES		6
Q9BWF3	RBM4	YES	YES	no	YES	YES	no	no	YES	5
E7ETU5	RBMS1	YES	YES	no	YES	no	no	no		3
P38159	RBMX	YES	YES	no	YES	YES	YES	YES	YES	7	YES
P40938	RFC3
P35249	RFC4
P61586	RHOA
Q5UIP0	RIF1	no	no	no	no	no	no	YES	YES	2		YES
X1WI28	RPL10	YES	no	no	YES	no	no	no		2
P50914	RPL14	YES	YES	no	YES	YES	YES	no	YES	6	YES
P61313	RPL15	YES	YES	no	YES	YES	YES	no	YES	6	YES
P46778	RPL21	YES	YES	no	YES	YES	no	no	YES	5
P47914	RPL29	YES	YES	no	YES	no	YES	YES	YES	6	YES				gag
P05387	RPLP2	no	no	no	no	YES	no	no	YES	2
S4R456	RPS15	YES	YES	no	YES	no	no	no		3
P08708	RPS17	YES	no	no	YES	no	no	no	YES	3					rev
P62854	RPS26	YES	YES	no	YES	YES	no	YES	YES	6	YES
P62701	RPS4X	YES	no	no	YES	no	no	no	YES	3	YES				rev
P62241	RPS8	YES	YES	no	YES	YES	YES	YES	YES	7	YES
A0A0A0MRV0	RRBP1	YES	YES	no	no	no	no	no		2
Q15424	SAFB	YES	YES	no	YES	YES	YES	YES	YES	7					rev
M0QWZ7	SARS2	YES	no	no	no	no	no	no		1
A3KN83	SBNO1
Q8NBX0	SCCPDH
Q8WVM8	SCFD1
B5MCX3	Septin-2
A0A087WZZ5	SF3B2	YES	YES	no	YES	no	no	no		3					vpr
Q9GZT3	SLIRP	YES	YES	no	YES	YES	no	YES	YES	6					vpu
Q9NWH9	SLTM	YES	YES	no	YES	YES	YES	YES	YES	7
P18583	SON	YES	YES	no	YES	no	YES	no	YES	5					gag
Q96T58	SPEN	YES	YES	no	YES	YES	YES	YES	YES	7					tat
P22531	SPRR2E
Q01082	SPTBN1	YES	YES	no	no	YES	no	no		3	YES			Q01082	rev
O76094	SRP72	YES	YES	no	YES	YES	no	no	YES	5
Q9UQ35	SRRM2	YES	YES	no	YES	YES	YES	no	YES	6					tat, gag
Q13247	SRSF6	YES	YES	YES	YES	YES	YES	YES	YES	8	YES
Q04837	SSBP1	YES	YES	no	YES	YES	no	no		4					rev
G5EA18	STAU2	YES	YES	no	YES	no	no	YES		4					tat
Q96SI9	STRBP	YES	YES	no	YES	YES	YES	YES	YES	7
Q9P2R7	SUCLA2														gag-pol
P53597	SUCLG1	no	no	no	YES	YES	no	no		2
Q96I99	SUCLG2
O60506	SYNCRIP	YES	YES	YES	YES	YES	YES	YES	YES	8	YES		YES	O60506	rev
Q9BW92	TARS2								YES	1
Q13428	TCOF1	YES	YES	no	YES	no	no	no	YES	4					gag
Q08188	TGM3													Q08188
Q3ZCQ8	TIMM50
Q9BVK6	TMED9														rev
P57088	TMEM33
Q92973	TNPO1	YES	YES	no	YES	no	no	no	YES	4					rev
O96008	TOMM40														env
P11387	TOP1	YES	no	no	YES	no	no	no	YES	3	YES
Q02880	TOP2B								YES	1
Q13595	TRA2A	YES	YES	no	YES	YES	YES	YES	YES	7
Q9BRZ2	TRIM56	YES	YES	no	YES	no	no	no	YES	4
A0A0A0MRA3	TTN
P49411	TUFM	no	YES	no	YES	YES	no	no	YES	4					tat
P0DN76	U2AF1	YES	YES	no	YES	YES	YES	YES		6			YES		rev
F8W726	UBAP2L	YES	YES	no	YES	YES	no	YES		5					gag
Q92900	UPF1	YES	YES	no	YES	YES	no	no	YES	5		YES
Q9P0L0	VAPA								YES	1					env
P26640	VARS								YES	1
P55072	VCP	YES	YES	no	no	YES	no	no	YES	4					env
A3KMH1	VWA8
P12956	XRCC6	YES	YES	no	YES	YES	YES	YES	YES	7	YES		YES		gag-pol
P67809	YBX1	YES	YES	YES	YES	YES	YES	YES	YES	8	YES		YES	P67809	tat
P16989	YBX3	YES	YES	YES	YES	YES	YES	YES	YES	8		YES		P16989
A0A087WXZ3	YTHDF2	YES	YES	no	YES	no	no	YES		4
Q5BKZ1	ZNF326	YES	YES	no	YES	YES	YES	YES	YES	7
		89	82	9	84	69	39	48	92	131	26	8	10	25	76	Total
															14	Tat
															25	Gag/Gag-Pol
															18	Rev
															57	Tat/Gag/Gag-Pol/Ref
