# Supplementary material for: Identification of host proteins differentially associated with HIV-1 RNA splice variants
Source: eLife. 2021 Feb 25;10:e62470. doi: 10.7554/eLife.62470 (PMC7906601; doi:10.7554/eLife.62470)
Supplement: Supplementary file 4. — Related to Figures 2 and 3. [file elife-62470-supp4.xlsx]

## Sheet: Table S7_MS and siRNA KD
Supplementary File 4: Summary of HIV-1 splice variant interactome MS data and siRNA KD expression changes data. Related to Figures 2 and 3.
		Mass Spec Analysis: Proteins with differential binding to HIV splice variants									siRNA Knock Down Results: Proteins with Statistically Significant effect on expression of HIV unspliced and/or completely splice transcript						Putative Negative Effectors	Putative Positive Effectors	Knoener, 2017 (US HIV RNA)	Oughtred, 2019 (BioGrid HIV protein-host protein interactions)
		Unspliced HIV Transcript			Partially Spliced HIV Transcript			Completely Spliced HIV Transcript			p-values: Target KD vs siCTRL			% Change in Expression
Protein	MS Heatmap Order	US BioRep1	US BioRep2	US BioRep3	PS BioRep1	PS BioRep2	PS BioRep3	CS BioRep1	CS BioRep2	CS BioRep3	M p-value	C p-value	C/M p-value	M % diff	C % diff	C/M % diff
CHI3L2	1	0.752526	0.233426	0.430566	-0.437794	-0.108044	0.584316	-0.871484	-0.234144	-0.349364										env
NSDHL	2	0.460563	1.35733	0.517173	-1.01904	0.293313	0.637733	-0.783887	-0.824097	-0.639097
MRPS31	3	0.783284	1.15845	-0.046526	-0.604766	0.468564	0.704814	-0.676596	-0.890486	-0.896746	0.00973242	0.0365455	0.248091	-18.1072	-25.8208	-9.37193		x
HINT2	4	0.285302	0.554962	1.05583	-0.107098	-0.536278	0.672862	-0.200798	-1.22638	-0.498408
MRPL11	5	0.19642	0.45336	0.75283	-0.12776	-0.65664	0.32334	-0.37534	-0.30686	-0.25935										gag
TRIM56	6	0.299858	1.11949	1.12571	-0.041242	0.120678	0.084628	-0.835872	-0.781612	-1.09163	0.0344318	0.0315372	0.526738	-47.7416	-52.1098	-7.54457		x
GAG	7	0.002543	2.27969	1.52892	0.331143	0.080793	1.12111	-1.28182	-2.01534	-2.04706
MRPS22	8	0.653353	0.903043	0.404133	0.244843	-0.732667	-0.628327	-0.063087	-0.723657	-0.057637
MCCC1	9	2.61788	2.27141	2.41832	0.281044	-1.60938	-1.75557	-1.40457	-1.22652	-1.59265									Q96RQ3	gag
HSD17B10	10	0.530438	0.886428	0.483458	0.060248	-0.621102	-0.316752	-0.334422	-0.272452	-0.415842	0.528351	0.0185628	0.0291755	5.26914	27.2079	19.4682	x
ETFB	11	0.672658	0.934208	0.177648	0.118368	-0.349312	-0.006552	-0.583962	-0.543652	-0.419402
CTSG	12	1.25119	1.83992	0.7102	0.08101	-0.61263	0.14271	-1.75465	-1.65663	-0.00112										env	stress granule protein
MTHFD1L	13	0.838217	0.835177	0.250307	-0.405963	-0.280963	-0.053773	-0.386403	-0.398683	-0.397913	0.0439319	0.00569192	0.00928042	-36.208	-59.1302	-42.3342		x
IDH3A	14	0.955727	1.08304	0.501147	-0.517153	-0.161903	-0.317273	-0.444933	-0.611033	-0.487613										gag-pol
HADHA	15	0.645801	0.602861	0.222911	-0.116469	-0.190439	-0.164309	-0.300839	-0.334919	-0.364599	0.979101	0.00318146	0.000421086	0.317564	-51.0307	-52.9694		x		vpu
ALDH18A1	16	0.70249	0.80951	0.28122	-0.389	-0.42228	-0.16011	-0.2967	-0.33419	-0.19094
PCNA	17	1.81035	1.87512	0.692827	-0.693443	-1.16038	-0.870973	-0.692103	-0.363783	-0.597603									P12004				nuclear body
ACADM	18	0.968722	1.19479	0.586582	-0.120608	-0.274648	-0.304988	-0.780808	-0.760128	-0.508918
TUFM	19	0.760638	1.0992	0.606168	-0.120452	-0.276622	-0.183642	-0.463792	-0.705942	-0.715552										tat
SUCLG2	20	0.642828	0.969838	0.374378	-0.263322	-0.274582	-0.183382	-0.292052	-0.665022	-0.308682
LONP1	21	0.902191	0.912551	0.516581	-0.176639	-0.156019	-0.500089	-0.337169	-0.715699	-0.445709
PC	22	5.92837	5.88527	5.71961	-1.93766	-2.93328	-1.8125	-0.570062	-5.6021	-4.67763									P11498
SARS2	23	1.36404	0.475832	0.450672	-0.372458	-0.369098	-0.017958	-0.428948	-0.498438	-0.603648
SUCLA2	24	0.991822	0.724392	0.448942	-0.510188	-0.300378	-0.233268	-0.222018	-0.401998	-0.497308										gag-pol
SUCLG1	25	1.26115	0.596852	0.623082	-0.631408	-0.394438	-0.464548	-0.183558	-0.413358	-0.393778
ACACA	26	1.48723	1.07486	1.1636	-0.735762	-0.894552	-0.077822	-0.529132	-0.768522	-0.719892	0.0793087	0.0453332	0.0467849	-12.2587	-33.6871	-25.1373		x		gag
SSBP1	27	1.89102	1.52595	1.50805	-0.943299	-1.15293	-0.438429	-0.952669	-0.590979	-0.846719										rev
GBAS	28	0.760926	0.440546	0.714816	-0.530954	-0.620174	0.011676	-0.390734	-0.301894	-0.084204	0.00995076	0.752933	0.0368172	16.9119	1.50237	-21.0168	x
ALDH4A1	29	1.22088	0.292889	0.907839	-0.118821	-0.147961	-0.355461	-0.901191	-0.377671	-0.520501
CLPX	30	1.15753	1.03344	0.621397	-0.823153	-0.108373	-0.065313	-0.634043	-0.665743	-0.515733	0.763169	0.00466758	0.00239878	3.23339	-33.516	-41.1907		x
PDHB	31	1.49362	1.25469	0.983694	-0.556936	0.019164	-0.481666	-1.01357	-0.940976	-0.758036
IDH2	32	0.887844	0.609244	0.597234	-0.179566	-0.089756	-0.273606	-0.626566	-0.485956	-0.438876	0.010924	0.00247429	0.0100281	-51.9286	-63.6084	-31.5063		x
VWA8	33	1.74484	1.27927	1.1316	-0.465909	-0.438359	-0.346159	-1.15402	-0.963439	-0.787829	0.0280434	0.940633	0.0176334	-26.7516	0.32717	37.9889		x
RPL15	34	1.09171	0.701052	0.375802	-0.267468	0.207002	-0.386118	-0.821128	-0.706358	-0.194498	0.00374107	0.0216255	0.0105775	-73.0856	-58.3002	69.0583		x
AARS2	35	1.34906	1.32447	1.1695	-0.89861	0.6763	-0.05781	-1.21934	-1.16142	-1.18215	0.0114204	0.000686314	0.00118039	-33.8327	-65.948	-54.3035		x
PCCA	36	2.36512	2.21521	2.97013	-2.18382	0.567604	-1.02586	-1.99209	-1.39303	-1.5233									P05165
OAT	37	1.0684	1.26547	0.844364	0.142674	-0.263236	-0.386136	-0.437556	-0.142656	-2.09134
COX5A	38	-0.020356	-0.105756	1.17928	0.402464	0.302444	1.29887	-1.82949	-0.319506	-0.907966	0.932324	0.00624025	0.000130276	-1.40439	-50.7793	-50.2873		x		env
RIF1	39	0.884272	-1.36143	1.32825	0.868092	0.961902	0.172682	-0.786208	-0.637818	-1.42975													nuclear body
CHCHD2	40	0.080446	0.415506	0.740226	0.501636	0.395206	0.837686	0.112646	-1.46864	-1.6147
DHX30	41	0.410682	0.351522	-0.018588	0.109422	0.727452	0.658312	-0.827218	-0.828138	-0.583448	0.002399	0.0111304	0.233556	41.6205	64.809	14.7709	x			tat
UBAP2L	42	0.338329	0.232549	0.083919	0.179249	0.955269	0.922179	-0.930371	-1.06356	-0.717561	7.2494e-05	0.000578178	0.0203918	-49.047	-58.2953	-17.4205		x		gag
HNRNPL	43	0.382247	0.357437	0.007927	0.147637	0.825167	0.484177	-0.658783	-0.786613	-0.759193	1.22205e-06	0.000151678	0.771465	-79.4787	-78.5045	5.31354		x		vif					splicing
RBMX	44	0.269617	0.154257	0.117907	0.253057	0.904357	0.542027	-0.740813	-0.854783	-0.645623	0.0556644	0.00549691	0.04662	-18.5983	-38.2508	-25.2483		x				spliceosomal complex			splicing
G3BP1	45	0.641821	0.338581	0.200451	0.393411	1.03419	0.703651	-1.13856	-1.268	-0.905549	0.019198	0.00501355	0.0380302	-34.0655	-45.9639	-18.6483		x		env	stress granule protein
HNRNPA3	46	0.143972	0.181282	0.307172	0.112262	0.475712	0.383552	-0.376128	-0.695048	-0.532778	0.00661677	0.00201844	0.564054	-35.7441	-40.8543	-5.33121		x		rev		spliceosomal complex
NUFIP2	47	0.074889	0.485739	0.294059	0.261549	1.11388	0.726419	-0.973881	-1.03243	-0.950221										gag	stress granule protein		nuclear body
GRSF1	48	0.979469	0.215209	0.418419	0.231869	1.1105	0.754639	-1.11691	-1.35319	-1.24
LRPPRC	49	0.81784	0.6755	0.38499	0.06626	0.85961	0.69452	-1.18637	-1.22258	-1.08977	0.000304163	0.0348459	0.431417	45.4996	36.7004	-6.60014	x		P42704	vpu
HNRNPK	50	0.136053	0.109043	0.225643	0.008903	0.314983	0.282953	-0.359557	-0.360047	-0.357977	9.52889e-05	7.77741e-05	0.000435087	-65.3772	-80.0161	-44.7879		x	P61978		stress granule protein	spliceosomal complex
CAPRIN1	51	0.666152	0.331892	0.911972	0.249362	1.08701	0.992872	-1.4019	-1.25122	-1.58615	4.19275e-05	0.000810065	0.307499	-54.8403	-60.008	-10.8946		x	Q14444	rev	stress granule protein			p-body
YBX1	52	0.282943	0.444923	0.549813	0.344073	1.07521	1.03251	-1.28829	-1.10957	-1.33163	0.0207997	0.00391979	7.64598e-05	31.3924	-43.1258	-56.1598	x	x	P67809	tat	stress granule protein	spliceosomal complex			splicing
IGF2BP1	53	0.794804	0.729494	0.682034	0.452814	1.2612	0.897184	-1.69011	-1.59602	-1.53142	0.790656	0.0327497	0.000478097	-6.35428	-37.8092	-32.413		x	Q9NZI8	gag	stress granule protein
HNRNPR	54	0.818551	1.0472	0.748901	0.652531	1.12472	1.03469	-1.75629	-1.9569	-1.71341	0.0364439	0.00140803	0.0197035	-40.8571	-58.3806	-25.0962		x	O43390	rev		spliceosomal complex
FAM120A	55	1.11567	1.14294	1.1011	0.838663	1.47663	1.25218	-2.43506	-2.32579	-2.16636	0.0217145	0.000616122	0.00050906	-27.7533	-56.3107	-40.4912		x	Q9NZB2
IGF2BP3	56	0.743811	0.649321	0.601901	0.728371	1.36363	1.062	-1.70331	-1.79169	-1.65404	0.118847	0.0476589	0.0440353	-25.4556	-39.5065	-21.4209		x
MOV10	57	1.33619	1.22792	1.06125	1.95371	2.74958	2.54719	-3.62496	-3.67897	-3.57195	3.95284e-06	0.000306668	0.796388	-72.3102	-73.2439	-3.66453		x	Q9HCE1		stress granule protein			p-body
GCDH	58	0.49155	0.22325	0.29508	-0.38726	0.72648	1.02765	-0.5893	-1.00273	-0.78472	0.00550298	0.000983803	0.0142721	46.3532	95.9949	32.8463	x
NCOA5	59	0.802628	0.213868	0.429588	-0.440382	1.09019	1.28147	-0.623192	-1.7023	-1.05186
SLIRP	60	0.080901	0.172941	0.580121	-0.175949	0.703171	0.135021	-0.443439	-0.545879	-0.506889	0.00193919	0.0127587	0.516385	-42.2259	-49.4665	-12.2039		x		vpu
HNRNPA2B1	61	0.346472	0.244782	0.593102	-0.058388	0.420032	0.472792	-0.756418	-0.471548	-0.790828	0.000190263	0.00690678	0.0980608	-52.296	-44.6201	16.6785		x		rev, gag-pol		spliceosomal complex	nuclear body
CSDE1	62	0.454977	0.639067	0.527727	0.164907	0.517997	0.378967	-1.1283	-0.918673	-0.636663	0.203321	0.0495729	0.00577981	17.0802	82.0427	51.7642	x			gag
FXR1	63	0.751144	0.755984	0.714434	-0.044416	0.374054	0.484784	-0.980796	-1.12862	-0.926576									P51114		other cyto granule
GAG-POL	64	1.11868	1.0858	0.803442	0.377652	0.940982	0.827662	-1.62031	-1.73514	-1.79878
SYNCRIP	65	0.969173	1.35576	1.29484	0.472013	1.08687	0.958203	-2.0554	-2.08857	-1.99291									O60506	rev		spliceosomal complex
IDH3B	66	1.05509	0.710623	0.653133	-0.192417	0.243033	0.069983	-0.759127	-0.917207	-0.863117	0.000229165	0.00186764	0.0392017	-42.6935	-50.8514	-14.2094		x
PMPCB	67	0.90851	0.67237	0.60661	-0.06561	-0.04629	0.01373	-0.67246	-0.74546	-0.6714	0.0522493	0.00450359	0.00460784	-25.2546	-45.6213	-28.4737		x
AFG3L2	68	0.737732	0.640152	0.241522	-0.371178	0.124332	0.237742	-0.578858	-0.441118	-0.590328
MUT	69	0.855586	0.964826	0.191356	-0.394294	-0.029424	0.241186	-0.698794	-0.656294	-0.474144	0.532229	0.0305452	0.00650723	-8.16153	23.4082	34.0826	x
ACSF3	70	1.36271	1.08685	-0.121539	-0.420239	0.409991	0.115131	-0.536319	-0.999209	-0.897379	0.000567517	0.169048	0.00536814	-32.3095	-15.3688	25.5316		x
MRPS9	71	1.02092	0.51717	0.07934	-0.28397	-0.02288	0.07298	-0.23274	-0.64659	-0.50423	0.0157489	0.0218128	0.0703361	27.2742	76.724	39.6402	x			rev
MRPL1	72	1.21402	0.611303	0.632683	0.007153	0.344553	0.133103	-0.271567	-2.05686	-0.614397	0.00652349	0.0197902	0.124777	-22.4816	-36.0477	-19.1487		x
ZNF326	73	0.566471	0.580621	0.108381	0.212371	0.714561	-0.015389	-0.578079	-0.562579	-1.02636	0.000271955	0.000929904	0.509106	-58.2514	-55.1923	10.7314		x
H1F0	74	1.08845	0.846239	-0.223471	0.110759	1.11177	0.209189	-0.708091	-1.05461	-1.38023	0.00968216	0.0249539	0.0838555	-30.1622	-36.5575	-18.7673		x					nuclear body
GSDMA	75	0.643827	0.322397	-0.036493	0.363017	0.557767	0.016137	-0.937883	-0.582373	-0.346393	0.0359189	0.0203607	0.000123508	-24.8749	42.4492	73.4325	x	x
RPL29	76	1.18205	0.550632	0.268912	0.328162	0.591442	0.200392	-1.06782	-1.07611	-0.977668										gag
BCAS2	77	1.09249	1.27967	-0.457653	0.458287	1.08225	0.004697	-0.717553	-1.99388	-0.748293	0.000127137	0.00100715	0.0902054	-45.7392	-56.246	-18.4103		x				spliceosomal complex	nuclear body
CASP14	78	0.712366	-0.111784	0.065626	0.323486	1.30412	0.542156	-0.762664	-0.958394	-1.1149	0.0335546	0.000995574	0.0177332	-27.5282	-48.6086	-27.8698		x
HAL	79	0.591343	-0.197567	0.089933	0.455383	0.581173	0.440013	-0.402437	-0.843517	-0.714327
HMGN1	80	1.13368	-0.601154	0.352866	0.475046	1.0311	0.982466	-1.03281	-1.1748	-1.16637
YTHDF2	81	0.512412	0.120712	0.371082	1.28671	2.12089	1.58656	-0.671088	-2.6789	-2.64839	0.0011751	0.00324035	0.340043	-51.6436	-43.4929	23.6152		x						p-body
TGM3	82	0.544641	0.008111	-0.391449	0.726421	1.00922	0.472071	-0.308479	-1.10055	-0.959989	0.253989	0.00850309	0.0127355	-13.3842	-36.6327	-25.0392		x	Q08188
GGCT	83	0.210068	0.165898	0.098158	1.02157	0.988218	0.205348	-1.06049	-1.21479	-0.413972
HIST1H1E	84	0.924538	0.008258	-0.259162	0.691758	1.28595	0.987148	-1.46229	-1.33182	-0.844372	0.0285167	0.00853149	0.0135328	-31.3937	-47.9212	-31.929		x
ALOX12B	85	0.480974	0.254924	-0.039016	0.551214	1.10792	0.596734	-1.01131	-1.34308	-0.598376	0.23676	0.0457951	0.0174925	-18.2038	-34.8672	-21.4394		x
LOR	86	0.69523	0.03252	-0.19789	0.55602	0.86268	0.32988	-0.90243	-1.20185	-0.17416	0.00791047	0.00262541	0.186532	-41.8443	-48.5655	-18.0575		x
YBX3	87	0.449642	0.522752	-0.004048	0.755102	1.09271	1.03979	-1.65344	-1.03512	-1.1674									P16989
LGALS9	88	0.246529	0.397219	-0.062231	0.382109	0.761259	0.229429	-0.770871	-0.409121	-0.774321
PRRC2A	89	0.29319	0.28745	0.6289	1.16699	2.16742	1.89053	-2.12524	-2.23647	-2.07277	0.0777093	0.00908985	0.00664212	-20.752	-38.8546	-23.8742		x		gag
ATXN2L	90	0.279354	0.038244	0.198234	0.687134	1.45898	1.27552	-1.57317	-1.10907	-1.25525	0.00571066	0.034131	0.609124	-37.6166	-40.0363	-6.52323		x		gag	stress granule protein		nuclear body
SAFB	91	0.087542	0.059812	0.065142	0.430022	1.17064	0.974962	-1.11887	-0.931528	-0.737728										rev
MSI2	92	-0.108142	0.038648	0.043748	0.350748	1.01108	0.684958	-0.680842	-0.723002	-0.617192
TCOF1	93	0.649549	0.160379	0.239359	1.16689	1.77349	1.12325	-1.55884	-2.04495	-1.50912										gag
ILF3	94	0.480922	0.050912	0.027712	0.711032	1.28399	1.10788	-1.3063	-1.26244	-1.09372										tat, rev
HIST1H1D	95	0.430051	0.000351	-0.073399	0.531541	1.14214	0.728971	-0.975539	-0.999199	-0.784919	0.0294424	0.000150721	0.000160095	13.5231	-56.9573	-65.6388	x	x
ILF2	96	0.240167	0.280367	-0.076693	0.656737	1.32327	1.01137	-1.12375	-1.25074	-1.06071	3.60512e-07	0.000145142	0.0534991	-52.9771	-63.0497	-21.4418		x	Q12905	tat, rev
SLTM	97	0.430272	-0.101358	0.105962	1.57403	2.18891	1.81287	-2.21795	-1.95583	-1.83692													nuclear body
PRRC2C	98	0.843191	-0.257349	-0.144509	1.67597	1.94222	1.85725	-2.08541	-1.95566	-1.87571										gag
FAM133B	99	0.469841	-0.118289	-0.352499	1.65631	2.3639	1.64172	-1.89638	-2.14867	-1.61594										env
STRBP	100	0.380569	0.079679	-0.243311	0.480299	0.586819	1.67154	-1.89581	-0.704791	-0.354991
BCLAF1	101	0.615829	0.165139	-0.863651	0.873709	1.36918	1.31463	-1.69479	-1.56339	-0.216651													nuclear body
RBM12B	102	0.324553	0.563343	-0.904897	0.142673	1.28726	0.988493	-1.34726	-1.07806	0.023883	0.00887157	0.322142	0.0250579	-24.4767	-5.14707	22.676		x
SPRR2E	103	1.14696	0.016163	-1.27587	0.422653	1.3524	0.856103	-0.641797	-0.201357	-1.67527
ELAC2	104	1.13537	-0.244606	-1.49605	1.25349	1.29758	0.655254	-0.910496	-1.0142	-0.676366
HIST1H1C	105	1.42132	0.149626	-1.428	0.396526	1.54409	0.337686	-0.672354	-0.830654	-0.918224										gag
RRBP1	106	0.792958	0.391448	-1.06281	0.516828	0.770728	0.564228	-0.573552	-0.515802	-0.884022
PRPSAP2	107	1.88029	-1.42431	-1.24542	1.97998	1.16981	1.07428	-0.942812	-1.34489	-1.14691
AGK	108	1.50376	-1.85716	-0.848912	1.61463	1.55321	1.12464	-0.845292	-0.785482	-1.45938
MBNL1	109	0.355417	-0.372143	-0.340313	0.897397	1.52258	1.26075	-1.00338	-1.11519	-1.2051											stress granule protein
MBOAT7	110	0.362521	-0.174159	-0.375179	0.531061	1.41659	1.16521	-1.13473	-0.791349	-0.999969	0.00219359	0.000936283	0.0520285	49.4228	95.2443	31.9594	x
COPG2	111	0.450629	-0.302411	-0.577561	0.273779	1.44519	0.833589	-0.636531	-0.805641	-0.681041	3.83288e-05	0.0121301	0.000490522	-62.2817	-37.1843	68.9163		x
SRRM2	112	0.200713	-0.147197	-0.493137	0.299563	1.05311	1.01412	-0.650087	-0.751107	-0.525987	0.00796369	0.222672	0.00119301	-62.9838	-29.7365	103.65		x		tat, gag		spliceosomal complex	nuclear body
HIST1H1B	113	0.315024	0.044704	-0.550406	0.446224	1.0857	0.618694	-0.677516	-0.737066	-0.545366	0.00273472	0.00051172	0.00212083	-49.6928	-67.0028	-41.8903		x	P16401
BUB3	114	0.262369	-0.056931	-0.340291	0.272219	1.09816	0.533059	-0.768051	-0.522661	-0.477871	0.0545337	0.00384096	0.0386531	-24.7821	-46.3423	-26.1947		x
SRSF6	115	0.042249	0.240739	-0.479811	0.394819	0.963209	0.950299	-0.627611	-0.838131	-0.645761	0.00260249	0.243436	0.00333613	-38.4056	14.9006	87.4954		x					nuclear body
SON	116	0.085706	0.143156	-0.625054	0.350696	0.985096	0.984586	-0.696854	-0.806044	-0.421284										gag			nuclear body
TOMM40	117	-0.301921	0.055879	-0.346011	0.643539	1.28432	0.414319	-0.411591	-0.759911	-0.578621										env
IGHA1	118	0.584593	-0.087567	-0.997557	0.763473	1.14202	0.762803	0.181173	-0.993717	-1.35523									P01876
LTF	119	0.174823	0.158983	-0.504837	0.887493	0.949903	0.709263	-0.157267	-0.840937	-1.37743
RBBP6	120	-0.267986	0.375854	-0.096396	0.772394	0.724244	1.00843	-0.487416	-0.737056	-1.29208										tat			nuclear body
LCN1	121	0.080493	0.269563	-0.223407	0.951973	0.979543	0.225263	-0.525787	-0.603627	-1.15402
TTN	122	0.366297	2.31579	-1.47633	1.2819	1.28133	1.50726	-1.54537	-1.4479	-2.28295
IGLC3	123	-0.149061	0.418579	-2.4188	1.83506	1.29482	1.06439	0.645119	-2.47778	-0.212321
GNL1	124	-0.087718	-1.04698	-1.38782	2.07698	1.47372	0.590272	0.602522	-1.3987	-0.822288
DAZAP1	125	-0.065091	-2.06302	-0.409531	1.25838	1.31944	1.58519	1.03558	-2.0559	-0.605041	6.53196e-06	0.00239679	0.219947	-45.8738	-55.2459	-18.8441		x		rev
IPO4	126	-0.932008	-0.739458	0.050982	1.12586	0.708912	1.11296	-0.288008	-0.588138	-0.451108										vpr, gag-pol
FRYL	127	-0.484286	0.014514	0.203484	1.49417	0.088814	1.18603	-0.788766	-1.01952	-0.694456
DERL1	128	-0.053909	-0.046379	0.066161	-0.824759	2.02413	0.515731	-0.496489	-0.690299	-0.494189
CDV3	129	-0.136304	-0.852674	-0.499624	0.449256	1.57624	1.21979	-0.693104	-0.522434	-0.541134										gag
SPEN	130	-0.426101	-0.763711	-0.433571	0.248359	1.96256	1.61058	-0.730751	-0.780421	-0.686941	0.00473211	1.51394e-06	4.46901e-05	-35.6833	-77.23	-64.6097		x		tat
NEK7	131	-0.338084	-0.924504	-0.474674	0.553766	2.27056	0.736256	-0.130694	-0.738604	-0.954014										tat
TIMM50	132	-0.486927	-0.798427	-0.073477	0.695283	1.3456	0.710953	-0.254237	-0.504557	-0.634217													nuclear body
UPF1	133	-0.319593	-0.584573	-0.686593	1.45069	2.3145	1.98997	-1.46624	-1.46467	-1.23347	0.0042741	0.0017853	0.311679	-68.0772	-75.0562	-12.6039		x				spliceosomal complex		p-body
TOP1	134	-0.260217	-0.361967	-0.572727	1.21063	1.73104	1.2469	-1.06044	-1.11809	-0.815147														p-body
SBNO1	135	-0.735343	-0.146873	-0.394673	0.894137	2.04422	2.27483	-1.54211	-1.23636	-1.15781	0.0129247	0.0047089	0.291498	-37.5079	-47.2108	-12.996		x
NXF1	136	-0.378586	-0.280536	-0.136006	0.894864	1.8996	1.86829	-1.70413	-1.05919	-1.10433													nuclear body
TARS2	137	-0.479176	-0.551166	0.249484	0.303664	1.6177	1.63748	-1.04263	-0.600806	-1.13457
RFC3	138	-1.27185	-0.766022	-1.23301	0.039868	1.51038	1.8357	0.211248	0.197568	-0.523872
BRI3BP	139	-1.35756	-1.22029	-1.22579	1.22117	1.3148	1.85016	-0.322266	-0.195526	-0.064726
CISD2	140	-0.849718	-0.748578	-0.811118	0.657082	1.31896	1.42487	-0.368668	-0.704208	0.081372
TMEM33	141	-0.429221	-0.078741	-0.813521	0.604689	0.987369	0.955059	-0.446721	-0.422681	-0.356231
STAU2	142	-0.22892	-0.97026	-2.28868	0.38001	2.78194	2.43968	-1.12499	-0.14312	-0.84566	0.0163147	0.00267053	0.132263	-44.6974	-56.961	-17.7356		x		tat
SCFD1	143	-1.3209	0.150838	-0.062032	-0.351172	1.21865	2.64694	-0.946042	-0.646622	-0.689652
RBMS1	144	-2.20213	-0.001244	-0.816304	0.875796	1.45424	3.56168	-0.885484	-1.15297	-0.833564	0.566952	0.0497804	0.0426498	5.02694	38.6435	29.7386	x
CSE1L	145	-0.275299	-0.541769	-0.653209	-0.388409	0.693321	0.153161	0.198111	0.421581	0.392511	4.18777e-05	0.000672537	0.153865	-70.6216	-74.4542	-19.8195		x
TNPO1	146	-0.447816	-0.593206	-0.636596	0.080634	0.141884	0.656234	0.170064	0.260304	0.368494										rev
ACTL6A	147	-1.53013	-1.16953	-1.38637	0.342817	0.920787	1.90099	0.310647	0.114087	0.496717										tat
CLPTM1L	148	-0.906551	-0.882801	-0.306071	0.197339	0.450159	0.799729	0.208399	0.370149	0.069649
TRA2A	149	-1.74011	-2.37583	-0.05852	0.98646	0.99656	0.9666	0.35409	0.39755	0.4732	0.0181979	0.00196695	0.787604	-50.611	-58.6157	-4.20526		x				spliceosomal complex
NCAPG	150	-0.670331	-0.516641	-0.610311	0.874129	1.00716	-0.518021	-0.046401	0.130729	0.349689										tat
OSBPL8	151	-0.894542	-0.845382	-0.578822	0.718108	1.31425	0.044128	-0.039102	0.037188	0.244178
NUP54	152	-1.62919	-0.369844	-0.997884	0.080556	1.88384	0.233686	0.378256	0.221096	0.199496	4.79913e-06	2.93946e-05	2.54736e-05	-31.8333	-73.2588	-60.7009		x
AP1M1	153	-0.967718	-0.721048	-0.784378	0.614702	0.774712	0.146382	0.703852	-0.184848	0.418342										nef, env
APOD	154	-0.438974	-1.75851	-1.76613	0.463296	0.627746	1.56561	-1.27966	4.08825	-1.5016									P05090
MTHFD2	155	1.36237	1.3817	0.986957	-1.69219	-0.041833	-2.26131	0.055637	0.022487	0.186197										nef
RANBP1	156	0.247484	0.256864	0.187014	-0.311906	-0.233926	-2.64771	0.789444	0.884464	0.828264									P43487	vpu
RBM4	157	0.083804	0.895674	0.812414	-1.28941	-0.511196	-2.01458	0.037544	1.4121	0.573634	0.14771	0.000787903	9.9183e-05	-17.2235	52.4399	84.27	x
RPS26	158	1.24365	1.17771	1.40112	-1.85019	-2.63761	-0.837967	1.82389	-1.28864	0.968013
GRHPR	159	0.137334	0.743584	1.14827	-0.161836	-2.96283	-0.619436	0.585774	0.193544	0.935584
TOP2B	160	-0.170881	0.661679	-0.363181	-0.280871	-0.928211	-0.603611	0.597359	0.582549	0.505169
RPS17	161	-0.657577	-0.023827	-0.365597	0.602593	-0.422117	-0.798157	0.389193	0.452523	0.822963	0.00783569	0.00131634	0.00344781	-51.6115	-68.1027	-33.124		x		rev
VARS	162	-0.471462	-0.301992	-0.043152	0.003608	-0.281602	-0.167342	0.355358	0.429768	0.476818	0.000898495	1.69659e-05	0.00488401	-63.1527	-75.2594	-33.7508		x
EPRS	163	-0.39625	-0.2477	-0.03463	-0.10562	-0.26186	-0.22562	0.40975	0.38688	0.47505	0.00374111	0.00248763	0.0174933	-59.8167	-70.5274	-26.6254		x		gag
COPG1	164	-0.853296	-0.461226	0.076054	-0.140726	-0.492916	-0.133896	0.815094	0.628144	0.562764
NUP155	165	-0.502883	-0.337823	-0.112623	0.170087	-0.264283	-0.346673	0.556797	0.544397	0.293007
TMED9	166	-0.783972	-0.366152	-0.161882	0.332588	-0.535332	-0.139422	0.591438	0.364808	0.697928										rev
DYNC1H1	167	-0.250083	-0.086693	-0.037833	0.142617	-0.636863	-0.395093	0.439937	0.381707	0.442307	0.000398806	0.00387024	0.0208817	-48.8625	-61.442	-24.2925		x	Q14204	vpr, rev
EEF1A1P5	168	-0.300439	-0.070499	-0.111919	-0.032219	-0.511489	-0.270509	0.332981	0.477511	0.486581
XRCC6	169	-0.380271	-0.036281	-0.201481	0.045829	-0.566871	-0.265211	0.456949	0.421189	0.526149										gag-pol
CKAP5	170	-0.543652	-0.231282	0.110788	0.040778	-0.953102	-0.273892	0.437568	0.686578	0.726218
GANAB	171	-0.243561	-0.357551	-0.075381	0.105759	-0.408871	-0.074741	0.383729	0.311119	0.359499										env
SPTBN1	172	-0.194313	-0.330583	-0.083643	-0.025783	-0.429123	-0.124913	0.372767	0.359967	0.455627									Q01082	rev
VCP	173	-0.313067	-0.342087	0.007273	-0.043667	-0.511617	-0.125987	0.466113	0.378493	0.484543										env
PAICS	174	-0.134551	-0.174441	-0.264981	0.055319	-0.398931	-0.103421	0.360799	0.376739	0.283469									P22234
CAD	175	-0.112277	-0.212837	-0.129017	-0.041757	-0.296667	-0.296447	0.347313	0.293883	0.447803	2.7497e-05	0.00225738	0.152103	-49.719	-61.2966	-25.708		x
VAPA	176	-0.881681	-0.023591	0.628059	-0.331061	-0.921931	-0.654441	0.729429	0.831189	0.624029										env
AIMP2	177	-1.0346	0.189179	0.656949	0.142079	-1.8587	-0.496691	0.822669	0.909129	0.669989										gag
ACTG2	178	-2.50144	-0.059682	1.86263	0.412338	-1.83908	-0.867332	1.6009	0.557448	0.834228
DLD	179	-0.480059	0.555011	1.41838	0.397771	-1.72977	-2.01647	0.282501	0.897511	0.675121	0.000321763	0.000346746	0.415324	67.4321	58.9239	-5.73239	x
RPL21	180	-0.338176	-0.137016	-0.252586	-0.553116	0.012294	-0.414366	0.648484	0.282814	0.751664
SCCPDH	181	-0.525284	-0.137554	-0.549834	-0.191384	-0.050004	-0.198924	0.552386	0.423436	0.677166
DNM2	182	-0.40474	-0.13531	-0.48852	-0.17784	0.03674	-0.21797	0.57169	0.36112	0.45483	0.00689197	0.00621402	0.0335995	-39.9771	-51.6165	-21.3731		x
SEPT2	183	-0.277974	-0.296264	-0.236804	-0.150874	0.027376	0.007406	0.204976	0.267686	0.454476
NCLN	184	-0.566952	-0.609202	-0.648722	-0.051462	0.439138	-0.349362	0.275058	0.676858	0.834648	0.0108877	0.0216917	0.262751	33.7243	80.9531	26.0939	x
ATP5F1	185	-0.198084	-0.619254	-0.416824	0.112216	-0.214554	-0.233114	0.317216	0.408706	0.843696	0.00111677	0.000676818	0.00231165	-47.0024	-66.9724	-45.6377		x		vpu
RFC4	186	-0.403616	-0.549826	-0.246196	-0.043476	0.488204	-0.733866	0.395794	0.733364	0.359614
U2AF1	187	-0.786072	-0.786932	0.139928	0.408058	0.161318	-1.04488	0.868568	0.571848	0.468168	0.00197186	0.0677315	0.00406088	-90.9207	-47.4107	473.731		x		rev
RPL14	188	-0.286213	-0.534323	-0.141453	-0.226273	-0.320223	0.064707	0.347977	0.491007	0.604797
AGPS	189	-0.280104	-0.379274	-0.210484	-0.194944	-0.226144	0.110766	0.259736	0.466496	0.453956										vpr
EIF3C	190	-0.312317	-0.384537	-0.372577	-0.114037	-0.512127	0.122653	0.371993	0.422793	0.778153										gag-pol
RPS8	191	-0.191557	-0.185517	-0.324687	-0.211387	-0.260227	-0.041677	0.350383	0.341513	0.523153
PSMD14	192	-0.793272	-0.714832	-1.30694	-0.970592	-1.19202	0.217838	1.4511	1.62095	1.68778	0.000411652	0.000551097	0.218368	-77.6274	-84.4258	-101.329		x
SF3B2	193	-0.346682	-0.205402	-0.274712	-0.227362	-0.385042	-0.090052	0.535618	0.470598	0.523038	0.00135046	0.00655333	0.147984	-71.6172	-61.8076	50.8471		x		vpr
RHOA	194	-0.226914	-0.422954	-0.364314	-0.590404	-0.595184	-0.016564	0.791476	0.655016	0.769846
NACA	195	-0.004079	-0.288879	-0.187779	-0.446679	-0.460199	0.061651	0.452131	0.481911	0.391921
HAT1	196	-0.632664	-0.415564	-0.158004	-0.187294	-0.235224	-0.057944	0.479746	0.644896	0.562056										vpr
HM13	197	-0.759864	-0.392114	-0.145024	-0.384914	-0.258414	0.157616	0.684906	0.721446	0.376366										env
EIF4G2	198	-0.426647	-0.586497	0.085213	-0.313227	-0.325897	0.041823	0.513433	0.556713	0.455083
LARS	199	-0.073484	-0.241574	-0.098034	-0.279894	-0.786004	-0.158004	0.437276	0.582526	0.617196	0.36265	0.0379509	0.00861197	-22.5822	-57.0651	-56.1952		x	Q9P2J5	gag
SRP72	200	-0.41262	-0.02769	0.11126	-0.6134	-0.80595	-0.12762	0.54214	0.63321	0.70067	0.00284321	0.00500604	0.385661	-64.9925	-61.7528	13.583		x
GALNT2	201	-0.294977	-0.146827	0.282623	-0.557947	-1.20072	-0.245287	0.627683	0.741223	0.794223
RPS4X	202	-0.286103	-0.336863	0.006877	-0.245193	-0.517473	-0.033293	0.472427	0.348487	0.591137										rev
RPL10	203	-0.441277	-0.533047	0.039223	-0.247487	-0.610267	-0.124647	0.367843	0.505843	1.04381
MTA2	204	-0.390511	-0.557801	0.310939	-0.488081	-0.694631	-0.186341	0.507599	0.734669	0.764159										vpr, tat
BCAP31	205	-0.388187	-0.864037	0.612993	-0.264387	-1.39746	-0.208947	0.953503	0.717813	0.838703										nef, env
DOCK2	206	-0.275768	-0.533758	0.473392	-0.488928	-0.363158	-0.769188	0.487602	0.566682	0.903122	1.82617e-06	0.00313463	0.558115	-60.8075	-69.9005	-19.0079		x
RPLP2	207	-0.389822	-0.466892	0.823518	-0.116812	-1.03155	-0.913152	0.361538	0.987798	0.745378
CANX	208	-0.929097	-0.785057	1.01399	-0.248947	-1.32651	-0.981017	1.09132	1.2066	0.958703										env
HMGB2	209	-0.252212	-0.119672	1.21017	-0.709812	-0.770962	-1.39668	0.743628	0.804948	0.490598
MAT2B	210	1.09723	-1.53326	0.770791	-0.809089	-0.844139	-0.803069	0.863421	1.18686	0.071251
RPS15	211	0.401166	-0.792774	0.876496	-0.850254	-0.508714	-1.37044	0.518506	1.12373	0.602296
BZW2	212	0.94845	-0.77163	0.57603	-0.84162	-0.55326	-1.69678	1.06447	0.55053	0.72381										tat
																	16	71
