# Supplementary material for: Identification of host proteins differentially associated with HIV-1 RNA splice variants
Source: eLife. 2021 Feb 25;10:e62470. doi: 10.7554/eLife.62470 (PMC7906601; doi:10.7554/eLife.62470)
Supplement: Supplementary file 6. — Related to Figure 3 and Figure 3—figure supplement 1. [file elife-62470-supp6.xlsx]

## Sheet: Supplementary File 6
Supplementary File 6: Western blot quantitation; with and without siRNA KD; with and without HIV-1 infection. Related to Figure 3 and Figure 3-figure supplement 1.
	Target KD		CTRL KD		Target KD		CTRL KD		Target KD		CTRL KD		% KD (-) inf	% KD (+) inf
	HSP90 band	HSP90 band	HSP90 band	HSP90 band	Target band	Target band	Target band	Target band	Target (Normalized to HSP90)	Target (Normalized to HSP90)	Target (Normalized to HSP90)	Target (Normalized to HSP90)	Target (Normalized to HSP90)	Target (Normalized to HSP90)
Target Protein	(-) inf	(+) inf	(-) inf	(+) inf	(-) inf	(+) inf	(-) inf	(+) inf	(-) inf	(+) inf	(-) inf	(+) inf	(-) inf	(+) inf
BUB3	0.467	0.525	0.487	0.387	1.08	0.875	4.66	5.93	2.21766	2.26098	9.97859	11.2952	77.7758	79.9829
CSDE1	0.0792	0.0835	0.25	0.23	0.0852	0.123	0.355	0.478	0.3408	0.534783	4.48232	5.72455	92.3968	90.6581
DHX30	0.672	0.59	0.453	2.79	0.278	0.243	0.434	2.36	0.41369	0.411864	0.958057	0.845878	56.8199	51.3093
DLD	0.467	0.525	0.272	0.436	0.0364	0.0677	1.06	1.25	0.133824	0.155275	2.26981	2.38095	94.1042	93.4784
DNM2	0.412	0.498	0.0147	0.0185	0.0108	0.0212	0.267	0.932	0.734694	1.14595	0.648058	1.87149	-13.3685	38.7681
DYNC1H1	0.107	0.151	0.0092	0.0126	NA	NA	NA	NA	NA	NA	NA	NA	NA	NA
FAM120A	0.377	0.22	0.338	0.398	0.72	0.486	1.59	2.05	1.90981	2.20909	4.70414	5.15075	59.4014	57.1113
G3BP1	0.351	0.264	0.231	0.266	1.58	1.66	6.92	6.02	4.50142	6.28788	29.9567	22.6316	84.9736	72.2163
GSDMA	0.529	0.449	0.682	0.693	0.0834	0.0358	0.146	0.119	0.157656	0.0797327	0.214076	0.171717	26.3552	53.5674
HNRNPR	0.461	0.418	0.443	0.511	0.0627	0.0631	1.4	1.6	0.136009	0.150957	3.16027	3.13112	95.6963	95.1788
IGF2BP3	0.00442	0.0102	0.467	0.525	0.155	0.257	9.58	11.1	35.0679	25.1961	20.5139	21.1429	-70.9467	-19.1706
LRPPRC	0.383	0.359	0.412	0.498	2.3	2.52	24	27.4	6.00522	7.0195	58.2524	55.0201	89.691	87.2419
MBOAT7	0.395	0.353	0.231	0.266	0.0204	0.0182	0.112	0.118	0.0516456	0.0515581	0.484848	0.443609	89.3481	88.3776
NCLN	0.396	0.354	0.393	0.436	0.476	0.519	4.05	4.08	1.20202	1.4661	10.3053	9.3578	88.336	84.3328
RBM4	0.115	0.155	0.0633	0.0785	1.75	1.59	11.4	6.42	27.6461	20.2548	99.1304	41.4194	72.1114	51.0983
RBMX	0.443	0.511	0.0533	0.0524	0.0192	0.0472	0.556	0.663	0.360225	0.900763	1.25508	1.29746	71.2986	30.5746
RPL15	0.716	0.742	5.17	3.34	0.0711	0.167	0.408	0.621	0.0993017	0.225067	0.0789168	0.185928	-25.8308	-21.0507
SRRM2	0.00194	0.00351	0.107	0.151	NA	NA	NA	NA	NA	NA	NA	NA	NA	NA
SRSF6	0.393	0.436	0.203	0.263	0.189	0.313	0.782	1.02	0.931034	1.19011	1.98982	2.33945	53.2102	49.1285
TRIM56	0.338	0.398	0.409	0.467	0.686	0.908	2	2.6	1.67726	1.94433	5.91716	6.53266	71.6543	70.2369
