# Supplementary material for: Identification of host proteins differentially associated with HIV-1 RNA splice variants
Source: eLife. 2021 Feb 25;10:e62470. doi: 10.7554/eLife.62470 (PMC7906601; doi:10.7554/eLife.62470)
Supplement: Supplementary file 8. — Related to Figure 4 and Figure 4—figure supplement 1. [file elife-62470-supp8.xlsx]

## Sheet: Supplementary File 8
Supplementary File 8: Host protein immunofluorescence in cells with and without siRNA KD. Related to Figures 4 and Figure 4-figure supplement 1.

## Sheet: BUB3
	Label	Area	Mean	Min	Max	BX	BY	Width	Height	IntDen	%Area	RawIntDen
1	Plate2_40X_100%_BUB3001.nd2:c:1/4 - Plate2_40X_100%_BUB3001.nd2 (series 1)	807527	149.126	0	6772	0	0	898.625	898.625	1.20423e+08	93.661	4560393747			Gag	Protein	CFP	Dapi
2	Plate2_40X_100%_BUB3001.nd2:c:2/4 - Plate2_40X_100%_BUB3001.nd2 (series 1)	807527	692.822	0	53996	0	0	898.625	898.625	5.59472e+08	99.25	21187124146		Plate 2 (KD)	1.20423e+08	5.59472e+08	7.47687e+07	2.89055e+08
3	Plate2_40X_100%_BUB3001.nd2:c:3/4 - Plate2_40X_100%_BUB3001.nd2 (series 1)	807527	92.59	0	3476	0	0	898.625	898.625	7.47687e+07	90.531	2831475544		Plate 4 (No KD)	7.1232e+07	5.34744e+08	5.28237e+07	3.37084e+07
4	Plate2_40X_100%_BUB3001.nd2:c:4/4 - Plate2_40X_100%_BUB3001.nd2 (series 1)	807527	357.951	0	12492	0	0	898.625	898.625	2.89055e+08	97.398	10946468865		Normalized to Dapi	Gag	Protein	CFP
5	Plate4_40X_100%_BUB3.nd2:c:1/4 - Plate4_40X_100%_BUB3.nd2 (series 1)	807527	88.21	0	39500	0	0	898.625	898.625	7.1232e+07	90.361	2697544614		Protein KD	0.416609	1.93552	0.258666		%KD
6	Plate4_40X_100%_BUB3.nd2:c:2/4 - Plate4_40X_100%_BUB3.nd2 (series 1)	807527	662.2	0	64484	0	0	898.625	898.625	5.34744e+08	98.015	20250674062		No KD	2.11318	15.8638	1.56708		87.7992
7	Plate4_40X_100%_BUB3.nd2:c:3/4 - Plate4_40X_100%_BUB3.nd2 (series 1)	807527	65.414	0	3674	0	0	898.625	898.625	5.28237e+07	86.616	2000423044
8	Plate4_40X_100%_BUB3.nd2:c:4/4 - Plate4_40X_100%_BUB3.nd2 (series 1)	807527	41.743	0	2624	0	0	898.625	898.625	3.37084e+07	88.647	1276531225

## Sheet: CSDE1
	Label	Area	Mean	Min	Max	BX	BY	Width	Height	IntDen	%Area	RawIntDen
1	Plate2_40X_100%_CSDE1.nd2:c:1/4 - Plate2_40X_100%_CSDE1.nd2 (series 1)	807527	143.818	0	7272	0	0	898.625	898.625	1.16137e+08	93.935	4398089290			Gag	Protein	CFP	Dapi
2	Plate2_40X_100%_CSDE1.nd2:c:2/4 - Plate2_40X_100%_CSDE1.nd2 (series 1)	807527	183.603	0	15130	0	0	898.625	898.625	1.48264e+08	97.149	5614742940		Plate 2 (KD)	1.16137e+08	1.48264e+08	7.00515e+07	4.92129e+08
3	Plate2_40X_100%_CSDE1.nd2:c:3/4 - Plate2_40X_100%_CSDE1.nd2 (series 1)	807527	86.748	0	3015	0	0	898.625	898.625	7.00515e+07	91.598	2652837986		Plate 4 (No KD)	6.94922e+07	2.07973e+08	3.7884e+07	9.87452e+07
4	Plate2_40X_100%_CSDE1.nd2:c:4/4 - Plate2_40X_100%_CSDE1.nd2 (series 1)	807527	609.427	0	16642	0	0	898.625	898.625	4.92129e+08	99.088	18636841096		Normalized to Dapi	Gag	Protein	CFP
5	Plate4_40X_100%_CSDE1001.nd2:c:1/4 - Plate4_40X_100%_CSDE1001.nd2 (series 1)	807527	86.056	0	20262	0	0	898.625	898.625	6.94922e+07	91.62	2631656874		Protein KD	0.235989	0.301271	0.142344		%KD
6	Plate4_40X_100%_CSDE1001.nd2:c:2/4 - Plate4_40X_100%_CSDE1001.nd2 (series 1)	807527	257.543	0	64902	0	0	898.625	898.625	2.07973e+08	96.291	7875907043		No KD	0.703753	2.10616	0.383654		85.6957
7	Plate4_40X_100%_CSDE1001.nd2:c:3/4 - Plate4_40X_100%_CSDE1001.nd2 (series 1)	807527	46.914	0	3037	0	0	898.625	898.625	3.7884e+07	87.737	1434660571
8	Plate4_40X_100%_CSDE1001.nd2:c:4/4 - Plate4_40X_100%_CSDE1001.nd2 (series 1)	807527	122.281	0	4523	0	0	898.625	898.625	9.87452e+07	93.858	3739461995

## Sheet: DHX30
	Label	Area	Mean	Min	Max	BX	BY	Width	Height	IntDen	%Area	RawIntDen
1	Plate2_40X_100%_DHX30001.nd2:c:1/4 - Plate2_40X_100%_DHX30001.nd2 (series 1)	807527	183.572	0	30899	0	0	898.625	898.625	1.4824e+08	95.647	5613807684			Gag	Protein	CFP	Dapi
2	Plate2_40X_100%_DHX30001.nd2:c:2/4 - Plate2_40X_100%_DHX30001.nd2 (series 1)	807527	193.872	0	2885	0	0	898.625	898.625	1.56557e+08	97.434	5928784199		Plate 2 (KD)	1.4824e+08	1.56557e+08	1.17849e+08	3.38729e+08
3	Plate2_40X_100%_DHX30001.nd2:c:3/4 - Plate2_40X_100%_DHX30001.nd2 (series 1)	807527	145.939	0	2943	0	0	898.625	898.625	1.17849e+08	93.747	4462932635		Plate 4 (No KD)	1.13021e+08	1.03294e+08	6.5388e+07	6.45816e+07
4	Plate2_40X_100%_DHX30001.nd2:c:4/4 - Plate2_40X_100%_DHX30001.nd2 (series 1)	807527	419.465	0	7912	0	0	898.625	898.625	3.38729e+08	98.176	12827607442		Normalized to Dapi	Gag	Protein	CFP
5	Plate4_40X_100%_DHX30001.nd2:c:1/4 - Plate4_40X_100%_DHX30001.nd2 (series 1)	807527	139.959	0	8730	0	0	898.625	898.625	1.13021e+08	93.667	4280077343		Protein KD	0.437635	0.462189	0.347916		%KD
6	Plate4_40X_100%_DHX30001.nd2:c:2/4 - Plate4_40X_100%_DHX30001.nd2 (series 1)	807527	127.914	0	1964	0	0	898.625	898.625	1.03294e+08	93.808	3911711800		No KD	1.75005	1.59943	1.01249		71.1028
7	Plate4_40X_100%_DHX30001.nd2:c:3/4 - Plate4_40X_100%_DHX30001.nd2 (series 1)	807527	80.973	0	2304	0	0	898.625	898.625	6.5388e+07	91.051	2476233074
8	Plate4_40X_100%_DHX30001.nd2:c:4/4 - Plate4_40X_100%_DHX30001.nd2 (series 1)	807527	79.975	0	3007	0	0	898.625	898.625	6.45816e+07	92.484	2445694006

## Sheet: DLD
	Label	Area	Mean	Min	Max	BX	BY	Width	Height	IntDen	%Area	RawIntDen
1	Plate2_40X_100%_DLD001.nd2:c:1/4 - Plate2_40X_100%_DLD001.nd2 (series 1)	807527	35.237	0	5207	0	0	898.625	898.625	2.84549e+07	86.939	1077580742			Gag	Protein	CFP	Dapi
2	Plate2_40X_100%_DLD001.nd2:c:2/4 - Plate2_40X_100%_DLD001.nd2 (series 1)	807527	35.332	0	1442	0	0	898.625	898.625	2.85315e+07	87.765	1080484473		Plate 2 (KD)	2.84549e+07	2.85315e+07	3.42256e+07	1.54732e+08
3	Plate2_40X_100%_DLD001.nd2:c:3/4 - Plate2_40X_100%_DLD001.nd2 (series 1)	807527	42.383	0	1376	0	0	898.625	898.625	3.42256e+07	87.165	1296117292		Plate 4 (No KD)	1.31108e+08	2.30816e+07	6.37844e+07	1.73074e+08
4	Plate2_40X_100%_DLD001.nd2:c:4/4 - Plate2_40X_100%_DLD001.nd2 (series 1)	807527	191.613	0	6845	0	0	898.625	898.625	1.54732e+08	95.836	5859690593		Normalized to Dapi	Gag	Protein	CFP
5	Plate4_40X_100%_DLD.nd2:c:1/4 - Plate4_40X_100%_DLD.nd2 (series 1)	807527	162.358	0	7101	0	0	898.625	898.625	1.31108e+08	94.444	4965053096		Protein KD	0.183897	0.184393	0.221192		%KD
6	Plate4_40X_100%_DLD.nd2:c:2/4 - Plate4_40X_100%_DLD.nd2 (series 1)	807527	28.583	0	864	0	0	898.625	898.625	2.30816e+07	86.889	874095273		No KD	0.757529	0.133363	0.368539		-38.2642
7	Plate4_40X_100%_DLD.nd2:c:3/4 - Plate4_40X_100%_DLD.nd2 (series 1)	807527	78.987	0	4055	0	0	898.625	898.625	6.37844e+07	90.712	2415502994
8	Plate4_40X_100%_DLD.nd2:c:4/4 - Plate4_40X_100%_DLD.nd2 (series 1)	807527	214.326	0	4922	0	0	898.625	898.625	1.73074e+08	96.534	6554274174

## Sheet: DNM2
	Label	Area	Mean	Min	Max	BX	BY	Width	Height	IntDen	%Area	RawIntDen
1	Plate2_40X_100%_DNM2001.nd2:c:1/4 - Plate2_40X_100%_DNM2001.nd2 (series 1)	807527	105.054	0	15490	0	0	898.625	898.625	8.4834e+07	91.315	3212650047			Gag	Protein	CFP	Dapi
2	Plate2_40X_100%_DNM2001.nd2:c:2/4 - Plate2_40X_100%_DNM2001.nd2 (series 1)	807527	38.617	0	5838	0	0	898.625	898.625	3.11839e+07	87.423	1180929468		Plate 2 (KD)	8.4834e+07	3.11839e+07	4.89508e+07	1.07286e+08
3	Plate2_40X_100%_DNM2001.nd2:c:3/4 - Plate2_40X_100%_DNM2001.nd2 (series 1)	807527	60.618	0	2091	0	0	898.625	898.625	4.89508e+07	87.785	1853756328		Plate 4 (No KD)	6.60281e+07	4.9398e+07	4.01726e+07	4.84941e+07
4	Plate2_40X_100%_DNM2001.nd2:c:4/4 - Plate2_40X_100%_DNM2001.nd2 (series 1)	807527	132.857	0	6427	0	0	898.625	898.625	1.07286e+08	93.883	4062900340		Normalized to Dapi	Gag	Protein	CFP
5	Plate4_40X_100%_DNM2.nd2:c:1/4 - Plate4_40X_100%_DNM2.nd2 (series 1)	807527	81.766	0	8043	0	0	898.625	898.625	6.60281e+07	90.604	2500474019		Protein KD	0.790728	0.290662	0.456264		%KD
6	Plate4_40X_100%_DNM2.nd2:c:2/4 - Plate4_40X_100%_DNM2.nd2 (series 1)	807527	61.172	0	2257	0	0	898.625	898.625	4.9398e+07	89.51	1870692178		No KD	1.36157	1.01864	0.828402		71.4657
7	Plate4_40X_100%_DNM2.nd2:c:3/4 - Plate4_40X_100%_DNM2.nd2 (series 1)	807527	49.748	0	2226	0	0	898.625	898.625	4.01726e+07	86.948	1521329779
8	Plate4_40X_100%_DNM2.nd2:c:4/4 - Plate4_40X_100%_DNM2.nd2 (series 1)	807527	60.053	0	3280	0	0	898.625	898.625	4.84941e+07	91.836	1836463415

## Sheet: DYNC1H1
	Label	Area	Mean	Min	Max	BX	BY	Width	Height	IntDen	%Area	RawIntDen
1	Plate2_40X_100%_DYNC1H1.nd2:c:1/4 - Plate2_40X_100%_DYNC1H1.nd2 (series 1)	350018	93.02	0	6251	115.7	180.7	685.1	510.9	3.25588e+07	88.332	1232995132			Gag	Protein	CFP	Dapi
2	Plate2_40X_100%_DYNC1H1.nd2:c:2/4 - Plate2_40X_100%_DYNC1H1.nd2 (series 1)	350018	35.848	0	644	115.7	180.7	685.1	510.9	1.25473e+07	86.53	475164727		Plate 2 (KD)	3.25588e+07	1.25473e+07	2.19581e+07	1.64635e+07
3	Plate2_40X_100%_DYNC1H1.nd2:c:3/4 - Plate2_40X_100%_DYNC1H1.nd2 (series 1)	350018	62.734	0	1825	115.7	180.7	685.1	510.9	2.19581e+07	89.766	831548447		Plate 4 (No KD)	2.08566e+07	1.58307e+07	1.27365e+07	1.118e+07
4	Plate2_40X_100%_DYNC1H1.nd2:c:4/4 - Plate2_40X_100%_DYNC1H1.nd2 (series 1)	350018	47.036	0	2025	115.7	180.7	685.1	510.9	1.64635e+07	87.088	623470068		Normalized to Dapi	Gag	Protein	CFP
5	Plate4_40X_100%_DYNC1H1001.nd2:c:1/4 - Plate4_40X_100%_DYNC1H1001.nd2 (series 1)	373456	55.847	0	10761	66.3	182	660.4	565.5	2.08566e+07	88.126	789834630		Protein KD	1.97763	0.762129	1.33374		%KD
6	Plate4_40X_100%_DYNC1H1001.nd2:c:2/4 - Plate4_40X_100%_DYNC1H1001.nd2 (series 1)	373456	42.39	0	3359	66.3	182	660.4	565.5	1.58307e+07	88.871	599505904		No KD	1.86553	1.41599	1.13922		46.1769
7	Plate4_40X_100%_DYNC1H1001.nd2:c:3/4 - Plate4_40X_100%_DYNC1H1001.nd2 (series 1)	373456	34.104	0	1863	66.3	182	660.4	565.5	1.27365e+07	85.464	482327916
8	Plate4_40X_100%_DYNC1H1001.nd2:c:4/4 - Plate4_40X_100%_DYNC1H1001.nd2 (series 1)	373456	29.936	0	2292	66.3	182	660.4	565.5	1.118e+07	87.136	423383506

## Sheet: FAM120A
	Label	Area	Mean	Min	Max	BX	BY	Width	Height	IntDen	%Area	RawIntDen
1	Plate2_40X_100%_FAM120A001.nd2:c:1/4 - Plate2_40X_100%_FAM120A001.nd2 (series 1)	807527	125.456	0	10919	0	0	898.625	898.625	1.01309e+08	93.537	3836542161			Gag	Protein	CFP	Dapi
2	Plate2_40X_100%_FAM120A001.nd2:c:2/4 - Plate2_40X_100%_FAM120A001.nd2 (series 1)	807527	22.984	0	528	0	0	898.625	898.625	1.85604e+07	84.368	702877497		Plate 2 (KD)	1.01309e+08	1.85604e+07	6.77763e+07	1.8077e+08
3	Plate2_40X_100%_FAM120A001.nd2:c:3/4 - Plate2_40X_100%_FAM120A001.nd2 (series 1)	807527	83.931	0	2916	0	0	898.625	898.625	6.77763e+07	90.41	2566676574		Plate 4 (No KD)	5.13825e+07	1.88539e+07	3.33902e+07	3.13943e+07
4	Plate2_40X_100%_FAM120A001.nd2:c:4/4 - Plate2_40X_100%_FAM120A001.nd2 (series 1)	807527	223.857	0	4353	0	0	898.625	898.625	1.8077e+08	96.433	6845743641		Normalized to Dapi	Gag	Protein	CFP
5	Plate4_40X_100%_FAM120A.nd2:c:1/4 - Plate4_40X_100%_FAM120A.nd2 (series 1)	807527	63.629	0	4766	0	0	898.625	898.625	5.13825e+07	89.108	1945844713		Protein KD	0.560427	0.102674	0.37493		%KD
6	Plate4_40X_100%_FAM120A.nd2:c:2/4 - Plate4_40X_100%_FAM120A.nd2 (series 1)	807527	23.348	0	1056	0	0	898.625	898.625	1.88539e+07	84.724	713992620		No KD	1.63668	0.600551	1.06357		82.9034
7	Plate4_40X_100%_FAM120A.nd2:c:3/4 - Plate4_40X_100%_FAM120A.nd2 (series 1)	807527	41.349	0	2717	0	0	898.625	898.625	3.33902e+07	86.204	1264479178
8	Plate4_40X_100%_FAM120A.nd2:c:4/4 - Plate4_40X_100%_FAM120A.nd2 (series 1)	807527	38.877	0	1943	0	0	898.625	898.625	3.13943e+07	89.398	1188895216

## Sheet: G3BP1
	Label	Area	Mean	Min	Max	BX	BY	Width	Height	IntDen	%Area	RawIntDen
1	Plate2_40X_100%_G3BP1.nd2:c:1/4 - Plate2_40X_100%_G3BP1.nd2 (series 1)	807527	56.308	0	7582	0	0	898.625	898.625	4.54702e+07	89.596	1721947944			Gag	Protein	CFP	Dapi
2	Plate2_40X_100%_G3BP1.nd2:c:2/4 - Plate2_40X_100%_G3BP1.nd2 (series 1)	807527	40.486	0	1861	0	0	898.625	898.625	3.26936e+07	88.504	1238100910		Plate 2 (KD)	4.54702e+07	3.26936e+07	3.17971e+07	5.12595e+07
3	Plate2_40X_100%_G3BP1.nd2:c:3/4 - Plate2_40X_100%_G3BP1.nd2 (series 1)	807527	39.376	0	2159	0	0	898.625	898.625	3.17971e+07	86.456	1204149347		Plate 4 (No KD)	5.84208e+07	4.97051e+07	3.77029e+07	3.95418e+07
4	Plate2_40X_100%_G3BP1.nd2:c:4/4 - Plate2_40X_100%_G3BP1.nd2 (series 1)	807527	63.477	0	4453	0	0	898.625	898.625	5.12595e+07	91.408	1941188396		Normalized to Dapi	Gag	Protein	CFP
5	Plate4_40X_100%_G3BP1001.nd2:c:1/4 - Plate4_40X_100%_G3BP1001.nd2 (series 1)	807527	72.345	0	10296	0	0	898.625	898.625	5.84208e+07	90.381	2212385720		Protein KD	0.887059	0.637806	0.620316		%KD
6	Plate4_40X_100%_G3BP1001.nd2:c:2/4 - Plate4_40X_100%_G3BP1001.nd2 (series 1)	807527	61.552	0	8987	0	0	898.625	898.625	4.97051e+07	90.417	1882323971		No KD	1.47744	1.25703	0.953494		49.2607
7	Plate4_40X_100%_G3BP1001.nd2:c:3/4 - Plate4_40X_100%_G3BP1001.nd2 (series 1)	807527	46.689	0	2688	0	0	898.625	898.625	3.77029e+07	87.077	1427802684
8	Plate4_40X_100%_G3BP1001.nd2:c:4/4 - Plate4_40X_100%_G3BP1001.nd2 (series 1)	807527	48.967	0	1836	0	0	898.625	898.625	3.95418e+07	90.153	1497442406

## Sheet: GSDMA
	Label	Area	Mean	Min	Max	BX	BY	Width	Height	IntDen	%Area	RawIntDen
1	Plate2_40X_100%_GSDMA001.nd2:c:1/4 - Plate2_40X_100%_GSDMA001.nd2 (series 1)	807527	71.711	0	14044	0	0	898.625	898.625	5.79088e+07	90.215	2192995636			Gag	Protein	CFP	Dapi
2	Plate2_40X_100%_GSDMA001.nd2:c:2/4 - Plate2_40X_100%_GSDMA001.nd2 (series 1)	807527	29.526	0	1671	0	0	898.625	898.625	2.38433e+07	86.488	902942642		Plate 2 (KD)	5.79088e+07	2.38433e+07	3.61791e+07	6.92059e+07
3	Plate2_40X_100%_GSDMA001.nd2:c:3/4 - Plate2_40X_100%_GSDMA001.nd2 (series 1)	807527	44.802	0	1766	0	0	898.625	898.625	3.61791e+07	86.864	1370097379		Plate 4 (No KD)	4.57933e+07	2.36736e+07	3.09747e+07	2.65549e+07
4	Plate2_40X_100%_GSDMA001.nd2:c:4/4 - Plate2_40X_100%_GSDMA001.nd2 (series 1)	807527	85.701	0	9491	0	0	898.625	898.625	6.92059e+07	92.601	2620816238		Normalized to Dapi	Gag	Protein	CFP
5	Plate4_40X_100%_GSDMA.nd2:c:1/4 - Plate4_40X_100%_GSDMA.nd2 (series 1)	807527	56.708	0	4160	0	0	898.625	898.625	4.57933e+07	88.411	1734184861		Protein KD	0.836761	0.344527	0.522775		%KD
6	Plate4_40X_100%_GSDMA.nd2:c:2/4 - Plate4_40X_100%_GSDMA.nd2 (series 1)	807527	29.316	0	805	0	0	898.625	898.625	2.36736e+07	85.613	896515933		No KD	1.72448	0.891499	1.16644		61.3542
7	Plate4_40X_100%_GSDMA.nd2:c:3/4 - Plate4_40X_100%_GSDMA.nd2 (series 1)	807527	38.357	0	1987	0	0	898.625	898.625	3.09747e+07	85.512	1173006389
8	Plate4_40X_100%_GSDMA.nd2:c:4/4 - Plate4_40X_100%_GSDMA.nd2 (series 1)	807527	32.884	0	2174	0	0	898.625	898.625	2.65549e+07	89.075	1005627503

[truncated: 11 more sheets: HNRNPR, IGF2BP3, LRPPRC, MBOAT7, NCLN, RBM4, RBMX, RPL15, SRRM2, SRSF6, TRIM56]
